# Supplementary material for: Development and application of immobilized surfactant in mass spectrometry-based proteomics
Source: Royal Society of Chemistry journal article supplement (doi:10.1039/c7ra08874d), 2017-01-01
Supplement: c7ra08874d1.pdf [file c7ra08874d1.pdf]

## Support Information

### Development and application of immobilized surfactant in mass spectrometry-based proteomics

Qiong Wu,<sup>a,b</sup> Fenglong Jiao,<sup>b</sup> Fangyuan Gao,<sup>b</sup> Chaoshuang Xia,<sup>b</sup> Yayao Lv,<sup>b</sup> Qian Yu,<sup>b</sup> Yangjun Zhang,<sup>\*b</sup> and Xiaohong Qian<sup>\*b</sup>

a. School of Pharmacy, Guangdong Pharmaceutical University, Guangzhou 510006, Guangdong, China

b. State Key Laboratory of Proteomics, National Center for Protein Science Beijing, Beijing Institute of Radiation Medicine, Beijing 102206, China

Table of contents

Table S1. Denaturation methods of BSA solution

Table S2. Lysis buffer of four different extraction methods

Figure S1 Hysteresis loop of Fe<sub>3</sub>O<sub>4</sub> magnetite nanoparticle and Fe<sub>3</sub>O<sub>4</sub>@TMOS

Table S3. Peptide number and sequence coverage of BSA identified (control experiment)

Figure S2. Matched amino acids (control experiment)

Table S4. Peptide number and sequence coverage of BSA identified (95 °C)

Figure S3. Matched amino acids (95 °C)

Table S5. Peptide number and sequence coverage of BSA identified (Fe<sub>3</sub>O<sub>4</sub>@TMOS)

Figure S4. Matched amino acids (Fe<sub>3</sub>O<sub>4</sub>@TMOS)

Table S6. Identified proteins by (a) Fe<sub>3</sub>O<sub>4</sub>@TMOS, (b) H<sub>2</sub>O, (c) 0.1% SDS, (d) 4% SDS and (e) 8M UA

Figure S5. Overlap of identified proteins of HeLa cells extracted by Fe<sub>3</sub>O<sub>4</sub>@TMOS in three replicated experiments

Figure S6. Overlap of identified proteins of HeLa cells extracted by 0.1% SDS in three replicated experiments

Figure S7. Overlap of identified proteins of HeLa cells extracted by 8M UA in three replicated experiments

**Table S1.** Denaturation methods of BSA solution

|                        | The amount of BSA                                                     | Denaturation Methods                    |
|------------------------|-----------------------------------------------------------------------|-----------------------------------------|
| 1 (control experiment) |                                                                       | None                                    |
| 2                      | 10 $\mu\text{g}$ (0.1 $\mu\text{g}/\mu\text{L}$ , 100 $\mu\text{L}$ ) | 1.4% SDS                                |
| 3                      |                                                                       | $\text{Fe}_3\text{O}_4@\text{TMOS}$     |
| 4                      |                                                                       | heated at 95 $^\circ\text{C}$ for 5 min |

**Table S2.** Lysis buffer of four different extraction methods

|   | The amount of HeLa cells | Lysis Buffer                        |
|---|--------------------------|-------------------------------------|
| 1 | $2 \times 10^7$ cells    | 8M urea                             |
| 2 |                          | 4% SDS                              |
| 3 |                          | $\text{H}_2\text{O}$                |
| 4 |                          | $\text{Fe}_3\text{O}_4@\text{TMOS}$ |

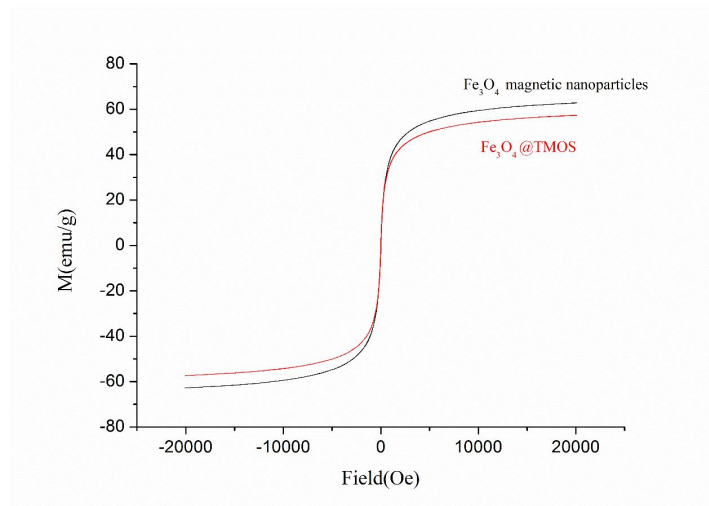**Figure S1.** Hysteresis loop of  $\text{Fe}_3\text{O}_4$  magnetite nanoparticle and  $\text{Fe}_3\text{O}_4@\text{TMOS}$ **Table S3.** Peptide number and sequence coverage of BSA identified (control experiment)

|          | MALDI 1            |                       | MALDI 2        |                       | MALDI 3                  |                       | Average        |                       |
|----------|--------------------|-----------------------|----------------|-----------------------|--------------------------|-----------------------|----------------|-----------------------|
|          | Peptide number     | Sequence coverage (%) | Peptide number | Sequence coverage (%) | Peptide number           | Sequence coverage (%) | Peptide number | Sequence coverage (%) |
| Sample 1 | 17                 | 23                    | 17             | 24                    | 17                       | 24                    | 17             | 23.7                  |
| Sample 2 | 21                 | 26                    | 18             | 23                    | 19                       | 24                    | 19             | 24.3                  |
| Sample 3 | 18                 | 24                    | 16             | 22                    | 17                       | 24                    | 17             | 23.3                  |
| Average  | Peptide number: 18 |                       |                |                       | Sequence coverage: 23.8% |                       |                |                       |

Matched amino acids are shown in bold red (allowing 2 missed cleavages):

1 MKWVTFISLL LLFSSAYSRG VFRR**DT**HKSE **I**AHR**F**KDLGE **E**HF**K**GLVLIA  
51 FSQYLQQCPF DEHVKLVNEL TEFAK**T**CVAD **E**SHAG**C**E**K**SL HTLFGDELCK

101 VASLRETYGD MADCCEKQEP ERNECFLSHK DDSPDLPKLK PDPNTLCDEF  
 151 KADEKKFWGK **YLYEIARRHP YFYAPELLYY ANKYNGVFQE CCQAEDKGAC**  
 201 LLPKIETMRE **KVLTSSARQR LRCASIQKFG ERALKAWSVA RLSQKFPKAE**  
 251 **FVEVTKLVTD LTKVHKECCH GDLLECADDR ADLAKYICDN QDTISSKLKE**  
 301 CCDKPLLEKS HCIAEVEKDA IPENLPPLTA DFAEDKDVCK NYQEAK**DAFL**  
 351 **GSFLYEYSRR HPEYAVSVLL RLAKEYEATL EECCAADDPH ACYSTVFDKL**  
 401 KHLVDEPQNL IKQNCDQFEK **LGEYGFQNAL IVRYTRKVPQ VSTPTLVEVS**  
 451 **RSLGKVGTRC CTKPESERMP CTEDYLSLIL NRLCVLHEKT PVSEKVTKCC**  
 501 TESLVNRRPC FSALTPDETY VPKAFDEKLF TFHADICTLP DTEK**QIKKQT**  
 551 **ALVELLKHKP KATEEQLKTV MENFVAFVDK CCAADDKEAC FAVEGPKLVV**  
 601 STQTALA

**Figure S2.** Matched amino acids (control experiment)

**Table S4.** Peptide number and sequence coverage of BSA identified (95 °C)

|          | MALDI 1            |                       | MALDI 2        |                       | MALDI 3                  |                       | Average        |                       |
|----------|--------------------|-----------------------|----------------|-----------------------|--------------------------|-----------------------|----------------|-----------------------|
|          | Peptide number     | Sequence coverage (%) | Peptide number | Sequence coverage (%) | Peptide number           | Sequence coverage (%) | Peptide number | Sequence coverage (%) |
| Sample 1 | 37                 | 39                    | 36             | 41                    | 37                       | 43                    | 37             | 41                    |
| Sample 2 | 31                 | 42                    | 31             | 42                    | 32                       | 42                    | 31             | 42                    |
| Sample 3 | 29                 | 41                    | 29             | 41                    | 30                       | 41                    | 29             | 41                    |
| Average  | Peptide number: 32 |                       |                |                       | Sequence coverage: 41.3% |                       |                |                       |

Matched amino acids are shown in bold red (allowing 2 missed cleavages):

1 MKWVTFISLL LLFSSAYSRG VFRR**DTHKSE IAHRFKDLGE EHFKGLVLIA**  
 51 **FSQYLQQCPF DEHVKLVNEL TEFAKTCVAD ESHAGCEKSL HTLFGDELCK**  
 101 VASLRETYGD MADCCEKQEP ERNECFLSHK DDSPDLPKLK PDPNTLCDEF  
 151 KADEKKFWGK **YLYEIARRHP YFYAPELLYY ANKYNGVFQE CCQAEDKGAC**  
 201 **LLPKIETMRE KVLTSSARQR LRCASIQKFG ERALKAWSVA RLSQKFPKAE**  
 251 **FVEVTKLVTD LTKVHKECCH GDLLECADDR ADLAKYICDN QDTISSKLKE**  
 301 CCDKPLLEKS HCIAEVEKDA IPENLPPLTA DFAEDKDVCK **NYQEAKDAFL**  
 351 **GSFLYEYSRR HPEYAVSVLL RLAKEYEATL EECCAADDPH ACYSTVFDKL**  
 401 **KHLVDEPQNL IKQNCDQFEK LGEYGFQNAL IVRYTRKVPQ VSTPTLVEVS**  
 451 **RSLGKVGTRC CTKPESERMP CTEDYLSLIL NRLCVLHEKT PVSEKVTKCC**  
 501 TESLVNRRPC FSALTPDETY VPKAFDEKLF **TFHADICTLP DTEKQIKKQT**  
 551 **ALVELLKHKP KATEEQLKTV MENFVAFVDK CCAADDKEAC FAVEGPKLVV**  
 601 STQTALA

**Figure S3.** Matched amino acids (95 °C)

**Table S5.** Peptide number and sequence coverage of BSA identified (Fe<sub>3</sub>O<sub>4</sub>@TMOS)

|  | MALDI 1 |          | MALDI 2 |          | MALDI 3 |          | Average |          |
|--|---------|----------|---------|----------|---------|----------|---------|----------|
|  | Peptide | Sequence | Peptide | Sequence | Peptide | Sequence | Peptide | Sequence |

|          | number             | coverage (%) | number | coverage (%) | number                   | coverage (%) | number | coverage (%) |
|----------|--------------------|--------------|--------|--------------|--------------------------|--------------|--------|--------------|
| Sample 1 | 33                 | 43           | 31     | 42           | 30                       | 42           | 31     | 42.3         |
| Sample 2 | 30                 | 42           | 27     | 42           | 28                       | 44           | 28     | 42.7         |
| Sample 3 | 32                 | 41           | 34     | 41           | 35                       | 42           | 34     | 41.3         |
| Average  | Peptide number: 31 |              |        |              | Sequence coverage: 42.1% |              |        |              |

Matched amino acids are shown in bold red (allowing 2 missed cleavages):

**1** MKWVTFISLL LLFSSAYSRG VFRR**DTHKSE IAHRFKDLGE EHFKGLVLIA**  
**51** **FSQYLQQCPF DEHVKLVNEL TEFAKTCVAD ESHAGCEK**SL HTLFGDELCK  
**101** VASLRETYGD MADCCEKQEP ERNECFLSHK DDSFDLPKPK PDPNTLCDEF  
**151** KADEKKFWGK **YLYEIARRHP YFYAPELLYY ANKYNGVFQE CCQAEDK**GAC****  
**201** **LLPKIETMRE KVL TSSARQR LRCASIQKFG ERALKAWSVA RLSQKFPKAE**  
**251** **FVEVTKLVTD LTK**VHKECCH GDLLECADDR ADLAKYICDN QDTISSKLKE  
**301** CCDKPLLEKS HCIAEVEKDA IPENLPPLTA DFAEDKDVCK NYQEAK**DAFL**  
**351** **GSFLYEYSRR HPEYAVSVLL RLAKEYEATL** EECCA KDDPH ACYSTVFDKL  
**401** **KHLVDEPQNL IKQNCDFEK LGEYGFQNAL** IVRYTRKVPQ VSTPTLVEVS  
**451** **RSLGKVGTRC CTKPESERMP CTEDYLSLIL NRLCVLHEKT PVSEKVT**KCC****  
**501** **TESLVNRRPC FSALTPDETY VPKAFDEKLF TFHADICTLP DTEKQIK**KQT****  
**551** **ALVELLKH**KP KATEEQLKTV MENFVAFVDK **CCAADDKEAC** FAVEGPKLVV  
**601** STQTALA

**Figure S4.** Matched amino acids (Fe<sub>3</sub>O<sub>4</sub>@TMOS)

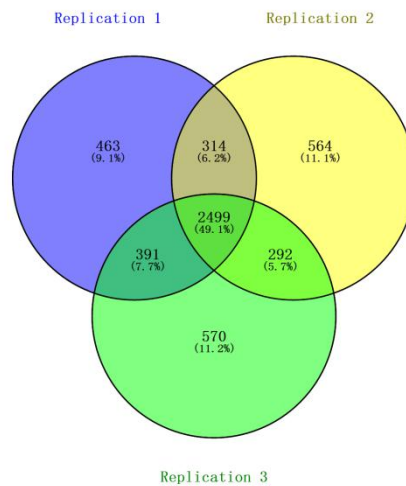

**Figure S5.** Overlapping of identified proteins of HeLa cells extracted by Fe<sub>3</sub>O<sub>4</sub>@TMOS in three replicated experiments

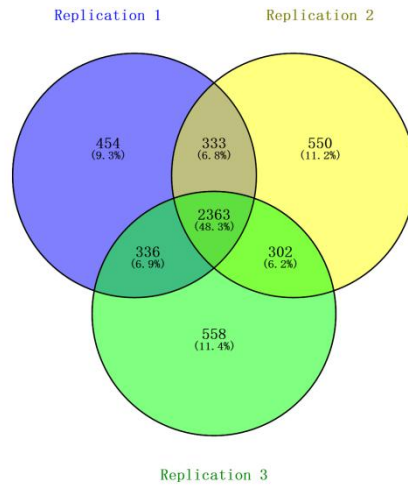

**Figure S6.** Overlapping of identified proteins of HeLa cells extracted by 0.1% SDS in three replicated experiments

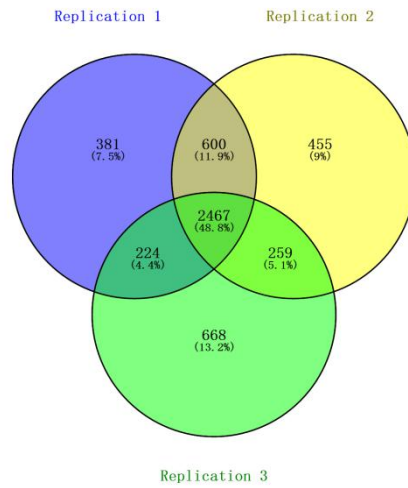

**Figure S7.** Overlapping of identified proteins of HeLa cells extracted by 8M UA in three replicated experiments

Table S6 (a). Identified proteins by Fe304@TMOS

| Accession  | Description         | Coverage   | # Peptides | # PSMs | # Unique Peptides | PMW [kDa] | calc. pI | Score | Mascot# | Peptides | Mascot |
|------------|---------------------|------------|------------|--------|-------------------|-----------|----------|-------|---------|----------|--------|
| Q15149     | Plectin OS-         | 52.5832622 | 217        | 300    | 209               | 531.5     | 5.96     | 4380  | 217     |          |        |
| P35579     | Myosin-9 OS-        | 58.9795918 | 117        | 208    | 116               | 226.4     | 5.6      | 4367  | 117     |          |        |
| P31327     | Carbamoyl- $\gamma$ | 69.2666667 | 100        | 235    | 99                | 164.8     | 6.74     | 3860  | 100     |          |        |
| 075369     | Filamin-B (63.      | 5664873    | 130        | 226    | 121               | 278       | 5.73     | 3614  | 130     |          |        |
| P49327     | Fatty acid          | 55.993628  | 115        | 211    | 114               | 273.3     | 6.44     | 3731  | 115     |          |        |
| P21333     | Filamin-A (54.      | 1367586    | 116        | 208    | 2                 | 280.6     | 6.06     | 3429  | 116     |          |        |
| Q60FE5     | Filamin A (53.      | 8931298    | 116        | 208    | 2                 | 278.1     | 6.06     | 3413  | 116     |          |        |
| V9HWB8     | Pyruvate kinase     | 85.6873823 | 54         | 228    | 54                | 57.9      | 7.84     | 5340  | 54      |          |        |
| Q1KLZ0     | HCG15971, i82.      | 6666667    | 37         | 359    | 1                 | 41.7      | 5.48     | 8757  | 37      |          |        |
| P63261     | Actin, cyto         | 82.6666667 | 37         | 358    | 1                 | 41.8      | 5.48     | 8755  | 37      |          |        |
| P08238     | Heat shock          | 67.1270718 | 71         | 276    | 46                | 83.2      | 5.03     | 5543  | 71      |          |        |
| P07900     | Heat shock          | 62.0218579 | 67         | 263    | 44                | 84.6      | 5.02     | 5119  | 67      |          |        |
| P15924     | Desmoplakin         | 52.9780564 | 138        | 197    | 138               | 331.6     | 6.81     | 3071  | 138     |          |        |
| P04406     | Glyceraldehyde      | 82.9850746 | 37         | 262    | 37                | 36        | 8.46     | 4364  | 37      |          |        |
| P06733     | Alpha-enolase       | 82.718894  | 49         | 238    | 36                | 47.1      | 7.39     | 6269  | 49      |          |        |
| Q14204     | Cytoplasmic         | 35.4498493 | 123        | 162    | 123               | 532.1     | 6.4      | 2164  | 123     |          |        |
| P10809     | 60 kDa heat         | 77.8359511 | 55         | 185    | 10                | 61        | 5.87     | 4285  | 55      |          |        |
| Q09666     | Neuroblast          | 46.8760611 | 119        | 185    | 119               | 628.7     | 6.15     | 1728  | 119     |          |        |
| AOA0G2JIW1 | Heat shock          | 67.4454829 | 53         | 181    | 7                 | 70.1      | 5.66     | 3550  | 53      |          |        |
| P78527     | DNA-dependent       | 31.5649225 | 109        | 147    | 109               | 468.8     | 7.12     | 2415  | 109     |          |        |
| P07437     | Tubulin beta        | 85.5855856 | 37         | 261    | 6                 | 49.6      | 4.89     | 4592  | 37      |          |        |
| P13639     | Elongation          | 63.8694639 | 65         | 202    | 63                | 95.3      | 6.83     | 3557  | 65      |          |        |
| P02768     | Serum albumin       | 81.1165846 | 60         | 157    | 60                | 69.3      | 6.28     | 2404  | 60      |          |        |
| V9HW22     | Epididymis          | 72.755418  | 58         | 213    | 48                | 70.9      | 5.52     | 3900  | 58      |          |        |
| P68371     | Tubulin beta        | 85.3932584 | 37         | 242    | 4                 | 49.8      | 4.89     | 4289  | 37      |          |        |
| AOA087WVQ6 | Clathrin heavy      | 49.9702204 | 71         | 128    | 71                | 191.9     | 5.69     | 2365  | 71      |          |        |
| P04075     | Fructose-biph       | 97.2527473 | 40         | 145    | 34                | 39.4      | 8.09     | 2920  | 40      |          |        |
| B7Z4F6     | cDNA FLJ54          | 74         | 49         | 160    | 4                 | 58.5      | 6.02     | 3355  | 49      |          |        |
| B4DWK5     | cDNA FLJ54          | 65.0080257 | 47         | 155    | 1                 | 68        | 5.5      | 3138  | 47      |          |        |
| V9HVZ7     | Epididymis          | 79.8206278 | 24         | 244    | 1                 | 25        | 5.66     | 6611  | 24      |          |        |
| P68104     | Elongation          | 66.8831169 | 34         | 191    | 4                 | 50.1      | 9.01     | 2739  | 34      |          |        |
| P00558     | Phosphoglyc         | 84.6522782 | 40         | 143    | 40                | 44.6      | 8.1      | 3087  | 40      |          |        |
| V9HWE1     | Epididymis          | 90.5579399 | 58         | 148    | 52                | 53.6      | 5.12     | 2358  | 58      |          |        |
| Q71U36     | Tubulin alpha       | 79.3791574 | 35         | 149    | 1                 | 50.1      | 5.06     | 3589  | 35      |          |        |
| P07814     | Bifunctional        | 56.8121693 | 65         | 107    | 65                | 170.5     | 7.33     | 1964  | 65      |          |        |
| P08779     | Keratin, type       | 79.2811839 | 47         | 140    | 26                | 51.2      | 5.05     | 2866  | 47      |          |        |
| P05787     | Keratin, type       | 80.7453416 | 57         | 147    | 44                | 53.7      | 5.59     | 2708  | 57      |          |        |
| P02545     | Prelamin-A/7        | 78.8614458 | 63         | 132    | 13                | 74.1      | 7.02     | 2997  | 63      |          |        |
| P04264     | Keratin, type       | 63.8198758 | 45         | 151    | 40                | 66        | 8.12     | 4887  | 45      |          |        |
| Q00839     | Heterogeneous       | 59.030303  | 51         | 129    | 50                | 90.5      | 6        | 2158  | 51      |          |        |
| P22626     | Heterogeneous       | 76.203966  | 35         | 123    | 32                | 37.4      | 8.95     | 2567  | 35      |          |        |
| P29401     | Transketolase       | 80.4173355 | 42         | 118    | 42                | 67.8      | 7.66     | 1757  | 42      |          |        |
| B2R6L0     | Tubulin beta        | 68.5393258 | 32         | 180    | 5                 | 49.9      | 4.89     | 3420  | 32      |          |        |
| O43707     | Alpha-actinin       | 65.532382  | 55         | 118    | 34                | 104.8     | 5.44     | 2293  | 55      |          |        |
| Q9BQE3     | Tubulin alpha       | 79.7327394 | 35         | 136    | 2                 | 49.9      | 5.1      | 3110  | 35      |          |        |
| AOA024R1A3 | Testicular          | 58.6956522 | 47         | 101    | 47                | 117.8     | 5.76     | 1835  | 47      |          |        |
| AOA024RB53 | Heterogeneous       | 83.4375    | 33         | 117    | 30                | 34.2      | 9.23     | 1691  | 33      |          |        |
| V9HWB4     | Epididymis          | 59.0214067 | 46         | 134    | 43                | 72.3      | 5.16     | 2914  | 46      |          |        |
| P26038     | Moesin OS-          | 67.0710572 | 51         | 121    | 38                | 67.8      | 6.4      | 2336  | 51      |          |        |
| P05783     | Keratin, type       | 91.1627907 | 43         | 116    | 41                | 48        | 5.45     | 1929  | 43      |          |        |
| P19338     | Nucleolin (39.      | 8591549    | 39         | 96     | 39                | 76.6      | 4.7      | 1986  | 39      |          |        |
| P02533     | Keratin, type       | 78.6016949 | 48         | 117    | 18                | 51.5      | 5.16     | 2165  | 48      |          |        |
| Q9NR30     | Nucleolar           | 62.1966794 | 51         | 95     | 50                | 87.3      | 9.28     | 1544  | 51      |          |        |
| AOA0S2Z428 | HCG2039812,         | 71.2765957 | 54         | 134    | 7                 | 60        | 8        | 2349  | 54      |          |        |
| P78371     | T-complex $\gamma$  | 74.7663551 | 37         | 77     | 37                | 57.5      | 6.46     | 2272  | 37      |          |        |
| P07355     | Annexin A2          | 84.660767  | 42         | 99     | 42                | 38.6      | 7.75     | 2391  | 42      |          |        |
| V9HW80     | Epididymis          | 62.1588089 | 52         | 92     | 52                | 89.3      | 5.26     | 1301  | 52      |          |        |
| P12814     | Alpha-actinin       | 66.7040359 | 50         | 97     | 29                | 103       | 5.41     | 1691  | 50      |          |        |
| 075643     | U5 small nuclear    | 35.6273408 | 56         | 79     | 56                | 244.4     | 6.06     | 1220  | 56      |          |        |
| P68366     | Tubulin alpha       | 69.6428571 | 29         | 129    | 9                 | 49.9      | 5.06     | 3115  | 29      |          |        |
| Q3BDU5     | Prelamin-A/7        | 8.2340862  | 52         | 103    | 2                 | 55.6      | 6.65     | 2031  | 52      |          |        |
| P46013     | Proliferation       | 32.0331695 | 66         | 92     | 66                | 358.5     | 9.45     | 1352  | 66      |          |        |
| Q53HR1     | Eukaryotic          | 66.6666667 | 26         | 112    | 1                 | 39.2      | 8.84     | 988   | 26      |          |        |
| P46940     | Ras GTPase-4        | 1.0380205  | 54         | 74     | 54                | 189.1     | 6.48     | 1238  | 54      |          |        |
| Q08211     | ATP-dependent       | 45.9055118 | 49         | 77     | 49                | 140.9     | 6.84     | 1572  | 49      |          |        |
| P58107     | Epiplakin (43.      | 9292731    | 59         | 73     | 4                 | 555.3     | 5.6      | 1040  | 59      |          |        |
| Q06830     | Peroxisome          | 73.3668342 | 25         | 96     | 22                | 22.1      | 8.13     | 1019  | 25      |          |        |
| P04083     | Annexin A1          | 76.5895954 | 32         | 69     | 32                | 38.7      | 7.02     | 1720  | 32      |          |        |
| P04259     | Keratin, type       | 64.893617  | 50         | 116    | 2                 | 60        | 8        | 1996  | 50      |          |        |
| P68032     | Actin, alpha        | 59.1511936 | 26         | 160    | 2                 | 42        | 5.39     | 2564  | 26      |          |        |
| AOA0S2Z491 | Nucleophosmin       | 70.7482993 | 23         | 78     | 5                 | 32.6      | 4.78     | 1487  | 23      |          |        |
| AOA087X1U6 | Epiplakin (42.      | 9048742    | 57         | 71     | 2                 | 555.3     | 5.62     | 992   | 57      |          |        |
| E5KNY5     | Leucine-rich        | 44.045911  | 50         | 76     | 49                | 157.8     | 6.13     | 1268  | 50      |          |        |
| P06744     | Glucose-6-ph        | 64.3369176 | 27         | 71     | 27                | 63.1      | 8.32     | 907   | 27      |          |        |
| P13645     | Keratin, type       | 53.5958904 | 33         | 92     | 27                | 58.8      | 5.21     | 2312  | 33      |          |        |

|            |             |             |    |     |    |       |       |      |    |
|------------|-------------|-------------|----|-----|----|-------|-------|------|----|
| P27708     | CAD protei  | 32.6741573  | 49 | 73  | 48 | 242.8 | 6.46  | 1006 | 49 |
| Q59HH3     | Trifunctio  | 54.0152964  | 37 | 64  | 37 | 112.1 | 7.36  | 1372 | 37 |
| Q9Y490     | Talin-1 OS  | -28.9256198 | 48 | 60  | 48 | 269.6 | 6.07  | 1418 | 48 |
| P08729     | Keratin, t  | 75.9061834  | 43 | 102 | 31 | 51.4  | 5.48  | 1943 | 43 |
| P02786     | Transferrin | 54.3421053  | 39 | 70  | 39 | 84.8  | 6.61  | 1482 | 39 |
| P38646     | Stress-70   | 151.6936672 | 36 | 82  | 35 | 73.6  | 6.16  | 1787 | 36 |
| P09874     | Poly [ADP-  | 153.7475345 | 44 | 76  | 44 | 113   | 8.88  | 1022 | 44 |
| P50990     | T-complex   | 170.9854015 | 41 | 79  | 41 | 59.6  | 5.6   | 1589 | 41 |
| P60174     | Triosephos  | 179.7202797 | 27 | 68  | 27 | 30.8  | 5.92  | 1535 | 27 |
| P11388     | DNA topois  | 39.0594383  | 52 | 78  | 43 | 174.3 | 8.72  | 1060 | 52 |
| Q04695     | Keratin, t  | 70.3703704  | 41 | 84  | 23 | 48.1  | 5.02  | 1426 | 41 |
| V9HW37     | Epididymis  | 66.5434381  | 30 | 69  | 29 | 59.6  | 5.66  | 1094 | 30 |
| P14625     | Endoplasm   | 145.2054795 | 36 | 59  | 34 | 92.4  | 4.84  | 1160 | 36 |
| AOA024R9W5 | HECT, UBA   | 16.0951075  | 46 | 66  | 46 | 481.6 | 5.22  | 1077 | 46 |
| AOA140VJQ2 | Testicular  | 67.5675676  | 19 | 65  | 1  | 28.4  | 4.72  | 1194 | 19 |
| B2RBD5     | Tubulin be  | 145.1111111 | 21 | 117 | 3  | 50.4  | 4.93  | 2551 | 21 |
| P26639     | Threonine-- | 60.3042877  | 43 | 78  | 41 | 83.4  | 6.67  | 1096 | 43 |
| J9R021     | Eukaryotic  | 45.3690304  | 61 | 93  | 61 | 166.4 | 6.79  | 897  | 61 |
| P13010     | X-ray repai | 53.5519126  | 36 | 64  | 35 | 82.7  | 5.81  | 998  | 36 |
| P67936     | Tropomyosi  | 81.4516129  | 33 | 67  | 17 | 28.5  | 4.69  | 1249 | 33 |
| P12270     | Nucleoprot  | 63.1781634  | 60 | 68  | 60 | 267.1 | 5.02  | 832  | 60 |
| Q5EC54     | Heterogene  | 65.7327586  | 27 | 72  | 1  | 51    | 5.33  | 1302 | 27 |
| V9HW31     | ATP synthas | 64.8393195  | 24 | 56  | 24 | 56.5  | 5.4   | 1246 | 24 |
| P36578     | 60S ribosom | 62.763466   | 33 | 88  | 33 | 47.7  | 11.06 | 1189 | 33 |
| P11586     | C-1-tetrahy | 60.4278075  | 48 | 74  | 47 | 101.5 | 7.3   | 1159 | 48 |
| P00338     | L-lactate c | 63.253012   | 24 | 69  | 21 | 36.7  | 8.27  | 1161 | 24 |
| P49368     | T-complex   | 165.1376147 | 33 | 81  | 33 | 60.5  | 6.49  | 1223 | 33 |
| P02787     | Serotransfe | 59.1690544  | 38 | 62  | 3  | 77    | 7.12  | 858  | 38 |
| P39023     | 60S ribosom | 58.808933   | 32 | 74  | 32 | 46.1  | 10.18 | 1011 | 32 |
| O60506     | Heterogene  | 61.4767255  | 36 | 66  | 27 | 69.6  | 8.59  | 908  | 36 |
| A8K7F6     | cDNA FLJ78  | 61.3300493  | 26 | 61  | 3  | 46.1  | 5.48  | 1549 | 26 |
| B4DJ30     | cDNA FLJ61  | 48.7437186  | 34 | 61  | 34 | 112.9 | 6.06  | 828  | 34 |
| P25705     | ATP synthas | 51.5370705  | 33 | 67  | 33 | 59.7  | 9.13  | 1306 | 33 |
| P50991     | T-complex   | 175.3246753 | 33 | 62  | 32 | 57.9  | 7.83  | 1296 | 33 |
| Q4LE36     | ACYL variat | 50.4837291  | 45 | 63  | 45 | 124.5 | 8.03  | 948  | 45 |
| P14866     | Heterogene  | 60.2716469  | 27 | 54  | 26 | 64.1  | 8.22  | 792  | 27 |
| AOAOS2Z4G8 | Tropomyosi  | 72.983871   | 29 | 63  | 11 | 28.7  | 4.72  | 1339 | 29 |
| B4DH02     | cDNA FLJ50  | 51.9047619  | 37 | 54  | 32 | 94.3  | 5.19  | 1277 | 37 |
| P23246     | Splicing f  | 47.8076379  | 36 | 68  | 35 | 76.1  | 9.44  | 1011 | 36 |
| AOAOS2Z4Z9 | Non-POU don | 66.6666667  | 35 | 70  | 34 | 54.2  | 8.95  | 1140 | 35 |
| P17987     | T-complex   | 155.9352518 | 31 | 62  | 31 | 60.3  | 6.11  | 1328 | 31 |
| E9KL35     | Epididymis  | 84.2271293  | 29 | 65  | 29 | 35.1  | 7.69  | 1206 | 29 |
| B4DUQ1     | cDNA FLJ54  | 64.0091116  | 28 | 70  | 2  | 48.5  | 5.92  | 1276 | 28 |
| AOAOKOK1H8 | Epididymis  | 59.1690544  | 37 | 57  | 2  | 77    | 7.21  | 845  | 37 |
| Q6FHU2     | Phosphogly  | 74.8031496  | 20 | 65  | 20 | 28.8  | 7.18  | 1628 | 20 |
| AOA024RCN6 | Valyl-tRNA  | 41.6139241  | 39 | 60  | 39 | 140.4 | 7.59  | 961  | 39 |
| P62081     | 40S ribosom | 74.2268041  | 20 | 62  | 20 | 22.1  | 10.1  | 798  | 20 |
| B5BUE6     | ATP-depend  | 55.5374593  | 37 | 83  | 29 | 69.1  | 8.92  | 1213 | 37 |
| P30101     | Protein dis | 66.5346535  | 29 | 60  | 24 | 56.7  | 6.35  | 1067 | 29 |
| P49411     | Elongation  | 65.2654867  | 24 | 49  | 24 | 49.5  | 7.61  | 991  | 24 |
| A8KAP3     | cDNA FLJ78  | 52.1604938  | 38 | 52  | 36 | 109.4 | 5.01  | 752  | 38 |
| P26599     | Polypyrimic | 54.2372881  | 19 | 62  | 16 | 57.2  | 9.17  | 1084 | 19 |
| P13647     | Keratin, t  | 47.6271186  | 40 | 92  | 19 | 62.3  | 7.74  | 1437 | 40 |
| Q08J23     | tRNA (cytos | 55.1499348  | 31 | 54  | 31 | 86.4  | 6.77  | 807  | 31 |
| P12956     | X-ray repai | 49.4252874  | 34 | 66  | 34 | 69.8  | 6.64  | 1086 | 34 |
| O15067     | Phosphoric  | 37.2197309  | 33 | 48  | 33 | 144.6 | 5.76  | 692  | 33 |
| AOA0D9SF53 | ATP-depend  | 50.0682128  | 32 | 59  | 31 | 81.4  | 8.07  | 1012 | 32 |
| Q01469     | Fatty acid- | 93.3333333  | 20 | 47  | 20 | 15.2  | 7.01  | 965  | 20 |
| A8K486     | Peptidyl-p  | 89.6969697  | 16 | 79  | 16 | 18    | 6.9   | 1748 | 16 |
| E9KL44     | Epididymis  | 63.0406291  | 39 | 55  | 39 | 82.9  | 9.04  | 787  | 39 |
| P33991     | DNA replic  | 50.2896871  | 33 | 46  | 33 | 96.5  | 6.74  | 1055 | 33 |
| P48594     | Serpin B4   | (62.8205128 | 27 | 57  | 9  | 44.8  | 6.21  | 1173 | 27 |
| O43175     | D-3-phosph  | 59.2870544  | 29 | 60  | 29 | 56.6  | 6.71  | 1301 | 29 |
| P63104     | 14-3-3 prot | 59.1836735  | 23 | 55  | 18 | 27.7  | 4.79  | 1292 | 23 |
| Q9UMS4     | Pre-mRNA-p  | 174.0079365 | 24 | 41  | 24 | 55.1  | 6.61  | 716  | 24 |
| P13797     | Plastin-3   | (52.0634921 | 28 | 50  | 25 | 70.8  | 5.6   | 1046 | 28 |
| Q02790     | Peptidyl-p  | 176.2527233 | 30 | 49  | 30 | 51.8  | 5.43  | 745  | 30 |
| P49736     | DNA replic  | 47.0132743  | 35 | 49  | 35 | 101.8 | 5.52  | 999  | 35 |
| P52272     | Heterogene  | 62.1917808  | 38 | 64  | 21 | 77.5  | 8.7   | 980  | 38 |
| Q59FF0     | EBNA-2 co-  | 52.3858921  | 37 | 59  | 37 | 107.4 | 7.52  | 656  | 37 |
| Q13813     | Spectrin a  | 125.3640777 | 42 | 50  | 42 | 284.4 | 5.35  | 839  | 42 |
| P23396     | 40S ribosom | 89.7119342  | 36 | 69  | 36 | 26.7  | 9.66  | 1042 | 36 |
| P00966     | Argininosu  | 73.3009709  | 25 | 54  | 25 | 46.5  | 8.02  | 664  | 25 |
| Q16881     | Thioredoxin | 47.6117103  | 26 | 40  | 25 | 70.9  | 7.39  | 947  | 26 |
| P11413     | Glucose-6-  | 171.8446602 | 33 | 57  | 33 | 59.2  | 6.84  | 703  | 33 |
| Q1ELT0     | MHC Class   | 166.3013699 | 21 | 46  | 12 | 41    | 6.9   | 975  | 21 |
| P12268     | Inosine-5'  | -53.1128405 | 26 | 47  | 24 | 55.8  | 6.9   | 794  | 26 |

|            |                 |               |    |     |    |       |       |      |    |
|------------|-----------------|---------------|----|-----|----|-------|-------|------|----|
| P51991     | Heterogene      | 54.2328042    | 26 | 60  | 4  | 39.6  | 9.01  | 601  | 26 |
| B4DLV7     | Rab GDP dis     | 70.3786192    | 23 | 38  | 18 | 51.1  | 8.18  | 594  | 23 |
| Q9NZM1     | Myoferlin       | (29.7428433   | 42 | 53  | 42 | 234.6 | 6.18  | 471  | 42 |
| B4DDB6     | Heterogene      | 52.247191     | 24 | 56  | 2  | 37    | 8.31  | 609  | 24 |
| AOA0S2Z4A5 | DNA helicase    | 50.069541     | 30 | 51  | 30 | 81.3  | 6.46  | 956  | 30 |
| AOA024R4K3 | Malate dehyd    | 73.3727811    | 24 | 56  | 24 | 35.5  | 8.68  | 1329 | 24 |
| P15121     | Aldose reduct   | 76.5822785    | 23 | 57  | 21 | 35.8  | 6.98  | 696  | 23 |
| A8MXP9     | Matrin-3        | 0544.4692737  | 31 | 59  | 31 | 99.9  | 6.04  | 691  | 31 |
| Q01813     | ATP-dependent   | 52.8061224    | 32 | 45  | 29 | 85.5  | 7.55  | 898  | 32 |
| J3KN67     | Tropomyosin     | 62.1052632    | 23 | 56  | 6  | 33.2  | 4.77  | 1187 | 23 |
| E1NZA1     | Peroxisome      | 21.0033695    | 44 | 53  | 44 | 292.6 | 7.43  | 911  | 44 |
| P35908     | Keratin, type   | 52.4256651    | 31 | 69  | 21 | 65.4  | 8     | 1291 | 31 |
| B2R6J2     | cDNA, FLJ92     | 56.8259386    | 37 | 77  | 24 | 69.4  | 6.27  | 1044 | 37 |
| P23528     | Cofilin-1       | (86.746988    | 18 | 48  | 10 | 18.5  | 8.09  | 1108 | 18 |
| AOA024RDY0 | RAN binding     | 42.7529626    | 34 | 45  | 34 | 123.6 | 4.94  | 716  | 34 |
| P31939     | Bifunctional    | 70.6081081    | 34 | 46  | 34 | 64.6  | 6.71  | 663  | 34 |
| Q53SS8     | Epididymis      | 83.988764     | 16 | 45  | 12 | 37.5  | 7.09  | 865  | 16 |
| V9HW25     | Epididymis      | 49.6478873    | 24 | 52  | 11 | 33    | 4.67  | 919  | 24 |
| O60664     | Perilipin-3     | 64.516129     | 21 | 38  | 21 | 47    | 5.44  | 850  | 21 |
| V9HW43     | Epididymis      | 90.7317073    | 19 | 63  | 19 | 22.8  | 6.4   | 1322 | 19 |
| V9HWC7     | Epididymis      | 73.2142857    | 19 | 41  | 19 | 25    | 6.38  | 766  | 19 |
| P62701     | 40S ribosome    | 78.3269962    | 30 | 60  | 30 | 29.6  | 10.15 | 970  | 30 |
| Q15393     | Splicing factor | 33.1963846    | 31 | 47  | 31 | 135.5 | 5.26  | 810  | 31 |
| AOA024R8S5 | Protein disulf  | 56.6929134    | 30 | 53  | 30 | 57.1  | 4.87  | 876  | 30 |
| Q16658     | Fascin          | 05170.1825558 | 28 | 53  | 28 | 54.5  | 7.24  | 881  | 28 |
| B2RDY9     | Adenylyl cycl   | 57.4736842    | 28 | 48  | 27 | 51.6  | 8.22  | 873  | 28 |
| A3ROT8     | Histone H1,     | 43.8356164    | 17 | 75  | 5  | 21.9  | 11.03 | 1553 | 17 |
| Q13263     | Transcripti     | 49.4610778    | 28 | 43  | 28 | 88.5  | 5.77  | 807  | 28 |
| Q6P2Q9     | Pre-mRNA pro    | 23.4689507    | 44 | 60  | 44 | 273.4 | 8.84  | 646  | 44 |
| Q53HV2     | Chaperonin      | 70.718232     | 32 | 53  | 32 | 59.3  | 7.65  | 996  | 32 |
| P22234     | Multifuncti     | 50.3529412    | 25 | 47  | 25 | 47    | 7.23  | 978  | 25 |
| P41091     | Eukaryotic      | 58.2627119    | 25 | 45  | 25 | 51.1  | 8.4   | 666  | 25 |
| P05387     | 60S acidic      | 97.3913043    | 11 | 33  | 10 | 11.7  | 4.54  | 1036 | 11 |
| P23921     | Ribonucleos     | 41.0353535    | 26 | 47  | 26 | 90    | 7.15  | 930  | 26 |
| Q9UQ80     | Proliferati     | 58.8832487    | 30 | 52  | 30 | 43.8  | 6.55  | 811  | 30 |
| P61247     | 40S ribosome    | 70.4545455    | 30 | 56  | 30 | 29.9  | 9.73  | 921  | 30 |
| E7EVA0     | Microtubule     | 19.024815     | 31 | 45  | 31 | 245.3 | 6.23  | 666  | 31 |
| AOA024RAC5 | Regulator       | 50.7662835    | 21 | 39  | 21 | 56    | 8.78  | 807  | 21 |
| P49588     | Alanine-tRNA    | 36.2603306    | 31 | 43  | 31 | 106.7 | 5.53  | 806  | 31 |
| P40227     | T-complex       | 50.2824859    | 24 | 48  | 24 | 58    | 6.68  | 1146 | 24 |
| Q4W4Y1     | Dopamine re     | 44.0092166    | 34 | 46  | 34 | 96    | 6.52  | 743  | 34 |
| A2RUM7     | Ribosomal p     | 55.2188552    | 22 | 59  | 22 | 34.3  | 9.72  | 1006 | 22 |
| P62258     | 14-3-3 prot     | 76.8627451    | 20 | 52  | 18 | 29.2  | 4.74  | 749  | 20 |
| AOA0C4DG17 | 40S ribosome    | 63            | 17 | 42  | 17 | 33.3  | 4.87  | 1048 | 17 |
| Q86UP2     | Kinectin        | 0535.5195284  | 38 | 47  | 38 | 156.2 | 5.64  | 767  | 38 |
| P11940     | Polyadenyl      | 51.7295597    | 32 | 52  | 4  | 70.6  | 9.5   | 947  | 32 |
| A8K008     | Uncharacter     | 40.6779661    | 14 | 45  | 7  | 51.6  | 8.16  | 733  | 14 |
| Q6S8J3     | POTE ankyri     | 13.5813953    | 13 | 128 | 1  | 121.3 | 6.2   | 3822 | 13 |
| Q59ER5     | WD repeat       | 53.0448718    | 23 | 36  | 23 | 68.1  | 7.23  | 687  | 23 |
| P62917     | 60S ribosome    | 70.0389105    | 25 | 49  | 25 | 28    | 11.03 | 793  | 25 |
| Q4LE64     | NUMA1 vari      | 25.1768034    | 40 | 45  | 40 | 238.7 | 5.81  | 723  | 40 |
| P41250     | Glycine-tRNA    | 46.4140731    | 25 | 47  | 24 | 83.1  | 7.03  | 503  | 25 |
| Q9BUF5     | Tubulin beta    | 58.7443946    | 21 | 100 | 12 | 49.8  | 4.88  | 1439 | 21 |
| B4EOX8     | cDNA FLJ61      | 053.736089    | 31 | 54  | 26 | 66.2  | 7.56  | 773  | 31 |
| P16403     | Histone H1,     | 45.0704225    | 16 | 65  | 4  | 21.4  | 10.93 | 1539 | 16 |
| B3KT93     | Polyadenyl      | 44.0251572    | 30 | 49  | 2  | 70.6  | 9.52  | 937  | 30 |
| P49915     | GMP synthase    | 50.5050505    | 24 | 38  | 24 | 76.7  | 6.87  | 488  | 24 |
| G8JLB6     | Heterogene      | 54.6610169    | 21 | 49  | 13 | 51.2  | 6.8   | 1176 | 21 |
| V9HWC9     | Superoxide      | 84.4155844    | 9  | 33  | 9  | 15.9  | 6.13  | 577  | 9  |
| Q5JR94     | 40S ribosome    | 62.9807692    | 21 | 50  | 21 | 24.2  | 10.32 | 828  | 21 |
| B5MDF5     | GTP-binding     | 50.2145923    | 19 | 56  | 19 | 26.2  | 7.01  | 1010 | 19 |
| Q16891     | MICOS complex   | 41.5567282    | 28 | 44  | 28 | 83.6  | 6.48  | 591  | 28 |
| P62805     | Histone H4      | 62.1359223    | 18 | 55  | 18 | 11.4  | 11.36 | 1137 | 18 |
| O43390     | Heterogene      | 54.3443918    | 30 | 56  | 21 | 70.9  | 8.13  | 954  | 30 |
| A8K492     | cDNA FLJ76      | 31.1111111    | 22 | 35  | 22 | 101.1 | 6.16  | 571  | 22 |
| P23526     | Adenosylhom     | 53.2407407    | 28 | 44  | 26 | 47.7  | 6.34  | 1004 | 28 |
| AOA024RDS1 | Heat shock      | 39.5104895    | 27 | 43  | 23 | 96.8  | 5.39  | 845  | 27 |
| B5BU24     | 14-3-3 prot     | 60.9756098    | 20 | 48  | 1  | 28.1  | 4.83  | 816  | 20 |
| V9HWD6     | Epididymis      | 60.9756098    | 20 | 47  | 1  | 28.1  | 4.83  | 816  | 20 |
| V9HWK2     | Epididymis      | 33.2451499    | 30 | 40  | 30 | 123.7 | 5.66  | 598  | 30 |
| Q8NC51     | Plasminogen     | 42.8921569    | 18 | 42  | 18 | 44.9  | 8.65  | 625  | 18 |
| P09972     | Fructose-bi     | 37.6373626    | 13 | 50  | 7  | 39.4  | 6.87  | 721  | 13 |
| Q12906     | Interleukin     | 39.9328859    | 28 | 52  | 25 | 95.3  | 8.76  | 795  | 28 |
| Q59F66     | DEAD box pr     | 42.605156     | 31 | 56  | 22 | 81    | 7.93  | 1048 | 31 |
| Q13283     | Ras GTPase      | 54.9356223    | 18 | 42  | 17 | 52.1  | 5.52  | 609  | 18 |
| Q14566     | DNA replicat    | 40.316687     | 25 | 45  | 25 | 92.8  | 5.41  | 758  | 25 |
| Q13707     | ACTA2 prote     | 57.5757576    | 18 | 105 | 1  | 36.8  | 5.35  | 1921 | 18 |



|            |              |             |    |    |    |       |       |      |    |
|------------|--------------|-------------|----|----|----|-------|-------|------|----|
| P20700     | Lamin-B1     | 51.1945392  | 30 | 40 | 28 | 66.4  | 5.16  | 696  | 30 |
| P26641     | Elongation   | 51.2585812  | 22 | 59 | 22 | 50.1  | 6.67  | 1151 | 22 |
| I3L504     | Eukaryotic   | 60.2150538  | 14 | 45 | 14 | 20.5  | 5.25  | 722  | 14 |
| Q16531     | DNA damage-  | 36.4035088  | 30 | 38 | 30 | 126.9 | 5.26  | 576  | 30 |
| Q9NZT1     | Calmodulin-  | 93.1506849  | 17 | 32 | 17 | 15.9  | 4.44  | 826  | 17 |
| J3KPF3     | 4F2 cell-st  | 36.133122   | 17 | 34 | 17 | 68.1  | 5.05  | 672  | 17 |
| Q9Y5B9     | FACT complex | 32.4737345  | 28 | 41 | 28 | 119.8 | 5.66  | 476  | 28 |
| AOA087X1N8 | Serpin B6    | (52.9113924 | 19 | 32 | 18 | 44.8  | 5.68  | 866  | 19 |
| V9HWA9     | Epididymis   | 24.0529164  | 35 | 46 | 35 | 187   | 6.4   | 510  | 35 |
| Q6IQ30     | Polyadenyl-  | 36.2121212  | 24 | 40 | 12 | 72.3  | 9.35  | 871  | 24 |
| Q13838     | Spliceosome  | 57.4766355  | 21 | 40 | 9  | 49    | 5.67  | 649  | 21 |
| P55884     | Eukaryotic   | 38.5749386  | 27 | 41 | 27 | 92.4  | 5     | 561  | 27 |
| P49748     | Very long-c  | 50.8396947  | 21 | 31 | 21 | 70.3  | 8.75  | 748  | 21 |
| Q14103     | Heterogene   | 46.1971831  | 20 | 38 | 17 | 38.4  | 7.81  | 730  | 20 |
| E7EUU4     | Eukaryotic   | 27.3717949  | 32 | 47 | 2  | 171.5 | 5.31  | 533  | 32 |
| B4DS19     | cDNA FLJ56   | 28.1746032  | 32 | 47 | 2  | 166.5 | 5.22  | 558  | 32 |
| P07737     | Profilin-1   | 79.2857143  | 19 | 48 | 19 | 15    | 8.27  | 1041 | 19 |
| AOA087WUZ3 | Spectrin be  | 19.2730347  | 33 | 37 | 29 | 274.7 | 5.57  | 589  | 33 |
| O15371     | Eukaryotic   | 56.3868613  | 25 | 36 | 25 | 63.9  | 6.05  | 540  | 25 |
| P29508     | Serpin B3    | (56.1538462 | 25 | 46 | 7  | 44.5  | 6.81  | 743  | 25 |
| Q16576     | Histone-bir  | 56.8823529  | 17 | 33 | 12 | 47.8  | 5.05  | 372  | 17 |
| AOA024RBS2 | 60S acidic   | 62.1451104  | 16 | 34 | 16 | 34.3  | 5.97  | 593  | 16 |
| P09429     | High mobili  | 57.6744186  | 17 | 51 | 12 | 24.9  | 5.74  | 596  | 17 |
| AOA024RBH2 | Cytoskelet   | 51.8272425  | 22 | 31 | 21 | 66    | 5.92  | 837  | 22 |
| P05023     | Sodium/pot   | 36.8523949  | 31 | 41 | 31 | 112.8 | 5.49  | 694  | 31 |
| J3KSZ0     | Eukaryotic   | 70.8695652  | 18 | 39 | 1  | 26.8  | 7.88  | 821  | 18 |
| Q9HBB3     | 60S riboso   | 45.3287197  | 22 | 58 | 22 | 32.9  | 10.58 | 848  | 22 |
| B4D154     | cDNA FLJ56   | 28.3687943  | 21 | 56 | 2  | 77.5  | 8.06  | 1458 | 21 |
| AOA140VJT8 | Testicular   | 57.7006508  | 17 | 25 | 17 | 49.9  | 4.82  | 644  | 17 |
| Q59G75     | Isoleucyl-   | 31.3526192  | 30 | 36 | 30 | 146.3 | 6.35  | 525  | 30 |
| B5BUB1     | RuvB-like    | 159.4298246 | 22 | 36 | 22 | 50.2  | 6.42  | 606  | 22 |
| AOA0S2Z410 | Hydroxyste   | 79.3103448  | 14 | 26 | 14 | 26.9  | 7.78  | 906  | 14 |
| V9HW88     | Calreticuli  | 58.5131894  | 20 | 48 | 20 | 48.1  | 4.44  | 759  | 20 |
| Q5U077     | L-lactate    | 60.7784431  | 22 | 48 | 19 | 36.6  | 6.05  | 1122 | 22 |
| BOAZQ4     | Structural   | 34.1002465  | 31 | 38 | 30 | 141.4 | 7.18  | 625  | 31 |
| B2R7C5     | DNA helica   | 38.3663366  | 24 | 32 | 24 | 91    | 5.77  | 636  | 24 |
| B5BUB5     | Autoantige   | 54.4117647  | 23 | 38 | 23 | 46.8  | 7.12  | 527  | 23 |
| B2R5B3     | Histone H2   | 68.4615385  | 12 | 72 | 4  | 14.1  | 11.06 | 1010 | 12 |
| P31040     | Succinate    | 38.5542169  | 20 | 31 | 20 | 72.6  | 7.39  | 600  | 20 |
| P02679     | Fibrinogen   | 55.4083885  | 19 | 28 | 19 | 51.5  | 5.62  | 473  | 19 |
| O43143     | Pre-mRNA-s   | 40.2515723  | 26 | 42 | 26 | 90.9  | 7.46  | 694  | 26 |
| V9HWH2     | Creatine ki  | 67.7165354  | 18 | 34 | 18 | 42.6  | 5.59  | 467  | 18 |
| AOA0A0MSS8 | Aldo-keto    | 160.6811146 | 17 | 32 | 12 | 36.8  | 7.94  | 648  | 17 |
| AOAOKOK1K4 | Proteasome   | 62.5        | 15 | 30 | 15 | 27.9  | 8.46  | 731  | 15 |
| P14923     | Junction p   | 143.2214765 | 24 | 42 | 24 | 81.7  | 6.14  | 763  | 24 |
| Q8NE71     | ATP-binding  | 35.2662722  | 23 | 32 | 23 | 95.9  | 6.8   | 542  | 23 |
| AOA024R7T3 | Heterogene   | 48.9156627  | 14 | 34 | 12 | 45.6  | 5.58  | 740  | 14 |
| P47929     | Galectin-7   | 89.7058824  | 14 | 37 | 14 | 15.1  | 7.62  | 825  | 14 |
| B1AHB0     | DNA helica   | 42.6430518  | 27 | 42 | 27 | 82.2  | 8.37  | 507  | 27 |
| B5ME19     | Eukaryotic   | 33.1509847  | 26 | 44 | 26 | 105.4 | 5.64  | 695  | 26 |
| P27348     | 14-3-3 pr    | 53.0612245  | 20 | 44 | 14 | 27.7  | 4.78  | 856  | 20 |
| P07954     | Fumarate h   | 53.9215686  | 18 | 33 | 18 | 54.6  | 8.76  | 431  | 18 |
| P34897     | Serine hydr  | 45.4365079  | 20 | 34 | 19 | 56    | 8.53  | 755  | 20 |
| P38919     | Eukaryotic   | 45.4987835  | 21 | 36 | 18 | 46.8  | 6.73  | 735  | 21 |
| P08727     | Keratin, ty  | 59          | 25 | 42 | 17 | 44.1  | 5.14  | 740  | 25 |
| A8K984     | Structural   | 32.8320802  | 29 | 37 | 29 | 135.5 | 8.43  | 537  | 29 |
| P31689     | DnaJ homol   | 52.1410579  | 17 | 30 | 17 | 44.8  | 7.08  | 484  | 17 |
| A8K3H8     | cDNA FLJ77   | 33.7860781  | 18 | 26 | 15 | 65.3  | 5.11  | 493  | 18 |
| P27635     | 60S riboso   | 74.2990654  | 21 | 36 | 21 | 24.6  | 10.08 | 632  | 21 |
| P17812     | CTP synth    | 50.4230118  | 25 | 38 | 25 | 66.6  | 6.46  | 472  | 25 |
| Q13435     | Splicing f   | 37.9888268  | 26 | 34 | 26 | 100.2 | 5.67  | 314  | 26 |
| P30048     | Thioredoxi   | 57.8125     | 13 | 28 | 13 | 27.7  | 7.78  | 463  | 13 |
| P62979     | Ubiquitin-   | 67.9487179  | 13 | 59 | 13 | 18    | 9.64  | 1122 | 13 |
| Q05639     | Elongation   | 36.7170626  | 16 | 86 | 4  | 50.4  | 9.03  | 1581 | 16 |
| Q6I9V5     | SLC25A6 pr   | 67.7852349  | 24 | 44 | 9  | 32.8  | 9.74  | 688  | 24 |
| P49321     | Nuclear aut  | 40.3553299  | 17 | 25 | 17 | 85.2  | 4.3   | 512  | 17 |
| P13667     | Protein di   | 45.4263566  | 25 | 39 | 25 | 72.9  | 5.07  | 436  | 25 |
| AOA024R4U3 | Tubulin ty   | 50.7763975  | 21 | 32 | 21 | 74.4  | 5.53  | 362  | 21 |
| AOA0S2Z4J1 | Hydroxyste   | 33.5597826  | 19 | 25 | 19 | 79.6  | 8.84  | 710  | 19 |
| Q5U0F4     | Eukaryotic   | 72          | 19 | 28 | 19 | 36.5  | 5.64  | 373  | 19 |
| Q15181     | Inorganic    | 68.16609    | 16 | 28 | 15 | 32.6  | 5.86  | 347  | 16 |
| P62424     | 60S riboso   | 55.2631579  | 22 | 46 | 21 | 30    | 10.61 | 801  | 22 |
| P31930     | Cytochrome   | 50          | 16 | 23 | 16 | 52.6  | 6.37  | 519  | 16 |
| P62633     | Cellular nt  | 57.0621469  | 10 | 23 | 10 | 19.5  | 7.71  | 498  | 10 |
| Q9Y230     | RuvB-like    | 58.5313175  | 23 | 30 | 23 | 51.1  | 5.64  | 685  | 23 |
| AOA140VK27 | Leukotrien   | 47.4631751  | 21 | 29 | 21 | 69.2  | 6.18  | 464  | 21 |
| O75533     | Splicing f   | 31.6717791  | 31 | 42 | 31 | 145.7 | 7.09  | 342  | 31 |

|            |             |              |    |    |    |       |       |      |    |
|------------|-------------|--------------|----|----|----|-------|-------|------|----|
| P23284     | Peptidyl-pr | 67.1296296   | 16 | 34 | 16 | 23.7  | 9.41  | 831  | 16 |
| Q9NTJ3     | Structural  | 28.8819876   | 31 | 36 | 31 | 147.1 | 6.79  | 495  | 31 |
| AOA0S2Z4R1 | Tyrosine--t | 59.469697    | 27 | 34 | 27 | 59.1  | 7.05  | 450  | 27 |
| P47897     | Glutamine-- | 44.7741935   | 28 | 37 | 1  | 87.7  | 7.15  | 473  | 28 |
| Q08945     | FACT compl  | 33.145275    | 25 | 35 | 25 | 81    | 6.87  | 488  | 25 |
| B2RBR9     | cDNA, FLJ9  | 34.0182648   | 23 | 43 | 23 | 97.1  | 4.78  | 749  | 23 |
| P54886     | Delta-1-pp  | 32.327044    | 18 | 26 | 18 | 87.2  | 7.12  | 474  | 18 |
| O76021     | Ribosomal l | 52.0408163   | 25 | 39 | 25 | 54.9  | 10.13 | 538  | 25 |
| AOA024R904 | Calcyclin t | 81.5789474   | 16 | 27 | 16 | 26.2  | 8.25  | 618  | 16 |
| V9HW89     | Epididymis  | 58.5434174   | 15 | 25 | 15 | 38.3  | 7.97  | 539  | 15 |
| AOA024RBB7 | Nucleosome  | 36.3171355   | 10 | 20 | 8  | 45.3  | 4.46  | 451  | 10 |
| P39687     | Acidic leuc | 38.1526104   | 17 | 40 | 11 | 28.6  | 4.09  | 586  | 17 |
| P38606     | V-type pro  | 37.7633712   | 16 | 26 | 16 | 68.3  | 5.52  | 515  | 16 |
| B2RB23     | cDNA, FLJ9  | 61.4609572   | 19 | 23 | 19 | 42    | 8.25  | 419  | 19 |
| AOA1B0GVU9 | Glutamine-- | 46.7391304   | 28 | 37 | 1  | 83.7  | 7.44  | 417  | 28 |
| P05198     | Eukaryotic  | 72.6984127   | 24 | 35 | 24 | 36.1  | 5.08  | 596  | 24 |
| P21796     | Voltage-de  | 80.2120141   | 20 | 36 | 20 | 30.8  | 8.54  | 660  | 20 |
| A8K690     | cDNA FLJ7   | 64.5138122   | 23 | 34 | 23 | 62.6  | 6.8   | 539  | 23 |
| Q32Q12     | Nucleoside  | 72.6027397   | 15 | 37 | 6  | 32.6  | 8.48  | 616  | 15 |
| O75534     | Cold shock  | 42.3558897   | 27 | 40 | 27 | 88.8  | 6.25  | 499  | 27 |
| Q93077     | Histone H2  | 68.4615385   | 10 | 62 | 2  | 14.1  | 11.05 | 989  | 10 |
| P51858     | Hepatoma-d  | 62.0833333   | 13 | 27 | 11 | 26.8  | 4.73  | 462  | 13 |
| P53621     | Coatomer s  | 28.6764706   | 23 | 30 | 23 | 138.3 | 7.66  | 479  | 23 |
| O75694     | Nuclear por | 18.9791517   | 18 | 25 | 18 | 155.1 | 6.16  | 505  | 18 |
| B7Z596     | Tropomyosin | 42.9090909   | 15 | 34 | 5  | 31.7  | 4.89  | 607  | 15 |
| P54136     | Arginine--  | 147.4242424  | 26 | 30 | 26 | 75.3  | 6.68  | 405  | 26 |
| P27695     | DNA-(apurin | 62.5786164   | 13 | 27 | 13 | 35.5  | 8.12  | 556  | 13 |
| P38159     | RNA-binding | 56.7774936   | 24 | 36 | 24 | 42.3  | 10.05 | 493  | 24 |
| B2R5W2     | Heterogene  | 47.9310345   | 16 | 35 | 5  | 31.9  | 5.24  | 780  | 16 |
| P29692     | Elongation  | 53.7366548   | 15 | 27 | 5  | 31.1  | 5.01  | 674  | 15 |
| P80723     | Brain acid  | 76.2114537   | 13 | 35 | 13 | 22.7  | 4.63  | 492  | 13 |
| AOA087WUT6 | Eukaryotic  | 23.6885246   | 21 | 29 | 21 | 138.6 | 5.58  | 493  | 21 |
| P55084     | Trifunction | 59.7046414   | 22 | 30 | 22 | 51.3  | 9.41  | 420  | 22 |
| P49792     | E3 SUMO-pr  | 16.8114144   | 34 | 49 | 34 | 358   | 6.2   | 562  | 34 |
| Q92945     | Far upstre  | 41.7721519   | 20 | 33 | 16 | 73.1  | 7.3   | 646  | 20 |
| Q9UHD1     | Cysteine ar | 62.6506024   | 19 | 27 | 19 | 37.5  | 7.87  | 452  | 19 |
| R4GNH3     | 26S protea  | 52.9550827   | 19 | 33 | 19 | 47.3  | 5.22  | 594  | 19 |
| Q5QNW6     | Histone H2  | 67.4603175   | 13 | 69 | 1  | 13.9  | 10.32 | 1663 | 13 |
| P17858     | ATP-depend  | 30.3846154   | 15 | 19 | 12 | 85    | 7.5   | 609  | 15 |
| A8K7D9     | Importin s  | 41.5879017   | 18 | 40 | 18 | 57.8  | 5.4   | 900  | 18 |
| Q99497     | Protein DJ  | -78.8359788  | 18 | 28 | 18 | 19.9  | 6.79  | 425  | 18 |
| AOA024QZZ7 | Histone H2  | 67.4603175   | 13 | 69 | 1  | 13.9  | 10.32 | 1698 | 13 |
| B2R7T8     | cDNA, FLJ9  | 65.4411765   | 18 | 29 | 18 | 30.6  | 6     | 597  | 18 |
| Q15717     | ELAV-like   | 56.4417178   | 15 | 25 | 15 | 36.1  | 9.17  | 439  | 15 |
| AOA024R2Z6 | Guanine nuc | 44.320298    | 23 | 29 | 23 | 60.5  | 8.79  | 432  | 23 |
| A6NNZ2     | Tubulin bet | 26.1261261   | 12 | 81 | 1  | 49.5  | 4.86  | 1260 | 12 |
| C9JUM1     | Actin, cyto | 78.7878788   | 10 | 68 | 1  | 11    | 5.74  | 1340 | 10 |
| O75874     | Isocitrate  | 56.763285    | 19 | 29 | 19 | 46.6  | 7.01  | 462  | 19 |
| AOA140VJY2 | Testicular  | 30.2556818   | 17 | 29 | 16 | 80.1  | 8.21  | 738  | 17 |
| P27824     | Calnexin O  | 31.0810811   | 15 | 28 | 15 | 67.5  | 4.6   | 454  | 15 |
| P05141     | ADP/ATP tr  | 57.0469799   | 22 | 43 | 7  | 32.8  | 9.69  | 689  | 22 |
| Q9Y3I0     | tRNA-splic  | 49.9009901   | 18 | 27 | 18 | 55.2  | 7.23  | 356  | 18 |
| Q6UWP8     | Suprabasin  | 40.1694915   | 12 | 22 | 12 | 60.5  | 7.01  | 476  | 12 |
| P14324     | Farnesyl p  | 30.071599    | 9  | 18 | 9  | 48.2  | 6.15  | 478  | 9  |
| O14980     | Exportin-1  | 27.1708683   | 22 | 27 | 22 | 123.3 | 6.06  | 495  | 22 |
| B2R825     | Alpha-1,4   | 36.0094451   | 27 | 36 | 23 | 97    | 7.3   | 475  | 27 |
| P04843     | Dolichyl-d  | 41.3509061   | 20 | 36 | 20 | 68.5  | 6.38  | 586  | 20 |
| Q15084     | Protein dis | 45.2272727   | 14 | 32 | 14 | 48.1  | 5.08  | 625  | 14 |
| B0YJ88     | Radixin OS  | 35.1629503   | 25 | 53 | 11 | 68.5  | 6.37  | 612  | 25 |
| I6L9F7     | Histone H2  | 61.5942029   | 13 | 68 | 1  | 15.1  | 10.24 | 1644 | 13 |
| P16152     | Carbonyl r  | 70.7581227   | 18 | 28 | 18 | 30.4  | 8.32  | 691  | 18 |
| B0QY89     | Eukaryotic  | 34.431631    | 19 | 32 | 19 | 70.9  | 6.65  | 613  | 19 |
| P52209     | 6-phosphog  | 59.4202899   | 18 | 31 | 18 | 53.1  | 7.23  | 448  | 18 |
| H7C2I1     | Protein ar  | 48.787062    | 16 | 24 | 8  | 42.4  | 5.35  | 457  | 16 |
| P31947     | 14-3-3 pro  | 62.9032258   | 16 | 32 | 12 | 27.8  | 4.74  | 562  | 16 |
| P08708     | 40S riboso  | 61.4814815   | 9  | 27 | 9  | 15.5  | 9.85  | 407  | 9  |
| O75367     | Core histor | 43.0107527   | 11 | 24 | 11 | 39.6  | 9.79  | 459  | 11 |
| Q14157     | Ubiquitin-  | 19.6872125   | 15 | 21 | 15 | 114.5 | 7.11  | 479  | 15 |
| P60900     | Proteasome  | 71.9512195   | 16 | 28 | 16 | 27.4  | 6.76  | 585  | 16 |
| AOA0S4T1M1 | MHC class   | 58.4699454   | 15 | 28 | 3  | 40.9  | 6.3   | 563  | 15 |
| AOA140VK70 | Testis sec  | 52.6558891   | 21 | 29 | 21 | 48.6  | 5.95  | 649  | 21 |
| O95373     | Importin-7  | 20.4238921   | 19 | 26 | 18 | 119.4 | 4.82  | 369  | 19 |
| Q15046     | Lysine--tr  | 46.2311558   | 25 | 39 | 25 | 68    | 6.35  | 466  | 25 |
| AOA140VJW5 | Testicular  | 51.2974052   | 21 | 26 | 21 | 57.1  | 6.55  | 591  | 21 |
| AOA024R4Q8 | Ribosomal   | 58.3333333   | 15 | 40 | 15 | 22.9  | 9.72  | 845  | 15 |
| V9HW29     | Kinesin-li  | 28.9719626   | 18 | 24 | 18 | 109.6 | 6.51  | 400  | 18 |
| F8VZX2     | Poly(rC)-   | bi59.8130841 | 11 | 29 | 1  | 33.8  | 8.24  | 665  | 11 |

|            |             |              |    |    |    |       |       |      |    |
|------------|-------------|--------------|----|----|----|-------|-------|------|----|
| P36952     | Serpin B5 ( | 52.8         | 16 | 23 | 16 | 42.1  | 6.05  | 595  | 16 |
| Q13200     | 26S proteas | 29.185022    | 22 | 30 | 22 | 100.1 | 5.2   | 542  | 22 |
| Q14240     | Eukaryotic  | 43.2432432   | 16 | 30 | 4  | 46.4  | 5.48  | 682  | 16 |
| P13804     | Electron tr | 52.5525526   | 16 | 22 | 16 | 35.1  | 8.38  | 565  | 16 |
| AOA0S2Z404 | Regulator c | 44.0265487   | 13 | 23 | 13 | 48.1  | 8.16  | 489  | 13 |
| P42167     | Lamina-ass  | 44.2731278   | 16 | 24 | 7  | 50.6  | 9.38  | 488  | 16 |
| Q9Y3F4     | Serine-thre | 64.2857143   | 16 | 25 | 16 | 38.4  | 5.12  | 523  | 16 |
| E9KL48     | Epididymis  | 40.1433692   | 17 | 26 | 17 | 61.4  | 7.8   | 434  | 17 |
| Q6FHX6     | Flap endom  | 49.7368421   | 16 | 23 | 16 | 42.6  | 8.62  | 407  | 16 |
| Q8TCD0     | Uncharacter | 41.8410042   | 7  | 26 | 1  | 26.2  | 8.06  | 643  | 7  |
| Q15366     | Poly(rC)-bi | 56.9863014   | 11 | 29 | 1  | 38.6  | 6.79  | 665  | 11 |
| P40763     | Signal tran | 32.8571429   | 17 | 25 | 17 | 88    | 6.3   | 372  | 17 |
| P62136     | Serine/thre | 52.4242424   | 14 | 26 | 4  | 37.5  | 6.33  | 416  | 14 |
| P00505     | Aspartate ε | 51.3953488   | 17 | 23 | 17 | 47.5  | 9.01  | 404  | 17 |
| P55060     | Exportin-2  | 24.8197734   | 23 | 29 | 23 | 110.3 | 5.77  | 634  | 23 |
| P09622     | Dihydrolip  | 43.2220039   | 18 | 27 | 18 | 54.1  | 7.85  | 474  | 18 |
| P62263     | 40S ribosom | 71.5231788   | 11 | 34 | 11 | 16.3  | 10.05 | 550  | 11 |
| P40925     | Malate dehy | 47.3053892   | 15 | 28 | 15 | 36.4  | 7.36  | 751  | 15 |
| Q16778     | Histone H2I | 67.4603175   | 12 | 62 | 0  | 13.9  | 10.32 | 1525 | 12 |
| P37802     | Transgelin  | 81.9095477   | 20 | 37 | 20 | 22.4  | 8.25  | 526  | 20 |
| P33778     | Histone H2I | 67.4603175   | 12 | 62 | 1  | 13.9  | 10.32 | 1511 | 12 |
| 000299     | Chloride ir | 64.3153527   | 15 | 28 | 15 | 26.9  | 5.17  | 590  | 15 |
| P36873     | Serine/thre | 50.1547988   | 14 | 26 | 3  | 37    | 6.54  | 411  | 14 |
| Q14683     | Structural  | 28.8726683   | 28 | 31 | 28 | 143.1 | 7.64  | 489  | 28 |
| AOA024R814 | Ribosomal r | 58.3011583   | 20 | 47 | 20 | 30.4  | 10.71 | 632  | 20 |
| P46060     | Ran GTPase  | 45.1448041   | 17 | 27 | 17 | 63.5  | 4.68  | 601  | 17 |
| D9IAI1     | Epididymis  | 81.2834225   | 10 | 23 | 6  | 21    | 7.53  | 449  | 10 |
| P50454     | Serpin HI   | (46.8899522  | 15 | 21 | 15 | 46.4  | 8.69  | 396  | 15 |
| Q53Z07     | NPC-A-16    | 0572.9166667 | 13 | 33 | 13 | 21.9  | 9.95  | 249  | 13 |
| AOA024R7B7 | CDC37 cell  | 41.7989418   | 15 | 25 | 15 | 44.4  | 5.25  | 430  | 15 |
| Q92499     | ATP-depend  | 35.4054054   | 19 | 26 | 19 | 82.4  | 7.23  | 289  | 19 |
| Q6P5S8     | IGK@ protei | 40.6779661   | 7  | 26 | 1  | 25.8  | 6.33  | 614  | 7  |
| Q92688     | Acidic leuc | 32.6693227   | 13 | 35 | 7  | 28.8  | 4.06  | 576  | 13 |
| AOA140VK56 | Transaldol  | ε49.2581602  | 19 | 32 | 19 | 37.5  | 6.81  | 791  | 19 |
| P25398     | 40S ribosom | 65.1515152   | 11 | 25 | 11 | 14.5  | 7.21  | 538  | 11 |
| AOA191W087 | MHC class I | 53.3149171   | 15 | 31 | 4  | 40.4  | 6.15  | 453  | 15 |
| P55786     | Puromycin-ε | 29.2709467   | 21 | 28 | 21 | 103.2 | 5.72  | 312  | 21 |
| P31153     | S-adenosyl  | 49.1139241   | 19 | 36 | 19 | 43.6  | 6.48  | 511  | 19 |
| Q9BY44     | Eukaryotic  | 48.3760684   | 18 | 26 | 18 | 64.9  | 8.87  | 377  | 18 |
| 060814     | Histone H2I | 67.4603175   | 12 | 65 | 1  | 13.9  | 10.32 | 1616 | 12 |
| B2R9S4     | cDNA, FLJ9  | ε60.6321839  | 17 | 31 | 17 | 38.5  | 6.37  | 621  | 17 |
| Q14247     | Src substr  | ε39.6363636  | 18 | 23 | 18 | 61.5  | 5.4   | 365  | 18 |
| P50579     | Methionine  | 40.7949791   | 12 | 21 | 12 | 52.9  | 5.82  | 243  | 12 |
| I3L2B0     | Clustered n | 23.7055016   | 22 | 25 | 4  | 138.1 | 6.04  | 417  | 22 |
| Q9Y4L1     | Hypoxia up  | 28.7287287   | 18 | 24 | 18 | 111.3 | 5.22  | 528  | 18 |
| P55265     | Double-str  | ε21.37031    | 21 | 26 | 21 | 136   | 8.65  | 419  | 21 |
| Q12788     | Transducin  | 38.1188119   | 20 | 21 | 20 | 89    | 6.9   | 493  | 20 |
| AOA0A6YYL6 | Protein RPI | 46.9298246   | 12 | 33 | 12 | 26.4  | 10.1  | 266  | 12 |
| P67775     | Serine/thre | 54.368932    | 14 | 19 | 3  | 35.6  | 5.54  | 303  | 14 |
| V9HVY1     | Epididymis  | 50.305499    | 15 | 19 | 15 | 55.9  | 8.27  | 410  | 15 |
| P08758     | Annexin A5  | 55.625       | 18 | 27 | 18 | 35.9  | 5.05  | 595  | 18 |
| P20042     | Eukaryotic  | 44.1441441   | 17 | 26 | 17 | 38.4  | 5.8   | 486  | 17 |
| B3KX96     | cDNA FLJ45  | (39.2491468  | 12 | 28 | 1  | 32.3  | 5.14  | 717  | 12 |
| A2A3R6     | 40S ribosom | 34.1365462   | 13 | 26 | 13 | 28.7  | 10.84 | 586  | 13 |
| Q6N030     | Uncharacter | 24.1312741   | 10 | 26 | 4  | 57    | 8.05  | 520  | 10 |
| AOA024R056 | Guanine nuc | 55           | 12 | 18 | 6  | 37.4  | 6     | 525  | 12 |
| 043242     | 26S proteas | 40.6367041   | 19 | 25 | 19 | 60.9  | 8.44  | 449  | 19 |
| Q16719     | Kynureninas | 41.7204301   | 14 | 23 | 14 | 52.3  | 7.03  | 326  | 14 |
| P61981     | 14-3-3 prot | 65.5870445   | 17 | 30 | 12 | 28.3  | 4.89  | 409  | 17 |
| Q549N0     | Cofilin 2   | 86.1445783   | 15 | 28 | 7  | 18.7  | 7.88  | 560  | 15 |
| P27694     | Replicatio  | 34.7402597   | 17 | 23 | 17 | 68.1  | 7.21  | 308  | 17 |
| AOA024RA52 | Proteasome  | 64.5299145   | 12 | 20 | 12 | 25.9  | 7.43  | 580  | 12 |
| Q15019     | Septin-2    | 0560.1108033 | 15 | 19 | 15 | 41.5  | 6.6   | 337  | 15 |
| B2RCM2     | cDNA, FLJ9  | ε25.255102   | 19 | 24 | 19 | 134.4 | 7.2   | 285  | 19 |
| P11387     | DNA topois  | 31.503268    | 20 | 27 | 20 | 90.7  | 9.31  | 322  | 20 |
| AOA024RDF6 | Heterogene  | ε23.3333333  | 12 | 30 | 9  | 46.4  | 9.57  | 489  | 12 |
| Q09028     | Histone-bir | 50.5882353   | 14 | 26 | 9  | 47.6  | 4.89  | 317  | 14 |
| V9HW04     | Serine/thre | 56.2691131   | 14 | 24 | 4  | 37.2  | 6.19  | 369  | 14 |
| Q13619     | Cullin-4A   | (38.3399209  | 20 | 27 | 15 | 87.6  | 8.13  | 387  | 20 |
| P61106     | Ras-relate  | ε82.7906977  | 14 | 22 | 12 | 23.9  | 6.21  | 378  | 14 |
| P15880     | 40S ribosom | 51.8771331   | 18 | 30 | 18 | 31.3  | 10.24 | 456  | 18 |
| P32004     | Neural cell | 120.2863962  | 17 | 22 | 17 | 139.9 | 6.24  | 451  | 17 |
| Q9Y617     | Phosphoseri | 49.4594595   | 15 | 24 | 15 | 40.4  | 7.66  | 585  | 15 |
| V9HW08     | Epididymis  | 67.1568627   | 13 | 30 | 13 | 23.2  | 5.11  | 400  | 13 |
| Q8NBS9     | Thioredoxin | 32.8703704   | 12 | 20 | 12 | 47.6  | 5.97  | 436  | 12 |
| Q92900     | Regulator c | 27.8122232   | 22 | 27 | 22 | 124.3 | 6.61  | 411  | 22 |
| Q5VXV3     | SET OS=Hom  | ε37.2413793  | 12 | 28 | 12 | 33.5  | 4.32  | 298  | 12 |

|            |             |             |    |    |    |       |       |      |    |
|------------|-------------|-------------|----|----|----|-------|-------|------|----|
| P52788     | Spermine sy | 57.9234973  | 12 | 21 | 11 | 41.2  | 5.02  | 225  | 12 |
| O60437     | Periplakin  | 17.1981777  | 22 | 24 | 22 | 204.6 | 5.6   | 338  | 22 |
| P26583     | High mobili | 49.7607656  | 14 | 29 | 9  | 24    | 7.81  | 370  | 14 |
| B2R4C0     | 60S ribosom | 68.75       | 16 | 32 | 16 | 20.7  | 10.71 | 583  | 16 |
| A2A274     | Aconitate I | 30.310559   | 17 | 20 | 17 | 87.8  | 7.37  | 388  | 17 |
| P06702     | Protein S1  | (79.8245614 | 11 | 36 | 11 | 13.2  | 6.13  | 600  | 11 |
| Q99460     | 26S proteas | 27.3871983  | 18 | 24 | 18 | 105.8 | 5.39  | 454  | 18 |
| Q562R1     | Beta-actin- | 28.7234043  | 15 | 78 | 5  | 42    | 5.59  | 1292 | 15 |
| P15170     | Eukaryotic  | 43.4869739  | 20 | 31 | 10 | 55.7  | 5.62  | 455  | 20 |
| O15143     | Actin-relat | 59.9462366  | 16 | 21 | 15 | 40.9  | 8.35  | 407  | 16 |
| AOAOC4DGG9 | Chromodomai | 14.2488384  | 19 | 22 | 15 | 220.3 | 6.02  | 390  | 19 |
| P67809     | Nuclease-sc | 53.0864198  | 13 | 25 | 7  | 35.9  | 9.88  | 297  | 13 |
| A8K9K6     | cDNA FLJ76  | 37.8787879  | 16 | 24 | 16 | 65.9  | 9.23  | 416  | 16 |
| P62879     | Guanine nuc | 61.1764706  | 13 | 20 | 6  | 37.3  | 6     | 464  | 13 |
| P08237     | ATP-depend  | 31.9230769  | 18 | 21 | 15 | 85.1  | 7.99  | 520  | 18 |
| P09382     | Galectin-1  | 74.8148148  | 11 | 23 | 11 | 14.7  | 5.5   | 491  | 11 |
| AOAOS2Z2Z6 | Annexin (F1 | 42.4962853  | 22 | 27 | 22 | 75.8  | 5.6   | 341  | 22 |
| P35606     | Coatomer st | 35.8719647  | 19 | 23 | 19 | 102.4 | 5.27  | 293  | 19 |
| P45880     | Voltage-dep | 58.1632653  | 13 | 27 | 13 | 31.5  | 7.56  | 581  | 13 |
| Q9H0A0     | RNA cytidir | 25.9512195  | 20 | 25 | 11 | 115.7 | 8.27  | 382  | 20 |
| P26373     | 60S ribosom | 47.8672986  | 14 | 35 | 14 | 24.2  | 11.65 | 613  | 14 |
| P21291     | Cysteine ar | 66.3212435  | 10 | 17 | 10 | 20.6  | 8.57  | 389  | 10 |
| AOAOS2Z3L2 | ATPase Ca+  | 22.2648752  | 17 | 20 | 17 | 114.7 | 5.34  | 429  | 17 |
| G8JLA2     | Myosin ligl | 78.9473684  | 8  | 22 | 1  | 17.1  | 4.55  | 532  | 8  |
| AOA024RIK7 | Tyrosine 3- | 49.5934959  | 14 | 24 | 10 | 28.2  | 4.84  | 460  | 14 |
| Q9BYX7     | Putative be | 24.8        | 9  | 60 | 2  | 42    | 6.33  | 1236 | 9  |
| Q9Y2W1     | Thyroid hor | 23.2460733  | 17 | 32 | 17 | 108.6 | 10.15 | 312  | 17 |
| P38117     | Electron tr | 56.8627451  | 16 | 25 | 16 | 27.8  | 8.1   | 589  | 16 |
| B2R6F3     | Splicing fe | 51.2195122  | 10 | 36 | 10 | 19.3  | 11.65 | 390  | 10 |
| AOA140VK41 | Testicular  | 49.2211838  | 13 | 23 | 8  | 35    | 6.46  | 335  | 13 |
| O43776     | Asparagine- | 34.6715328  | 16 | 21 | 16 | 62.9  | 6.25  | 336  | 16 |
| P23381     | Tryptophan- | 40.1273885  | 16 | 27 | 16 | 53.1  | 6.23  | 346  | 16 |
| Q13835     | Plakophilin | 30.789826   | 16 | 20 | 16 | 82.8  | 9.13  | 570  | 16 |
| A8K401     | Prohibitin, | 76.1029412  | 16 | 23 | 16 | 29.8  | 5.76  | 433  | 16 |
| AOA024RAI1 | ARP3 actin- | 50          | 16 | 24 | 16 | 47.3  | 5.88  | 258  | 16 |
| P22695     | Cytochrome  | 39.2935982  | 12 | 22 | 12 | 48.4  | 8.63  | 371  | 12 |
| AOA140VKA6 | Testis secr | 34.1463415  | 13 | 21 | 13 | 41.3  | 5.27  | 467  | 13 |
| Q13151     | Heterogene  | 55.7377049  | 15 | 20 | 14 | 30.8  | 9.29  | 366  | 15 |
| Q96PK6     | RNA-binding | 29.7458894  | 17 | 24 | 17 | 69.4  | 9.67  | 533  | 17 |
| P12429     | Annexin A3  | 44.5820433  | 14 | 19 | 14 | 36.4  | 5.92  | 496  | 14 |
| O75390     | Citrate syr | 32.832618   | 11 | 23 | 11 | 51.7  | 8.32  | 451  | 11 |
| P49189     | 4-trimethyl | 45.951417   | 16 | 22 | 16 | 53.8  | 5.87  | 311  | 16 |
| P61160     | Actin-relat | 41.6243655  | 15 | 21 | 14 | 44.7  | 6.74  | 473  | 15 |
| Q59HE3     | Calpastatin | 30.3571429  | 14 | 20 | 1  | 84.2  | 5.35  | 271  | 14 |
| P06396     | Gelsolin O  | 35.0383632  | 16 | 21 | 16 | 85.6  | 6.28  | 349  | 16 |
| K7ELL7     | Glucosidase | 28.411215   | 15 | 23 | 15 | 60.2  | 4.41  | 472  | 15 |
| Q9Y266     | Nuclear mi  | 38.0664653  | 16 | 27 | 16 | 38.2  | 5.38  | 338  | 16 |
| AOAOC4DGB5 | Calpastatin | 31.5649867  | 14 | 20 | 1  | 81    | 5.1   | 236  | 14 |
| O95433     | Activator c | 48.816568   | 13 | 20 | 13 | 38.3  | 5.53  | 248  | 13 |
| P30084     | Enoyl-CoA   | 159.6551724 | 14 | 19 | 14 | 31.4  | 8.07  | 400  | 14 |
| Q9UHX1     | Poly(U)-bir | 39.7137746  | 15 | 23 | 15 | 59.8  | 5.29  | 240  | 15 |
| Q86VP6     | Cullin-ass  | 24.1463415  | 21 | 27 | 21 | 136.3 | 5.78  | 274  | 21 |
| X5DR09     | General tr  | 25.5511022  | 21 | 30 | 21 | 112.3 | 6.39  | 306  | 21 |
| P12004     | Proliferati | 67.816092   | 13 | 21 | 13 | 28.8  | 4.69  | 406  | 13 |
| Q9H0U4     | Ras-relate  | 82.5870647  | 15 | 19 | 8  | 22.2  | 5.73  | 463  | 15 |
| E5KMI6     | Lon proteas | 26.0688217  | 20 | 23 | 20 | 106.4 | 6.39  | 258  | 20 |
| Q6MZU6     | Putative ur | 29.7413793  | 10 | 24 | 6  | 51.1  | 7.71  | 281  | 10 |
| P26358     | DNA (cytosi | 16.769802   | 24 | 25 | 24 | 183.1 | 7.75  | 311  | 24 |
| X5D8S6     | Adenylosucc | 47.7272727  | 15 | 18 | 15 | 54.9  | 7.11  | 262  | 15 |
| F4ZW62     | NF45 OS=Hon | 50.5128205  | 15 | 24 | 15 | 43    | 5.26  | 518  | 15 |
| Q00688     | Peptidyl-pi | 59.375      | 13 | 21 | 13 | 25.2  | 9.28  | 258  | 13 |
| P62277     | 40S ribosom | 41.7218543  | 11 | 29 | 11 | 17.2  | 10.54 | 456  | 11 |
| P05109     | Protein S1  | (60.2150538 | 12 | 35 | 12 | 10.8  | 7.03  | 694  | 12 |
| P52907     | F-actin-cap | 63.986014   | 11 | 20 | 9  | 32.9  | 5.69  | 328  | 11 |
| P62750     | 60S ribosom | 58.974359   | 14 | 31 | 14 | 17.7  | 10.45 | 449  | 14 |
| Q5T4S7     | E3 ubiquiti | 7.37024889  | 22 | 24 | 22 | 573.5 | 6.04  | 248  | 22 |
| Q6IAV3     | Eukaryotic  | 84.9557522  | 8  | 13 | 5  | 12.7  | 7.44  | 277  | 8  |
| P30050     | 60S ribosom | 64.2424242  | 9  | 25 | 9  | 17.8  | 9.42  | 588  | 9  |
| Q6FGH9     | DNCL1 prote | 52.8089888  | 7  | 18 | 7  | 10.4  | 7.4   | 458  | 7  |
| P84098     | 60S ribosom | 41.8367347  | 14 | 27 | 14 | 23.5  | 11.47 | 619  | 14 |
| Q59G24     | Activated F | 68.6567164  | 11 | 18 | 11 | 15.1  | 9.38  | 339  | 11 |
| P54819     | Adenylate   | 177.4058577 | 15 | 23 | 15 | 26.5  | 7.81  | 507  | 15 |
| B2RE46     | cDNA, FLJ9  | (25.5150555 | 10 | 15 | 10 | 69.3  | 5.78  | 168  | 10 |
| Q53Y97     | Thymidylat  | 42.4920128  | 10 | 19 | 10 | 35.7  | 7.01  | 331  | 10 |
| O95757     | Heat shock  | 27.5327771  | 18 | 23 | 12 | 94.5  | 5.88  | 532  | 18 |
| AOA024R4E5 | High densit | 21.1356467  | 21 | 24 | 21 | 141.4 | 6.87  | 266  | 21 |
| H7BY55     | Complement  | 30.5454545  | 15 | 27 | 15 | 58.9  | 8.78  | 300  | 15 |

|            |                        |              |    |    |    |       |       |     |    |
|------------|------------------------|--------------|----|----|----|-------|-------|-----|----|
| Q15459     | Splicing factor        | 27.112232    | 17 | 22 | 16 | 88.8  | 5.22  | 359 | 17 |
| Q15691     | Microtubule            | 60.4477612   | 15 | 21 | 15 | 30    | 5.14  | 319 | 15 |
| P35527     | Keratin, type 42       | 6966292      | 13 | 17 | 13 | 62    | 5.24  | 395 | 13 |
| P62195     | 26S proteasome         | 47.2906404   | 13 | 19 | 12 | 45.6  | 7.55  | 411 | 13 |
| F8W727     | 60S ribosome           | 49.0196078   | 10 | 24 | 10 | 18    | 10.59 | 439 | 10 |
| P58546     | Myotrophin             | 91.5254237   | 6  | 14 | 6  | 12.9  | 5.52  | 201 | 6  |
| Q8N1F7     | Nuclear pore           | 34.6764347   | 22 | 24 | 22 | 93.4  | 5.72  | 370 | 22 |
| Q14444     | Caprin-1               | 0524.5416079 | 14 | 19 | 14 | 78.3  | 5.25  | 267 | 14 |
| Q549M8     | CLE7 OS=Homo           | 65.5737705   | 14 | 21 | 14 | 28.1  | 6.65  | 351 | 14 |
| Q96AG4     | Leucine-rich           | 56.3517915   | 13 | 19 | 13 | 34.9  | 9.57  | 309 | 13 |
| E9PAV3     | Nascent pol            | 2.1174206    | 8  | 15 | 8  | 205.3 | 9.58  | 379 | 8  |
| A0A1C7CYX9 | Dihydropyridin         | 24.8153619   | 11 | 16 | 11 | 73.5  | 6.35  | 439 | 11 |
| AOA0S4T3F5 | MHC class I            | 42.8961749   | 11 | 23 | 2  | 40.9  | 7.2   | 386 | 11 |
| 043684     | Mitotic chaperone      | 67.3780488   | 17 | 32 | 17 | 37.1  | 6.84  | 268 | 17 |
| Q53GG0     | Epithelial             | 28.0632411   | 16 | 20 | 16 | 85.2  | 6.84  | 314 | 16 |
| MOQZM1     | Heterogeneous          | 61.618799    | 18 | 25 | 1  | 40    | 6.73  | 384 | 18 |
| P15531     | Nucleoside             | 70.3947368   | 10 | 23 | 1  | 17.1  | 6.19  | 443 | 10 |
| P62280     | 40S ribosome           | 70.8860759   | 20 | 36 | 20 | 18.4  | 10.3  | 395 | 20 |
| Q2NL82     | Pre-rRNA-p19           | 29.8507463   | 19 | 30 | 19 | 91.8  | 7.42  | 236 | 19 |
| J3QQ67     | 60S ribosome           | 44.7368421   | 10 | 23 | 10 | 21.8  | 11.72 | 428 | 10 |
| 000148     | ATP-dependent          | 46.6042155   | 17 | 27 | 4  | 49.1  | 5.68  | 361 | 17 |
| P55795     | Heterogeneous          | 37.6391982   | 14 | 30 | 7  | 49.2  | 6.3   | 485 | 14 |
| P42166     | Lamina-associated      | 27.9538905   | 14 | 19 | 5  | 75.4  | 7.66  | 334 | 14 |
| A0A0C4DG89 | Probable A121          | 3178295      | 17 | 20 | 17 | 117.4 | 9.29  | 310 | 17 |
| Q9Y2T3     | Guanine deaminase      | 44.2731278   | 13 | 17 | 13 | 51    | 5.68  | 328 | 13 |
| P25786     | Proteasome             | 69.2015209   | 12 | 24 | 12 | 29.5  | 6.61  | 359 | 12 |
| B3KRM2     | Serine/threonine       | 48.8673139   | 12 | 15 | 1  | 35.5  | 5.43  | 220 | 12 |
| Q7Z2W4     | Zinc finger            | 25.4988914   | 16 | 24 | 16 | 101.4 | 8.4   | 404 | 16 |
| P61586     | Transforming           | 67.8756477   | 13 | 27 | 4  | 21.8  | 6.1   | 375 | 13 |
| S4R3H4     | Apoptotic cleavage     | 16.5237724   | 17 | 23 | 16 | 145.4 | 6     | 239 | 17 |
| P35221     | Catenin alpha 1        | 28.3664459   | 16 | 16 | 16 | 100   | 6.29  | 297 | 16 |
| Q12965     | Unconventional         | 21.0288809   | 19 | 23 | 19 | 127   | 8.92  | 278 | 19 |
| P62906     | 60S ribosome           | 44.2396313   | 10 | 25 | 10 | 24.8  | 9.94  | 432 | 10 |
| Q12874     | Splicing factor        | 33.7325349   | 12 | 18 | 12 | 58.8  | 5.38  | 309 | 12 |
| E9PL71     | Elongation factor      | 49.197861    | 11 | 18 | 1  | 20.8  | 5.01  | 460 | 11 |
| Q59EA2     | Coronin (F)            | 38.3233533   | 15 | 23 | 15 | 56.3  | 8.19  | 292 | 15 |
| AOA140VJZ1 | Ubiquitinylated        | 25.2913753   | 16 | 21 | 16 | 95.7  | 5.03  | 241 | 16 |
| P60903     | Protein S100           | 67.0103093   | 8  | 28 | 8  | 11.2  | 7.37  | 318 | 8  |
| P52789     | Hexokinase-3           | 31.7339149   | 19 | 27 | 19 | 102.3 | 6.05  | 260 | 19 |
| Q59EF6     | Calpain 2              | 21.1248285   | 11 | 15 | 11 | 83.1  | 5.06  | 313 | 11 |
| Q99615     | DnaJ homolog           | 43.1174089   | 18 | 22 | 18 | 56.4  | 6.96  | 269 | 18 |
| Q14258     | E3 ubiquitin ligase    | 34.2857143   | 18 | 22 | 1  | 70.9  | 8.09  | 254 | 18 |
| B3KS98     | Eukaryotic             | 41.8032787   | 12 | 21 | 12 | 41.6  | 7.33  | 377 | 12 |
| P62244     | 40S ribosome           | 69.2307692   | 12 | 21 | 7  | 14.8  | 10.13 | 344 | 12 |
| B2R665     | cDNA, FLJ927           | 8.8388278    | 15 | 21 | 15 | 59.2  | 4.36  | 267 | 15 |
| Q6N092     | Putative uridine       | 31.2138728   | 12 | 23 | 1  | 56.4  | 6.93  | 320 | 12 |
| P36871     | Phosphoglucose         | 38.2562278   | 15 | 16 | 15 | 61.4  | 6.76  | 307 | 15 |
| E7EPK1     | Septin-7               | 0533.180778  | 15 | 23 | 14 | 50.7  | 8.63  | 209 | 15 |
| P46776     | 60S ribosome           | 33.1081081   | 7  | 15 | 7  | 16.6  | 11    | 340 | 7  |
| P08559     | Pyruvate dehydrogenase | 44.6153846   | 14 | 22 | 14 | 43.3  | 8.06  | 277 | 14 |
| AOA087X2I1 | 26S proteasome         | 40.4466501   | 15 | 19 | 15 | 45.8  | 7.78  | 387 | 15 |
| 060264     | SWI/SNF-related        | 120.9125475  | 19 | 26 | 19 | 121.8 | 8.09  | 296 | 19 |
| AOA0U5PXQ9 | MHC class I            | 36.6120219   | 11 | 20 | 2  | 40.7  | 6.02  | 467 | 11 |
| Q9H4A4     | Aminopeptidase         | 36.9230769   | 17 | 19 | 17 | 72.5  | 5.74  | 247 | 17 |
| P62888     | 60S ribosome           | 58.2608696   | 7  | 21 | 6  | 12.8  | 9.63  | 522 | 7  |
| Q8TDN6     | Ribosome biogenesis    | 43.6260623   | 12 | 18 | 10 | 41.4  | 9.92  | 234 | 12 |
| Q9NYF8     | Bcl-2-associated       | 23.0434783   | 16 | 25 | 16 | 106.1 | 9.98  | 181 | 16 |
| Q9BQG0     | Myb-binding protein    | 17.6957831   | 22 | 29 | 21 | 148.8 | 9.28  | 240 | 22 |
| P35268     | 60S ribosome           | 68.75        | 9  | 25 | 9  | 14.8  | 9.19  | 658 | 9  |
| P16989     | Y-box binding          | 39.516129    | 13 | 23 | 2  | 40.1  | 9.77  | 293 | 13 |
| AOA060VD11 | MHC class I            | 30.3867403   | 9  | 22 | 1  | 40.6  | 6.3   | 355 | 9  |
| Q6MZW0     | Putative uridine       | 32.0158103   | 12 | 23 | 1  | 54.4  | 6.77  | 298 | 12 |
| 075153     | Clustered regular      | 19.1749427   | 19 | 21 | 1  | 146.6 | 6.13  | 309 | 19 |
| PODN79     | Cystathionine          | 38.6569873   | 13 | 19 | 13 | 60.5  | 6.65  | 222 | 13 |
| B2RBE5     | cDNA, FLJ928           | 17.55196     | 21 | 23 | 21 | 101.2 | 7.42  | 262 | 21 |
| AOA024RAV4 | Cold shock             | 45.2145215   | 12 | 22 | 1  | 31.9  | 9.66  | 296 | 12 |
| P62269     | 40S ribosome           | 70.3947368   | 19 | 28 | 19 | 17.7  | 10.99 | 543 | 19 |
| P11498     | Pyruvate carboxylase   | 17.5721562   | 15 | 16 | 15 | 129.6 | 6.84  | 353 | 15 |
| Q59ED7     | Putative uridine       | 29.0087464   | 15 | 16 | 15 | 77.7  | 5.64  | 278 | 15 |
| G3V1V0     | Myosin light chain     | 65.2173913   | 8  | 19 | 1  | 18    | 4.77  | 485 | 8  |
| Q12904     | Aminoacyl-tRNA         | 52.2435897   | 10 | 18 | 10 | 34.3  | 8.43  | 270 | 10 |
| V9HWA6     | Epididymis             | 57.5757576   | 11 | 19 | 8  | 18.5  | 7.85  | 353 | 11 |
| P43686     | 26S proteasome         | 49.2822967   | 14 | 21 | 14 | 47.3  | 5.21  | 216 | 14 |
| B2RDQ3     | cDNA, FLJ944           | 79.16667     | 14 | 21 | 13 | 33.7  | 11.25 | 242 | 14 |
| Q59EP1     | Annexin (F)            | 29.4117647   | 13 | 18 | 1  | 54.9  | 7.27  | 339 | 13 |
| AOA087X1W2 | Protein arginase       | 43.1578947   | 9  | 13 | 1  | 32.7  | 5.68  | 322 | 9  |
| AOA024RAM0 | Transporter            | 18.0400891   | 13 | 18 | 13 | 102.3 | 4.98  | 290 | 13 |

|            |             |             |           |    |    |    |       |       |     |    |
|------------|-------------|-------------|-----------|----|----|----|-------|-------|-----|----|
| Q5U0I6     | H. sapiens  | 1           | 56.097561 | 14 | 18 | 7  | 22.7  | 6.21  | 450 | 14 |
| AOA024RBES | Solute carr | 36.565097   |           | 14 | 25 | 14 | 39.9  | 9.36  | 357 | 14 |
| Q13344     | Fus-like pr | 26.1363636  |           | 10 | 17 | 9  | 53.3  | 9.42  | 300 | 10 |
| P20674     | Cytochrome  | 56.6666667  |           | 7  | 16 | 7  | 16.8  | 6.79  | 358 | 7  |
| 000425     | Insulin-li  | 35.7512953  |           | 16 | 20 | 15 | 63.7  | 8.87  | 366 | 16 |
| Q8TEQ6     | Gem-associ  | 14.1909814  |           | 14 | 17 | 14 | 168.5 | 6.62  | 296 | 14 |
| Q9UNM6     | 26S protea  | 55.0531915  |           | 18 | 23 | 18 | 42.9  | 5.81  | 322 | 18 |
| Q96QK1     | Vacuolar p  | 22.8643216  |           | 15 | 18 | 15 | 91.6  | 5.49  | 376 | 15 |
| P50995     | Annexin A1  | 129.1089109 |           | 13 | 18 | 1  | 54.4  | 7.65  | 329 | 13 |
| AOA0B4J2C3 | Translatior | 59.8984772  |           | 9  | 26 | 9  | 22.6  | 5.24  | 367 | 9  |
| P55809     | Succinyl-C  | 28.8461538  |           | 13 | 16 | 13 | 56.1  | 7.46  | 377 | 13 |
| Q93009     | Ubiquitin c | 17.3321234  |           | 13 | 16 | 13 | 128.2 | 5.55  | 235 | 13 |
| BOZBD0     | 40S riboso  | 64.8275862  |           | 12 | 25 | 12 | 16.1  | 10.32 | 473 | 12 |
| P28838     | Cytosol ami | 39.6917148  |           | 15 | 17 | 15 | 56.1  | 7.93  | 337 | 15 |
| Q53F64     | Heterogene  | 35.2409639  |           | 13 | 26 | 12 | 36    | 7.42  | 428 | 13 |
| Q96TA1     | Niban-like  | 32.4396783  |           | 15 | 22 | 15 | 84.1  | 6.19  | 173 | 15 |
| P25789     | Proteasome  | 65.5172414  |           | 13 | 18 | 13 | 29.5  | 7.72  | 427 | 13 |
| 075821     | Eukaryotic  | 53.125      |           | 15 | 23 | 15 | 35.6  | 6.13  | 211 | 15 |
| Q59GW6     | Acetyl-CoA  | 49.009901   |           | 12 | 18 | 12 | 42.1  | 7.4   | 232 | 12 |
| P52701     | DNA mismat  | 16.25       |           | 16 | 18 | 16 | 152.7 | 6.9   | 266 | 16 |
| AOA024R608 | Ribosomal   | 171.0526316 |           | 4  | 14 | 2  | 11.5  | 4.32  | 163 | 4  |
| Q9NSD9     | Phenylalani | 35.8234295  |           | 16 | 20 | 16 | 66.1  | 6.84  | 262 | 16 |
| AOA0G2JH68 | Protein di  | 20.6761006  |           | 18 | 18 | 18 | 141.3 | 5.39  | 201 | 18 |
| Q9NW13     | RNA-binding | 23.4519104  |           | 17 | 19 | 17 | 85.7  | 9.22  | 313 | 17 |
| E9PCR7     | 2-oxogluta  | 24.2774566  |           | 17 | 21 | 17 | 117.6 | 6.92  | 161 | 17 |
| Q9UHD8     | Septin-9    | 08.9078498  |           | 15 | 16 | 15 | 65.4  | 8.97  | 304 | 15 |
| P32320     | Cytidine de | 66.4383562  |           | 8  | 13 | 8  | 16.2  | 6.92  | 258 | 8  |
| P30520     | Adenylosucc | 38.377193   |           | 14 | 20 | 14 | 50.1  | 6.55  | 496 | 14 |
| P19623     | Spermidine  | 60.2649007  |           | 12 | 16 | 12 | 33.8  | 5.49  | 333 | 12 |
| 000231     | 26S protea  | 42.8909953  |           | 15 | 22 | 15 | 47.4  | 6.48  | 337 | 15 |
| P46783     | 40S riboso  | 58.7878788  |           | 12 | 22 | 11 | 18.9  | 10.15 | 443 | 12 |
| J3KTL2     | Serine/argi | 61.6600791  |           | 17 | 36 | 16 | 28.3  | 10.08 | 360 | 17 |
| AOA024R3J1 | Tripartite  | 28.5714286  |           | 16 | 20 | 16 | 65.8  | 7.15  | 330 | 16 |
| HOY7A7     | Calmodulin  | 58.8235294  |           | 8  | 19 | 7  | 20.7  | 4.36  | 607 | 8  |
| Q59ET0     | Glucan, bra | 23.7400531  |           | 10 | 14 | 10 | 86.1  | 6.93  | 253 | 10 |
| Q13011     | Delta(3,5)- | 46.6463415  |           | 12 | 17 | 12 | 35.8  | 8     | 370 | 12 |
| P00491     | Purine nucl | 68.8581315  |           | 11 | 14 | 11 | 32.1  | 6.95  | 313 | 11 |
| Q02413     | Desmoglein  | 18.8751192  |           | 10 | 12 | 10 | 113.7 | 5.03  | 289 | 10 |
| AOA024R2Q4 | Ribosomal   | 174.0588235 |           | 11 | 26 | 11 | 24.1  | 11.62 | 289 | 11 |
| Q01581     | Hydroxymet  | 40.1923077  |           | 11 | 17 | 11 | 57.3  | 5.41  | 202 | 11 |
| B2RD27     | cDNA, FLJ9  | 38.5802469  |           | 8  | 14 | 8  | 37    | 6.77  | 275 | 8  |
| Q99623     | Prohibitin  | 47.4916388  |           | 12 | 17 | 12 | 33.3  | 9.83  | 408 | 12 |
| Q5H9N4     | Putative ur | 55.4455446  |           | 14 | 20 | 12 | 34.8  | 8.95  | 332 | 14 |
| Q12792     | Twinfilin   | 142.8571429 |           | 13 | 17 | 10 | 40.3  | 6.96  | 250 | 13 |
| Q5T4U5     | Acyl-Coenz  | 35.4625551  |           | 12 | 16 | 12 | 50.2  | 7.8   | 238 | 12 |
| P49773     | Histidine   | 181.7460317 |           | 10 | 18 | 10 | 13.8  | 6.95  | 184 | 10 |
| Q15293     | Reticulocal | 34.1389728  |           | 7  | 12 | 7  | 38.9  | 5     | 256 | 7  |
| AOA024R1S8 | LIM and SH  | 69.7318008  |           | 15 | 25 | 15 | 29.7  | 7.05  | 285 | 15 |
| Q59GW5     | Tripartite  | 33.8509317  |           | 18 | 21 | 1  | 72.2  | 8.06  | 159 | 18 |
| Q8N163     | Cell cycle  | 22.6435536  |           | 14 | 16 | 13 | 102.8 | 5.22  | 325 | 14 |
| AOA087WYT3 | Prostaglanc | 34.1463415  |           | 7  | 16 | 7  | 19.1  | 4.55  | 234 | 7  |
| AOA140VJK1 | Testicular  | 50.1492537  |           | 13 | 15 | 13 | 37.4  | 5.39  | 197 | 13 |
| B2RBI2     | cDNA, FLJ9  | 30.6818182  |           | 9  | 13 | 9  | 39.9  | 4.53  | 418 | 9  |
| AOA140VKE1 | Testis tiss | 31.7907445  |           | 12 | 16 | 12 | 55.6  | 7.88  | 219 | 12 |
| P05556     | Integrin be | 19.5488722  |           | 12 | 21 | 12 | 88.4  | 5.39  | 379 | 12 |
| Q15942     | Zyxin OS=H  | 34.4405594  |           | 13 | 18 | 13 | 61.2  | 6.67  | 119 | 13 |
| V9HW91     | Epididymis  | 68.8405797  |           | 12 | 15 | 12 | 30.6  | 7.21  | 161 | 12 |
| 075396     | Vesicle-tr  | 52.0930233  |           | 11 | 16 | 11 | 24.6  | 6.92  | 354 | 11 |
| AOA0A0MRM9 | Nucleolar   | 25          |           | 18 | 26 | 18 | 74.6  | 9.47  | 310 | 18 |
| Q9Y383     | Putative R  | 31.6326531  |           | 12 | 21 | 6  | 46.5  | 10.01 | 311 | 12 |
| Q13045     | Protein fli | 13.3175729  |           | 13 | 18 | 13 | 144.7 | 6.05  | 330 | 13 |
| P26368     | Splicing f  | 34.7368421  |           | 10 | 17 | 10 | 53.5  | 9.09  | 143 | 10 |
| P42285     | Superkiller | 20.2495202  |           | 17 | 18 | 17 | 117.7 | 6.52  | 166 | 17 |
| Q8IYD1     | Eukaryotic  | 22.4522293  |           | 11 | 19 | 1  | 68.8  | 5.43  | 414 | 11 |
| 000151     | PDZ and LIM | 64.7416413  |           | 12 | 12 | 12 | 36    | 7.02  | 255 | 12 |
| P49721     | Proteasome  | 39.3034826  |           | 8  | 16 | 8  | 22.8  | 7.02  | 262 | 8  |
| Q29958     | HLA-C prote | 46.5189873  |           | 11 | 21 | 1  | 35.4  | 5.95  | 393 | 11 |
| 060832     | H/ACA ribor | 30.5447471  |           | 11 | 15 | 11 | 57.6  | 9.42  | 284 | 11 |
| B2RD79     | cDNA, FLJ9  | 43.1174089  |           | 14 | 18 | 14 | 56    | 5.3   | 270 | 14 |
| LOR849     | Alternative | 44.4329897  |           | 10 | 20 | 1  | 42.3  | 5.92  | 590 | 10 |
| Q27J81     | Inverted fc | 16.8935148  |           | 13 | 17 | 13 | 135.5 | 5.38  | 255 | 13 |
| V9HWH1     | Epididymis  | 32.1899736  |           | 10 | 15 | 9  | 42.7  | 6.28  | 211 | 10 |
| Q1KMD3     | Heterogene  | 24.6318608  |           | 11 | 14 | 11 | 85.1  | 4.91  | 343 | 11 |
| B3KY60     | cDNA FLJ16  | 27.9301746  |           | 15 | 17 | 15 | 92.2  | 8.18  | 429 | 15 |
| 000429     | Dynammin-1  | 125.1358696 |           | 14 | 16 | 14 | 81.8  | 6.81  | 275 | 14 |
| AOA140VK94 | RAN binding | 69.1542289  |           | 8  | 18 | 8  | 23.3  | 5.29  | 143 | 8  |
| 014744     | Protein arg | 31.2401884  |           | 15 | 25 | 15 | 72.6  | 6.29  | 181 | 15 |

|            |             |             |    |    |    |       |       |     |    |
|------------|-------------|-------------|----|----|----|-------|-------|-----|----|
| Q13247     | Serine/argi | 29.9418605  | 10 | 20 | 7  | 39.6  | 11.43 | 369 | 10 |
| V9HWI3     | Cathepsin I | 38.592233   | 10 | 15 | 10 | 44.5  | 6.54  | 221 | 10 |
| Q8IVT2     | Mitotic int | 38.7334315  | 16 | 20 | 16 | 75.3  | 6.83  | 310 | 16 |
| P60891     | Ribose-phos | 50.3144654  | 12 | 16 | 7  | 34.8  | 6.98  | 211 | 12 |
| Q15369     | Elongin-C   | (71.4285714 | 8  | 15 | 8  | 12.5  | 4.78  | 526 | 8  |
| Q9UHB9     | Signal recc | 22.4880383  | 10 | 14 | 10 | 70.7  | 8.56  | 353 | 10 |
| AOA140VJJ2 | S-formylglu | 33.6879433  | 8  | 13 | 8  | 31.4  | 7.02  | 286 | 8  |
| Q13185     | Chromobox   | 146.4480874 | 8  | 21 | 6  | 20.8  | 5.33  | 576 | 8  |
| Q96HE7     | ER01-like   | 142.7350427 | 13 | 15 | 13 | 54.4  | 5.68  | 240 | 13 |
| 095831     | Apoptosis-i | 28.0587276  | 13 | 15 | 13 | 66.9  | 8.95  | 240 | 13 |
| B2R983     | cDNA, FLJ9  | 53.526971   | 13 | 24 | 13 | 27.5  | 6.6   | 236 | 13 |
| Q9Y5M8     | Signal recc | 31.3653137  | 8  | 13 | 8  | 29.7  | 9.04  | 217 | 8  |
| X5DNM4     | Lactoylglu  | 51.0869565  | 8  | 22 | 8  | 20.8  | 5.31  | 294 | 8  |
| Q9UG63     | ATP-binding | 19.2616372  | 10 | 14 | 10 | 71.2  | 7.37  | 327 | 10 |
| P63313     | Thymosin b  | 84.0909091  | 7  | 24 | 7  | 5     | 5.36  | 479 | 7  |
| LOR5C4     | Alternative | 19.5067265  | 7  | 31 | 1  | 50.3  | 5.52  | 702 | 7  |
| Q9Y3E8     | CGI-150 pr  | 26.984127   | 11 | 14 | 11 | 55    | 8.7   | 238 | 11 |
| AOA1B0GW77 | Alpha-aminc | 32.8519856  | 13 | 15 | 13 | 60    | 8.18  | 288 | 13 |
| P28070     | Proteasome  | 37.1212121  | 7  | 13 | 7  | 29.2  | 5.97  | 288 | 7  |
| Q13085     | Acetyl-CoA  | 8.9940324   | 14 | 14 | 14 | 265.4 | 6.37  | 262 | 14 |
| AOA024R3W7 | Eukaryotic  | 48          | 9  | 16 | 9  | 24.7  | 4.67  | 243 | 9  |
| V9HWK0     | Signal recc | 31.8926975  | 16 | 17 | 16 | 74.6  | 9.26  | 237 | 16 |
| D6REX3     | Protein tra | 15.2677858  | 15 | 17 | 15 | 136.1 | 6.98  | 260 | 15 |
| Q9BSJ8     | Extended sy | 15.1268116  | 13 | 16 | 13 | 122.8 | 5.83  | 196 | 13 |
| J3KN16     | KIAA0368 O  | 11.502231   | 14 | 16 | 14 | 223.6 | 8.75  | 166 | 14 |
| Q9Y2X3     | Nucleolar   | 133.8374291 | 14 | 17 | 14 | 59.5  | 8.92  | 195 | 14 |
| P61289     | Proteasome  | 50.7874016  | 12 | 19 | 12 | 29.5  | 5.95  | 439 | 12 |
| 094925     | Glutaminase | 26.0089686  | 11 | 14 | 7  | 73.4  | 7.77  | 209 | 11 |
| V9HW12     | Epididymis  | 54.5454545  | 9  | 20 | 8  | 21.9  | 5.97  | 224 | 9  |
| B7ZLH8     | EVPL protei | 10.9975669  | 17 | 16 | 16 | 233.7 | 7.25  | 220 | 17 |
| Q15424     | Scaffold at | 22.7322404  | 16 | 20 | 9  | 102.6 | 5.47  | 118 | 16 |
| A8K3Q9     | cDNA FLJ76  | 40.2777778  | 10 | 19 | 4  | 23.4  | 10.93 | 362 | 10 |
| P11177     | Pyruvate de | 41.2256267  | 11 | 16 | 11 | 39.2  | 6.65  | 207 | 11 |
| P33316     | Deoxyuridir | 36.1111111  | 7  | 14 | 3  | 26.5  | 9.36  | 297 | 7  |
| Q96HC4     | PDZ and LIM | 34.7315436  | 15 | 20 | 15 | 63.9  | 8.21  | 189 | 15 |
| P62249     | 40S ribosom | 59.5890411  | 12 | 25 | 12 | 16.4  | 10.21 | 630 | 12 |
| Q6FGH5     | RPS21 prote | 77.1084337  | 7  | 15 | 7  | 9.1   | 8.5   | 494 | 7  |
| 095816     | BAG family  | 61.6113744  | 9  | 13 | 9  | 23.8  | 6.7   | 133 | 9  |
| AOA024QZS4 | Peptidyl-p  | 49.2753623  | 6  | 11 | 6  | 22    | 9.38  | 222 | 6  |
| AOA140VJX1 | Testicular  | 52.9274005  | 13 | 17 | 13 | 45.2  | 8.85  | 151 | 13 |
| B4DS05     | cDNA FLJ59  | 25.9067358  | 9  | 15 | 7  | 44.1  | 4.7   | 299 | 9  |
| Q5U5J2     | CSNK2A1 pr  | 42.5692695  | 11 | 13 | 10 | 45.9  | 7.96  | 163 | 11 |
| B4DRM3     | cDNA FLJ54  | 28.7337662  | 16 | 24 | 16 | 69.7  | 5.67  | 331 | 16 |
| P46087     | Probable 2  | 19.7044335  | 14 | 16 | 14 | 89.2  | 9.23  | 384 | 14 |
| 043865     | Adenosylhon | 32.0754717  | 11 | 15 | 9  | 58.9  | 6.89  | 250 | 11 |
| E9PB61     | THO comple  | 39.0151515  | 7  | 12 | 7  | 27.5  | 11.05 | 296 | 7  |
| B3KSH1     | Eukaryotic  | 33.0645161  | 11 | 15 | 11 | 39.1  | 5.45  | 197 | 11 |
| P43490     | Nicotinamic | 30.9572301  | 12 | 16 | 12 | 55.5  | 7.15  | 240 | 12 |
| P99999     | Cytochrome  | 59.047619   | 9  | 15 | 9  | 11.7  | 9.57  | 344 | 9  |
| P08621     | U1 small m  | 32.4942792  | 17 | 25 | 17 | 51.5  | 9.94  | 198 | 17 |
| P61019     | Ras-relatec | 50          | 9  | 11 | 9  | 23.5  | 6.54  | 291 | 9  |
| P51149     | Ras-relatec | 55.0724638  | 9  | 15 | 9  | 23.5  | 6.7   | 316 | 9  |
| AOA0S2Z569 | DAZ associ  | 34.6437346  | 9  | 15 | 8  | 43.4  | 8.56  | 292 | 9  |
| Q9UIG0     | Tyrosine-p  | 12.8792987  | 12 | 13 | 12 | 170.8 | 8.48  | 184 | 12 |
| Q6PKG0     | La-related  | 15.1459854  | 12 | 17 | 12 | 123.4 | 8.82  | 169 | 12 |
| 094776     | Metastasis- | 27.0958084  | 13 | 17 | 12 | 75    | 9.66  | 155 | 13 |
| AOA0S2Z489 | Proteasome  | 31.3596491  | 11 | 14 | 11 | 52.9  | 7.65  | 277 | 11 |
| V9HW63     | Epididymis  | 36.900369   | 7  | 15 | 5  | 30.5  | 6.29  | 205 | 7  |
| P53992     | Protein tra | 20.2010969  | 15 | 15 | 15 | 118.2 | 7.06  | 208 | 15 |
| C1KGA3     | MHC class I | 43.715847   | 10 | 19 | 1  | 40.7  | 7.44  | 290 | 10 |
| Q13561     | Dynactin st | 41.8952618  | 14 | 18 | 14 | 44.2  | 5.21  | 298 | 14 |
| V9HW35     | Epididymis  | 55.5555556  | 7  | 14 | 7  | 17    | 7.24  | 198 | 7  |
| Q15645     | Pachytene c | 33.7962963  | 11 | 13 | 11 | 48.5  | 6.09  | 285 | 11 |
| Q9NQW7     | Xaa-Pro ami | 30.6581059  | 13 | 15 | 13 | 69.9  | 5.67  | 168 | 13 |
| AOA140VK69 | Aspartate   | 36.5617433  | 10 | 13 | 10 | 46.2  | 7.01  | 195 | 10 |
| A8K5Y7     | cDNA FLJ78  | 13.6212625  | 13 | 13 | 13 | 136.2 | 5.9   | 272 | 13 |
| Q9Y2B0     | Protein car | 52.7472527  | 8  | 13 | 8  | 20.6  | 4.92  | 215 | 8  |
| P61163     | Alpha-centi | 42.8191489  | 10 | 16 | 6  | 42.6  | 6.64  | 222 | 10 |
| P46781     | 40S ribosom | 53.0927835  | 19 | 27 | 19 | 22.6  | 10.65 | 366 | 19 |
| Q14527     | Helicase-li | 17.1456888  | 11 | 15 | 11 | 113.9 | 8.6   | 240 | 11 |
| P35613     | Basigin OS  | 28.5714286  | 7  | 14 | 7  | 42.2  | 5.66  | 287 | 7  |
| Q03252     | Lamin-B2 O  | 27.7419355  | 15 | 19 | 13 | 69.9  | 5.59  | 378 | 15 |
| 014745     | Na(+)/H(+)  | 46.9273743  | 11 | 17 | 11 | 38.8  | 5.77  | 184 | 11 |
| P22087     | rRNA 2'-O-  | 54.517134   | 13 | 18 | 13 | 33.8  | 10.18 | 266 | 13 |
| Q8IY81     | pre-rRNA p  | 21.3695396  | 14 | 16 | 14 | 96.5  | 8.4   | 186 | 14 |
| Q53HB3     | Proteasome  | 36.5909091  | 13 | 17 | 12 | 49.2  | 6.21  | 142 | 13 |
| Q16629     | Serine/argi | 40.7563025  | 11 | 18 | 11 | 27.4  | 11.82 | 184 | 11 |

|            |              |             |    |    |    |       |       |     |    |
|------------|--------------|-------------|----|----|----|-------|-------|-----|----|
| Q96124     | Far upstream | 34.965035   | 14 | 16 | 12 | 61.6  | 8.38  | 270 | 14 |
| Q12797     | Aspartyl/as  | 20.3166227  | 11 | 14 | 11 | 85.8  | 5.01  | 229 | 11 |
| Q92621     | Nuclear por  | 7.15705765  | 12 | 13 | 12 | 227.8 | 6.19  | 301 | 12 |
| A8KA83     | cDNA FLJ78   | 46.6942149  | 10 | 21 | 1  | 27.3  | 8.62  | 297 | 10 |
| P48047     | ATP synthas  | 70.8920188  | 12 | 20 | 12 | 23.3  | 9.96  | 357 | 12 |
| P40222     | Alpha-taxil  | 31.1355311  | 11 | 16 | 10 | 61.9  | 6.52  | 184 | 11 |
| H9ZYJ2     | Thioredoxin  | 66.6666667  | 8  | 18 | 8  | 11.7  | 4.92  | 393 | 8  |
| MOR2B7     | DNA polymer  | 14.7396293  | 12 | 15 | 11 | 126.3 | 7.21  | 257 | 12 |
| P08134     | Rho-relate   | 59.0673575  | 11 | 21 | 2  | 22    | 6.58  | 178 | 11 |
| H7C2Q8     | EBNA1 bindi  | 30.1939058  | 13 | 18 | 13 | 40.7  | 9.98  | 289 | 13 |
| Q6IBS0     | Twinfilin-2  | 45.8452722  | 11 | 15 | 8  | 39.5  | 6.84  | 148 | 11 |
| O75937     | DnaJ homolo  | 47.43083    | 8  | 12 | 8  | 29.8  | 9.06  | 98  | 8  |
| HOYKD8     | 60S ribosom  | 41.1764706  | 11 | 27 | 11 | 19.1  | 11.46 | 381 | 11 |
| A6NFX8     | ADP-sugar r  | 50.4310345  | 10 | 17 | 10 | 25.9  | 5.19  | 153 | 10 |
| Q06210     | Glutamine--  | 20.0286123  | 10 | 13 | 10 | 78.8  | 7.11  | 234 | 10 |
| O94826     | Mitochondri  | 33.2236842  | 12 | 15 | 12 | 67.4  | 7.12  | 157 | 12 |
| P61221     | ATP-binding  | 29.2153589  | 14 | 15 | 14 | 67.3  | 8.34  | 138 | 14 |
| BOY1W6     | Archain 1,   | 34.6014493  | 15 | 19 | 15 | 61.6  | 5.85  | 303 | 15 |
| Q9POL0     | Vesicle-ass  | 48.1927711  | 10 | 21 | 1  | 27.9  | 8.62  | 307 | 10 |
| P26196     | Probable A1  | 31.26294    | 9  | 12 | 8  | 54.4  | 8.66  | 212 | 9  |
| AOMNP2     | CDW11/WDR5   | 739.7759104 | 8  | 13 | 8  | 39.3  | 8.1   | 129 | 8  |
| Q13573     | SNW domain-  | 27.238806   | 9  | 10 | 9  | 61.5  | 9.52  | 204 | 9  |
| A6NHL2     | Tubulin al   | 15.470852   | 8  | 19 | 1  | 49.9  | 6.05  | 341 | 8  |
| Q14498     | RNA-binding  | 33.0188679  | 15 | 16 | 15 | 59.3  | 10.1  | 270 | 15 |
| P18583     | Protein S0   | 7.66694147  | 11 | 14 | 11 | 263.7 | 5.64  | 194 | 11 |
| O15294     | UDP-N-acety  | 16.9216061  | 12 | 17 | 12 | 116.9 | 6.7   | 227 | 12 |
| Q15021     | Condensin c  | 15.4175589  | 14 | 20 | 14 | 157.1 | 6.61  | 191 | 14 |
| P20290     | Transcripti  | 50.4854369  | 8  | 13 | 6  | 22.2  | 9.38  | 347 | 8  |
| P84077     | ADP-ribosyl  | 56.3535912  | 5  | 14 | 3  | 20.7  | 6.8   | 146 | 5  |
| P25788     | Proteasome   | 46.6666667  | 12 | 19 | 12 | 28.4  | 5.33  | 304 | 12 |
| AOA024RDE5 | Ras-GTPase   | 30.2904564  | 11 | 15 | 10 | 54.1  | 5.55  | 181 | 11 |
| V9HWE9     | Epididymis   | 51.9047619  | 6  | 10 | 6  | 23.3  | 5.64  | 203 | 6  |
| AOA087X1Z3 | Proteasome   | 41.3385827  | 9  | 13 | 9  | 29.1  | 6.71  | 218 | 9  |
| O60716     | Catenin del  | 16.0123967  | 11 | 14 | 11 | 108.1 | 6.23  | 240 | 11 |
| B7ZM99     | MTHFD1L pr   | 21.1440245  | 15 | 16 | 13 | 105.8 | 8.06  | 179 | 15 |
| Q9NSE4     | Isoleucine-  | 14.7233202  | 12 | 13 | 12 | 113.7 | 7.2   | 231 | 12 |
| P13073     | Cytochrome   | 46.7455621  | 11 | 17 | 11 | 19.6  | 9.51  | 176 | 11 |
| Q13442     | 28 kDa heat  | 33.7016575  | 9  | 11 | 9  | 20.6  | 8.87  | 361 | 9  |
| B4DZF2     | cDNA FLJ59   | 19.1836735  | 12 | 15 | 12 | 110.2 | 7.94  | 148 | 12 |
| P52888     | Thimet oli   | 21.6255443  | 14 | 17 | 14 | 78.8  | 6.05  | 286 | 14 |
| V9HW05     | Epididymis   | 69.7916667  | 5  | 11 | 1  | 10.8  | 8.76  | 262 | 5  |
| P60228     | Eukaryotic   | 33.4831461  | 14 | 15 | 14 | 52.2  | 6.04  | 321 | 14 |
| Q07021     | Complement   | 33.6879433  | 5  | 13 | 5  | 31.3  | 4.84  | 397 | 5  |
| Q13423     | NAD(P) trar  | 19.9815838  | 15 | 16 | 15 | 113.8 | 8.09  | 211 | 15 |
| P37108     | Signal rece  | 69.1176471  | 9  | 14 | 9  | 14.6  | 10.04 | 243 | 9  |
| Q6FG99     | RPLP1 prote  | 71.0526316  | 4  | 10 | 2  | 11.6  | 4.37  | 116 | 4  |
| P14550     | Alcohol del  | 43.6923077  | 10 | 15 | 9  | 36.6  | 6.79  | 226 | 10 |
| P62495     | Eukaryotic   | 22.8832952  | 9  | 11 | 9  | 49    | 5.71  | 212 | 9  |
| Q6YN16     | Hydroxyster  | 33.492823   | 9  | 12 | 9  | 45.4  | 7.99  | 231 | 9  |
| Q9Y6E2     | Basic leuci  | 26.9689737  | 10 | 17 | 10 | 48.1  | 6.68  | 188 | 10 |
| Q96AC1     | Fermitin f   | 26.1764706  | 13 | 17 | 13 | 77.8  | 6.7   | 220 | 13 |
| O00764     | Pyridoxal    | 153.8461538 | 10 | 13 | 10 | 35.1  | 6.13  | 342 | 10 |
| Q59FR8     | Galectin (I  | 28.6821705  | 6  | 13 | 6  | 27.1  | 8.41  | 315 | 6  |
| P62913     | 60S ribosom  | 68.5393258  | 12 | 24 | 12 | 20.2  | 9.6   | 372 | 12 |
| Q6IAW5     | CALU protei  | 45.7142857  | 9  | 13 | 9  | 37.1  | 4.64  | 173 | 9  |
| AOA0S2Z5I7 | Shwachman-I  | 47.6        | 11 | 13 | 11 | 28.7  | 8.75  | 250 | 11 |
| Q13057     | Bifunction   | 23.7588652  | 8  | 14 | 8  | 62.3  | 6.99  | 249 | 8  |
| Q9NUU7     | ATP-depend   | 33.0543933  | 13 | 15 | 13 | 53.9  | 6.58  | 209 | 13 |
| P02795     | Metallothio  | 67.2131148  | 4  | 10 | 1  | 6     | 7.83  | 368 | 4  |
| Q15436     | Protein tra  | 18.6928105  | 9  | 13 | 8  | 86.1  | 7.08  | 120 | 9  |
| Q9BZZ5     | Apoptosis i  | 20.610687   | 8  | 10 | 8  | 59    | 7.34  | 207 | 8  |
| P47813     | Eukaryotic   | 51.3888889  | 11 | 15 | 11 | 16.5  | 5.24  | 258 | 11 |
| Q9P287     | BRCA2 and    | ( 28.343949 | 6  | 12 | 6  | 36    | 4.61  | 317 | 6  |
| Q6FHV6     | ENO2 protei  | 17.9723502  | 5  | 25 | 2  | 47.2  | 5.03  | 833 | 5  |
| AOA024R1Q8 | Ribosomal r  | 55          | 11 | 20 | 11 | 14.9  | 10.51 | 247 | 11 |
| V9HWJ1     | Glutathion   | 35.6540084  | 13 | 15 | 13 | 52.4  | 5.92  | 136 | 13 |
| V9HWH9     | Protein S1   | (56.1904762 | 9  | 22 | 9  | 11.7  | 7.12  | 434 | 9  |
| AOAOKOK1K7 | 6-phosphogl  | 57.751938   | 10 | 14 | 10 | 27.5  | 6.05  | 191 | 10 |
| E9PMS6     | LIM domain   | 13.254902   | 13 | 15 | 13 | 145.3 | 7.3   | 311 | 13 |
| AOA0AOMRI2 | Sorting ne   | 35.4066986  | 12 | 12 | 12 | 47.8  | 6.43  | 214 | 12 |
| Q9BZK7     | F-box-like   | 19.2607004  | 6  | 8  | 4  | 55.6  | 5.55  | 277 | 6  |
| Q02880     | DNA topois   | 10.2706027  | 14 | 16 | 5  | 183.2 | 8     | 216 | 14 |
| Q9BXP5     | Serrate RN   | 21.2328767  | 14 | 15 | 14 | 100.6 | 5.96  | 261 | 14 |
| AOA0S2Z5M8 | ElaC homolo  | 25.0605327  | 13 | 17 | 13 | 92.2  | 7.9   | 153 | 13 |
| Q9HBD4     | SMARCA4 is   | 8.99344848  | 12 | 16 | 12 | 188   | 8.19  | 132 | 12 |
| P31150     | Rab GDP di   | 23.7136465  | 7  | 10 | 2  | 50.6  | 5.14  | 233 | 7  |
| P28074     | Proteasome   | 34.6007605  | 11 | 15 | 11 | 28.5  | 6.92  | 172 | 11 |



|            |                                             |              |    |    |    |       |       |     |    |
|------------|---------------------------------------------|--------------|----|----|----|-------|-------|-----|----|
| P36542     | ATP synthase                                | 32.2147651   | 9  | 13 | 9  | 33    | 9.22  | 285 | 9  |
| P51610     | Host cell                                   | 19.23832924  | 13 | 17 | 13 | 208.6 | 7.46  | 155 | 13 |
| 075223     | Gamma-glutamyl                              | 61.7021277   | 10 | 11 | 10 | 21    | 5.14  | 222 | 10 |
| Q59FI4     | Importin 4                                  | 12.2626582   | 11 | 11 | 11 | 138.1 | 5.25  | 319 | 11 |
| A0A024R1V4 | 60S ribosome                                | 49.2647059   | 9  | 17 | 9  | 15.8  | 10.56 | 290 | 9  |
| A0A140VJE8 | AP complex                                  | 11.8822292   | 11 | 14 | 10 | 105.6 | 5.34  | 247 | 11 |
| A0A087XOR6 | Sorting nexin                               | 77.9069767   | 12 | 18 | 11 | 19.8  | 7.78  | 190 | 12 |
| 075439     | Mitochondrial                               | 31.2883436   | 12 | 15 | 12 | 54.3  | 6.83  | 293 | 12 |
| P60866     | 40S ribosome                                | 48.7394958   | 10 | 24 | 9  | 13.4  | 9.94  | 357 | 10 |
| MOQYS1     | 60S ribosome                                | 47.6190476   | 15 | 31 | 15 | 24.2  | 10.86 | 300 | 15 |
| Q13126     | S-methyl-5'                                 | 46.2897527   | 9  | 12 | 5  | 31.2  | 7.18  | 141 | 9  |
| Q76LA1     | CSTB protein                                | 70.4081633   | 4  | 9  | 4  | 11.1  | 7.56  | 201 | 4  |
| Q92769     | Histone deacetylase                         | 25.4098361   | 8  | 13 | 4  | 55.3  | 5.91  | 129 | 8  |
| A0A024ROV4 | Vasodilator-stimulated phosphodiesterase    | 37.1052632   | 12 | 16 | 12 | 39.8  | 8.94  | 208 | 12 |
| A0A140VK11 | ClpB casein                                 | 19.2362093   | 10 | 12 | 10 | 78.7  | 9.01  | 133 | 10 |
| G3V180     | Dipeptidyl                                  | 22.7212682   | 10 | 12 | 10 | 84.3  | 5.03  | 185 | 10 |
| P30876     | DNA-directed RNA polymerase                 | 12.9471891   | 10 | 13 | 10 | 133.8 | 6.87  | 121 | 10 |
| Q6FGS1     | TPD52L2 protein                             | 56.7961165   | 9  | 10 | 1  | 22.2  | 5.36  | 306 | 9  |
| P56537     | Eukaryotic translation initiation factor 4E | 42.8571429   | 6  | 13 | 6  | 26.6  | 4.68  | 368 | 6  |
| Q16401     | 26S proteasome                              | 31.1507937   | 11 | 14 | 11 | 56.2  | 5.48  | 223 | 11 |
| Q7L1Q6     | Basic leucine zipper                        | 28.4009547   | 17 | 21 | 17 | 48    | 5.92  | 221 | 17 |
| A0A109NGN6 | Proteasome                                  | 51.8672199   | 10 | 15 | 10 | 26.4  | 4.79  | 302 | 10 |
| Q29988     | HLA-C protein                               | 19.6721311   | 5  | 11 | 1  | 40.8  | 6.4   | 261 | 5  |
| P19012     | Keratin, type I                             | 21.0526316   | 9  | 23 | 2  | 49.2  | 4.77  | 642 | 9  |
| Q8TCS8     | Polyribonucleoside phosphorylase            | 21.2005109   | 14 | 17 | 14 | 85.9  | 7.77  | 171 | 14 |
| P63151     | Serine/threonine kinase                     | 32.4384787   | 11 | 13 | 11 | 51.7  | 6.2   | 160 | 11 |
| 060488     | Long-chain fatty acid synthase              | 24.7538678   | 12 | 15 | 9  | 79.1  | 8.38  | 120 | 12 |
| A0A024QZK8 | Heterogeneous ribosomal protein             | 43.6416185   | 11 | 17 | 9  | 36.9  | 6.87  | 381 | 11 |
| Q01130     | Serine/arginine kinase                      | 30.7692308   | 7  | 10 | 7  | 25.5  | 11.85 | 211 | 7  |
| Q9UKS6     | Protein kinase                              | 28.7735849   | 8  | 10 | 8  | 48.5  | 6.18  | 202 | 8  |
| Q93008     | Probable protein                            | 7.12062257   | 14 | 14 | 14 | 292.1 | 5.8   | 235 | 14 |
| Q14203     | Dynactin subunit                            | 15.8841941   | 13 | 15 | 13 | 141.6 | 5.81  | 164 | 13 |
| A8K548     | cDNA FLJ75102                               | 12.3893805   | 8  | 8  | 8  | 119.6 | 4.34  | 282 | 8  |
| Q7L2H7     | Eukaryotic translation initiation factor 4E | 28.8770053   | 8  | 10 | 8  | 42.5  | 5.63  | 206 | 8  |
| Q14914     | Prostaglandin synthase                      | 34.6504559   | 8  | 12 | 8  | 35.8  | 8.29  | 191 | 8  |
| E9PR17     | CD59 glycoprotein                           | 27.6923077   | 5  | 12 | 5  | 14.5  | 7.77  | 175 | 5  |
| F8W7E0     | Calpastatin                                 | 28.4987277   | 8  | 13 | 1  | 41.7  | 7.05  | 165 | 8  |
| A0A0F7NGI8 | Leucine-rich repeat protein                 | 22.8723404   | 9  | 10 | 9  | 82.6  | 4.61  | 147 | 9  |
| P49790     | Nuclear pore complex protein                | 13.0847458   | 12 | 13 | 12 | 153.8 | 8.73  | 97  | 12 |
| Q5T9B7     | Adenylate kinase                            | 138.0952381  | 6  | 8  | 6  | 23.4  | 8.6   | 188 | 6  |
| Q59EL4     | PRPF4 protein                               | 25.8845438   | 11 | 14 | 11 | 60    | 7.56  | 232 | 11 |
| B2RAW0     | cDNA, FLJ91919                              | 3506494      | 11 | 13 | 11 | 82.4  | 5.53  | 243 | 11 |
| Q14684     | Ribosomal protein                           | 15.9630607   | 10 | 12 | 10 | 84.4  | 9.76  | 162 | 10 |
| B4DUT8     | Calponin                                    | 0536.0606061 | 9  | 11 | 9  | 35.9  | 7.3   | 238 | 9  |
| B2R6S5     | UMP-CMP kinase                              | 36.4035088   | 7  | 13 | 7  | 25.8  | 7.97  | 235 | 7  |
| Q13148     | TAR DNA-binding protein                     | 25.8454106   | 8  | 11 | 8  | 44.7  | 6.19  | 334 | 8  |
| Q92804     | TATA-binding protein                        | 24.4932432   | 7  | 10 | 6  | 61.8  | 8.02  | 231 | 7  |
| Q09161     | Nuclear cap protein                         | 17.0886076   | 9  | 10 | 9  | 91.8  | 6.43  | 205 | 9  |
| P07476     | Involucrin                                  | 24.2735043   | 10 | 13 | 10 | 68.4  | 4.61  | 167 | 10 |
| P62318     | Small nuclear ribonucleoprotein             | 46.031746    | 7  | 12 | 7  | 13.9  | 10.32 | 123 | 7  |
| P53618     | Coatomer subunit                            | 19.9370409   | 12 | 13 | 12 | 107.1 | 6.05  | 126 | 12 |
| B1AHD1     | NHP2-like protein                           | 43.9393939   | 6  | 10 | 6  | 14.6  | 8.46  | 236 | 6  |
| K7ELC2     | 40S ribosome                                | 47.3684211   | 5  | 13 | 5  | 17.7  | 10.39 | 119 | 5  |
| D2CFK9     | Nucleolar protein                           | 27.6025237   | 14 | 16 | 14 | 73.9  | 9.5   | 152 | 14 |
| Q5VZU9     | Tripeptidyl                                 | 13.866878    | 11 | 14 | 11 | 139.7 | 6.52  | 115 | 11 |
| Q53GL6     | RNA binding protein                         | 31.2703583   | 10 | 14 | 10 | 32.5  | 9.17  | 150 | 10 |
| Q59EH3     | Acid phosphatase                            | 67.8787879   | 8  | 10 | 8  | 18.7  | 7.88  | 304 | 8  |
| HOY2W2     | ATPase family                               | 23.2517483   | 12 | 14 | 1  | 64.3  | 9.44  | 220 | 12 |
| 000159     | Unconventional protein                      | 20.3198495   | 16 | 16 | 2  | 121.6 | 9.41  | 85  | 16 |
| Q9Y6C9     | Mitochondrial                               | 37.6237624   | 10 | 13 | 3  | 33.3  | 7.97  | 146 | 10 |
| Q01081     | Splicing factor                             | 29.1666667   | 7  | 15 | 7  | 27.9  | 8.81  | 264 | 7  |
| D3D1H7     | Myosin IC                                   | 22.1577726   | 15 | 15 | 1  | 98.9  | 9.42  | 119 | 15 |
| Q6IBR2     | FARSLA protein                              | 29.3307087   | 10 | 12 | 10 | 57.5  | 7.8   | 163 | 10 |
| P61254     | 60S ribosome                                | 59.3103448   | 13 | 24 | 4  | 17.2  | 10.55 | 310 | 13 |
| P51648     | Fatty aldehyde dehydrogenase                | 28.8659794   | 11 | 13 | 11 | 54.8  | 7.88  | 223 | 11 |
| E5RJD8     | Tubulin-specific                            | 42.8571429   | 6  | 10 | 6  | 14.3  | 5.12  | 236 | 6  |
| A0A140VJP2 | Testicular protein                          | 34.4311377   | 8  | 11 | 8  | 37.5  | 7.36  | 272 | 8  |
| Q9UKX7     | Nuclear pore complex protein                | 30.1282051   | 8  | 13 | 8  | 50.1  | 7.06  | 213 | 8  |
| A0A024QZY1 | JTV1 gene                                   | 33.4375      | 8  | 14 | 8  | 35.3  | 8.22  | 208 | 8  |
| Q9BUJ2     | Heterogeneous ribosomal protein             | 16.2383178   | 9  | 11 | 8  | 95.7  | 6.92  | 156 | 9  |
| A0A140VK53 | Testicular protein                          | 5.74127907   | 12 | 14 | 12 | 299.4 | 12.06 | 210 | 12 |
| 000116     | Alkyl dihydroxy                             | 22.6443769   | 11 | 12 | 11 | 72.9  | 7.34  | 146 | 11 |
| B2R704     | cDNA, FLJ91917                              | 0894526      | 12 | 14 | 12 | 83.9  | 9.54  | 224 | 12 |
| A0A024R6I3 | Testicular protein                          | 37.4429224   | 5  | 9  | 5  | 25    | 7.44  | 189 | 5  |
| 014579     | Coatomer subunit                            | 41.5584416   | 9  | 9  | 9  | 34.5  | 5.12  | 201 | 9  |
| P20618     | Proteasome                                  | 34.439834    | 9  | 16 | 9  | 26.5  | 8.13  | 121 | 9  |
| Q5QJE6     | Deoxy nucleoside                            | 19.3121693   | 9  | 9  | 9  | 84.4  | 6.16  | 253 | 9  |

|            |             |             |    |    |    |       |       |     |    |
|------------|-------------|-------------|----|----|----|-------|-------|-----|----|
| F8VXC8     | SWI/SNF con | 8.43373494  | 7  | 9  | 4  | 136.1 | 5.71  | 224 | 7  |
| O14975     | Very long-c | 22.5806452  | 8  | 11 | 8  | 70.3  | 8.51  | 94  | 8  |
| O95782     | AP-2 compl  | 18.321392   | 15 | 17 | 15 | 107.5 | 7.03  | 124 | 15 |
| Q5T5C7     | Serine--tr  | 34.3283582  | 14 | 16 | 14 | 61.3  | 7.06  | 194 | 14 |
| P62847     | 40S ribosom | 42.8571429  | 7  | 17 | 7  | 15.4  | 10.78 | 297 | 7  |
| AOA024R6S1 | DnaJ (Hsp4  | 25          | 8  | 13 | 8  | 45.7  | 6.48  | 75  | 8  |
| Q8TEM1     | Nuclear poi | 7.10121887  | 9  | 10 | 9  | 205   | 6.81  | 169 | 9  |
| P04181     | Ornithine ε | 35.5353075  | 11 | 13 | 10 | 48.5  | 7.03  | 108 | 11 |
| Q8NBJ5     | Procollagen | 25.0803859  | 12 | 16 | 12 | 71.6  | 7.31  | 224 | 12 |
| P61604     | 10 kDa heat | 77.4509804  | 10 | 25 | 5  | 10.9  | 8.92  | 437 | 10 |
| O60739     | Eukaryotic  | 65.4867257  | 4  | 7  | 1  | 12.8  | 7.37  | 163 | 4  |
| P31350     | Ribonucleo  | 21.8508997  | 7  | 10 | 7  | 44.8  | 5.38  | 192 | 7  |
| O94906     | Pre-mRNA-p  | 15.6216791  | 12 | 14 | 12 | 106.9 | 8.25  | 179 | 12 |
| O15347     | High mobili | 33.5        | 8  | 12 | 8  | 23    | 8.37  | 103 | 8  |
| O75116     | Rho-associ  | 11.3112392  | 13 | 13 | 12 | 160.8 | 6.02  | 172 | 13 |
| Q9UMX0     | Ubiquilin-1 | 14.770798   | 7  | 11 | 4  | 62.5  | 5.11  | 300 | 7  |
| A8K2T7     | Receptor pr | 12.5619835  | 10 | 12 | 10 | 134.1 | 6.7   | 182 | 10 |
| B2RAQ9     | Proteasome  | 28.8808664  | 6  | 10 | 6  | 29.9  | 7.68  | 208 | 6  |
| P12081     | Histidine-- | 30.4518664  | 13 | 16 | 10 | 57.4  | 5.88  | 162 | 13 |
| P00738     | Haptoglobin | 28.3251232  | 9  | 12 | 9  | 45.2  | 6.58  | 127 | 9  |
| A8K5U9     | cDNA FLJ75  | 17.9447853  | 8  | 11 | 8  | 70.7  | 7.62  | 184 | 8  |
| P21266     | Glutathione | 41.7777778  | 10 | 12 | 10 | 26.5  | 5.54  | 241 | 10 |
| E7EY12     | Treacle pro | 10.0134409  | 14 | 16 | 1  | 152.2 | 8.85  | 176 | 14 |
| Q96C19     | EF-hand dor | 38.3333333  | 10 | 14 | 10 | 26.7  | 5.2   | 226 | 10 |
| X5CMJ9     | Proteasome  | 40.942029   | 10 | 11 | 10 | 30.3  | 7.43  | 269 | 10 |
| H3BN98     | Uncharacter | 28.2700422  | 7  | 10 | 2  | 27.2  | 9.55  | 158 | 7  |
| P53582     | Methionine  | 35.2331606  | 8  | 13 | 8  | 43.2  | 7.17  | 51  | 8  |
| P51812     | Ribosomal p | 16.6216216  | 9  | 13 | 6  | 83.7  | 6.89  | 145 | 9  |
| Q6IAX2     | RPL21 prote | 41.25       | 8  | 16 | 8  | 18.6  | 10.49 | 203 | 8  |
| Q13428     | Treacle pro | 10.1478495  | 14 | 16 | 1  | 152   | 9.04  | 176 | 14 |
| Q9UBT2     | SUMO-activ  | 31.875      | 12 | 12 | 12 | 71.2  | 5.29  | 153 | 12 |
| P08243     | Asparagine  | 14.6167558  | 8  | 11 | 8  | 64.3  | 6.86  | 204 | 8  |
| Q92922     | SWI/SNF con | 12.760181   | 12 | 14 | 9  | 122.8 | 5.76  | 120 | 12 |
| P30040     | Endoplasmic | 37.5478927  | 8  | 14 | 8  | 29    | 7.31  | 191 | 8  |
| Q9Y295     | Development | 34.6049046  | 11 | 11 | 10 | 40.5  | 8.9   | 293 | 11 |
| O75340     | Programmed  | 48.6910995  | 7  | 11 | 7  | 21.9  | 5.4   | 199 | 7  |
| Q6FHG5     | Gamma-synuc | 73.2283465  | 6  | 9  | 6  | 13.3  | 4.86  | 270 | 6  |
| P08754     | Guanine nuc | 32.7683616  | 8  | 9  | 6  | 40.5  | 5.69  | 172 | 8  |
| AOA024R8P8 | Ribosomal p | 57.1428571  | 5  | 17 | 5  | 8.2   | 10.1  | 266 | 5  |
| AOA024R8R4 | Nuclear pro | 19.4078947  | 9  | 13 | 9  | 68.1  | 6.38  | 179 | 9  |
| Q8N355     | IGL@ protei | 40.5982906  | 7  | 15 | 7  | 24.8  | 6.37  | 329 | 7  |
| B1AKJ5     | Nardilysin  | 12.7973749  | 11 | 12 | 11 | 139.3 | 5     | 111 | 11 |
| B4E0L0     | cDNA FLJ54  | 35.6164384  | 11 | 14 | 11 | 48.1  | 9.92  | 104 | 11 |
| Q68E05     | Putative ur | 62.3655914  | 9  | 9  | 1  | 19.9  | 5.48  | 259 | 9  |
| Q53FE8     | cDNA FLJ36  | 23.7837838  | 7  | 11 | 7  | 40.5  | 5.14  | 293 | 7  |
| B4DM78     | cDNA FLJ58  | 122.1238938 | 9  | 10 | 1  | 63    | 6.77  | 276 | 9  |
| A7BT36     | p180/ribosc | 10.974026   | 12 | 12 | 12 | 165.6 | 8.97  | 185 | 12 |
| P84090     | Enhancer of | 60.5769231  | 8  | 17 | 8  | 12.3  | 5.92  | 275 | 8  |
| Q9Y3U8     | 60S ribosom | 38.0952381  | 7  | 15 | 7  | 12.2  | 11.59 | 249 | 7  |
| P07741     | Adenine ph  | 51.6666667  | 7  | 8  | 7  | 19.6  | 6.02  | 287 | 7  |
| AOA024R3E3 | Apolipoprot | 40.4494382  | 10 | 15 | 10 | 30.8  | 5.76  | 171 | 10 |
| Q01844     | RNA-binding | 16.0060976  | 6  | 8  | 5  | 68.4  | 9.33  | 173 | 6  |
| P28331     | NADH-ubiqui | 22.5584594  | 12 | 12 | 12 | 79.4  | 6.23  | 235 | 12 |
| Q9NQC3     | Reticulon-ε | 5.20134228  | 3  | 7  | 3  | 129.9 | 4.5   | 158 | 3  |
| P51114     | Fragile X m | 26.0869565  | 10 | 11 | 2  | 69.7  | 6.15  | 239 | 10 |
| A8K3F6     | cDNA FLJ77  | 29.1176471  | 6  | 10 | 1  | 37.6  | 6     | 256 | 6  |
| P09234     | U1 small nt | 32.7044025  | 5  | 7  | 5  | 17.4  | 9.67  | 119 | 5  |
| P52732     | Kinesin-lii | 13.7310606  | 11 | 13 | 11 | 119.1 | 5.64  | 190 | 11 |
| Q96QV6     | Histone H2f | 45.0381679  | 6  | 24 | 1  | 14.2  | 10.86 | 256 | 6  |
| P42224     | Signal trar | 14.4        | 9  | 11 | 9  | 87.3  | 6.05  | 223 | 9  |
| P31151     | Protein S1C | 38.6138614  | 7  | 13 | 4  | 11.5  | 6.77  | 269 | 7  |
| Q7L2E3     | Putative A1 | 15.7453936  | 13 | 14 | 13 | 133.9 | 8.78  | 100 | 13 |
| P26447     | Protein S1C | 49.5049505  | 8  | 27 | 8  | 11.7  | 6.11  | 420 | 8  |
| AOA0S2Z3Y1 | Lectin gal  | 18.2905983  | 7  | 9  | 7  | 65.3  | 5.27  | 252 | 7  |
| Q14690     | Protein RRF | 9.56707643  | 13 | 15 | 12 | 208.6 | 8.87  | 191 | 13 |
| Q9BTE3     | Mini-chrom  | 29.7507788  | 13 | 14 | 13 | 72.9  | 5.87  | 55  | 13 |
| AOAOKOK1L8 | Epididymis  | 47.3895582  | 10 | 12 | 10 | 28.7  | 6.02  | 247 | 10 |
| Q9NZI8     | Insulin-lii | 19.7573657  | 9  | 11 | 8  | 63.4  | 9.2   | 214 | 9  |
| Q14739     | Lamin-B rec | 16.4227642  | 6  | 8  | 6  | 70.7  | 9.36  | 107 | 6  |
| AOA1L7NY41 | Polypeptide | 25.0847458  | 10 | 12 | 10 | 66.4  | 8.25  | 126 | 10 |
| GIUI16     | SCC-112 pr  | 13.4629768  | 13 | 14 | 12 | 150.7 | 7.91  | 203 | 13 |
| AOA140VKE9 | Testis tiss | 18.6520376  | 7  | 9  | 7  | 71.4  | 5.2   | 115 | 7  |
| Q15008     | 26S proteas | 33.933162   | 12 | 15 | 12 | 45.5  | 5.62  | 162 | 12 |
| E5KND5     | Elongation  | 18.6418109  | 8  | 13 | 8  | 83.4  | 7.01  | 163 | 8  |
| P00387     | NADH-cytocl | 34.2192691  | 9  | 13 | 9  | 34.2  | 7.59  | 108 | 9  |
| O75475     | PC4 and SFI | 22.2641509  | 11 | 19 | 9  | 60.1  | 9.13  | 78  | 11 |
| A8K070     | COP9 signal | 22.4334601  | 9  | 13 | 9  | 58.9  | 6.32  | 116 | 9  |

|            |             |              |    |    |    |       |       |     |    |
|------------|-------------|--------------|----|----|----|-------|-------|-----|----|
| AOA024R9Y6 | Guanine nuc | 22.8522337   | 9  | 11 | 9  | 65.5  | 8.44  | 153 | 9  |
| Q92747     | Actin-relat | 23.5135135   | 5  | 6  | 4  | 41.5  | 8.18  | 126 | 5  |
| P30043     | Flavin red  | 54.8543689   | 7  | 10 | 7  | 22.1  | 7.65  | 106 | 7  |
| Q6IRT1     | S-(hydroxy  | 28.342246    | 11 | 13 | 11 | 39.7  | 7.49  | 178 | 11 |
| Q15637     | Splicing f  | 20.3442879   | 9  | 15 | 9  | 68.3  | 8.98  | 165 | 9  |
| Q96P70     | Importin-9  | 9.02977906   | 7  | 11 | 7  | 115.9 | 4.81  | 215 | 7  |
| Q9NR45     | Sialic acic | 40.1114206   | 9  | 12 | 9  | 40.3  | 6.74  | 146 | 9  |
| Q05519     | Serine/argi | 16.9421488   | 6  | 10 | 6  | 53.5  | 10.52 | 141 | 6  |
| Q15843     | NEDD8 OS=H  | 71.6049383   | 5  | 9  | 5  | 9.1   | 8.43  | 218 | 5  |
| AOA140VJK2 | Glycerol-3- | 25.0343879   | 14 | 15 | 14 | 80.8  | 7.53  | 138 | 14 |
| Q08ET0     | Cell proli  | 35.15625     | 9  | 13 | 9  | 28.9  | 9.36  | 238 | 9  |
| P25815     | Protein S1  | 44.2105263   | 6  | 10 | 6  | 10.4  | 4.88  | 364 | 6  |
| Q9BT10     | Acidic leuc | 22.3880597   | 7  | 10 | 7  | 30.7  | 3.85  | 187 | 7  |
| Q6DD88     | Atlastin-3  | 25.6931608   | 7  | 11 | 7  | 60.5  | 5.66  | 128 | 7  |
| Q9UNF0     | Protein kir | 22.0164609   | 8  | 10 | 8  | 55.7  | 5.2   | 139 | 8  |
| Q15370     | Elongin-B   | (60.1694915  | 7  | 14 | 7  | 13.1  | 4.88  | 111 | 7  |
| AOA0B4J2E5 | Uncharacter | 14.0369967   | 9  | 10 | 9  | 102.4 | 6.2   | 244 | 9  |
| Q9BYG3     | MKI67 FHA   | c30.3754266  | 6  | 9  | 6  | 34.2  | 9.88  | 241 | 6  |
| P43034     | Platelet-ac | 26.3414634   | 10 | 13 | 9  | 46.6  | 7.37  | 131 | 10 |
| Q15182     | Small nucl  | 19.6491228   | 6  | 12 | 6  | 29.7  | 10.07 | 144 | 6  |
| Q9COC9     | (E3-indepe  | 11.2229102   | 9  | 9  | 9  | 141.2 | 5.12  | 193 | 9  |
| 075131     | Copine-3    | 0520.6703911 | 7  | 9  | 7  | 60.1  | 5.85  | 193 | 7  |
| Q08257     | Quinone oxi | 27.9635258   | 6  | 10 | 6  | 35.2  | 8.44  | 191 | 6  |
| AOA140VJF4 | Biliverdin  | 30.4054054   | 9  | 12 | 9  | 33.4  | 6.44  | 151 | 9  |
| P04899     | Guanine nuc | 41.1267606   | 10 | 12 | 7  | 40.4  | 5.54  | 96  | 10 |
| Q86XP3     | ATP-depend  | 16.8443497   | 11 | 11 | 11 | 102.9 | 7.02  | 136 | 11 |
| Q16666     | Gamma-inter | 16.6878981   | 11 | 13 | 11 | 88.2  | 9.28  | 178 | 11 |
| Q7Z7K6     | Centromere  | 36.7272727   | 7  | 11 | 7  | 29.9  | 9.73  | 235 | 7  |
| Q9NYU2     | UDP-glucos  | 11.1897106   | 10 | 10 | 10 | 177.1 | 5.63  | 119 | 10 |
| 096019     | Actin-like  | 25.4079254   | 7  | 9  | 7  | 47.4  | 5.6   | 110 | 7  |
| P50570     | Dynamin-2   | (16.5517241  | 13 | 14 | 1  | 98    | 7.44  | 161 | 13 |
| P16401     | Histone H1  | 22.1238938   | 6  | 10 | 3  | 22.6  | 10.92 | 188 | 6  |
| 043818     | U3 small nt | 22.9473684   | 10 | 11 | 10 | 51.8  | 7.85  | 139 | 10 |
| P61956     | Small ubiq  | 33.6842105   | 4  | 12 | 3  | 10.9  | 5.5   | 204 | 4  |
| P61326     | Protein ma  | 46.5753425   | 6  | 13 | 6  | 17.2  | 6.11  | 132 | 6  |
| Q59EL2     | COP9 consti | 31.0421286   | 9  | 14 | 9  | 52.5  | 5.54  | 98  | 9  |
| P42766     | 60S riboso  | 37.398374    | 7  | 14 | 7  | 14.5  | 11.05 | 246 | 7  |
| AOA024R7I3 | RAB8A, mem  | 41.5458937   | 8  | 13 | 4  | 23.7  | 9.07  | 250 | 8  |
| Q8WX93     | Palladin    | 057.59219089 | 8  | 9  | 7  | 150.5 | 7.09  | 89  | 8  |
| P54920     | Alpha-solu  | 45.4237288   | 7  | 7  | 7  | 33.2  | 5.36  | 227 | 7  |
| A2VCK8     | Thymosin b  | 86.3636364   | 6  | 13 | 6  | 5.1   | 5.06  | 201 | 6  |
| P55036     | 26S protea  | 30.5039788   | 7  | 12 | 7  | 40.7  | 4.79  | 206 | 7  |
| Q16698     | 2,4-dienoy  | 125.9701493  | 6  | 7  | 6  | 36    | 9.28  | 232 | 6  |
| Q92917     | G patch do  | 34.4537815   | 10 | 11 | 10 | 52.2  | 6.15  | 172 | 10 |
| Q9NVP1     | ATP-depend  | 14.0298507   | 7  | 11 | 7  | 75.4  | 9.5   | 87  | 7  |
| B4E1U9     | cDNA FLJ54  | 48.3050847   | 8  | 12 | 7  | 26.5  | 7.59  | 97  | 8  |
| Q9H3K6     | Bo1A-like   | 172.0930233  | 6  | 9  | 6  | 10.1  | 6.52  | 142 | 6  |
| Q9BQ67     | Glutamate-1 | 25.5605381   | 7  | 8  | 7  | 49.4  | 4.92  | 135 | 7  |
| AOA140VKF1 | Kinesin-li  | 23.4482759   | 11 | 13 | 10 | 81.3  | 7.83  | 160 | 11 |
| Q13596     | Sorting ne  | 21.0727969   | 9  | 9  | 8  | 59    | 5.15  | 219 | 9  |
| E9PAU2     | Ribonucleo  | 27.7777778   | 9  | 10 | 9  | 79.5  | 8.92  | 81  | 9  |
| Q8N7H5     | RNA polym   | 16.7608286   | 7  | 10 | 7  | 59.9  | 4.63  | 188 | 7  |
| Q15020     | Squamous c  | 17.6531672   | 10 | 10 | 10 | 109.9 | 5.57  | 103 | 10 |
| Q5TDG3     | WD repeat   | (15.164369   | 11 | 13 | 11 | 106   | 6.64  | 193 | 11 |
| Q13501     | Sequestoso  | 25           | 8  | 9  | 8  | 47.7  | 5.22  | 129 | 8  |
| 043809     | Cleavage ar | 48.8986784   | 7  | 9  | 7  | 26.2  | 8.82  | 163 | 7  |
| Q14558     | Phosphoric  | 27.5280899   | 8  | 10 | 6  | 39.4  | 7.2   | 204 | 8  |
| Q8WWM7     | Ataxin-2-li | 15.9069767   | 12 | 15 | 12 | 113.3 | 8.59  | 137 | 12 |
| C9JA08     | 60S riboso  | 24.952741    | 9  | 11 | 9  | 60.1  | 6.62  | 121 | 9  |
| Q9UKD2     | mRNA turno  | 51.0460251   | 9  | 11 | 9  | 27.5  | 8.29  | 123 | 9  |
| P52948     | Nuclear por | 8.03522289   | 12 | 13 | 12 | 197.5 | 6.4   | 160 | 12 |
| Q9UNX3     | 60S riboso  | 56.5517241   | 11 | 18 | 2  | 17.2  | 10.55 | 270 | 11 |
| Q9H2U2     | Inorganic   | 129.6407186  | 6  | 7  | 5  | 37.9  | 7.39  | 157 | 6  |
| P50402     | Emerin OS=I | 37.007874    | 9  | 11 | 9  | 29    | 5.5   | 202 | 9  |
| P51148     | Ras-relate  | 44.4444444   | 9  | 13 | 6  | 23.5  | 8.41  | 311 | 9  |
| Q8WUM0     | Nuclear por | 9.68858131   | 7  | 8  | 7  | 128.9 | 5.1   | 106 | 7  |
| B2R4R9     | HCG26477    | 0572.4637681 | 7  | 15 | 7  | 7.8   | 10.7  | 127 | 7  |
| 075822     | Eukaryotic  | 41.4728682   | 6  | 9  | 6  | 29    | 4.83  | 123 | 6  |
| 000629     | Importin st | 25.3358925   | 8  | 9  | 6  | 57.9  | 4.96  | 73  | 8  |
| A4D2P0     | Ras-relate  | 38.8625592   | 9  | 13 | 8  | 23.5  | 8.63  | 295 | 9  |
| Q05CW7     | NAT10 prote | 21.8411552   | 10 | 12 | 1  | 62.3  | 9.26  | 211 | 10 |
| 000743     | Serine/thre | 32.7868852   | 7  | 8  | 7  | 35.1  | 5.69  | 135 | 7  |
| Q9GZZ1     | N-alpha-ac  | 56.8047337   | 7  | 11 | 7  | 19.4  | 8.81  | 134 | 7  |
| P27482     | Calmodulin  | -34.2281879  | 4  | 8  | 3  | 16.9  | 4.42  | 285 | 4  |
| P29373     | Cellular re | 39.8550725   | 6  | 8  | 6  | 15.7  | 5.4   | 138 | 6  |
| Q9UI30     | Multifuncti | 66.4         | 6  | 8  | 6  | 14.2  | 5.26  | 182 | 6  |
| Q7LOY3     | Mitochondri | 33.2506203   | 9  | 10 | 9  | 47.3  | 9.36  | 89  | 9  |

|            |                        |    |    |    |       |       |     |    |
|------------|------------------------|----|----|----|-------|-------|-----|----|
| P45973     | Chromobox 150.7853403  | 7  | 9  | 6  | 22.2  | 5.86  | 146 | 7  |
| P27105     | Erythrocyte38.5416667  | 6  | 10 | 6  | 31.7  | 7.88  | 110 | 6  |
| Q9NR31     | GTP-binding39.3939394  | 7  | 10 | 1  | 22.4  | 6.68  | 52  | 7  |
| B3KML1     | cDNA FLJ11118.3044316  | 8  | 9  | 8  | 58.4  | 5.06  | 243 | 8  |
| B2RBE0     | cDNA, FLJ914.5833333   | 8  | 9  | 5  | 80.3  | 8.46  | 188 | 8  |
| AOA024QYX3 | RNA binding56.6878981  | 5  | 7  | 5  | 17.2  | 8.91  | 171 | 5  |
| Q14CN4     | Keratin, ty9.19765166  | 6  | 14 | 1  | 55.8  | 6.89  | 284 | 6  |
| Q9UJU6     | Drebrin-like30.6976744 | 10 | 11 | 10 | 48.2  | 5.05  | 256 | 10 |
| Q9BRP8     | Partner of 46.0784314  | 7  | 8  | 7  | 22.6  | 9.45  | 176 | 7  |
| O14828     | Secretory c23.6311239  | 5  | 10 | 5  | 38.3  | 7.64  | 240 | 5  |
| Q9Y5J1     | U3 small nt17.2661871  | 7  | 9  | 7  | 62    | 8.76  | 159 | 7  |
| Q9BS26     | Endoplasmic32.5123153  | 8  | 8  | 7  | 46.9  | 5.26  | 99  | 8  |
| AOA0G2JPRO | Complement 7.16743119  | 8  | 9  | 8  | 192.8 | 7.03  | 193 | 8  |
| C9JRZ6     | MICOS comp130.1724138  | 6  | 8  | 6  | 26.7  | 8.47  | 216 | 6  |
| Q02818     | Nucleobindin28.8503254 | 10 | 10 | 9  | 53.8  | 5.25  | 117 | 10 |
| Q9UBQ5     | Eukaryotic 32.5688073  | 7  | 10 | 7  | 25    | 4.93  | 188 | 7  |
| P55263     | Adenosine 132.0441989  | 8  | 9  | 8  | 40.5  | 6.7   | 139 | 8  |
| P23634     | Plasma mem10.3142627   | 9  | 11 | 9  | 137.8 | 6.6   | 209 | 9  |
| P31937     | 3-hydroxyis20.5357143  | 5  | 8  | 5  | 35.3  | 8.13  | 146 | 5  |
| POCOS5     | Histone H2f 31.25      | 6  | 27 | 4  | 13.5  | 10.58 | 234 | 6  |
| P25685     | DnaJ homolog30.8823529 | 8  | 13 | 8  | 38    | 8.63  | 265 | 8  |
| B2RNR6     | Zinc finger9.68342644  | 7  | 8  | 7  | 116.9 | 9.04  | 170 | 7  |
| Q14137     | Ribosome bi13.9410188  | 8  | 12 | 8  | 83.6  | 6.19  | 102 | 8  |
| Q7L5N1     | COP9 signal27.2171254  | 7  | 8  | 7  | 36.1  | 5.73  | 169 | 7  |
| Q597H1     | Transforma32.7411168   | 6  | 7  | 6  | 42.8  | 5.82  | 134 | 6  |
| Q15785     | Mitochondri34.9514563  | 7  | 8  | 7  | 34.5  | 8.98  | 217 | 7  |
| Q8IX12     | Cell divisi 12.173913  | 10 | 13 | 4  | 132.7 | 5.76  | 107 | 10 |
| P15328     | Folate rece47.4708171  | 6  | 7  | 6  | 29.8  | 7.97  | 101 | 6  |
| P43246     | DNA mismatc12.5267666  | 9  | 9  | 9  | 104.7 | 5.77  | 227 | 9  |
| AOA075B6F9 | Nitric oxidc46.3815789 | 9  | 10 | 9  | 33.4  | 8.72  | 161 | 9  |
| P62316     | Small nucle57.6271186  | 7  | 13 | 7  | 13.5  | 9.91  | 92  | 7  |
| Q5SQH4     | DBP2 protei10.6628242  | 8  | 9  | 8  | 119.2 | 6.8   | 187 | 8  |
| B4EOX1     | Beta-2-micr36.8852459  | 4  | 9  | 4  | 13.9  | 7.44  | 183 | 4  |
| Q00059     | Transcripti36.5853659  | 8  | 11 | 8  | 29.1  | 9.72  | 135 | 8  |
| O14737     | Programmed 48          | 6  | 8  | 6  | 14.3  | 6.04  | 201 | 6  |
| H7BY58     | Protein-L-i 41.958042  | 8  | 10 | 8  | 30.3  | 6.73  | 112 | 8  |
| O14929     | Histone acc18.1384248  | 6  | 8  | 6  | 49.5  | 5.69  | 165 | 6  |
| AOA087WUB9 | Beta-cateni22.5352113  | 10 | 10 | 10 | 65.7  | 5.02  | 135 | 10 |
| O14776     | Transcripti14.1165756  | 12 | 12 | 11 | 123.8 | 8.65  | 137 | 12 |
| Q9UBQ0     | Vacuolar pi47.2527473  | 7  | 10 | 7  | 20.5  | 6.79  | 224 | 7  |
| O76071     | Probable cy28.0235988  | 6  | 6  | 6  | 37.8  | 4.97  | 171 | 6  |
| O95292     | Vesicle-ass36.6255144  | 7  | 10 | 7  | 27.2  | 7.3   | 194 | 7  |
| P13995     | Bifunctione 24         | 7  | 9  | 7  | 37.9  | 8.73  | 130 | 7  |
| P55735     | Protein SEC27.9503106  | 5  | 5  | 5  | 35.5  | 5.48  | 193 | 5  |
| P48960     | CD97 antigen8.50299401 | 6  | 7  | 6  | 91.8  | 6.87  | 221 | 6  |
| P22528     | Cornifin-B 70.7865169  | 7  | 21 | 2  | 9.9   | 8.48  | 191 | 7  |
| O75531     | Barrier-to-69.6629213  | 8  | 10 | 3  | 10.1  | 6.09  | 94  | 8  |
| Q53R19     | Arp2/3 comp40.3333333  | 9  | 12 | 9  | 34.3  | 7.36  | 99  | 9  |
| Q59G96     | Dynamain 2 i29.3634497 | 13 | 14 | 1  | 55.1  | 8.65  | 112 | 13 |
| H7BZJ3     | Protein dis50.4065041  | 6  | 11 | 1  | 13.5  | 7.3   | 308 | 6  |
| P48163     | NADP-dependc16.2587413 | 7  | 10 | 7  | 64.1  | 6.13  | 136 | 7  |
| B2RB06     | cDNA, FLJ9138.5350318  | 8  | 12 | 1  | 34.2  | 8.85  | 149 | 8  |
| O75306     | NADH dehydr30.3023758  | 8  | 10 | 8  | 52.5  | 7.55  | 150 | 8  |
| B2RBL3     | Thymidine 130.7053942  | 10 | 11 | 10 | 49.9  | 5.53  | 193 | 10 |
| P54727     | UV excisior24.4498778  | 7  | 9  | 7  | 43.1  | 4.84  | 148 | 7  |
| B2R791     | cDNA, FLJ914.6412884   | 8  | 10 | 8  | 77.5  | 9.5   | 168 | 8  |
| B2R657     | Annexin OS-18.0327869  | 6  | 9  | 6  | 52.6  | 5.52  | 156 | 6  |
| Q9UK76     | Hematologic46.7532468  | 4  | 9  | 4  | 16    | 5.6   | 120 | 4  |
| P32322     | Pyrroline-135.1097179  | 7  | 7  | 6  | 33.3  | 7.61  | 140 | 7  |
| P02790     | Hemopexin (27.4891775  | 9  | 10 | 9  | 51.6  | 7.02  | 86  | 9  |
| Q5M7Z5     | GRHPR protec29.0322581 | 7  | 9  | 7  | 36.8  | 6.35  | 143 | 7  |
| B3KNS8     | cDNA FLJ30120.7756233  | 5  | 9  | 5  | 41.5  | 10.59 | 123 | 5  |
| E9PF18     | Hydroxyacyl36.4779874  | 9  | 13 | 2  | 35.2  | 7.21  | 138 | 9  |
| P04732     | Metallothi54.0983607   | 3  | 6  | 1  | 6     | 7.96  | 280 | 3  |
| P41227     | N-alpha-acc42.9787234  | 8  | 14 | 8  | 26.4  | 5.64  | 82  | 8  |
| Q9NZB2     | Constitutiv11.0912343  | 8  | 10 | 8  | 121.8 | 8.88  | 116 | 8  |
| Q6FII1     | Glutathione32.7433628  | 7  | 7  | 7  | 25.5  | 8.41  | 197 | 7  |
| AOA0S2ZAZ6 | Serine/argi10.3485839  | 7  | 8  | 7  | 103.9 | 11.84 | 243 | 7  |
| Q6RFH5     | WD repeat-c19.7402597  | 6  | 8  | 6  | 42.4  | 8.32  | 171 | 6  |
| AOA024RDG1 | Vesicle doc11.4345114  | 8  | 12 | 8  | 107.8 | 4.91  | 153 | 8  |
| Q13823     | Nucleolar (15.3214774  | 10 | 12 | 10 | 83.6  | 9.25  | 97  | 10 |
| Q8WXI9     | Transcripti 21.079258  | 8  | 8  | 7  | 65.2  | 9.7   | 109 | 8  |
| Q6ICQ8     | ARHG protei46.5968586  | 6  | 8  | 5  | 21.3  | 8.12  | 167 | 6  |
| Q16822     | Phosphoenol 21.875     | 9  | 13 | 9  | 70.7  | 7.62  | 157 | 9  |
| P36507     | Dual specifi 26.75     | 7  | 9  | 4  | 44.4  | 6.55  | 125 | 7  |
| P40938     | Replicatio25.5617978   | 8  | 10 | 7  | 40.5  | 8.34  | 158 | 8  |
| A8K6D2     | cDNA FLJ76139.3442623  | 7  | 10 | 7  | 26.7  | 9.17  | 235 | 7  |

|            |             |             |    |    |    |       |       |     |    |
|------------|-------------|-------------|----|----|----|-------|-------|-----|----|
| HOYNJ9     | Deoxyuridir | 48.2517483  | 5  | 10 | 1  | 15.5  | 7.9   | 193 | 5  |
| Q6IT96     | Histone de  | 22.6141079  | 8  | 11 | 4  | 55.1  | 5.48  | 91  | 8  |
| Q13895     | Bystin OS=  | 21.0526316  | 7  | 9  | 7  | 49.6  | 8.12  | 88  | 7  |
| AOAOC4DGQ5 | Calpain sm  | 20.4968944  | 6  | 11 | 6  | 33.8  | 6.23  | 114 | 6  |
| Q9H2G2     | STE20-like  | 11.7408907  | 11 | 13 | 11 | 142.6 | 5.15  | 132 | 11 |
| Q96CW1     | AP-2 compl  | 19.5402299  | 8  | 10 | 8  | 49.6  | 9.54  | 227 | 8  |
| J3KQ48     | Peptidyl-t  | 28.8888889  | 4  | 5  | 4  | 19.3  | 8.73  | 202 | 4  |
| P01023     | Alpha-2-ma  | 8.20895522  | 10 | 10 | 10 | 163.2 | 6.46  | 131 | 10 |
| Q96EN8     | Molybdenum  | 16.6666667  | 7  | 7  | 7  | 98.1  | 6.7   | 158 | 7  |
| Q8NF37     | Lysosphosph | 17.4157303  | 7  | 8  | 7  | 59.1  | 6.02  | 174 | 7  |
| AOAOS2Z5H3 | Clathrin ir | 13.8413686  | 6  | 7  | 6  | 70.3  | 6.58  | 106 | 6  |
| Q96A08     | Histone H2F | 43.3070866  | 7  | 16 | 1  | 14.2  | 10.32 | 277 | 7  |
| P14735     | Insulin-de  | 15.5053974  | 10 | 12 | 10 | 117.9 | 6.61  | 61  | 10 |
| P83731     | 60S ribosom | 35.6687898  | 7  | 13 | 7  | 17.8  | 11.25 | 289 | 7  |
| A8K964     | cDNA FLJ75  | 10.460251   | 6  | 9  | 6  | 81.5  | 7.37  | 188 | 6  |
| P49589     | Cysteine--  | 10.9625668  | 6  | 10 | 6  | 85.4  | 6.76  | 91  | 6  |
| Q10713     | Mitochondri | 19.6190476  | 8  | 9  | 8  | 58.2  | 6.92  | 97  | 8  |
| Q9NQ29     | Putative R  | 24.2587601  | 9  | 13 | 3  | 43.7  | 9.92  | 113 | 9  |
| AOA024ROR4 | SUMO-1 acti | 26.8786127  | 7  | 9  | 7  | 38.4  | 5.3   | 134 | 7  |
| Q9BWF3     | RNA-binding | 25.5494505  | 7  | 8  | 7  | 40.3  | 7.08  | 141 | 7  |
| Q14764     | Major vault | 16.0134378  | 8  | 8  | 8  | 99.3  | 5.48  | 127 | 8  |
| Q92522     | Histone H1  | 23.4741784  | 5  | 10 | 5  | 22.5  | 10.76 | 106 | 5  |
| Q5VT79     | Annexin A8  | -26.6055046 | 6  | 7  | 6  | 36.9  | 5.78  | 83  | 6  |
| AOA024R7M0 | Transmembr  | 18.7234043  | 4  | 8  | 4  | 27.3  | 8.02  | 125 | 4  |
| B4DIS3     | Dpy-30-like | 42.5        | 3  | 6  | 3  | 13.9  | 7.5   | 162 | 3  |
| P55010     | Eukaryotic  | 32.4825986  | 11 | 14 | 11 | 49.2  | 5.58  | 117 | 11 |
| Q15631     | Translin O  | 38.5964912  | 6  | 8  | 6  | 26.2  | 6.44  | 145 | 6  |
| Q9UKY7     | Protein CD  | 45.7364341  | 6  | 6  | 6  | 27.3  | 6.4   | 112 | 6  |
| Q16795     | NADH dehyd  | 25.464191   | 8  | 10 | 8  | 42.5  | 9.8   | 193 | 8  |
| A1LOTO     | Acetolactat | 20.0949367  | 8  | 12 | 8  | 67.8  | 8.15  | 117 | 8  |
| P50897     | Palmitoyl-  | 27.4509804  | 5  | 7  | 5  | 34.2  | 6.52  | 92  | 5  |
| P35249     | Replicatio  | 33.6088154  | 10 | 10 | 10 | 39.7  | 8.02  | 149 | 10 |
| Q9Y3B4     | Splicing fa | 36          | 4  | 6  | 4  | 14.6  | 9.38  | 178 | 4  |
| P35270     | Sepiapterin | 34.0996169  | 6  | 7  | 6  | 28    | 8.05  | 207 | 6  |
| P46063     | ATP-depend  | 20.9553159  | 13 | 13 | 13 | 73.4  | 7.88  | 129 | 13 |
| B2R6E2     | cDNA, FLJ9  | 19.4029851  | 6  | 6  | 6  | 51.6  | 5.25  | 86  | 6  |
| Q96DG6     | Carboxymet  | 31.4285714  | 6  | 12 | 6  | 28    | 7.18  | 175 | 6  |
| Q9Y678     | Coatomer s  | 13.6155606  | 9  | 10 | 7  | 97.7  | 5.47  | 156 | 9  |
| E7EVH7     | Uncharacter | 16.3934426  | 8  | 10 | 5  | 83.6  | 7.31  | 133 | 8  |
| AOA1B0GV13 | Keratin, t  | 50.4672897  | 5  | 9  | 4  | 10    | 8.44  | 267 | 5  |
| Q86UA3     | Chromosome  | 25.5319149  | 7  | 8  | 7  | 42.5  | 6.84  | 134 | 7  |
| Q6NUK1     | Calcium-bir | 21.802935   | 9  | 11 | 9  | 53.3  | 6.33  | 161 | 9  |
| P51572     | B-cell rece | 21.9512195  | 5  | 7  | 5  | 28    | 8.44  | 139 | 5  |
| P00492     | Hypoxanthi  | 42.2018349  | 7  | 10 | 7  | 24.6  | 6.68  | 179 | 7  |
| Q9NVI7     | ATPase fami | 19.5583596  | 12 | 13 | 1  | 71.3  | 8.98  | 137 | 12 |
| Q15061     | WD repeat-  | 17.282127   | 8  | 10 | 8  | 74.8  | 5.57  | 86  | 8  |
| Q14019     | Coactosin-  | 168.3098592 | 8  | 10 | 8  | 15.9  | 5.67  | 161 | 8  |
| Q16222     | UDP-N-acety | 17.0498084  | 6  | 9  | 6  | 58.7  | 6.33  | 223 | 6  |
| P16083     | Ribosylidih | 29.004329   | 5  | 7  | 5  | 25.9  | 6.29  | 170 | 5  |
| P51571     | Translocon- | 37.5722543  | 5  | 8  | 5  | 19    | 6.15  | 211 | 5  |
| P02671     | Fibrinogen  | 8.19861432  | 6  | 8  | 6  | 94.9  | 6.01  | 150 | 6  |
| B5ME97     | Septin 10,  | 15.9926471  | 5  | 7  | 5  | 62.9  | 6.83  | 104 | 5  |
| P56199     | Integrin al | 6.53095844  | 7  | 8  | 7  | 130.8 | 6.29  | 210 | 7  |
| Q8N1G4     | Leucine-ric | 19.2109777  | 9  | 11 | 9  | 63.4  | 8.28  | 126 | 9  |
| AOAOS2Z3W7 | Nucleotide  | 56.7010309  | 7  | 8  | 7  | 21.4  | 5.66  | 98  | 7  |
| Q6KB66     | Keratin, t  | 18.8053097  | 9  | 10 | 7  | 50.5  | 5.67  | 188 | 9  |
| P00403     | Cytochrome  | 16.2995595  | 4  | 6  | 4  | 25.5  | 4.82  | 151 | 4  |
| P42677     | 40S ribosom | 47.6190476  | 7  | 13 | 4  | 9.5   | 9.45  | 110 | 7  |
| P68431     | Histone H3  | 41.1764706  | 11 | 22 | 11 | 15.4  | 11.12 | 263 | 11 |
| 075489     | NADH dehyd  | 37.1212121  | 8  | 8  | 8  | 30.2  | 7.5   | 177 | 8  |
| Q96FQ6     | Protein S1  | 38.8349515  | 6  | 8  | 6  | 11.8  | 6.79  | 141 | 6  |
| P08574     | Cytochrome  | 20.6153846  | 5  | 8  | 5  | 35.4  | 9     | 111 | 5  |
| P35659     | Protein DEF | 23.7333333  | 9  | 10 | 9  | 42.6  | 8.56  | 134 | 9  |
| P30626     | Sorcin OS=  | 31.3131313  | 6  | 8  | 6  | 21.7  | 5.59  | 183 | 6  |
| V9HW44     | Epididymis  | 41.0480349  | 6  | 8  | 6  | 25.6  | 5.92  | 163 | 6  |
| B4EOY9     | Serine/thre | 30.1369863  | 8  | 11 | 5  | 49.2  | 5.68  | 148 | 8  |
| J3QLS3     | 28S ribosom | 28.4132841  | 5  | 7  | 5  | 31.7  | 9.86  | 107 | 5  |
| P48735     | Isocitrate  | 21.9026549  | 7  | 8  | 7  | 50.9  | 8.69  | 118 | 7  |
| Q9HOD6     | 5'-3' exori | 12.8421053  | 9  | 11 | 9  | 108.5 | 7.47  | 132 | 9  |
| Q15003     | Condensin   | 14.8448043  | 7  | 9  | 7  | 82.5  | 5.06  | 87  | 7  |
| Q5SQP8     | C-terminal- | 18.3235867  | 9  | 9  | 5  | 56.1  | 6.96  | 180 | 9  |
| Q96B97     | SH3 domain- | 19.5488722  | 10 | 10 | 10 | 73.1  | 6.62  | 117 | 10 |
| Q9H6R4     | Nucleolar   | 11.2565445  | 8  | 9  | 8  | 127.5 | 7.64  | 85  | 8  |
| Q9BRA2     | Thioredoxin | 67.4796748  | 7  | 11 | 7  | 13.9  | 5.52  | 124 | 7  |
| Q92878     | DNA repair  | 12.0426829  | 10 | 11 | 10 | 153.8 | 6.89  | 75  | 10 |
| Q99536     | Synaptic ve | 27.7353669  | 8  | 10 | 8  | 41.9  | 6.29  | 96  | 8  |
| Q6IPI1     | 60S ribosom | 22.9813665  | 6  | 15 | 6  | 17.9  | 11.66 | 248 | 6  |

|            |              |              |    |    |    |       |       |     |    |
|------------|--------------|--------------|----|----|----|-------|-------|-----|----|
| Q9NWH9     | SAFB-like    | 17.73694391  | 7  | 7  | 7  | 117.1 | 7.87  | 151 | 7  |
| P55327     | Tumor prote  | 56.6964286   | 8  | 9  | 8  | 24.3  | 4.83  | 139 | 8  |
| P82979     | SAP domain-  | 40           | 7  | 8  | 7  | 23.7  | 6.42  | 167 | 7  |
| Q9Y6K5     | 2'-5'-oligo  | 11.9595216   | 9  | 9  | 9  | 121.1 | 8.4   | 103 | 9  |
| 075607     | Nucleoplasm  | 36.5168539   | 4  | 5  | 4  | 19.3  | 4.63  | 181 | 4  |
| B2R802     | cDNA, FLJ9   | 25.5319149   | 4  | 7  | 4  | 31.3  | 9.86  | 116 | 4  |
| Q16630     | Cleavage ar  | 13.2486388   | 6  | 8  | 6  | 59.2  | 7.15  | 149 | 6  |
| A8K8B0     | cDNA FLJ7    | 62.8935532   | 6  | 7  | 3  | 73.5  | 5.1   | 244 | 6  |
| Q7Z2Z2     | Elongation   | 9.82142857   | 8  | 8  | 8  | 125.4 | 5.91  | 105 | 8  |
| A8K517     | Ribosomal    | 141.2587413  | 6  | 13 | 6  | 15.8  | 10.49 | 191 | 6  |
| AOA0D9SGE8 | PHD finger   | 27.3224044   | 7  | 8  | 7  | 41.3  | 8.68  | 162 | 7  |
| Q9BTV4     | Transmembr   | 22.25        | 4  | 5  | 4  | 44.8  | 8.13  | 80  | 4  |
| J3KQJ1     | Sulfatase-   | 27.1875      | 6  | 7  | 6  | 35.9  | 9.19  | 113 | 6  |
| G5EA30     | CUG triple   | 17.1206226   | 8  | 8  | 8  | 55.1  | 8.38  | 199 | 8  |
| Q68D38     | Putative ur  | 43.6507937   | 6  | 7  | 2  | 28    | 5.8   | 83  | 6  |
| Q5JTV8     | Torsin-1A-   | 17.1526587   | 7  | 7  | 7  | 66.2  | 8.18  | 166 | 7  |
| P09661     | U2 small n   | 38.0392157   | 9  | 11 | 9  | 28.4  | 8.62  | 128 | 9  |
| AOA024R8E4 | Chromosome   | 36.32287     | 7  | 8  | 7  | 25.4  | 5.52  | 182 | 7  |
| P13807     | Glycogen     | [11.3975577  | 5  | 6  | 5  | 83.7  | 6.18  | 110 | 5  |
| K7EIK7     | Echinoderm   | 14.7477361   | 7  | 7  | 7  | 84.7  | 6.87  | 97  | 7  |
| B3KMR5     | cDNA FLJ1    | 248.63531226 | 12 | 12 | 12 | 143.6 | 8.75  | 193 | 12 |
| Q13620     | Cullin-4B    | (8.32420591  | 6  | 10 | 1  | 103.9 | 7.37  | 118 | 6  |
| P21964     | Catechol O-  | 36.5313653   | 5  | 6  | 5  | 30    | 5.47  | 106 | 5  |
| Q86X55     | Histone-ar   | 18.4210526   | 6  | 7  | 6  | 65.8  | 6.73  | 118 | 6  |
| 043488     | Aflatoxin    | 124.7910864  | 8  | 9  | 8  | 39.6  | 7.17  | 188 | 8  |
| P30419     | Glycylpept   | 21.3709677   | 7  | 8  | 7  | 56.8  | 7.8   | 101 | 7  |
| Q9GZS3     | WD repeat-   | 42.9508197   | 8  | 9  | 8  | 33.6  | 5.47  | 55  | 8  |
| Q9NXG2     | THUMP dom    | 22.0963173   | 7  | 9  | 7  | 39.3  | 7.88  | 144 | 7  |
| P53041     | Serine/thre  | 13.6272545   | 6  | 8  | 6  | 56.8  | 6.28  | 163 | 6  |
| AOA087WWF6 | DNA polymer  | 20.0396825   | 6  | 6  | 6  | 54.7  | 5.95  | 195 | 6  |
| P42771     | Cyclin-dep   | 48.0769231   | 4  | 5  | 2  | 16.5  | 5.81  | 125 | 4  |
| 000469     | Procollagen  | 11.6689281   | 6  | 7  | 6  | 84.6  | 6.71  | 119 | 6  |
| P06703     | Protein S1   | 26.6666667   | 7  | 10 | 7  | 10.2  | 5.48  | 197 | 7  |
| P50213     | Isocitrate   | 22.6775956   | 7  | 9  | 7  | 39.6  | 6.92  | 145 | 7  |
| Q6FH36     | Peptidyl-p   | 37.2881356   | 3  | 5  | 3  | 19.2  | 8.07  | 124 | 3  |
| P49756     | RNA-binding  | 17.9122183   | 12 | 13 | 12 | 100.1 | 6.32  | 63  | 12 |
| AOA0A0MSW4 | Phosphatid   | 28.7822878   | 6  | 7  | 5  | 31.6  | 6.87  | 78  | 6  |
| 095758     | Polypyrimic  | 21.0144928   | 8  | 8  | 5  | 59.7  | 9.04  | 161 | 8  |
| P16070     | CD44 antigen | 11.9946092   | 8  | 10 | 8  | 81.5  | 5.33  | 218 | 8  |
| Q9UHV9     | Prefoldin    | 53.2467532   | 9  | 10 | 9  | 16.6  | 6.58  | 100 | 9  |
| Q9NQW6     | Anillin OS-  | 12.544484    | 9  | 9  | 9  | 124.1 | 8.07  | 112 | 9  |
| Q6P2E9     | Enhancer of  | 10.0642398   | 9  | 9  | 9  | 151.6 | 5.86  | 125 | 9  |
| Q15738     | Sterol-4-al  | 24.9329759   | 6  | 7  | 6  | 41.9  | 8.06  | 216 | 6  |
| P49720     | Proteasome   | 33.6585366   | 7  | 8  | 7  | 22.9  | 6.55  | 137 | 7  |
| E9PIE4     | Mitochondri  | 34.7328244   | 8  | 9  | 1  | 28.5  | 7.61  | 102 | 8  |
| Q9GZZ9     | Ubiquitin-   | 122.7722772  | 6  | 8  | 6  | 44.8  | 4.84  | 139 | 6  |
| Q6IB11     | PGRMC1 prot  | 33.3333333   | 6  | 8  | 6  | 21.7  | 4.7   | 207 | 6  |
| P07858     | Cathepsin    | 118.2890855  | 5  | 7  | 5  | 37.8  | 6.3   | 98  | 5  |
| P52895     | Aldo-keto    | 125.6965944  | 9  | 11 | 4  | 36.7  | 7.49  | 104 | 9  |
| P05114     | Non-histone  | 28           | 3  | 7  | 3  | 10.7  | 9.6   | 167 | 3  |
| Q9Y3C6     | Peptidyl-p   | 33.1325301   | 4  | 6  | 4  | 18.2  | 7.99  | 160 | 4  |
| Q562Z4     | Actin-like   | 52.4271845   | 3  | 19 | 1  | 11.5  | 7.58  | 189 | 3  |
| P06132     | Uroporphyr   | 29.7002725   | 7  | 7  | 7  | 40.8  | 6.14  | 140 | 7  |
| Q6IPH7     | RPL14 prote  | 33.6363636   | 7  | 14 | 1  | 23.8  | 10.93 | 270 | 7  |
| B4DEE8     | cDNA FLJ5    | 634.4537815  | 5  | 6  | 5  | 25    | 8.66  | 109 | 5  |
| 075521     | Enoyl-CoA    | 25.3807107   | 7  | 8  | 7  | 43.6  | 9     | 111 | 7  |
| Q14376     | UDP-glucose  | 23.8505747   | 5  | 6  | 5  | 38.3  | 6.73  | 125 | 5  |
| B4DS79     | cDNA FLJ5    | 625.4509018  | 9  | 11 | 8  | 53.8  | 4.69  | 112 | 9  |
| 075832     | 26S proteas  | 35.840708    | 5  | 8  | 5  | 24.4  | 6.1   | 143 | 5  |
| 095861     | 3' (2'), 5'  | -128.5714286 | 6  | 6  | 6  | 33.4  | 5.69  | 195 | 6  |
| Q96GQ7     | Probable A   | 111.5577889  | 8  | 10 | 8  | 89.8  | 9.28  | 135 | 8  |
| Q9NY61     | Protein AA   | 12.3214286   | 5  | 6  | 5  | 63.1  | 4.94  | 136 | 5  |
| Q9BPX3     | Condensin    | 17.38916256  | 5  | 6  | 5  | 114.3 | 5.59  | 148 | 5  |
| Q6FIC5     | Chloride ir  | 33.5968379   | 5  | 8  | 5  | 28.8  | 5.59  | 83  | 5  |
| P62854     | 40S ribosom  | 44.3478261   | 5  | 10 | 5  | 13    | 11    | 117 | 5  |
| Q01780     | Exosome con  | 11.0734463   | 8  | 8  | 8  | 100.8 | 8.46  | 127 | 8  |
| B2R7B5     | cDNA, FLJ9   | 18.0586907   | 9  | 14 | 9  | 48.2  | 8.66  | 148 | 9  |
| P07919     | Cytochrome   | 19.7802198   | 1  | 3  | 1  | 10.7  | 4.44  | 195 | 1  |
| Q8NFB9     | MLL/SEPTIN   | 14.1323792   | 6  | 10 | 4  | 63.1  | 8.02  | 117 | 6  |
| H3BSH7     | U3 small nu  | 16           | 8  | 9  | 8  | 77.9  | 8.72  | 122 | 8  |
| P17480     | Nucleolar    | 12.565445    | 8  | 9  | 8  | 89.4  | 5.81  | 91  | 8  |
| P54709     | Sodium/pot   | 33.3333333   | 6  | 9  | 6  | 31.5  | 8.35  | 88  | 6  |
| A4D105     | Replicatio   | 61.9834711   | 5  | 6  | 5  | 13.6  | 5.08  | 153 | 5  |
| V9GYM8     | Rho guanine  | 10.1842871   | 9  | 9  | 9  | 116   | 7.37  | 152 | 9  |
| Q92734     | Protein TF   | 18.25        | 6  | 7  | 6  | 43.4  | 5.1   | 91  | 6  |
| AOA0B4J1V8 | HCG2039996   | 9.44584383   | 5  | 6  | 5  | 87.9  | 9.51  | 130 | 5  |
| 095456     | Proteasome   | 32.9861111   | 8  | 8  | 8  | 32.8  | 7.17  | 112 | 8  |

|            |              |             |    |    |   |       |       |     |    |
|------------|--------------|-------------|----|----|---|-------|-------|-----|----|
| P51970     | NADH dehydr  | 41.2790698  | 6  | 6  | 6 | 20.1  | 7.65  | 109 | 6  |
| Q7Z739     | YTH domain   | 10.5982906  | 5  | 7  | 4 | 63.8  | 9.04  | 159 | 5  |
| B7Z4C8     | 60S ribosom  | 45.3846154  | 8  | 9  | 8 | 15.1  | 10.37 | 100 | 8  |
| B3KXW5     | cDNA FLJ4618 | .99408284   | 7  | 9  | 7 | 94.1  | 7.05  | 132 | 7  |
| A6NDU8     | UPF0600 pro  | 17.6870748  | 3  | 4  | 3 | 33.6  | 5.26  | 69  | 3  |
| Q9NZL4     | Hsp70-bind   | 24.8618785  | 6  | 7  | 6 | 39.4  | 5.21  | 162 | 6  |
| 060869     | Endothelial  | 25.6756757  | 5  | 9  | 5 | 16.4  | 9.95  | 141 | 5  |
| Q86SG5     | Protein S1   | (49.5049505 | 5  | 10 | 2 | 11.3  | 7.44  | 213 | 5  |
| Q9UBK8     | Methionine   | 11.0344828  | 6  | 7  | 6 | 80.4  | 6.49  | 155 | 6  |
| Q05CP8     | CCDC6 prote  | 18.2634731  | 8  | 10 | 6 | 38.1  | 9.39  | 142 | 8  |
| Q13177     | Serine/thre  | 19.4656489  | 8  | 9  | 8 | 58    | 5.96  | 151 | 8  |
| Q8WU90     | Zinc finger  | 19.9530516  | 8  | 8  | 8 | 48.6  | 5.31  | 167 | 8  |
| Q9H773     | dCTP pyropl  | 60.5882353  | 6  | 7  | 6 | 18.7  | 5.03  | 88  | 6  |
| Q9H2U1     | ATP-depend   | 10.4166667  | 7  | 9  | 7 | 114.7 | 7.68  | 87  | 7  |
| Q14320     | Protein FAM  | 12.6843658  | 3  | 5  | 3 | 40.2  | 6.83  | 145 | 3  |
| Q92930     | Ras-relate   | 41.5458937  | 8  | 12 | 4 | 23.6  | 9.07  | 177 | 8  |
| P07108     | Acyl-CoA-bi  | 45.9770115  | 4  | 7  | 4 | 10    | 6.57  | 163 | 4  |
| 043681     | ATPase ASN   | (29.5977011 | 8  | 9  | 8 | 38.8  | 4.91  | 92  | 8  |
| P23258     | Tubulin gan  | 27.9379157  | 6  | 8  | 6 | 51.1  | 6.14  | 92  | 6  |
| P42025     | Beta-centre  | 29.787234   | 6  | 10 | 3 | 42.3  | 6.4   | 138 | 6  |
| Q14318     | Peptidyl-pr  | 19.4174757  | 7  | 8  | 7 | 44.5  | 4.84  | 140 | 7  |
| Q14651     | Plastin-1    | (11.9236884 | 5  | 7  | 2 | 70.2  | 5.41  | 241 | 5  |
| P08240     | Signal rece  | 11.9122257  | 6  | 7  | 6 | 69.8  | 8.95  | 121 | 6  |
| Q8NE86     | Calcium uni  | 21.3675214  | 6  | 6  | 6 | 39.8  | 8.65  | 124 | 6  |
| P11172     | Uridine 5'   | -19.5833333 | 7  | 9  | 7 | 52.2  | 7.24  | 106 | 7  |
| I1SRC5     | UBE2L3/KRA   | 39.8648649  | 7  | 7  | 4 | 34    | 8.1   | 101 | 7  |
| Q9Y277     | Voltage-dep  | 26.1484099  | 6  | 8  | 6 | 30.6  | 8.66  | 79  | 6  |
| Q96199     | Succinate--  | 17.3611111  | 6  | 7  | 6 | 46.5  | 6.39  | 184 | 6  |
| Q13451     | Peptidyl-pr  | 24.2888403  | 8  | 9  | 8 | 51.2  | 5.9   | 48  | 8  |
| Q9UJS0     | Calcium-bir  | 12.1481481  | 6  | 8  | 6 | 74.1  | 8.62  | 91  | 6  |
| 014773     | Tripeptidyl  | 11.722913   | 3  | 5  | 3 | 61.2  | 6.48  | 179 | 3  |
| P40261     | Nicotinamic  | 22.7272727  | 6  | 6  | 6 | 29.6  | 5.74  | 123 | 6  |
| B2C1S9     | Caspase 14,  | 31.8181818  | 7  | 9  | 7 | 27.7  | 5.58  | 98  | 7  |
| V9HW90     | Epididymis   | 19.9233716  | 6  | 7  | 6 | 56.2  | 8.5   | 104 | 6  |
| Q99829     | Copine-1     | (18.6219739 | 8  | 9  | 8 | 59    | 5.83  | 98  | 8  |
| Q14694     | Ubiquitin    | (15.037594  | 7  | 8  | 7 | 87.1  | 5.31  | 77  | 7  |
| 075494     | Serine/argi  | 29.0076336  | 5  | 8  | 5 | 31.3  | 11.27 | 43  | 5  |
| Q01085     | Nucleolysin  | 17.3333333  | 5  | 5  | 4 | 41.6  | 7.74  | 159 | 5  |
| Q5LJA9     | Ubiquitin    | (22.5543478 | 7  | 8  | 7 | 41.7  | 5.53  | 98  | 7  |
| Q9H444     | Charged mul  | 22.7678571  | 6  | 9  | 6 | 24.9  | 4.82  | 210 | 6  |
| P50416     | Carnitine    | (13.9715395 | 9  | 10 | 9 | 88.3  | 8.65  | 170 | 9  |
| V9HW41     | Epididymis   | 38.1578947  | 7  | 11 | 7 | 17.1  | 6.57  | 99  | 7  |
| 000267     | Transcripti  | 11.1315547  | 7  | 8  | 7 | 120.9 | 5.06  | 73  | 7  |
| HOY5E8     | GTP-binding  | 55.6521739  | 7  | 10 | 2 | 13.1  | 6.61  | 0   | 7  |
| Q14151     | Scaffold at  | 12.3819517  | 10 | 13 | 3 | 107.4 | 6.16  | 65  | 10 |
| Q9NXV6     | CDKN2A-int   | 17.4137931  | 7  | 8  | 7 | 61.1  | 9.01  | 149 | 7  |
| B4DWA0     | cDNA FLJ541  | 12.5        | 2  | 11 | 1 | 34.3  | 10.37 | 101 | 2  |
| Q02241     | Kinesin-li   | 9.1666667   | 7  | 7  | 7 | 110   | 8.51  | 140 | 7  |
| Q9H1E3     | Nuclear ubi  | 16.872428   | 6  | 10 | 6 | 27.3  | 5.08  | 121 | 6  |
| 060502     | Protein O-   | (13.1004367 | 8  | 8  | 8 | 102.8 | 4.91  | 84  | 8  |
| Q7KZ85     | Transcripti  | 7.3580533   | 7  | 7  | 7 | 198.9 | 4.91  | 70  | 7  |
| B4DR61     | Protein tra  | 10.5809129  | 5  | 9  | 5 | 52.9  | 8.24  | 126 | 5  |
| Q5HYL6     | Putative ur  | 21.875      | 6  | 9  | 6 | 39.5  | 5.19  | 74  | 6  |
| Q9ULC4     | Malignant    | 134.8066298 | 4  | 5  | 4 | 20.5  | 8.82  | 172 | 4  |
| P35610     | Sterol O-ac  | 8.90909091  | 4  | 6  | 4 | 64.7  | 8.94  | 137 | 4  |
| 060216     | Double-str   | 14.1045959  | 7  | 7  | 7 | 71.6  | 4.65  | 134 | 7  |
| AOA140VJP8 | Metallothi   | 67.2131148  | 4  | 7  | 1 | 6.1   | 7.96  | 180 | 4  |
| 043765     | Small glut   | 20.4472843  | 5  | 7  | 5 | 34    | 4.87  | 102 | 5  |
| Q96EE3     | Nucleoporin  | 21.3888889  | 6  | 6  | 6 | 39.6  | 8.09  | 67  | 6  |
| Q9Y6N5     | Sulfide:qui  | 22          | 7  | 7  | 7 | 49.9  | 9.11  | 132 | 7  |
| Q12873     | Chromodomai  | 3.95        | 6  | 7  | 2 | 226.5 | 7.3   | 100 | 6  |
| J3KNF8     | Cytochrome   | 31.3333333  | 2  | 6  | 2 | 16.7  | 4.97  | 121 | 2  |
| Q9BQ69     | O-acetyl-Al  | 28.3076923  | 5  | 5  | 5 | 35.5  | 9.51  | 99  | 5  |
| Q59FD4     | Hexokinase   | 9.37829294  | 7  | 8  | 7 | 105.7 | 6.84  | 140 | 7  |
| D3DWY7     | von Hippel-  | 41.6309013  | 7  | 10 | 7 | 26.5  | 9.01  | 82  | 7  |
| 000461     | GoIgi inte   | 9.33908046  | 5  | 6  | 5 | 81.8  | 4.77  | 72  | 5  |
| B2R774     | cDNA, FLJ9   | (21.372549  | 7  | 8  | 7 | 57.5  | 6.77  | 116 | 7  |
| 043615     | Mitochondri  | 18.1415929  | 7  | 9  | 7 | 51.3  | 8.32  | 185 | 7  |
| Q9BR76     | Coronin-1B   | 14.9284254  | 5  | 6  | 5 | 54.2  | 5.88  | 129 | 5  |
| Q5TFE4     | 5'-nucleoti  | 16.4835165  | 5  | 7  | 5 | 51.8  | 6.35  | 80  | 5  |
| 000193     | Small acid   | 28.9617486  | 3  | 4  | 3 | 20.3  | 4.72  | 169 | 3  |
| Q15067     | Peroxisomal  | 18.6363636  | 7  | 7  | 7 | 74.4  | 8.16  | 36  | 7  |
| J3KPP4     | Cisplatin    | 115.1329243 | 6  | 8  | 6 | 58.2  | 9.92  | 199 | 6  |
| P61970     | Nuclear tra  | 51.1811024  | 4  | 6  | 4 | 14.5  | 5.38  | 64  | 4  |
| Q8WV80     | MTAP protei  | 38.3116883  | 5  | 6  | 1 | 17    | 7.68  | 105 | 5  |
| Q9Y5A9     | YTH domain   | -11.0535406 | 5  | 7  | 4 | 62.3  | 8.79  | 146 | 5  |
| 060678     | Protein arg  | 16.5725047  | 6  | 7  | 6 | 59.8  | 5.35  | 116 | 6  |

|            |              |             |    |    |    |       |       |     |    |
|------------|--------------|-------------|----|----|----|-------|-------|-----|----|
| P57740     | Nuclear por  | 9.72972973  | 7  | 7  | 7  | 106.3 | 5.43  | 133 | 7  |
| Q9Y520     | Protein PRF  | 6.66436464  | 11 | 12 | 11 | 316.7 | 9.13  | 0   | 11 |
| AOA087WTWO | E3 ubiquitin | 11.4352392  | 8  | 8  | 8  | 96.6  | 8.34  | 108 | 8  |
| Q15654     | Thyroid rec  | 14.4957983  | 5  | 6  | 5  | 50.3  | 7.37  | 50  | 5  |
| Q13242     | Serine/argi  | 30.3167421  | 6  | 10 | 4  | 25.5  | 8.65  | 138 | 6  |
| Q59ET7     | Thioredoxin  | 14.6771037  | 5  | 8  | 4  | 55.2  | 7.34  | 218 | 5  |
| Q9HDC9     | Adipocyte p  | 27.4038462  | 7  | 10 | 7  | 46.5  | 6.16  | 0   | 7  |
| E7EQY1     | Protein FAM  | 26.122449   | 6  | 7  | 6  | 26.8  | 8.24  | 81  | 6  |
| Q96CP2     | FLYWCH fami  | 72.1428571  | 7  | 8  | 7  | 14.6  | 8.46  | 70  | 7  |
| P84085     | ADP-ribosyl  | 48.8888889  | 4  | 9  | 2  | 20.5  | 6.79  | 64  | 4  |
| Q9BQA1     | Methylosome  | 42.6900585  | 7  | 7  | 7  | 36.7  | 5.17  | 57  | 7  |
| O00625     | Pirin OS=Hc  | 46.8965517  | 8  | 8  | 8  | 32.1  | 6.92  | 49  | 8  |
| E5KS95     | Elongation   | 27.3846154  | 6  | 6  | 6  | 35.4  | 8.38  | 64  | 6  |
| P63279     | SUMO-conjug  | 47.0506329  | 7  | 7  | 7  | 18    | 8.66  | 119 | 7  |
| P19957     | Elafin OS=I  | 64.1025641  | 6  | 10 | 6  | 12.3  | 8.82  | 95  | 6  |
| Q59EN5     | Prosaposin   | 12.6415094  | 6  | 10 | 6  | 58.7  | 5.1   | 48  | 6  |
| P22570     | NADPH:adren  | 15.4786151  | 5  | 8  | 5  | 53.8  | 8.44  | 85  | 5  |
| Q9UHY7     | Enolase-phc  | 25.6704981  | 4  | 6  | 4  | 28.9  | 4.78  | 82  | 4  |
| B2R602     | cDNA, FLJ9   | 20.5513784  | 6  | 7  | 6  | 45.3  | 7.9   | 61  | 6  |
| D6RFN0     | COP9 signal  | 16.6666667  | 5  | 5  | 5  | 49.7  | 5.81  | 197 | 5  |
| O00487     | 26S proteas  | 25.1612903  | 6  | 7  | 6  | 34.6  | 6.52  | 185 | 6  |
| Q9Y570     | Protein phc  | 22.2797927  | 5  | 5  | 5  | 42.3  | 5.97  | 96  | 5  |
| Q96KP4     | Cytosolic r  | 31.3684211  | 10 | 10 | 10 | 52.8  | 5.97  | 85  | 10 |
| Q8WYP5     | Protein EL   | 3.83936452  | 7  | 8  | 7  | 252.3 | 6.6   | 195 | 7  |
| Q6IB54     | ATP synthas  | 55.5555556  | 5  | 8  | 5  | 12.6  | 9.52  | 109 | 5  |
| P62314     | Small nucle  | 37.8151261  | 3  | 7  | 3  | 13.3  | 11.56 | 118 | 3  |
| Q96G03     | Phosphogluc  | 16.503268   | 6  | 6  | 6  | 68.2  | 6.73  | 146 | 6  |
| P53701     | Cytochrome   | 35.4477612  | 7  | 8  | 7  | 30.6  | 6.68  | 57  | 7  |
| Q5SSJ5     | Heterochrom  | 16.636528   | 8  | 8  | 8  | 61.2  | 9.67  | 126 | 8  |
| Q9NX58     | Cell growth  | 14.2480211  | 4  | 6  | 4  | 43.6  | 9.54  | 165 | 4  |
| Q9Y2Z0     | Protein SG   | 17.5342466  | 5  | 6  | 5  | 41    | 5.16  | 120 | 5  |
| Q71RC2     | La-related   | 12.1546961  | 6  | 7  | 6  | 80.5  | 6.61  | 136 | 6  |
| Q14573     | Inositol 1,4 | .97940846   | 10 | 10 | 7  | 303.9 | 6.48  | 107 | 10 |
| P18085     | ADP-ribosyl  | 32.2222222  | 4  | 9  | 2  | 20.5  | 7.14  | 116 | 4  |
| G1AUC5     | Protein phc  | 23.902439   | 5  | 7  | 5  | 23.1  | 4.87  | 216 | 5  |
| Q3LXA3     | Triokinase   | 15.4782609  | 5  | 5  | 5  | 58.9  | 7.49  | 71  | 5  |
| G3V2S9     | SRA stem-lc  | 41.1290323  | 4  | 6  | 4  | 13.9  | 11.09 | 162 | 4  |
| B2RAH7     | cDNA, FLJ9   | 21.943662   | 6  | 7  | 6  | 80.7  | 5.86  | 61  | 6  |
| P51570     | Galactokin   | 22.7040816  | 6  | 6  | 6  | 42.2  | 6.46  | 89  | 6  |
| A8K6X9     | cDNA FLJ7    | 68.01364024 | 6  | 6  | 6  | 133.4 | 6.77  | 145 | 6  |
| Q6IA86     | Elongator c  | 12.9539952  | 6  | 7  | 6  | 92.4  | 5.96  | 51  | 6  |
| Q8NFM4     | Nucleoporin  | 16.5644172  | 4  | 5  | 4  | 36.7  | 5.92  | 142 | 4  |
| X6R8F3     | Neutrophil   | 33          | 4  | 4  | 4  | 22.8  | 8.5   | 144 | 4  |
| Q59GW7     | Replicator   | 26.2108262  | 6  | 7  | 6  | 39.6  | 7.81  | 52  | 6  |
| P07305     | Histone H1   | 25.7731959  | 6  | 8  | 6  | 20.9  | 10.84 | 149 | 6  |
| Q9NW82     | WD repeat    | 18.10397554 | 5  | 8  | 5  | 73.2  | 6.33  | 108 | 5  |
| AOA024RE04 | Uncharacter  | 19.6467991  | 5  | 6  | 5  | 52.1  | 8.47  | 116 | 5  |
| P68036     | Ubiquitin    | 16.4935065  | 5  | 5  | 2  | 17.9  | 8.51  | 59  | 5  |
| P61513     | 60S ribosom  | 42.3913043  | 4  | 7  | 4  | 10.3  | 10.43 | 221 | 4  |
| AOA024R648 | Translocase  | 52.8089888  | 3  | 4  | 3  | 10.4  | 7.21  | 94  | 3  |
| Q02750     | Dual speci   | 125.1908397 | 7  | 7  | 4  | 43.4  | 6.62  | 118 | 7  |
| Q14CX7     | N-alpha-acc  | 9.56790123  | 6  | 6  | 5  | 112.2 | 6.64  | 104 | 6  |
| P35573     | Glycogen de  | 6.13577023  | 9  | 10 | 9  | 174.7 | 6.76  | 106 | 9  |
| AOA140VJW2 | Stathmin O   | 31.6091954  | 5  | 9  | 5  | 19.8  | 7.02  | 287 | 5  |
| P61026     | Ras-relate   | 31          | 7  | 10 | 3  | 22.5  | 8.38  | 147 | 7  |
| B2RDR4     | cDNA, FLJ9   | 23.9904988  | 7  | 8  | 7  | 47.9  | 7.68  | 76  | 7  |
| Q9H7Z7     | Prostaglan   | 23.872679   | 4  | 4  | 4  | 41.9  | 9.16  | 124 | 4  |
| O60701     | UDP-glucos   | 24.6963563  | 9  | 9  | 9  | 55    | 7.12  | 150 | 9  |
| Q6P1J9     | Parafibromi  | 15.4425612  | 7  | 10 | 7  | 60.5  | 9.61  | 102 | 7  |
| O00154     | Cytosolic    | 21.5789474  | 7  | 8  | 7  | 41.8  | 8.54  | 107 | 7  |
| Q9BV38     | WD repeat    | 120.8333333 | 6  | 7  | 6  | 47.4  | 6.7   | 109 | 6  |
| Q9Y263     | Phospholip   | 13.3333333  | 7  | 8  | 7  | 87.1  | 6.37  | 148 | 7  |
| O15042     | U2 snRNP     | 18.84548105 | 6  | 11 | 5  | 118.2 | 8.47  | 77  | 6  |
| Q6FGG2     | VAMP3 prote  | 49          | 4  | 5  | 4  | 11.3  | 8.79  | 155 | 4  |
| AOA0S2Z497 | Peroxisomal  | 17.3913043  | 4  | 5  | 2  | 32.8  | 4.34  | 131 | 4  |
| Q96CT7     | Coiled-coil  | 28.2511211  | 7  | 10 | 7  | 25.8  | 9.54  | 87  | 7  |
| P62851     | 40S ribosom  | 32          | 6  | 10 | 6  | 13.7  | 10.11 | 155 | 6  |
| Q9H3U1     | Protein uncl | 14.4067797  | 10 | 10 | 10 | 103   | 6.07  | 48  | 10 |
| Q9UJX3     | Anaphase-p   | 13.6894825  | 5  | 7  | 5  | 66.8  | 5.64  | 115 | 5  |
| P54105     | Methylosome  | 23.628692   | 3  | 7  | 3  | 26.2  | 4.11  | 166 | 3  |
| B2R7C7     | Alkaline ph  | 18.317757   | 6  | 8  | 6  | 57.8  | 6.29  | 59  | 6  |
| P53634     | Dipeptidyl   | 18.574514   | 6  | 8  | 6  | 51.8  | 6.99  | 134 | 6  |
| Q9UHD9     | Ubiquitin    | 17.69230769 | 4  | 6  | 1  | 65.7  | 5.22  | 197 | 4  |
| AOA087WWE2 | DNA-direct   | 4.49494949  | 6  | 8  | 6  | 218.1 | 7.85  | 96  | 6  |
| Q9NZ45     | CDGSH iron   | 42.5925926  | 4  | 6  | 4  | 12.2  | 9.09  | 131 | 4  |
| Q1HBJ4     | Mitogen-act  | 18.6111111  | 4  | 5  | 4  | 41.4  | 6.98  | 87  | 4  |
| Q14116     | Interleukin  | 40.4145078  | 6  | 8  | 6  | 22.3  | 4.67  | 169 | 6  |



|            |                                |   |    |   |       |       |     |   |
|------------|--------------------------------|---|----|---|-------|-------|-----|---|
| Q969V3     | Nicalin OS=15.9857904          | 6 | 6  | 6 | 62.9  | 6.89  | 108 | 6 |
| O15160     | DNA-directo22.5433526          | 5 | 5  | 5 | 39.2  | 5.5   | 159 | 5 |
| Q12907     | Vesicular i16.5730337          | 3 | 3  | 3 | 40.2  | 6.95  | 101 | 3 |
| Q562L3     | Actin-like 45.631068           | 3 | 15 | 1 | 11.5  | 6.35  | 236 | 3 |
| Q59H06     | Transporter13.6363636          | 7 | 8  | 7 | 77.7  | 7.85  | 92  | 7 |
| Q06203     | Amidophosph16.4410058          | 6 | 6  | 6 | 57.4  | 6.76  | 107 | 6 |
| Q9UPN9     | E3 ubiquitin8.3407276          | 8 | 8  | 8 | 122.5 | 6.67  | 131 | 8 |
| Q96CS3     | FAS-associated15.7303371       | 5 | 7  | 5 | 52.6  | 5.62  | 82  | 5 |
| Q9NZ01     | Very-long-c11.3636364          | 4 | 6  | 4 | 36    | 9.45  | 71  | 4 |
| AOA024R7J0 | Protein kir22.7920228          | 8 | 8  | 8 | 40.6  | 8.79  | 125 | 8 |
| B2RDI5     | cDNA, FLJ9612.0448179          | 6 | 9  | 6 | 81.8  | 5.54  | 74  | 6 |
| P52815     | 39S ribosome23.2323232         | 5 | 8  | 5 | 21.3  | 8.87  | 141 | 5 |
| Q9H9B4     | Sideroflexin28.8819876         | 7 | 7  | 5 | 35.6  | 9.07  | 145 | 7 |
| Q6GMV3     | Putative protein61.4285714     | 5 | 5  | 5 | 15.8  | 9.1   | 40  | 5 |
| Q86UE4     | Protein LYF11.3402062          | 4 | 6  | 4 | 63.8  | 9.32  | 101 | 4 |
| P18615     | Negative element26.0526316     | 6 | 6  | 6 | 43.2  | 9.33  | 60  | 6 |
| Q5BKZ1     | DBIRD complex13.7457045        | 6 | 7  | 6 | 65.6  | 5.15  | 131 | 6 |
| P61224     | Ras-related34.2391304          | 5 | 6  | 5 | 20.8  | 5.78  | 133 | 5 |
| P78406     | mRNA export15.7608696          | 5 | 6  | 5 | 40.9  | 7.83  | 112 | 5 |
| P09543     | 2',3'-cyclic16.3895487         | 5 | 6  | 5 | 47.5  | 9.07  | 80  | 5 |
| P55039     | Development15.9340659          | 5 | 6  | 4 | 40.7  | 8.88  | 112 | 5 |
| AOA140VJX3 | Sulfurtransferase24.9158249    | 5 | 6  | 5 | 33.2  | 6.6   | 113 | 5 |
| Q969Q0     | 60S ribosome43.3962264         | 5 | 10 | 1 | 12.5  | 10.65 | 88  | 5 |
| Q15397     | Pumilio homolog14.1975309      | 7 | 7  | 7 | 73.5  | 9.64  | 135 | 7 |
| AOA024R2W3 | Protein kir21.2871287          | 6 | 6  | 6 | 45.5  | 5.07  | 122 | 6 |
| Q5U086     | Serine/threonine17.9153094     | 5 | 6  | 3 | 35.1  | 5.12  | 94  | 5 |
| P14635     | G2/mitotic-17.0900693          | 5 | 5  | 5 | 48.3  | 7.47  | 170 | 5 |
| P46459     | Vesicle-fusion9.54301075       | 6 | 6  | 6 | 82.5  | 6.95  | 115 | 6 |
| P20839     | Inosine-5'-22.3735409          | 9 | 10 | 7 | 55.4  | 6.9   | 102 | 9 |
| Q13616     | Cullin-1 O&11.9845361          | 7 | 8  | 7 | 89.6  | 8     | 103 | 7 |
| HOYMV8     | 40S ribosome36                 | 5 | 11 | 2 | 11.3  | 9.32  | 134 | 5 |
| P52294     | Importin subunit16.1710037     | 9 | 9  | 2 | 60.2  | 5.01  | 134 | 9 |
| P35321     | Cornifin-A 70.7865169          | 6 | 17 | 1 | 9.9   | 8.48  | 102 | 6 |
| Q8NI36     | WD repeat-c10.4100946          | 7 | 8  | 7 | 105.3 | 7.53  | 94  | 7 |
| Q68D08     | Putative ur23.7654321          | 5 | 5  | 5 | 36.7  | 6.06  | 121 | 5 |
| Q4LE38     | IKBKAP variant8.56929955       | 7 | 7  | 7 | 151.4 | 6     | 102 | 7 |
| Q9Y2V2     | Calcium-regulatory53.0612245   | 3 | 5  | 3 | 15.9  | 8.21  | 127 | 3 |
| AOA140VJR2 | Testicular 13.1845842          | 5 | 5  | 5 | 54.5  | 6     | 134 | 5 |
| AOA0S2Z5U3 | Heterogeneous13.2635253        | 5 | 7  | 4 | 63.6  | 7.3   | 110 | 5 |
| Q9H3N1     | Thioredoxin23.9285714          | 6 | 8  | 6 | 31.8  | 4.98  | 146 | 6 |
| Q01650     | Large neutral6.7061144         | 3 | 5  | 3 | 55    | 7.72  | 144 | 3 |
| 075436     | Vacuolar protein22.6299694     | 6 | 6  | 6 | 38.1  | 6.57  | 100 | 6 |
| Q8NI27     | THO complex5.64971751          | 6 | 6  | 6 | 182.7 | 8.44  | 115 | 6 |
| 000541     | Pescadillo 13.9455782          | 7 | 9  | 7 | 68    | 7.33  | 75  | 7 |
| Q96A33     | Coiled-coil22.1532091          | 8 | 9  | 8 | 55.8  | 4.87  | 50  | 8 |
| 075380     | NADH dehydrogenase61.2903226   | 5 | 6  | 5 | 13.7  | 8.28  | 143 | 5 |
| J3KQN4     | 60S ribosome32.3943662         | 5 | 10 | 1 | 16.4  | 10.43 | 83  | 5 |
| Q53GW1     | Vesicle trafficking17.1339564  | 6 | 6  | 6 | 72.3  | 6.38  | 76  | 6 |
| P18858     | DNA ligase9.68443961           | 6 | 6  | 6 | 101.7 | 5.62  | 44  | 6 |
| 095881     | Thioredoxin40.1162791          | 6 | 9  | 6 | 19.2  | 5.4   | 81  | 6 |
| P08648     | Integrin alpha8.6749285        | 6 | 6  | 6 | 114.5 | 5.77  | 137 | 6 |
| Q13243     | Serine/arginine18.0147059      | 5 | 7  | 4 | 31.2  | 11.59 | 159 | 5 |
| AOA024R8A2 | GTPase activator6.05245461     | 8 | 8  | 8 | 166.1 | 5.21  | 146 | 8 |
| AOA024QZF1 | HCG19665, iso10.1532567        | 3 | 4  | 3 | 53.2  | 5.31  | 85  | 3 |
| 075400     | Pre-mRNA processing6.5830721   | 5 | 8  | 5 | 108.7 | 7.56  | 152 | 5 |
| P14854     | Cytochrome b5.5813953          | 4 | 7  | 4 | 10.2  | 7.05  | 70  | 4 |
| Q5T1J5     | Putative coiled-coil27.1523179 | 2 | 4  | 2 | 15.5  | 9.89  | 57  | 2 |
| Q9ULW0     | Targeting protein11.5127175    | 7 | 7  | 7 | 85.6  | 9.23  | 91  | 7 |
| Q5STK2     | Prefoldin subunit38.7596899    | 5 | 7  | 5 | 14.6  | 8.88  | 119 | 5 |
| Q69YJ7     | Putative ur7.96645702          | 7 | 8  | 7 | 100.1 | 8.91  | 37  | 7 |
| 060341     | Lysine-specific10.3286385      | 5 | 5  | 5 | 92.8  | 6.52  | 99  | 5 |
| P21281     | V-type proton9.5890411         | 4 | 6  | 4 | 56.5  | 5.81  | 77  | 4 |
| 075947     | ATP synthase42.8571429         | 6 | 8  | 6 | 18.5  | 5.3   | 108 | 6 |
| 043660     | Pleiotropic15.5642023          | 5 | 6  | 5 | 57.2  | 9.17  | 105 | 5 |
| A4DOV4     | Capping protein22.027972       | 5 | 7  | 3 | 32.9  | 5.85  | 169 | 5 |
| Q8TDD1     | ATP-dependent8.17253121        | 5 | 7  | 5 | 98.5  | 10.02 | 118 | 5 |
| P35325     | Small protein61.1111111        | 4 | 13 | 1 | 8     | 8.43  | 75  | 4 |
| Q9NU22     | Midasin OS=1.19728377          | 6 | 7  | 6 | 632.4 | 5.68  | 183 | 6 |
| DOEKE5     | Peptidylprotease17.8041543     | 5 | 5  | 5 | 38.5  | 6.84  | 99  | 5 |
| Q8IWA0     | WD repeat-c9.27710843          | 5 | 7  | 5 | 94.4  | 5.96  | 89  | 5 |
| Q9Y305     | Acyl-coenzyme17.5398633        | 5 | 7  | 5 | 49.9  | 8.6   | 75  | 5 |
| P61964     | WD repeat-c23.9520958          | 5 | 5  | 5 | 36.6  | 8.27  | 71  | 5 |
| 060232     | Sjoegren syndrome46.2311558    | 4 | 4  | 4 | 21.5  | 5.24  | 151 | 4 |
| Q96PZ0     | Pseudouridylyl13.3131619       | 6 | 7  | 6 | 75    | 6.37  | 59  | 6 |
| Q9NY93     | Probable A1 15.904936          | 5 | 7  | 5 | 61.6  | 9.26  | 118 | 5 |
| L7RSM2     | Mitogen-activated20.8333333    | 5 | 6  | 4 | 41.5  | 5.88  | 91  | 5 |
| 095817     | BAG family 15.826087           | 5 | 6  | 5 | 61.6  | 6.95  | 131 | 5 |

|            |             |             |   |    |   |       |       |     |   |
|------------|-------------|-------------|---|----|---|-------|-------|-----|---|
| Q9H814     | Phosphorylε | 9.64467005  | 3 | 4  | 3 | 44.4  | 5.4   | 157 | 3 |
| P15559     | NAD(P)H de  | 30.2919708  | 7 | 9  | 7 | 30.8  | 8.88  | 75  | 7 |
| Q9NUQ3     | Gamma-taxil | 23.2954545  | 9 | 9  | 8 | 60.5  | 7.52  | 47  | 9 |
| Q9NRF9     | DNA polymei | 42.8571429  | 5 | 7  | 5 | 16.8  | 4.74  | 107 | 5 |
| Q9Y4W6     | AFG3-like f | 13.0489335  | 7 | 7  | 7 | 88.5  | 8.66  | 112 | 7 |
| P49458     | Signal recc | 56.9767442  | 5 | 5  | 5 | 10.1  | 7.97  | 130 | 5 |
| Q96KB5     | Lymphokine- | 33.8509317  | 6 | 7  | 6 | 36.1  | 5.12  | 49  | 6 |
| Q4GON4     | NAD kinase  | 15.158371   | 5 | 5  | 5 | 49.4  | 8.18  | 125 | 5 |
| AOMNN4     | CDW3/SMU1   | (13.0604288 | 6 | 8  | 6 | 57.5  | 7.18  | 118 | 6 |
| AOA024R1U2 | PHD finger  | 55.4545455  | 5 | 5  | 5 | 12.4  | 8.41  | 153 | 5 |
| F6RGN5     | Mitochondri | 14.0394089  | 3 | 4  | 3 | 43.6  | 9.25  | 137 | 3 |
| AOA0U1RRM6 | Protein enε | 9.60099751  | 6 | 7  | 6 | 87.3  | 7.77  | 44  | 6 |
| D6RDG3     | Transcripti | 33.0275229  | 3 | 7  | 1 | 11.8  | 5.9   | 266 | 3 |
| P04040     | Catalase Oε | 14.2314991  | 5 | 5  | 5 | 59.7  | 7.39  | 92  | 5 |
| Q8WXX5     | DnaJ homolc | 23.0769231  | 4 | 5  | 4 | 29.9  | 5.73  | 57  | 4 |
| P46977     | Dolichyl-di | 8.5106383   | 4 | 5  | 4 | 80.5  | 8.07  | 89  | 4 |
| Q59HG1     | Chromosome- | 5.50607287  | 6 | 6  | 6 | 140.3 | 6.27  | 66  | 6 |
| Q6DN03     | Putative hi | 17.6165803  | 5 | 12 | 1 | 21.5  | 10.7  | 73  | 5 |
| Q96SB4     | SRSF protei | 15.1145038  | 7 | 9  | 6 | 74.3  | 6.16  | 108 | 7 |
| F5H1H2     | Cell divisi | 13.4674923  | 7 | 8  | 1 | 75.7  | 8     | 70  | 7 |
| P49902     | Cytosolic f | 9.80392157  | 3 | 4  | 3 | 64.9  | 6.14  | 57  | 3 |
| AOA024R8Z9 | Aspartyl-tf | 11.9379845  | 5 | 5  | 5 | 73.5  | 8.02  | 134 | 5 |
| X5D299     | Aldehyde de | 14.7810219  | 5 | 5  | 5 | 58.6  | 8.09  | 144 | 5 |
| Q9UKN8     | General tra | 12.8953771  | 6 | 6  | 6 | 91.9  | 6.65  | 55  | 6 |
| Q9H8Y8     | Golgi reas  | 17.2566372  | 5 | 6  | 5 | 47.1  | 4.82  | 122 | 5 |
| AOA140VJMO | Testicular  | 7.61179829  | 7 | 9  | 7 | 116.5 | 6.77  | 90  | 7 |
| Q9NYJ1     | Cytochrome  | 60.9195402  | 3 | 4  | 3 | 10.1  | 6.04  | 76  | 3 |
| Q9NP79     | Vacuolar pi | 14.0065147  | 3 | 8  | 3 | 33.9  | 6.29  | 148 | 3 |
| Q9NTJ5     | Phosphatidy | 13.2879046  | 8 | 9  | 8 | 66.9  | 7.12  | 114 | 8 |
| Q9BXW7     | Cat eye syr | 21.9858156  | 5 | 6  | 5 | 46.3  | 8.13  | 59  | 5 |
| Q9NQT4     | Exosome con | 26.8085106  | 4 | 4  | 4 | 25.2  | 7.59  | 131 | 4 |
| AOA140VKAO | Caldesmon   | 115.7992565 | 6 | 7  | 6 | 62.6  | 6.37  | 84  | 6 |
| Q14TF0     | Glutamate-c | 10.0470958  | 5 | 7  | 5 | 72.7  | 6.09  | 76  | 5 |
| Q969G3     | SWI/SNF-rel | 13.3819951  | 4 | 4  | 4 | 46.6  | 4.88  | 122 | 4 |
| Q53GS9     | U4/U6.U5 t  | 12.2123894  | 6 | 8  | 5 | 65.3  | 8.91  | 127 | 6 |
| J3KQ32     | Obg-like A  | 120.1923077 | 6 | 6  | 6 | 46.9  | 8.06  | 50  | 6 |
| Q06124     | Tyrosine-pi | 18.760469   | 7 | 7  | 7 | 68.4  | 7.3   | 76  | 7 |
| 075691     | Small subu  | 3.77019749  | 9 | 9  | 9 | 318.2 | 7.39  | 93  | 9 |
| Q9BUP3     | Oxidoreduct | 21.0743802  | 6 | 8  | 6 | 27    | 8.38  | 121 | 6 |
| Q9GZL7     | Ribosome bi | 16.0756501  | 5 | 5  | 5 | 47.7  | 5.9   | 92  | 5 |
| Q9Y316     | Protein MEA | 26.5993266  | 5 | 5  | 5 | 33.7  | 7.14  | 152 | 5 |
| P49903     | Selenide, v | 25.255102   | 6 | 6  | 6 | 42.9  | 5.97  | 0   | 6 |
| Q6FIE5     | PHP14 prote | 53.6        | 4 | 6  | 4 | 13.8  | 6.07  | 53  | 4 |
| Q9NRV9     | Heme-bindir | 38.6243386  | 5 | 5  | 5 | 21.1  | 5.8   | 60  | 5 |
| J3QRS3     | Myosin reg  | 33.3333333  | 4 | 4  | 4 | 20.4  | 4.75  | 159 | 4 |
| Q9UBF2     | Coatomer st | 5.97014925  | 4 | 7  | 2 | 97.6  | 5.81  | 121 | 4 |
| Q8IUE6     | Histone H2  | 67.6923077  | 5 | 11 | 1 | 14    | 10.89 | 128 | 5 |
| P61764     | Syntaxin-bi | 12.962963   | 5 | 5  | 5 | 67.5  | 6.96  | 70  | 5 |
| Q8WW12     | PEST protec | 26.9662921  | 4 | 5  | 4 | 18.9  | 7.49  | 142 | 4 |
| J3KNL6     | Protein tra | 4.45481544  | 6 | 6  | 6 | 251.7 | 5.8   | 50  | 6 |
| P35658     | Nuclear poi | 4.25837321  | 7 | 8  | 7 | 213.5 | 7.47  | 70  | 7 |
| Q9BPW8     | Protein Ni  | 29.5774648  | 5 | 5  | 5 | 33.3  | 9.31  | 0   | 5 |
| B2R4A2     | Cytochrome  | 46.8468468  | 4 | 5  | 4 | 13.5  | 8.27  | 21  | 4 |
| Q8WVV4     | Protein POF | 13.7521222  | 6 | 6  | 6 | 68    | 6.32  | 66  | 6 |
| Q96GM5     | SWI/SNF-rel | 15.3398058  | 5 | 5  | 3 | 58.2  | 9.25  | 114 | 5 |
| Q6PJJ2     | RRP1 protei | 16.0944206  | 7 | 8  | 7 | 53.4  | 9.48  | 99  | 7 |
| A6NDG6     | Glycerol-3- | 24.2990654  | 5 | 6  | 5 | 34    | 6.14  | 91  | 5 |
| Q14232     | Translatior | 27.2131148  | 6 | 7  | 6 | 33.7  | 7.33  | 75  | 6 |
| P53611     | Geranylger  | 13.5951662  | 4 | 5  | 4 | 36.9  | 5.03  | 123 | 4 |
| H3BS72     | Very-long-c | 15          | 5 | 8  | 5 | 47.1  | 8.85  | 110 | 5 |
| Q9H910     | Hematologic | 40          | 6 | 8  | 6 | 20.1  | 9.26  | 63  | 6 |
| Q969H8     | Myeloid-de  | 30.0578035  | 4 | 6  | 4 | 18.8  | 6.68  | 121 | 4 |
| AOA140T9T7 | Antigen pep | 6.43564356  | 3 | 4  | 3 | 87.1  | 8.02  | 138 | 3 |
| Q9HCY8     | Protein SI  | (50.9615385 | 4 | 7  | 4 | 11.7  | 5.24  | 123 | 4 |
| X6R5Z6     | Cytochrome  | 27.0967742  | 3 | 4  | 3 | 18    | 10.1  | 108 | 3 |
| P82650     | 28S ribosom | 18.6111111  | 4 | 5  | 4 | 41.3  | 7.9   | 120 | 4 |
| Q9BW92     | Threonine-- | 10.724234   | 6 | 6  | 5 | 81    | 7.3   | 72  | 6 |
| AOA096LP16 | Uncharacter | 20.7885305  | 5 | 7  | 5 | 30.5  | 7.87  | 64  | 5 |
| P61011     | Signal recc | 20.4365079  | 6 | 6  | 6 | 55.7  | 8.75  | 49  | 6 |
| P49643     | DNA primase | 14.1453831  | 6 | 6  | 6 | 58.8  | 7.91  | 130 | 6 |
| Q8N684     | Cleavage ar | 11.4649682  | 4 | 5  | 4 | 52    | 8     | 96  | 4 |
| A8K4B4     | cDNA FLJ78  | ε18.5941043 | 6 | 6  | 6 | 49.4  | 9.89  | 104 | 6 |
| E5KS60     | Succinate-- | 15.5507559  | 6 | 7  | 6 | 50.3  | 7.42  | 122 | 6 |
| AOA0G2JK23 | Large proli | 6.89045936  | 7 | 8  | 7 | 119.3 | 5.6   | 81  | 7 |
| Q549C5     | HCG2010808  | ,33.8028169 | 3 | 6  | 3 | 15.5  | 4.34  | 161 | 3 |
| Q86U42     | Polyadenyl  | ε13.0718954 | 3 | 4  | 3 | 32.7  | 5.06  | 138 | 3 |
| AOA087WT20 | DDB1- and   | (13.5678392 | 7 | 7  | 7 | 67.5  | 9.29  | 82  | 7 |

|            |                        |   |    |   |       |       |     |   |
|------------|------------------------|---|----|---|-------|-------|-----|---|
| A8KAQ6     | cDNA FLJ76432.9268293  | 7 | 9  | 7 | 45.8  | 8.79  | 58  | 7 |
| AOA024RC37 | Uncharacteri22.1153846 | 5 | 5  | 4 | 35.7  | 7.55  | 100 | 5 |
| P28072     | Proteasome 26.7782427  | 5 | 7  | 5 | 25.3  | 4.92  | 157 | 5 |
| O15397     | Importin-8 8.1002893   | 6 | 6  | 5 | 119.9 | 5.16  | 126 | 6 |
| Q99622     | Protein C1(49.2063492  | 4 | 4  | 4 | 13.2  | 5.14  | 69  | 4 |
| Q9HCD5     | Nuclear rec15.1986183  | 6 | 6  | 6 | 65.5  | 9.6   | 115 | 6 |
| B2R7E8     | cDNA, FLJ947.7777778   | 5 | 6  | 5 | 29.2  | 6.15  | 113 | 5 |
| A6NMQ1     | DNA polymer5.72207084  | 9 | 9  | 9 | 166.4 | 5.81  | 68  | 9 |
| B4DP80     | NAD(P)H-hyc27.6872964  | 6 | 8  | 6 | 33.6  | 8.73  | 66  | 6 |
| O96008     | Mitochondri13.5734072  | 3 | 5  | 3 | 37.9  | 7.25  | 50  | 3 |
| F8VVA7     | Coatome st24.2424242   | 3 | 4  | 3 | 22.3  | 4.89  | 102 | 3 |
| AOAOS2Z5U6 | Pyrroline-t 19.0625    | 4 | 5  | 3 | 33.6  | 7.77  | 113 | 4 |
| Q9HOS4     | Probable A120.2197802  | 6 | 7  | 6 | 50.6  | 9.1   | 58  | 6 |
| AOA087WUC6 | Signal pept28.6343612  | 6 | 7  | 6 | 25.1  | 8.47  | 147 | 6 |
| P09669     | Cytochrome 29.3333333  | 2 | 5  | 2 | 8.8   | 10.39 | 52  | 2 |
| Q8N183     | Mimitin, mi35.5029586  | 3 | 3  | 3 | 19.8  | 8.97  | 113 | 3 |
| Q12888     | Tumor suppr3.44827586  | 4 | 4  | 4 | 213.4 | 4.7   | 115 | 4 |
| V9HW87     | Abhydrolase38.5714286  | 5 | 6  | 5 | 22.3  | 6.4   | 109 | 5 |
| Q86W42     | TH0 comple14.6627566   | 4 | 5  | 4 | 37.5  | 7.43  | 92  | 4 |
| B4DWX3     | Importin st 20.702403  | 9 | 11 | 2 | 60.5  | 5.02  | 99  | 9 |
| Q6AI02     | Putative ur5.52396426  | 5 | 5  | 5 | 140.9 | 5.5   | 61  | 5 |
| P49207     | 60S ribosom41.8803419  | 9 | 10 | 9 | 13.3  | 11.47 | 130 | 9 |
| 000479     | High mobili46.6666667  | 4 | 8  | 3 | 9.5   | 10.48 | 84  | 4 |
| Q14126     | Desmoglein-7.33452594  | 4 | 4  | 4 | 122.2 | 5.24  | 83  | 4 |
| B4DZF8     | Serine/thre 20.855615  | 4 | 6  | 4 | 42.1  | 5.8   | 48  | 4 |
| P34949     | Mannose-6-P16.5484634  | 4 | 5  | 4 | 46.6  | 5.95  | 79  | 4 |
| 000273     | DNA fragmer19.0332326  | 5 | 6  | 5 | 36.5  | 4.79  | 121 | 5 |
| B2R4V4     | cDNA, FLJ9475.2808989  | 6 | 8  | 1 | 10    | 6.09  | 75  | 6 |
| Q9H8H0     | Nucleolar p10.2920723  | 5 | 5  | 5 | 81.1  | 6.07  | 115 | 5 |
| P10606     | Cytochrome 45.7364341  | 5 | 11 | 5 | 13.7  | 8.81  | 113 | 5 |
| D6RF35     | Vitamin D-t14.9159664  | 6 | 6  | 6 | 53    | 5.52  | 77  | 6 |
| AOA1B0GUA3 | KIF1-bindir19.8142415  | 6 | 8  | 6 | 74.7  | 5.76  | 120 | 6 |
| P34896     | Serine hydr12.4223602  | 5 | 8  | 4 | 53    | 7.71  | 154 | 5 |
| Q9Y5X3     | Sorting ne17.5742574   | 6 | 7  | 6 | 46.8  | 6.76  | 78  | 6 |
| Q9NRG9     | Aladin OS-F 13.003663  | 5 | 6  | 5 | 59.5  | 7.5   | 117 | 5 |
| AOAOS2Z381 | Adenosine c16.2534435  | 4 | 5  | 4 | 40.7  | 5.95  | 90  | 4 |
| Q9Y6M9     | NADH dehydr53.6312849  | 6 | 6  | 6 | 21.8  | 8.38  | 47  | 6 |
| P49821     | NADH dehydr15.3017241  | 4 | 4  | 4 | 50.8  | 8.21  | 113 | 4 |
| Q15437     | Protein tra6.64928292  | 4 | 7  | 3 | 86.4  | 6.89  | 104 | 4 |
| A3F768     | NF-kappaB p13.4782609  | 7 | 7  | 7 | 77.5  | 8.73  | 60  | 7 |
| 000499     | Myc box-dep12.3102867  | 5 | 6  | 4 | 64.7  | 5.06  | 60  | 5 |
| B4DNCO     | cDNA FLJ61112.0437956  | 3 | 5  | 3 | 30.6  | 8.37  | 106 | 3 |
| Q52LJ0     | Protein FAM11.2121212  | 3 | 3  | 3 | 37.2  | 6.29  | 170 | 3 |
| P21399     | Cytoplasmic9.67379078  | 5 | 5  | 5 | 98.3  | 6.68  | 47  | 5 |
| Q08170     | Serine/argi11.5384615  | 5 | 8  | 2 | 56.6  | 11.52 | 165 | 5 |
| Q13595     | Transformer 19.858156  | 6 | 7  | 5 | 32.7  | 11.27 | 62  | 6 |
| Q6WKZ4     | Rab11 famil13.58534684 | 4 | 5  | 4 | 137.1 | 5.43  | 102 | 4 |
| P82933     | 28S ribosom11.3636364  | 3 | 4  | 3 | 45.8  | 9.51  | 137 | 3 |
| Q9Y3Y2     | Chromatin t20.9677419  | 4 | 6  | 4 | 26.4  | 12.23 | 149 | 4 |
| Q9HOB6     | Kinesin lig10.1286174  | 4 | 4  | 1 | 68.9  | 7.15  | 98  | 4 |
| O43795     | Unconventic5.28169014  | 4 | 4  | 4 | 131.9 | 9.38  | 95  | 4 |
| AOA140VKC8 | Testis tis17.4454829   | 4 | 4  | 4 | 35.9  | 6.6   | 63  | 4 |
| Q16762     | Thiosulfate25.2525253  | 5 | 5  | 5 | 33.4  | 7.25  | 105 | 5 |
| Q05932     | Folylpolygl10.7325383  | 4 | 5  | 4 | 64.6  | 7.94  | 98  | 4 |
| Q16643     | Drebrin OS-6.62557781  | 4 | 4  | 4 | 71.4  | 4.45  | 155 | 4 |
| Q99426     | Tubulin-fol20.0819672  | 4 | 4  | 4 | 27.3  | 5.15  | 145 | 4 |
| P18077     | 60S ribosom44.5454545  | 9 | 12 | 9 | 12.5  | 11.06 | 106 | 9 |
| Q59EK3     | Adaptor-rel12.2317597  | 5 | 6  | 4 | 53.2  | 8.88  | 95  | 5 |
| AOA0U1RQJ0 | Probable A169.6428571  | 3 | 5  | 1 | 6.1   | 8.24  | 110 | 3 |
| B4DPD5     | Ubiquitin t22.0779221  | 6 | 6  | 6 | 35.2  | 5.59  | 85  | 6 |
| Q14008     | Cytoskeletc3.74015748  | 5 | 5  | 5 | 225.4 | 7.8   | 98  | 5 |
| Q9NX24     | H/ACA ribor24.8366013  | 2 | 4  | 2 | 17.2  | 8.22  | 97  | 2 |
| Q5RKV6     | Exosome con36.3970588  | 6 | 7  | 6 | 28.2  | 6.28  | 90  | 6 |
| G3V5T9     | Cyclin-depe20.2312139  | 5 | 6  | 3 | 39.2  | 8.62  | 134 | 5 |
| Q9UBS4     | DnaJ homolc13.1284916  | 3 | 4  | 3 | 40.5  | 6.18  | 105 | 3 |
| K7EQW8     | Tropomyosin52.5423729  | 5 | 7  | 0 | 6.8   | 4.84  | 109 | 5 |
| O43324     | Eukaryotic 41.954023   | 5 | 6  | 5 | 19.8  | 8.54  | 184 | 5 |
| AOA068F658 | Glucosylcer9.51492537  | 4 | 5  | 4 | 59.7  | 7.61  | 51  | 4 |
| F8WCF6     | Actin-relat21.5469613  | 4 | 5  | 4 | 21    | 8.76  | 178 | 4 |
| B2R9X3     | cDNA, FLJ947.11.827957 | 3 | 4  | 3 | 41.8  | 7.12  | 99  | 3 |
| Q9H6F5     | Coiled-coil13.6111111  | 4 | 6  | 4 | 40.2  | 10.33 | 75  | 4 |
| Q99575     | Ribonucleas8.69140625  | 6 | 6  | 6 | 114.6 | 9.22  | 53  | 6 |
| Q96AT9     | Ribulose-ph12.7192982  | 2 | 4  | 2 | 24.9  | 5.58  | 117 | 2 |
| Q86Y56     | Dynein assc7.95321637  | 4 | 4  | 4 | 93.5  | 6.42  | 67  | 4 |
| A8K878     | Mesencephal43.2432432  | 5 | 8  | 5 | 21.1  | 8.92  | 52  | 5 |
| P23193     | Transcriptil4.9501661  | 4 | 6  | 4 | 33.9  | 8.38  | 105 | 4 |
| O60568     | Procollager8.94308943  | 5 | 5  | 5 | 84.7  | 6.05  | 90  | 5 |

|            |               |             |   |    |   |       |       |     |   |
|------------|---------------|-------------|---|----|---|-------|-------|-----|---|
| V9GZ56     | U6 snRNA-ac   | 18.907563   | 5 | 6  | 5 | 25.7  | 10.15 | 58  | 5 |
| Q504R6     | RAB13 prote   | 27.4590164  | 6 | 7  | 4 | 27.2  | 8.9   | 167 | 6 |
| Q5SRE5     | Nucleoporin   | 5.48885077  | 6 | 7  | 6 | 195.9 | 6.73  | 76  | 6 |
| Q92876     | Kallikrein-22 | 1311475     | 3 | 5  | 3 | 26.8  | 7.44  | 39  | 3 |
| Q15418     | Ribosomal r   | 12.244898   | 6 | 6  | 3 | 82.7  | 7.83  | 84  | 6 |
| G5E977     | Nicotinate    | 17.1232877  | 5 | 5  | 5 | 62.1  | 6.73  | 87  | 5 |
| Q9Y3D0     | Mitotic sp    | 30.6748466  | 3 | 3  | 3 | 17.7  | 5.19  | 99  | 3 |
| S4R3N1     | HSPE1-MOB4    | 20.3065134  | 7 | 14 | 2 | 29.7  | 6.16  | 153 | 7 |
| Q15286     | Ras-related   | 23.3830846  | 4 | 7  | 2 | 23    | 8.29  | 133 | 4 |
| Q8TC12     | Retinol de    | 18.5534591  | 5 | 5  | 5 | 35.4  | 8.82  | 138 | 5 |
| Q05048     | Cleavage s    | 16.2412993  | 6 | 6  | 6 | 48.3  | 6.58  | 62  | 6 |
| Q96T76     | MMS19 nucl    | 8.83495146  | 6 | 7  | 6 | 113.2 | 6.35  | 70  | 6 |
| O00233     | 26S protea    | 28.6995516  | 6 | 8  | 6 | 24.7  | 6.95  | 127 | 6 |
| Q53H82     | Endoribonu    | 20.8333333  | 5 | 6  | 5 | 32.8  | 6.8   | 63  | 5 |
| Q9NX55     | Huntingtin    | 48.8372093  | 3 | 4  | 3 | 14.7  | 4.93  | 54  | 3 |
| P11234     | Ras-related   | 23.3009709  | 4 | 5  | 2 | 23.4  | 6.62  | 119 | 4 |
| E7EW49     | CLIP-associ   | 5.54821664  | 6 | 7  | 4 | 165.6 | 8.25  | 92  | 6 |
| P62306     | Small nucl    | 83.7209302  | 4 | 9  | 4 | 9.7   | 4.67  | 63  | 4 |
| Q5SRQ6     | Casein kin    | 34.6153846  | 5 | 6  | 5 | 26.9  | 5.96  | 59  | 5 |
| Q9Y2L1     | Exosome co    | 8.14196242  | 5 | 5  | 5 | 108.9 | 7.14  | 65  | 5 |
| Q9H488     | GDP-fucose    | 9.53608247  | 3 | 4  | 3 | 43.9  | 8.53  | 145 | 3 |
| Q96I20     | PRKC apopt    | 22.3529412  | 5 | 8  | 5 | 36.5  | 5.41  | 105 | 5 |
| Q9BVJ6     | U3 small nt   | 8.94941634  | 5 | 6  | 5 | 87.9  | 7.87  | 79  | 5 |
| P51116     | Fragile X m   | 11.8870728  | 5 | 5  | 4 | 74.2  | 6.23  | 117 | 5 |
| AOA0A0MTH3 | Integrin-li   | 12.6293996  | 4 | 4  | 4 | 54.6  | 7.97  | 113 | 4 |
| HOY886     | NADH dehyd    | 20.8737864  | 3 | 4  | 3 | 23.5  | 9.6   | 83  | 3 |
| Q9BZE1     | 39S riboso    | 16.3120567  | 5 | 7  | 5 | 48.1  | 8.59  | 93  | 5 |
| Q5T3I0     | G patch do    | 12.1076233  | 4 | 4  | 4 | 50.4  | 9.63  | 192 | 4 |
| Q15819     | Ubiquitin-c   | 40.6896552  | 6 | 6  | 3 | 16.4  | 8.09  | 107 | 6 |
| Q9BYT8     | Neurolysin    | 13.4943182  | 6 | 6  | 6 | 80.6  | 6.64  | 72  | 6 |
| Q9P2I0     | Cleavage ar   | 9.4629156   | 5 | 5  | 5 | 88.4  | 5.11  | 64  | 5 |
| O43237     | Cytoplasmic   | 12.398374   | 4 | 5  | 4 | 54.1  | 6.38  | 103 | 4 |
| O75934     | Pre-mRNA-s    | 21.3333333  | 3 | 4  | 3 | 26.1  | 5.66  | 62  | 3 |
| Q15056     | Eukaryotic    | 25.8064516  | 6 | 8  | 3 | 27.4  | 7.23  | 84  | 6 |
| P11233     | Ras-related   | 18.9320388  | 3 | 4  | 1 | 23.6  | 7.11  | 81  | 3 |
| Q9UNS2     | COP9 signal   | 17.7304965  | 5 | 5  | 5 | 47.8  | 6.65  | 37  | 5 |
| Q05DF2     | SF3A2 prote   | 15.3846154  | 6 | 6  | 6 | 51.4  | 10.11 | 60  | 6 |
| Q9UBB4     | Ataxin-10     | (13.4736842 | 4 | 7  | 4 | 53.5  | 5.25  | 89  | 4 |
| Q5VT52     | Regulation    | 4.79123888  | 4 | 4  | 4 | 155.9 | 7.42  | 68  | 4 |
| AOA0S2Z5L1 | ATP-binding   | 7.33427362  | 4 | 9  | 4 | 79.7  | 6.34  | 112 | 4 |
| P19784     | Casein kin    | 20.5714286  | 5 | 6  | 4 | 41.2  | 8.56  | 78  | 5 |
| P27338     | Amine oxid    | 11.1538462  | 6 | 6  | 6 | 58.7  | 7.5   | 110 | 6 |
| AOA024R7C5 | Mitochondri   | 24.7588424  | 4 | 6  | 4 | 34.9  | 9.72  | 58  | 4 |
| P53985     | Monocarboxy   | 7.2         | 3 | 5  | 3 | 53.9  | 8.66  | 70  | 3 |
| Q15126     | Phosphomev    | 32.2916667  | 4 | 5  | 4 | 22    | 5.73  | 123 | 4 |
| Q9H583     | HEAT repeat   | 2.79850746  | 5 | 5  | 3 | 242.2 | 6.54  | 67  | 5 |
| Q9H223     | EH domain-c   | 11.8299445  | 5 | 5  | 5 | 61.1  | 6.76  | 101 | 5 |
| P20930     | Filaggrin     | (4.38315686 | 3 | 5  | 3 | 434.9 | 9.25  | 130 | 3 |
| P10253     | Lysosomal     | 4.93697479  | 3 | 4  | 3 | 105.3 | 6     | 111 | 3 |
| P05204     | Non-histone   | 25.5555556  | 2 | 8  | 1 | 9.4   | 9.99  | 69  | 2 |
| B8ZZN6     | Small ubiq    | 28.7671233  | 4 | 6  | 4 | 16.6  | 6.2   | 89  | 4 |
| P07197     | Neurofilam    | 1.8558952   | 3 | 7  | 1 | 102.4 | 4.91  | 48  | 3 |
| Q12769     | Nuclear por   | 4.59610028  | 5 | 5  | 5 | 162   | 5.5   | 48  | 5 |
| Q92665     | 28S riboso    | 12.9113924  | 4 | 4  | 4 | 45.3  | 9.29  | 141 | 4 |
| D6RBW1     | Eukaryotic    | 20          | 6 | 8  | 6 | 28.5  | 8.12  | 107 | 6 |
| Q9UK59     | Lariat deb    | 12.6838235  | 5 | 5  | 5 | 61.5  | 5.47  | 91  | 5 |
| P15104     | Glutamine     | 12.6005362  | 3 | 3  | 3 | 42    | 6.89  | 107 | 3 |
| B3KNC3     | cDNA FLJ14    | 10.1468625  | 7 | 7  | 7 | 84.9  | 5.62  | 70  | 7 |
| AOA140VJZ4 | Ubiquitin c   | 23.0434783  | 4 | 4  | 4 | 26.2  | 4.92  | 97  | 4 |
| P19525     | Interferon-   | 13.430127   | 5 | 5  | 5 | 62.1  | 8.4   | 91  | 5 |
| Q6IBN6     | CBX1 prote    | 28.1081081  | 4 | 6  | 3 | 21.4  | 4.93  | 187 | 4 |
| P20339     | Ras-related   | 25.5813953  | 5 | 6  | 2 | 23.6  | 8.15  | 114 | 5 |
| X6RAL5     | Histone de    | 36.0465116  | 5 | 6  | 5 | 19.5  | 9.8   | 106 | 5 |
| P23368     | NAD-depend    | 14.8972603  | 5 | 5  | 5 | 65.4  | 7.61  | 55  | 5 |
| Q86TC9     | Myopalladi    | 5.90909091  | 4 | 7  | 3 | 145.2 | 6.77  | 53  | 4 |
| Q9BQ39     | ATP-depend    | 5.02035278  | 3 | 4  | 2 | 82.5  | 9.17  | 136 | 3 |
| P30837     | Aldehyde de   | 8.3172147   | 2 | 3  | 2 | 57.2  | 6.8   | 88  | 2 |
| AOA087X2H1 | E3 ubiquiti   | 3.2517215   | 6 | 6  | 5 | 289.5 | 5.43  | 96  | 6 |
| PODOX2     | Immunoglob    | 9.01098901  | 5 | 6  | 1 | 48.9  | 6.81  | 110 | 5 |
| AOA024R5J5 | H. sapiens    | 124.5192308 | 5 | 7  | 4 | 23.6  | 5.54  | 82  | 5 |
| Q96EK6     | Glucosamin    | 36.4130435  | 3 | 5  | 3 | 20.7  | 7.99  | 100 | 3 |
| P10909     | Clusterin     | (13.363029  | 4 | 4  | 4 | 52.5  | 6.27  | 23  | 4 |
| P14384     | Carboxypep    | 6.5462754   | 2 | 3  | 2 | 50.5  | 7.36  | 105 | 2 |
| Q96T37     | Putative R    | 18.18833163 | 6 | 7  | 6 | 107.1 | 10.08 | 68  | 6 |
| B2R5M9     | cDNA, FLJ9    | 7.29023384  | 4 | 4  | 4 | 83.5  | 7.02  | 110 | 4 |
| P62877     | E3 ubiquiti   | 30.5555556  | 3 | 4  | 3 | 12.3  | 6.96  | 109 | 3 |
| Q9Y6M5     | Zinc trans    | 11.4398422  | 3 | 4  | 3 | 55.3  | 6.48  | 32  | 3 |

|            |             |             |   |    |   |       |       |     |   |
|------------|-------------|-------------|---|----|---|-------|-------|-----|---|
| Q96HS1     | Serine/thr  | 17.6470588  | 4 | 5  | 4 | 32    | 8.68  | 66  | 4 |
| Q99805     | Transmembr  | 7.99396682  | 5 | 5  | 5 | 75.7  | 7.44  | 40  | 5 |
| Q6IAX1     | FDFT1 prote | 12.9496403  | 5 | 5  | 5 | 48.1  | 6.54  | 100 | 5 |
| Q99961     | Endophilin- | 19.2934783  | 8 | 8  | 8 | 41.5  | 5.43  | 127 | 8 |
| Q9Y512     | Sorting anc | 14.0724947  | 5 | 5  | 5 | 51.9  | 6.9   | 79  | 5 |
| E7ESZ7     | NADH dehyd  | 17.6923077  | 7 | 7  | 7 | 44.7  | 8.34  | 60  | 7 |
| P41743     | Protein kir | 11.0738255  | 4 | 5  | 4 | 68.2  | 5.85  | 40  | 4 |
| B2RDZ9     | cDNA, FLJ9  | 26.8041237  | 4 | 4  | 4 | 31.9  | 5.27  | 83  | 4 |
| Q16513     | Serine/thr  | 11.6869919  | 6 | 6  | 6 | 112   | 6.3   | 43  | 6 |
| Q14257     | Reticulocal | 18.6119874  | 3 | 3  | 3 | 36.9  | 4.4   | 69  | 3 |
| P11802     | Cyclin-depe | 15.8415842  | 4 | 7  | 3 | 33.7  | 7.01  | 115 | 4 |
| P14174     | Macrophage  | 20.8695652  | 3 | 5  | 3 | 12.5  | 7.88  | 218 | 3 |
| A8K607     | cDNA FLJ7   | 64.78380865 | 4 | 6  | 4 | 123.8 | 6.34  | 74  | 4 |
| Q06587     | E3 ubiquiti | 13.0541872  | 4 | 4  | 4 | 42.4  | 5.62  | 107 | 4 |
| Q96IR7     | 4-hydroxypl | 20.2156334  | 5 | 5  | 5 | 39.4  | 7.03  | 74  | 5 |
| O15020     | Spectrin be | 3.26359833  | 8 | 8  | 5 | 271.2 | 6.11  | 103 | 8 |
| Q99584     | Protein S1  | 45.9183673  | 3 | 4  | 3 | 11.5  | 6.16  | 55  | 3 |
| P08603     | Complement  | 7.14865963  | 7 | 7  | 7 | 139   | 6.61  | 55  | 7 |
| P61081     | NEDD8-conj  | 30.6010929  | 5 | 7  | 5 | 20.9  | 7.69  | 80  | 5 |
| BOUZZ8     | Chromosome  | 7.86885246  | 3 | 5  | 3 | 68    | 9.67  | 45  | 3 |
| Q9Y4Y9     | U6 snRNA-as | 56.043956   | 4 | 4  | 4 | 9.9   | 4.54  | 59  | 4 |
| P22532     | Small proli | 61.1111111  | 4 | 11 | 1 | 7.9   | 8.37  | 38  | 4 |
| Q8NBU5     | ATPase fami | 24.099723   | 6 | 8  | 6 | 40.7  | 6.9   | 45  | 6 |
| Q14966     | Zinc finger | 2.98281092  | 5 | 6  | 5 | 220.5 | 6.38  | 64  | 5 |
| O60566     | Mitotic che | 8.0952381   | 7 | 7  | 7 | 119.5 | 5.27  | 84  | 7 |
| C9JEJ2     | Choline-ph  | 16.8421053  | 5 | 5  | 5 | 43.2  | 8.5   | 109 | 5 |
| B2R960     | cDNA, FLJ9  | 21.799308   | 4 | 5  | 4 | 32.2  | 4.96  | 68  | 4 |
| B4DKM0     | cDNA FLJ5   | 121.3333333 | 5 | 6  | 5 | 41.6  | 9.58  | 53  | 5 |
| O60306     | Intron-binc | 5.18518519  | 6 | 6  | 6 | 171.2 | 6.37  | 61  | 6 |
| AOA024R094 | Poly(A) bir | 10.7843137  | 2 | 2  | 2 | 35    | 4.79  | 96  | 2 |
| B2R841     | Serine/thr  | 9.28689884  | 3 | 4  | 3 | 68.2  | 8.91  | 89  | 3 |
| P61024     | Cyclin-depe | 32.9113924  | 2 | 3  | 2 | 9.7   | 8.94  | 152 | 2 |
| Q9UNE7     | E3 ubiquiti | 20.4620462  | 6 | 7  | 6 | 34.8  | 5.87  | 77  | 6 |
| P62072     | Mitochondri | 38.8888889  | 3 | 4  | 3 | 10.3  | 6.29  | 89  | 3 |
| Q13526     | Peptidyl-pr | 34.3558282  | 3 | 5  | 3 | 18.2  | 8.82  | 43  | 3 |
| Q9H8S9     | MOB kinase  | 21.2962963  | 5 | 6  | 5 | 25.1  | 6.95  | 98  | 5 |
| Q9BXY0     | Protein MA  | 12.3333333  | 2 | 3  | 2 | 35.3  | 5.38  | 116 | 2 |
| B7ZC38     | Endophilin- | 17.5        | 5 | 5  | 4 | 44.3  | 5.82  | 67  | 5 |
| Q13907     | Isopentenyl | 121.1453744 | 4 | 6  | 4 | 26.3  | 6.34  | 72  | 4 |
| AOA024RBV9 | Transducin  | 10.0519931  | 4 | 6  | 2 | 62.5  | 6.55  | 91  | 4 |
| AOA024RC67 | Protein re  | 11.2903226  | 4 | 4  | 3 | 71.6  | 6.57  | 49  | 4 |
| Q32P28     | Prolyl 3-hy | 7.06521739  | 4 | 4  | 4 | 83.3  | 5.14  | 91  | 4 |
| Q6NUL6     | PITPNA prot | 17.4050633  | 4 | 5  | 3 | 35.9  | 8.05  | 95  | 4 |
| AOA024QYX0 | Emopamil bi | 12.173913   | 2 | 5  | 2 | 26.3  | 7.9   | 67  | 2 |
| B3KWW6     | cDNA FLJ4   | 35.17928287 | 6 | 6  | 6 | 145.4 | 7.61  | 125 | 6 |
| Q86U38     | Nucleolar r | 8.80503145  | 4 | 4  | 4 | 69.4  | 7.28  | 93  | 4 |
| Q9Y333     | U6 snRNA-as | 29.4736842  | 3 | 3  | 3 | 10.8  | 6.52  | 118 | 3 |
| O14965     | Aurora kin  | 14.6401985  | 4 | 4  | 4 | 45.8  | 9.39  | 61  | 4 |
| B2RB52     | cDNA, FLJ9  | 12.3042506  | 5 | 6  | 5 | 49.8  | 9.44  | 115 | 5 |
| Q6FHF7     | RABGGTA pr  | 13.7566138  | 5 | 5  | 5 | 65    | 5.74  | 43  | 5 |
| Q6IPL9     | HMGAl prote | 28.0373832  | 2 | 10 | 1 | 11.6  | 11.06 | 183 | 2 |
| AOA0A0MSG2 | Four and a  | 15.6962025  | 5 | 6  | 5 | 44.8  | 8.06  | 47  | 5 |
| O14530     | Thioredoxin | 15.9292035  | 4 | 6  | 4 | 26.5  | 5.88  | 62  | 4 |
| P51553     | Isocitrate  | 13.9949109  | 4 | 5  | 4 | 42.8  | 8.5   | 79  | 4 |
| P51398     | 28S riboso  | 14.0703518  | 3 | 3  | 3 | 45.5  | 8.88  | 81  | 3 |
| A6NHR9     | Structural  | 3.54114713  | 6 | 6  | 6 | 226.2 | 7.3   | 97  | 6 |
| Q9BWJ5     | Splicing f  | 45.3488372  | 3 | 5  | 3 | 10.1  | 6.35  | 47  | 3 |
| O95169     | NADH dehyd  | 34.9462366  | 4 | 5  | 4 | 21.8  | 6.8   | 0   | 4 |
| Q6ZVX7     | F-box only  | 11.6363636  | 3 | 5  | 3 | 30.8  | 6.62  | 100 | 3 |
| Q9H3P7     | Golgi resic | 8.33333333  | 2 | 2  | 2 | 60.6  | 5.06  | 116 | 2 |
| Q9GZR7     | ATP-depend  | 6.63562282  | 5 | 6  | 5 | 96.3  | 9.06  | 29  | 5 |
| V9HW09     | Epididymis  | 17.1428571  | 5 | 9  | 5 | 39.6  | 9.7   | 49  | 5 |
| A8K3B6     | Tyrosine-pr | 14.6666667  | 5 | 5  | 5 | 50.7  | 7.06  | 94  | 5 |
| O75179     | Ankyrin re  | 2.4587015   | 4 | 4  | 4 | 274.1 | 6.52  | 123 | 4 |
| Q7L2J0     | 7SK snRNA   | 12.3367199  | 5 | 5  | 5 | 74.3  | 9.57  | 51  | 5 |
| V9HW00     | Epididymis  | 13.3136095  | 5 | 5  | 5 | 39    | 9.57  | 93  | 5 |
| Q53EL1     | Protein KI  | 4.29553265  | 4 | 4  | 4 | 134.8 | 7.06  | 88  | 4 |
| P48507     | Glutamate-- | 15.3284672  | 3 | 4  | 3 | 30.7  | 6.02  | 135 | 3 |
| MOQXF9     | Branched-cl | 7.64044944  | 2 | 3  | 2 | 49.9  | 7.46  | 120 | 2 |
| Q13131     | 5'-AMP-acti | 8.76565295  | 3 | 3  | 3 | 64    | 8.12  | 106 | 3 |
| AOA0A6YYL2 | Sulfotransf | 120.9302326 | 4 | 6  | 2 | 34.8  | 5.83  | 51  | 4 |
| Q9H0L4     | Cleavage st | 15.19480519 | 3 | 5  | 2 | 64.4  | 7.25  | 105 | 3 |
| Q9BV57     | 1,2-dihydro | 31.8435754  | 4 | 5  | 4 | 21.5  | 5.68  | 84  | 4 |
| Q9NYK5     | 39S riboso  | 16.2721893  | 4 | 5  | 4 | 38.7  | 7.65  | 76  | 4 |
| AOA087WT44 | Heme oxyge  | 22.972973   | 4 | 4  | 4 | 41.6  | 5.44  | 61  | 4 |
| Q6LES2     | Annexin (F  | 23.0529595  | 6 | 6  | 6 | 36.1  | 6.13  | 77  | 6 |
| O14545     | TRAF-type   | 24.29553265 | 2 | 3  | 2 | 64.8  | 5.29  | 142 | 2 |

|            |                        |   |   |   |       |      |     |   |
|------------|------------------------|---|---|---|-------|------|-----|---|
| HOY368     | Dolichol-p121.6949153  | 4 | 4 | 4 | 33.3  | 9.14 | 57  | 4 |
| Q14155     | Rho guanine6.22665006  | 3 | 3 | 3 | 90    | 7.09 | 85  | 3 |
| Q15050     | Ribosome bi12.8767123  | 5 | 5 | 5 | 41.2  | 10.7 | 112 | 5 |
| Q9COC2     | 182 kDa tar 4.048583   | 5 | 5 | 5 | 181.7 | 4.86 | 51  | 5 |
| P62745     | Rho-relatec33.1632653  | 5 | 6 | 3 | 22.1  | 5.24 | 108 | 5 |
| O60925     | Prefoldin ε27.8688525  | 2 | 3 | 2 | 14.2  | 6.81 | 68  | 2 |
| B7Z4M1     | Reticulon ( 12.195122  | 1 | 2 | 1 | 12.7  | 7.83 | 146 | 1 |
| A8ASI8     | BH3 interac39.4871795  | 4 | 4 | 4 | 22    | 5.44 | 63  | 4 |
| AOA024RDV7 | Importin st14.0115163  | 5 | 5 | 3 | 57.8  | 4.94 | 66  | 5 |
| P28065     | Proteasome 28.7671233  | 6 | 6 | 6 | 23.3  | 5.03 | 112 | 6 |
| Q9H845     | Acyl-CoA de9.98389694  | 3 | 4 | 3 | 68.7  | 7.96 | 42  | 3 |
| Q0VDF9     | Heat shock 11.1984283  | 2 | 3 | 2 | 54.8  | 5.59 | 70  | 2 |
| Q86TU7     | Histone-lys10.1010101  | 5 | 5 | 4 | 67.2  | 5.96 | 98  | 5 |
| Q9NQ88     | Fructose-2,24.8148148  | 3 | 3 | 3 | 30    | 7.69 | 85  | 3 |
| Q02978     | Mitochondri16.5605096  | 4 | 4 | 4 | 34    | 9.91 | 106 | 4 |
| Q5ST80     | FLOT1 prote13.1147541  | 4 | 4 | 4 | 47.3  | 7.49 | 49  | 4 |
| AOA087WZE9 | High mobilil1.5384615  | 1 | 4 | 1 | 13.9  | 9.91 | 47  | 1 |
| Q9UNN5     | FAS-associε8.30769231  | 3 | 3 | 3 | 73.9  | 4.88 | 70  | 3 |
| P13674     | Prolyl 4-hy8.80149813  | 3 | 4 | 3 | 61    | 6.01 | 67  | 3 |
| Q92797     | Symplekin (3.76766091  | 3 | 4 | 3 | 141.1 | 6.13 | 78  | 3 |
| Q15427     | Splicing fa13.9150943  | 5 | 5 | 5 | 44.4  | 8.56 | 80  | 5 |
| Q13951     | Core-bindir26.9230769  | 3 | 3 | 3 | 21.5  | 6.6  | 68  | 3 |
| P53597     | Succinate- 13.583815   | 4 | 6 | 4 | 36.2  | 8.79 | 84  | 4 |
| Q96JB5     | CDK5 regulε10.2766798  | 5 | 5 | 4 | 56.9  | 4.75 | 61  | 5 |
| Q00765     | Receptor ε16.9312169   | 4 | 5 | 4 | 21.5  | 8.1  | 119 | 4 |
| H3BND4     | Pyridoxal-ε8.18858561  | 4 | 4 | 4 | 88.7  | 5.48 | 106 | 4 |
| Q5VW32     | BR01 domair11.4355231  | 3 | 3 | 3 | 46.4  | 7.65 | 57  | 3 |
| Q9UNL2     | Translocon-15.6756757  | 3 | 4 | 3 | 21.1  | 9.61 | 109 | 3 |
| O75663     | TIP41-like 25.3676471  | 6 | 6 | 6 | 31.4  | 5.91 | 70  | 6 |
| B2R5S3     | cDNA, FLJ9ε 18.380744  | 5 | 6 | 5 | 50.2  | 8.31 | 50  | 5 |
| B0LPF3     | Growth fact24.8847926  | 5 | 6 | 5 | 25.2  | 6.32 | 102 | 5 |
| Q96N66     | Lysophosphc8.89830508  | 4 | 5 | 4 | 52.7  | 8.97 | 159 | 4 |
| Q9NW64     | Pre-mRNA-si 15         | 5 | 5 | 5 | 46.9  | 8.54 | 66  | 5 |
| Q9HAV7     | GrpE protei18.4331797  | 3 | 4 | 3 | 24.3  | 8.12 | 75  | 3 |
| I3L3T0     | HCG15164, i23.4482759  | 2 | 2 | 2 | 15.9  | 9.92 | 132 | 2 |
| E7EQZ4     | Survival mc23.8095238  | 4 | 4 | 4 | 31.7  | 5.71 | 53  | 4 |
| AOA087WU03 | Heterogenec40.3508772  | 2 | 2 | 2 | 6.7   | 4.65 | 83  | 2 |
| P63096     | Guanine nucl4.4067797  | 4 | 5 | 1 | 40.3  | 5.97 | 73  | 4 |
| B4DT57     | cDNA FLJ61ε10.6666667  | 4 | 5 | 1 | 50    | 5.6  | 86  | 4 |
| A4D198     | Similar to 14.2857143  | 4 | 6 | 1 | 32.6  | 8.87 | 73  | 4 |
| Q9H7B2     | Ribosome pi18.3006536  | 5 | 5 | 5 | 35.6  | 9.99 | 108 | 5 |
| Q6FGU2     | DTYMK protec25.4716981 | 5 | 6 | 5 | 23.8  | 8.27 | 58  | 5 |
| Q96EY7     | Pentatricoε7.54716981  | 4 | 4 | 4 | 78.5  | 6.42 | 78  | 4 |
| AOA0B4J1V9 | Helicase, 15.54298643  | 4 | 6 | 4 | 102.7 | 7.65 | 89  | 4 |
| E5RJR5     | S-phase kir40.4907975  | 4 | 6 | 4 | 18.7  | 4.7  | 0   | 4 |
| Q9BRK5     | 45 kDa calc9.39226519  | 3 | 4 | 3 | 41.8  | 4.86 | 92  | 3 |
| J3KR97     | Tubulin-spε4.14634146  | 4 | 4 | 4 | 136.5 | 6.34 | 88  | 4 |
| P11216     | Glycogen pl 5.9311981  | 5 | 6 | 1 | 96.6  | 6.86 | 68  | 5 |
| Q7Z460     | CLIP-associ2.86085826  | 3 | 4 | 1 | 169.3 | 9.03 | 45  | 3 |
| P50238     | Cysteine-ri59.7402597  | 3 | 5 | 3 | 8.5   | 8.75 | 53  | 3 |
| E9PQY2     | Prefoldin ε24.2647059  | 3 | 3 | 3 | 15.6  | 4.58 | 96  | 3 |
| AOA024QZG0 | Ring finger7.09290709  | 5 | 5 | 3 | 113.6 | 6.29 | 50  | 5 |
| Q13363     | C-terminal-11.5909091  | 6 | 6 | 1 | 47.5  | 6.77 | 79  | 6 |
| Q5R3I4     | Tetratricoε14.9253731  | 6 | 6 | 6 | 52.8  | 5.99 | 60  | 6 |
| P10586     | Receptor-ty3.14630309  | 5 | 5 | 5 | 212.7 | 6.3  | 69  | 5 |
| Q92896     | Golgi appar6.27650551  | 5 | 5 | 5 | 134.5 | 6.9  | 102 | 5 |
| P30622     | CAP-Gly don5.56328234  | 5 | 5 | 5 | 162.1 | 5.36 | 54  | 5 |
| Q6PGP7     | Tetratricoε3.96419437  | 5 | 5 | 5 | 175.4 | 7.53 | 63  | 5 |
| O75844     | CAAX prenyl13.0526316  | 5 | 7 | 5 | 54.8  | 7.49 | 57  | 5 |
| O94874     | E3 UFM1-prc6.92695214  | 4 | 4 | 4 | 89.5  | 6.79 | 47  | 4 |
| G3V1L9     | Tight junct3.84615385  | 5 | 6 | 5 | 197.3 | 6.67 | 69  | 5 |
| Q9Y3C8     | Ubiquitin-120.9580838  | 3 | 5 | 3 | 19.4  | 7.4  | 45  | 3 |
| Q53G26     | DnaJ (Hsp4c 6.25       | 2 | 5 | 2 | 52.5  | 9.26 | 45  | 2 |
| Q5TB52     | 3'-phosphoε8.79478827  | 4 | 4 | 4 | 69.5  | 8.03 | 44  | 4 |
| E5KLJ5     | Dynamini-li15.32019704 | 5 | 6 | 5 | 117.7 | 7.77 | 54  | 5 |
| Q9NVX2     | Notchless p15.4639175  | 4 | 4 | 4 | 53.3  | 7.34 | 61  | 4 |
| Q9BUR4     | Telomerase 6.02189781  | 2 | 3 | 2 | 59.3  | 4.58 | 96  | 2 |
| Q59GY0     | Apolipoprot18.3962264  | 3 | 4 | 3 | 25.2  | 8.57 | 71  | 3 |
| O60493     | Sorting neε28.3950617  | 4 | 7 | 3 | 18.8  | 8.66 | 110 | 4 |
| Q5VTR2     | E3 ubiquiti6.25641026  | 5 | 5 | 4 | 113.6 | 5.94 | 81  | 5 |
| Q6PJT7     | Zinc finger10.1902174  | 6 | 6 | 6 | 82.8  | 7.31 | 104 | 6 |
| Q14692     | Ribosome bi5.77223089  | 6 | 6 | 6 | 145.7 | 6.44 | 51  | 6 |
| O43252     | Bifunctionε12.0192308  | 4 | 4 | 4 | 70.8  | 6.86 | 0   | 4 |
| Q9BSC4     | Nucleolar p 10.755814  | 4 | 4 | 4 | 80.3  | 8.46 | 41  | 4 |
| Q9NQG5     | Regulation 17.1779141  | 4 | 4 | 3 | 36.9  | 5.97 | 90  | 4 |
| P57081     | tRNA (guani8.25242718  | 2 | 3 | 2 | 45.5  | 7.11 | 44  | 2 |
| Q96K17     | Transcripti45.5696203  | 3 | 4 | 3 | 17.3  | 6.35 | 56  | 3 |

|            |                        |   |    |   |       |       |     |   |
|------------|------------------------|---|----|---|-------|-------|-----|---|
| Q6FI81     | Anamorsin (25.3205128  | 4 | 5  | 4 | 33.6  | 5.62  | 59  | 4 |
| B4DJ38     | cDNA FLJ5604.93991989  | 3 | 3  | 1 | 84.1  | 8.57  | 125 | 3 |
| Q9BVJ8     | HEXA protei12.2249389  | 3 | 3  | 3 | 47.1  | 5     | 88  | 3 |
| P10155     | 60 kDa SS-17.43494424  | 3 | 3  | 3 | 60.6  | 8.03  | 108 | 3 |
| A8K3Z5     | Nucleoporin14.4171779  | 3 | 3  | 3 | 34.8  | 9.36  | 131 | 3 |
| G3V3G9     | Uncharacteri5.1930759  | 3 | 3  | 1 | 84.7  | 5.12  | 122 | 3 |
| P00450     | Ceruloplasmi8.82629108 | 6 | 6  | 6 | 122.1 | 5.72  | 42  | 6 |
| A8KAE0     | cDNA FLJ785.04871568   | 4 | 4  | 4 | 125.9 | 5.62  | 137 | 4 |
| O43159     | Ribosomal F12.2807018  | 4 | 4  | 4 | 50.7  | 9.42  | 92  | 4 |
| G3V4P8     | Glia mature34          | 3 | 3  | 3 | 17.5  | 5.31  | 58  | 3 |
| P61020     | Ras-related19.0697674  | 4 | 5  | 1 | 23.7  | 8.13  | 139 | 4 |
| Q9Y2W2     | WW domain-18.42433697  | 4 | 4  | 4 | 70    | 8.38  | 86  | 4 |
| F8W1S1     | Keratin, ty6.07734807  | 5 | 11 | 1 | 59.4  | 7.44  | 219 | 5 |
| O95801     | Tetratricolo19.379845  | 4 | 4  | 4 | 44.7  | 5.6   | 52  | 4 |
| AOA087XOW7 | Acyl-coenzyl1.8764846  | 3 | 4  | 3 | 46.3  | 7.02  | 55  | 3 |
| R9S3C3     | p14ARF/p16128.2352941  | 3 | 3  | 1 | 18.5  | 11.68 | 111 | 3 |
| P10515     | Dihydrolipic8.19165379 | 4 | 4  | 4 | 69    | 7.84  | 90  | 4 |
| B3KM21     | Family with22.8813559  | 3 | 4  | 3 | 13.3  | 8.76  | 148 | 3 |
| B5BU32     | Thymidine l20.5128205  | 3 | 6  | 3 | 25.4  | 8.63  | 0   | 3 |
| Q8IZ83     | Aldehyde de5.11221945  | 3 | 3  | 3 | 85.1  | 6.79  | 143 | 3 |
| Q8WWQ0     | PH-interact3.3498078   | 4 | 4  | 4 | 206.6 | 8.85  | 57  | 4 |
| Q9NTM9     | Copper home15.018315   | 3 | 3  | 3 | 29.3  | 8.18  | 80  | 3 |
| B2R713     | cDNA, FLJ93.95634379   | 2 | 3  | 2 | 81.7  | 7.97  | 134 | 2 |
| Q9HCE1     | Putative he7.17846461  | 5 | 5  | 5 | 113.6 | 8.82  | 65  | 5 |
| E9PR30     | 40S ribosom12.244898   | 3 | 7  | 3 | 10.9  | 11.56 | 140 | 3 |
| Q9H4A6     | Golgi phosph14.4295302 | 3 | 3  | 3 | 33.8  | 6.44  | 94  | 3 |
| P28288     | ATP-binding8.49772382  | 4 | 4  | 3 | 75.4  | 9.36  | 75  | 4 |
| Q15907     | Ras-related24.7706422  | 5 | 7  | 5 | 24.5  | 5.94  | 112 | 5 |
| Q8N4Q1     | Mitochondri20.4225352  | 2 | 3  | 2 | 16    | 4.31  | 36  | 2 |
| Q9GZU8     | Protein FAM16.5354331  | 4 | 4  | 4 | 28.9  | 5.45  | 106 | 4 |
| G8JLH6     | Tetraspanin15.3508772  | 2 | 3  | 2 | 25.4  | 6.52  | 156 | 2 |
| B7ZLW0     | LPP proteini1.4379085  | 4 | 4  | 4 | 65.7  | 7.37  | 35  | 4 |
| AOA024R7S3 | Clathrin li9.95260664  | 1 | 2  | 1 | 23.2  | 4.69  | 39  | 1 |
| Q9Y3C1     | Nucleolar r36.5168539  | 6 | 6  | 6 | 21.2  | 9.94  | 40  | 6 |
| AOA023T787 | RNA-binding22.4137931  | 4 | 5  | 4 | 19.9  | 5.72  | 54  | 4 |
| AOA0AOMTNO | Cullin-2 O58.31134565  | 6 | 6  | 5 | 88.4  | 6.93  | 49  | 6 |
| A1L3A7     | Nuclear fra9.78417266  | 5 | 6  | 5 | 76.1  | 8.7   | 67  | 5 |
| C9IZQ1     | Translocon-7.71812081  | 2 | 4  | 2 | 33.9  | 4.69  | 127 | 2 |
| Q96BR5     | Cytochrome18.6147186   | 2 | 3  | 2 | 25.7  | 6.02  | 54  | 2 |
| P78318     | Immunoglobul15.6342183 | 3 | 3  | 3 | 39.2  | 5.38  | 82  | 3 |
| Q99471     | Prefoldin e36.3636364  | 5 | 6  | 5 | 17.3  | 6.33  | 39  | 5 |
| P30047     | GTP cyclohy40.4761905  | 2 | 3  | 2 | 9.7   | 6.54  | 94  | 2 |
| Q53F62     | ADP-ribosyl15.7635468  | 3 | 3  | 3 | 44.6  | 5.44  | 53  | 3 |
| L7RXH5     | Mitogen-act18.97097625 | 2 | 3  | 2 | 43.1  | 6.74  | 68  | 2 |
| AOA024QZC1 | CD2 antigen22.8739003  | 4 | 4  | 4 | 37.6  | 4.61  | 81  | 4 |
| AOA024QZY5 | PRP4 pre-mf3.77358491  | 3 | 3  | 3 | 116.9 | 10.26 | 74  | 3 |
| MOQWZ7     | Serine--tR10.03861     | 4 | 4  | 4 | 58.1  | 8.28  | 75  | 4 |
| Q9Y4E8     | Ubiquitin c5.70846075  | 4 | 6  | 3 | 112.3 | 5.22  | 78  | 4 |
| P15529     | Membrane cc6.37755102  | 2 | 4  | 2 | 43.7  | 6.74  | 72  | 2 |
| O75348     | V-type prot21.1864407  | 2 | 3  | 2 | 13.7  | 8.79  | 106 | 2 |
| E7EQ64     | Trypsin-1 (11.4942529  | 2 | 3  | 2 | 28.1  | 7.25  | 58  | 2 |
| B2RB47     | AMP deamin6.48464164   | 5 | 6  | 5 | 100.7 | 6.93  | 77  | 5 |
| F1JVV5     | EWSR1/ATF19.4972067    | 4 | 4  | 3 | 57    | 8.57  | 93  | 4 |
| B4DU42     | cDNA FLJ5619.19003115  | 4 | 4  | 4 | 71.8  | 7.3   | 44  | 4 |
| Q8NB16     | Mixed line16.3481953   | 6 | 7  | 5 | 54.4  | 8.82  | 43  | 6 |
| Q961X5     | Up-regulat27.5862069   | 2 | 3  | 2 | 6.5   | 9.76  | 110 | 2 |
| AOA024RD36 | Ribosomal r16.0784314  | 3 | 3  | 3 | 29.7  | 10.52 | 101 | 3 |
| O95202     | LETM1 and F7.84844384  | 5 | 5  | 5 | 83.3  | 6.7   | 78  | 5 |
| Q13724     | Mannosyl-ol7.28793309  | 4 | 4  | 4 | 91.9  | 8.9   | 39  | 4 |
| B5MBZ0     | Echinoderm8.06451613   | 5 | 5  | 5 | 110.1 | 6.49  | 35  | 5 |
| Q5M775     | Cytospin-B7.58426966   | 5 | 7  | 5 | 118.5 | 6.7   | 33  | 5 |
| Q9BRR6     | ADP-depend13.2796781   | 3 | 3  | 3 | 54.1  | 6.2   | 42  | 3 |
| PODOX6     | Immunoglobul8.15972222 | 3 | 3  | 3 | 63.4  | 7.87  | 92  | 3 |
| AOA024RAD5 | Dolichyl-dj12.0614035  | 6 | 6  | 6 | 50.7  | 6.4   | 75  | 6 |
| Q9UHI6     | Probable A18.13106796  | 5 | 5  | 5 | 92.2  | 6.95  | 54  | 5 |
| AOA0AOMT11 | Calcium/cal13.0824373  | 5 | 5  | 5 | 62.6  | 7.83  | 27  | 5 |
| Q9H2W6     | 39S ribosom18.6379928  | 4 | 4  | 4 | 31.7  | 7.05  | 49  | 4 |
| Q9Y3B2     | Exosome con21.025641   | 3 | 4  | 3 | 21.4  | 8.24  | 66  | 3 |
| B4DEF8     | cDNA FLJ61120.668693   | 5 | 5  | 5 | 37.8  | 9.13  | 27  | 5 |
| A8K7Z3     | cDNA FLJ775.46967895   | 3 | 3  | 3 | 95.9  | 5.07  | 93  | 3 |
| Q12996     | Cleavage st6.13668061  | 3 | 3  | 3 | 82.9  | 8.12  | 110 | 3 |
| Q86UK7     | E3 ubiquiti5.30973451  | 4 | 4  | 4 | 98.6  | 8.4   | 106 | 4 |
| Q9NRG0     | Chromatin e31.2977099  | 3 | 3  | 3 | 14.7  | 5.1   | 93  | 3 |
| HOY8X4     | 2'-deoxynuc23.8683128  | 5 | 6  | 5 | 25.9  | 5.5   | 83  | 5 |
| Q8N335     | Glycerol-3-14.5299145  | 4 | 4  | 4 | 38.4  | 7.02  | 80  | 4 |
| Q9BSH4     | Translatior16.8350168  | 3 | 4  | 3 | 32.5  | 8.13  | 39  | 3 |
| B5BU81     | YKT6 v-SNAF22.7272727  | 3 | 4  | 3 | 22.4  | 6.92  | 36  | 3 |

|            |                        |   |   |   |       |       |     |   |
|------------|------------------------|---|---|---|-------|-------|-----|---|
| Q9BS40     | Latexin OS=8.10810811  | 1 | 2 | 1 | 25.7  | 5.78  | 124 | 1 |
| Q86YZ3     | Hornerin OS=4.49122807 | 2 | 3 | 2 | 282.2 | 10.04 | 85  | 2 |
| P48634     | Protein PRF4.45062587  | 5 | 6 | 5 | 228.7 | 9.45  | 34  | 5 |
| P78346     | Ribonucleas17.9104478  | 3 | 4 | 3 | 29.3  | 8.91  | 51  | 3 |
| J3QK89     | Calcium hor8.95361381  | 4 | 5 | 4 | 104.9 | 9.19  | 0   | 4 |
| Q13404     | Ubiquitin-c27.2108844  | 4 | 4 | 1 | 16.5  | 7.93  | 119 | 4 |
| Q9NX40     | OCIA domain28.9795918  | 5 | 6 | 5 | 27.6  | 7.49  | 62  | 5 |
| V9HWK4     | Epididymis 5.35714286  | 4 | 5 | 1 | 73.6  | 8.72  | 96  | 4 |
| B2R4D5     | Actin-relat28.6516854  | 4 | 5 | 4 | 20.5  | 8.59  | 91  | 4 |
| Q7Z4W1     | L-xylulose 13.9344262  | 3 | 4 | 3 | 25.9  | 8.1   | 80  | 3 |
| Q9NPE3     | H/ACA ribos 53.125     | 2 | 4 | 2 | 7.7   | 9.99  | 65  | 2 |
| P80217     | Interferon-5.94405594  | 1 | 2 | 1 | 31.5  | 6.09  | 92  | 1 |
| B4E1J8     | cDNA FLJ56223.1092437  | 3 | 5 | 3 | 27.2  | 9.66  | 61  | 3 |
| Q8N9T8     | Protein KR15.54765292  | 2 | 2 | 2 | 82.5  | 5.14  | 59  | 2 |
| Q8NEJ9     | Neuroguidin12.3809524  | 3 | 6 | 3 | 35.9  | 9.57  | 61  | 3 |
| Q15042     | Rab3 GTPase4.99490316  | 4 | 5 | 4 | 110.5 | 5.55  | 25  | 4 |
| AOA1POAYU5 | Sideroflexin12.6153846 | 3 | 3 | 1 | 36    | 9.09  | 123 | 3 |
| Q9NZZ3     | Charged mul26.4840183  | 3 | 4 | 3 | 24.6  | 4.83  | 86  | 3 |
| O95274     | Ly6/PLAUR c10.6936416  | 3 | 4 | 2 | 35.9  | 7.75  | 90  | 3 |
| Q53FR9     | COMM domain8.08080808  | 1 | 2 | 1 | 21.8  | 5.88  | 77  | 1 |
| C9J7E5     | Transportin5.01567398  | 5 | 5 | 5 | 108   | 5.71  | 59  | 5 |
| Q96HY6     | DDRKG domain15.2866242 | 2 | 2 | 2 | 35.6  | 5.12  | 84  | 2 |
| Q8NFC6     | Biorientati1.60603081  | 3 | 3 | 3 | 330.3 | 5.08  | 53  | 3 |
| Q9Y4W2     | Ribosomal l9.26430518  | 4 | 4 | 4 | 83    | 4.73  | 15  | 4 |
| Q8NDC0     | MAPK-interc6.93877551  | 1 | 2 | 1 | 24.3  | 5.62  | 75  | 1 |
| F8W6G1     | Nuclear rec10.1289134  | 3 | 3 | 3 | 60.8  | 5.16  | 57  | 3 |
| Q9HCS7     | Pre-mRNA-sf4.56140351  | 3 | 3 | 3 | 99.9  | 6.23  | 90  | 3 |
| J3QRU1     | Tyrosine-pi8.75912409  | 4 | 7 | 3 | 61.3  | 6.57  | 71  | 4 |
| A8KA19     | cDNA FLJ7584.67775468  | 3 | 3 | 3 | 109.8 | 5.39  | 83  | 3 |
| O14548     | Cytochrome 49.122807   | 3 | 4 | 3 | 12.6  | 9.42  | 90  | 3 |
| P28799     | Granulins (4.89038786  | 2 | 2 | 2 | 63.5  | 6.83  | 113 | 2 |
| Q7Z4V5     | Hepatoma-de4.91803279  | 4 | 7 | 2 | 74.3  | 7.49  | 48  | 4 |
| O75964     | ATP synthas33.9805825  | 3 | 3 | 3 | 11.4  | 9.64  | 111 | 3 |
| Q13564     | NEDD8-activ8.98876404  | 4 | 4 | 4 | 60.2  | 5.4   | 93  | 4 |
| Q14574     | Desmocollin5.80357143  | 4 | 5 | 4 | 99.9  | 6.1   | 52  | 4 |
| Q49A26     | Putative os8.49909584  | 3 | 3 | 3 | 60.5  | 9.17  | 37  | 3 |
| AOA0J9YXF2 | Paraoxonase 11.2       | 3 | 3 | 3 | 41.5  | 5.72  | 57  | 3 |
| AOA0AOMTJ9 | Neutral chc12.2767857  | 4 | 4 | 4 | 49.9  | 7.21  | 98  | 4 |
| Q14061     | Cytochrome 84.1269841  | 3 | 3 | 3 | 6.9   | 7.24  | 54  | 3 |
| P56134     | ATP synthas42.5531915  | 3 | 3 | 1 | 10.9  | 9.67  | 88  | 3 |
| Q16718     | NADH dehyd30.1724138   | 3 | 3 | 3 | 13.5  | 5.99  | 72  | 3 |
| Q9NXH9     | tRNA (guani7.58725341  | 4 | 4 | 4 | 72.2  | 7.64  | 58  | 4 |
| B5BUI8     | Dual specifi7.02702703 | 1 | 2 | 1 | 20.6  | 8.15  | 91  | 1 |
| P11279     | Lysosome-as6.23501199  | 2 | 4 | 2 | 44.9  | 8.75  | 47  | 2 |
| Q13330     | Metastasis-6.57342657  | 3 | 3 | 2 | 80.7  | 9.26  | 52  | 3 |
| Q15833     | Syntaxin-bi9.78077572  | 4 | 4 | 4 | 66.4  | 6.55  | 44  | 4 |
| Q9H7D7     | WD repeat-c7.26172466  | 4 | 5 | 4 | 72.1  | 6.16  | 41  | 4 |
| B7ZKQ8     | PODXL prote12.6785714  | 5 | 7 | 5 | 58.8  | 5.49  | 74  | 5 |
| Q9HD45     | Transmembr8.31918506   | 3 | 3 | 3 | 67.8  | 7.21  | 60  | 3 |
| O43290     | U4/U6.U5 t1 8.375      | 5 | 5 | 5 | 90.2  | 6.13  | 72  | 5 |
| A4LAA3     | Alpha thal2.16693419   | 4 | 4 | 4 | 282.4 | 6.55  | 32  | 4 |
| MOQZR4     | Rho guanine3.71900826  | 3 | 3 | 3 | 108.3 | 6.15  | 69  | 3 |
| P82912     | 28S ribosom23.7113402  | 2 | 3 | 2 | 20.6  | 10.81 | 96  | 2 |
| I1VE18     | SEC22 vesic37.7358491  | 1 | 3 | 1 | 6.1   | 4.94  | 51  | 1 |
| B2R8N1     | cDNA, FLJ92.0095694    | 3 | 3 | 3 | 23.2  | 5.38  | 67  | 3 |
| Q96T51     | RUN and FY19.60451977  | 5 | 6 | 5 | 79.8  | 5.74  | 79  | 5 |
| Q6UN15     | Pre-mRNA 3'7.74410774  | 3 | 3 | 3 | 66.5  | 5.59  | 78  | 3 |
| Q15392     | Delta(24)-c4.26356589  | 3 | 4 | 3 | 60.1  | 8.16  | 92  | 3 |
| Q8N4V1     | Membrane mc26.7175573  | 2 | 2 | 2 | 14.7  | 9.16  | 73  | 2 |
| O95983     | Methyl-CpG-19.9312715  | 4 | 4 | 3 | 32.8  | 5.34  | 58  | 4 |
| Q8NHH9     | Atlastin-2 10.806175   | 4 | 4 | 4 | 66.2  | 5.48  | 63  | 4 |
| P09496     | Clathrin li20.9677419  | 6 | 8 | 6 | 27.1  | 4.51  | 104 | 6 |
| P35251     | Replicatio3.57142857   | 3 | 3 | 3 | 128.2 | 9.36  | 116 | 3 |
| B2RDN3     | Cytosolic F19.1881919  | 2 | 2 | 2 | 28.9  | 5.83  | 0   | 2 |
| Q6L8Q7     | 2',5'-phos7.22495895   | 3 | 3 | 3 | 67.3  | 6.57  | 43  | 3 |
| O15121     | Sphingolipi11.1455108  | 2 | 3 | 2 | 37.8  | 7.46  | 41  | 2 |
| P23229     | Integrin al4.07079646  | 4 | 4 | 4 | 126.5 | 6.61  | 23  | 4 |
| Q8TBB5     | Kelch domain11.7307692 | 5 | 5 | 5 | 57.9  | 5.72  | 44  | 5 |
| P21912     | Succinate c21.4285714  | 6 | 6 | 6 | 31.6  | 8.76  | 77  | 6 |
| O95235     | Kinesin-li3.25842697   | 2 | 2 | 2 | 100.2 | 6.92  | 136 | 2 |
| E5RIM7     | Copper trar43.8356164  | 2 | 3 | 2 | 7.9   | 7.24  | 20  | 2 |
| Q9BV40     | Vesicle-ass 37         | 3 | 4 | 3 | 11.4  | 7.34  | 84  | 3 |
| Q9H832     | Ubiquitin-c7.90960452  | 3 | 3 | 3 | 38.2  | 5.62  | 56  | 3 |
| AOA024R136 | Rac GTPase 6.17088608  | 3 | 3 | 3 | 71    | 8.88  | 82  | 3 |
| AOA0C4DFL7 | Lanosterol 11.7878193  | 4 | 4 | 4 | 57.2  | 8.53  | 33  | 4 |
| AOA087WSV8 | Nucleobindi 10         | 3 | 3 | 2 | 50.2  | 5.12  | 72  | 3 |
| Q9BRT6     | Protein LLI12.4031008  | 1 | 2 | 1 | 15.2  | 10.37 | 74  | 1 |



|            |                       |   |   |   |       |       |     |   |
|------------|-----------------------|---|---|---|-------|-------|-----|---|
| P41223     | Protein BUI34.0277778 | 4 | 4 | 4 | 17    | 8.82  | 65  | 4 |
| O75794     | Cell divisi 12.797619 | 5 | 5 | 5 | 39.1  | 4.81  | 109 | 5 |
| AOA0AOMS29 | Mitochondri32.5791855 | 3 | 3 | 3 | 25.3  | 8.76  | 0   | 3 |
| X6RLX0     | ELKS/Rab6-i4.01785714 | 3 | 3 | 3 | 128.4 | 5.97  | 58  | 3 |
| Q9UJZ1     | Stomatin-li7.02247191 | 2 | 3 | 2 | 38.5  | 7.39  | 48  | 2 |
| Q9BZX2     | Uridine-cyt 22.605364 | 3 | 6 | 3 | 29.3  | 6.7   | 85  | 3 |
| AOA087WZM5 | Peptidylprc1.7829457  | 3 | 4 | 3 | 14.9  | 9.52  | 82  | 3 |
| A4DOW0     | LSM8 homolc27.0833333 | 2 | 3 | 2 | 10.4  | 4.48  | 100 | 2 |
| A8K4G7     | cDNA FLJ7810.3603604  | 4 | 5 | 4 | 49.2  | 6.76  | 74  | 4 |
| AOA024R563 | Protein phc 32.160804 | 3 | 4 | 3 | 21    | 5.22  | 30  | 3 |
| B8K1J4     | Signal prot15.4150198 | 3 | 3 | 3 | 27.5  | 8.57  | 91  | 3 |
| Q59H39     | Signal tra7.23350254  | 4 | 4 | 4 | 89.9  | 6.2   | 81  | 4 |
| Q9BTY7     | Protein HGI4.6153846  | 4 | 4 | 4 | 42.1  | 4.81  | 75  | 4 |
| P23434     | Glycine clc17.3410405 | 2 | 2 | 2 | 18.9  | 4.88  | 107 | 2 |
| Q9BVI4     | Nucleolar c9.49612403 | 3 | 3 | 3 | 58.4  | 7.49  | 100 | 3 |
| Q9Y446     | Plakophilin6.14805521 | 4 | 4 | 4 | 87    | 9.32  | 81  | 4 |
| P41208     | Centrin-2 (21.5116279 | 3 | 4 | 3 | 19.7  | 5     | 80  | 3 |
| AOA1BOGTU4 | Paxillin O53.79278446 | 3 | 4 | 3 | 115.8 | 5.64  | 30  | 3 |
| B7Z268     | Single-strc24.5283019 | 3 | 3 | 3 | 18.5  | 10.1  | 75  | 3 |
| P22830     | Ferrocyclat11.1111111 | 4 | 4 | 4 | 47.8  | 8.73  | 36  | 4 |
| Q6IN85     | Serine/thrc5.40216086 | 4 | 4 | 3 | 95.3  | 4.94  | 51  | 4 |
| B2R5U3     | EH-domain c13.4831461 | 4 | 4 | 4 | 60.6  | 6.83  | 40  | 4 |
| G5E975     | SWI/SNF rel6.09137056 | 2 | 3 | 2 | 45    | 5.76  | 55  | 2 |
| Q6UWP7     | Lysocardiol5.07246377 | 2 | 3 | 2 | 48.9  | 8.62  | 51  | 2 |
| P27144     | Adenylate h11.6591928 | 2 | 3 | 2 | 25.3  | 8.4   | 63  | 2 |
| Q9Y2Z4     | Tyrosine-t10.0628931  | 4 | 4 | 4 | 53.2  | 8.98  | 65  | 4 |
| A8MU27     | Small ubiq121.7687075 | 4 | 6 | 3 | 16.9  | 9.67  | 111 | 4 |
| Q99595     | Mitochondri26.3157895 | 2 | 2 | 2 | 18    | 7.87  | 102 | 2 |
| Q96C86     | m7GpppX di19.79228487 | 2 | 2 | 2 | 38.6  | 6.38  | 99  | 2 |
| Q03701     | CCAAT/enhar5.88235294 | 4 | 4 | 4 | 120.9 | 5.94  | 81  | 4 |
| Q9UI09     | NADH dehyd129.6551724 | 3 | 3 | 3 | 17.1  | 9.63  | 80  | 3 |
| Q9Y6K9     | NF-kappa-B 7.6372315  | 2 | 4 | 2 | 48.2  | 5.71  | 33  | 2 |
| Q92905     | COP9 signal10.7784431 | 3 | 4 | 3 | 37.6  | 6.54  | 39  | 3 |
| Q8WUM5     | Gem (Nuclec3.78071834 | 3 | 3 | 3 | 120   | 6.09  | 57  | 3 |
| Q96A26     | Protein FAM27.2727273 | 3 | 5 | 3 | 17.3  | 9.77  | 36  | 3 |
| P56556     | NADH dehyd124.025974  | 3 | 4 | 3 | 17.9  | 10.14 | 35  | 3 |
| Q9HOC8     | Integrin-li11.9897959 | 4 | 4 | 4 | 42.9  | 7.09  | 63  | 4 |
| P49959     | Double-strc8.47457627 | 4 | 4 | 4 | 80.5  | 5.9   | 78  | 4 |
| Q13572     | Inositol-tc10.3864734 | 2 | 2 | 2 | 45.6  | 6.16  | 56  | 2 |
| Q13084     | 39S ribosom 22.265625 | 3 | 3 | 3 | 30.1  | 8.29  | 0   | 3 |
| Q15102     | Platelet-ac16.4502165 | 3 | 4 | 3 | 25.7  | 6.84  | 90  | 3 |
| AOAOS2Z5HO | Mitochondri 21.875    | 4 | 4 | 4 | 21.4  | 9.1   | 120 | 4 |
| Q53F37     | SAR1a gene 25.2525253 | 4 | 4 | 2 | 22.4  | 6.11  | 36  | 4 |
| O15357     | Phosphatidy3.89507154 | 3 | 3 | 3 | 138.5 | 6.54  | 45  | 3 |
| AOA087WZNI | Isocitrate 13.1782946 | 5 | 5 | 5 | 42.4  | 8.46  | 98  | 5 |
| Q9NPD3     | Exosome con10.6122449 | 2 | 3 | 2 | 26.4  | 6.52  | 42  | 2 |
| Q9BY43     | Charged mul15.7657658 | 3 | 3 | 3 | 25.1  | 4.7   | 115 | 3 |
| Q15642     | Cdc42-inter8.65224626 | 3 | 3 | 3 | 68.3  | 5.73  | 50  | 3 |
| Q5T1Z8     | Pumilio hor3.43137255 | 4 | 4 | 4 | 130   | 6.9   | 88  | 4 |
| E7EMK3     | Flotillin-27.86749482 | 2 | 2 | 2 | 53.1  | 5.24  | 0   | 2 |
| P57076     | UPF0769 prc13.7931034 | 3 | 3 | 3 | 33.2  | 7.44  | 56  | 3 |
| Q15075     | Early endoc4.25230333 | 4 | 8 | 4 | 162.4 | 5.68  | 64  | 4 |
| Q9UBU8     | Mortality f 11.878453 | 4 | 4 | 4 | 41.4  | 9.28  | 31  | 4 |
| Q96TC7     | Regulator c9.78723404 | 3 | 3 | 3 | 52.1  | 5.1   | 47  | 3 |
| Q969S3     | Zinc finger7.33752621 | 2 | 2 | 2 | 54.2  | 6.15  | 86  | 2 |
| AOA0B4J2B5 | Immunoglob19.3877551  | 1 | 2 | 1 | 10.7  | 8.46  | 76  | 1 |
| Q07960     | Rho GTPase-15.4897449 | 4 | 4 | 4 | 50.4  | 6.29  | 53  | 4 |
| Q9HD20     | Manganese-t3.90365449 | 2 | 3 | 2 | 132.9 | 8.13  | 36  | 2 |
| AOA024QZR3 | Protein pel9.09090909 | 4 | 4 | 4 | 43.4  | 6.34  | 122 | 4 |
| O94888     | UBX domain- 8.1799591 | 3 | 3 | 3 | 54.8  | 5.16  | 64  | 3 |
| B2RBP3     | cDNA, FLJ910.7991361  | 4 | 5 | 4 | 51.8  | 5.45  | 41  | 4 |
| B3KQA0     | cDNA FLJ9026.7716535  | 2 | 2 | 2 | 14.5  | 4.64  | 70  | 2 |
| Q53GN7     | Mitochondri8.65603645 | 3 | 4 | 3 | 50.3  | 8.12  | 0   | 3 |
| Q5TDF0     | Cancer-relc12.2807018 | 3 | 3 | 3 | 25.1  | 9.42  | 87  | 3 |
| B2R4U3     | cDNA, FLJ9233.5195531 | 3 | 3 | 3 | 19.6  | 7.37  | 61  | 3 |
| O43653     | Prostate st14.6341463 | 2 | 2 | 2 | 12.9  | 5.29  | 98  | 2 |
| Q08554     | Desmocollin4.69798658 | 3 | 3 | 3 | 99.9  | 5.43  | 69  | 3 |
| Q6P6C2     | RNA demethy7.36040609 | 1 | 1 | 1 | 44.2  | 9.09  | 62  | 1 |
| B5BUC0     | Glycogen syl2.8571429 | 3 | 3 | 3 | 46.7  | 8.87  | 33  | 3 |
| AOA0AOMT60 | Peptidylprc3.05466238 | 3 | 4 | 3 | 136.2 | 5.21  | 68  | 3 |
| Q9H5Q4     | Dimethyladc10.3535354 | 3 | 3 | 3 | 45.3  | 9.19  | 39  | 3 |
| Q5T6F2     | Ubiquitin-c 3.5746202 | 3 | 3 | 3 | 117   | 7.34  | 64  | 3 |
| P20962     | Parathyrosi25.4901961 | 3 | 5 | 3 | 11.5  | 4.16  | 122 | 3 |
| Q86YP4     | Transcripti5.68720379 | 3 | 3 | 2 | 68    | 9.94  | 108 | 3 |
| Q5TH30     | NDRG family9.79381443 | 2 | 3 | 2 | 42.8  | 5.33  | 71  | 2 |
| Q9NP72     | Ras-relatec 27.184466 | 4 | 4 | 4 | 23    | 5.24  | 50  | 4 |
| A8K245     | cDNA FLJ7512.3737374  | 3 | 5 | 3 | 45.4  | 8.91  | 23  | 3 |

|            |                         |             |   |    |   |       |       |     |   |
|------------|-------------------------|-------------|---|----|---|-------|-------|-----|---|
| Q8TED0     | U3 small nt             | 10.8108108  | 4 | 4  | 4 | 58.4  | 9.11  | 22  | 4 |
| Q7Z2W9     | 39S ribosom             | 19.5121951  | 3 | 3  | 3 | 22.8  | 9.89  | 79  | 3 |
| Q96IJ6     | Mannose-1- $\pi$        | 12.6190476  | 4 | 4  | 4 | 46.3  | 7.21  | 64  | 4 |
| E7EW20     | Unconventic             | 3.47490347  | 2 | 2  | 2 | 149.8 | 8.51  | 47  | 2 |
| Q96GG9     | DCN1-like $\pi$         | 11.5830116  | 2 | 2  | 2 | 30.1  | 5.34  | 110 | 2 |
| Q96BN8     | Ubiquitin $\pi$         | 12.2159091  | 3 | 3  | 3 | 40.2  | 5.47  | 43  | 3 |
| AOA024QYY3 | Phosphoribc             | 13.5501355  | 4 | 6  | 2 | 40.9  | 7.44  | 24  | 4 |
| O60826     | Coiled-coil             | 7.01754386  | 2 | 2  | 2 | 70.7  | 6.74  | 0   | 2 |
| Q06265     | Exosome con             | 5.92255125  | 2 | 2  | 2 | 48.9  | 5.29  | 105 | 2 |
| Q8NBF2     | NHL repeat              | 10.4683196  | 4 | 4  | 4 | 79.4  | 5.55  | 34  | 4 |
| O60220     | Mitochondri             | 41.2371134  | 2 | 2  | 2 | 11    | 5.16  | 0   | 2 |
| B2RB95     | cDNA, FLJ9              | 7.62411348  | 3 | 3  | 3 | 63.9  | 5.49  | 68  | 3 |
| P17813     | Endoglin O              | 5.16717325  | 3 | 4  | 3 | 70.5  | 6.61  | 40  | 3 |
| Q9BSE5     | Agmatinase,             | 14.2045455  | 2 | 2  | 2 | 37.6  | 7.59  | 49  | 2 |
| Q12834     | Cell divisi             | 9.21843687  | 3 | 3  | 3 | 54.7  | 9.23  | 63  | 3 |
| P32456     | Guanylate- $\pi$        | 3.38409475  | 2 | 3  | 2 | 67.2  | 5.71  | 61  | 2 |
| Q8WXA9     | Splicing re             | 7.08661417  | 2 | 2  | 2 | 59.3  | 10.39 | 50  | 2 |
| P38432     | Coilin OS= $\pi$        | 5.90277778  | 3 | 3  | 3 | 62.6  | 9.07  | 48  | 3 |
| AOA024R539 | Uncharacter             | 11.2179487  | 2 | 3  | 2 | 35.1  | 5.35  | 35  | 2 |
| B2RDV7     | tRNA-dihyd              | 2.15384615  | 2 | 3  | 2 | 72.6  | 8.05  | 62  | 2 |
| B4DN80     | Peptidyl- $\pi$         | 11.7021277  | 2 | 2  | 2 | 33    | 9.26  | 0   | 2 |
| P29590     | Protein PMI             | 3.85487528  | 3 | 4  | 3 | 97.5  | 6.21  | 35  | 3 |
| P06454     | Prothymosin             | 25.2252252  | 2 | 13 | 2 | 12.2  | 3.78  | 389 | 2 |
| Q96E17     | Ras-relate              | 8.37004405  | 3 | 5  | 1 | 25.9  | 5.24  | 88  | 3 |
| Q13443     | Disintegrin             | 7.08180708  | 5 | 5  | 5 | 90.5  | 7.52  | 45  | 5 |
| Q9Y237     | Peptidyl- $\pi$         | 19.0839695  | 2 | 2  | 2 | 13.8  | 9.77  | 81  | 2 |
| Q96G23     | Ceramide sy             | 7.89473684  | 3 | 3  | 3 | 44.8  | 8.98  | 34  | 3 |
| Q9BUQ8     | Probable A              | 15.73170732 | 5 | 5  | 5 | 95.5  | 9.55  | 52  | 5 |
| Q96RM1     | Small proli             | 48.6111111  | 3 | 9  | 2 | 7.8   | 8.31  | 57  | 3 |
| P10644     | cAMP-depend             | 9.71128609  | 3 | 3  | 3 | 43    | 5.35  | 41  | 3 |
| Q96DX5     | Ankyrin re              | 12.244898   | 2 | 3  | 2 | 31.8  | 6.98  | 56  | 2 |
| P57737     | Coronin-7               | (6.48648649 | 4 | 4  | 4 | 100.5 | 5.8   | 62  | 4 |
| Q99590     | Protein SC              | 3.2125769   | 3 | 3  | 3 | 164.6 | 8.41  | 33  | 3 |
| Q9Y3D9     | 28S ribosom             | 23.6842105  | 3 | 3  | 3 | 21.8  | 8.9   | 64  | 3 |
| Q10570     | Cleavage ar             | 1.73250173  | 2 | 2  | 2 | 160.8 | 6.4   | 147 | 2 |
| Q9Y3P9     | Rab GTPase              | 4.11599626  | 4 | 4  | 4 | 121.7 | 5.25  | 73  | 4 |
| P07686     | Beta-hexos              | 9.17266187  | 4 | 4  | 4 | 63.1  | 6.76  | 57  | 4 |
| Q9Y3B8     | Oligoribon              | 15.1898734  | 2 | 2  | 2 | 26.8  | 6.87  | 65  | 2 |
| Q9H9P8     | L-2-hydroxy             | 7.34341253  | 2 | 2  | 2 | 50.3  | 8.15  | 51  | 2 |
| Q16186     | Proteasomal             | 12.5307125  | 3 | 4  | 3 | 42.1  | 5.07  | 56  | 3 |
| F8W0Q9     | Periphilin              | 10.1298701  | 4 | 5  | 4 | 44.7  | 8.28  | 83  | 4 |
| Q8N584     | Tetratricof             | 9.09090909  | 3 | 3  | 3 | 65.8  | 6.99  | 21  | 3 |
| B5BUD2     | Replicatio              | 9.88700565  | 3 | 3  | 3 | 39.2  | 6.44  | 84  | 3 |
| Q9UPN7     | Serine/thre             | 4.99432463  | 2 | 2  | 2 | 96.7  | 4.55  | 61  | 2 |
| BOQYD3     | DNA dC $\rightarrow$ dU | -7.14285714 | 3 | 3  | 3 | 57.2  | 6.81  | 34  | 3 |
| P82673     | 28S ribosom             | 11.4551084  | 2 | 2  | 2 | 36.8  | 8.24  | 57  | 2 |
| Q5F1R6     | DnaJ homol              | 6.5913371   | 4 | 4  | 4 | 62    | 5.47  | 40  | 4 |
| B4E263     | cDNA FLJ53              | 3.28596803  | 3 | 3  | 1 | 127.5 | 6.52  | 61  | 3 |
| Q96JM3     | Chromosome              | 4.43349754  | 3 | 4  | 3 | 89    | 8.44  | 39  | 3 |
| H3BRT0     | Sulfotransf             | 82          | 3 | 3  | 1 | 5.4   | 5.87  | 31  | 3 |
| Q15758     | Neutral ami             | 11.4602588  | 4 | 5  | 4 | 56.6  | 5.48  | 79  | 4 |
| Q96DH6     | RNA-binding             | 14.6341463  | 2 | 2  | 2 | 35.2  | 8.48  | 40  | 2 |
| Q99567     | Nuclear por             | 7.42240216  | 5 | 5  | 5 | 83.5  | 5.69  | 54  | 5 |
| Q99700     | Ataxin-2 O              | 2.58948972  | 2 | 2  | 2 | 140.2 | 9.57  | 60  | 2 |
| D3DU01     | Transmembr              | 7.15990453  | 1 | 1  | 1 | 47.5  | 6.65  | 56  | 1 |
| Q8N5M9     | Protein ja              | 6.55737705  | 1 | 2  | 1 | 21.1  | 9.73  | 100 | 1 |
| P42696     | RNA-binding             | 7.90697674  | 2 | 2  | 2 | 48.5  | 10.11 | 106 | 2 |
| B4DL54     | CHURC1-FNT              | 7.85562633  | 2 | 2  | 2 | 52.8  | 5.88  | 51  | 2 |
| Q9Y5L4     | Mitochondri             | 26.3157895  | 2 | 3  | 2 | 10.5  | 8.18  | 52  | 2 |
| AOA087XOH9 | RNA-binding             | 3.567889    | 3 | 3  | 3 | 113.7 | 9.16  | 57  | 3 |
| F1TOA5     | PRP31 pre-              | 8.21643287  | 2 | 2  | 2 | 55.4  | 5.78  | 68  | 2 |
| P35269     | General tr              | 11.4119923  | 3 | 3  | 3 | 58.2  | 7.49  | 45  | 3 |
| A0MZ66     | Shootin-1               | (8.08240887 | 4 | 4  | 4 | 71.6  | 5.33  | 0   | 4 |
| B4E0E0     | cDNA FLJ54              | 6.52920962  | 1 | 3  | 1 | 32.5  | 9.51  | 54  | 1 |
| Q9BV44     | THUMP domai             | 10.4536489  | 3 | 3  | 3 | 57    | 6.37  | 30  | 3 |
| Q9P2N5     | RNA-binding             | 3.77358491  | 2 | 2  | 2 | 118.6 | 9.19  | 66  | 2 |
| Q96TA2     | ATP-depend              | 3.62225097  | 2 | 2  | 2 | 86.4  | 8.76  | 114 | 2 |
| Q92615     | La-related              | 4.74254743  | 2 | 3  | 2 | 80.5  | 6.92  | 0   | 2 |
| P05026     | Sodium/pot              | 22.1122112  | 4 | 5  | 4 | 35    | 8.53  | 55  | 4 |
| O95602     | DNA-direct              | 2.96511628  | 4 | 4  | 4 | 194.7 | 7.03  | 47  | 4 |
| Q9Y547     | Intraflagel             | 27.7777778  | 1 | 8  | 1 | 16.3  | 5.03  | 0   | 1 |
| Q6P2I3     | Fumarylacet             | 16.2420382  | 2 | 2  | 2 | 34.6  | 7.75  | 48  | 2 |
| Q92925     | SWI/SNF-re              | 17.34463277 | 3 | 3  | 1 | 58.9  | 9.64  | 51  | 3 |
| AOA140VJL8 | Testicular              | 10.1190476  | 3 | 3  | 3 | 36.7  | 7.91  | 85  | 3 |
| Q6Y1H2     | Very-long-              | 8.66141732  | 2 | 4  | 2 | 28.4  | 9.55  | 36  | 2 |
| AOA0AOMR66 | RNA binding             | 3.71859296  | 3 | 3  | 3 | 110.3 | 6.28  | 55  | 3 |
| A5YM53     | ITGAV prote             | 3.6259542   | 3 | 3  | 3 | 116   | 5.74  | 53  | 3 |

|            |                        |   |   |   |       |       |     |   |
|------------|------------------------|---|---|---|-------|-------|-----|---|
| Q92541     | RNA polymer5.35211268  | 3 | 3 | 3 | 80.3  | 8.15  | 32  | 3 |
| Q96C23     | Aldose 1-e19.2982456   | 4 | 4 | 4 | 37.7  | 6.65  | 31  | 4 |
| Q9H0P0     | Cytosolic f16.3690476  | 3 | 6 | 3 | 37.9  | 7.12  | 52  | 3 |
| Q9H6Z4     | Ran-binding6.17283951  | 2 | 2 | 2 | 60.2  | 4.78  | 72  | 2 |
| P19823     | Inter-alpha3.59408034  | 3 | 3 | 3 | 106.4 | 6.86  | 52  | 3 |
| F5H619     | HEAT repeat1.56402737  | 3 | 3 | 3 | 222.6 | 6.55  | 57  | 3 |
| Q96G21     | U3 small m10.9965636   | 3 | 3 | 3 | 33.7  | 9.47  | 76  | 3 |
| HOYL70     | Transducin-3.32480818  | 2 | 2 | 2 | 84.4  | 7.27  | 111 | 2 |
| Q14181     | DNA polymer7.52508361  | 3 | 3 | 3 | 65.9  | 5.24  | 0   | 3 |
| B3KRQ2     | cDNA FLJ3465.24934383  | 4 | 4 | 4 | 130.9 | 6.87  | 0   | 4 |
| O60783     | 28S ribosom21.875      | 2 | 2 | 2 | 15.1  | 11.41 | 112 | 2 |
| P09758     | Tumor-assoc13.003096   | 2 | 2 | 2 | 35.7  | 8.87  | 47  | 2 |
| P62273     | 40S ribosom33.9285714  | 2 | 3 | 2 | 6.7   | 10.13 | 66  | 2 |
| P49750     | YLP motif-c2.46027678  | 3 | 3 | 3 | 219.8 | 6.57  | 0   | 3 |
| P46109     | Crk-like pr9.24092409  | 3 | 3 | 3 | 33.8  | 6.74  | 72  | 3 |
| Q96GM8     | Target of f10.9803922  | 4 | 4 | 4 | 56.5  | 7.18  | 42  | 4 |
| AOA140VKA9 | Testis secr16.3934426  | 3 | 3 | 3 | 25.8  | 7.37  | 0   | 3 |
| Q9NX18     | Succinate c12.0481928  | 2 | 4 | 1 | 19.6  | 6.8   | 38  | 2 |
| Q81XB1     | DnaJ homolc3.27868852  | 2 | 2 | 2 | 91    | 7.18  | 72  | 2 |
| Q00653     | Nuclear fac5.11111111  | 4 | 4 | 4 | 96.7  | 6.25  | 51  | 4 |
| Q96J01     | THO comple11.3960114   | 4 | 4 | 4 | 38.7  | 6.09  | 49  | 4 |
| B2RAR2     | cDNA, FLJ966.31067961  | 2 | 3 | 2 | 46.6  | 7.18  | 0   | 2 |
| P56270     | Myc-associa8.17610063  | 3 | 4 | 3 | 48.6  | 8.95  | 31  | 3 |
| P29353     | SHC-transfc7.03259005  | 3 | 3 | 3 | 62.8  | 6.44  | 37  | 3 |
| B2R7X3     | cDNA, FLJ969.83899821  | 3 | 3 | 3 | 61.5  | 7.49  | 82  | 3 |
| Q5J TZ9    | Alanine-tf3.95939086   | 3 | 3 | 3 | 107.3 | 6.27  | 53  | 3 |
| Q14165     | Malectin O8.56164384   | 2 | 2 | 2 | 32.2  | 5.41  | 87  | 2 |
| O75152     | Zinc finger4.32098765  | 3 | 3 | 3 | 89.1  | 8.37  | 91  | 3 |
| Q8N766     | ER membran3.62537764   | 2 | 2 | 2 | 111.7 | 7.66  | 58  | 2 |
| BO1IT2     | Unconventic3.83104126  | 3 | 3 | 3 | 116.4 | 8.73  | 44  | 3 |
| AOA024ROM6 | Translocas7.89473684   | 4 | 4 | 4 | 50.4  | 9.42  | 38  | 4 |
| P15291     | Beta-1,4-g5.02512563   | 1 | 2 | 1 | 43.9  | 8.65  | 82  | 1 |
| B4DJV9     | cDNA FLJ6014.0684411   | 3 | 3 | 3 | 28.3  | 7.64  | 63  | 3 |
| Q96LJ7     | Dehydrogen13.0990415   | 2 | 4 | 2 | 33.9  | 7.83  | 35  | 2 |
| Q9NT62     | Ubiquitin-17.6433121   | 2 | 2 | 2 | 35.8  | 4.74  | 69  | 2 |
| Q9UNP9     | Peptidyl-pr14.9501661  | 4 | 4 | 4 | 33.4  | 5.6   | 63  | 4 |
| Q9H9Y2     | Ribosome pr8.30945559  | 2 | 3 | 2 | 40.1  | 10.01 | 0   | 2 |
| AOA024R2M7 | Oxidative-c12.5237192  | 4 | 4 | 4 | 58    | 6.43  | 0   | 4 |
| Q5SW79     | Centrosomal1.57828283  | 2 | 2 | 2 | 175.2 | 7.11  | 75  | 2 |
| AOA024R6I7 | Alpha-1-ant9.80861244  | 4 | 4 | 4 | 46.7  | 5.59  | 55  | 4 |
| Q92599     | Septin-8 O6.83229814   | 3 | 6 | 1 | 55.7  | 6.28  | 82  | 3 |
| C9JIF9     | Acylamino-e6.51289009  | 4 | 5 | 4 | 81.6  | 5.54  | 73  | 4 |
| AOA024R333 | Transmembr9.26517572   | 2 | 2 | 2 | 35.1  | 7.69  | 36  | 2 |
| B2RE11     | cDNA, FLJ968.52272727  | 1 | 3 | 1 | 18.4  | 9.44  | 27  | 1 |
| B2R7G6     | cDNA, FLJ969.88142292  | 4 | 5 | 1 | 56.9  | 8.02  | 98  | 4 |
| Q13136     | Liprin-alf2.24625624   | 2 | 2 | 2 | 135.7 | 6.29  | 54  | 2 |
| Q7L5Y1     | Mitochondri9.25507901  | 2 | 2 | 2 | 49.8  | 6.48  | 0   | 2 |
| Q9Y2A7     | Nck-associa3.72340426  | 3 | 3 | 3 | 128.7 | 6.62  | 73  | 3 |
| G3V4T6     | Maleylacet11.9815668   | 2 | 3 | 2 | 24.2  | 7.18  | 57  | 2 |
| P61960     | Ubiquitin-141.1764706  | 1 | 1 | 1 | 9.1   | 9.31  | 66  | 1 |
| Q9H6T3     | RNA polymer6.16541353  | 4 | 4 | 4 | 75.7  | 6.84  | 58  | 4 |
| Q9Y3Z3     | Deoxynuclec5.75079872  | 3 | 3 | 3 | 72.2  | 7.14  | 45  | 3 |
| Q8N983     | 39S ribosom10.2325581  | 2 | 2 | 2 | 23.4  | 8.65  | 90  | 2 |
| P62304     | Small nuclc29.3478261  | 3 | 4 | 3 | 10.8  | 9.44  | 64  | 3 |
| E7EWR4     | Cleavage st5.52763819  | 3 | 4 | 2 | 62.9  | 6.87  | 71  | 3 |
| Q6LAP8     | Mitochondri7.2327044   | 2 | 3 | 2 | 34.8  | 9.89  | 47  | 2 |
| D3DU92     | RNA binding16.3934426  | 3 | 3 | 3 | 34.2  | 11.84 | 60  | 3 |
| AOA0S2Z5M1 | SEC63-like5.13157895   | 3 | 3 | 3 | 87.9  | 5.31  | 20  | 3 |
| Q8TF05     | Serine/thrc2.52631579  | 2 | 2 | 2 | 106.9 | 4.77  | 88  | 2 |
| B5BTZ8     | Small nuclc11.11111111 | 2 | 2 | 2 | 25.4  | 9.72  | 35  | 2 |
| Q99543     | DnaJ homolc6.92431562  | 3 | 3 | 3 | 72    | 8.7   | 46  | 3 |
| Q9H2J4     | Phosducin-119.2468619  | 2 | 2 | 2 | 27.6  | 4.84  | 42  | 2 |
| Q9UI12     | V-type prot7.86749482  | 2 | 2 | 2 | 55.8  | 6.48  | 44  | 2 |
| AOA0A0MTC1 | E3 ubiquiti1.16057839  | 4 | 4 | 4 | 596.1 | 6.42  | 17  | 4 |
| B2R932     | cDNA, FLJ9615.1351351  | 2 | 2 | 2 | 18.9  | 4.82  | 73  | 2 |
| Q13618     | Cullin-3 O6.6.25       | 4 | 4 | 4 | 88.9  | 8.48  | 41  | 4 |
| P05362     | Intercellul5.63909774  | 2 | 2 | 2 | 57.8  | 7.99  | 72  | 2 |
| O95394     | Phosphoacet10.3321033  | 3 | 3 | 3 | 59.8  | 6.25  | 33  | 3 |
| Q32Q14     | NDUFA7 prot15.7024793  | 2 | 2 | 2 | 13.5  | 10.4  | 29  | 2 |
| Q7Z4Q2     | HEAT repeat5.58823529  | 3 | 3 | 3 | 74.5  | 5.11  | 48  | 3 |
| P36405     | ADP-ribosyl20.8791209  | 3 | 3 | 3 | 20.4  | 7.24  | 72  | 3 |
| E5RG17     | Putative dc9.62732919  | 2 | 2 | 2 | 36.4  | 7.65  | 36  | 2 |
| POC7P4     | Putative cy20.1413428  | 3 | 3 | 3 | 30.8  | 8.87  | 36  | 3 |
| P52306     | Rap1 GTPasc5.27182867  | 2 | 2 | 2 | 66.3  | 5.31  | 55  | 2 |
| B4DLM8     | cDNA FLJ5613.73831776  | 2 | 2 | 2 | 95    | 6.58  | 44  | 2 |
| H3BQK9     | Microtubulc0.68493151  | 4 | 4 | 4 | 860.5 | 5.38  | 35  | 4 |
| Q8N1G2     | Cap-specifi6.46706587  | 5 | 5 | 5 | 95.3  | 7.05  | 38  | 5 |

|            |                        |      |   |   |   |       |       |     |   |
|------------|------------------------|------|---|---|---|-------|-------|-----|---|
| Q9HD33     | 39S ribosom            | 13.6 | 3 | 3 | 3 | 29.4  | 10.37 | 36  | 3 |
| Q14789     | Golgin subf0.98189629  |      | 2 | 2 | 2 | 375.8 | 5     | 61  | 2 |
| AOA087WXU3 | Extended sy4.01737242  |      | 3 | 3 | 3 | 102.3 | 9.26  | 30  | 3 |
| B2RE40     | cDNA, FLJ9613.1205674  |      | 2 | 3 | 2 | 31.5  | 4.59  | 39  | 2 |
| Q6P587     | Acylpyruvas20.0892857  |      | 2 | 2 | 2 | 24.8  | 7.39  | 0   | 2 |
| O75629     | Protein CRI9.54545455  |      | 1 | 1 | 1 | 24.1  | 7.59  | 47  | 1 |
| B2R7U4     | cDNA, FLJ9619.72222222 |      | 2 | 2 | 2 | 32.8  | 8.25  | 71  | 2 |
| P62310     | U6 snRNA-as40.1960784  |      | 3 | 4 | 3 | 11.8  | 4.7   | 71  | 3 |
| Q9NVH1     | DnaJ homolog5.90339893 |      | 2 | 2 | 2 | 63.2  | 8.4   | 52  | 2 |
| AOA024R5X7 | ClpX casein4.58135861  |      | 3 | 3 | 3 | 69.2  | 7.58  | 75  | 3 |
| AOAOK2GN21 | BCKDHB prot10.4591837  |      | 2 | 3 | 2 | 43.1  | 6.61  | 37  | 2 |
| Q59GX2     | Solute carri7.15667311 |      | 3 | 3 | 3 | 57    | 9.47  | 65  | 3 |
| B2RAL9     | Dual speci18.33333333  |      | 2 | 2 | 2 | 41.8  | 6.33  | 80  | 2 |
| P49770     | Translatior18.5185185  |      | 4 | 4 | 4 | 39    | 6.16  | 0   | 4 |
| AOA087WW40 | Endophilin-7.36040609  |      | 2 | 2 | 1 | 44.2  | 6.44  | 77  | 2 |
| Q9BUR5     | MICOS compl15.6565657  |      | 2 | 2 | 2 | 22.3  | 9.13  | 68  | 2 |
| Q53Y06     | ATPase, H+ 9.2920354   |      | 3 | 3 | 3 | 26.1  | 8     | 85  | 3 |
| B3KWN0     | cDNA FLJ4362.13754647  |      | 1 | 1 | 1 | 115   | 6.51  | 67  | 1 |
| Q53GD1     | Guanine nuc45.83333333 |      | 2 | 2 | 2 | 8     | 8.97  | 71  | 2 |
| Q8TEM4     | FLJ00169 p18.33333333  |      | 3 | 3 | 3 | 46.5  | 11.55 | 0   | 3 |
| Q9UBC2     | Epidermal g1.85185185  |      | 1 | 1 | 1 | 94.2  | 5.11  | 98  | 1 |
| AOAOS2Z5P2 | GINS compl10.5882353   |      | 2 | 3 | 2 | 28.8  | 5.24  | 97  | 2 |
| O43920     | NADH dehydr25.4716981  |      | 2 | 2 | 2 | 12.5  | 9.14  | 52  | 2 |
| Q9NWU2     | Glucose-inc21.0526316  |      | 2 | 3 | 2 | 26.7  | 4.97  | 40  | 2 |
| B2R8K8     | cDNA, FLJ9618.2781457  |      | 2 | 2 | 2 | 34.5  | 8.25  | 46  | 2 |
| Q9HCC0     | Methylcroto3.55239787  |      | 1 | 1 | 1 | 61.3  | 7.68  | 40  | 1 |
| Q8NC56     | LEM domain- 9.7415507  |      | 2 | 2 | 2 | 56.9  | 9     | 0   | 2 |
| B3KX14     | cDNA FLJ4415.2777778   |      | 3 | 3 | 3 | 32.3  | 9.72  | 31  | 3 |
| Q8NFH3     | Nucleoporin4.47368421  |      | 1 | 1 | 1 | 42.1  | 5.63  | 84  | 1 |
| Q96QA5     | Gasdermin-/5.84269663  |      | 2 | 2 | 2 | 49.3  | 5.29  | 101 | 2 |
| Q9Y2S6     | Translatior 21.875     |      | 1 | 3 | 1 | 7.1   | 9.99  | 73  | 1 |
| K7ESQ2     | Kinetochore18.1818182  |      | 2 | 2 | 2 | 23.5  | 4.86  | 25  | 2 |
| Q969E8     | Pre-rRNA-p10.9947644   |      | 2 | 2 | 2 | 20.9  | 4.39  | 82  | 2 |
| AOAOC4DFX9 | Negative el4.45269017  |      | 2 | 2 | 2 | 58.5  | 9.26  | 81  | 2 |
| Q9ULR0     | Pre-mRNA-s1 10.877193  |      | 3 | 3 | 3 | 33    | 5.17  | 55  | 3 |
| AOAVT1     | Ubiquitin-l 3.8973384  |      | 4 | 4 | 4 | 117.9 | 6.14  | 34  | 4 |
| J3KQ18     | D-dopachro17.4242424   |      | 2 | 3 | 2 | 14.2  | 7.3   | 60  | 2 |
| Q9UKL0     | REST corep14.74226804  |      | 2 | 2 | 2 | 53.3  | 7.03  | 68  | 2 |
| Q9Y3B3     | Transmembr10.2678571   |      | 2 | 2 | 2 | 25.2  | 6.89  | 84  | 2 |
| Q9Y221     | 60S ribosom31.6666667  |      | 3 | 5 | 3 | 20.4  | 8.51  | 29  | 3 |
| Q86SX6     | Glutaredoxi14.0127389  |      | 3 | 4 | 3 | 16.6  | 6.79  | 64  | 3 |
| A5YKK6     | CCR4-NOT tr1.43097643  |      | 3 | 3 | 3 | 266.8 | 7.11  | 32  | 3 |
| Q6NZY4     | Zinc finger5.79915134  |      | 2 | 2 | 2 | 78.5  | 4.87  | 38  | 2 |
| Q5JSH3     | WD repeat-c6.02409639  |      | 3 | 5 | 3 | 101.3 | 5.45  | 42  | 3 |
| AOA087WV05 | Uncharacter19.0909091  |      | 2 | 2 | 2 | 12.7  | 6.02  | 31  | 2 |
| Q08209     | Serine/thre6.52591171  |      | 3 | 3 | 3 | 58.7  | 5.86  | 56  | 3 |
| Q9NYH9     | U3 small nt 5.360134   |      | 3 | 3 | 3 | 70.1  | 7.28  | 62  | 3 |
| P18031     | Tyrosine-p18.04597701  |      | 2 | 2 | 2 | 49.9  | 6.27  | 42  | 2 |
| Q59GR1     | Niemann-Pic3.02560124  |      | 3 | 3 | 3 | 143.1 | 5.45  | 0   | 3 |
| Q9BUL8     | Programmed 14.1509434  |      | 2 | 2 | 2 | 24.7  | 8.19  | 50  | 2 |
| Q96AY3     | Peptidyl-p16.18556701  |      | 4 | 5 | 4 | 64.2  | 5.62  | 45  | 4 |
| Q9H3S7     | Tyrosine-p12.50611247  |      | 2 | 2 | 2 | 178.9 | 6.92  | 32  | 2 |
| O14949     | Cytochrome 36.5853659  |      | 3 | 3 | 3 | 9.9   | 10.08 | 61  | 3 |
| Q4J6C6     | Prolyl endc5.22696011  |      | 2 | 2 | 2 | 83.9  | 6.38  | 0   | 2 |
| Q96RS6     | NudC domair8.40480274  |      | 3 | 3 | 3 | 66.7  | 5.11  | 65  | 3 |
| Q9UH65     | Switch-assc5.12820513  |      | 3 | 4 | 3 | 69    | 5.87  | 36  | 3 |
| Q16831     | Uridine phc6.12903226  |      | 1 | 1 | 1 | 33.9  | 7.88  | 47  | 1 |
| Q9Y508     | E3 ubiquiti6.14035088  |      | 2 | 3 | 2 | 25.7  | 7.25  | 38  | 2 |
| Q9Y639     | Neuroplastj7.03517588  |      | 2 | 3 | 2 | 44.4  | 7.99  | 0   | 2 |
| C9JA93     | TBC1 domair11.5107914  |      | 2 | 2 | 1 | 32.1  | 8.84  | 71  | 2 |
| Q9H9A6     | Leucine-ric8.63787375  |      | 5 | 5 | 5 | 68.2  | 6.43  | 31  | 5 |
| Q9NUG6     | p53 and DN12.7819549   |      | 1 | 1 | 1 | 15.5  | 6.06  | 78  | 1 |
| Q9Y2S7     | Polymerase 4.34782609  |      | 1 | 1 | 1 | 42    | 8.63  | 107 | 1 |
| AOA023QXNO | ATP synthas13.2352941  |      | 2 | 4 | 2 | 8     | 10.1  | 0   | 2 |
| Q9NY12     | H/ACA ribor14.2857143  |      | 2 | 2 | 2 | 22.3  | 10.92 | 52  | 2 |
| AOA024R8J2 | Protein ty18.09248555  |      | 1 | 2 | 1 | 19.8  | 8.97  | 0   | 1 |
| Q96L92     | Sorting ne9.05730129   |      | 4 | 4 | 4 | 61.2  | 6.49  | 46  | 4 |
| X6R4W8     | BUB3-inter15.23138833  |      | 2 | 2 | 2 | 52.6  | 8.47  | 71  | 2 |
| B4DGD9     | cDNA FLJ6119.75609756  |      | 2 | 3 | 2 | 32.4  | 7.14  | 37  | 2 |
| Q92620     | Pre-mRNA-s12.77098615  |      | 2 | 2 | 2 | 140.4 | 6.54  | 33  | 2 |
| Q8N543     | Prolyl 3-hy5.53505535  |      | 2 | 2 | 2 | 63.2  | 5.11  | 43  | 2 |
| Q9NZ08     | Endoplasmic2.44420829  |      | 2 | 2 | 2 | 107.2 | 6.46  | 46  | 2 |
| Q9NRL2     | Bromodomair1.41388175  |      | 2 | 2 | 2 | 178.6 | 6.6   | 71  | 2 |
| Q9Y3D8     | Adenylate t14.5348837  |      | 2 | 2 | 2 | 20    | 4.58  | 84  | 2 |
| Q9NX08     | COMM domair16.3934426  |      | 2 | 3 | 1 | 21.1  | 5.43  | 47  | 2 |
| P49916     | DNA ligase 5.55004955  |      | 3 | 4 | 3 | 112.8 | 9.01  | 61  | 3 |
| P36954     | DNA-directc 28.8       |      | 2 | 2 | 2 | 14.5  | 5.14  | 0   | 2 |

|            |                    |            |   |   |   |       |       |     |   |
|------------|--------------------|------------|---|---|---|-------|-------|-----|---|
| P18084     | Integrin $\beta$ 3 | 7.5469337  | 2 | 2 | 2 | 88    | 6.06  | 63  | 2 |
| I3VM53     | F-box and 11       | 8.0722892  | 2 | 3 | 2 | 132.7 | 7.58  | 67  | 2 |
| P46926     | Glucosaminidase    | 8.99653979 | 2 | 3 | 2 | 32.6  | 6.92  | 46  | 2 |
| Q14643     | Inositol 1, 1      | 7.7664975  | 5 | 5 | 2 | 313.7 | 6.04  | 39  | 5 |
| O15260     | Surfeit loc11      | 5.241636   | 3 | 4 | 3 | 30.4  | 7.78  | 58  | 3 |
| AOA0A0MSV9 | Tapasin OS=        | 6.74603175 | 4 | 4 | 4 | 53.9  | 7.08  | 42  | 4 |
| B2R9H3     | cDNA, FLJ9=        | 8.02139037 | 3 | 3 | 1 | 42.7  | 5.47  | 88  | 3 |
| Q5SRD1     | Putative mi6       | 6.61478599 | 1 | 1 | 1 | 28    | 9.39  | 88  | 1 |
| P42566     | Epidermal $\xi$    | 3.125      | 2 | 2 | 2 | 98.6  | 4.64  | 41  | 2 |
| P63172     | Dynein lig1        | 14.159292  | 1 | 2 | 1 | 12.4  | 5.08  | 0   | 1 |
| Q13425     | Beta-2-synt4       | 2.25925926 | 2 | 3 | 2 | 57.9  | 8.82  | 62  | 2 |
| Q9BRP1     | Programmed 11      | 1.1731844  | 3 | 3 | 3 | 39.4  | 4.86  | 23  | 3 |
| AOA087XOM4 | Kanadaplin         | 6.19946092 | 2 | 2 | 2 | 82.8  | 5.1   | 23  | 2 |
| Q96K76     | Ubiquitin c2       | 6.69090909 | 3 | 3 | 3 | 157.2 | 5.08  | 49  | 3 |
| P62070     | Ras-related c11    | 1.2745098  | 2 | 2 | 2 | 23.4  | 6.01  | 58  | 2 |
| AOA087X117 | Nodal modul3       | 5.5169692  | 4 | 4 | 4 | 139.4 | 5.85  | 28  | 4 |
| B4DMM7     | cDNA FLJ5975       | 5.58464223 | 3 | 3 | 3 | 63.3  | 5.2   | 48  | 3 |
| Q9BZF9     | Uveal auto c1      | 1.97740113 | 2 | 2 | 2 | 162.4 | 7.03  | 52  | 2 |
| O75676     | Ribosomal r5       | 5.56994819 | 4 | 4 | 4 | 85.6  | 8.28  | 42  | 4 |
| K7ELG9     | Protein LSM14      | 3.3478261  | 2 | 2 | 2 | 24.9  | 7.42  | 51  | 2 |
| O95218     | Zinc finger6       | 6.66666667 | 2 | 3 | 2 | 37.4  | 10.01 | 65  | 2 |
| Q01664     | Transcript i4      | 7.3372781  | 1 | 2 | 1 | 38.7  | 5.87  | 46  | 1 |
| B2RAH5     | Protein phc3       | 8.88349515 | 3 | 3 | 3 | 115.3 | 5.43  | 53  | 3 |
| P78310     | Coxsackievir7      | 1.12328767 | 2 | 2 | 2 | 40    | 7.56  | 38  | 2 |
| Q8IVS2     | Malonyl-CoA8       | 8.71794872 | 2 | 2 | 2 | 42.9  | 8.72  | 0   | 2 |
| Q08188     | Protein-glu5       | 7.7200577  | 3 | 3 | 3 | 76.6  | 5.86  | 46  | 3 |
| AOA0C4DFU2 | Superoxide 10      | 1.3603604  | 2 | 2 | 2 | 24.7  | 8.25  | 59  | 2 |
| Q6NUQ4     | Transmembrane7     | 7.54716981 | 3 | 6 | 3 | 77.1  | 9.14  | 37  | 3 |
| AOA0S2Z5C3 | PAK1 inter c4      | 3.3673469  | 1 | 2 | 1 | 43.9  | 8.91  | 0   | 1 |
| P60468     | Protein trc26      | 1.0416667  | 2 | 3 | 2 | 10    | 11.56 | 43  | 2 |
| Q6P1M0     | Long-chain 6       | 1.22083981 | 3 | 3 | 3 | 72    | 8.47  | 36  | 3 |
| AOA0C4DFN3 | Monoglycerin11     | 1.1821086  | 2 | 2 | 2 | 34.3  | 6.58  | 22  | 2 |
| Q14210     | Lymphocyte 19      | 1.53125    | 3 | 4 | 3 | 13.3  | 8.21  | 49  | 3 |
| Q5QPA5     | 39S ribosom4       | 1.18250951 | 1 | 2 | 1 | 29.6  | 10.7  | 51  | 1 |
| A8K8F6     | cDNA FLJ78 c6      | 1.16246499 | 1 | 1 | 1 | 41.4  | 9.06  | 63  | 1 |
| AOA0C4MVT1 | Bax protein6       | 1.37254902 | 1 | 1 | 1 | 22.6  | 5.31  | 87  | 1 |
| P09110     | 3-ketoacyl-7       | 1.54716981 | 2 | 2 | 2 | 44.3  | 8.44  | 60  | 2 |
| HOY2S9     | Myosin phosph2     | 2.28539576 | 3 | 3 | 3 | 203.4 | 5.22  | 44  | 3 |
| Q9HC36     | rRNA methyl9       | 1.28571429 | 2 | 2 | 2 | 47    | 8.73  | 69  | 2 |
| Q12959     | Disks large3       | 3.42920354 | 2 | 2 | 2 | 100.4 | 5.76  | 49  | 2 |
| AOA024R9D9 | Transcript i34     | 1.6534653  | 3 | 5 | 3 | 11.5  | 9.33  | 26  | 3 |
| Q5T749     | Keratinocyte4      | 1.66321244 | 3 | 4 | 3 | 64.1  | 8.27  | 39  | 3 |
| Q9H8Y5     | Ankyrin re f5      | 1.23415978 | 3 | 3 | 3 | 80.9  | 8.41  | 43  | 3 |
| Q9H6S3     | Epidermal $\xi$ 3  | 1.77622378 | 2 | 2 | 2 | 80.6  | 6.84  | 62  | 2 |
| Q9UIC8     | Leucine car5       | 1.98802395 | 2 | 2 | 2 | 38.4  | 6.04  | 37  | 2 |
| Q5HY81     | Ubiquitin-114      | 1.4444444  | 2 | 2 | 2 | 20.5  | 9.55  | 48  | 2 |
| Q59FC3     | G protein-c3       | 1.10077519 | 2 | 2 | 2 | 85.8  | 7.09  | 0   | 2 |
| Q9HA77     | Probable c3        | 1.19148936 | 1 | 1 | 1 | 62.2  | 8.34  | 72  | 1 |
| P57088     | Transmembrane8     | 1.09716599 | 2 | 2 | 2 | 28    | 9.7   | 76  | 2 |
| P50583     | Bis(5'-nuc19       | 1.52380952 | 1 | 1 | 1 | 16.8  | 5.35  | 65  | 1 |
| Q01415     | N-acetylglal4      | 1.58515284 | 2 | 2 | 2 | 50.3  | 6.61  | 61  | 2 |
| A8K5N5     | cDNA FLJ7814       | 1.03916769 | 3 | 3 | 3 | 89.7  | 6.04  | 66  | 3 |
| HOYMD1     | Low-density3       | 1.58649789 | 2 | 3 | 2 | 104.7 | 5.5   | 29  | 2 |
| C9JJ19     | 28S ribosom9       | 1.77777778 | 2 | 3 | 2 | 26.3  | 9.89  | 42  | 2 |
| MOQXB5     | Persulfide 17      | 1.3076923  | 3 | 3 | 3 | 28.4  | 6.52  | 24  | 3 |
| P30049     | ATP synthase17     | 1.2619048  | 3 | 3 | 3 | 17.5  | 5.49  | 69  | 3 |
| P17301     | Integrin al 3      | 1.3022862  | 3 | 3 | 3 | 129.2 | 5.31  | 66  | 3 |
| Q13405     | 39S ribosom16      | 1.2650602  | 2 | 2 | 2 | 19.2  | 9.45  | 45  | 2 |
| P57105     | Synaptojanin19     | 1.3103448  | 2 | 3 | 2 | 15.9  | 6.3   | 39  | 2 |
| Q96RE7     | Nucleus acc8       | 1.15939279 | 3 | 4 | 3 | 57.2  | 5.74  | 37  | 3 |
| Q562T7     | Actin-like 29      | 1.1262136  | 1 | 2 | 1 | 11.4  | 6.67  | 0   | 1 |
| Q99614     | Tetratricol11      | 1.6438356  | 3 | 3 | 3 | 33.5  | 4.84  | 25  | 3 |
| O95453     | Poly(A)-spe4       | 1.22535211 | 2 | 2 | 2 | 73.4  | 6.2   | 59  | 2 |
| O75477     | Erlin-1 OS=        | 10.6936416 | 3 | 3 | 2 | 38.9  | 7.87  | 36  | 3 |
| Q9Y320     | Thioredoxin 12     | 1.5        | 2 | 2 | 2 | 34    | 8.69  | 46  | 2 |
| Q5VT66     | Mitochondrial2     | 1.462908   | 3 | 3 | 3 | 37.5  | 8.88  | 19  | 3 |
| Q96ST3     | Paired amp2        | 1.43519246 | 3 | 3 | 3 | 145.1 | 7.25  | 29  | 3 |
| AOA024QZ09 | OTU domain 2       | 1.97723292 | 1 | 1 | 1 | 60.6  | 6.54  | 77  | 1 |
| Q5IRN4     | Myocyte en f5      | 1.48523207 | 2 | 3 | 1 | 50.4  | 7.44  | 141 | 2 |
| Q5JS54     | Proteasome 20      | 1.3252033  | 1 | 1 | 1 | 13.8  | 6.52  | 67  | 1 |
| B7ZKS3     | Ubiquitin s1       | 1.64251208 | 1 | 1 | 1 | 118.9 | 6     | 84  | 1 |
| Q9NYL4     | Peptidyl-pr14      | 1.9253731  | 2 | 2 | 2 | 22.2  | 9.39  | 39  | 2 |
| Q9UIL1     | Short coil c11     | 1.3207547  | 1 | 1 | 1 | 18    | 8.85  | 53  | 1 |
| Q9Y2T2     | AP-3 complex9      | 1.09090909 | 2 | 3 | 2 | 46.9  | 6.93  | 40  | 2 |
| Q96KA5     | Cleft lip c4       | 1.83271375 | 3 | 3 | 3 | 62.2  | 8.56  | 34  | 3 |
| Q9H330     | Transmembrane2     | 1.52469813 | 2 | 2 | 2 | 100.9 | 8.87  | 40  | 2 |
| A8MWD9     | Putative sn17      | 1.1052632  | 1 | 2 | 1 | 8.5   | 8.84  | 68  | 1 |

|            |                          |   |   |   |       |       |    |   |
|------------|--------------------------|---|---|---|-------|-------|----|---|
| 075616     | GTPase Era, 6.1784897    | 2 | 2 | 2 | 48.3  | 8.84  | 29 | 2 |
| F6VJE8     | U3 small nt 37.2093023   | 3 | 3 | 3 | 4.6   | 8.27  | 0  | 3 |
| B2R6D8     | CDC42 effec 16.011236    | 3 | 3 | 3 | 38    | 5.19  | 20 | 3 |
| Q9Y3Q3     | Transmembrε 4.60829493   | 1 | 2 | 1 | 24.8  | 5.6   | 66 | 1 |
| Q9COD9     | Ethanolamir 4.53400504   | 1 | 1 | 1 | 45.2  | 6.6   | 59 | 1 |
| Q9BW27     | Nuclear por 3.96341463   | 2 | 2 | 2 | 75    | 5.55  | 34 | 2 |
| 015514     | DNA-directε 32.3943662   | 2 | 2 | 2 | 16.3  | 4.79  | 0  | 2 |
| A8K2G0     | Secretory cε 6.80473373  | 1 | 1 | 1 | 37.8  | 7.11  | 55 | 1 |
| Q9P2R3     | Rabankyrin-2.22412318    | 2 | 2 | 2 | 128.3 | 6.1   | 56 | 2 |
| Q7Z7E8     | Ubiquitin-ε 6.39810427   | 2 | 2 | 2 | 46.1  | 5.1   | 83 | 2 |
| G5EA03     | LIM and call.90865712    | 2 | 2 | 2 | 164.3 | 6.35  | 64 | 2 |
| A0A140VJI4 | Testicular 18.0327869    | 2 | 2 | 2 | 13.3  | 8.35  | 48 | 2 |
| P81605     | Dermcidin (12.7272727    | 1 | 1 | 1 | 11.3  | 6.54  | 60 | 1 |
| Q9P032     | NADH dehydε 17.1428571   | 3 | 3 | 3 | 20.3  | 8.82  | 60 | 3 |
| Q9BRX8     | Redox-regulε 7.86026201  | 1 | 2 | 1 | 25.7  | 8.84  | 44 | 1 |
| 095070     | Protein YII 4.09556314   | 1 | 2 | 1 | 32    | 8.95  | 56 | 1 |
| Q9BWE0     | Replicatioε 5.46737213   | 2 | 2 | 2 | 63.5  | 9.98  | 76 | 2 |
| Q9UKF6     | Cleavage ar 3.07017544   | 2 | 2 | 2 | 77.4  | 5.6   | 44 | 2 |
| A8K489     | cDNA FLJ7618.58585859    | 2 | 3 | 2 | 44.2  | 5.25  | 43 | 2 |
| Q92481     | Transcriptiε 4.34782609  | 1 | 1 | 1 | 50.4  | 8.24  | 46 | 1 |
| Q9NX46     | Poly(ADP-ri)ε 9.36639118 | 3 | 3 | 3 | 38.9  | 5.07  | 0  | 3 |
| P32926     | Desmoglein- 4.004004     | 2 | 2 | 2 | 107.5 | 5     | 0  | 2 |
| A0A024R8Y2 | POU domain 2.82637954    | 1 | 1 | 1 | 76.4  | 6.81  | 49 | 1 |
| Q6UVK1     | Chondroitin 1.1627907    | 2 | 2 | 2 | 250.4 | 5.47  | 50 | 2 |
| P25490     | Transcripti 11.352657    | 3 | 3 | 3 | 44.7  | 6.25  | 48 | 3 |
| Q9NTI5     | Sister chrε 2.21147201   | 3 | 3 | 2 | 164.6 | 8.47  | 32 | 3 |
| Q9BQ75     | Protein CMε 12.5448029   | 3 | 3 | 3 | 31.9  | 9.19  | 40 | 3 |
| Q9NWV4     | UPF0587 prε 30           | 3 | 3 | 3 | 18    | 5.01  | 29 | 3 |
| D6RCF4     | CDGSH iron-9.65517241    | 1 | 1 | 1 | 16.1  | 9.14  | 78 | 1 |
| A0A087WU53 | Magnesium ε 9.80926431   | 3 | 3 | 3 | 41.5  | 9.94  | 33 | 3 |
| 060885     | Bromodomair 2.20264317   | 3 | 3 | 3 | 152.1 | 9.19  | 38 | 3 |
| P63218     | Guanine nuc 25           | 3 | 3 | 3 | 7.3   | 9.85  | 76 | 3 |
| Q9UNI6     | Dual speciε 15.58823529  | 1 | 1 | 1 | 37.7  | 6.84  | 42 | 1 |
| Q13065     | G antigen 131.6546763    | 2 | 4 | 2 | 15.6  | 4.44  | 24 | 2 |
| Q96ER9     | Coiled-coil 7.54257908   | 2 | 3 | 2 | 45.8  | 8.19  | 33 | 2 |
| Q9BU61     | NADH dehydε 13.5869565   | 2 | 2 | 2 | 20.3  | 8.22  | 0  | 2 |
| 000217     | NADH dehydε 12.3809524   | 2 | 3 | 2 | 23.7  | 6.34  | 0  | 2 |
| Q96E11     | Ribosome-rε 11.0687023   | 2 | 2 | 2 | 29.3  | 9.79  | 61 | 2 |
| Q53Y03     | COX4 neighε 18.0952381   | 2 | 3 | 2 | 23.8  | 6.4   | 32 | 2 |
| 075165     | DnaJ homolε 1.15916184   | 2 | 2 | 2 | 254.3 | 6.74  | 53 | 2 |
| B1AKR6     | Dynein ligε 14.1891892   | 1 | 1 | 1 | 16.2  | 7.02  | 0  | 1 |
| A0A0S2Z462 | ArfGAP witε 3.82059801   | 1 | 1 | 1 | 62.6  | 8.56  | 0  | 1 |
| B2R7C2     | cDNA, FLJ9ε 2.05391528   | 2 | 2 | 2 | 88.8  | 6.27  | 0  | 2 |
| Q86XZ4     | Spermatoger 4.95412844   | 2 | 2 | 2 | 59.5  | 8.9   | 42 | 2 |
| P61927     | 60S ribosomε 27.8350515  | 4 | 6 | 4 | 11.1  | 11.74 | 38 | 4 |
| Q5TDH0     | Protein DD1 7.01754386   | 2 | 2 | 2 | 44.5  | 5.05  | 31 | 2 |
| A0A024R6R1 | SHC SH2-donε 4.61309524  | 2 | 2 | 2 | 75.6  | 4.75  | 44 | 2 |
| 075146     | Huntingtin- 3.74531835   | 3 | 3 | 3 | 119.3 | 6.67  | 47 | 3 |
| Q9H7E9     | UPF0488 prε 6.98689956   | 1 | 1 | 1 | 25    | 9.95  | 71 | 1 |
| P49593     | Protein phε 7.04845815   | 2 | 2 | 2 | 49.8  | 5.1   | 32 | 2 |
| Q00534     | Cyclin-depeε 7.05521472  | 2 | 3 | 1 | 36.9  | 6.46  | 92 | 2 |
| B2R761     | cDNA, FLJ9ε 5.66727605   | 3 | 3 | 3 | 59    | 7.05  | 46 | 3 |
| 000488     | Zinc fingerε 33.5820896  | 2 | 2 | 2 | 15.2  | 9.82  | 0  | 2 |
| A3KMH1     | von Willebrε 1.67979003  | 2 | 2 | 2 | 214.7 | 7.4   | 38 | 2 |
| Q9NY27     | Serine/threε 6.7146283   | 2 | 2 | 2 | 46.9  | 4.54  | 40 | 2 |
| Q5VTL8     | Pre-mRNA-si 4.57875458   | 2 | 3 | 2 | 64.4  | 10.54 | 57 | 2 |
| Q8IYS1     | Peptidase 18.48623853    | 2 | 2 | 2 | 47.7  | 5.85  | 0  | 2 |
| Q7Z2K6     | Endoplasmicε 2.98672566  | 2 | 2 | 2 | 100.2 | 7.52  | 54 | 2 |
| A0A024R233 | Tight junctε 2.43697479  | 2 | 2 | 2 | 133.9 | 7.4   | 55 | 2 |
| Q8TCJ2     | Dolichyl-di 4.47941889   | 3 | 3 | 3 | 93.6  | 8.91  | 42 | 3 |
| A4D1E9     | GTP-bindingε 9.56072351  | 2 | 2 | 2 | 42.9  | 9.03  | 0  | 2 |
| Q9Y3D6     | Mitochondriε 15.7894737  | 2 | 3 | 2 | 16.9  | 8.79  | 55 | 2 |
| Q2L6I0     | FB19 proteiε 3.61702128  | 2 | 2 | 2 | 99    | 9.17  | 0  | 2 |
| A8K761     | NADH dehydε 12.2093023   | 2 | 2 | 2 | 20.8  | 8.48  | 38 | 2 |
| B2R9T9     | cDNA, FLJ9ε 4.52674897   | 1 | 2 | 1 | 26.2  | 10.67 | 34 | 1 |
| B2R5Y4     | cDNA, FLJ9ε 5.02692998   | 3 | 3 | 3 | 65.6  | 6.64  | 37 | 3 |
| 000291     | Huntingtin- 2.21793635   | 2 | 3 | 1 | 116.1 | 5.3   | 63 | 2 |
| Q59FP5     | Spectrin, fl. 67238422   | 4 | 4 | 1 | 268.1 | 5.36  | 39 | 4 |
| P52298     | Nuclear cap 14.1025641   | 2 | 2 | 2 | 18    | 8.21  | 39 | 2 |
| Q14146     | Unhealthy r1.31233596    | 2 | 2 | 2 | 170.4 | 7.31  | 44 | 2 |
| 075569     | Interferon-ε 6.07028754  | 1 | 1 | 1 | 34.4  | 8.41  | 53 | 1 |
| P08651     | Nuclear facε 9.05511811  | 2 | 2 | 2 | 55.6  | 8.38  | 0  | 2 |
| P46734     | Dual speciε 18.06916427  | 2 | 2 | 2 | 39.3  | 7.43  | 26 | 2 |
| Q96EL3     | 39S ribosomε 31.25       | 2 | 2 | 2 | 12.1  | 8.76  | 49 | 2 |
| Q9Y2R4     | Probable A1ε 4.34056761  | 2 | 2 | 2 | 67.5  | 9.67  | 65 | 2 |
| P11182     | Lipoamide ε 4.97925311   | 2 | 2 | 2 | 53.5  | 8.51  | 43 | 2 |
| Q7Z4H3     | HD domain-ε 16.6666667   | 3 | 3 | 3 | 23.4  | 5.49  | 47 | 3 |

|            |                          |              |   |   |   |       |       |    |   |
|------------|--------------------------|--------------|---|---|---|-------|-------|----|---|
| Q8VWJ2     | NudC domain              | 12.7388535   | 2 | 2 | 2 | 17.7  | 5.07  | 73 | 2 |
| Q5JSZ5     | Protein PRF1             | 6.1507402    | 3 | 4 | 3 | 242.8 | 8.34  | 39 | 3 |
| AOA087WZKO | Deoxyhypusine            | 11.0810811   | 2 | 2 | 2 | 41.1  | 5.47  | 37 | 2 |
| O14907     | Tax1-binding             | 13.7096774   | 1 | 1 | 1 | 13.7  | 8.48  | 71 | 1 |
| Q9H1A4     | Anaphase-p1              | 2.16049383   | 2 | 2 | 2 | 216.4 | 6.3   | 0  | 2 |
| Q9Y2P8     | RNA 3'-terminal          | 4.28954424   | 1 | 1 | 1 | 40.8  | 9.26  | 57 | 1 |
| F5GYQ1     | V-type protein           | 7.65306122   | 2 | 2 | 2 | 44.6  | 5.14  | 53 | 2 |
| AOA087XOW9 | OTU domain               | 4.0247678    | 1 | 1 | 1 | 37.3  | 6.74  | 87 | 1 |
| O15173     | Membrane-associated      | 17.4887892   | 2 | 3 | 2 | 23.8  | 4.88  | 47 | 2 |
| O75381     | Peroxisomal              | 16.63129973  | 1 | 1 | 1 | 41.2  | 4.94  | 37 | 1 |
| Q9GZP9     | Derlin-2                 | 0512.5523013 | 1 | 1 | 1 | 27.5  | 7.28  | 0  | 1 |
| AOA0AOMT83 | Isovaleryl-              | 6.10328638   | 3 | 3 | 3 | 46.6  | 8.05  | 40 | 3 |
| Q13601     | KRR1 small               | 11.5485564   | 3 | 3 | 3 | 43.6  | 9.77  | 35 | 3 |
| Q9UPT9     | Ubiquitin                | 7.80952381   | 2 | 3 | 2 | 59.9  | 8.05  | 33 | 2 |
| Q9P2B2     | Prostaglandin            | 3.29920364   | 2 | 2 | 2 | 98.5  | 6.61  | 0  | 2 |
| B4DKA9     | cDNA FLJ611              | 2.47349823   | 2 | 2 | 1 | 97.4  | 4.94  | 46 | 2 |
| Q7Z422     | SUZ domain               | 13.8157895   | 1 | 1 | 1 | 17    | 8.95  | 43 | 1 |
| Q9NR50     | Translation              | 6.85840708   | 2 | 2 | 2 | 50.2  | 6.47  | 44 | 2 |
| P82921     | 28S ribosome             | 21.8390805   | 2 | 2 | 2 | 10.7  | 10.21 | 51 | 2 |
| Q14562     | ATP-dependent            | 0.81967213   | 1 | 2 | 1 | 139.2 | 8.32  | 74 | 1 |
| AOA0S2Z556 | Polyglutamine            | 12.0996441   | 2 | 2 | 2 | 32.2  | 6.34  | 0  | 2 |
| Q8WVCO     | RNA polymer              | 3.15315315   | 2 | 2 | 2 | 75.4  | 4.51  | 90 | 2 |
| AOA024QYW3 | Proteolipic              | 18.4210526   | 2 | 2 | 2 | 16.7  | 7.24  | 52 | 2 |
| B2R8X4     | cDNA, FLJ9               | 5.72687225   | 1 | 1 | 1 | 51.2  | 4.97  | 0  | 1 |
| O15031     | Plexin-B2                | (1.52339499  | 2 | 2 | 2 | 205   | 6.24  | 70 | 2 |
| P42345     | Serine/threonine         | 1.2161632    | 2 | 2 | 2 | 288.7 | 7.17  | 26 | 2 |
| AOA0C4DGV4 | Hepatitis F              | 11.5606936   | 1 | 1 | 1 | 18.1  | 5.5   | 0  | 1 |
| AOA024R473 | Mitochondrial            | 9.03614458   | 2 | 2 | 2 | 37.5  | 8.4   | 31 | 2 |
| Q86U90     | YrdC domain              | 7.16845878   | 1 | 1 | 1 | 29.3  | 8.57  | 40 | 1 |
| H7BYT1     | Casein kinase            | 3.27868852   | 1 | 1 | 1 | 49    | 9.94  | 69 | 1 |
| Q92552     | 28S ribosome             | 5.31400966   | 2 | 3 | 2 | 47.6  | 6.18  | 48 | 2 |
| O15269     | Serine palmitoyl         | 2.95983087   | 1 | 1 | 1 | 52.7  | 6.01  | 80 | 1 |
| Q53EY9     | F-box only               | 8.43672457   | 2 | 2 | 2 | 44.5  | 7.03  | 50 | 2 |
| AOA0S2Z5C9 | Putative tRNA            | 4.74777448   | 1 | 1 | 1 | 36.9  | 6.3   | 71 | 1 |
| Q13643     | Four and a half          | 6.42857143   | 2 | 2 | 2 | 31.2  | 6.2   | 37 | 2 |
| Q5T5H1     | Alpha-endonuclease       | 15.5080214   | 2 | 2 | 2 | 21    | 7.87  | 50 | 2 |
| B2R9D9     | cDNA, FLJ9               | 5.08474576   | 1 | 1 | 1 | 38.5  | 7.21  | 54 | 1 |
| A6NGJ0     | Dynein light             | 28.9473684   | 2 | 6 | 2 | 17    | 5.92  | 33 | 2 |
| Q70J99     | Protein unc-2            | 3.3853211    | 2 | 2 | 2 | 123.2 | 6.65  | 63 | 2 |
| B3KP47     | cDNA FLJ311              | 15.9509202   | 2 | 2 | 2 | 19.6  | 9.86  | 15 | 2 |
| Q9H936     | Mitochondrial            | 5.88235294   | 2 | 2 | 2 | 34.4  | 9.29  | 36 | 2 |
| AOA087WWMO | Trafficking              | 12.2340426   | 2 | 2 | 2 | 21.2  | 5.06  | 62 | 2 |
| Q9UMX5     | Neudessin                | 058.72093023 | 1 | 1 | 1 | 18.8  | 5.69  | 35 | 1 |
| Q96FZ2     | Embryonic                | 9.3220339    | 3 | 3 | 3 | 40.5  | 8.15  | 74 | 3 |
| Q7L5D6     | Golgi to ER              | 3.97553517   | 1 | 1 | 1 | 36.5  | 5.41  | 55 | 1 |
| AOA024R7N7 | Interferon,              | 4.4          | 1 | 2 | 1 | 27.9  | 4.88  | 68 | 1 |
| Q92538     | Golgi-specific           | 2.42065627   | 4 | 5 | 3 | 206.3 | 5.73  | 74 | 4 |
| O95298     | NADH dehydrogenase       | 22.6890756   | 2 | 2 | 2 | 14.2  | 8.98  | 20 | 2 |
| Q9NXR7     | BRCA1-A core             | 7.83289817   | 2 | 2 | 2 | 43.5  | 5.81  | 37 | 2 |
| P59665     | Neutrophil               | 20.212766    | 2 | 2 | 2 | 10.2  | 6.99  | 62 | 2 |
| AOA024RCR2 | Guanine nucleotide       | 3.13014827   | 2 | 2 | 2 | 68.6  | 5.8   | 48 | 2 |
| Q9P0J0     | NADH dehydrogenase       | 16.6666667   | 2 | 2 | 2 | 16.7  | 8.43  | 37 | 2 |
| AOA0X1KG71 | Negative elongation      | 3.50318471   | 2 | 2 | 2 | 70    | 6.04  | 60 | 2 |
| B4DX69     | cDNA FLJ5510             | 6.6598985    | 1 | 1 | 1 | 21.8  | 8.57  | 0  | 1 |
| O75940     | Survival of motor neuron | 8.82352941   | 1 | 1 | 1 | 26.7  | 7.24  | 0  | 1 |
| P62837     | Ubiquitin-c              | 6.80272109   | 1 | 2 | 1 | 16.7  | 7.83  | 69 | 1 |
| AOA024RACO | Leucine zipper           | 2.41635688   | 2 | 2 | 2 | 120.2 | 8.63  | 87 | 2 |
| O43805     | Sjogren syndrome         | 11.7647059   | 1 | 1 | 1 | 13.6  | 5.38  | 48 | 1 |
| K7EJU9     | Bifunctional             | 4.81012658   | 2 | 2 | 2 | 45.3  | 9.57  | 68 | 2 |
| AOA0AOMTH9 | TATA-binding             | 1.67658194   | 2 | 2 | 2 | 206.8 | 6.52  | 43 | 2 |
| Q96DV4     | 39S ribosome             | 4.73684211   | 2 | 3 | 2 | 44.6  | 7.53  | 69 | 2 |
| A8K5D4     | Myelin protein           | 9.2936803    | 2 | 2 | 2 | 29.1  | 8.72  | 61 | 2 |
| Q8N806     | Putative E3              | 6.35294118   | 1 | 1 | 1 | 48    | 4.81  | 39 | 1 |
| Q15555     | Microtubule              | 11.0091743   | 2 | 2 | 2 | 37    | 5.57  | 0  | 2 |
| P36957     | Dihydrolipic             | 4.85651214   | 2 | 2 | 2 | 48.7  | 8.95  | 51 | 2 |
| Q9HCG8     | Pre-mRNA-splicing        | 1.65198238   | 1 | 2 | 1 | 105.4 | 7.03  | 35 | 1 |
| Q96EB6     | NAD-dependent            | 3.34672021   | 2 | 2 | 2 | 81.6  | 4.67  | 0  | 2 |
| Q9BUH6     | Protein PA15             | 5.88235294   | 1 | 1 | 1 | 21.6  | 5.48  | 71 | 1 |
| Q99797     | Mitochondrial            | 3.78681627   | 3 | 3 | 3 | 80.6  | 7.05  | 23 | 3 |
| P60604     | Ubiquitin-c              | 18.7878788   | 2 | 2 | 2 | 18.6  | 4.7   | 55 | 2 |
| B2R823     | cDNA, FLJ9               | 6.34920635   | 1 | 1 | 1 | 27.9  | 9.73  | 86 | 1 |
| Q9H2M9     | Rab3 GTPase              | 2.72792534   | 3 | 3 | 3 | 155.9 | 5.62  | 43 | 3 |
| AOA024R9V7 | Uncharacterized          | 2.84191829   | 1 | 1 | 1 | 60.7  | 4.68  | 59 | 1 |
| Q86Y79     | Probable peptidase       | 11.682243    | 1 | 1 | 1 | 22.9  | 10.56 | 36 | 1 |
| Q53G19     | Mitochondrial            | 3.5416667    | 2 | 2 | 2 | 20.6  | 9.91  | 58 | 2 |
| Q9UL25     | Ras-related              | 7.55555556   | 1 | 1 | 1 | 24.3  | 7.94  | 58 | 1 |
| A8MYK1     | 39S ribosome             | 7.85340314   | 1 | 1 | 1 | 21.8  | 11.62 | 65 | 1 |

|            |              |             |   |   |   |       |       |    |   |
|------------|--------------|-------------|---|---|---|-------|-------|----|---|
| AOA087X256 | WASH complex | 4.34412266  | 3 | 3 | 3 | 136.4 | 7.44  | 0  | 3 |
| Q92882     | Osteoclast   | 10.2803738  | 2 | 3 | 2 | 23.8  | 5.68  | 41 | 2 |
| Q15527     | Surfeit loc  | 9.765625    | 2 | 2 | 2 | 29.6  | 9.22  | 33 | 2 |
| Q969N2     | GPI transan  | 4.67128028  | 3 | 3 | 3 | 65.7  | 8.38  | 58 | 3 |
| O14777     | Kinetochore  | 4.20560748  | 2 | 2 | 2 | 73.9  | 5.6   | 26 | 2 |
| AOA024QYZO | Sec61 gamm   | 17.6470588  | 1 | 2 | 1 | 7.7   | 9.99  | 73 | 1 |
| F8VYN9     | ADP-ribosyl  | 7.21649485  | 1 | 1 | 1 | 21.8  | 6.77  | 43 | 1 |
| Q7Z4X2     | Neuronal pr  | 23.4177215  | 2 | 3 | 2 | 17.9  | 5.43  | 48 | 2 |
| Q9UN37     | Vacuolar pr  | 5.26315789  | 2 | 2 | 2 | 48.9  | 7.8   | 34 | 2 |
| O43760     | Synaptoogyri | 12.0535714  | 3 | 3 | 3 | 24.8  | 4.94  | 0  | 3 |
| Q59G98     | TIAL protei  | 4.52586207  | 2 | 2 | 1 | 51.3  | 7.83  | 82 | 2 |
| Q13610     | Periodic ti  | 2.99401198  | 1 | 2 | 1 | 55.8  | 4.77  | 16 | 1 |
| Q5VYS8     | Terminal ur  | 0.86956522  | 1 | 1 | 1 | 171.1 | 6.83  | 95 | 1 |
| Q92542     | Nicastrin    | (4.23131171 | 2 | 2 | 2 | 78.4  | 5.99  | 29 | 2 |
| Q9BTC0     | Death-induc  | 0.625       | 1 | 2 | 1 | 243.7 | 7.88  | 72 | 1 |
| AOA024QZW2 | Nucleolar p  | 12.8404669  | 3 | 3 | 3 | 29.4  | 9.67  | 39 | 3 |
| B2RE59     | cDNA, FLJ9   | 7.69230769  | 2 | 2 | 2 | 33.6  | 8.03  | 48 | 2 |
| Q8IV48     | 3'-5' exori  | 5.44412607  | 2 | 2 | 2 | 40    | 6.7   | 37 | 2 |
| Q9UBU9     | Nuclear RN   | 3.39256866  | 2 | 2 | 2 | 70.1  | 8.51  | 28 | 2 |
| Q96CW5     | Gamma-tubul  | 3.85887541  | 3 | 3 | 3 | 103.5 | 8.12  | 34 | 3 |
| Q9NRN7     | L-aminoadi   | 7.4433657   | 2 | 2 | 2 | 35.8  | 6.8   | 60 | 2 |
| Q9BQ70     | Transcripti  | 4.28994083  | 2 | 2 | 2 | 76.6  | 6.35  | 0  | 2 |
| P02749     | Beta-2-glyc  | 6.08695652  | 1 | 1 | 1 | 38.3  | 7.97  | 47 | 1 |
| AOA024R7I0 | GIPC PDZ do  | 3.6036036   | 1 | 1 | 1 | 36    | 6.28  | 60 | 1 |
| V9HW48     | SH3 domain   | 27.1929825  | 2 | 2 | 2 | 12.8  | 5.25  | 50 | 2 |
| Q8WTT2     | Nucleolar c  | 1.875       | 2 | 3 | 2 | 92.5  | 9.17  | 0  | 2 |
| B4E1N4     | cDNA FLJ61   | 63.74592834 | 2 | 2 | 2 | 70    | 10.37 | 44 | 2 |
| Q6DD87     | Zinc finger  | 7.04960836  | 2 | 2 | 2 | 40.5  | 7.84  | 0  | 2 |
| Q96B36     | Proline-ric  | 7.03125     | 1 | 1 | 1 | 27.4  | 4.75  | 50 | 1 |
| Q13427     | Peptidyl-pr  | 2.3872679   | 1 | 1 | 1 | 88.6  | 10.29 | 55 | 1 |
| F5H5P2     | Uncharacter  | 3.34029228  | 1 | 1 | 1 | 54.2  | 6.43  | 65 | 1 |
| P19387     | DNA-direct   | 6.90909091  | 1 | 1 | 1 | 31.4  | 4.92  | 33 | 1 |
| Q5T8I3     | Protein FAM  | 8.61111111  | 2 | 2 | 2 | 39.3  | 7.02  | 50 | 2 |
| AOA0AOMQR2 | Protein RTF  | 9.82142857  | 2 | 2 | 2 | 37.5  | 8.44  | 0  | 2 |
| O94903     | Proline syr  | 8.72727273  | 2 | 2 | 2 | 30.3  | 7.5   | 30 | 2 |
| Q5SY16     | Polynucleot  | 2.56410256  | 1 | 1 | 1 | 79.3  | 9.13  | 58 | 1 |
| A8K724     | cDNA FLJ76   | 2.36886633  | 1 | 2 | 1 | 63.9  | 9.79  | 77 | 1 |
| Q5T653     | 39S ribosom  | 4.59016393  | 1 | 1 | 1 | 33.3  | 11.3  | 43 | 1 |
| P82675     | 28S ribosom  | 5.34883721  | 3 | 3 | 2 | 48    | 9.92  | 52 | 3 |
| Q9NVU0     | DNA-direct   | 3.67231638  | 2 | 2 | 2 | 79.8  | 6.47  | 41 | 2 |
| G3XAN8     | Mitochondri  | 18.3673469  | 2 | 2 | 2 | 11.1  | 8.1   | 59 | 2 |
| P42126     | Enoyl-CoA c  | 4.96688742  | 1 | 1 | 1 | 32.8  | 8.54  | 53 | 1 |
| AOA087WWS1 | THO complex  | 2.28310502  | 1 | 1 | 1 | 75.6  | 4.98  | 56 | 1 |
| LOR6Q1     | SLC35A4 up   | 17.4757282  | 2 | 2 | 2 | 11.1  | 8.1   | 37 | 2 |
| Q8WUY1     | Protein THE  | 11.0576923  | 2 | 2 | 2 | 23.9  | 9.55  | 44 | 2 |
| B3KM74     | cDNA FLJ10   | 6.72243346  | 1 | 1 | 1 | 29.6  | 6.77  | 59 | 1 |
| P22059     | Oxysterol-t  | 2.35439901  | 2 | 2 | 2 | 89.4  | 7.3   | 70 | 2 |
| AOA0AOMRK6 | Metaxin 1,   | 3.00429185  | 1 | 1 | 1 | 51.4  | 9.79  | 52 | 1 |
| Q9NRX2     | 39S ribosom  | 13.7142857  | 2 | 2 | 2 | 20    | 10.11 | 50 | 2 |
| Q7KZN9     | Cytochrome   | 5.6097561   | 2 | 2 | 2 | 46    | 9.82  | 0  | 2 |
| P51784     | Ubiquitin c  | 1.97300104  | 2 | 2 | 1 | 109.7 | 5.45  | 32 | 2 |
| Q96QD8     | Sodium-cou   | 4.15019763  | 1 | 1 | 1 | 56    | 8     | 43 | 1 |
| AOA024RD11 | Protein phc  | 4.9833887   | 2 | 2 | 2 | 69.9  | 8.13  | 32 | 2 |
| AOA0U1RQMO | Uncharacter  | 27.5862069  | 2 | 2 | 2 | 12.7  | 10.24 | 38 | 2 |
| B3KP90     | cDNA FLJ31   | 5.21920668  | 3 | 4 | 2 | 52.7  | 5.05  | 84 | 3 |
| A8K5R6     | Golgi SNAP   | 5.2         | 1 | 1 | 1 | 28.6  | 9.42  | 68 | 1 |
| Q13217     | DnaJ homol   | 5.95238095  | 2 | 2 | 2 | 57.5  | 6.15  | 51 | 2 |
| B3KM47     | cDNA FLJ10   | 1.7         | 2 | 2 | 2 | 111   | 5.45  | 37 | 2 |
| P11717     | Cation-ind   | 1.60578081  | 3 | 3 | 3 | 274.2 | 5.94  | 25 | 3 |
| O00566     | U3 small nt  | 2.64317181  | 1 | 1 | 1 | 78.8  | 4.86  | 17 | 1 |
| A6NIH7     | Protein unc  | 7.96812749  | 1 | 1 | 1 | 28.1  | 5.68  | 0  | 1 |
| Q96Q11     | CCA tRNA nt  | 6.4516129   | 2 | 2 | 2 | 50.1  | 8.1   | 27 | 2 |
| AOA0AOMQX8 | Muscleblinc  | 10.5        | 3 | 3 | 2 | 43    | 8.82  | 30 | 3 |
| V9HWI4     | Epididymis   | 4.36619718  | 1 | 1 | 1 | 78.1  | 8.12  | 0  | 1 |
| AOA024R9M9 | Calcium bir  | 12.3076923  | 2 | 2 | 2 | 22.4  | 5.1   | 29 | 2 |
| Q9BUL9     | Ribonucleas  | 17.0854271  | 3 | 3 | 3 | 20.6  | 9.61  | 49 | 3 |
| Q9NUQ6     | SPATS2-like  | 2.15053763  | 1 | 2 | 1 | 61.7  | 9.64  | 36 | 1 |
| Q9Y4B6     | Protein VPI  | 1.79163902  | 2 | 2 | 2 | 168.9 | 5.06  | 58 | 2 |
| Q9BW72     | HIG1 domair  | 25.4716981  | 1 | 1 | 1 | 11.5  | 10.2  | 41 | 1 |
| Q8IY37     | Probable A1  | 2.16076059  | 2 | 2 | 2 | 129.5 | 8.1   | 37 | 2 |
| P60602     | Reactive o   | 21.5189873  | 1 | 1 | 1 | 8.2   | 9.33  | 55 | 1 |
| Q53RG0     | Eukaryotic   | 11.0204082  | 2 | 2 | 2 | 28.3  | 8.88  | 54 | 2 |
| Q96S66     | Chloride cl  | 5.26315789  | 3 | 3 | 2 | 62    | 5.55  | 49 | 3 |
| B4DY17     | Methylthio   | 5.40540541  | 1 | 1 | 1 | 29.2  | 8.15  | 59 | 1 |
| O14618     | Copper cha   | 8.02919708  | 2 | 2 | 2 | 29    | 5.58  | 36 | 2 |
| Q9NX47     | E3 ubiquiti  | 7.1942446   | 2 | 2 | 2 | 31.2  | 8.7   | 39 | 2 |
| Q13228     | Selenium-bi  | 4.66101695  | 1 | 1 | 1 | 52.4  | 6.37  | 46 | 1 |



|            |              |              |   |   |   |       |       |    |   |
|------------|--------------|--------------|---|---|---|-------|-------|----|---|
| Q8TC07     | TBC1 domain  | 3.90738061   | 2 | 2 | 1 | 79.4  | 5.67  | 76 | 2 |
| P32929     | Cystathionin | 5.43209877   | 2 | 2 | 2 | 44.5  | 6.7   | 0  | 2 |
| Q9P1F3     | Costars fan  | 19.7530864   | 1 | 1 | 1 | 9.1   | 6.29  | 56 | 1 |
| D7RF68     | AGTRAP-BRAI  | 5.360134     | 2 | 2 | 2 | 66.2  | 8.9   | 54 | 2 |
| Q9NRF8     | CTP synthas  | 3.58361775   | 1 | 1 | 1 | 65.6  | 6.9   | 0  | 1 |
| B2R680     | Signal trar  | 2.24321133   | 2 | 2 | 2 | 94.1  | 6.23  | 30 | 2 |
| Q03468     | DNA excisic  | 0.93770931   | 1 | 1 | 1 | 168.3 | 8.09  | 67 | 1 |
| Q658Y4     | Protein FAM  | 4.65393795   | 2 | 2 | 2 | 93.9  | 6.39  | 0  | 2 |
| Q9NPD8     | Ubiquitin-c  | 11.6751269   | 2 | 2 | 2 | 22.5  | 7.99  | 0  | 2 |
| S4R3E2     | DnaJ homol   | 8.33333333   | 2 | 2 | 2 | 26.6  | 5.73  | 56 | 2 |
| P07203     | Glutathione  | 8.86699507   | 1 | 1 | 1 | 22.1  | 6.55  | 44 | 1 |
| AOA0A6YYH1 | Protein Cl   | 5.58375635   | 2 | 2 | 2 | 43.9  | 5.3   | 37 | 2 |
| O75208     | Ubiquinone   | 5.66037736   | 1 | 2 | 1 | 35.5  | 5.94  | 35 | 1 |
| Q5D862     | Filaggrin-2  | 2.71852781   | 2 | 2 | 2 | 247.9 | 8.31  | 40 | 2 |
| Q92614     | Unconventic  | 0.68159688   | 1 | 1 | 1 | 233   | 6.3   | 52 | 1 |
| Q86TI2     | Dipeptidyl   | 1.96987254   | 2 | 2 | 2 | 98.2  | 6.46  | 42 | 2 |
| P11055     | Myosin-3 O   | 1.08247423   | 2 | 5 | 1 | 223.8 | 5.81  | 46 | 2 |
| F8VX04     | Sodium-cou   | 1.98807157   | 1 | 1 | 1 | 56.2  | 7.69  | 35 | 1 |
| P00374     | Dihydrofol   | 8.55614973   | 1 | 1 | 1 | 21.4  | 7.42  | 44 | 1 |
| Q8TCT9     | Minor hist   | 6.36604775   | 1 | 1 | 1 | 41.5  | 6.43  | 0  | 1 |
| Q9NP77     | RNA polymer  | 8.7628866    | 1 | 1 | 1 | 22.6  | 5.33  | 35 | 1 |
| Q8WWI5     | Choline tr   | 4.41400304   | 2 | 2 | 2 | 73.3  | 8.6   | 0  | 2 |
| Q9Y2X9     | Zinc finger  | 1.56424581   | 1 | 1 | 1 | 96.9  | 8.48  | 70 | 1 |
| Q69YH5     | Cell divisi  | 1.56402737   | 1 | 1 | 1 | 112.6 | 8.4   | 71 | 1 |
| P01042     | Kininogen    | -13.88198758 | 2 | 2 | 2 | 71.9  | 6.81  | 37 | 2 |
| P16219     | Short-chair  | 3.15533981   | 1 | 1 | 1 | 44.3  | 7.99  | 55 | 1 |
| P50851     | Lipopolysa   | 0.55885435   | 1 | 1 | 1 | 318.9 | 5.6   | 63 | 1 |
| E7ESA6     | Focal adhes  | 1.55109489   | 1 | 1 | 1 | 124   | 6.62  | 51 | 1 |
| P08047     | Transcripti  | 1.40127389   | 1 | 2 | 1 | 80.6  | 7.34  | 0  | 1 |
| Q9H501     | ESF1 homol   | 3.29024677   | 2 | 2 | 2 | 98.7  | 5.11  | 40 | 2 |
| P13984     | General tr   | 8.03212851   | 1 | 1 | 1 | 28.4  | 9.23  | 42 | 1 |
| Q9Y5U2     | Protein TS   | 6.38297872   | 2 | 2 | 2 | 34.3  | 5.19  | 28 | 2 |
| Q12846     | Syntaxin-4   | 6.06060606   | 2 | 3 | 2 | 34.2  | 6.28  | 0  | 2 |
| Q6FIB4     | F11 recept   | 12.3745819   | 2 | 2 | 2 | 32.6  | 7.9   | 0  | 2 |
| B2R4G1     | cDNA, FLJ    | 912.3548387  | 1 | 1 | 1 | 10.1  | 9.52  | 0  | 1 |
| Q10589     | Bone marrow  | 10           | 2 | 2 | 2 | 19.8  | 5.6   | 41 | 2 |
| Q9UBD5     | Origin rec   | 3.79746835   | 2 | 2 | 2 | 82.2  | 7.61  | 36 | 2 |
| P29034     | Protein SI   | (10.2040816  | 1 | 2 | 1 | 11.1  | 4.78  | 48 | 1 |
| J3KPZ4     | Nuclear nuc  | 10           | 2 | 3 | 2 | 20.1  | 8.06  | 40 | 2 |
| P33552     | Cyclin-dep   | 20.2531646   | 1 | 1 | 1 | 9.9   | 8.46  | 0  | 1 |
| Q9NXF1     | Testis-exp   | 3.01399354   | 2 | 2 | 2 | 105.6 | 9.36  | 0  | 2 |
| Q96RN5     | Mediator o   | 12.28426396  | 1 | 1 | 1 | 86.7  | 9.42  | 57 | 1 |
| Q8TED1     | Probable g   | 111.0047847  | 2 | 2 | 2 | 23.9  | 9.35  | 27 | 2 |
| Q9Y315     | Deoxyribo    | 3.77358491   | 1 | 1 | 1 | 35.2  | 8.94  | 54 | 1 |
| O43709     | Probable I   | 5.69395018   | 1 | 1 | 1 | 31.9  | 8.73  | 44 | 1 |
| Q9UKV8     | Protein ar   | 2.56111758   | 2 | 2 | 2 | 97.1  | 9.19  | 45 | 2 |
| D3DPK5     | SH3 domain   | 11.2840467   | 2 | 3 | 2 | 26.8  | 8.38  | 45 | 2 |
| O95470     | Sphingosin   | 2.64084507   | 1 | 1 | 1 | 63.5  | 9.16  | 60 | 1 |
| Q5U5X0     | Complex III  | 17.3076923   | 1 | 1 | 1 | 11.9  | 9.66  | 40 | 1 |
| Q59EK0     | Epsilon isc  | 5.38922156   | 2 | 2 | 2 | 57.9  | 8.24  | 31 | 2 |
| Q12962     | Transcripti  | 11.4678899   | 1 | 1 | 1 | 21.7  | 6.57  | 68 | 1 |
| Q8TB52     | F-box only   | 1.87919463   | 1 | 1 | 1 | 82.3  | 5.4   | 71 | 1 |
| Q9NYP9     | Protein Mi   | 9.87124464   | 1 | 1 | 1 | 25.8  | 5.2   | 0  | 1 |
| B2RCO6     | cDNA, FLJ    | 919.01162791 | 2 | 2 | 2 | 39.3  | 9.36  | 45 | 2 |
| Q9Y6G9     | Cytoplasmic  | 6.8833652    | 2 | 2 | 2 | 56.5  | 6.42  | 60 | 2 |
| Q13421     | Mesothelin   | 2.22222222   | 1 | 1 | 1 | 68.9  | 6.38  | 0  | 1 |
| B2RDG1     | Fatty acyl   | -2.52427184  | 1 | 1 | 1 | 59.3  | 9.17  | 56 | 1 |
| Q9BTE1     | Dynactin s   | 13.1868132   | 1 | 1 | 1 | 20.1  | 8.02  | 0  | 1 |
| B2R642     | cDNA, FLJ    | 916.96594427 | 2 | 2 | 2 | 71.6  | 5.76  | 0  | 2 |
| P62891     | 60S riboso   | 23.5294118   | 2 | 3 | 2 | 6.4   | 12.56 | 0  | 2 |
| B2RCJ6     | cDNA, FLJ    | 913.3496732  | 3 | 3 | 3 | 136.7 | 6.92  | 0  | 3 |
| Q9UNF1     | Melanoma-a   | 8.41584158   | 3 | 3 | 3 | 64.9  | 9.32  | 34 | 3 |
| B2R9Y2     | cDNA, FLJ    | 912.50896057 | 1 | 1 | 1 | 66.3  | 8.97  | 61 | 1 |
| Q9Y6A5     | Transformi   | 2.14797136   | 1 | 1 | 1 | 90.3  | 5.05  | 44 | 1 |
| AOA087WTI3 | NADH dehyd   | 9.81308411   | 2 | 2 | 2 | 23.7  | 11.74 | 21 | 2 |
| AOA0S2Z5U7 | Diablo-like  | 7.94979079   | 2 | 2 | 2 | 27.1  | 5.9   | 23 | 2 |
| P29083     | General tr   | 4.10022779   | 1 | 1 | 1 | 49.4  | 4.82  | 0  | 1 |
| Q5T447     | E3 ubiquiti  | 1.8583043    | 1 | 1 | 1 | 97.1  | 5.64  | 51 | 1 |
| P17050     | Alpha-N-acc  | 2.67639903   | 1 | 1 | 1 | 46.5  | 5.19  | 62 | 1 |
| P78362     | SRSF protei  | 3.19767442   | 2 | 2 | 1 | 77.5  | 4.97  | 43 | 2 |
| Q13740     | CD166 anti   | 2.74442539   | 1 | 1 | 1 | 65.1  | 6.25  | 0  | 1 |
| B3KM43     | cDNA FLJ     | 1013.7037037 | 1 | 1 | 1 | 68.8  | 6.13  | 0  | 1 |
| C9J5N1     | PTGES3L-AA   | 6.06060606   | 2 | 2 | 2 | 55    | 6.55  | 0  | 2 |
| Q06787     | Synaptic f   | 2.68987342   | 2 | 2 | 1 | 71.1  | 7.42  | 47 | 2 |
| Q96I25     | Splicing f   | 7.2319202    | 3 | 3 | 2 | 44.9  | 5.97  | 51 | 3 |
| Q9NYB0     | Telomeric    | 17.26817043  | 1 | 1 | 1 | 44.2  | 4.73  | 0  | 1 |
| O43719     | HIV Tat-sp   | 4.37086093   | 2 | 2 | 2 | 85.8  | 4.4   | 16 | 2 |

|            |                                         |   |   |   |       |       |    |   |
|------------|-----------------------------------------|---|---|---|-------|-------|----|---|
| Q16775     | Hydroxyacyl3.57142857                   | 1 | 1 | 1 | 33.8  | 8.12  | 57 | 1 |
| B2R5T2     | cDNA, FLJ925.46875                      | 2 | 2 | 2 | 56.1  | 7.25  | 0  | 2 |
| Q53HJ8     | PKCI-1-related9.81595092                | 1 | 1 | 1 | 17.2  | 9.48  | 47 | 1 |
| Q15018     | BRISC complex2.65060241                 | 1 | 1 | 1 | 46.9  | 6.21  | 76 | 1 |
| Q96H20     | Vacuolar space5.42635659                | 1 | 1 | 1 | 28.8  | 6.65  | 43 | 1 |
| AOA140VKG4 | Testis tissue4.95049505                 | 2 | 2 | 2 | 55.4  | 4.88  | 26 | 2 |
| Q9NZ63     | Uncharacterized7.95847751               | 2 | 2 | 2 | 33.7  | 6.74  | 0  | 2 |
| Q99707     | Methionine 1.58102767                   | 1 | 1 | 1 | 140.4 | 5.58  | 49 | 1 |
| Q9UII2     | ATPase inhibitor16.9811321              | 2 | 3 | 2 | 12.2  | 9.35  | 46 | 2 |
| Q9UK61     | Protein TASC1.31736527                  | 2 | 2 | 2 | 188.9 | 5.8   | 69 | 2 |
| Q8WXF1     | Paraspeckle3.05927342                   | 1 | 1 | 1 | 58.7  | 6.67  | 0  | 1 |
| O00401     | Neural Wisk4.55445545                   | 2 | 2 | 2 | 54.8  | 7.93  | 0  | 2 |
| Q9H967     | WD repeat-containing3.514377            | 2 | 3 | 2 | 69.7  | 9.25  | 52 | 2 |
| Q9Y4C8     | Probable RRM1.77083333                  | 2 | 2 | 2 | 107.3 | 6.54  | 49 | 2 |
| AOA075B6G3 | Dystrophin 0.75983718                   | 3 | 3 | 2 | 426.5 | 5.9   | 37 | 3 |
| O43148     | mRNA cap protein5.46218487              | 2 | 2 | 2 | 54.8  | 6.61  | 22 | 2 |
| AOA024R3A2 | DCN1-like protein8.01687764             | 2 | 2 | 2 | 27.5  | 5.58  | 36 | 2 |
| E7EPT4     | NADH dehydrogenase7.93650794            | 1 | 1 | 1 | 27.9  | 8     | 0  | 1 |
| Q59HH7     | X-ray repair protein2.9366306           | 1 | 1 | 1 | 71    | 6.04  | 19 | 1 |
| Q9BVG8     | Kinesin-like3.60144058                  | 2 | 2 | 2 | 92.7  | 7.69  | 44 | 2 |
| B2RBM8     | cDNA, FLJ925.7168784                    | 3 | 3 | 3 | 123.5 | 7.42  | 21 | 3 |
| Q13144     | Translocator4.29958391                  | 2 | 2 | 2 | 80.3  | 5.08  | 33 | 2 |
| Q68E01     | Integrator 1.91754554                   | 1 | 1 | 1 | 118   | 5.8   | 0  | 1 |
| AOA024R2K4 | Leucine rich3.77358491                  | 2 | 2 | 2 | 84.1  | 6.98  | 36 | 2 |
| Q86V21     | Acetoacetylase4.01785714                | 3 | 3 | 3 | 75.1  | 6.24  | 57 | 3 |
| Q5SWX8     | Protein oxidase4.40528634               | 1 | 1 | 1 | 51.1  | 5.92  | 0  | 1 |
| Q9UPP1     | Histone lysine1.79245283                | 1 | 1 | 1 | 117.8 | 8.72  | 0  | 1 |
| P06280     | Alpha-galactosidase4.1958042            | 1 | 1 | 1 | 48.7  | 5.6   | 56 | 1 |
| AOA024R2T0 | Ubiquitin epsilon2.80373832             | 2 | 2 | 1 | 108.5 | 5.71  | 32 | 2 |
| Q2M1J6     | Oxidase (Cytochrome)5.64516129          | 3 | 3 | 3 | 55.3  | 9.69  | 44 | 3 |
| AOA140VK84 | Fructosaminidase6.14886731              | 2 | 2 | 2 | 34.4  | 7.33  | 16 | 2 |
| Q6IBU4     | SDF2 protein7.10900474                  | 1 | 1 | 1 | 23    | 7.33  | 44 | 1 |
| Q96MX6     | WD repeat-containing4.48179272          | 1 | 1 | 1 | 39.7  | 8.09  | 0  | 1 |
| Q5SNT2     | Transmembrane protein1.5015015          | 1 | 1 | 1 | 72.2  | 9.22  | 50 | 1 |
| Q6NXE6     | Armadillo protein2.79441118             | 1 | 1 | 1 | 54.1  | 6.24  | 71 | 1 |
| Q14807     | Kinesin-like2.70676692                  | 1 | 1 | 1 | 73.2  | 9.45  | 47 | 1 |
| A4D1P0     | Uncharacterized4.4198895                | 2 | 2 | 1 | 41.9  | 7.01  | 38 | 2 |
| Q9UGP4     | LIM domain-2.36686391                   | 1 | 1 | 1 | 72.1  | 6.65  | 41 | 1 |
| O95551     | Tyrosyl-DNA phosphodiesterase5.24861878 | 1 | 1 | 1 | 40.9  | 5.1   | 38 | 1 |
| Q14139     | Ubiquitin chain1.59474672               | 1 | 1 | 1 | 122.5 | 5.24  | 0  | 1 |
| Q96A35     | 39S ribosome6.01851852                  | 1 | 1 | 1 | 24.9  | 9.29  | 58 | 1 |
| Q9UQN3     | Charged multimer8.92018779              | 2 | 2 | 2 | 23.9  | 8.76  | 30 | 2 |
| Q68CQ4     | Digestive complex2.77777778             | 2 | 2 | 2 | 87    | 5.88  | 46 | 2 |
| AOA024R7X7 | Staufen, RRM3.85964912                  | 2 | 2 | 2 | 62.6  | 9.61  | 49 | 2 |
| Q9Y606     | tRNA pseudouridine2.81030445            | 1 | 1 | 1 | 47.4  | 8.41  | 55 | 1 |
| P50135     | Histamine N-methyltransferase5.1369863  | 1 | 1 | 1 | 33.3  | 5.34  | 52 | 1 |
| Q15006     | ER membrane protein4.04040404           | 1 | 1 | 1 | 34.8  | 6.57  | 56 | 1 |
| C9JEH3     | Angio-association4.13793103             | 1 | 1 | 1 | 46.8  | 4.42  | 0  | 1 |
| O00186     | Syntaxin-binding1.68918919              | 1 | 1 | 1 | 67.7  | 7.8   | 82 | 1 |
| H3BQJ5     | Nucleolar protein9.25925926             | 1 | 1 | 1 | 23.8  | 11.56 | 0  | 1 |
| J3KR35     | Coiled-coil protein11.1731844           | 2 | 2 | 2 | 20.5  | 8.47  | 44 | 2 |
| AOA0D9SF58 | Chromosome 1.09797297                   | 1 | 2 | 1 | 129.3 | 9.41  | 40 | 1 |
| AOA087X188 | Bridging integrin3.18257956             | 2 | 2 | 1 | 65    | 5.38  | 29 | 2 |
| LOR6S1     | Alternative splicing10.1851852          | 2 | 2 | 1 | 11.5  | 8.48  | 38 | 2 |
| Q08AF3     | Schlafen family2.24466891               | 1 | 1 | 1 | 101   | 8.22  | 0  | 1 |
| A8K410     | cDNA FLJ7822.41935484                   | 1 | 1 | 1 | 54.6  | 5.08  | 41 | 1 |
| AOA1B0GVF3 | Carnitine (6S)-transferase6.11940299    | 2 | 2 | 2 | 75.2  | 8.5   | 0  | 2 |
| P40123     | Adenylyl cyclase3.35429769              | 2 | 2 | 1 | 52.8  | 6.37  | 51 | 2 |
| Q96FX7     | tRNA (adenine)5.88235294                | 1 | 1 | 1 | 31.4  | 7.36  | 0  | 1 |
| AOA024R0Q5 | Protein phosphatase2.77777778           | 1 | 1 | 1 | 89    | 6.81  | 0  | 1 |
| Q5VV89     | Microsomal protein14.4578313            | 1 | 3 | 1 | 18.4  | 9.96  | 0  | 1 |
| AOAOC4DFN1 | Mitofusin-2.15924426                    | 2 | 2 | 2 | 84.1  | 6.33  | 43 | 2 |
| Q96GC5     | 39S ribosome6.13207547                  | 1 | 1 | 1 | 23.9  | 8.98  | 50 | 1 |
| Q9HD42     | Charged multimer8.67346939              | 2 | 2 | 2 | 21.7  | 8.06  | 60 | 2 |
| Q7Z7F0     | UPF0469 protein2.11726384               | 1 | 1 | 1 | 64.8  | 8.73  | 59 | 1 |
| V9GYM3     | Apolipoprotein16.5413534                | 2 | 2 | 2 | 14.9  | 8.27  | 41 | 2 |
| J9JIE6     | Calcium loci9.20502092                  | 2 | 2 | 2 | 27.1  | 10.26 | 0  | 2 |
| Q658N3     | Down-regulation7.95454545               | 1 | 1 | 1 | 19.4  | 4.75  | 55 | 1 |
| B8ZZ98     | U4/U6.U5 small nuclear RNA2.0253165     | 1 | 1 | 1 | 19.4  | 11.46 | 0  | 1 |
| Q9UNS1     | Protein tyrosine2.48344371              | 2 | 2 | 2 | 138.6 | 5.4   | 0  | 2 |
| B2R9K5     | cDNA, FLJ925.26640927                   | 1 | 1 | 1 | 29.9  | 10.17 | 0  | 1 |
| P40306     | Proteasome 4.02930403                   | 1 | 2 | 1 | 28.9  | 7.81  | 48 | 1 |
| Q16740     | ATP-dependent protein16.2454874         | 2 | 2 | 2 | 30.2  | 8.09  | 0  | 2 |
| Q7Z7L1     | Schlafen family2.21975583               | 2 | 2 | 1 | 102.8 | 7.77  | 29 | 2 |
| Q9NQZ5     | STAR-related2.97297297                  | 1 | 1 | 1 | 43.1  | 8.95  | 58 | 1 |
| Q96NCO     | Zinc finger5.52763819                   | 1 | 1 | 1 | 23.6  | 9.01  | 15 | 1 |
| Q9NWY4     | Histone PAF4.04624277                   | 1 | 1 | 1 | 39.4  | 6.8   | 14 | 1 |

|            |                       |   |   |   |       |      |    |   |
|------------|-----------------------|---|---|---|-------|------|----|---|
| 094905     | Erlin-2 OS=5.60471976 | 2 | 2 | 1 | 37.8  | 5.62 | 36 | 2 |
| Q9BYD6     | 39S ribosom3.69230769 | 1 | 1 | 1 | 36.9  | 8.78 | 0  | 1 |
| Q9NPJ3     | Acyl-coenz9.28571429  | 1 | 1 | 1 | 15    | 9.14 | 31 | 1 |
| AOA024RCN9 | Euchromatic3.30578512 | 2 | 2 | 2 | 132.3 | 5.45 | 0  | 2 |
| 043715     | TP53-regul22.3684211  | 1 | 1 | 1 | 8.8   | 5.48 | 0  | 1 |
| P36639     | 7,8-dihydro7.6142132  | 1 | 1 | 1 | 22.5  | 5.27 | 46 | 1 |
| P51151     | Ras-relatec5.47263682 | 1 | 1 | 1 | 22.8  | 5.47 | 46 | 1 |
| AOA024RB62 | tRNA (guani4.9833887  | 1 | 1 | 1 | 34.1  | 7.9  | 63 | 1 |
| K7EMT4     | Uncharacter13.6094675 | 1 | 1 | 1 | 17.3  | 8.19 | 0  | 1 |
| Q8NEF9     | Serum resp5.36130536  | 2 | 2 | 2 | 48.6  | 9.58 | 0  | 2 |
| HOYFB5     | Anaphase-p16.06060606 | 2 | 2 | 1 | 44.1  | 8.18 | 40 | 2 |
| Q96J02     | E3 ubiquiti0.99667774 | 1 | 1 | 1 | 102.7 | 6.3  | 37 | 1 |
| AOA024RDG6 | Scavenger 12.51046025 | 1 | 1 | 1 | 54.3  | 5.14 | 64 | 1 |
| Q5JRX3     | Presequenc3.85728062  | 2 | 2 | 2 | 117.3 | 6.92 | 33 | 2 |
| Q53ET9     | Ariadne hor6.49087221 | 2 | 2 | 2 | 57.8  | 5.63 | 34 | 2 |
| 095487     | Protein tra1.02523659 | 1 | 1 | 1 | 137.3 | 6.67 | 59 | 1 |
| 095867     | Lymphocyte 12.8       | 1 | 1 | 1 | 13.8  | 8.15 | 0  | 1 |
| Q92643     | GPI-anchor 5.3164557  | 2 | 2 | 2 | 45.2  | 6.16 | 49 | 2 |
| Q4G176     | Acyl-CoA s3.47222222  | 1 | 1 | 1 | 64.1  | 8.37 | 35 | 1 |
| P35611     | Alpha-adduc1.62822252 | 1 | 1 | 1 | 80.9  | 5.83 | 48 | 1 |
| V9HWA0     | Aminoacylas5.14705882 | 1 | 1 | 1 | 45.9  | 6.18 | 0  | 1 |
| Q2TAL8     | Glutamine-12.31958763 | 2 | 2 | 2 | 86.4  | 5.87 | 24 | 2 |
| Q6UWP2     | Dehydrogen5           | 1 | 1 | 1 | 28.3  | 6.64 | 0  | 1 |
| P67812     | Signal pep16.70391061 | 1 | 1 | 1 | 20.6  | 9.48 | 0  | 1 |
| 015013     | Rho guanin1.24178232  | 1 | 1 | 1 | 151.5 | 5.68 | 0  | 1 |
| Q9UJW0     | Dynactin st3.69565217 | 1 | 1 | 1 | 52.3  | 7.34 | 0  | 1 |
| AOA024R6N2 | CDC42 bindi1.57802455 | 2 | 2 | 2 | 194.2 | 6.37 | 33 | 2 |
| AOA024R4S0 | Chromatin n4.05405405 | 1 | 1 | 1 | 25.1  | 5.97 | 33 | 1 |
| 060508     | Pre-mRNA-p1 2.417962  | 1 | 1 | 1 | 65.5  | 7.06 | 30 | 1 |
| J3QR07     | YTH domain3.1292517   | 2 | 2 | 2 | 85.5  | 6.23 | 27 | 2 |
| AOA0S2Z4B3 | RNA binding2.37529691 | 1 | 1 | 1 | 46.2  | 9.07 | 42 | 1 |
| B4DM85     | Kinesin-li13.36021505 | 3 | 3 | 2 | 84    | 6.47 | 43 | 3 |
| Q7Z4H8     | KDEL motif 3.3530572  | 1 | 1 | 1 | 58.5  | 8.24 | 38 | 1 |
| Q68CZ2     | Tensin-3 OS3.25259516 | 2 | 2 | 2 | 155.2 | 6.81 | 0  | 2 |
| Q14344     | Guanine nuc6.63129973 | 1 | 1 | 1 | 44    | 8    | 0  | 1 |
| Q99442     | Translocati5.26315789 | 2 | 2 | 2 | 45.8  | 7.12 | 0  | 2 |
| 015460     | Prolyl 4-hy2.05607477 | 1 | 1 | 1 | 60.9  | 5.71 | 54 | 1 |
| D3YTA9     | Calcineurin9.52380952 | 1 | 1 | 1 | 21.4  | 4.98 | 22 | 1 |
| Q15058     | Kinesin-li11.27427184 | 2 | 2 | 2 | 186.4 | 7.91 | 43 | 2 |
| 015379     | Histone de14.43925234 | 2 | 2 | 1 | 48.8  | 5.16 | 0  | 2 |
| P19388     | DNA-direct10          | 2 | 2 | 2 | 24.5  | 5.95 | 45 | 2 |
| Q5VV42     | Threonylcar4.31778929 | 2 | 2 | 2 | 65.1  | 7.46 | 0  | 2 |
| 095159     | Zinc finger4.83870968 | 1 | 1 | 1 | 34.1  | 8.07 | 0  | 1 |
| 075312     | Zinc finger3.7037037  | 2 | 2 | 2 | 50.9  | 4.73 | 46 | 2 |
| F5H039     | Gephyrin OS1.79028133 | 1 | 1 | 1 | 84.7  | 5.73 | 41 | 1 |
| Q4FZ45     | Chromosome 5.55555556 | 1 | 1 | 1 | 23.4  | 9.7  | 54 | 1 |
| Q9Y223     | Bifunction3.87811634  | 2 | 2 | 2 | 79.2  | 6.8  | 37 | 2 |
| AOA024QZE9 | Uncharacter4.82758621 | 1 | 1 | 1 | 32.4  | 5.07 | 51 | 1 |
| Q53GQ0     | Very-long-c5.12820513 | 1 | 1 | 1 | 34.3  | 9.32 | 0  | 1 |
| P53602     | Diphosphome 5.25      | 1 | 1 | 1 | 43.4  | 7.23 | 0  | 1 |
| Q9UDW1     | Cytochrome 26.984127  | 1 | 1 | 1 | 7.3   | 9.47 | 0  | 1 |
| Q8N451     | RNASEH2B p13.92749245 | 1 | 1 | 1 | 37.3  | 9.14 | 51 | 1 |
| AOA024RAF7 | Endothelin 2.85714286 | 1 | 1 | 1 | 87.1  | 5.88 | 20 | 1 |
| 000178     | GTP-binding3.28849028 | 2 | 2 | 2 | 72.4  | 8.34 | 44 | 2 |
| 000483     | Cytochrome 22.2222222 | 2 | 2 | 2 | 9.4   | 9.38 | 40 | 2 |
| 015198     | Mothers age2.35546039 | 1 | 1 | 1 | 52.5  | 7.77 | 40 | 1 |
| A8K1U9     | cDNA FLJ7674.33017591 | 2 | 2 | 2 | 83    | 8.81 | 0  | 2 |
| Q00535     | Cyclin-depe5.47945205 | 2 | 3 | 1 | 33.3  | 7.66 | 76 | 2 |
| B7ZKJ8     | ITIH4 prote0.96256684 | 1 | 1 | 1 | 103.8 | 6.89 | 38 | 1 |
| Q7L5L3     | Glycerophos7.54716981 | 2 | 2 | 2 | 36.6  | 7.97 | 0  | 2 |
| Q15477     | Helicase S12.08667737 | 2 | 2 | 2 | 137.7 | 6.06 | 34 | 2 |
| Q9NR12     | PDZ and LIM6.12691466 | 2 | 2 | 2 | 49.8  | 8.41 | 0  | 2 |
| Q9BW60     | Elongation 4.30107527 | 1 | 1 | 1 | 32.6  | 9.6  | 48 | 1 |
| B2R6K1     | cDNA, FLJ91.46666667  | 1 | 1 | 1 | 83    | 7.06 | 0  | 1 |
| Q8TCF1     | ANI-type zi5.59701493 | 1 | 1 | 1 | 30.8  | 7.39 | 0  | 1 |
| P12074     | Cytochrome 26.6055046 | 1 | 3 | 1 | 12.1  | 9.32 | 0  | 1 |
| Q9HOR4     | Haloacid de5.01930502 | 1 | 1 | 1 | 28.5  | 6.24 | 45 | 1 |
| Q06547     | GA-binding 2.53164557 | 1 | 1 | 1 | 42.5  | 4.86 | 60 | 1 |
| Q9BSJ2     | Gamma-tubul 1.2195122 | 1 | 1 | 1 | 102.5 | 6.84 | 39 | 1 |
| Q9BYD5     | Cornifelin 19.6428571 | 1 | 1 | 1 | 12.4  | 6.1  | 36 | 1 |
| Q13541     | Eukaryotic 10.1694915 | 1 | 1 | 1 | 12.6  | 5.48 | 52 | 1 |
| Q6PID6     | Tetratricol11.4503817 | 1 | 2 | 1 | 29.4  | 5.44 | 0  | 1 |
| P33897     | ATP-binding1.87919463 | 1 | 1 | 1 | 82.9  | 8.95 | 56 | 1 |
| 014684     | Prostagland7.89473684 | 2 | 2 | 2 | 17.1  | 9.5  | 44 | 2 |
| Q96ES7     | SAGA-associ4.43686007 | 1 | 1 | 1 | 33.2  | 8.1  | 34 | 1 |
| P78330     | Phosphoseri6.22222222 | 1 | 1 | 1 | 25    | 5.69 | 0  | 1 |
| Q9BXV9     | Uncharacter 18        | 1 | 1 | 1 | 10.9  | 4.27 | 45 | 1 |

|            |                         |   |   |   |       |       |    |   |
|------------|-------------------------|---|---|---|-------|-------|----|---|
| Q08379     | Golgin subf1.09780439   | 1 | 1 | 1 | 113   | 5.02  | 54 | 1 |
| Q13546     | Receptor-ir2.68256334   | 1 | 1 | 1 | 75.9  | 6.33  | 0  | 1 |
| Q86WV7     | CCDC43 prot7.04845815   | 1 | 1 | 1 | 25.5  | 4.92  | 42 | 1 |
| Q06136     | 3-ketodihydro2.21686747 | 1 | 1 | 1 | 36.2  | 7.12  | 0  | 1 |
| Q9H6T0     | Epithelial 2.33837689   | 2 | 3 | 1 | 78.4  | 6.71  | 54 | 2 |
| Q92685     | Dol-P-Man:12.73972603   | 1 | 1 | 1 | 50.1  | 9.44  | 61 | 1 |
| Q9NVU7     | Protein SDf 2.62008734  | 2 | 2 | 2 | 79.8  | 9.25  | 44 | 2 |
| P49427     | Ubiquitin-c7.20338983   | 2 | 2 | 2 | 26.7  | 4.54  | 40 | 2 |
| Q9H467     | CUE domain-4.52961672   | 1 | 1 | 1 | 32    | 4.81  | 52 | 1 |
| P15954     | Cytochrome 28.5714286   | 1 | 1 | 1 | 7.2   | 10.27 | 0  | 1 |
| O15511     | Actin-relat11.9205298   | 2 | 2 | 2 | 16.3  | 5.67  | 73 | 2 |
| Q9BXW9     | Fanconi anc0.82701585   | 1 | 1 | 1 | 164   | 5.88  | 51 | 1 |
| V9HW45     | Epididymis 7.27969349   | 1 | 1 | 1 | 30    | 7.06  | 0  | 1 |
| O60524     | Nuclear exp0.92936803   | 1 | 1 | 1 | 122.9 | 6.35  | 41 | 1 |
| O15270     | Serine paln2.31316726   | 1 | 1 | 1 | 62.9  | 7.78  | 0  | 1 |
| Q9H981     | Actin-relat2.08333333   | 1 | 1 | 1 | 70.4  | 7.78  | 54 | 1 |
| O43815     | Striatin O52.17948718   | 2 | 2 | 2 | 86.1  | 5.27  | 31 | 2 |
| Q96HR8     | H/ACA ribor 3.2388664   | 1 | 1 | 1 | 53.7  | 4.87  | 0  | 1 |
| P20591     | Interferon-2.71903323   | 1 | 1 | 1 | 75.5  | 5.83  | 0  | 1 |
| B3EWG4     | Putative p123.5955056   | 1 | 1 | 1 | 9.3   | 6.15  | 0  | 1 |
| Q9Y5V0     | Zinc finger14.4736842   | 1 | 1 | 1 | 8.5   | 10.01 | 38 | 1 |
| Q96S82     | Ubiquitin-12.63157895   | 1 | 1 | 1 | 40.5  | 5.07  | 41 | 1 |
| Q9UJ70     | N-acetyl-D-2.61627907   | 1 | 1 | 1 | 37.4  | 6.24  | 39 | 1 |
| Q9NPF0     | CD320 anti7.80141844    | 2 | 2 | 2 | 29    | 4.75  | 27 | 2 |
| O75391     | Sperm-assoc4.40528634   | 1 | 1 | 1 | 26    | 7.91  | 68 | 1 |
| O15116     | U6 snRNA-as12.7819549   | 1 | 1 | 1 | 15.2  | 5.22  | 0  | 1 |
| Q92733     | Proline-ric5.90631365   | 2 | 2 | 2 | 52.4  | 5.1   | 0  | 2 |
| Q96F86     | Enhancer of5.31496063   | 2 | 2 | 2 | 56    | 7.11  | 39 | 2 |
| AOA024R726 | Protein arg 3.9017341   | 1 | 1 | 1 | 78.4  | 5.57  | 0  | 1 |
| B2RD09     | cDNA, FLJ966.22317597   | 1 | 2 | 1 | 50.4  | 9.03  | 0  | 1 |
| O94842     | TOX high mc 3.7037037   | 1 | 2 | 1 | 66.2  | 5.06  | 22 | 1 |
| Q6IN84     | rRNA methyl3.39943343   | 1 | 1 | 1 | 38.6  | 7.94  | 39 | 1 |
| AOA024RC47 | Zinc finger5.16304348   | 2 | 2 | 2 | 42.1  | 6.21  | 57 | 2 |
| Q9BVC5     | Ashwin OS=18.62068966   | 1 | 1 | 1 | 25.8  | 9.74  | 0  | 1 |
| O15162     | Phospholipi4.08805031   | 1 | 1 | 1 | 35    | 4.94  | 46 | 1 |
| Q9UBW8     | COP9 signal4.36363636   | 1 | 1 | 1 | 30.3  | 8.22  | 51 | 1 |
| B1AKJ6     | Oxysterol-t5.12820513   | 1 | 1 | 1 | 83.7  | 6.48  | 0  | 1 |
| Q96T23     | Remodeling 1.52671756   | 1 | 1 | 1 | 163.7 | 5.01  | 47 | 1 |
| AOA1B0GVH5 | Alpha-keto7 3.0411449   | 2 | 2 | 2 | 64.1  | 5.38  | 53 | 2 |
| Q06330     | Recombining 3.6         | 2 | 2 | 2 | 55.6  | 7.18  | 0  | 2 |
| O00399     | Dynactin st 9.47368421  | 1 | 1 | 1 | 20.7  | 6.32  | 0  | 1 |
| P20585     | DNA mismatch2.02286719  | 1 | 1 | 1 | 127.3 | 8.02  | 0  | 1 |
| Q9UL63     | Muskelin O52.44897959   | 1 | 1 | 1 | 84.7  | 6.34  | 0  | 1 |
| Q9BT09     | Protein car6.83453237   | 1 | 1 | 1 | 30.7  | 5.49  | 0  | 1 |
| O95067     | G2/mitotic- 2.7638191   | 1 | 1 | 1 | 45.3  | 8.9   | 42 | 1 |
| Q8NCF5     | NFATC2-inte4.05727924   | 1 | 1 | 1 | 45.8  | 6.6   | 0  | 1 |
| AOA024R001 | Transmembræ8.92857143   | 1 | 1 | 1 | 11.6  | 9.88  | 27 | 1 |
| Q8WUR7     | UPF0235 prc8.49673203   | 1 | 1 | 1 | 16.3  | 9.83  | 37 | 1 |
| B2RBI4     | cDNA, FLJ961.77111717   | 1 | 1 | 1 | 81.8  | 6.64  | 0  | 1 |
| Q6P3X3     | Tetratricof1.54211151   | 1 | 1 | 1 | 96.6  | 5.59  | 42 | 1 |
| Q5T1C6     | Acyl-coenzym 5          | 1 | 1 | 1 | 27.1  | 8.28  | 0  | 1 |
| Q75N03     | E3 ubiquiti4.07331976   | 1 | 1 | 1 | 54.5  | 8.29  | 0  | 1 |
| AOA0A0MTL5 | S-phase kir2.29885057   | 1 | 1 | 1 | 48.9  | 6.99  | 51 | 1 |
| Q9BVQ7     | Spermatoger 1.5936255   | 1 | 1 | 1 | 80.7  | 8.09  | 36 | 1 |
| B3KME2     | cDNA FLJ1075.73566085   | 2 | 2 | 2 | 46.5  | 5.85  | 44 | 2 |
| P62312     | U6 snRNA-as 27.5        | 2 | 2 | 2 | 9.1   | 9.58  | 0  | 2 |
| Q9BY20     | Methylthio16.50406504   | 1 | 1 | 1 | 39.1  | 6.3   | 0  | 1 |
| O95989     | Diphosphoir9.88372093   | 1 | 1 | 1 | 19.5  | 6.34  | 0  | 1 |
| Q541A5     | Ubiquitin 18.46905537   | 2 | 2 | 2 | 34.5  | 6.7   | 0  | 2 |
| Q4LE43     | Phosphoinos1.41643059   | 1 | 1 | 1 | 161.2 | 7.18  | 0  | 1 |
| B3KNI0     | cDNA FLJ1461.14449213   | 1 | 1 | 1 | 78.6  | 6.51  | 43 | 1 |
| HOYNJ6     | GMP reducte4.44964871   | 2 | 2 | 2 | 46.9  | 8.51  | 34 | 2 |
| Q9BWH2     | FUN14 domai5.29100529   | 2 | 2 | 2 | 20.7  | 9.73  | 41 | 2 |
| P30536     | Translocatc4.73372781   | 1 | 1 | 1 | 18.8  | 9.36  | 46 | 1 |
| P53384     | Cytosolic F 5.625       | 1 | 1 | 1 | 34.5  | 5.33  | 38 | 1 |
| P12532     | Creatine ki8.15347722   | 1 | 3 | 1 | 47    | 8.34  | 0  | 1 |
| E9PN81     | Ribonucleas9.71659919   | 1 | 1 | 1 | 26.3  | 6.37  | 0  | 1 |
| Q9H6X2     | Anthrax tox1.77304965   | 1 | 1 | 1 | 62.7  | 7.61  | 46 | 1 |
| B2R7D2     | cDNA, FLJ962.2587269    | 1 | 1 | 1 | 55.1  | 7.97  | 0  | 1 |
| Q86UE8     | Serine/thre 1.8134715   | 2 | 2 | 1 | 87.6  | 8.41  | 39 | 2 |
| AOA0A0MR51 | Fatty acid 3.19361277   | 2 | 2 | 2 | 57.8  | 9.48  | 0  | 2 |
| P61086     | Ubiquitin-c 9           | 1 | 1 | 1 | 22.4  | 5.44  | 0  | 1 |
| P29084     | Transcripti5.15463918   | 2 | 2 | 2 | 33    | 9.66  | 24 | 2 |
| Q96AT1     | Uncharacter20.1298701   | 2 | 2 | 2 | 17.5  | 6.11  | 0  | 2 |
| Q8IXT5     | RNA-binding 1.3986014   | 1 | 1 | 1 | 118   | 6.81  | 23 | 1 |
| P46108     | Adapter mol4.93421053   | 1 | 1 | 1 | 33.8  | 5.55  | 0  | 1 |
| O15400     | Syntaxin-7 3.83141762   | 1 | 1 | 1 | 29.8  | 5.55  | 41 | 1 |

|            |                        |   |   |   |       |       |    |   |
|------------|------------------------|---|---|---|-------|-------|----|---|
| Q15814     | Tubulin-spec3.75722543 | 1 | 1 | 1 | 39.2  | 5.71  | 61 | 1 |
| AOA146IHPO | SUN domain-1.57657658  | 1 | 2 | 1 | 98.7  | 7.39  | 36 | 1 |
| P19838     | Nuclear fac1.85950413  | 1 | 1 | 1 | 105.3 | 5.4   | 0  | 1 |
| P62253     | Ubiquitin-c6.88235294  | 1 | 1 | 1 | 19.5  | 5.3   | 56 | 1 |
| AOA0A0MQS1 | Proline-8.04195804     | 1 | 1 | 1 | 29.9  | 8.1   | 0  | 1 |
| Q8N556     | Actin filan1.36986301  | 1 | 1 | 1 | 80.7  | 8.68  | 63 | 1 |
| Q9NPQ8     | Synembryn-13.38983051  | 1 | 1 | 1 | 59.7  | 5.33  | 42 | 1 |
| Q04721     | Neurogenic 0.4451639   | 1 | 1 | 1 | 265.2 | 5.14  | 0  | 1 |
| Q96ST2     | Protein IW2.07570208   | 1 | 1 | 1 | 91.9  | 4.69  | 0  | 1 |
| Q8N3C0     | Activating 1.58946412  | 2 | 2 | 2 | 251.3 | 7.09  | 37 | 2 |
| P36551     | Oxygen-dep3.74449339   | 1 | 1 | 1 | 50.1  | 8.25  | 0  | 1 |
| P52434     | DNA-direct10.6666667   | 1 | 1 | 1 | 17.1  | 4.68  | 0  | 1 |
| Q9P013     | Spliceosome10.9170306  | 2 | 2 | 2 | 26.6  | 5.71  | 21 | 2 |
| Q9NU02     | Ankyrin re1.67525773   | 2 | 2 | 1 | 86.6  | 8.28  | 36 | 2 |
| B4E2Q0     | Calcium-tr1.15424974   | 1 | 1 | 1 | 104.6 | 7.2   | 45 | 1 |
| Q7L4I2     | Arginine/se2.30414747  | 1 | 1 | 1 | 50.5  | 11.33 | 45 | 1 |
| P56381     | ATP synthas29.4117647  | 2 | 2 | 2 | 5.8   | 9.92  | 46 | 2 |
| P61077     | Ubiquitin-c6.80272109  | 1 | 1 | 1 | 16.7  | 7.8   | 46 | 1 |
| P47712     | Cytosolic p2.93724967  | 1 | 1 | 1 | 85.2  | 5.38  | 43 | 1 |
| 095155     | Ubiquitin c1.30568356  | 1 | 1 | 1 | 146.1 | 6.55  | 37 | 1 |
| Q658J6     | Microtubule 11.2       | 1 | 1 | 1 | 14.7  | 8.94  | 0  | 1 |
| Q9UK22     | F-box only 4.72972973  | 1 | 1 | 1 | 33.3  | 4.37  | 41 | 1 |
| Q9Y3A2     | Probable U3.4.743083   | 1 | 2 | 1 | 30.4  | 10.15 | 38 | 1 |
| 095833     | Chloride ir9.74576271  | 2 | 2 | 2 | 26.6  | 6.43  | 37 | 2 |
| AOA087X295 | WD repeat-c1.12945265  | 1 | 1 | 1 | 124.9 | 6.92  | 24 | 1 |
| AOA1C7CYX1 | ELM2 and S12.82074613  | 2 | 2 | 2 | 120.7 | 9.29  | 39 | 2 |
| P55081     | Microfibril2.96127563  | 1 | 1 | 1 | 51.9  | 4.98  | 0  | 1 |
| P48651     | Phosphatidy 2.1141649  | 1 | 1 | 1 | 55.5  | 8.43  | 41 | 1 |
| B3KRW4     | cDNA FLJ3494.74516696  | 2 | 2 | 2 | 63.5  | 4.78  | 20 | 2 |
| Q5T750     | Skin-specif 8.4        | 2 | 2 | 2 | 26.2  | 7.97  | 0  | 2 |
| P08069     | Insulin-li11.60936357  | 2 | 2 | 2 | 154.7 | 5.8   | 32 | 2 |
| Q96E15     | Transcripti6.51162791  | 1 | 1 | 1 | 24.6  | 5.2   | 46 | 1 |
| Q9Y4R8     | Telomere l12.27001195  | 2 | 2 | 2 | 91.7  | 5.76  | 28 | 2 |
| 075817     | Ribonucleas13.5714286  | 1 | 1 | 1 | 15.6  | 8.94  | 0  | 1 |
| J3KPT4     | TraB domain3.16622691  | 1 | 1 | 1 | 42.7  | 8     | 0  | 1 |
| Q969E2     | Secretory c4.80349345  | 1 | 1 | 1 | 25.7  | 8.82  | 36 | 1 |
| 075880     | Protein SC5.31561462   | 1 | 1 | 1 | 33.8  | 8.88  | 0  | 1 |
| Q9Y6A4     | Cilia- and 6.21761658  | 1 | 1 | 1 | 22.8  | 9.76  | 0  | 1 |
| F2Z2W7     | tRNA (uracil).55520995 | 1 | 1 | 1 | 70.8  | 8.05  | 34 | 1 |
| X6R2S6     | Signal pep10.0591716   | 1 | 1 | 1 | 18.3  | 8.72  | 56 | 1 |
| Q8IXI1     | Mitochondri1.61812298  | 1 | 1 | 1 | 68.1  | 5.86  | 55 | 1 |
| Q9UK41     | Vacuolar pi11.3122172  | 1 | 1 | 1 | 25.4  | 5.54  | 0  | 1 |
| Q9NV88     | Integrator 3.19148936  | 1 | 1 | 1 | 73.8  | 6.33  | 0  | 1 |
| B2R6S2     | cDNA, FLJ93.6101083    | 1 | 2 | 1 | 31    | 5.81  | 33 | 1 |
| A8K5S3     | cDNA FLJ784.67032967   | 2 | 2 | 2 | 39.7  | 5.35  | 36 | 2 |
| Q9BYN0     | Sulfiredoxi6.56934307  | 1 | 1 | 1 | 14.3  | 8.19  | 34 | 1 |
| Q99447     | Ethanolami4.88431877   | 1 | 1 | 1 | 43.8  | 6.92  | 0  | 1 |
| P17568     | NADH dehyd6.56934307   | 1 | 1 | 1 | 16.4  | 8.92  | 0  | 1 |
| P49711     | Transcripti2.06327373  | 1 | 1 | 1 | 82.7  | 6.96  | 0  | 1 |
| Q9UBB5     | Methyl-CpG-6.81265207  | 2 | 2 | 1 | 43.2  | 10.04 | 0  | 2 |
| 095168     | NADH dehyd13.9534884   | 1 | 1 | 1 | 15.2  | 9.85  | 0  | 1 |
| Q9H6W3     | Bifunction2.18408736   | 1 | 1 | 1 | 71    | 6.46  | 0  | 1 |
| 000442     | RNA 3'-term3.82513661  | 1 | 1 | 1 | 39.3  | 7.85  | 54 | 1 |
| Q6R327     | Rapamycin-i0.99531616  | 1 | 1 | 1 | 192.1 | 7.47  | 37 | 1 |
| Q9NZH8     | Interleukin7.10059172  | 1 | 1 | 1 | 18.7  | 5.14  | 0  | 1 |
| 076080     | ANI-type zi24.4131455  | 2 | 2 | 2 | 23.1  | 8.51  | 33 | 2 |
| 075818     | Ribonucleas 4.4077135  | 2 | 2 | 2 | 41.8  | 6.67  | 26 | 2 |
| Q04206     | Transcripti2.35934664  | 1 | 1 | 1 | 60.2  | 5.68  | 36 | 1 |
| J3KQ42     | Tetraspanin9.72762646  | 1 | 1 | 1 | 28    | 7.42  | 0  | 1 |
| Q15054     | DNA polymer2.78969957  | 1 | 1 | 1 | 51.4  | 9.35  | 45 | 1 |
| Q5JWF2     | Guanine nuc1.54291225  | 1 | 1 | 1 | 111   | 5.03  | 53 | 1 |
| Q9UBH0     | Interleukin11.6129032  | 1 | 1 | 1 | 17    | 5.2   | 0  | 1 |
| Q9H788     | SH2 domain-2.42290749  | 1 | 2 | 1 | 52.7  | 8.06  | 0  | 1 |
| 014936     | Peripheral 1.40388769  | 1 | 1 | 1 | 105.1 | 6.43  | 0  | 1 |
| Q15528     | Mediator of 7          | 1 | 1 | 1 | 22.2  | 4.68  | 0  | 1 |
| Q9BYN8     | 28S ribosom 4.3902439  | 1 | 1 | 1 | 24.2  | 10.39 | 51 | 1 |
| P78316     | Nucleolar p1.05017503  | 1 | 1 | 1 | 97.6  | 7.58  | 38 | 1 |
| Q3B7T1     | Erythroid c0.88852989  | 1 | 1 | 1 | 138.4 | 6.33  | 36 | 1 |
| Q96K21     | Abscission/3.18471338  | 2 | 2 | 1 | 51.5  | 5.73  | 36 | 2 |
| B4E1C1     | cDNA FLJ5592.12765957  | 1 | 1 | 1 | 82.8  | 4.89  | 0  | 1 |
| AOA140VJT2 | Testicular 5.53505535  | 1 | 1 | 1 | 29.8  | 5.74  | 0  | 1 |
| Q96BQ5     | Coiled-coil 5          | 1 | 1 | 1 | 30.8  | 9.2   | 30 | 1 |
| J3KNQ4     | Alpha-parvi6.06796117  | 2 | 2 | 2 | 46.6  | 8.4   | 0  | 2 |
| Q9UPT8     | Zinc finger2.45587107  | 2 | 2 | 2 | 140.2 | 6.27  | 23 | 2 |
| P19474     | E3 ubiquiti3.78947368  | 1 | 1 | 1 | 54.1  | 6.38  | 18 | 1 |
| Q6ZRV2     | Protein FAM1.78117048  | 1 | 1 | 1 | 127   | 6.98  | 0  | 1 |
| B2R8I2     | cDNA, FLJ931.71428571  | 1 | 1 | 1 | 59.5  | 7.44  | 51 | 1 |

|            |             |             |   |   |   |       |       |    |   |
|------------|-------------|-------------|---|---|---|-------|-------|----|---|
| E7ERK9     | Translatior | 2.57352941  | 1 | 1 | 1 | 59.7  | 9.42  | 39 | 1 |
| Q9POM9     | 39S ribosom | 10.1351351  | 1 | 1 | 1 | 16.1  | 10.42 | 26 | 1 |
| Q9H6Y7     | E3 ubiquiti | 3.14285714  | 1 | 1 | 1 | 38.3  | 5.63  | 0  | 1 |
| Q12986     | Transcripti | 1.16071429  | 1 | 1 | 1 | 124.3 | 8.24  | 31 | 1 |
| Q7Z7K0     | COX assembl | 9.43396226  | 1 | 1 | 1 | 12.5  | 8.63  | 48 | 1 |
| Q69YN4     | Protein vii | 1.04856512  | 1 | 1 | 1 | 201.9 | 5.01  | 0  | 1 |
| A0JP11     | Phosphoinos | 1.10456554  | 1 | 1 | 1 | 153.1 | 7.23  | 38 | 1 |
| Q15714     | TSC22 domai | 1.77073625  | 1 | 1 | 1 | 109.6 | 5.64  | 0  | 1 |
| P11274     | Breakpoint  | 0.78678206  | 1 | 1 | 1 | 142.7 | 7.03  | 28 | 1 |
| HOY9X1     | Translatior | 6.19834711  | 1 | 1 | 1 | 27.7  | 9.57  | 0  | 1 |
| P17900     | Gangliosid  | 5.69948187  | 1 | 1 | 1 | 20.8  | 5.31  | 47 | 1 |
| P49454     | Centromere  | 0.46728972  | 2 | 2 | 1 | 367.5 | 5.07  | 50 | 2 |
| Q99959     | Plakophilin | 1.92962543  | 2 | 2 | 1 | 97.4  | 9.33  | 36 | 2 |
| 060271     | C-Jun-amin  | 0.90840273  | 1 | 1 | 1 | 146.1 | 5.15  | 0  | 1 |
| 095178     | NADH dehydr | 8.57142857  | 1 | 1 | 1 | 12.1  | 5.74  | 0  | 1 |
| Q14149     | MORC famil  | 1.81043663  | 1 | 1 | 1 | 107   | 5.6   | 0  | 1 |
| HOY8C3     | Mitochondri | 3.04568528  | 1 | 1 | 1 | 43.1  | 9.16  | 27 | 1 |
| Q9H9T3     | Elongator   | 3.65630713  | 1 | 1 | 1 | 62.2  | 8.88  | 0  | 1 |
| B2R9W9     | Craniofaci  | 7.69230769  | 1 | 1 | 1 | 33.6  | 4.81  | 0  | 1 |
| AOA169TED2 | Protein kir | 1.63690476  | 1 | 1 | 1 | 76.6  | 7.47  | 28 | 1 |
| Q9Y303     | N-acetylgl  | 2.93398533  | 1 | 1 | 1 | 43.7  | 6.7   | 0  | 1 |
| Q9NR09     | Baculoviral | 0.32942145  | 1 | 1 | 1 | 529.9 | 6.05  | 37 | 1 |
| B4DX46     | cDNA FLJ52  | 2.63157895  | 1 | 1 | 1 | 47.3  | 5.05  | 50 | 1 |
| Q8NAV1     | Pre-mRNA-s  | 2.56410256  | 1 | 1 | 1 | 37.5  | 9.96  | 48 | 1 |
| 075323     | Protein Ni  | 5.59440559  | 1 | 1 | 1 | 33.7  | 9.36  | 0  | 1 |
| Q9HBM1     | Kinetochor  | 7.58928571  | 2 | 2 | 2 | 26.1  | 8     | 18 | 2 |
| J3KQY1     | 39S ribosom | 5.17241379  | 1 | 1 | 1 | 26.5  | 9.74  | 0  | 1 |
| J3QR44     | Cyclin-depe | 1.63522013  | 1 | 1 | 1 | 92.6  | 5.54  | 0  | 1 |
| Q8N5N7     | 39S ribosom | 12.0253165  | 1 | 1 | 1 | 18.3  | 7.88  | 0  | 1 |
| B4DUA7     | Intersex-li | 6.33484163  | 1 | 1 | 1 | 23.5  | 8.16  | 45 | 1 |
| Q8NCA5     | Protein FAM | 1.92678227  | 1 | 1 | 1 | 55.4  | 9.03  | 46 | 1 |
| P82914     | 28S ribosom | 3.89105058  | 1 | 1 | 1 | 29.8  | 10.48 | 0  | 1 |
| Q6IAN0     | Dehydrogen  | 4           | 1 | 1 | 1 | 35.1  | 9.55  | 44 | 1 |
| Q8N6H7     | ADP-ribosyl | 1.72744722  | 1 | 1 | 1 | 56.7  | 7.99  | 34 | 1 |
| Q8IY17     | Neuropathy  | 0.87847731  | 1 | 1 | 1 | 149.9 | 7.81  | 56 | 1 |
| Q9ULX6     | A-kinase ar | 2.63157895  | 2 | 2 | 2 | 71.6  | 5.07  | 0  | 2 |
| AOAV96     | RNA-binding | 2.69814503  | 1 | 1 | 1 | 64.1  | 7.68  | 0  | 1 |
| 043819     | Protein SC  | 3.7593985   | 1 | 1 | 1 | 29.8  | 8.85  | 48 | 1 |
| Q59GX7     | Stearoyl-C  | 4.91803279  | 2 | 2 | 2 | 42.3  | 9.25  | 54 | 2 |
| Q8WWH5     | Probable t  | 3.15186246  | 1 | 1 | 1 | 37.2  | 8.25  | 23 | 1 |
| P41214     | Eukaryotic  | 2.9109589   | 1 | 1 | 1 | 64.7  | 7.65  | 0  | 1 |
| P13473     | Lysosome-as | 1.95121951  | 1 | 1 | 1 | 44.9  | 5.63  | 55 | 1 |
| D7PBN3     | ESRP1/RAF   | 1.79076343  | 2 | 3 | 1 | 118.5 | 8.22  | 44 | 2 |
| Q96QR8     | Transcripti | 4.48717949  | 2 | 2 | 2 | 33.2  | 5.43  | 0  | 2 |
| 095825     | Quinone oxi | 5.73065903  | 1 | 1 | 1 | 38.7  | 5.78  | 0  | 1 |
| A8K7G2     | cDNA FLJ75  | 3.05676856  | 1 | 1 | 1 | 48.8  | 9.96  | 28 | 1 |
| D3DR37     | Centrosomal | 2.15517241  | 1 | 1 | 1 | 54.1  | 6.96  | 29 | 1 |
| A2N160     | BRE (Fragm  | 16.6666667  | 1 | 1 | 1 | 11.9  | 4.56  | 0  | 1 |
| AOA024RBI7 | Glycolipid  | 7.17703349  | 1 | 1 | 1 | 23.8  | 7.39  | 19 | 1 |
| Q9H446     | RWD domain  | -4.9382716  | 1 | 1 | 1 | 27.9  | 4.2   | 0  | 1 |
| Q0ZFE3     | ATP synthas | 4.42477876  | 1 | 1 | 1 | 24.8  | 10.1  | 34 | 1 |
| E7EX59     | Propionyl-( | 2.80701754  | 1 | 1 | 1 | 61.6  | 7.99  | 0  | 1 |
| P46934     | E3 ubiquiti | 0.6823351   | 1 | 1 | 1 | 149   | 6.58  | 0  | 1 |
| Q5T5Y3     | Calmodulin  | -0.6866417  | 1 | 1 | 1 | 177.9 | 6.73  | 54 | 1 |
| Q6PL18     | ATPase fami | 0.86330935  | 1 | 1 | 1 | 158.5 | 6.32  | 44 | 1 |
| Q13206     | Probable A  | 1.71428571  | 2 | 2 | 2 | 100.8 | 8.63  | 24 | 2 |
| 015234     | Protein CA  | 2.27596017  | 1 | 1 | 1 | 76.2  | 6.48  | 0  | 1 |
| 043678     | NADH dehydr | 21.2121212  | 2 | 2 | 2 | 10.9  | 9.57  | 30 | 2 |
| Q9Y4X5     | E3 ubiquiti | 2.15439856  | 1 | 1 | 1 | 64.1  | 5.08  | 0  | 1 |
| F5HOC4     | Proteasomal | 3.30788804  | 1 | 1 | 1 | 42.7  | 6.16  | 0  | 1 |
| 000411     | DNA-direct  | 0.97560976  | 1 | 1 | 1 | 138.5 | 8.98  | 0  | 1 |
| P50336     | Protoporph  | 2.51572327  | 1 | 1 | 1 | 50.7  | 8.16  | 43 | 1 |
| Q5BIX2     | Chromosome  | 4.7029703   | 1 | 1 | 1 | 43.4  | 4.88  | 0  | 1 |
| B2RBB2     | cDNA, FLJ9  | f1.98198198 | 1 | 1 | 1 | 61.6  | 6.49  | 45 | 1 |
| AOA087WTT2 | Transmembr  | 8.66141732  | 1 | 1 | 1 | 13.6  | 9.94  | 0  | 1 |
| Q9H993     | Protein-gl  | 6.80272109  | 2 | 2 | 2 | 51.1  | 5.76  | 0  | 2 |
| Q8IV08     | Phospholip  | 2.44897959  | 1 | 1 | 1 | 54.7  | 6.47  | 35 | 1 |
| Q13636     | Ras-relate  | 5.67010309  | 1 | 1 | 1 | 21.6  | 7.06  | 55 | 1 |
| Q9ULC5     | Long-chain  | -2.04978038 | 1 | 1 | 1 | 75.9  | 6.92  | 0  | 1 |
| P22670     | MHC class   | 11.12359551 | 1 | 1 | 1 | 104.7 | 6.29  | 22 | 1 |
| LOR588     | Alternativ  | 8.80503145  | 2 | 3 | 1 | 18.4  | 11.3  | 0  | 2 |
| 095229     | ZW10 inter  | 4.33212996  | 1 | 1 | 1 | 31.3  | 5.15  | 36 | 1 |
| Q86TB9     | Protein PA  | 12.07792208 | 1 | 1 | 1 | 86.8  | 6.67  | 0  | 1 |
| Q92504     | Zinc trans  | 2.98507463  | 1 | 1 | 1 | 50.1  | 6.87  | 0  | 1 |
| 075792     | Ribonuclea  | 5.68561873  | 1 | 1 | 1 | 33.4  | 5.25  | 0  | 1 |
| Q8WXH0     | Nesprin-2   | (0.26143791 | 2 | 2 | 2 | 795.9 | 5.36  | 34 | 2 |
| J3KQL8     | Apolipopro  | 12.44988864 | 1 | 1 | 1 | 48.9  | 6     | 36 | 1 |

|            |             |              |   |   |   |       |       |    |   |
|------------|-------------|--------------|---|---|---|-------|-------|----|---|
| Q9BT17     | Mitochondri | 6.28742515   | 1 | 1 | 1 | 37.2  | 9.47  | 0  | 1 |
| Q9UJX2     | Cell divisi | 1.67504188   | 1 | 1 | 1 | 68.8  | 7.02  | 41 | 1 |
| Q9Y6G5     | COMM domai  | 4.45544554   | 1 | 1 | 1 | 23    | 6.54  | 52 | 1 |
| B1AKN8     | Nuclear fac | 2.44360902   | 1 | 1 | 1 | 58.5  | 8.56  | 44 | 1 |
| Q9BU23     | Lipase mat  | 2.26308345   | 1 | 1 | 1 | 79.6  | 10.1  | 0  | 1 |
| Q6IQ49     | Protein SDF | 2.2172949    | 1 | 1 | 1 | 49.7  | 6.05  | 40 | 1 |
| P17152     | Transmembr  | 5.20833333   | 1 | 1 | 1 | 21.5  | 7.36  | 18 | 1 |
| Q9H6Y2     | WD repeat   | -c2.61096606 | 1 | 1 | 1 | 42    | 4.92  | 25 | 1 |
| B3KTN5     | cDNA FLJ38  | 4            | 1 | 1 | 1 | 50.8  | 7.59  | 0  | 1 |
| Q9H944     | Mediator of | 6.60377358   | 1 | 1 | 1 | 23.2  | 6.87  | 41 | 1 |
| Q9H568     | Actin-like  | 3.27868852   | 1 | 1 | 1 | 41.3  | 6.14  | 0  | 1 |
| Q9HD26     | Golgi-assoc | 1.94805195   | 1 | 2 | 1 | 50.5  | 5.92  | 21 | 1 |
| Q9BTD8     | RNA-binding | 4.375        | 1 | 1 | 1 | 50.4  | 9.63  | 0  | 1 |
| Q3SXM5     | Inactive hy | 2.42424242   | 1 | 1 | 1 | 37    | 8.72  | 24 | 1 |
| AOAOS2Z4R4 | Hepatocyte  | 1.41570142   | 1 | 1 | 1 | 86.1  | 6.16  | 0  | 1 |
| Q14657     | EKC/KEOPS   | c16.0839161  | 1 | 1 | 1 | 14.8  | 8.63  | 0  | 1 |
| Q9Y6I9     | Testis-expr | 4.47284345   | 1 | 1 | 1 | 34.2  | 4.86  | 40 | 1 |
| Q7Z3T8     | Zinc finger | 1.29954516   | 2 | 2 | 2 | 168.8 | 4.82  | 0  | 2 |
| AOA0AOMQW3 | Serpin B13  | 1.75         | 1 | 1 | 1 | 45.3  | 5.82  | 45 | 1 |
| Q96KP1     | Exocyst con | 2.05627706   | 1 | 1 | 1 | 104   | 6.9   | 0  | 1 |
| D3DSY9     | Farnesyltra | 2.18818381   | 1 | 1 | 1 | 52.6  | 5.57  | 0  | 1 |
| AOA1BOGU48 | Kinesin-li  | 0.70460705   | 1 | 1 | 1 | 207.1 | 5.72  | 0  | 1 |
| Q9BZ17     | Regulator c | 2.48447205   | 1 | 1 | 1 | 57.7  | 9.48  | 32 | 1 |
| Q9NQZ2     | Something   | ε5.63674322  | 2 | 2 | 2 | 54.5  | 5.62  | 0  | 2 |
| B5MCA4     | Epithelial  | 7.30994152   | 1 | 1 | 1 | 37.9  | 8.47  | 0  | 1 |
| Q96P63     | Serpin B12  | 2.96296296   | 1 | 1 | 1 | 46.2  | 5.53  | 0  | 1 |
| AOA087WYA1 | Unconventi  | 0.56657224   | 2 | 3 | 2 | 395   | 9.16  | 65 | 2 |
| Q9NVV4     | Poly(A) RN  | 3.60824742   | 1 | 1 | 1 | 66.1  | 9.04  | 0  | 1 |
| AOA024RBR3 | Density-reg | 8.58585859   | 1 | 1 | 1 | 22.1  | 5.3   | 25 | 1 |
| Q13445     | Transmembr  | 3.96475771   | 1 | 1 | 1 | 25.2  | 4.48  | 45 | 1 |
| Q06609     | DNA repair  | 3.53982301   | 1 | 1 | 1 | 36.9  | 5.6   | 0  | 1 |
| AOA024R1X3 | Vacuolar pi | 14.2045455   | 2 | 2 | 2 | 20.7  | 6.34  | 0  | 2 |
| Q59EM5     | Arrestin b  | ε2.92682927  | 1 | 1 | 1 | 46    | 7.17  | 0  | 1 |
| Q9H300     | Presenilin  | 3.43007916   | 1 | 1 | 1 | 42.2  | 9.79  | 40 | 1 |
| Q5T200     | Zinc finger | 1.19904077   | 2 | 2 | 2 | 199.5 | 9.42  | 0  | 2 |
| A8K8N5     | cDNA FLJ76  | 0.89445438   | 1 | 1 | 1 | 127.4 | 8.56  | 45 | 1 |
| BOFTY2     | NudC-like   | 16.37119114  | 1 | 1 | 1 | 40.8  | 5.2   | 0  | 1 |
| AOA0C4DG49 | Poliovirus  | 2.87769784   | 1 | 1 | 1 | 45.3  | 6.52  | 33 | 1 |
| B4DIM6     | cDNA FLJ60  | 3.8647343    | 1 | 1 | 1 | 24.2  | 9.41  | 0  | 1 |
| Q92485     | Acid sphin  | 2.1978022    | 1 | 1 | 1 | 50.8  | 5.64  | 30 | 1 |
| P42773     | Cyclin-dep  | 7.14285714   | 1 | 1 | 1 | 18.1  | 6.52  | 32 | 1 |
| AOA024R250 | Nucleolar   | 1.36402387   | 2 | 2 | 2 | 132.2 | 6.95  | 46 | 2 |
| Q9H098     | Protein FAM | 11.4503817   | 1 | 2 | 1 | 15.5  | 8.29  | 23 | 1 |
| AOAOS2Z5E9 | CWF19-like  | 3.34572491   | 1 | 1 | 1 | 60.6  | 7.24  | 0  | 1 |
| Q9Y3A6     | Transmembr  | 3.930131     | 1 | 1 | 1 | 26    | 4.84  | 51 | 1 |
| I7FU17     | Putative G1 | 2.72108844   | 1 | 1 | 1 | 30.6  | 8.56  | 50 | 1 |
| F8VZG9     | RNA-binding | 2.14592275   | 1 | 1 | 1 | 50.5  | 6.1   | 40 | 1 |
| J3KQ41     | COP9 signa  | 7.91366906   | 1 | 1 | 1 | 31.5  | 8     | 16 | 1 |
| Q86U44     | N6-adenosi  | 2.06896552   | 1 | 1 | 1 | 64.4  | 6.42  | 0  | 1 |
| B2RAU5     | Sorting ne  | 2.35294118   | 1 | 1 | 1 | 66.5  | 5.66  | 0  | 1 |
| Q15650     | Activating  | 3.78657487   | 1 | 3 | 1 | 66.1  | 7.85  | 15 | 1 |
| D6RJ07     | Zinc finger | 3.5483871    | 1 | 1 | 1 | 34.6  | 9.22  | 0  | 1 |
| B2R623     | mRNA-cappi  | 1.67504188   | 1 | 1 | 1 | 68.4  | 8.22  | 43 | 1 |
| P08397     | Porphobilin | 4.43213296   | 2 | 2 | 2 | 39.3  | 7.18  | 20 | 2 |
| B4DY64     | cDNA FLJ52  | 12.78745645  | 1 | 1 | 1 | 30.8  | 11.31 | 42 | 1 |
| Q8TD16     | Protein bic | 1.45631068   | 1 | 1 | 1 | 93.5  | 5.44  | 40 | 1 |
| E7EVC7     | Autophagy-  | 13.52564103  | 1 | 1 | 1 | 70    | 6.62  | 24 | 1 |
| P62875     | DNA-direct  | ε16.4179104  | 1 | 1 | 1 | 7.6   | 7.77  | 0  | 1 |
| P41134     | DNA-binding | 11.6129032   | 1 | 1 | 1 | 16.1  | 6.99  | 27 | 1 |
| Q12899     | Tripartite  | 3.33951763   | 1 | 1 | 1 | 62.1  | 5.03  | 27 | 1 |
| O15084     | Serine/thr  | ε1.32953466  | 2 | 2 | 2 | 112.9 | 6.25  | 0  | 2 |
| Q59FM4     | Scavenger   | 11.37693632  | 1 | 1 | 1 | 64.1  | 8.54  | 29 | 1 |
| Q9H089     | Large subu  | 1.67173252   | 1 | 1 | 1 | 75.2  | 6.38  | 36 | 1 |
| B2RDI0     | cDNA, FLJ9  | 6.1.97368421 | 1 | 1 | 1 | 68.4  | 7.65  | 22 | 1 |
| AOA0AOMT33 | Protein SC  | 1.03780578   | 1 | 1 | 1 | 148.8 | 9.06  | 0  | 1 |
| AOA0J9YXC7 | LIM and ser | 3.01507538   | 1 | 1 | 1 | 45.7  | 7.88  | 0  | 1 |
| O43156     | TELO2-inter | 1.19375574   | 1 | 1 | 1 | 122   | 5.97  | 0  | 1 |
| O96006     | Zinc finger | 1.29682997   | 1 | 1 | 1 | 78.1  | 6.1   | 41 | 1 |
| Q9NX20     | 39S riboso  | 4.38247012   | 1 | 1 | 1 | 28.4  | 10.13 | 17 | 1 |
| Q92466     | DNA damage  | -2.10772834  | 1 | 1 | 1 | 47.8  | 9.47  | 18 | 1 |
| Q9Y5K6     | CD2-associ  | ε3.59937402  | 2 | 2 | 2 | 71.4  | 6.4   | 0  | 2 |
| Q9NZQ3     | NCK-intera  | 1.52354571   | 1 | 1 | 1 | 78.9  | 6.38  | 47 | 1 |
| O75128     | Protein coi | 0.87232355   | 1 | 1 | 1 | 135.5 | 7.75  | 30 | 1 |
| J3KR55     | Tyrosine-p  | 18.39002268  | 1 | 2 | 1 | 49.1  | 8.56  | 0  | 1 |
| Q9UJ68     | Mitochondri | 6.38297872   | 1 | 1 | 1 | 26.1  | 8.09  | 0  | 1 |
| P53801     | Pituitary   | 1.10         | 1 | 1 | 1 | 20.3  | 8.79  | 32 | 1 |
| B4DPG9     | cDNA FLJ59  | 6.2.5862069  | 1 | 1 | 1 | 37.5  | 9.89  | 32 | 1 |

|            |              |            |   |   |   |       |       |    |   |
|------------|--------------|------------|---|---|---|-------|-------|----|---|
| P61244     | Protein ma   | 6.25       | 1 | 1 | 1 | 18.3  | 6.3   | 45 | 1 |
| Q9NPF4     | Probable tF6 | 26865672   | 1 | 1 | 1 | 36.4  | 6.35  | 0  | 1 |
| A2RUF3     | SLIT-ROBO F0 | 93370682   | 1 | 1 | 1 | 120.8 | 6.7   | 0  | 1 |
| O15427     | Monocarboxy2 | 79569892   | 1 | 1 | 1 | 49.4  | 7.96  | 0  | 1 |
| Q96PC5     | Melanoma ir0 | 84985836   | 1 | 1 | 1 | 159.7 | 4.69  | 20 | 1 |
| F6S8M0     | N-acetylglu  | 2.05479452 | 1 | 1 | 1 | 65.7  | 7.97  | 42 | 1 |
| Q9P260     | LisH domair0 | 98684211   | 1 | 1 | 1 | 134.5 | 5.45  | 0  | 1 |
| Q9BV68     | E3 ubiquiti  | 2.7607362  | 1 | 1 | 1 | 35.6  | 5.72  | 43 | 1 |
| Q5J7U2     | TGF beta-ir6 | 92307692   | 2 | 2 | 2 | 30    | 10.27 | 0  | 2 |
| Q6P158     | Putative A10 | 79365079   | 1 | 1 | 1 | 155.5 | 7.71  | 37 | 1 |
| P85037     | Forkhead bc1 | 09140518   | 1 | 1 | 1 | 75.4  | 9.32  | 21 | 1 |
| Q9HC52     | Chromobox p2 | 57069409   | 1 | 1 | 1 | 43.4  | 9.91  | 0  | 1 |
| AOA024R2L1 | Testicular 2 | 21565731   | 1 | 1 | 1 | 76.2  | 7.03  | 0  | 1 |
| Q59FZ4     | Serine/thre3 | 32681018   | 1 | 1 | 1 | 57.8  | 5.16  | 0  | 1 |
| Q14676     | Mediator of0 | 43082815   | 1 | 1 | 1 | 226.5 | 5.47  | 0  | 1 |
| AOA024R806 | Uncharacteri | 19.6721311 | 1 | 1 | 1 | 13.1  | 7.88  | 0  | 1 |
| Q9H479     | Fructosamir  | 3.23624595 | 2 | 2 | 2 | 35.1  | 7.55  | 0  | 2 |
| AOA024R7X0 | ADP-ribosyl1 | 18983234   | 1 | 1 | 1 | 208.6 | 5.85  | 0  | 1 |
| P51580     | Thiopurine 3 | 26530612   | 1 | 1 | 1 | 28.2  | 6.23  | 40 | 1 |
| H7BZF5     | Uncharacteri | 5.75539568 | 1 | 1 | 1 | 15.7  | 9.83  | 54 | 1 |
| Q9BPZ3     | Polyadenylt  | 23.6220472 | 1 | 1 | 1 | 15    | 4.12  | 0  | 1 |
| O60287     | Nucleolar p0 | 83663584   | 2 | 2 | 2 | 254.2 | 6.47  | 0  | 2 |
| P17544     | Cyclic AMP-4 | 25101215   | 1 | 1 | 1 | 52.9  | 8.65  | 0  | 1 |
| O94927     | HAUS augmir  | 1.73775671 | 1 | 1 | 1 | 71.6  | 8.51  | 21 | 1 |
| Q9BTU6     | Phosphatidy  | 1.87891441 | 1 | 1 | 1 | 54    | 8.29  | 44 | 1 |
| Q93050     | V-type prot2 | 27001195   | 1 | 1 | 1 | 96.4  | 6.43  | 0  | 1 |
| AOA0S2Z2Z3 | ATP-binding1 | 32802125   | 1 | 1 | 1 | 82.7  | 9.33  | 33 | 1 |
| Q6PJG6     | BRCA1-associ | 1.70523752 | 1 | 1 | 1 | 88.1  | 5.27  | 27 | 1 |
| Q7Z4S6     | Kinesin-li0  | 65710872   | 1 | 1 | 1 | 187.1 | 6.42  | 17 | 1 |
| Q9UJ41     | Rab5 GDP/G1  | 1.41242938 | 1 | 1 | 1 | 79.3  | 6.81  | 0  | 1 |
| Q8N122     | Regulatory-0 | 82397004   | 1 | 1 | 1 | 148.9 | 6.89  | 43 | 1 |
| Q9H7B4     | Histone-lys3 | 03738318   | 1 | 1 | 1 | 49.1  | 7.25  | 19 | 1 |
| Q14669     | E3 ubiquiti0 | 45180723   | 1 | 1 | 1 | 220.3 | 8.48  | 46 | 1 |
| B3KP06     | cDNA FLJ30t  | 1.21212121 | 1 | 1 | 1 | 92.5  | 7.84  | 0  | 1 |
| H6QX63     | Hepatocellit | 8.19672131 | 2 | 2 | 2 | 34.8  | 10.78 | 0  | 2 |
| B2RE29     | cDNA, FLJ9t  | 8.28729282 | 1 | 1 | 1 | 20.5  | 6.35  | 0  | 1 |
| Q9H857     | 5'-nucleotil | 1.73076923 | 1 | 1 | 1 | 60.7  | 6.77  | 0  | 1 |
| Q7LBC6     | Lysine-spec0 | 68143101   | 1 | 1 | 1 | 191.5 | 7.18  | 15 | 1 |
| Q9NR33     | DNA polymer  | 8.54700855 | 1 | 1 | 1 | 12.2  | 4.92  | 0  | 1 |
| Q14241     | Elongin-A (1 | 37844612   | 1 | 1 | 1 | 89.9  | 9.57  | 37 | 1 |
| AOA024R9I0 | V-type prot3 | 14136126   | 1 | 1 | 1 | 43.9  | 7.46  | 0  | 1 |
| Q59G13     | Syntaxin 1t7 | 83289817   | 1 | 1 | 1 | 43.3  | 7.11  | 0  | 1 |
| Q9POU3     | Sentrin-spec | 1.55279503 | 1 | 1 | 1 | 73.4  | 8.47  | 0  | 1 |
| P30038     | Delta-1-ppi  | 2.6642984  | 1 | 1 | 1 | 61.7  | 8.07  | 0  | 1 |
| B2RA39     | cDNA, FLJ9t  | 2.28471002 | 1 | 1 | 1 | 64.3  | 7.06  | 0  | 1 |
| E9PQA6     | Multivesict  | 5.49450549 | 1 | 1 | 1 | 28.7  | 9.64  | 0  | 1 |
| Q9BRZ2     | E3 ubiquiti1 | 1.58940397 | 1 | 1 | 1 | 81.4  | 7.74  | 0  | 1 |
| Q96AA3     | Protein RF12 | 0.3327172  | 1 | 1 | 1 | 60.3  | 8.85  | 20 | 1 |
| Q5JRA6     | Melanoma ir0 | 94389093   | 1 | 1 | 1 | 213.6 | 4.84  | 0  | 1 |
| Q9UBV8     | Peflin OS-t  | 3.87323944 | 1 | 1 | 1 | 30.4  | 6.54  | 38 | 1 |
| Q96GL3     | IRF3 protei1 | 99115044   | 1 | 1 | 1 | 49.1  | 6.52  | 41 | 1 |
| Q9Y6D9     | Mitotic spi2 | 92479109   | 1 | 1 | 1 | 83    | 5.92  | 0  | 1 |
| P54725     | UV excisor   | 4.4077135  | 2 | 2 | 2 | 39.6  | 4.58  | 0  | 2 |
| B2RAM2     | cDNA, FLJ9t  | 1.35301353 | 1 | 1 | 1 | 92.6  | 7.65  | 24 | 1 |
| Q5T280     | Putative me2 | 39361702   | 1 | 1 | 1 | 42    | 7.43  | 0  | 1 |
| Q59H81     | BRCA1 assoc  | 1.58227848 | 1 | 1 | 1 | 71.1  | 6.09  | 31 | 1 |
| O43294     | Transformir  | 1.95227766 | 1 | 1 | 1 | 49.8  | 7.03  | 32 | 1 |
| Q9NZT2     | Opioid grov  | 1.47710487 | 1 | 1 | 1 | 73.3  | 4.84  | 34 | 1 |
| Q8ND56     | Protein LSM2 | 1.5982721  | 1 | 1 | 1 | 50.5  | 9.52  | 19 | 1 |
| O75530     | Polycomb pr  | 2.04081633 | 1 | 1 | 1 | 50.2  | 7.03  | 0  | 1 |
| J3KNN5     | Probable A1  | 2.1875     | 1 | 1 | 1 | 71.6  | 7.46  | 0  | 1 |
| Q9HAB8     | Phosphopant  | 2.57234727 | 1 | 1 | 1 | 34    | 6.71  | 32 | 1 |
| Q9NZE8     | 39S ribosom  | 4.78723404 | 1 | 1 | 1 | 21.5  | 11.3  | 0  | 1 |
| Q0PNE2     | Elongator c5 | 63909774   | 1 | 1 | 1 | 29.8  | 6.84  | 0  | 1 |
| O60343     | TBC1 domair  | 0.61633282 | 1 | 1 | 1 | 146.5 | 7.01  | 0  | 1 |
| Q9NZ56     | Formin-2 O   | 0.75493612 | 2 | 3 | 1 | 180   | 5.47  | 34 | 2 |
| B3KW34     | Protein YII3 | 3.50194553 | 1 | 1 | 1 | 28    | 4.36  | 24 | 1 |
| Q13867     | Bleomycin t  | 4.3956044  | 1 | 1 | 1 | 52.5  | 6.27  | 0  | 1 |
| Q4VXZ2     | Vacuolar pr  | 1.65975104 | 1 | 1 | 1 | 82.2  | 5.99  | 17 | 1 |
| P53609     | Geranylger   | 2.3872679  | 1 | 1 | 1 | 42.3  | 6.83  | 0  | 1 |
| Q15031     | Probable l   | 0.88593577 | 1 | 1 | 1 | 101.9 | 8.22  | 32 | 1 |
| Q5GLZ8     | Probable E   | 0.75685904 | 1 | 1 | 1 | 118.5 | 6.19  | 31 | 1 |
| Q9NP73     | Putative bi0 | 96745822   | 1 | 1 | 1 | 126   | 6.74  | 27 | 1 |
| Q5T7S2     | Receptor pr  | 2.98210736 | 1 | 1 | 1 | 55.9  | 7.55  | 0  | 1 |
| Q86WQ0     | Nuclear rec  | 8.63309353 | 1 | 1 | 1 | 15.9  | 6.16  | 0  | 1 |
| AOA024R5U5 | ADAM metall  | 2.00534759 | 1 | 1 | 1 | 84.1  | 7.77  | 0  | 1 |
| Q9Y2S0     | DNA-directt  | 10.5263158 | 1 | 1 | 1 | 15.2  | 5.8   | 0  | 1 |



|            |                     |             |   |   |   |       |       |    |   |
|------------|---------------------|-------------|---|---|---|-------|-------|----|---|
| Q8IYB8     | ATP-depende         | 0.89058524  | 1 | 1 | 1 | 87.9  | 7.99  | 0  | 1 |
| Q8WTS6     | Histone-lys         | 2.18579235  | 1 | 1 | 1 | 40.7  | 4.63  | 0  | 1 |
| O00165     | HCLS1-associ        | 6.09318996  | 2 | 2 | 2 | 31.6  | 4.92  | 34 | 2 |
| Q9Y530     | O-acetyl-AI         | 8.55263158  | 1 | 1 | 1 | 17    | 8.31  | 0  | 1 |
| Q9Y3D5     | 28S ribosom         | 13.3802817  | 1 | 1 | 1 | 15.8  | 9.55  | 0  | 1 |
| Q9NUK0     | Muscleblinc         | 4.23728814  | 2 | 2 | 1 | 38.5  | 8.81  | 0  | 2 |
| A2A2Q9     | Protein AAF         | 5.02512563  | 1 | 1 | 1 | 45    | 7.46  | 0  | 1 |
| AOA087WVA8 | Testis-expr         | 1.06477374  | 1 | 1 | 1 | 125.3 | 6.06  | 23 | 1 |
| Q9BZD4     | Kinetochore         | 2.15517241  | 1 | 1 | 1 | 54.3  | 8.27  | 20 | 1 |
| Q96151     | RCC1-like           | (2.80172414 | 1 | 1 | 1 | 50    | 8.4   | 52 | 1 |
| A8K099     | cDNA FLJ77          | 3.1496063   | 1 | 1 | 1 | 43.1  | 5.85  | 0  | 1 |
| O60333     | Kinesin-li          | 0.44052863  | 1 | 1 | 1 | 204.3 | 5.6   | 25 | 1 |
| Q99598     | Translin-as         | 2.4137931   | 1 | 1 | 1 | 33.1  | 6.55  | 26 | 1 |
| O00115     | Deoxyribom          | 3.05555556  | 1 | 1 | 1 | 39.6  | 8.05  | 0  | 1 |
| P47224     | Guanine nuc         | 8.94308943  | 1 | 1 | 1 | 13.8  | 5.52  | 0  | 1 |
| P19075     | Tetraspani          | 4.21940928  | 1 | 1 | 1 | 26    | 5.6   | 25 | 1 |
| P61009     | Signal pept         | 3.88888889  | 1 | 1 | 1 | 20.3  | 8.62  | 59 | 1 |
| Q59EE8     | Nuclear rec         | 1.61177295  | 1 | 2 | 1 | 155.6 | 7.56  | 20 | 1 |
| Q9NX62     | Inositol m          | 7.24233983  | 1 | 1 | 1 | 38.7  | 6.86  | 0  | 1 |
| B3KUHO     | cDNA FLJ39          | 2.42825607  | 1 | 1 | 1 | 50.9  | 5.35  | 41 | 1 |
| O43491     | Band 4.1-l          | 1.19402985  | 1 | 1 | 1 | 112.5 | 5.44  | 0  | 1 |
| AOA068F7M9 | FH1/FH2 do          | 1.00840336  | 1 | 1 | 1 | 129.2 | 6.37  | 30 | 1 |
| Q92889     | DNA repair          | 1.09170306  | 1 | 1 | 1 | 104.4 | 6.93  | 31 | 1 |
| AOA140VJX5 | Testicular          | 4.45632799  | 2 | 2 | 2 | 62.9  | 8.63  | 0  | 2 |
| P78345     | Ribonucleas         | 2.82685512  | 1 | 1 | 1 | 31.8  | 9.92  | 21 | 1 |
| Q9POW2     | SWI/SNF-rel         | 4.10094637  | 1 | 1 | 1 | 35.8  | 9.35  | 0  | 1 |
| Q9NVI1     | Fanconi an          | 2.48493976  | 2 | 2 | 1 | 149.2 | 6.74  | 18 | 2 |
| Q99081     | Transcripti         | 2.19941349  | 1 | 1 | 1 | 72.9  | 7.02  | 0  | 1 |
| Q9BTX1     | Nucleoporin         | 1.48367953  | 1 | 1 | 1 | 76.3  | 9.09  | 0  | 1 |
| F8WBV6     | Small EDRK          | -10.1851852 | 1 | 1 | 1 | 11.9  | 10.84 | 31 | 1 |
| Q460N5     | Poly [ADP- $\gamma$ | 0.6662965   | 1 | 1 | 1 | 202.7 | 7.18  | 0  | 1 |
| P56385     | ATP synthas         | 10.1449275  | 1 | 1 | 1 | 7.9   | 9.35  | 27 | 1 |
| AOA140VJQ6 | Oxysterol-t         | 1.47255689  | 1 | 1 | 1 | 83.6  | 7.06  | 0  | 1 |
| Q9H8M5     | Metal trans         | 1.14285714  | 1 | 1 | 1 | 96.6  | 6.38  | 33 | 1 |
| Q12894     | Interferon-         | 1.77865613  | 1 | 1 | 1 | 54.8  | 7.94  | 0  | 1 |
| AOA024R6D1 | NIMA (Never         | 1.3278856   | 1 | 2 | 1 | 107.1 | 5.73  | 19 | 1 |
| Q9BW91     | ADP-ribose          | 2.57142857  | 1 | 1 | 1 | 39.1  | 8.22  | 0  | 1 |
| AOA0J9YWLO | Absent in n         | 0.56311591  | 1 | 1 | 1 | 231.6 | 5.81  | 0  | 1 |
| Q8WUX2     | Putative gl         | 8.69565217  | 1 | 1 | 1 | 20.9  | 5.43  | 0  | 1 |
| P82932     | 28S ribosom         | 8           | 1 | 1 | 1 | 14.2  | 9.26  | 0  | 1 |
| Q6FI91     | TSPYL prote         | 5.93607306  | 1 | 1 | 1 | 49.3  | 5.6   | 0  | 1 |
| O95071     | E3 ubiquiti         | 0.46445159  | 1 | 1 | 1 | 309.2 | 5.85  | 0  | 1 |
| Q9UHQ9     | NADH-cyto           | 9.50819672  | 2 | 2 | 2 | 34.1  | 9.38  | 0  | 2 |
| B2RBM1     | cDNA, FLJ9          | 2.48538012  | 2 | 2 | 1 | 76.4  | 4.93  | 39 | 2 |
| AOA087WVC6 | Receptor-ty         | 0.89418778  | 1 | 1 | 1 | 146.5 | 5.62  | 15 | 1 |
| Q9BVW5     | TIMELESS-ir         | 5.64784053  | 1 | 1 | 1 | 34.5  | 4.82  | 0  | 1 |
| Q03169     | Tumor necr          | 2.75229358  | 1 | 1 | 1 | 72.6  | 6.46  | 0  | 1 |
| Q3LIB4     | Putative ur         | 2.06185567  | 1 | 1 | 1 | 63.2  | 6.34  | 0  | 1 |
| Q1HDL3     | HBeAg-bind          | 3.34448161  | 1 | 1 | 1 | 32    | 7.62  | 0  | 1 |
| O95372     | Acyl-protei         | 7.79220779  | 1 | 1 | 1 | 24.7  | 7.23  | 0  | 1 |
| Q9H4L4     | Sentrin-spe         | 1.56794425  | 1 | 1 | 1 | 65    | 8.56  | 39 | 1 |
| A2RRP1     | Neuroblast          | 0.37958667  | 1 | 1 | 1 | 268.4 | 5.96  | 40 | 1 |
| Q9NP61     | ADP-ribosyl         | 2.13178295  | 1 | 1 | 1 | 56.9  | 7.36  | 21 | 1 |
| B2R6F5     | Protein XRI         | 2.28571429  | 1 | 1 | 1 | 39.6  | 5.12  | 0  | 1 |
| Q8IY71     | MRPS17 prot         | 20.4225352  | 1 | 1 | 1 | 15.7  | 9.85  | 0  | 1 |
| Q00403     | Transcripti         | 5.06329114  | 1 | 1 | 1 | 34.8  | 8.35  | 0  | 1 |
| Q5HYI8     | Rab-like p          | 14.66101695 | 1 | 1 | 1 | 26.4  | 7.11  | 0  | 1 |
| P69905     | Hemoglobin          | 8.45070423  | 1 | 1 | 1 | 15.2  | 8.68  | 0  | 1 |
| Q6AI08     | HEAT repeat         | 2.20152413  | 1 | 2 | 1 | 128.7 | 7.03  | 19 | 1 |
| Q5H9R7     | Serine/thr          | 0.80183276  | 1 | 1 | 1 | 97.6  | 4.6   | 39 | 1 |
| A8K2U0     | Alpha-2-mac         | 0.48143054  | 1 | 1 | 1 | 161   | 5.73  | 43 | 1 |
| Q9BSB4     | Autophagy- $\gamma$ | 7.79816514  | 1 | 1 | 1 | 25    | 6.15  | 20 | 1 |
| Q8WUW1     | Protein BR          | 10.6666667  | 1 | 1 | 1 | 8.7   | 5.45  | 0  | 1 |
| P09914     | Interferon-         | 2.09205021  | 1 | 1 | 1 | 55.3  | 7.2   | 0  | 1 |
| Q08722     | Leukocyte           | 2.47678019  | 1 | 1 | 1 | 35.2  | 7.21  | 0  | 1 |
| Q9NV70     | Exocyst con         | 1.11856823  | 1 | 1 | 1 | 101.9 | 6.61  | 0  | 1 |
| P51159     | Ras-relate          | 4.97737557  | 1 | 1 | 1 | 24.9  | 5.22  | 0  | 1 |
| J3KMZ8     | Zinc finger         | 5.18518519  | 1 | 2 | 1 | 45.8  | 6.98  | 0  | 1 |
| E9PRZ1     | Protein SA          | 2.10084034  | 1 | 1 | 1 | 53.8  | 4.54  | 0  | 1 |
| Q68EM7     | Rho GTPase-         | 3.51872872  | 1 | 1 | 1 | 95.4  | 7.62  | 0  | 1 |
| O15231     | Zinc finger         | 1.74165457  | 1 | 1 | 1 | 73.5  | 7.01  | 40 | 1 |
| P29372     | DNA-3-meth          | 3.02013423  | 1 | 1 | 1 | 32.8  | 9.57  | 0  | 1 |
| F8WA39     | Myotubular          | 1.04011887  | 1 | 1 | 1 | 75.7  | 7.39  | 49 | 1 |
| Q8NOU8     | Vitamin K           | 5.68181818  | 1 | 1 | 1 | 19.8  | 9.13  | 0  | 1 |
| Q15746     | Myosin ligh         | 1.61964472  | 2 | 2 | 1 | 210.6 | 6.15  | 46 | 2 |
| AOA0D9SEY1 | Mitogen-act         | 1.28787879  | 1 | 1 | 1 | 151   | 7.58  | 0  | 1 |
| Q02487     | Desmocollin         | 1.10987791  | 1 | 1 | 1 | 99.9  | 5.34  | 29 | 1 |

|            |                      |             |   |   |   |       |       |    |   |
|------------|----------------------|-------------|---|---|---|-------|-------|----|---|
| Q9P1U0     | DNA-director         | 8.73015873  | 1 | 1 | 1 | 13.9  | 5.06  | 0  | 1 |
| Q8IUH3     | RNA-binding          | 1.47058824  | 1 | 1 | 1 | 53.5  | 7.17  | 27 | 1 |
| AOA0G2JPZ2 | Taste receptor       | 2.22929936  | 1 | 1 | 1 | 36.2  | 9.44  | 0  | 1 |
| Q9H0U6     | 39S ribosome         | 5           | 1 | 1 | 1 | 20.6  | 9.54  | 30 | 1 |
| Q5T124     | UBX domain           | 1.73076923  | 1 | 1 | 1 | 57.3  | 5.19  | 0  | 1 |
| P26374     | Rab protein          | 4.11585366  | 1 | 2 | 1 | 74    | 4.93  | 0  | 1 |
| Q7Z7H8     | 39S ribosome         | 3.0651341   | 1 | 1 | 1 | 29.3  | 9.58  | 0  | 1 |
| Q12849     | G-rich sequence      | 1.875       | 1 | 1 | 1 | 53.1  | 6.19  | 20 | 1 |
| P46937     | Transcript           | 2.38095238  | 2 | 2 | 1 | 54.4  | 5.17  | 32 | 2 |
| Q86X83     | COMM domain          | 3.51758794  | 1 | 1 | 1 | 22.7  | 6.73  | 42 | 1 |
| P53803     | DNA-director         | 12.0689655  | 1 | 1 | 1 | 7     | 9.06  | 49 | 1 |
| P48509     | CD151 antigen        | 3.16205534  | 1 | 1 | 1 | 28.3  | 7.47  | 0  | 1 |
| E7EV07     | Rho guanine          | 0.49559471  | 1 | 1 | 1 | 198.1 | 6.57  | 33 | 1 |
| Q9UHL4     | Dipeptide            | 1.62601626  | 1 | 1 | 1 | 54.3  | 6.32  | 21 | 1 |
| AOA024R3M1 | Thymocyte            | 16.6666667  | 1 | 1 | 1 | 25.7  | 9.25  | 0  | 1 |
| Q7L8L6     | FAST kinase          | 1.30890052  | 1 | 1 | 1 | 86.5  | 8.13  | 0  | 1 |
| B2R694     | Terpene cyclase      | 1.36612022  | 1 | 1 | 1 | 83.4  | 6.61  | 30 | 1 |
| Q96HA7     | Tonsoku-like         | 0.87082729  | 1 | 1 | 1 | 150.8 | 6.42  | 0  | 1 |
| Q7LGA3     | Heparan sulfate      | 2.80898876  | 1 | 1 | 1 | 41.9  | 8.69  | 0  | 1 |
| B2RD30     | cDNA, FLJ96          | 2.82131661  | 1 | 1 | 1 | 36.6  | 6.61  | 31 | 1 |
| Q96KG9     | N-terminal           | 1.36138614  | 1 | 1 | 1 | 89.6  | 6.3   | 36 | 1 |
| Q13510     | Acid ceramide        | 5.82278481  | 1 | 1 | 1 | 44.6  | 7.62  | 0  | 1 |
| Q96CM8     | Acyl-CoA synthase    | 1.95121951  | 1 | 1 | 1 | 68.1  | 7.55  | 29 | 1 |
| B2R4N3     | cDNA, FLJ96          | 19.1780822  | 1 | 1 | 1 | 8.5   | 7.28  | 0  | 1 |
| Q8WUK0     | Phosphatidyl         | 3.48258706  | 1 | 1 | 1 | 22.8  | 9.77  | 0  | 1 |
| O75787     | Renin receptor       | 2.28571429  | 1 | 1 | 1 | 39    | 6.1   | 0  | 1 |
| Q9H3G5     | Probable secretase   | 1.68067227  | 1 | 1 | 1 | 54.1  | 5.62  | 28 | 1 |
| L8EC67     | Alternative          | 17.8571429  | 1 | 2 | 1 | 6.5   | 8.88  | 0  | 1 |
| AOA024R3L9 | Vacuolar protein     | 3.57142857  | 1 | 1 | 1 | 39.1  | 7.36  | 0  | 1 |
| Q6NVY1     | 3-hydroxyisovalerate | 1.8134715   | 1 | 1 | 1 | 43.5  | 8.19  | 32 | 1 |
| Q9BQS8     | FYVE and coiled-coil | 0.60893099  | 1 | 1 | 1 | 166.9 | 4.92  | 0  | 1 |
| Q9NSG2     | Uncharacterized      | 2.22743259  | 1 | 1 | 1 | 96.5  | 6     | 0  | 1 |
| P46089     | G-protein coupled    | 7.87878788  | 1 | 1 | 1 | 35    | 8.06  | 0  | 1 |
| Q86UE3     | Zinc finger          | 2.63157895  | 2 | 2 | 2 | 98.3  | 8.6   | 0  | 2 |
| Q13439     | Golgin subfamily     | 0.35874439  | 1 | 1 | 1 | 261   | 5.39  | 26 | 1 |
| Q12972     | Nuclear import       | 6.26780627  | 2 | 2 | 2 | 38.5  | 7.37  | 0  | 2 |
| Q96JJ7     | Protein disulfide    | 3.08370044  | 1 | 1 | 1 | 51.8  | 4.91  | 0  | 1 |
| Q8IV50     | LysM and putative    | 6.97674419  | 2 | 2 | 1 | 23.4  | 5.35  | 0  | 2 |
| Q9UNZ5     | Leydig cell          | 17.07070707 | 1 | 1 | 1 | 10.6  | 11.55 | 0  | 1 |
| Q59E89     | DnaJ (Hsp40)         | 2.90697674  | 1 | 1 | 1 | 38.6  | 8.66  | 32 | 1 |
| Q9BUK6     | Protein missing      | 1.22807018  | 1 | 1 | 1 | 61.8  | 6.11  | 38 | 1 |
| Q9HOJ9     | Poly [ADP-ribose]    | 2.56776034  | 1 | 1 | 1 | 79    | 8.51  | 0  | 1 |
| S4R347     | Formin-binding       | 1.47783251  | 1 | 1 | 1 | 70.5  | 6.64  | 28 | 1 |
| P30260     | Cell division        | 1.21359223  | 1 | 1 | 1 | 91.8  | 7.02  | 0  | 1 |
| Q9H7N4     | Splicing factor      | 0.83841463  | 1 | 1 | 1 | 139.2 | 9.25  | 0  | 1 |
| Q8IXM3     | 39S ribosome         | 10.9489051  | 1 | 1 | 1 | 15.4  | 9.57  | 0  | 1 |
| D3DUP1     | WNK lysine           | 0.58774139  | 1 | 1 | 1 | 250.6 | 6.34  | 29 | 1 |
| P00734     | Prothrombin          | 2.89389068  | 1 | 1 | 1 | 70    | 5.9   | 0  | 1 |
| Q96CW6     | Probable Rho         | 3.88349515  | 1 | 1 | 1 | 35    | 4.6   | 20 | 1 |
| O60563     | Cyclin-T1            | 0.96418733  | 1 | 1 | 1 | 80.6  | 8.78  | 22 | 1 |
| B2RB70     | Neurocalcin          | 4.14507772  | 1 | 1 | 1 | 22.2  | 5.35  | 36 | 1 |
| Q9H201     | Epsin-3 OS           | 1.89873418  | 1 | 1 | 1 | 68.2  | 5.91  | 0  | 1 |
| Q9NR19     | Acetyl-coenzyme      | 1.28388017  | 1 | 1 | 1 | 78.5  | 6.46  | 0  | 1 |
| Q86W56     | Poly (ADP-ribose)    | 1.12704918  | 1 | 1 | 1 | 111   | 6.43  | 0  | 1 |
| Q9NVC6     | Mediator of          | 1.68970814  | 1 | 1 | 1 | 72.8  | 7.44  | 0  | 1 |
| Q96HA1     | Nuclear envelope     | 0.88070456  | 1 | 1 | 1 | 127.6 | 10.56 | 23 | 1 |
| B2R6X8     | cDNA, FLJ96          | 1.77133655  | 1 | 1 | 1 | 67.6  | 8.06  | 22 | 1 |
| Q9NX74     | tRNA-dihydroxy       | 2.43407708  | 1 | 1 | 1 | 55    | 7.11  | 17 | 1 |
| AOA087WZV9 | D-tyrosyl            | 14.93273543 | 1 | 1 | 1 | 25.3  | 9.04  | 31 | 1 |
| Q9P2D3     | HEAT repeat          | 0.67600193  | 1 | 1 | 1 | 224.2 | 7.17  | 0  | 1 |
| P07711     | Cathepsin I          | 4.2042042   | 1 | 1 | 1 | 37.5  | 5.45  | 0  | 1 |
| P00918     | Carbonic anhydrase   | 3.84615385  | 1 | 1 | 1 | 29.2  | 7.4   | 0  | 1 |
| Q9Y2R0     | Cytochrome           | 8.49056604  | 1 | 1 | 1 | 11.7  | 9.6   | 22 | 1 |
| Q04759     | Protein kinase       | 1.41643059  | 1 | 1 | 1 | 81.8  | 7.61  | 0  | 1 |
| Q68CN5     | Putative uridine     | 0.78328982  | 1 | 1 | 1 | 126.9 | 7.24  | 0  | 1 |
| Q6KC79     | Nipped-B-like        | 0.39229672  | 1 | 1 | 1 | 315.9 | 7.91  | 25 | 1 |
| Q9NRG4     | N-lysine methyl      | 1.84757506  | 1 | 1 | 1 | 49.7  | 6.71  | 0  | 1 |
| B2R8D1     | cDNA, FLJ96          | 2.14067278  | 1 | 1 | 1 | 35.9  | 7.74  | 0  | 1 |
| AOA0G2JNU3 | Transcript           | 0.3429878   | 1 | 1 | 1 | 293.7 | 5.11  | 0  | 1 |
| O14561     | Acyl carrier         | 11.5384615  | 1 | 1 | 1 | 17.4  | 4.93  | 0  | 1 |
| A8K940     | cDNA FLJ776          | 1.13314448  | 1 | 1 | 1 | 112.2 | 7.3   | 19 | 1 |
| P43003     | Excitatory           | 2.21402214  | 1 | 1 | 1 | 59.5  | 8.41  | 0  | 1 |
| AOA024QZM3 | Eukaryotic           | 11.6666667  | 1 | 1 | 1 | 12.9  | 6.67  | 36 | 1 |
| O60645     | Exocyst complex      | 3.7037037   | 1 | 2 | 1 | 86.8  | 6.11  | 0  | 1 |
| Q8IVF2     | Protein AHR          | 1.32873167  | 1 | 1 | 1 | 616.2 | 5.36  | 0  | 1 |
| B2R506     | Transcript           | 13.7614679  | 1 | 1 | 1 | 12.5  | 7.96  | 0  | 1 |
| Q13887     | Krueppel-like        | 6.56455142  | 1 | 1 | 1 | 50.8  | 8.6   | 0  | 1 |

|            |                        |   |   |   |        |       |    |   |
|------------|------------------------|---|---|---|--------|-------|----|---|
| P26885     | Peptidyl-pr14.22535211 | 1 | 1 | 1 | 15.6   | 9.13  | 33 | 1 |
| Q8N523     | Tuftelin-ir1.19474313  | 1 | 1 | 1 | 96.7   | 5.67  | 0  | 1 |
| P04150     | Glucocortic1.67310167  | 1 | 1 | 1 | 85.6   | 6.38  | 27 | 1 |
| Q9BRT9     | DNA replicæ6.27802691  | 1 | 1 | 1 | 26     | 4.98  | 0  | 1 |
| Q96159     | Probable as1.88679245  | 1 | 1 | 1 | 54.1   | 7.24  | 23 | 1 |
| A4D1V4     | Mitochondri5.31914894  | 1 | 1 | 1 | 21.4   | 9.73  | 17 | 1 |
| Q86Y82     | Syntaxin-127.97101449  | 1 | 1 | 1 | 31.6   | 5.59  | 0  | 1 |
| Q9H7D0     | Dedicator c1.65775401  | 1 | 1 | 1 | 215.2  | 7.96  | 0  | 1 |
| Q53EQ6     | Tigger trar0.93457944  | 1 | 1 | 1 | 69.2   | 8.41  | 42 | 1 |
| Q9UNQ2     | Probable dj2.55591054  | 1 | 1 | 1 | 35.2   | 9.99  | 31 | 1 |
| MOR3A8     | PIH1 domair 5.2173913  | 1 | 1 | 1 | 12.6   | 5.05  | 48 | 1 |
| Q86W50     | Methyltrans1.95729537  | 1 | 1 | 1 | 63.6   | 7.85  | 0  | 1 |
| AOA0D9SF60 | Plakophilin1.40728477  | 1 | 1 | 1 | 133.9  | 9.09  | 0  | 1 |
| C9JCC6     | Dr1-associæ5.66037736  | 1 | 1 | 1 | 23.2   | 5.27  | 0  | 1 |
| P61626     | Lysozyme C 6.08108108  | 1 | 1 | 1 | 16.5   | 9.16  | 0  | 1 |
| Q6ZT12     | E3 ubiquiti0.63559322  | 1 | 1 | 1 | 212.3  | 6.1   | 23 | 1 |
| P63272     | Transcripti13.6752137  | 1 | 1 | 1 | 13.2   | 8.06  | 0  | 1 |
| O75935     | Dynactin st4.83870968  | 1 | 1 | 1 | 21.1   | 5.47  | 31 | 1 |
| B7ZMD2     | ZBBX protei0.83432658  | 1 | 1 | 1 | 95.7   | 5.64  | 0  | 1 |
| O43676     | NADH dehyd8.16326531   | 1 | 1 | 1 | 11.4   | 9.2   | 0  | 1 |
| Q70UQ0     | Inhibitor c 2          | 1 | 1 | 1 | 39.3   | 9.17  | 0  | 1 |
| Q9POJ7     | E3 ubiquiti3.41207349  | 1 | 1 | 1 | 41.9   | 5.66  | 0  | 1 |
| Q9H6K4     | Optic atro16.7597765   | 1 | 4 | 1 | 20     | 8.91  | 0  | 1 |
| Q9H9B1     | Histone-lys1.15562404  | 1 | 1 | 1 | 141.4  | 5.76  | 0  | 1 |
| Q02447     | Transcripti2.17669654  | 1 | 1 | 1 | 81.9   | 5.26  | 0  | 1 |
| Q96R06     | Sperm-assoc1.08968986  | 1 | 1 | 1 | 134.3  | 5     | 0  | 1 |
| Q86WN1     | F-BAR and c1.44927536  | 1 | 1 | 1 | 76.9   | 5.34  | 0  | 1 |
| Q9NNX1     | Tuftelin O52.56410256  | 1 | 1 | 1 | 44.2   | 6     | 0  | 1 |
| I3L1Q2     | B-cell CLL/4.09556314  | 1 | 1 | 1 | 32.8   | 6.46  | 0  | 1 |
| AOA0C4DG91 | Nucleoside 7.21649485  | 1 | 1 | 1 | 22     | 7.96  | 0  | 1 |
| O43318     | Mitogen-act11.15511551 | 1 | 1 | 1 | 67.2   | 7.11  | 0  | 1 |
| Q99732     | Lipopolysac4.34782609  | 1 | 1 | 1 | 17.1   | 6.44  | 0  | 1 |
| B2R6D4     | Phosphomam3.25203252   | 1 | 1 | 1 | 28     | 6.77  | 0  | 1 |
| Q5VWZ2     | Lysophosphc2.53164557  | 1 | 1 | 1 | 26.3   | 7.84  | 36 | 1 |
| A8K5A6     | cDNA FLJ7681.65898618  | 1 | 1 | 1 | 122.3  | 6.47  | 0  | 1 |
| Q969G6     | Riboflavin 7.09677419  | 1 | 1 | 1 | 17.6   | 8.13  | 0  | 1 |
| BOYIZ2     | Heat shock 5.6         | 1 | 1 | 1 | 27     | 7.28  | 0  | 1 |
| Q86WA6     | Valacyclovi4.81099656  | 1 | 1 | 1 | 32.5   | 9.14  | 0  | 1 |
| Q14197     | Peptidyl-tf 7.2815534  | 1 | 1 | 1 | 23.6   | 10.07 | 26 | 1 |
| Q9Y5B6     | PAX3- and F1.09051254  | 1 | 1 | 1 | 104.7  | 5.68  | 0  | 1 |
| O95180     | Voltage-dep1.48746281  | 1 | 1 | 1 | 259    | 7.37  | 0  | 1 |
| Q9UBH6     | Xenotropic 3.59195402  | 1 | 1 | 1 | 81.5   | 8.44  | 0  | 1 |
| O60888     | Protein Cut10.0558659  | 1 | 1 | 1 | 19.1   | 5.5   | 0  | 1 |
| A4DOP7     | Origin recc1.83908046  | 1 | 1 | 1 | 50.3   | 7.74  | 0  | 1 |
| Q8N8A6     | ATP-dependæ1.05105105  | 1 | 1 | 1 | 72.4   | 8.16  | 33 | 1 |
| B7WPL0     | Synembryn-f4.28571429  | 1 | 6 | 1 | 63.5   | 5.41  | 0  | 1 |
| Q96JB2     | Conserved c1.44927536  | 1 | 1 | 1 | 94     | 5.57  | 0  | 1 |
| Q9P253     | Vacuolar pr1.54162384  | 1 | 1 | 1 | 110.1  | 6.07  | 0  | 1 |
| Q09MP3     | RAD51-assoc2.76100086  | 1 | 1 | 1 | 133.8  | 7.34  | 0  | 1 |
| Q9Y3S2     | Zinc finger 2.5        | 1 | 1 | 1 | 36.2   | 6.16  | 0  | 1 |
| P61599     | N-alpha-acæ8.42696629  | 1 | 1 | 1 | 20.4   | 5.03  | 0  | 1 |
| Q9H1I8     | Activating 2.11360634  | 1 | 1 | 1 | 86.3   | 5.16  | 27 | 1 |
| AOA087WT30 | Uncharacter3.79146919  | 1 | 1 | 1 | 23.1   | 4.98  | 0  | 1 |
| Q16098     | APC proteir25.6410256  | 1 | 1 | 1 | 4.6    | 5.26  | 0  | 1 |
| Q99679     | Probable G-5.73065903  | 1 | 1 | 1 | 39.5   | 7.71  | 0  | 1 |
| Q8IYW2     | Cilia- and 0.51565378  | 1 | 1 | 1 | 303.3  | 7.36  | 0  | 1 |
| Q9POH9     | RER1 protei3.73831776  | 1 | 1 | 1 | 24.8   | 9.63  | 32 | 1 |
| O95251     | Histone acæ1.80032733  | 1 | 1 | 1 | 70.6   | 8.85  | 0  | 1 |
| B2R6I5     | cDNA, FLJ925.0955414   | 1 | 1 | 1 | 17.4   | 5.12  | 37 | 1 |
| A4D1L5     | Ubiquitin-c3.82513661  | 1 | 1 | 1 | 20.6   | 4.67  | 0  | 1 |
| U3KQP8     | Mitochondri7.25806452  | 1 | 1 | 1 | 14.6   | 8.84  | 0  | 1 |
| Q9GZR2     | RNA exonucl1.8957346   | 1 | 1 | 1 | 46.6   | 9.77  | 0  | 1 |
| Q9UHG3     | Prenylcyste2.37623762  | 1 | 1 | 1 | 56.6   | 6.18  | 0  | 1 |
| Q9P265     | Disco-inter0.50761421  | 1 | 1 | 1 | 171.4  | 8.09  | 38 | 1 |
| Q8NF91     | Nesprin-1 (0.15914516  | 1 | 1 | 1 | 1010.5 | 5.53  | 0  | 1 |
| Q6FGZ3     | EPHX1 prote1.75824176  | 1 | 1 | 1 | 52.9   | 7.25  | 0  | 1 |
| B3KWH9     | Elongation 2.00668896  | 1 | 1 | 1 | 35.3   | 9.41  | 39 | 1 |
| Q8TAE8     | Growth arre5.40540541  | 1 | 1 | 1 | 25.4   | 10.02 | 0  | 1 |
| Q9NW08     | DNA-directæ1.23565755  | 1 | 1 | 1 | 127.7  | 8.5   | 18 | 1 |
| H7C3E3     | Myosin regu10.2803738  | 1 | 1 | 1 | 11.8   | 9.32  | 0  | 1 |
| Q15648     | Mediator of 0.8855155  | 1 | 1 | 1 | 168.4  | 8.73  | 0  | 1 |
| Q7Z6W1     | Transmembræ5.49450549  | 1 | 1 | 1 | 20.1   | 8.68  | 0  | 1 |
| P61962     | DDB1- and (3.21637427  | 1 | 1 | 1 | 38.9   | 5.52  | 17 | 1 |
| Q8IYI6     | Exocyst con2.20689655  | 1 | 1 | 1 | 81.7   | 5.49  | 0  | 1 |
| A6NGQ3     | Obscurin O5 0.1681049  | 1 | 1 | 1 | 972.4  | 5.99  | 0  | 1 |
| Q14691     | DNA replicæ4.08163265  | 1 | 1 | 1 | 23     | 7.39  | 0  | 1 |
| Q9COD5     | Protein TAN0.59108006  | 1 | 1 | 1 | 202.1  | 8.32  | 0  | 1 |

|            |                        |   |   |   |       |      |    |   |
|------------|------------------------|---|---|---|-------|------|----|---|
| Q6SPF0     | Atherin OS=2.04460967  | 1 | 1 | 1 | 56    | 7.58 | 0  | 1 |
| P35712     | Transcripti1.57004831  | 1 | 1 | 1 | 91.9  | 7.78 | 0  | 1 |
| Q5VW36     | Focadhesin 0.38867296  | 1 | 1 | 1 | 199.9 | 6.62 | 0  | 1 |
| F8WBJ4     | E3 ubiquiti27.9569892  | 1 | 2 | 1 | 8.8   | 9.29 | 0  | 1 |
| E5KTI5     | Endonuclea2.88461538   | 1 | 1 | 1 | 34.4  | 9.67 | 28 | 1 |
| Q9H9L3     | Interferon-2.26628895  | 1 | 1 | 1 | 39.1  | 9.94 | 0  | 1 |
| Q9BTZ2     | Dehydrogen2.51798561   | 1 | 1 | 1 | 29.5  | 8.56 | 0  | 1 |
| Q9NRW7     | Vacuolar pr1.57894737  | 1 | 1 | 1 | 65    | 8.24 | 21 | 1 |
| D6RI06     | OTU domain-1.88172043  | 1 | 1 | 1 | 42.1  | 7.55 | 0  | 1 |
| P05091     | Aldehyde de3.28820116  | 1 | 1 | 1 | 56.3  | 7.05 | 0  | 1 |
| Q8NC96     | Adaptin ear2.18181818  | 1 | 1 | 1 | 29.7  | 6.8  | 40 | 1 |
| Q9BT22     | Chitobiosyl 3.6637931  | 1 | 1 | 1 | 52.5  | 7.23 | 0  | 1 |
| HOY9L3     | Marginal zc36.6666667  | 1 | 1 | 1 | 6.4   | 5.62 | 0  | 1 |
| Q8WVQ1     | Soluble call.49625935  | 1 | 1 | 1 | 44.8  | 6.09 | 32 | 1 |
| O75578     | Integrin a10.51413882  | 1 | 1 | 1 | 127.5 | 6.68 | 0  | 1 |
| Q9NV56     | MRG/MORF4L-4.41176471  | 1 | 1 | 1 | 22.4  | 5.83 | 37 | 1 |
| Q96RV3     | Pecanex-li10.25630073  | 1 | 1 | 1 | 258.5 | 7.21 | 42 | 1 |
| B2RDY3     | Katanin p6(2.24489796  | 1 | 1 | 1 | 55.4  | 7.02 | 0  | 1 |
| Q92947     | Glutaryl-Cc2.73972603  | 1 | 1 | 1 | 48.1  | 8.06 | 0  | 1 |
| Q9Y5B0     | RNA polymer0.93652445  | 1 | 1 | 1 | 104.3 | 5.27 | 0  | 1 |
| O15120     | 1-acyl-sn-2.87769784   | 1 | 1 | 1 | 30.9  | 9.01 | 0  | 1 |
| P49914     | 5-formylte14.43349754  | 1 | 1 | 1 | 23.2  | 7.88 | 0  | 1 |
| Q9H081     | Protein M13.90243902   | 1 | 1 | 1 | 24.1  | 5.69 | 19 | 1 |
| Q8WZA0     | Protein LZ15.78947368  | 1 | 1 | 1 | 21.5  | 4.94 | 0  | 1 |
| Q9NVK5     | FGFR1 onco10.2766798   | 1 | 1 | 1 | 29.4  | 6    | 0  | 1 |
| B4DN86     | cDNA FLJ56(1.37566138  | 1 | 1 | 1 | 101.4 | 5    | 33 | 1 |
| Q9Y5Q8     | General trc1.92678227  | 1 | 1 | 1 | 59.5  | 6.9  | 0  | 1 |
| Q9Y618     | Nuclear rec0.35643564  | 1 | 1 | 1 | 274.6 | 7.59 | 22 | 1 |
| B4EOD0     | cDNA FLJ61(1.23647604  | 1 | 1 | 1 | 75    | 9.1  | 0  | 1 |
| HOYEP9     | BRCA2-inter6.28930818  | 1 | 1 | 1 | 16.9  | 7.2  | 0  | 1 |
| AOA0S2Z3R6 | Laminin bet11.02389078 | 1 | 1 | 1 | 129.5 | 7.21 | 0  | 1 |
| O43506     | Disintegrin1.51515152  | 1 | 1 | 1 | 81.5  | 6.48 | 0  | 1 |
| Q8NBJ4     | Golgi memb1.2.9925187  | 1 | 1 | 1 | 45.3  | 4.97 | 0  | 1 |
| AOA024R5F7 | 7-dehydrochl1.26315789 | 1 | 1 | 1 | 54.5  | 8.7  | 0  | 1 |
| Q9BRJ6     | Uncharacter6.18556701  | 1 | 1 | 1 | 22.1  | 9.64 | 0  | 1 |
| B4DUE4     | cDNA FLJ6141.08527132  | 1 | 1 | 1 | 71    | 5.58 | 0  | 1 |
| Q9GZS1     | DNA-directe1.87110187  | 1 | 1 | 1 | 53.9  | 8.56 | 0  | 1 |
| Q6PIW4     | Fidgetin-lil1.03857567 | 1 | 1 | 1 | 74    | 7.85 | 0  | 1 |
| Q4V339     | COBW domain1.51898734  | 1 | 1 | 1 | 43.9  | 4.87 | 42 | 1 |
| P52179     | Myomesin-1 2.31454006  | 1 | 6 | 1 | 187.5 | 6.93 | 0  | 1 |
| AOA024R978 | Chromosome 1.40086207  | 1 | 1 | 1 | 103.1 | 4.78 | 0  | 1 |
| Q9UIJ7     | GTP:AMP phc4.40528634  | 1 | 1 | 1 | 25.6  | 9.16 | 0  | 1 |
| AOA087X2A7 | Protein FAM0.63752277  | 1 | 1 | 1 | 128.4 | 5.82 | 0  | 1 |
| Q8TAE7     | Potassium v2.98165138  | 1 | 1 | 1 | 49.6  | 8.25 | 0  | 1 |
| Q9Y657     | Spindlin-1 6.48854962  | 1 | 1 | 1 | 29.6  | 6.96 | 0  | 1 |
| Q6PJ73     | DPF1 protei5.07246377  | 1 | 1 | 1 | 47.5  | 8.1  | 0  | 1 |
| P20248     | Cyclin-A2 (1.62037037  | 1 | 1 | 1 | 48.5  | 6.54 | 0  | 1 |
| HOYET5     | EGF-contair13.7362637  | 1 | 1 | 1 | 19.7  | 6.32 | 0  | 1 |
| Q96G75     | Protein RMI3.56234097  | 1 | 1 | 1 | 44.4  | 6.61 | 28 | 1 |
| Q17RY6     | Lymphocyte 3.63636364  | 1 | 1 | 1 | 18.7  | 7.43 | 0  | 1 |
| Q96EX3     | WD repeat-c2.42537313  | 1 | 1 | 1 | 57.8  | 6.64 | 0  | 1 |
| P33981     | Dual specifi1.16686114 | 1 | 1 | 1 | 97    | 8.16 | 22 | 1 |
| Q8WW22     | DnaJ homolc3.02267003  | 1 | 1 | 1 | 44.8  | 7.59 | 0  | 1 |
| Q5T751     | Late cornif28.8135593  | 1 | 1 | 1 | 11.5  | 8.37 | 0  | 1 |
| Q14696     | LDLR chaper2.56410256  | 1 | 1 | 1 | 26.1  | 7.78 | 39 | 1 |
| AOA090N8E9 | Enhancer of0.79893475  | 1 | 1 | 1 | 86    | 7.21 | 0  | 1 |
| Q9Y2H0     | Disks largc3.02419355  | 1 | 1 | 1 | 107.9 | 7.08 | 0  | 1 |
| AOA087X211 | Protein C1H0.99337748  | 1 | 1 | 1 | 102.2 | 6.23 | 24 | 1 |
| O95996     | Adenomatous0.47763786  | 1 | 1 | 1 | 243.8 | 8.82 | 0  | 1 |
| Q15382     | GTP-binding3.80434783  | 1 | 1 | 1 | 20.5  | 5.92 | 31 | 1 |
| P12107     | Collagen a10.49833887  | 1 | 1 | 1 | 181   | 5.17 | 0  | 1 |
| Q8WUA2     | Peptidyl-pr3.45528455  | 1 | 1 | 1 | 57.2  | 5.92 | 0  | 1 |
| Q8IWW8     | E3 ubiquiti0.45584046  | 1 | 1 | 1 | 200.4 | 6.24 | 0  | 1 |
| Q9BVT8     | Transmembr4.87804878   | 1 | 1 | 1 | 26.2  | 5.72 | 0  | 1 |
| Q9NYZ3     | G2 and S pl1.38888889  | 1 | 1 | 1 | 76.6  | 9.39 | 0  | 1 |
| Q687X5     | Metallored2.17864924   | 1 | 1 | 1 | 51.9  | 9.29 | 0  | 1 |
| Q9BVV6     | Protein TAI 1.1741683  | 1 | 1 | 1 | 169.2 | 5.54 | 0  | 1 |
| AOA1BOGW05 | Probable C-2.54010695  | 1 | 1 | 1 | 84.5  | 9.25 | 0  | 1 |
| O43879     | Olfactory r7.87037037  | 1 | 1 | 1 | 23.5  | 7.84 | 0  | 1 |
| Q96CN7     | Isochorismc2.01342282  | 1 | 1 | 1 | 32.2  | 7.39 | 37 | 1 |
| Q9NQS1     | Cell death 1.93370166  | 1 | 1 | 1 | 38.5  | 4.98 | 0  | 1 |
| A8K333     | cDNA FLJ75(2.35546039  | 1 | 1 | 1 | 50.4  | 8.75 | 0  | 1 |
| AOA087WYF7 | MICOS compl 5.2238806  | 1 | 1 | 1 | 29.2  | 9.45 | 0  | 1 |
| Q96NL6     | Sodium char2.18023256  | 1 | 1 | 1 | 80.9  | 6.07 | 0  | 1 |
| Q96D71     | RalBP1-assc0.75376884  | 1 | 1 | 1 | 86.6  | 5.69 | 0  | 1 |
| G5EA09     | Syndecan bil1.88679245 | 1 | 1 | 1 | 34.8  | 8.51 | 0  | 1 |
| R4GMX8     | Ran-binding0.92307692  | 1 | 1 | 1 | 70.4  | 6.87 | 28 | 1 |

|            |              |                       |   |   |   |       |       |    |   |
|------------|--------------|-----------------------|---|---|---|-------|-------|----|---|
| Q9BUV8     | Uncharacteri | 4.37956204            | 1 | 1 | 1 | 15.5  | 5.2   | 30 | 1 |
| Q96PX1     | RING finger  | 0.88365243            | 1 | 1 | 1 | 73.5  | 4.7   | 0  | 1 |
| P68106     | Peptidyl-p   | 12.037037             | 1 | 1 | 1 | 11.8  | 8.47  | 0  | 1 |
| J3KSU8     | Dymeclin (   | 6.55737705            | 1 | 1 | 1 | 14.1  | 9.39  | 0  | 1 |
| Q13111     | Chromatin    | $\epsilon$ 0.83682008 | 1 | 1 | 1 | 106.9 | 5.94  | 0  | 1 |
| Q5JTC6     | APC membra   | 0.52863436            | 1 | 1 | 1 | 124   | 4.84  | 36 | 1 |
| H0UI80     | Negative el  | 4.0066778             | 1 | 1 | 1 | 67.3  | 5.21  | 0  | 1 |
| P49247     | Ribose-5-ph  | 2.57234727            | 1 | 1 | 1 | 33.2  | 8.54  | 26 | 1 |
| B1AKK2     | Dimethylar   | 4.9122807             | 1 | 1 | 1 | 31.1  | 5.81  | 0  | 1 |
| Q7Z3B4     | Nucleoporin  | 2.36686391            | 1 | 1 | 1 | 55.4  | 7.02  | 0  | 1 |
| P30291     | Weel-like p  | 1.85758514            | 1 | 1 | 1 | 71.6  | 6.77  | 20 | 1 |
| Q5UIP0     | Telomere-as  | 0.24271845            | 1 | 1 | 1 | 274.3 | 5.52  | 43 | 1 |
| Q9UL49     | Transcripti  | 3.4                   | 1 | 2 | 1 | 52.7  | 6.84  | 0  | 1 |
| Q6PJ53     | Uncharacteri | 2.48962656            | 1 | 1 | 1 | 25.8  | 8.69  | 0  | 1 |
| AOA024R7V7 | Chromodomai  | 0.49817336            | 1 | 1 | 1 | 337.4 | 6.42  | 0  | 1 |
| Q9UHP3     | Ubiquitin c  | 0.56872038            | 1 | 1 | 1 | 122.1 | 5.34  | 35 | 1 |
| A6NC98     | Coiled-coil  | 1.82926829            | 1 | 1 | 1 | 164.7 | 5.11  | 0  | 1 |
| P53804     | E3 ubiquiti  | 0.69135802            | 1 | 1 | 1 | 229.7 | 7.52  | 0  | 1 |
| Q9BPX5     | Actin-relat  | 4.5751634             | 1 | 1 | 1 | 16.9  | 6.6   | 0  | 1 |
| Q9Y227     | Ectonucleos  | 1.2987013             | 1 | 1 | 1 | 70.2  | 8.29  | 0  | 1 |
| Q6ZNL1     | FLJ00283 p   | 1.2                   | 1 | 1 | 1 | 51.7  | 8.32  | 47 | 1 |
| H7BZT1     | Splicing fe  | 4.5                   | 1 | 1 | 1 | 21.1  | 11.56 | 0  | 1 |
| Q9HB84     | MLL protei   | 20.9677419            | 1 | 1 | 1 | 7     | 9.99  | 0  | 1 |
| Q9GZP4     | PITH domai   | 5.68720379            | 1 | 1 | 1 | 24.2  | 5.74  | 0  | 1 |
| F5H114     | Pleckstrin   | 19.1780822            | 1 | 1 | 1 | 16.8  | 8.21  | 0  | 1 |
| A6NFE2     | Single-pas   | 3.20699708            | 1 | 1 | 1 | 39.5  | 4.86  | 0  | 1 |
| H3BSK5     | Signal-reg   | 19.0839695            | 1 | 6 | 1 | 14.7  | 6.92  | 0  | 1 |
| Q8IUA7     | ATP-binding  | 0.49261084            | 1 | 1 | 1 | 184.2 | 6.93  | 32 | 1 |
| Q8IYL3     | UPF0688 pr   | 7.40740741            | 1 | 1 | 1 | 26    | 6.9   | 24 | 1 |
| Q96N67     | Dedicator c  | 1.1682243             | 1 | 1 | 1 | 242.4 | 6.8   | 0  | 1 |
| B4DHG8     | Kinesin-li   | 1.79063361            | 1 | 1 | 1 | 82.8  | 6.44  | 0  | 1 |
| O14617     | AP-3 compl   | 2.16825672            | 1 | 1 | 1 | 130.1 | 8.48  | 0  | 1 |
| AOA1L5BXV2 | Receptor e   | 5.97826087            | 1 | 1 | 1 | 20.7  | 8.56  | 0  | 1 |
| Q6ZSZ5     | Rho guanine  | 0.51150895            | 1 | 1 | 1 | 130.7 | 7.08  | 0  | 1 |
| A7KAX9     | Rho GTPase   | -0.47915668           | 1 | 1 | 1 | 230.4 | 6.74  | 0  | 1 |
| Q9POK7     | Ankyr corbi  | n 0.6122449           | 1 | 1 | 1 | 110   | 6.21  | 0  | 1 |
| Q7Z4X0     | MO25-like    | p 3.51906158          | 1 | 1 | 1 | 39.7  | 7.47  | 0  | 1 |
| O43240     | Kallikrein   | -2.53623188           | 1 | 1 | 1 | 30.2  | 8.59  | 0  | 1 |
| Q9Y2Z9     | Ubiquinone   | 1.70940171            | 1 | 1 | 1 | 50.8  | 7.3   | 0  | 1 |
| AOA024RDV9 | Spastic par  | 2.4024024             | 1 | 1 | 1 | 72.8  | 5.91  | 0  | 1 |
| P58004     | Sestrin-2    | (2.08333333           | 1 | 1 | 1 | 54.5  | 5.9   | 0  | 1 |
| HOYBS0     | Ankyrin-1    | (0.67307692           | 1 | 1 | 1 | 115.8 | 5.77  | 0  | 1 |
| HOYK64     | CREB-regul   | e 7.36842105          | 1 | 1 | 1 | 20.5  | 7.68  | 0  | 1 |
| Q6UW63     | KDEL motif   | -2.58964143           | 1 | 1 | 1 | 58    | 7.71  | 0  | 1 |
| A8K818     | cDNA FLJ7    | 572.15686275          | 1 | 1 | 1 | 54.9  | 8.19  | 0  | 1 |
| O95141     | Putative ur  | 3.02114804            | 1 | 1 | 1 | 35.8  | 10.71 | 0  | 1 |
| S4R441     | Transmembr   | e 13.6842105          | 1 | 1 | 1 | 10.6  | 9.76  | 0  | 1 |
| Q8TEH0     | FLJ00227 p   | r 3.06122449          | 1 | 1 | 1 | 20.8  | 11.63 | 42 | 1 |
| Q8WUX1     | Sodium-cou   | 1.48305085            | 1 | 1 | 1 | 51.4  | 8.21  | 0  | 1 |
| B5BU62     | Inositol pc  | 1.5037594             | 1 | 1 | 1 | 43.9  | 5.26  | 37 | 1 |
| C9JLX3     | Adenylate    | c 3.52697095          | 1 | 1 | 1 | 53.5  | 6.68  | 0  | 1 |

Table S6 (b). Identified proteins by H2O

| Accession  | Description             | Coverage   | # Peptides | # PSMs | # Unique | PtMW [kDa] | calc. pI | Score | Mascot# | Peptides | Mascot |
|------------|-------------------------|------------|------------|--------|----------|------------|----------|-------|---------|----------|--------|
| Q15149     | Plectin OS=             | 23.9965841 | 101        | 116    | 98       | 531.5      | 5.96     | 1925  |         | 101      |        |
| O75369     | Filamin-B (35.5495772   |            | 77         | 105    | 73       | 278        | 5.73     | 1918  |         | 77       |        |
| Q60FE5     | Filamin A (32.9007634   |            | 68         | 104    | 2        | 278.1      | 6.06     | 1891  |         | 68       |        |
| P21333     | Filamin-A (33.0185115   |            | 67         | 102    | 1        | 280.6      | 6.06     | 1897  |         | 67       |        |
| P08238     | Heat shock 39.2265193   |            | 37         | 100    | 20       | 83.2       | 5.03     | 2318  |         | 37       |        |
| P31327     | Carbamoyl-γ 31.1333333  |            | 44         | 78     | 42       | 164.8      | 6.74     | 1822  |         | 44       |        |
| P49327     | Fatty acid 25.8462764   |            | 55         | 85     | 55       | 273.3      | 6.44     | 1672  |         | 55       |        |
| P07900     | Heat shock 36.2021858   |            | 36         | 93     | 21       | 84.6       | 5.02     | 2166  |         | 36       |        |
| P02545     | Prelamin-A/ 51.8072289  |            | 39         | 79     | 9        | 74.1       | 7.02     | 1947  |         | 39       |        |
| P78527     | DNA-depende 17.2965116  |            | 70         | 76     | 70       | 468.8      | 7.12     | 1257  |         | 70       |        |
| V9HW22     | Epididymis 39.3188854   |            | 26         | 68     | 21       | 70.9       | 5.52     | 1738  |         | 26       |        |
| P13639     | Elongation 36.2470862   |            | 32         | 73     | 31       | 95.3       | 6.83     | 1511  |         | 32       |        |
| P00558     | Phosphoglyc 76.0191847  |            | 31         | 71     | 31       | 44.6       | 8.1      | 1373  |         | 31       |        |
| V9HWB4     | Epididymis 45.1070336   |            | 31         | 71     | 29       | 72.3       | 5.16     | 1315  |         | 31       |        |
| P35579     | Myosin-9 OS= 28.4183673 |            | 54         | 67     | 46       | 226.4      | 5.6      | 1060  |         | 54       |        |
| AOA087WVQ6 | Clathrin he 23.3472305  |            | 37         | 55     | 37       | 191.9      | 5.69     | 1059  |         | 37       |        |
| P22626     | Heterogenec 52.9745042  |            | 18         | 66     | 15       | 37.4       | 8.95     | 1314  |         | 18       |        |
| Q1KLZ0     | HCG15971, i49.3333333   |            | 19         | 123    | 1        | 41.7       | 5.48     | 2259  |         | 19       |        |
| P06733     | Alpha-enole 38.2488479  |            | 19         | 58     | 18       | 47.1       | 7.39     | 1807  |         | 19       |        |
| Q14204     | Cytoplasmic 12.7206199  |            | 55         | 61     | 55       | 532.1      | 6.4      | 946   |         | 55       |        |
| Q3BDU5     | Prelamin-A/ 53.798768   |            | 31         | 59     | 1        | 55.6       | 6.65     | 1384  |         | 31       |        |
| O43707     | Alpha-actin 40.5049396  |            | 30         | 48     | 21       | 104.8      | 5.44     | 1053  |         | 30       |        |
| P04075     | Fructose-bi 59.6153846  |            | 21         | 63     | 19       | 39.4       | 8.09     | 1386  |         | 21       |        |
| AOA0G2JIW1 | Heat shock 41.9003115   |            | 26         | 57     | 4        | 70.1       | 5.66     | 1309  |         | 26       |        |
| P63261     | Actin, cyto 49.3333333  |            | 19         | 107    | 1        | 41.8       | 5.48     | 1814  |         | 19       |        |
| V9HWE1     | Epididymis 56.223176    |            | 32         | 63     | 29       | 53.6       | 5.12     | 1022  |         | 32       |        |
| P04406     | Glyceralde 43.880597    |            | 14         | 65     | 14       | 36         | 8.46     | 1689  |         | 14       |        |
| P80723     | Brain acid 81.0572687   |            | 17         | 41     | 17       | 22.7       | 4.63     | 798   |         | 17       |        |
| V9HWB8     | Pyruvate ki 49.5291902  |            | 23         | 55     | 23       | 57.9       | 7.84     | 1321  |         | 23       |        |
| B4DWK5     | cDNA FLJ54 40.2889246   |            | 23         | 49     | 1        | 68         | 5.5      | 1107  |         | 23       |        |
| Q09666     | Neuroblast 21.8166384   |            | 46         | 62     | 46       | 628.7      | 6.15     | 850   |         | 46       |        |
| P26038     | Moesin OS= 45.5805893   |            | 34         | 54     | 25       | 67.8       | 6.4      | 837   |         | 34       |        |
| P10809     | 60 kDa heat 39.0924956  |            | 22         | 41     | 22       | 61         | 5.87     | 1019  |         | 22       |        |
| P05787     | Keratin, ty 50.7246377  |            | 29         | 54     | 24       | 53.7       | 5.59     | 1226  |         | 29       |        |
| A4QPBO     | IQ motif cc 25.2263126  |            | 36         | 42     | 36       | 189.2      | 6.48     | 721   |         | 36       |        |
| V9HWK2     | Epididymis 32.5396825   |            | 34         | 40     | 34       | 123.7      | 5.66     | 843   |         | 34       |        |
| AOA0D9SGF6 | Spectrin al 17.253803   |            | 38         | 43     | 38       | 287.4      | 5.36     | 669   |         | 38       |        |
| P29401     | Transketol 32.423756    |            | 20         | 47     | 20       | 67.8       | 7.66     | 817   |         | 20       |        |
| P50990     | T-complex p 49.8175182  |            | 26         | 37     | 26       | 59.6       | 5.6      | 851   |         | 26       |        |
| P38646     | Stress-70 p 39.0279823  |            | 26         | 40     | 25       | 73.6       | 6.16     | 837   |         | 26       |        |
| Q04695     | Keratin, ty 38.4259259  |            | 20         | 43     | 9        | 48.1       | 5.02     | 1047  |         | 20       |        |
| Q00839     | Heterogenec 23.5151515  |            | 19         | 45     | 19       | 90.5       | 6        | 710   |         | 19       |        |
| P08729     | Keratin, ty 51.8123667  |            | 26         | 42     | 22       | 51.4       | 5.48     | 917   |         | 26       |        |
| AOA024RAZ7 | Heterogenec 34.9462366  |            | 12         | 50     | 9        | 38.7       | 9.13     | 886   |         | 12       |        |
| AOA024RIA3 | Testicular 20.8884688   |            | 20         | 37     | 20       | 117.8      | 5.76     | 725   |         | 20       |        |
| AOA024R9W5 | HECT, UBA 29.55647005   |            | 34         | 37     | 34       | 481.6      | 5.22     | 587   |         | 34       |        |
| P07437     | Tubulin bet 34.6846847  |            | 15         | 93     | 2        | 49.6       | 4.89     | 2086  |         | 15       |        |
| P68363     | Tubulin alp 41.9068736  |            | 18         | 47     | 1        | 50.1       | 5.06     | 878   |         | 18       |        |
| Q71U36     | Tubulin alp 41.9068736  |            | 18         | 47     | 1        | 50.1       | 5.06     | 886   |         | 18       |        |
| P07355     | Annexin A2 56.0471976   |            | 22         | 42     | 22       | 38.6       | 7.75     | 944   |         | 22       |        |
| P12956     | X-ray repai 28.5714286  |            | 16         | 24     | 16       | 69.8       | 6.64     | 778   |         | 16       |        |
| Q08211     | ATP-depende 25.0393701  |            | 29         | 39     | 29       | 140.9      | 6.84     | 651   |         | 29       |        |
| P14625     | Endoplasmir 29.0161893  |            | 23         | 36     | 21       | 92.4       | 4.84     | 793   |         | 23       |        |
| P62258     | 14-3-3 prot 57.6470588  |            | 19         | 45     | 16       | 29.2       | 4.74     | 940   |         | 19       |        |
| A8K7F6     | cDNA FLJ78 34.2364532   |            | 15         | 27     | 8        | 46.1       | 5.48     | 704   |         | 15       |        |
| AOA0S2Z4G4 | Tropomyosir 58.8709677  |            | 19         | 29     | 12       | 29         | 4.78     | 588   |         | 19       |        |
| P00338     | L-lactate c 39.7590361  |            | 16         | 35     | 15       | 36.7       | 8.27     | 774   |         | 16       |        |
| AOA087WUZ3 | Spectrin be 15.0887574  |            | 28         | 33     | 28       | 274.7      | 5.57     | 484   |         | 28       |        |
| P30101     | Protein dis 37.8217822  |            | 22         | 37     | 15       | 56.7       | 6.35     | 796   |         | 22       |        |
| P68371     | Tubulin bet 34.6067416  |            | 15         | 88     | 2        | 49.8       | 4.89     | 1994  |         | 15       |        |
| P58107     | Epiplakin ( 15.2259332  |            | 26         | 30     | 23       | 555.3      | 5.6      | 545   |         | 26       |        |
| P12814     | Alpha-actin 25.4484305  |            | 20         | 30     | 11       | 103        | 5.41     | 555   |         | 20       |        |
| P05023     | Sodium/pot 24.1446725   |            | 24         | 33     | 24       | 112.8      | 5.49     | 740   |         | 24       |        |
| Q1ELT0     | MHC Class 146.0273973   |            | 14         | 21     | 2        | 41         | 6.9      | 543   |         | 14       |        |
| P68032     | Actin, alp 37.6657825   |            | 13         | 80     | 3        | 42         | 5.39     | 1134  |         | 13       |        |
| P07814     | Bifunctione 21.6931217  |            | 26         | 28     | 26       | 170.5      | 7.33     | 479   |         | 26       |        |
| P02786     | Transferrir 31.7105263  |            | 22         | 28     | 22       | 84.8       | 6.61     | 519   |         | 22       |        |
| P16403     | Histone H1. 27.6995305  |            | 10         | 35     | 10       | 21.4       | 10.93    | 899   |         | 10       |        |
| B4DUQ1     | cDNA FLJ54 39.8633257   |            | 18         | 44     | 18       | 48.5       | 5.92     | 719   |         | 18       |        |
| P67936     | Tropomyosir 54.0322581  |            | 17         | 27     | 9        | 28.5       | 4.69     | 603   |         | 17       |        |
| P11586     | C-1-tetrahy 25.8823529  |            | 22         | 25     | 22       | 101.5      | 7.3      | 517   |         | 22       |        |

|            |              |             |    |    |    |       |       |      |    |
|------------|--------------|-------------|----|----|----|-------|-------|------|----|
| AOA024RCN6 | Valyl-tRNA   | 18.4335443  | 20 | 25 | 20 | 140.4 | 7.59  | 588  | 20 |
| V9HW88     | Calreticuli  | 22.3021583  | 10 | 26 | 10 | 48.1  | 4.44  | 323  | 10 |
| P36578     | 60S ribosom  | 38.4074941  | 16 | 32 | 16 | 47.7  | 11.06 | 575  | 16 |
| P09874     | Poly [ADP-ri | 23.8658777  | 20 | 25 | 20 | 113   | 8.88  | 409  | 20 |
| Q13509     | Tubulin bet  | 30.4444444  | 13 | 50 | 1  | 50.4  | 4.93  | 1167 | 13 |
| Q8WUM4     | Programmed   | 30.9907834  | 22 | 27 | 22 | 96    | 6.52  | 422  | 22 |
| Q59F66     | DEAD box pr  | 34.0569878  | 22 | 27 | 16 | 81    | 7.93  | 585  | 22 |
| P19338     | Nucleolin (  | 22.8169014  | 19 | 32 | 19 | 76.6  | 4.7   | 788  | 19 |
| Q4LE58     | eIF4G1 vari  | 17.6724138  | 23 | 30 | 23 | 178   | 5.31  | 398  | 23 |
| P12270     | Nucleoprotei | 12.1455777  | 24 | 24 | 24 | 267.1 | 5.02  | 463  | 24 |
| P60174     | Triosephos   | 51.048951   | 13 | 29 | 13 | 30.8  | 5.92  | 638  | 13 |
| B2R6L0     | Tubulin bet  | 28.5393258  | 13 | 77 | 1  | 49.9  | 4.89  | 1650 | 13 |
| AOA0AOMTS2 | Glucose-6-P  | 23.9092496  | 13 | 28 | 13 | 64.8  | 9.04  | 563  | 13 |
| V9HW80     | Epididymis   | 35.6079404  | 27 | 35 | 27 | 89.3  | 5.26  | 552  | 27 |
| P49588     | Alanine--tr  | 21.3842975  | 19 | 25 | 19 | 106.7 | 5.53  | 571  | 19 |
| P20700     | Lamin-B1 O   | 34.4709898  | 22 | 26 | 18 | 66.4  | 5.16  | 530  | 22 |
| Q5U077     | L-lactate c  | 30.8383234  | 12 | 24 | 11 | 36.6  | 6.05  | 766  | 12 |
| E5KNY5     | Leucine-ric  | 14.8493544  | 21 | 25 | 21 | 157.8 | 6.13  | 653  | 21 |
| P52789     | Hexokinase   | 22.0283533  | 18 | 20 | 17 | 102.3 | 6.05  | 431  | 18 |
| O43175     | D-3-phosph   | 27.9549719  | 14 | 20 | 14 | 56.6  | 6.71  | 493  | 14 |
| P09972     | Fructose-bi  | 42.032967   | 13 | 32 | 11 | 39.4  | 6.87  | 656  | 13 |
| P23284     | Peptidyl-p   | 51.8518519  | 12 | 30 | 12 | 23.7  | 9.41  | 805  | 12 |
| B2RDX5     | cDNA, FLJ9   | 30.5203938  | 22 | 26 | 22 | 82.1  | 6.67  | 638  | 22 |
| P36871     | Phosphogluc  | 37.366548   | 18 | 21 | 18 | 61.4  | 6.76  | 460  | 18 |
| P27708     | CAD protei   | 13.9325843  | 26 | 31 | 24 | 242.8 | 6.46  | 437  | 26 |
| P27348     | 14-3-3 prot  | 44.0816327  | 16 | 23 | 10 | 27.7  | 4.78  | 422  | 16 |
| P13667     | Protein di   | 36.2790698  | 22 | 32 | 22 | 72.9  | 5.07  | 565  | 22 |
| P62805     | Histone H4   | 54.368932   | 10 | 31 | 10 | 11.4  | 11.36 | 905  | 10 |
| P34932     | Heat shock   | 25.1190476  | 16 | 21 | 15 | 94.3  | 5.19  | 595  | 16 |
| E9KL35     | Epididymis   | 41.6403785  | 15 | 24 | 15 | 35.1  | 7.69  | 612  | 15 |
| Q9NZM1     | Myoferlin (  | 15.4779233  | 27 | 28 | 27 | 234.6 | 6.18  | 436  | 27 |
| P12268     | Inosine-5'   | 32.2957198  | 14 | 19 | 13 | 55.8  | 6.9   | 306  | 14 |
| B4DI54     | cDNA FLJ56   | 20.7092199  | 12 | 25 | 2  | 77.5  | 8.06  | 645  | 12 |
| P49748     | Very long-c  | 28.8549618  | 19 | 27 | 19 | 70.3  | 8.75  | 448  | 19 |
| B4DJ30     | cDNA FLJ61   | 21.1055276  | 22 | 25 | 22 | 112.9 | 6.06  | 443  | 22 |
| Q59EG8     | Proteasome   | 22.2343921  | 17 | 21 | 17 | 100.5 | 5.15  | 429  | 17 |
| AOA140VJW5 | Testicular   | 40.1197605  | 18 | 27 | 18 | 57.1  | 6.55  | 501  | 18 |
| P04083     | Annexin A1   | 44.5086705  | 15 | 22 | 15 | 38.7  | 7.02  | 526  | 15 |
| Q8NC51     | Plasminoger  | 29.9019608  | 11 | 24 | 11 | 44.9  | 8.65  | 333  | 11 |
| Q4LE36     | ACYL vari    | 19.3491645  | 19 | 23 | 19 | 124.5 | 8.03  | 589  | 19 |
| V9HW37     | Epididymis   | 29.0203327  | 17 | 25 | 16 | 59.6  | 5.66  | 439  | 17 |
| P67809     | Nuclease-sc  | 61.1111111  | 11 | 28 | 7  | 35.9  | 9.88  | 354  | 11 |
| P53621     | Coatome st   | 18.2189542  | 21 | 23 | 21 | 138.3 | 7.66  | 421  | 21 |
| AOA024RBH2 | Cytoskelet   | 29.5681063  | 13 | 15 | 13 | 66    | 5.92  | 551  | 13 |
| P11940     | Polyadenyl   | 27.672956   | 19 | 27 | 13 | 70.6  | 9.5   | 607  | 19 |
| Q9NR30     | Nucleolar f  | 24.9042146  | 19 | 25 | 17 | 87.3  | 9.28  | 329  | 19 |
| Q12906     | Interleukir  | 21.7002237  | 18 | 27 | 18 | 95.3  | 8.76  | 606  | 18 |
| P55060     | Exportin-2   | 16.2718847  | 15 | 20 | 15 | 110.3 | 5.77  | 382  | 15 |
| AOA024R8S5 | Protein di   | 33.4645669  | 17 | 22 | 17 | 57.1  | 4.87  | 466  | 17 |
| P49411     | Elongation   | 33.1858407  | 14 | 18 | 14 | 49.5  | 7.61  | 581  | 14 |
| Q9HBB3     | 60S ribosom  | 33.2179931  | 15 | 30 | 15 | 32.9  | 10.58 | 503  | 15 |
| AOA0D9SF53 | ATP-depend   | 22.3738063  | 15 | 20 | 14 | 81.4  | 8.07  | 482  | 15 |
| Q53HV2     | Chaperonin   | 26.519337   | 15 | 20 | 15 | 59.3  | 7.65  | 668  | 15 |
| P62424     | 60S ribosom  | 44.3609023  | 16 | 22 | 16 | 30    | 10.61 | 376  | 16 |
| AOA024RAC5 | Regulator c  | 26.0536398  | 12 | 21 | 12 | 56    | 8.78  | 339  | 12 |
| Q06830     | Peroxi-redo  | 53.2663317  | 13 | 30 | 11 | 22.1  | 8.13  | 538  | 13 |
| P49368     | T-complex    | 32.293578   | 18 | 24 | 18 | 60.5  | 6.49  | 464  | 18 |
| V9HW31     | ATP synthas  | 30.6238185  | 13 | 26 | 13 | 56.5  | 5.4   | 476  | 13 |
| P31040     | Succinate c  | 25.1506024  | 13 | 16 | 13 | 72.6  | 7.39  | 334  | 13 |
| Q6FHU2     | Phosphogly   | 53.9370079  | 13 | 30 | 13 | 28.8  | 7.18  | 285  | 13 |
| P22234     | Multifuncti  | 35.5294118  | 14 | 22 | 14 | 47    | 7.23  | 451  | 14 |
| Q59HH3     | Trifunctio   | 15.583174   | 14 | 22 | 14 | 112.1 | 7.36  | 476  | 14 |
| Q08J23     | tRNA (cyto   | 29.0743155  | 18 | 25 | 18 | 86.4  | 6.77  | 402  | 18 |
| V9HW25     | Epididymis   | 44.7183099  | 16 | 20 | 9  | 33    | 4.67  | 428  | 16 |
| B2R6J2     | cDNA, FLJ9   | 26.4505119  | 19 | 26 | 9  | 69.4  | 6.27  | 420  | 19 |
| AOA024R904 | Calcyclin t  | 48.245614   | 11 | 15 | 11 | 26.2  | 8.25  | 326  | 11 |
| P08727     | Keratin, ty  | 39.5        | 17 | 20 | 11 | 44.1  | 5.14  | 478  | 17 |
| Q7KZF4     | Staphylococ  | 20.8791209  | 16 | 18 | 16 | 101.9 | 7.17  | 380  | 16 |
| Q6P2Q9     | Pre-mRNA-p   | 11.1777302  | 26 | 26 | 26 | 273.4 | 8.84  | 353  | 26 |
| Q9TQ74     | MHC class    | 128.4931507 | 9  | 16 | 0  | 40.9  | 6.34  | 370  | 9  |
| P23526     | Adenosylho   | 32.1759259  | 15 | 23 | 13 | 47.7  | 6.34  | 501  | 15 |
| AOA024RDY0 | RAN bindin   | 14.402917   | 15 | 16 | 15 | 123.6 | 4.94  | 392  | 15 |
| E7EVA0     | Microtubul   | 11.0143666  | 20 | 24 | 20 | 245.3 | 6.23  | 241  | 20 |

|            |                   |             |    |    |    |       |       |     |    |
|------------|-------------------|-------------|----|----|----|-------|-------|-----|----|
| P38919     | Eukaryotic        | 26.7639903  | 12 | 18 | 9  | 46.8  | 6.73  | 434 | 12 |
| Q16658     | Fascin OS=        | 24.9492901  | 13 | 17 | 13 | 54.5  | 7.24  | 462 | 13 |
| P31947     | 14-3-3 prot       | 51.6129032  | 14 | 24 | 10 | 27.8  | 4.74  | 474 | 14 |
| P17987     | T-complex         | 30.2158273  | 17 | 26 | 17 | 60.3  | 6.11  | 484 | 17 |
| A1KYQ7     | Eukaryotic        | 19.0580504  | 17 | 20 | 17 | 105.3 | 5.68  | 414 | 17 |
| V6A6E5     | MHC class I       | 33.3333333  | 9  | 19 | 5  | 40.9  | 6.3   | 353 | 9  |
| P23528     | Cofilin-1         | (46.3855422 | 10 | 24 | 8  | 18.5  | 8.09  | 585 | 10 |
| A8MXP9     | Matrin-3 OS=      | 19.8882682  | 16 | 23 | 16 | 99.9  | 6.04  | 480 | 16 |
| P29692     | Elongation        | 41.2811388  | 9  | 18 | 4  | 31.1  | 5.01  | 565 | 9  |
| E1NZA1     | Peroxisome        | 9.8839386   | 25 | 25 | 25 | 292.6 | 7.43  | 347 | 25 |
| P41091     | Eukaryotic        | 35.8050847  | 15 | 19 | 15 | 51.1  | 8.4   | 372 | 15 |
| J3KTA4     | Probable A128.    | 0130293     | 18 | 23 | 12 | 69    | 8.85  | 410 | 18 |
| G8JLB6     | Heterogene        | 21.3983051  | 8  | 21 | 4  | 51.2  | 6.8   | 457 | 8  |
| Q9Y230     | RuvB-like         | 37.1490281  | 16 | 22 | 16 | 51.1  | 5.64  | 398 | 16 |
| B5BU24     | 14-3-3 prot       | 43.902439   | 12 | 21 | 4  | 28.1  | 4.83  | 466 | 12 |
| Q86VP6     | Cullin-ass        | 17.1544715  | 18 | 21 | 18 | 136.3 | 5.78  | 350 | 18 |
| AOA087X0X3 | Heterogene        | 27.3972603  | 19 | 22 | 5  | 77.5  | 8.78  | 351 | 19 |
| P51991     | Heterogene        | 30.6878307  | 14 | 24 | 4  | 39.6  | 9.01  | 279 | 14 |
| B0AZQ4     | Structural        | 15.0369762  | 17 | 19 | 17 | 141.4 | 7.18  | 356 | 17 |
| J9R021     | Eukaryotic        | 15.195369   | 22 | 24 | 22 | 166.4 | 6.79  | 363 | 22 |
| O75643     | U5 small nt       | 8.94194757  | 19 | 20 | 19 | 244.4 | 6.06  | 314 | 19 |
| P05387     | 60S acidic        | 64.3478261  | 6  | 12 | 6  | 11.7  | 4.54  | 164 | 6  |
| Q01813     | ATP-depend        | 20.2806122  | 13 | 19 | 11 | 85.5  | 7.55  | 344 | 13 |
| P27824     | Calnexin OS=      | 21.1148649  | 11 | 19 | 11 | 67.5  | 4.6   | 300 | 11 |
| P61981     | 14-3-3 prot       | 43.3198381  | 14 | 21 | 8  | 28.3  | 4.89  | 350 | 14 |
| P02533     | Keratin, $\gamma$ | 22.6694915  | 12 | 20 | 2  | 51.5  | 5.16  | 416 | 12 |
| Q9Y490     | Talin-1 OS=       | 10.1928375  | 21 | 22 | 21 | 269.6 | 6.07  | 344 | 21 |
| Q597H1     | Transformat       | 25.3807107  | 6  | 13 | 6  | 42.8  | 5.82  | 326 | 6  |
| P13010     | X-ray repai       | 21.1748634  | 16 | 22 | 16 | 82.7  | 5.81  | 346 | 16 |
| B2RAO3     | cDNA, FLJ9        | 34.6511628  | 16 | 25 | 15 | 48    | 5.38  | 522 | 16 |
| P26641     | Elongation        | 22.1967963  | 11 | 18 | 11 | 50.1  | 6.67  | 514 | 11 |
| P51858     | Hepatoma-de       | 54.5833333  | 14 | 21 | 14 | 26.8  | 4.73  | 293 | 14 |
| AOA0S2Z4R1 | Tyrosine--        | 32.7651515  | 18 | 21 | 18 | 59.1  | 7.05  | 381 | 18 |
| P49792     | E3 SUMO-pr        | 8.18858561  | 18 | 18 | 18 | 358   | 6.2   | 374 | 18 |
| P78371     | T-complex         | 27.4766355  | 14 | 19 | 14 | 57.5  | 6.46  | 348 | 14 |
| O60664     | Perilipin-        | 30.1843318  | 9  | 15 | 9  | 47    | 5.44  | 383 | 9  |
| Q96AE4     | Far upstre        | 25.1552795  | 14 | 19 | 12 | 67.5  | 7.61  | 375 | 14 |
| J3KPF3     | 4F2 cell-s        | 19.8098257  | 12 | 18 | 6  | 68.1  | 5.05  | 378 | 12 |
| P45880     | Voltage-de        | 30.952381   | 8  | 16 | 8  | 31.5  | 7.56  | 283 | 8  |
| P25705     | ATP syntha        | 24.4122966  | 13 | 21 | 13 | 59.7  | 9.13  | 453 | 13 |
| A8K4W0     | 40S riboso        | 43.9393939  | 12 | 24 | 12 | 29.9  | 9.73  | 372 | 12 |
| O76021     | Ribosomal         | 128.9795918 | 14 | 16 | 14 | 54.9  | 10.13 | 305 | 14 |
| Q16891     | MICOS compl       | 19.6569921  | 16 | 17 | 16 | 83.6  | 6.48  | 331 | 16 |
| Q9Y5B9     | FACT compl        | 16.4278892  | 16 | 20 | 16 | 119.8 | 5.66  | 311 | 16 |
| P15531     | Nucleoside        | 53.2894737  | 7  | 20 | 1  | 17.1  | 6.19  | 384 | 7  |
| P23396     | 40S riboso        | 59.2592593  | 16 | 27 | 16 | 26.7  | 9.66  | 483 | 16 |
| P13797     | Plastin-3         | ( 26.984127 | 17 | 22 | 14 | 70.8  | 5.6   | 439 | 17 |
| P09429     | High mobili       | 40          | 10 | 20 | 9  | 24.9  | 5.74  | 326 | 10 |
| AOA0S2Z3L2 | ATPase Ca+        | 17.1785029  | 17 | 18 | 17 | 114.7 | 5.34  | 285 | 17 |
| Q15393     | Splicing fa       | 15.4478225  | 17 | 22 | 17 | 135.5 | 5.26  | 340 | 17 |
| P38159     | RNA-binding       | 38.6189258  | 16 | 23 | 16 | 42.3  | 10.05 | 247 | 16 |
| P63104     | 14-3-3 prot       | 54.6938776  | 14 | 24 | 9  | 27.7  | 4.79  | 520 | 14 |
| AOA140VJY2 | Testicular        | 20.4545455  | 13 | 17 | 12 | 80.1  | 8.21  | 414 | 13 |
| A8K3C3     | T-complex         | 33.0241187  | 16 | 22 | 15 | 57.9  | 7.83  | 278 | 16 |
| Q5JR94     | 40S riboso        | 58.6538462  | 12 | 18 | 12 | 24.2  | 10.32 | 334 | 12 |
| P14866     | Heterogene        | 24.6179966  | 12 | 18 | 12 | 64.1  | 8.22  | 350 | 12 |
| BOYJ88     | Radixin OS=       | 24.3567753  | 17 | 23 | 7  | 68.5  | 6.37  | 307 | 17 |
| B2R825     | Alpha-1,4         | 19.8347107  | 16 | 21 | 16 | 97    | 7.3   | 360 | 16 |
| J3QQX2     | Rho GDP-di        | 36.1702128  | 7  | 12 | 7  | 25.8  | 7.44  | 267 | 7  |
| Q14103     | Heterogene        | 23.3802817  | 7  | 13 | 6  | 38.4  | 7.81  | 405 | 7  |
| V9HW29     | Kinesin-I         | 15.4724818  | 12 | 13 | 12 | 109.6 | 6.51  | 317 | 12 |
| A8K486     | Peptidyl-p        | 39.3939394  | 8  | 22 | 8  | 18    | 6.9   | 494 | 8  |
| AOA140VK56 | Transaldol        | 37.0919881  | 13 | 15 | 13 | 37.5  | 6.81  | 421 | 13 |
| Q16881     | Thioredoxin       | 18.798151   | 12 | 16 | 11 | 70.9  | 7.39  | 257 | 12 |
| Q16531     | DNA damage-       | 16.754386   | 17 | 18 | 17 | 126.9 | 5.26  | 328 | 17 |
| Q13283     | Ras GTPase-       | 28.9699571  | 10 | 17 | 8  | 52.1  | 5.52  | 162 | 10 |
| MOQZM1     | Heterogene        | 39.9477807  | 15 | 18 | 1  | 40    | 6.73  | 284 | 15 |
| V9HW43     | Epididymis        | 51.2195122  | 11 | 18 | 11 | 22.8  | 6.4   | 294 | 11 |
| G3V5Z7     | Proteasome        | 38.4920635  | 11 | 14 | 11 | 28.1  | 6.76  | 312 | 11 |
| P35613     | Basigin OS=       | 20.7792208  | 7  | 13 | 7  | 42.2  | 5.66  | 207 | 7  |
| P55786     | Puromycin-        | 18.0631121  | 16 | 19 | 16 | 103.2 | 5.72  | 288 | 16 |
| Q32Q12     | Nucleoside        | 42.4657534  | 7  | 21 | 1  | 32.6  | 8.48  | 341 | 7  |
| A8KAQ5     | cDNA FLJ77        | 35.6979405  | 12 | 18 | 12 | 51.5  | 10.01 | 220 | 12 |



|            |              |             |    |    |    |       |       |     |    |
|------------|--------------|-------------|----|----|----|-------|-------|-----|----|
| D9IAI1     | Epididymis   | 49.7326203  | 8  | 13 | 8  | 21    | 7.53  | 425 | 8  |
| P40925     | Malate dehyd | 29.3413174  | 9  | 15 | 9  | 36.4  | 7.36  | 445 | 9  |
| E9KL44     | Epididymis   | 17.5622543  | 11 | 12 | 11 | 82.9  | 9.04  | 236 | 11 |
| Q15084     | Protein disc | 28.6363636  | 11 | 15 | 11 | 48.1  | 5.08  | 421 | 11 |
| P21291     | Cysteine ar  | 46.6321244  | 6  | 9  | 6  | 20.6  | 8.57  | 250 | 6  |
| P17812     | CTP synthas  | 26.9035533  | 14 | 17 | 13 | 66.6  | 6.46  | 235 | 14 |
| B5BUB5     | Autoantiger  | 20.0980392  | 9  | 15 | 9  | 46.8  | 7.12  | 254 | 9  |
| A8K3H8     | cDNA FLJ77   | 19.8641766  | 12 | 16 | 11 | 65.3  | 5.11  | 280 | 12 |
| A0A024RBS2 | 60S acidic   | 36.2776025  | 8  | 13 | 8  | 34.3  | 5.97  | 288 | 8  |
| H7BYY1     | Tropomyosin  | 40.3225806  | 12 | 16 | 6  | 28.7  | 4.82  | 320 | 12 |
| P05556     | Integrin be  | 21.679198   | 15 | 16 | 15 | 88.4  | 5.39  | 266 | 15 |
| B2R8Z8     | cDNA, FLJ9   | 20.3852327  | 11 | 19 | 8  | 69.6  | 8.76  | 399 | 11 |
| B4DDB6     | Heterogene   | 27.5280899  | 11 | 18 | 1  | 37    | 8.31  | 270 | 11 |
| Q9Y310     | tRNA-splici  | 26.1386139  | 12 | 13 | 12 | 55.2  | 7.23  | 319 | 12 |
| P49915     | GMP synthas  | 19.4805195  | 12 | 16 | 12 | 76.7  | 6.87  | 177 | 12 |
| Q13247     | Serine/argi  | 24.7093023  | 10 | 16 | 4  | 39.6  | 11.43 | 327 | 10 |
| A0A087X1N8 | Serpin B6    | 33.6708861  | 11 | 17 | 10 | 44.8  | 5.68  | 360 | 11 |
| P62701     | 40S ribosom  | 36.8821293  | 10 | 18 | 10 | 29.6  | 10.15 | 375 | 10 |
| B2RDY9     | Adenylyl cy  | 27.7894737  | 12 | 15 | 12 | 51.6  | 8.22  | 242 | 12 |
| P52209     | 6-phosphogl  | 22.9813665  | 10 | 13 | 10 | 53.1  | 7.23  | 244 | 10 |
| Q14566     | DNA replic   | 20.8282582  | 15 | 16 | 15 | 92.8  | 5.41  | 309 | 15 |
| Q16719     | Kynureninas  | 24.516129   | 9  | 16 | 9  | 52.3  | 7.03  | 175 | 9  |
| A0A024R814 | Ribosomal p  | 34.3629344  | 11 | 18 | 11 | 30.4  | 10.71 | 379 | 11 |
| P07737     | Profilin-1   | 62.1428571  | 9  | 20 | 9  | 15    | 8.27  | 467 | 9  |
| Q4LE64     | NUMA1 vari   | 9.99528524  | 16 | 19 | 16 | 238.7 | 5.81  | 271 | 16 |
| B2R8R5     | cDNA, FLJ9   | 16.8862275  | 11 | 13 | 11 | 88.5  | 5.77  | 225 | 11 |
| P53618     | Coatome      | 36.3693599  | 12 | 13 | 12 | 107.1 | 6.05  | 268 | 12 |
| I3L504     | Eukaryotic   | 34.4086022  | 10 | 20 | 10 | 20.5  | 5.25  | 221 | 10 |
| O43143     | Pre-mRNA-s   | 18.6163522  | 15 | 15 | 14 | 90.9  | 7.46  | 326 | 15 |
| P48594     | Serpin B4    | 24.3589744  | 10 | 14 | 4  | 44.8  | 6.21  | 349 | 10 |
| HOY7A7     | Calmodulin   | 32.6203209  | 6  | 14 | 6  | 20.7  | 4.36  | 452 | 6  |
| Q8WWI1     | LIM domain   | 9.2097445   | 13 | 13 | 13 | 192.6 | 8.09  | 239 | 13 |
| P17858     | ATP-depend   | 18.8461538  | 13 | 15 | 11 | 85    | 7.5   | 239 | 13 |
| Q9Y266     | Nuclear mi   | 32.9305136  | 10 | 14 | 10 | 38.2  | 5.38  | 239 | 10 |
| P22695     | Cytochrome   | 24.0618102  | 9  | 10 | 9  | 48.4  | 8.63  | 254 | 9  |
| A0A024RDS1 | Heat shock   | 16.0839161  | 12 | 13 | 10 | 96.8  | 5.39  | 343 | 12 |
| P39023     | 60S ribosom  | 20.5955335  | 10 | 19 | 10 | 46.1  | 10.18 | 320 | 10 |
| O95373     | Importin-7   | 8.76685934  | 9  | 11 | 9  | 119.4 | 4.82  | 287 | 9  |
| P55884     | Eukaryotic   | 18.0589681  | 14 | 17 | 14 | 92.4  | 5     | 257 | 14 |
| P29508     | Serpin B3    | 24.8717949  | 10 | 14 | 4  | 44.5  | 6.81  | 451 | 10 |
| B2R9K8     | cDNA, FLJ9   | 24.8587571  | 13 | 17 | 13 | 57.9  | 6.8   | 280 | 13 |
| P62979     | Ubiquitin-   | 56.4102564  | 7  | 53 | 7  | 18    | 9.64  | 840 | 7  |
| A0A0S2Z4Z9 | Non-POU do   | 28.0254777  | 12 | 18 | 10 | 54.2  | 8.95  | 270 | 12 |
| Q9BUF5     | Tubulin be   | 15.9192825  | 8  | 30 | 1  | 49.8  | 4.88  | 662 | 8  |
| P68104     | Elongation   | 19.2640693  | 9  | 20 | 9  | 50.1  | 9.01  | 499 | 9  |
| P23246     | Splicing f   | 20.6506365  | 14 | 17 | 13 | 76.1  | 9.44  | 312 | 14 |
| A0A0U5Q331 | MHC class    | 119.4520548 | 5  | 12 | 1  | 40.8  | 6.15  | 238 | 5  |
| D9UB11     | MHC class    | 119.4520548 | 5  | 12 | 1  | 41.7  | 6.38  | 238 | 5  |
| P55795     | Heterogene   | 21.3808463  | 8  | 16 | 4  | 49.2  | 6.3   | 266 | 8  |
| Q8TEM1     | Nuclear por  | 7.26020138  | 13 | 13 | 13 | 205   | 6.81  | 288 | 13 |
| O75694     | Nuclear por  | 11.4306254  | 12 | 15 | 12 | 155.1 | 6.16  | 283 | 12 |
| Q8N163     | Cell cycle   | 19.0682557  | 12 | 12 | 12 | 102.8 | 5.22  | 265 | 12 |
| P12004     | Proliferati  | 31.8007663  | 7  | 13 | 7  | 28.8  | 4.69  | 391 | 7  |
| J3QQ67     | 60S ribosom  | 35.7894737  | 8  | 14 | 8  | 21.8  | 11.72 | 377 | 8  |
| V9HWC7     | Epididymis   | 51.7857143  | 13 | 23 | 13 | 25    | 6.38  | 313 | 13 |
| P41250     | Glycine--t   | 15.8322057  | 12 | 19 | 12 | 83.1  | 7.03  | 285 | 12 |
| Q562R1     | Beta-actin   | 18.0851064  | 7  | 37 | 1  | 42    | 5.59  | 575 | 7  |
| P15121     | Aldose red   | 31.3291139  | 11 | 24 | 10 | 35.8  | 6.98  | 312 | 11 |
| K7ENT6     | Tropomyosin  | 46.9273743  | 9  | 13 | 1  | 20.6  | 4.61  | 294 | 9  |
| P46087     | Probable     | 216.7487685 | 13 | 14 | 13 | 89.2  | 9.23  | 208 | 13 |
| P27695     | DNA-(apurin  | 29.8742138  | 8  | 15 | 8  | 35.5  | 8.12  | 223 | 8  |
| Q9UQ80     | Proliferati  | 39.8477157  | 15 | 19 | 15 | 43.8  | 6.55  | 250 | 15 |
| Q16576     | Histone-bir  | 25.6470588  | 10 | 13 | 4  | 47.8  | 5.05  | 274 | 10 |
| B2RBR9     | cDNA, FLJ9   | 16.7808219  | 12 | 16 | 12 | 97.1  | 4.78  | 254 | 12 |
| A0A024R4K3 | Malate dehyd | 35.5029586  | 10 | 22 | 10 | 35.5  | 8.68  | 555 | 10 |
| Q96QK1     | Vacuolar p   | 18.718593   | 13 | 14 | 13 | 91.6  | 5.49  | 262 | 13 |
| A8K690     | cDNA FLJ76   | 27.6243094  | 15 | 17 | 15 | 62.6  | 6.8   | 159 | 15 |
| A0A0K0K1K4 | Proteasome   | 35.0806452  | 7  | 10 | 7  | 27.9  | 8.46  | 202 | 7  |
| X5DR09     | General tr   | 16.5330661  | 14 | 17 | 14 | 112.3 | 6.39  | 188 | 14 |
| P11498     | Pyruvate c   | 10.7809847  | 10 | 10 | 10 | 129.6 | 6.84  | 265 | 10 |
| Q9UHB9     | Signal rec   | 17.5438596  | 10 | 11 | 10 | 70.7  | 8.56  | 279 | 10 |
| P62269     | 40S ribosom  | 42.7631579  | 10 | 16 | 10 | 17.7  | 10.99 | 465 | 10 |
| P62263     | 40S ribosom  | 41.7218543  | 8  | 14 | 8  | 16.3  | 10.05 | 315 | 8  |

|            |                       |    |    |    |       |       |     |    |
|------------|-----------------------|----|----|----|-------|-------|-----|----|
| P15924     | Desmoplakin6.06060606 | 16 | 16 | 16 | 331.6 | 6.81  | 233 | 16 |
| B5BU01     | Eukaryotic 26.7267267 | 8  | 13 | 8  | 38.3  | 5.94  | 206 | 8  |
| Q15691     | Microtubule36.1940299 | 8  | 12 | 8  | 30    | 5.14  | 186 | 8  |
| A8K492     | cDNA FLJ7613.6666667  | 10 | 15 | 10 | 101.1 | 6.16  | 259 | 10 |
| B2R7P8     | cDNA, FLJ922.2972973  | 10 | 13 | 10 | 64.6  | 6.8   | 196 | 10 |
| Q14683     | Structural 11.9221411 | 12 | 14 | 12 | 143.1 | 7.64  | 217 | 12 |
| Q14240     | Eukaryotic 22.8501229 | 9  | 13 | 2  | 46.4  | 5.48  | 297 | 9  |
| P41252     | Isoleucine- 12.836767 | 15 | 21 | 15 | 144.4 | 6.15  | 228 | 15 |
| Q59ETO     | Glucan, bra17.9045093 | 12 | 14 | 12 | 86.1  | 6.93  | 181 | 12 |
| Q59EA2     | Coronin (F18.3632735  | 9  | 12 | 9  | 56.3  | 8.19  | 302 | 9  |
| P00505     | Aspartate ε25.1162791 | 11 | 13 | 11 | 47.5  | 9.01  | 277 | 11 |
| O14980     | Exportin-1 11.7647059 | 11 | 13 | 11 | 123.3 | 6.06  | 230 | 11 |
| P21796     | Voltage-dep28.2685512 | 8  | 14 | 8  | 30.8  | 8.54  | 370 | 8  |
| V9HWWK0    | Signal reccl8.1818182 | 11 | 12 | 11 | 74.6  | 9.26  | 219 | 11 |
| Q53SS8     | Epididymis 35.1123596 | 9  | 17 | 6  | 37.5  | 7.09  | 339 | 9  |
| B1AP13     | Complement 20.9459459 | 9  | 20 | 9  | 49.3  | 8.82  | 326 | 9  |
| A8K9K6     | cDNA FLJ7617.8451178  | 10 | 12 | 10 | 65.9  | 9.23  | 228 | 10 |
| B4DLV7     | Rab GDP di26.9487751  | 10 | 12 | 7  | 51.1  | 8.18  | 165 | 10 |
| P06454     | Prothymosin 36.036036 | 6  | 16 | 6  | 12.2  | 3.78  | 568 | 6  |
| C9JIF9     | Acylamino-ε19.1316147 | 11 | 11 | 11 | 81.6  | 5.54  | 231 | 11 |
| B2R9S4     | cDNA, FLJ926.4367816  | 9  | 14 | 9  | 38.5  | 6.37  | 267 | 9  |
| Q8WVX7     | Ribosomal p45.2229299 | 9  | 17 | 9  | 17.3  | 10.52 | 363 | 9  |
| P62906     | 60S ribosom35.0230415 | 9  | 15 | 9  | 24.8  | 9.94  | 136 | 9  |
| AOA0S2Z410 | Hydroxyster35.6321839 | 7  | 9  | 7  | 26.9  | 7.78  | 278 | 7  |
| K7ELL7     | Glucosidase22.4299065 | 11 | 14 | 11 | 60.2  | 4.41  | 320 | 11 |
| Q5U0F4     | Eukaryotic 29.2307692 | 9  | 11 | 9  | 36.5  | 5.64  | 223 | 9  |
| A2RUM7     | Ribosomal p29.6296296 | 10 | 17 | 10 | 34.3  | 9.72  | 285 | 10 |
| P16152     | Carbonyl re34.6570397 | 8  | 14 | 8  | 30.4  | 8.32  | 327 | 8  |
| AOA0C4DG17 | 40S ribosom25.3333333 | 7  | 14 | 7  | 33.3  | 4.87  | 377 | 7  |
| Q7L1Q6     | Basic leuci26.2529833 | 13 | 18 | 10 | 48    | 5.92  | 289 | 13 |
| Q53GG0     | Epithelial 17.9183136 | 11 | 11 | 11 | 85.2  | 6.84  | 246 | 11 |
| Q59EF6     | Calpain 2, 15.0891632 | 9  | 10 | 9  | 83.1  | 5.06  | 187 | 9  |
| B011T2     | Unconventic14.5383104 | 12 | 13 | 12 | 116.4 | 8.73  | 212 | 12 |
| P05198     | Eukaryotic 34.9206349 | 12 | 14 | 12 | 36.1  | 5.08  | 280 | 12 |
| H7BZJ3     | Protein di58.5365854  | 8  | 12 | 1  | 13.5  | 7.3   | 344 | 8  |
| E9KL48     | Epididymis 20.4301075 | 9  | 10 | 9  | 61.4  | 7.8   | 220 | 9  |
| AOA024R056 | Guanine nuc25.5882353 | 8  | 12 | 4  | 37.4  | 6     | 146 | 8  |
| P62879     | Guanine nuc29.7058824 | 9  | 12 | 5  | 37.3  | 6     | 150 | 9  |
| P46060     | Ran GTPase-22.8279387 | 11 | 11 | 11 | 63.5  | 4.68  | 211 | 11 |
| P07954     | Fumarate hy 21.372549 | 9  | 9  | 9  | 54.6  | 8.76  | 228 | 9  |
| AOA0B7M9W0 | MHC class 125.6906077 | 7  | 9  | 2  | 40.3  | 5.99  | 219 | 7  |
| P13804     | Electron tr35.4354354 | 9  | 11 | 9  | 35.1  | 8.38  | 206 | 9  |
| A8K401     | Prohibitin,41.5441176 | 11 | 16 | 11 | 29.8  | 5.76  | 368 | 11 |
| P62888     | 60S ribosom55.6521739 | 5  | 14 | 5  | 12.8  | 9.63  | 278 | 5  |
| K7EJV9     | 60S ribosom37.0588235 | 10 | 18 | 10 | 19.4  | 10.48 | 285 | 10 |
| AOA0U1RRH7 | Histone H2/22.9411765 | 3  | 9  | 1  | 18.5  | 11.52 | 340 | 3  |
| D3DUZ3     | Interferon,15.9618008 | 9  | 11 | 9  | 82.4  | 9.32  | 161 | 9  |
| Q619V5     | SLC25A6 prc40.2684564 | 14 | 18 | 3  | 32.8  | 9.74  | 320 | 14 |
| P04843     | Dolichyl-di17.7924217 | 9  | 11 | 9  | 68.5  | 6.38  | 313 | 9  |
| Q12965     | Unconventic11.9133574 | 11 | 12 | 11 | 127   | 8.92  | 158 | 11 |
| O15067     | Phosphoric8.37070254  | 9  | 13 | 9  | 144.6 | 5.76  | 189 | 9  |
| Q9Y3F4     | Serine-thre36.8571429 | 10 | 11 | 10 | 38.4  | 5.12  | 217 | 10 |
| B2RCM2     | cDNA, FLJ913.6904762  | 14 | 15 | 14 | 134.4 | 7.2   | 232 | 14 |
| Q15046     | Lysine-tr25.1256281   | 13 | 15 | 13 | 68    | 6.35  | 189 | 13 |
| Q09028     | Histone-bir26.5882353 | 10 | 11 | 4  | 47.6  | 4.89  | 253 | 10 |
| P32004     | Neural cel18.83054893 | 10 | 10 | 10 | 139.9 | 6.24  | 184 | 10 |
| P37802     | Transgelin-55.2763819 | 11 | 14 | 11 | 22.4  | 8.25  | 272 | 11 |
| AOA024RAM0 | Transportir11.0244989 | 8  | 9  | 8  | 102.3 | 4.98  | 202 | 8  |
| A8K3A8     | cDNA FLJ7516.516129   | 11 | 11 | 11 | 87.8  | 7.15  | 248 | 11 |
| AOA0S2Z4A5 | DNA helica22.5312935  | 14 | 14 | 14 | 81.3  | 6.46  | 161 | 14 |
| B2R7W4     | cDNA, FLJ911.6903633  | 8  | 13 | 5  | 70.9  | 7.74  | 309 | 8  |
| Q59FR8     | Galectin (F21.7054264 | 5  | 10 | 5  | 27.1  | 8.41  | 243 | 5  |
| A2A274     | Aconitate l16.0248447 | 10 | 12 | 10 | 87.8  | 7.37  | 168 | 10 |
| A8K9A4     | cDNA FLJ75119.9346405 | 8  | 18 | 8  | 33.6  | 5.14  | 376 | 8  |
| Q15293     | Reticulocal21.4501511 | 5  | 10 | 5  | 38.9  | 5     | 117 | 5  |
| AOA0S2Z4J1 | Hydroxyster13.7228261 | 9  | 10 | 9  | 79.6  | 8.84  | 239 | 9  |
| O14975     | Very long-c18.0645161 | 10 | 14 | 10 | 70.3  | 8.51  | 178 | 10 |
| Q00796     | Sorbitol de27.7310924 | 8  | 13 | 8  | 38.3  | 7.97  | 146 | 8  |
| P43490     | Nicotinamic26.0692464 | 11 | 14 | 11 | 55.5  | 7.15  | 201 | 11 |
| F5H0E2     | 4F2 cell-st42.0689655 | 7  | 11 | 1  | 15.7  | 5.06  | 288 | 7  |
| Q03252     | Lamin-B2 Oε14.6774194 | 10 | 12 | 6  | 69.9  | 5.59  | 232 | 10 |
| AOA140VJT8 | Testicular 23.6442516 | 9  | 10 | 9  | 49.9  | 4.82  | 254 | 9  |
| AOA0A0MRM9 | Nucleolar ε14.1242938 | 11 | 15 | 11 | 74.6  | 9.47  | 265 | 11 |

|            |             |              |    |    |    |       |       |     |    |
|------------|-------------|--------------|----|----|----|-------|-------|-----|----|
| B2R7C5     | DNA helica  | 19.3069307   | 15 | 16 | 15 | 91    | 5.77  | 228 | 15 |
| Q99623     | Prohibitin  | 33.1103679   | 9  | 11 | 9  | 33.3  | 9.83  | 205 | 9  |
| A0A024R1V4 | 60S ribosom | 43.3823529   | 6  | 16 | 6  | 15.8  | 10.56 | 266 | 6  |
| P34897     | Serine hyd  | 19.2460317   | 11 | 22 | 11 | 56    | 8.53  | 300 | 11 |
| Q5T4S7     | E3 ubiquiti | 4.39899672   | 14 | 15 | 14 | 573.5 | 6.04  | 167 | 14 |
| P39687     | Acidic leuc | 17.2690763   | 7  | 14 | 3  | 28.6  | 4.09  | 222 | 7  |
| P12429     | Annexin A3  | 26.006192    | 10 | 12 | 10 | 36.4  | 5.92  | 262 | 10 |
| P05141     | ADP/ATP tr  | 35.5704698   | 12 | 20 | 4  | 32.8  | 9.69  | 343 | 12 |
| Q5VXV3     | SET OS=Hom  | 29.3103448   | 7  | 14 | 7  | 33.5  | 4.32  | 211 | 7  |
| V9HWH1     | Epididymis  | 17.9419525   | 7  | 9  | 7  | 42.7  | 6.28  | 224 | 7  |
| Q92621     | Nuclear poi | 6.61033797   | 12 | 12 | 12 | 227.8 | 6.19  | 193 | 12 |
| A0A140VKA6 | Testis secr | 25.203252    | 9  | 11 | 9  | 41.3  | 5.27  | 181 | 9  |
| O75533     | Splicing f  | 9.96932515   | 10 | 11 | 10 | 145.7 | 7.09  | 160 | 10 |
| Q01650     | Large neut  | 11.2426036   | 5  | 8  | 5  | 55    | 7.72  | 240 | 5  |
| Q9Y2W1     | Thyroid ho  | 10.6806283   | 9  | 12 | 9  | 108.6 | 10.15 | 141 | 9  |
| O43242     | 26S protea  | 19.8501873   | 10 | 11 | 10 | 60.9  | 8.44  | 223 | 10 |
| P38606     | V-type prot | 17.3419773   | 9  | 11 | 9  | 68.3  | 5.52  | 219 | 9  |
| O75390     | Citrate syr | 17.167382    | 7  | 11 | 7  | 51.7  | 8.32  | 254 | 7  |
| P15880     | 40S ribosom | 27.9863481   | 8  | 14 | 4  | 31.3  | 10.24 | 299 | 8  |
| B4DS05     | cDNA FLJ59  | 19.6891192   | 7  | 11 | 5  | 44.1  | 4.7   | 232 | 7  |
| E9PL71     | Elongation  | 43.315508    | 6  | 9  | 1  | 20.8  | 5.01  | 271 | 6  |
| Q96P70     | Importin-9  | 11.5273775   | 10 | 12 | 10 | 115.9 | 4.81  | 207 | 10 |
| P36952     | Serpin B5   | 35.4666667   | 10 | 12 | 10 | 42.1  | 6.05  | 227 | 10 |
| Q9NTJ3     | Structural  | 9.08385093   | 11 | 11 | 11 | 147.1 | 6.79  | 217 | 11 |
| H3BVG0     | Nuclear poi | 14.5454545   | 11 | 12 | 11 | 99.5  | 5.73  | 210 | 11 |
| P54136     | Arginine-t  | 19.8484848   | 12 | 15 | 12 | 75.3  | 6.68  | 190 | 12 |
| A2A3R6     | 40S ribosom | 29.7188755   | 9  | 15 | 9  | 28.7  | 10.84 | 279 | 9  |
| V5YQL4     | Adenosylho  | 7.10008554   | 9  | 12 | 7  | 130.8 | 6.77  | 203 | 9  |
| P40763     | Signal trar | 14.8051948   | 8  | 9  | 8  | 88    | 6.3   | 225 | 8  |
| P23381     | Tryptophan  | 21.8683652   | 9  | 10 | 9  | 53.1  | 6.23  | 192 | 9  |
| Q13423     | NAD(P) trar | 11.5101289   | 12 | 13 | 12 | 113.8 | 8.09  | 181 | 12 |
| P25788     | Proteasome  | 35.2941176   | 8  | 10 | 8  | 28.4  | 5.33  | 219 | 8  |
| P60866     | 40S ribosom | 22.6890756   | 3  | 8  | 3  | 13.4  | 9.94  | 209 | 3  |
| P31930     | Cytochrome  | 18.9583333   | 8  | 10 | 8  | 52.6  | 6.37  | 150 | 8  |
| Q15645     | Pachytene   | 20.1388889   | 9  | 11 | 9  | 48.5  | 6.09  | 212 | 9  |
| B2R5M8     | Isocitrate  | 19.3236715   | 8  | 9  | 7  | 46.6  | 7.01  | 220 | 8  |
| O43776     | Asparagine  | 21.8978102   | 10 | 14 | 10 | 62.9  | 6.25  | 150 | 10 |
| A0A0U1RRM4 | Polypyrimic | 14.9659864   | 9  | 14 | 7  | 62.4  | 9.1   | 324 | 9  |
| P14324     | Farnesyl p  | 20.7637232   | 7  | 9  | 7  | 48.2  | 6.15  | 174 | 7  |
| Q13435     | Splicing f  | 14.301676    | 10 | 10 | 10 | 100.2 | 5.67  | 128 | 10 |
| O60832     | H/ACA ribor | 25.4863813   | 12 | 15 | 12 | 57.6  | 9.42  | 172 | 12 |
| Q9P0L0     | Vesicle-ass | 47.3895582   | 10 | 14 | 9  | 27.9  | 8.62  | 207 | 10 |
| Q92688     | Acidic leuc | 20.7171315   | 8  | 15 | 4  | 28.8  | 4.06  | 234 | 8  |
| B2R9U2     | Peptidylpr  | 27.0152505   | 10 | 12 | 10 | 51.8  | 5.43  | 250 | 10 |
| B2R6F3     | Splicing f  | 27.4390244   | 6  | 13 | 6  | 19.3  | 11.65 | 276 | 6  |
| B5MDF5     | GTP-binding | 30.9012876   | 8  | 15 | 8  | 26.2  | 7.01  | 237 | 8  |
| P35606     | Coatome     | 11.9205298   | 10 | 10 | 10 | 102.4 | 5.27  | 276 | 10 |
| P30419     | Glycylpepti | 17.3387097   | 8  | 8  | 8  | 56.8  | 7.8   | 244 | 8  |
| Q86UP2     | Kinectin    | 0.9.28518791 | 11 | 12 | 11 | 156.2 | 5.64  | 198 | 11 |
| P42167     | Lamina-ass  | 27.3127753   | 9  | 11 | 4  | 50.6  | 9.38  | 161 | 9  |
| A2VCK8     | Thymosin b  | 88.6363636   | 7  | 8  | 7  | 5.1   | 5.06  | 107 | 7  |
| P11387     | DNA topoisc | 15.5555556   | 10 | 12 | 10 | 90.7  | 9.31  | 181 | 10 |
| P11388     | DNA topoisc | 8.75244938   | 13 | 14 | 8  | 174.3 | 8.72  | 164 | 13 |
| P43246     | DNA mismat  | 14.6680942   | 14 | 14 | 14 | 104.7 | 5.77  | 155 | 14 |
| Q15459     | Splicing f  | 15.6368222   | 9  | 13 | 9  | 88.8  | 5.22  | 145 | 9  |
| Q9Y2X3     | Nucleolar   | 15.1228733   | 6  | 8  | 6  | 59.5  | 8.92  | 271 | 6  |
| O95433     | Activator   | 19.2307692   | 6  | 9  | 6  | 38.3  | 5.53  | 233 | 6  |
| B2RD79     | cDNA, FLJ9  | 20.0404858   | 8  | 8  | 8  | 56    | 5.3   | 170 | 8  |
| V9HW63     | Epididymis  | 35.0553506   | 7  | 9  | 6  | 30.5  | 6.29  | 170 | 7  |
| P27105     | Erythrocyt  | 32.9861111   | 8  | 9  | 8  | 31.7  | 7.88  | 158 | 8  |
| B4DZRO     | cDNA FLJ55  | 13.4792627   | 9  | 10 | 7  | 97.5  | 5.77  | 284 | 9  |
| Q08170     | Serine/argi | 12.7530364   | 7  | 12 | 1  | 56.6  | 11.52 | 208 | 7  |
| Q59F19     | Ribosomal   | 138.071066   | 5  | 13 | 5  | 21.5  | 10.1  | 258 | 5  |
| P26373     | 60S ribosom | 34.1232227   | 7  | 12 | 7  | 24.2  | 11.65 | 276 | 7  |
| P16989     | Y-box-bind  | 35.7526882   | 7  | 12 | 3  | 40.1  | 9.77  | 199 | 7  |
| I3L2B0     | Clustered   | 18.81877023  | 10 | 11 | 10 | 138.1 | 6.04  | 167 | 10 |
| Q16822     | Phosphoenol | 15.78125     | 7  | 8  | 7  | 70.7  | 7.62  | 252 | 7  |
| A0A024R1K7 | Tyrosine    | 3-36.5853659 | 10 | 12 | 6  | 28.2  | 4.84  | 208 | 10 |
| A0A140VJE8 | AP complex  | 10.935857    | 10 | 10 | 4  | 105.6 | 5.34  | 219 | 10 |
| P25786     | Proteasome  | 36.121673    | 10 | 12 | 10 | 29.5  | 6.61  | 196 | 10 |
| P11413     | Glucose-6-t | 24.8543689   | 11 | 13 | 11 | 59.2  | 6.84  | 176 | 11 |
| B1AHB0     | DNA helica  | 18.2561308   | 11 | 13 | 11 | 82.2  | 8.37  | 139 | 11 |
| A0A0K0K1L8 | Epididymis  | 23.6947791   | 5  | 9  | 5  | 28.7  | 6.02  | 243 | 5  |

|            |             |              |    |    |    |       |       |     |    |
|------------|-------------|--------------|----|----|----|-------|-------|-----|----|
| Q9UHD8     | Septin-9    | 17.9180887   | 8  | 11 | 8  | 65.4  | 8.97  | 131 | 8  |
| Q13619     | Cullin-4A   | 12.1212121   | 9  | 9  | 7  | 87.6  | 8.13  | 257 | 9  |
| Q8NE71     | ATP-binding | 16.8047337   | 11 | 13 | 11 | 95.9  | 6.8   | 196 | 11 |
| Q12788     | Transducin  | 12.9950495   | 9  | 11 | 9  | 89    | 6.9   | 195 | 9  |
| AOA024R2Q4 | Ribosomal r | 32.3529412   | 8  | 11 | 8  | 24.1  | 11.62 | 246 | 8  |
| Q9Y617     | Phosphoseri | 30.8108108   | 10 | 10 | 10 | 40.4  | 7.66  | 229 | 10 |
| P62917     | 60S ribosom | 19.8443358   | 6  | 13 | 6  | 28    | 11.03 | 253 | 6  |
| AOA087WTP3 | Far upstre  | 12.6582278   | 6  | 8  | 5  | 73    | 7.71  | 208 | 6  |
| AOA140VJX1 | Testicular  | 27.1662763   | 8  | 9  | 8  | 45.2  | 8.85  | 142 | 8  |
| P61221     | ATP-binding | 12.8547579   | 7  | 8  | 7  | 67.3  | 8.34  | 251 | 7  |
| P35580     | Myosin-10   | 4.20040486   | 9  | 12 | 1  | 228.9 | 5.54  | 202 | 9  |
| P62633     | Cellular mt | 31.6384181   | 5  | 6  | 5  | 19.5  | 7.71  | 178 | 5  |
| Q13838     | Spliceosom  | 16.3551402   | 7  | 13 | 3  | 49    | 5.67  | 246 | 7  |
| AOA140VK94 | RAN binding | 37.8109453   | 5  | 10 | 5  | 23.3  | 5.29  | 187 | 5  |
| P00966     | Argininosuc | 23.3009709   | 12 | 18 | 12 | 46.5  | 8.02  | 248 | 12 |
| J3KTL2     | Serine/argi | 37.944664    | 9  | 23 | 9  | 28.3  | 10.08 | 423 | 9  |
| Q02750     | Dual speci  | 118.3206107  | 7  | 8  | 5  | 43.4  | 6.62  | 211 | 7  |
| Q08AJ9     | Histone H2f | 30           | 3  | 8  | 1  | 14.1  | 11.05 | 223 | 3  |
| MOR0R2     | 40S ribosom | 28           | 8  | 10 | 8  | 25.3  | 9.76  | 201 | 8  |
| O95831     | Apoptosis-i | 19.08646     | 10 | 11 | 10 | 66.9  | 8.95  | 210 | 10 |
| P52888     | Thimet oli  | 12.9172714   | 8  | 10 | 8  | 78.8  | 6.05  | 174 | 8  |
| A8K984     | Structural  | 8.1871345    | 10 | 10 | 10 | 135.5 | 8.43  | 208 | 10 |
| AOA024R4U3 | Tubulin ty  | 13.5093168   | 7  | 10 | 7  | 74.4  | 5.53  | 130 | 7  |
| B2RB23     | cDNA, FLJ9  | 25.6926952   | 8  | 10 | 8  | 42    | 8.25  | 161 | 8  |
| P28074     | Proteasome  | 25.8555133   | 7  | 8  | 7  | 28.5  | 6.92  | 176 | 7  |
| AOA0S2Z491 | Nucleophos  | 13.2653061   | 5  | 11 | 5  | 32.6  | 4.78  | 324 | 5  |
| O15371     | Eukaryotic  | 9.67153285   | 6  | 8  | 6  | 63.9  | 6.05  | 209 | 6  |
| Q53HB3     | Proteasome  | 21.8181818   | 7  | 9  | 6  | 49.2  | 6.21  | 137 | 7  |
| Q9BQG0     | Myb-binding | 12.123494    | 14 | 14 | 14 | 148.8 | 9.28  | 175 | 14 |
| A8KAP3     | cDNA FLJ78  | 12.2427984   | 10 | 10 | 9  | 109.4 | 5.01  | 153 | 10 |
| P00491     | Purine nucl | 31.4878893   | 8  | 9  | 8  | 32.1  | 6.95  | 162 | 8  |
| Q06210     | Glutamine-- | 17.8826896   | 10 | 10 | 10 | 78.8  | 7.11  | 134 | 10 |
| O94906     | Pre-mRNA-p  | 10.7332625   | 9  | 9  | 9  | 106.9 | 8.25  | 162 | 9  |
| O60264     | SWI/SNF--r  | e19.41064639 | 10 | 11 | 10 | 121.8 | 8.09  | 162 | 10 |
| P08559     | Pyruvate de | 26.6666667   | 11 | 12 | 11 | 43.3  | 8.06  | 255 | 11 |
| D2CFK9     | Nucleolar   | (17.8233438  | 11 | 12 | 11 | 73.9  | 9.5   | 192 | 11 |
| P14550     | Alcohol del | 28.9230769   | 8  | 11 | 7  | 36.6  | 6.79  | 228 | 8  |
| P17980     | 26S proteas | 22.095672    | 8  | 11 | 8  | 49.2  | 5.24  | 118 | 8  |
| Q96C19     | EF-hand don | 39.1666667   | 8  | 9  | 8  | 26.7  | 5.2   | 179 | 8  |
| AOA087WUT6 | Eukaryotic  | 9.18032787   | 10 | 10 | 10 | 138.6 | 5.58  | 119 | 10 |
| O14737     | Programmed  | 38.4         | 4  | 6  | 4  | 14.3  | 6.04  | 200 | 4  |
| Q5VWC4     | 26S proteas | e19.2105263  | 6  | 7  | 6  | 41.1  | 4.81  | 161 | 6  |
| Q59EP1     | Annexin (F  | 16.8627451   | 8  | 10 | 8  | 54.9  | 7.27  | 93  | 8  |
| P12081     | Histidine-- | 18.0746562   | 9  | 9  | 9  | 57.4  | 5.88  | 185 | 9  |
| P23634     | Plasma mem  | 8.54149879   | 9  | 9  | 5  | 137.8 | 6.6   | 199 | 9  |
| Q15717     | ELAV-like   | r 32.208589  | 8  | 8  | 8  | 36.1  | 9.17  | 166 | 8  |
| Q01130     | Serine/argi | 24.8868778   | 5  | 8  | 5  | 25.5  | 11.85 | 230 | 5  |
| Q8NBJ5     | Procollager | 14.7909968   | 10 | 11 | 10 | 71.6  | 7.31  | 201 | 10 |
| G3V180     | Dipeptidyl  | 12.0211361   | 7  | 8  | 7  | 84.3  | 5.03  | 203 | 7  |
| A8K7D9     | Importin st | 12.6654064   | 5  | 6  | 5  | 57.8  | 5.4   | 192 | 5  |
| Q53R19     | Arp2/3 com  | p17.6666667  | 5  | 7  | 5  | 34.3  | 7.36  | 157 | 5  |
| AOA140VK70 | Testis sec  | 23.7875289   | 9  | 10 | 9  | 48.6  | 5.95  | 157 | 9  |
| O14929     | Histone acc | 15.5131265   | 6  | 6  | 6  | 49.5  | 5.69  | 218 | 6  |
| P49321     | Nuclear aut | 12.9441624   | 6  | 8  | 6  | 85.2  | 4.3   | 144 | 6  |
| P84098     | 60S ribosom | 17.8571429   | 4  | 8  | 4  | 23.5  | 11.47 | 203 | 4  |
| F8W727     | 60S ribosom | 29.4117647   | 5  | 8  | 5  | 18    | 10.59 | 211 | 5  |
| Q99497     | Protein DJ- | 38.6243386   | 8  | 14 | 8  | 19.9  | 6.79  | 233 | 8  |
| A8K259     | cDNA FLJ78  | 13.1578947   | 5  | 7  | 5  | 46.5  | 8.69  | 185 | 5  |
| AOA024RAI1 | ARP3 actin- | 20.8133971   | 7  | 8  | 7  | 47.3  | 5.88  | 159 | 7  |
| B2R6A3     | Na(+)/H(+)  | 38.547486    | 9  | 13 | 9  | 38.9  | 5.77  | 113 | 9  |
| P82979     | SAP domain- | 38.0952381   | 7  | 8  | 7  | 23.7  | 6.42  | 154 | 7  |
| O43684     | Mitotic che | 25.6097561   | 8  | 9  | 8  | 37.1  | 6.84  | 205 | 8  |
| AOA0S2Z489 | Proteasome  | 16.8859649   | 8  | 8  | 8  | 52.9  | 7.65  | 185 | 8  |
| P26583     | High mobili | 23.923445    | 5  | 9  | 4  | 24    | 7.81  | 198 | 5  |
| O00299     | Chloride ir | 31.9502075   | 7  | 13 | 7  | 26.9  | 5.17  | 171 | 7  |
| Q08945     | FACT comple | 15.2327221   | 10 | 10 | 10 | 81    | 6.87  | 180 | 10 |
| P30048     | Thioredoxir | 21.484375    | 5  | 9  | 5  | 27.7  | 7.78  | 189 | 5  |
| P50579     | Methionine  | 18.6192469   | 7  | 11 | 7  | 52.9  | 5.82  | 156 | 7  |
| B2RBE5     | cDNA, FLJ9  | 11.778291    | 10 | 10 | 10 | 101.2 | 7.42  | 117 | 10 |
| A7BI36     | p180/ribos  | 9.35064935   | 12 | 12 | 12 | 165.6 | 8.97  | 162 | 12 |
| P61160     | Actin-relat | 21.319797    | 7  | 9  | 7  | 44.7  | 6.74  | 232 | 7  |
| E9PAV3     | Nascent pol | 2.64677575   | 4  | 6  | 4  | 205.3 | 9.58  | 324 | 4  |
| B7Z6Z4     | Myosin lig  | 26.4705882   | 6  | 10 | 6  | 26.7  | 5.08  | 166 | 6  |

|            |              |              |    |    |    |       |       |     |    |
|------------|--------------|--------------|----|----|----|-------|-------|-----|----|
| Q59GW5     | Tripartite   | 18.0124224   | 10 | 10 | 10 | 72.2  | 8.06  | 149 | 10 |
| Q14157     | Ubiquitin-10 | 3955842      | 7  | 11 | 7  | 114.5 | 7.11  | 136 | 7  |
| P46013     | Proliferati  | 5.83538084   | 11 | 11 | 11 | 358.5 | 9.45  | 135 | 11 |
| P27694     | Replicatio   | 21.5909091   | 8  | 9  | 8  | 68.1  | 7.21  | 95  | 8  |
| P09382     | Galectin-1   | 54.0740741   | 6  | 9  | 6  | 14.7  | 5.5   | 160 | 6  |
| O00148     | ATP-depend   | 14.7540984   | 6  | 9  | 2  | 49.1  | 5.68  | 204 | 6  |
| P35659     | Protein DE   | 16.5333333   | 6  | 8  | 6  | 42.6  | 8.56  | 191 | 6  |
| BOQY89     | Eukaryotic   | 19.4398682   | 10 | 11 | 10 | 70.9  | 6.65  | 152 | 10 |
| P55809     | Succinyl-C   | 16.1538462   | 8  | 9  | 8  | 56.1  | 7.46  | 249 | 8  |
| AOA024R7T3 | Heterogene   | 20.9638554   | 7  | 11 | 6  | 45.6  | 5.58  | 181 | 7  |
| B4DWA0     | cDNA FLJ5    | 17.62195122  | 3  | 13 | 2  | 34.3  | 10.37 | 170 | 3  |
| P08237     | ATP-depend   | 17.3076923   | 11 | 11 | 10 | 85.1  | 7.99  | 148 | 11 |
| Q96PK6     | RNA-bindin   | 13.303438    | 7  | 7  | 7  | 69.4  | 9.67  | 156 | 7  |
| P51148     | Ras-relate   | 32.4074074   | 6  | 8  | 3  | 23.5  | 8.41  | 234 | 6  |
| C9J6P4     | Zinc finger  | 13.8671875   | 10 | 10 | 10 | 114   | 8.56  | 159 | 10 |
| O00541     | Pescadillo   | 16.8367347   | 9  | 11 | 9  | 68    | 7.33  | 137 | 9  |
| P09622     | Dihydroli    | 15.7170923   | 7  | 8  | 7  | 54.1  | 7.85  | 173 | 7  |
| AOA0S2Z404 | Regulator    | 12.8318584   | 5  | 6  | 5  | 48.1  | 8.16  | 191 | 5  |
| AOA087WW66 | 26S protea   | 17.4186779   | 10 | 10 | 10 | 105.8 | 5.41  | 69  | 10 |
| P38117     | Electron t   | 34.9019608   | 9  | 10 | 9  | 27.8  | 8.1   | 183 | 9  |
| B2RAQ8     | cDNA, FLJ9   | 14.1009056   | 10 | 11 | 10 | 88.3  | 8.59  | 171 | 10 |
| P62195     | 26S protea   | 21.6748768   | 7  | 8  | 6  | 45.6  | 7.55  | 248 | 7  |
| Q15181     | Inorganic    | 121.799308   | 5  | 9  | 4  | 32.6  | 5.86  | 255 | 5  |
| O15143     | Actin-rela   | 19.8924731   | 5  | 8  | 5  | 40.9  | 8.35  | 138 | 5  |
| D3DQR0     | Protein kir  | 14.1176471   | 5  | 6  | 5  | 48.5  | 6.28  | 188 | 5  |
| P30040     | Endoplasm    | 27.5862069   | 6  | 9  | 6  | 29    | 7.31  | 212 | 6  |
| Q9UMS4     | Pre-mRNA-p   | 15.2777778   | 6  | 8  | 6  | 55.1  | 6.61  | 119 | 6  |
| AOA024RBB7 | Nucleosome   | 14.8337596   | 6  | 8  | 4  | 45.3  | 4.46  | 95  | 6  |
| P62249     | 40S riboso   | 38.3561644   | 5  | 9  | 5  | 16.4  | 10.21 | 254 | 5  |
| Q6IQ30     | Polyadenyl   | 14.2424242   | 8  | 11 | 4  | 72.3  | 9.35  | 249 | 8  |
| Q6NUK1     | Calcium-bi   | 20.1257862   | 9  | 9  | 9  | 53.3  | 6.33  | 156 | 9  |
| P62495     | Eukaryotic   | 13.0434783   | 5  | 7  | 5  | 49    | 5.71  | 129 | 5  |
| Q59EN5     | Prosaposin   | 13.9622642   | 7  | 10 | 7  | 58.7  | 5.1   | 150 | 7  |
| Q10567     | AP-1 comple  | 9.5890411    | 9  | 9  | 3  | 104.6 | 5.06  | 159 | 9  |
| P61106     | Ras-relate   | 42.7906977   | 9  | 11 | 8  | 23.9  | 6.21  | 246 | 9  |
| Q15056     | Eukaryotic   | 33.0645161   | 7  | 9  | 7  | 27.4  | 7.23  | 199 | 7  |
| P53985     | Monocarboxy  | 8.6          | 5  | 7  | 5  | 53.9  | 8.66  | 98  | 5  |
| P61604     | 10 kDa heat  | 65.6862745   | 8  | 13 | 8  | 10.9  | 8.92  | 268 | 8  |
| P50213     | Isocitrate   | 18.3060109   | 7  | 7  | 7  | 39.6  | 6.92  | 124 | 7  |
| V9HW58     | Epididymis   | 25.6157635   | 9  | 11 | 9  | 44.8  | 5.17  | 124 | 9  |
| O00469     | Procollage   | 10.1763908   | 7  | 7  | 7  | 84.6  | 6.71  | 174 | 7  |
| AOA0C4DG89 | Probable A   | 18.81782946  | 8  | 8  | 8  | 117.4 | 9.29  | 162 | 8  |
| P49736     | DNA replic   | 14.2699115   | 10 | 10 | 10 | 101.8 | 5.52  | 141 | 10 |
| P31153     | S-adenosyl   | 17.2151899   | 6  | 7  | 6  | 43.6  | 6.48  | 151 | 6  |
| Q12792     | Twinfilin-1  | 28.2857143   | 9  | 10 | 9  | 40.3  | 6.96  | 203 | 9  |
| P30084     | Enoyl-CoA    | 127.5862069  | 6  | 7  | 6  | 31.4  | 8.07  | 194 | 6  |
| P04040     | Catalase     | 0513.2827324 | 7  | 7  | 7  | 59.7  | 7.39  | 148 | 7  |
| E5RJD8     | Tubulin-spe  | 53.7815126   | 6  | 6  | 6  | 14.3  | 5.12  | 181 | 6  |
| Q16629     | Serine/argi  | 21.8487395   | 6  | 8  | 6  | 27.4  | 11.82 | 138 | 6  |
| Q9Y2T3     | Guanine de   | 18.5022026   | 8  | 9  | 8  | 51    | 5.68  | 189 | 8  |
| P62280     | 40S riboso   | 38.6075949   | 8  | 10 | 8  | 18.4  | 10.3  | 172 | 8  |
| B2R704     | cDNA, FLJ9   | 11.88251     | 8  | 8  | 8  | 83.9  | 9.54  | 186 | 8  |
| B2R665     | cDNA, FLJ9   | 18.6813187   | 8  | 10 | 8  | 59.2  | 4.36  | 153 | 8  |
| B2R4C0     | 60S riboso   | 34.0909091   | 6  | 11 | 6  | 20.7  | 10.71 | 172 | 6  |
| AOA0A0MSS8 | Aldo-keto    | 119.1950464  | 7  | 9  | 1  | 36.8  | 7.94  | 135 | 7  |
| P61254     | 60S riboso   | 44.8275862   | 8  | 11 | 8  | 17.2  | 10.55 | 239 | 8  |
| Q9BY44     | Eukaryotic   | 18.2905983   | 8  | 9  | 8  | 64.9  | 8.87  | 99  | 8  |
| P33991     | DNA replic   | 11.3557358   | 8  | 9  | 8  | 96.5  | 6.74  | 134 | 8  |
| Q9NYF8     | Bcl-2-assoc  | 10.2173913   | 8  | 9  | 8  | 106.1 | 9.98  | 131 | 8  |
| P31150     | Rab GDP di   | 17.0022371   | 6  | 7  | 3  | 50.6  | 5.14  | 150 | 6  |
| Q8NI62     | Ribosomal    | 168.3544304  | 5  | 9  | 1  | 8.8   | 8     | 239 | 5  |
| P28331     | NADH-ubiqui  | 12.9298487   | 9  | 10 | 9  | 79.4  | 6.23  | 149 | 9  |
| P13073     | Cytochrome   | 37.8698225   | 6  | 9  | 6  | 19.6  | 9.51  | 265 | 6  |
| A8K5U9     | cDNA FLJ75   | (8.43558282  | 5  | 6  | 4  | 70.7  | 7.62  | 145 | 5  |
| Q00325     | Phosphate    | 19.0607735   | 9  | 16 | 9  | 40.1  | 9.38  | 170 | 9  |
| Q96TA1     | Niban-like   | 14.3431635   | 9  | 10 | 9  | 84.1  | 6.19  | 109 | 9  |
| P42166     | Lamina-ass   | 13.2564841   | 6  | 8  | 1  | 75.4  | 7.66  | 113 | 6  |
| AOA075B716 | 40S riboso   | 16.7539267   | 5  | 9  | 5  | 21.6  | 8.92  | 233 | 5  |
| Q9BT00     | Acidic leuc  | 12.3134328   | 4  | 6  | 4  | 30.7  | 3.85  | 216 | 4  |
| P49756     | RNA-bindin   | 9.96441281   | 7  | 8  | 7  | 100.1 | 6.32  | 134 | 7  |
| Q562L5     | Actin-like   | 56.3106796   | 3  | 10 | 1  | 11.5  | 6.35  | 165 | 3  |
| P26368     | Splicing f   | 12           | 6  | 8  | 6  | 53.5  | 9.09  | 126 | 6  |
| AOA140VKA0 | Caldesmon    | 118.2156134  | 7  | 7  | 7  | 62.6  | 6.37  | 175 | 7  |

|            |              |              |    |    |    |       |       |     |    |
|------------|--------------|--------------|----|----|----|-------|-------|-----|----|
| V9HWH9     | Protein S1C  | 40.952381    | 6  | 14 | 6  | 11.7  | 7.12  | 292 | 6  |
| B4DR52     | Histone H2E  | 26.5060241   | 5  | 13 | 2  | 18    | 10.32 | 353 | 5  |
| A0A024R1S8 | LIM and SH2  | 24.9042146   | 8  | 11 | 8  | 29.7  | 7.05  | 142 | 8  |
| Q13344     | Fus-like p19 | 28030303     | 4  | 8  | 2  | 53.3  | 9.42  | 135 | 4  |
| A0A087X020 | Ribosome m   | 31.6         | 8  | 10 | 8  | 28.8  | 8.75  | 116 | 8  |
| O14776     | Transcripti  | 8.92531876   | 10 | 10 | 10 | 123.8 | 8.65  | 138 | 10 |
| Q92522     | Histone H1   | 31.9248826   | 6  | 11 | 6  | 22.5  | 10.76 | 142 | 6  |
| Q9NQC3     | Reticulon-4  | 5.62080537   | 5  | 7  | 5  | 129.9 | 4.5   | 154 | 5  |
| P84090     | Enhancer of  | 49.0384615   | 5  | 7  | 5  | 12.3  | 5.92  | 189 | 5  |
| C9JRZ6     | MICOS compl  | 31.4655172   | 6  | 6  | 6  | 26.7  | 8.47  | 146 | 6  |
| P51149     | Ras-relatec  | 32.8502415   | 6  | 9  | 6  | 23.5  | 6.7   | 159 | 6  |
| O75367     | Core histor  | 22.8494624   | 7  | 9  | 7  | 39.6  | 9.79  | 144 | 7  |
| Q9NVP1     | ATP-depende  | 8.05970149   | 5  | 6  | 5  | 75.4  | 9.5   | 167 | 5  |
| P52701     | DNA mismat   | 6.83823529   | 9  | 11 | 9  | 152.7 | 6.9   | 134 | 9  |
| H7C2Q8     | EBNA1 bindi  | 21.0526316   | 9  | 10 | 9  | 40.7  | 9.98  | 193 | 9  |
| P99999     | Cytochrome   | 32.3809524   | 4  | 7  | 4  | 11.7  | 9.57  | 121 | 4  |
| P50402     | Emerin OS-1  | 27.5590551   | 6  | 7  | 6  | 29    | 5.5   | 158 | 6  |
| B4DWA6     | cDNA FLJ60   | 29.5522388   | 7  | 11 | 7  | 37.5  | 6.14  | 110 | 7  |
| H7C2I1     | Protein ar   | 25.3369272   | 7  | 8  | 7  | 42.4  | 5.35  | 137 | 7  |
| Q59FD4     | Hexokinase   | 6.84931507   | 7  | 7  | 6  | 105.7 | 6.84  | 229 | 7  |
| A0A0S2Z2Z6 | Annexin (F)  | 12.9271917   | 8  | 8  | 8  | 75.8  | 5.6   | 159 | 8  |
| A0MNN4     | CDW3/SMU1    | (17.3489279  | 8  | 8  | 8  | 57.5  | 7.18  | 135 | 8  |
| A0A024RDG1 | Vesicle doc  | 10.3950104   | 7  | 7  | 7  | 107.8 | 4.91  | 152 | 7  |
| O14744     | Protein ar   | 13.0298273   | 8  | 8  | 8  | 72.6  | 6.29  | 137 | 8  |
| A0A0S2Z3H3 | Solute car   | 29.5302013   | 10 | 14 | 1  | 33    | 9.76  | 231 | 10 |
| Q8NBS9     | Thioredoxir  | 13.8888889   | 5  | 7  | 5  | 47.6  | 5.97  | 130 | 5  |
| A0A0C4DGQ5 | Calpain sm   | 13.6645963   | 4  | 5  | 4  | 33.8  | 6.23  | 175 | 4  |
| Q9Y4L1     | Hypoxia up   | 8.50850851   | 7  | 8  | 7  | 111.3 | 5.22  | 120 | 7  |
| Q6FHX6     | Flap endon   | 14.2105263   | 5  | 6  | 5  | 42.6  | 8.62  | 135 | 5  |
| B2RBM7     | cDNA, FLJ9   | 24.4680851   | 10 | 10 | 9  | 42.8  | 5.94  | 116 | 10 |
| A0A024R7B7 | CDC37 cell   | 22.4867725   | 8  | 8  | 8  | 44.4  | 5.25  | 116 | 8  |
| Q14444     | Caprin-1     | 0513.9633286 | 7  | 9  | 7  | 78.3  | 5.25  | 112 | 7  |
| Q9Y6E2     | Basic leuci  | 16.4677804   | 9  | 12 | 6  | 48.1  | 6.68  | 151 | 9  |
| P60891     | Ribose-pho   | 19.8113208   | 6  | 9  | 3  | 34.8  | 6.98  | 166 | 6  |
| Q5T5C7     | Serine--tr   | 11.9402985   | 5  | 6  | 5  | 61.3  | 7.06  | 138 | 5  |
| P55084     | Trifunction  | 19.8312236   | 10 | 11 | 10 | 51.3  | 9.41  | 109 | 10 |
| P37108     | Signal rec   | 38.2352941   | 3  | 6  | 3  | 14.6  | 10.04 | 111 | 3  |
| Q59ED7     | Putative ur  | 11.516035    | 7  | 8  | 7  | 77.7  | 5.64  | 210 | 7  |
| Q9BVP2     | Guanine nuc  | 12.9326047   | 6  | 6  | 6  | 62    | 9.16  | 158 | 6  |
| B3KMR5     | cDNA FLJ12   | 6.7077872    | 8  | 9  | 8  | 143.6 | 8.75  | 140 | 8  |
| P27635     | 60S ribos    | 28.0373832   | 7  | 10 | 7  | 24.6  | 10.08 | 113 | 7  |
| Q9UHD1     | Cysteine ar  | 33.4337349   | 7  | 10 | 7  | 37.5  | 7.87  | 35  | 7  |
| Q59ECO     | Adenosine    | 8.36012862   | 9  | 9  | 9  | 137.7 | 8.48  | 94  | 9  |
| A0A140VKE9 | Testis tis   | 11.1285266   | 5  | 6  | 5  | 71.4  | 5.2   | 181 | 5  |
| A0A109NGN6 | Proteasome   | 28.2157676   | 5  | 8  | 5  | 26.4  | 4.79  | 190 | 5  |
| E7ETY2     | Treacle pr   | 5.04032258   | 7  | 7  | 7  | 152.2 | 8.85  | 152 | 7  |
| P48047     | ATP syntha   | 40.3755869   | 7  | 8  | 7  | 23.3  | 9.96  | 112 | 7  |
| Q5JTV8     | Torsin-1A    | -i14.0651801 | 7  | 9  | 7  | 66.2  | 8.18  | 140 | 7  |
| B4DWX3     | Importin st  | 16.0813309   | 8  | 9  | 5  | 60.5  | 5.02  | 143 | 8  |
| B2R806     | Eukaryotic   | 14.6067416   | 7  | 7  | 7  | 52.2  | 6.04  | 152 | 7  |
| X5CMJ9     | Proteasome   | 22.826087    | 5  | 6  | 5  | 30.3  | 7.43  | 115 | 5  |
| Q9H4A4     | Aminopepti   | 15.0769231   | 8  | 10 | 8  | 72.5  | 5.74  | 189 | 8  |
| P51570     | Galactokin   | 18.622449    | 7  | 8  | 7  | 42.2  | 6.46  | 163 | 7  |
| Q02809     | Procollage   | 10.7290234   | 7  | 8  | 7  | 83.5  | 6.95  | 100 | 7  |
| Q13442     | 28 kDa heat  | 26.519337    | 5  | 6  | 5  | 20.6  | 8.87  | 200 | 5  |
| P49189     | 4-trimethyl  | 22.4696356   | 10 | 10 | 10 | 53.8  | 5.87  | 89  | 10 |
| Q59EH3     | Acid phosph  | 36.969697    | 6  | 7  | 6  | 18.7  | 7.88  | 172 | 6  |
| Q15050     | Ribosome bi  | 23.5616438   | 8  | 8  | 8  | 41.2  | 10.7  | 164 | 8  |
| Q00688     | Peptidyl-p   | 25           | 6  | 9  | 6  | 25.2  | 9.28  | 215 | 6  |
| B2RD36     | cDNA, FLJ9   | 31.0204082   | 7  | 9  | 7  | 28    | 6.79  | 114 | 7  |
| B3KRM2     | Serine/thre  | 29.7734628   | 7  | 8  | 7  | 35.5  | 5.43  | 131 | 7  |
| O60568     | Procollage   | 8.1300813    | 5  | 6  | 5  | 84.7  | 6.05  | 176 | 5  |
| P83731     | 60S ribos    | 30.5732484   | 5  | 7  | 5  | 17.8  | 11.25 | 204 | 5  |
| B2RD15     | cDNA, FLJ9   | 8.26330532   | 6  | 6  | 6  | 81.8  | 5.54  | 183 | 6  |
| P41236     | Protein ph   | 17.5609756   | 4  | 6  | 4  | 23    | 4.74  | 128 | 4  |
| P51812     | Ribosomal    | 12.2972973   | 8  | 8  | 8  | 83.7  | 6.89  | 87  | 8  |
| Q13185     | Chromobox    | 121.3114754  | 4  | 6  | 4  | 20.8  | 5.33  | 120 | 4  |
| P30044     | Peroxiredo   | 36.4485981   | 6  | 8  | 6  | 22.1  | 8.7   | 157 | 6  |
| B4DPD5     | Ubiquitin    | 124.6753247  | 6  | 7  | 6  | 35.2  | 5.59  | 158 | 6  |
| O75821     | Eukaryotic   | 27.5         | 7  | 8  | 7  | 35.6  | 6.13  | 94  | 7  |
| O75534     | Cold shock   | 11.0275689   | 7  | 7  | 7  | 88.8  | 6.25  | 131 | 7  |
| Q08ET0     | Cell prolif  | 23.046875    | 6  | 7  | 6  | 28.9  | 9.36  | 120 | 6  |
| HOYKD8     | 60S ribos    | 23.5294118   | 6  | 10 | 6  | 19.1  | 11.46 | 146 | 6  |

|            |                       |    |    |    |       |       |     |    |
|------------|-----------------------|----|----|----|-------|-------|-----|----|
| P04264     | Keratin, ty14.1304348 | 6  | 7  | 5  | 66    | 8.12  | 132 | 6  |
| Q14651     | Plastin-1 (9.3799682  | 6  | 7  | 3  | 70.2  | 5.41  | 187 | 6  |
| B4DZF2     | cDNA FLJ59122.44898   | 10 | 10 | 10 | 110.2 | 7.94  | 97  | 10 |
| AOA0B4J207 | Ribose-phos14.1509434 | 4  | 7  | 1  | 34.8  | 6.35  | 156 | 4  |
| O15427     | Monocarboxy10.1075269 | 5  | 9  | 5  | 49.4  | 7.96  | 167 | 5  |
| Q92769     | Histone de10.6557377  | 4  | 5  | 2  | 55.3  | 5.91  | 138 | 4  |
| AOA140VK53 | Testicular 4.14244186 | 8  | 8  | 8  | 299.4 | 12.06 | 63  | 8  |
| P61224     | Ras-related33.1521739 | 6  | 6  | 2  | 20.8  | 5.78  | 129 | 6  |
| P54886     | Delta-1-pyr9.18238994 | 8  | 9  | 8  | 87.2  | 7.12  | 186 | 8  |
| Q6FIG4     | RAB1B prot30.3482587  | 5  | 8  | 1  | 22.2  | 5.73  | 202 | 5  |
| Q15436     | Protein tr13.2026144  | 8  | 8  | 8  | 86.1  | 7.08  | 86  | 8  |
| F8W031     | Uncharacter18.6311787 | 4  | 5  | 4  | 29.2  | 7.01  | 141 | 4  |
| AOA0S2Z471 | Creatine ki14.0740741 | 4  | 5  | 4  | 44.9  | 6.11  | 181 | 4  |
| B4E1U9     | cDNA FLJ54718.220339  | 4  | 6  | 3  | 26.5  | 7.59  | 114 | 4  |
| E7ESP4     | Integrin a18.28025478 | 6  | 6  | 6  | 102.8 | 5.15  | 170 | 6  |
| AOA024QZK8 | Heterogenec19.0751445 | 6  | 8  | 5  | 36.9  | 6.87  | 118 | 6  |
| Q9Y3C6     | Peptidyl-pr30.7228916 | 5  | 8  | 5  | 18.2  | 7.99  | 92  | 5  |
| B2RD27     | cDNA, FLJ913.5802469  | 4  | 6  | 4  | 37    | 6.77  | 164 | 4  |
| P11717     | Cation-indc3.25170614 | 8  | 8  | 8  | 274.2 | 5.94  | 139 | 8  |
| Q15021     | Condensin c6.13847252 | 8  | 8  | 8  | 157.1 | 6.61  | 108 | 8  |
| P49589     | Cysteine-t11.7647059  | 8  | 9  | 8  | 85.4  | 6.76  | 159 | 8  |
| J3KNF8     | Cytochrome 30.6666667 | 3  | 5  | 3  | 16.7  | 4.97  | 105 | 3  |
| AOA0AGYYL6 | Protein RPL22.3684211 | 6  | 11 | 6  | 26.4  | 10.1  | 237 | 6  |
| O75822     | Eukaryotic 19.7674419 | 4  | 5  | 4  | 29    | 4.83  | 125 | 4  |
| P43034     | Platelet-ac15.3658537 | 4  | 5  | 4  | 46.6  | 7.37  | 96  | 4  |
| Q5R3I4     | Tetratrico15.565032   | 6  | 6  | 6  | 52.8  | 5.99  | 174 | 6  |
| Q53F64     | Heterogenec17.1686747 | 5  | 8  | 4  | 36    | 7.42  | 262 | 5  |
| O75396     | Vesicle-tr27.4418605  | 5  | 5  | 5  | 24.6  | 6.92  | 141 | 5  |
| P08754     | Guanine nuc17.2316384 | 5  | 6  | 2  | 40.5  | 5.69  | 129 | 5  |
| Q14498     | RNA-binding11.8867925 | 5  | 6  | 5  | 59.3  | 10.1  | 196 | 5  |
| E9KL30     | Proteasome 16.6064982 | 5  | 5  | 5  | 29.9  | 7.68  | 134 | 5  |
| Q01844     | RNA-binding9.60365854 | 5  | 6  | 5  | 68.4  | 9.33  | 85  | 5  |
| Q99536     | Synaptic ve22.9007634 | 6  | 9  | 6  | 41.9  | 6.29  | 88  | 6  |
| P22087     | rRNA 2'-O-n27.4143302 | 7  | 9  | 7  | 33.8  | 10.18 | 135 | 7  |
| AOA0AGYYJ8 | Putative R19.8689956  | 8  | 8  | 5  | 54.2  | 10.13 | 140 | 8  |
| AOA0AOMRI2 | Sorting ne19.8564593  | 8  | 8  | 8  | 47.8  | 6.43  | 118 | 8  |
| Q14203     | Dynactin st6.49452269 | 7  | 7  | 7  | 141.6 | 5.81  | 153 | 7  |
| P53041     | Serine/thre9.01803607 | 4  | 5  | 4  | 56.8  | 6.28  | 117 | 4  |
| B5BUD2     | Replicatio21.1864407  | 7  | 7  | 7  | 39.2  | 6.44  | 140 | 7  |
| Q9UHX1     | Poly(U)-bir14.8479428 | 7  | 7  | 7  | 59.8  | 5.29  | 142 | 7  |
| Q9BTE3     | Mini-chrom8.25545171  | 4  | 5  | 4  | 72.9  | 5.87  | 119 | 4  |
| O94826     | Mitochondri14.1447368 | 6  | 6  | 6  | 67.4  | 7.12  | 110 | 6  |
| AOA0G2JH68 | Protein di5.2672956   | 6  | 6  | 6  | 141.3 | 5.39  | 115 | 6  |
| J3KQ32     | Odg-like A113.9423077 | 6  | 8  | 6  | 46.9  | 8.06  | 162 | 6  |
| V9HWA6     | Epididymis 36.969697  | 7  | 8  | 6  | 18.5  | 7.85  | 164 | 7  |
| B3KS98     | Eukaryotic 18.852459  | 6  | 8  | 6  | 41.6  | 7.33  | 132 | 6  |
| Q6IPH7     | RPL14 prot15.9090909  | 3  | 5  | 1  | 23.8  | 10.93 | 131 | 3  |
| E5KMI6     | Lon protea9.07194995  | 8  | 8  | 8  | 106.4 | 6.39  | 157 | 8  |
| P30043     | Flavin red24.2718447  | 4  | 6  | 4  | 22.1  | 7.65  | 164 | 4  |
| Q15366     | Poly(rC)-bi21.0958904 | 6  | 12 | 3  | 38.6  | 6.79  | 227 | 6  |
| POCOS5     | Histone H2f 25.78125  | 3  | 9  | 2  | 13.5  | 10.58 | 173 | 3  |
| AOA024R8A2 | GTPase acti9.61667787 | 10 | 10 | 10 | 166.1 | 5.21  | 69  | 10 |
| Q9Y6C9     | Mitochondri20.4620462 | 5  | 8  | 5  | 33.3  | 7.97  | 143 | 5  |
| P23921     | Ribonucleo11.7424242  | 7  | 10 | 7  | 90    | 7.15  | 127 | 7  |
| AOMNP2     | CDW11/WDR5720.1680672 | 6  | 6  | 6  | 39.3  | 8.1   | 111 | 6  |
| Q02880     | DNA topoisc4.73554736 | 9  | 9  | 3  | 183.2 | 8     | 131 | 9  |
| Q1KMD3     | Heterogenec8.70147256 | 6  | 8  | 6  | 85.1  | 4.91  | 104 | 6  |
| V9HW04     | Serine/thre 19.266055 | 5  | 7  | 2  | 37.2  | 6.19  | 149 | 5  |
| Q6FHM6     | NHP2 non-hi 33.59375  | 4  | 5  | 4  | 14.2  | 8.46  | 177 | 4  |
| O95816     | BAG family 32.2274882 | 6  | 7  | 6  | 23.8  | 6.7   | 95  | 6  |
| Q14764     | Major vault9.96640538 | 7  | 7  | 7  | 99.3  | 5.48  | 109 | 7  |
| O15160     | DNA-directc15.6069364 | 4  | 4  | 4  | 39.2  | 5.5   | 181 | 4  |
| F4ZW62     | NF45 OS-Hon16.9230769 | 6  | 14 | 6  | 43    | 5.26  | 154 | 6  |
| Q9BUQ8     | Probable A113.2926829 | 9  | 9  | 9  | 95.5  | 9.55  | 84  | 9  |
| Q12904     | Aminoacyl t24.3589744 | 5  | 8  | 5  | 34.3  | 8.43  | 108 | 5  |
| P20618     | Proteasome 22.406639  | 4  | 7  | 4  | 26.5  | 8.13  | 130 | 4  |
| Q92499     | ATP-dependc8.37837838 | 5  | 5  | 5  | 82.4  | 7.23  | 123 | 5  |
| G3V198     | Nuclear por6.54490107 | 9  | 9  | 9  | 148.9 | 5.57  | 107 | 9  |
| P62913     | 60S riboson24.1573034 | 4  | 8  | 1  | 20.2  | 9.6   | 271 | 4  |
| Q9NSD9     | Phenylalanil1.0356537 | 6  | 6  | 6  | 66.1  | 6.84  | 150 | 6  |
| Q9UKV3     | Apoptotic c9.99254288 | 8  | 9  | 8  | 151.8 | 6.43  | 54  | 8  |
| Q9NYU2     | UDP-glucosc5.72347267 | 9  | 9  | 9  | 177.1 | 5.63  | 58  | 9  |
| Q15008     | 26S protea14.9100257  | 7  | 7  | 7  | 45.5  | 5.62  | 92  | 7  |

|            |             |               |   |    |   |       |       |     |   |
|------------|-------------|---------------|---|----|---|-------|-------|-----|---|
| D3DV26     | S100 calcic | 13.1707317    | 2 | 9  | 2 | 22.3  | 10.33 | 225 | 2 |
| A8K0T9     | cDNA FLJ75  | 24.1258741    | 5 | 6  | 4 | 32.9  | 5.69  | 118 | 5 |
| Q5H9N4     | Putative ur | 29.0429043    | 7 | 7  | 6 | 34.8  | 8.95  | 99  | 7 |
| AOA140VK69 | Aspartate ε | 21.3075061    | 8 | 8  | 8 | 46.2  | 7.01  | 91  | 8 |
| P08758     | Annexin A5  | 16.25         | 6 | 9  | 6 | 35.9  | 5.05  | 209 | 6 |
| Q9H2U2     | Inorganic p | 18.5628743    | 5 | 5  | 4 | 37.9  | 7.39  | 167 | 5 |
| M0R2B7     | DNA polymer | 7.67872904    | 8 | 8  | 8 | 126.3 | 7.21  | 117 | 8 |
| A4D2P0     | Ras-relatec | 30.8056872    | 6 | 10 | 5 | 23.5  | 8.63  | 140 | 6 |
| AOA087WZT3 | Bola-like p | 22.3684211    | 3 | 4  | 3 | 16.9  | 8.19  | 119 | 3 |
| P53992     | Protein trε | 7.58683729    | 6 | 6  | 6 | 118.2 | 7.06  | 116 | 6 |
| P25789     | Proteasome  | 25.6704981    | 7 | 7  | 7 | 29.5  | 7.72  | 142 | 7 |
| HOY2W2     | ATPase fami | 12.5874126    | 7 | 8  | 2 | 64.3  | 9.44  | 69  | 7 |
| E7EPK1     | Septin-7    | 05.16.2471396 | 6 | 6  | 5 | 50.7  | 8.63  | 137 | 6 |
| B3KSH1     | Eukaryotic  | 14.7849462    | 5 | 6  | 5 | 39.1  | 5.45  | 201 | 5 |
| Q13085     | Acetyl-CoA  | 3.83631714    | 7 | 7  | 7 | 265.4 | 6.37  | 116 | 7 |
| Q96IR7     | 4-hydroxypl | 18.328841     | 5 | 5  | 5 | 39.4  | 7.03  | 112 | 5 |
| P47813     | Eukaryotic  | 22.2222222    | 4 | 7  | 4 | 16.5  | 5.24  | 112 | 4 |
| Q8WWW7     | Ataxin-2-l  | 111.9069767   | 7 | 7  | 7 | 113.3 | 8.59  | 76  | 7 |
| P32322     | Proline-f   | 22.2570533    | 5 | 6  | 4 | 33.3  | 7.61  | 157 | 5 |
| P06899     | Histone H2F | 34.1269841    | 4 | 10 | 1 | 13.9  | 10.32 | 282 | 4 |
| P28072     | Proteasome  | 17.5732218    | 5 | 7  | 5 | 25.3  | 4.92  | 142 | 5 |
| AOA024R8E4 | Chromosome  | 30.941704     | 5 | 5  | 5 | 25.4  | 5.52  | 116 | 5 |
| P52434     | DNA-directc | 26.6666667    | 3 | 3  | 3 | 17.1  | 4.68  | 125 | 3 |
| Q59GW6     | Acetyl-CoA  | 15.8415842    | 5 | 5  | 5 | 42.1  | 7.4   | 123 | 5 |
| Q04828     | Aldo-keto r | 19.504644     | 7 | 8  | 1 | 36.8  | 7.88  | 135 | 7 |
| 094905     | Erlin-2 OS  | 17.699115     | 5 | 5  | 5 | 37.8  | 5.62  | 153 | 5 |
| Q5HYG7     | Putative ur | 12.7753304    | 5 | 5  | 5 | 50.3  | 7.8   | 95  | 5 |
| P00492     | Hypoxanthir | 27.0642202    | 5 | 5  | 5 | 24.6  | 6.68  | 112 | 5 |
| B3KXW5     | cDNA FLJ46  | 15.79881657   | 5 | 6  | 5 | 94.1  | 7.05  | 123 | 5 |
| P23193     | Transcripti | 23.5880399    | 6 | 6  | 6 | 33.9  | 8.38  | 104 | 6 |
| 000116     | Alkyldihydr | 10.6382979    | 5 | 5  | 5 | 72.9  | 7.34  | 110 | 5 |
| 095782     | AP-2 comple | 6.14124872    | 6 | 7  | 3 | 107.5 | 7.03  | 195 | 6 |
| P49207     | 60S ribosom | 37.6068376    | 7 | 8  | 7 | 13.3  | 11.47 | 149 | 7 |
| X5DNM4     | Lactoylglut | 45.6521739    | 7 | 10 | 7 | 20.8  | 5.31  | 132 | 7 |
| P21266     | Glutathione | 28.4444444    | 6 | 6  | 6 | 26.5  | 5.54  | 107 | 6 |
| Q96HE7     | ER01-like p | 10.042735     | 4 | 5  | 4 | 54.4  | 5.68  | 174 | 4 |
| A8K3Q9     | cDNA FLJ76  | 17.1296296    | 3 | 6  | 1 | 23.4  | 10.93 | 179 | 3 |
| Q8TC12     | Retinol def | 21.6981132    | 5 | 5  | 5 | 35.4  | 8.82  | 110 | 5 |
| Q8TEQ6     | Gem-associ  | 5.37135279    | 7 | 7  | 7 | 168.5 | 6.62  | 108 | 7 |
| P55010     | Eukaryotic  | 15.3132251    | 6 | 7  | 6 | 49.2  | 5.58  | 68  | 6 |
| Q9BUP3     | Oxidoreduct | 31.4049587    | 8 | 8  | 8 | 27    | 8.38  | 95  | 8 |
| J3QRS3     | Myosin reg  | 28.8135593    | 5 | 6  | 5 | 20.4  | 4.75  | 173 | 5 |
| P05114     | Non-histone | 55            | 3 | 4  | 3 | 10.7  | 9.6   | 126 | 3 |
| 000231     | 26S proteas | 15.1658768    | 6 | 6  | 6 | 47.4  | 6.48  | 104 | 6 |
| Q53FE8     | cDNA FLJ36  | 17.8378378    | 5 | 6  | 5 | 40.5  | 5.14  | 71  | 5 |
| P56537     | Eukaryotic  | 18.7755102    | 3 | 4  | 3 | 26.6  | 4.68  | 173 | 3 |
| P00387     | NADH-cytoch | 11.9601329    | 4 | 5  | 4 | 34.2  | 7.59  | 119 | 4 |
| MOQYS1     | 60S ribosom | 23.3333333    | 7 | 11 | 7 | 24.2  | 10.86 | 126 | 7 |
| A8K5K0     | cDNA FLJ78  | 5.8411215     | 4 | 5  | 4 | 95.6  | 7.62  | 83  | 4 |
| B4DYR6     | cDNA FLJ56  | 8.12581913    | 5 | 6  | 5 | 85.3  | 8.87  | 68  | 5 |
| D6REX3     | Protein trε | 4.31654676    | 5 | 6  | 5 | 136.1 | 6.98  | 130 | 5 |
| P18085     | ADP-ribosyl | 24.4444444    | 4 | 4  | 3 | 20.5  | 7.14  | 152 | 4 |
| 075340     | Programmed  | 19.3717277    | 3 | 4  | 3 | 21.9  | 5.4   | 122 | 3 |
| P07305     | Histone H1  | 23.7113402    | 5 | 5  | 5 | 20.9  | 10.84 | 143 | 5 |
| AOA0AOMRR7 | UI small nt | 16.6666667    | 2 | 3  | 2 | 19.7  | 9.58  | 135 | 2 |
| B1AKJ5     | Nardilysin  | 5.414274      | 6 | 6  | 6 | 139.3 | 5     | 136 | 6 |
| P40222     | Alpha-taxil | 20.3296703    | 6 | 6  | 6 | 61.9  | 6.52  | 103 | 6 |
| P54727     | UV excisior | 14.4254279    | 7 | 8  | 7 | 43.1  | 4.84  | 122 | 7 |
| Q9BXP5     | Serrate RN  | 6.16438356    | 7 | 8  | 7 | 100.6 | 5.96  | 89  | 7 |
| Q13126     | S-methyl-5' | 29.6819788    | 6 | 7  | 6 | 31.2  | 7.18  | 40  | 6 |
| P04899     | Guanine nuc | 12.9577465    | 4 | 5  | 1 | 40.4  | 5.54  | 115 | 4 |
| B3KNC3     | cDNA FLJ14  | 9.34579439    | 7 | 7  | 7 | 84.9  | 5.62  | 106 | 7 |
| B2R6U8     | cDNA, FLJ9  | 20.2643172    | 4 | 4  | 4 | 26.2  | 8.82  | 108 | 4 |
| Q15819     | Ubiquitin-c | 35.862069     | 5 | 6  | 2 | 16.4  | 8.09  | 159 | 5 |
| P36507     | Dual specif | 11.25         | 4 | 5  | 2 | 44.4  | 6.55  | 91  | 4 |
| P53701     | Cytochrome  | 22.761194     | 5 | 6  | 5 | 30.6  | 6.68  | 87  | 5 |
| P36957     | Dihydrolip  | 10.1545254    | 4 | 4  | 4 | 48.7  | 8.95  | 129 | 4 |
| Q59G24     | Activated f | 46.2686567    | 5 | 5  | 5 | 15.1  | 9.38  | 110 | 5 |
| Q6FHV6     | ENO2 protei | 14.0552995    | 5 | 6  | 4 | 47.2  | 5.03  | 107 | 5 |
| B2R802     | cDNA, FLJ9  | 26.5957447    | 6 | 6  | 5 | 31.3  | 9.86  | 86  | 6 |
| Q5T9A4     | ATPase fami | 11.5740741    | 7 | 8  | 2 | 72.5  | 9.2   | 69  | 7 |
| Q96FQ6     | Protein S1  | 47.5728155    | 6 | 6  | 6 | 11.8  | 6.79  | 111 | 6 |
| P61026     | Ras-relatec | 24            | 5 | 7  | 3 | 22.5  | 8.38  | 209 | 5 |



|            |                         |   |    |   |       |       |     |   |
|------------|-------------------------|---|----|---|-------|-------|-----|---|
| Q52LJ0     | Protein FA15.4545455    | 4 | 4  | 4 | 37.2  | 6.29  | 131 | 4 |
| H9ZYJ2     | Thioredoxin 34.2857143  | 3 | 5  | 3 | 11.7  | 4.92  | 98  | 3 |
| Q9NZ45     | CDGSH iron-36.1111111   | 4 | 7  | 4 | 12.2  | 9.09  | 67  | 4 |
| Q53Y97     | Thymidylate 19.8083067  | 5 | 6  | 5 | 35.7  | 7.01  | 160 | 5 |
| Q8IY81     | pre-rRNA p11.0979929    | 7 | 7  | 7 | 96.5  | 8.4   | 118 | 7 |
| Q8TCS8     | Polyribonuc 8.93997446  | 6 | 7  | 6 | 85.9  | 7.77  | 54  | 6 |
| P61326     | Protein mag 36.3013699  | 5 | 7  | 5 | 17.2  | 6.11  | 66  | 5 |
| Q9Y2Z0     | Protein SG121.0958904   | 6 | 6  | 6 | 41    | 5.16  | 82  | 6 |
| Q15907     | Ras-related 31.6513761  | 7 | 7  | 7 | 24.5  | 5.94  | 130 | 7 |
| Q9UHD9     | Ubiquilin-7.69230769    | 4 | 5  | 1 | 65.7  | 5.22  | 114 | 4 |
| Q6FGS1     | TPD52L2 prc 42.2330097  | 5 | 6  | 5 | 22.2  | 5.36  | 93  | 5 |
| Q9NUU7     | ATP-depend 13.8075314   | 7 | 8  | 7 | 53.9  | 6.58  | 133 | 7 |
| P19623     | Spermidine 21.192053    | 6 | 7  | 6 | 33.8  | 5.49  | 92  | 6 |
| Q9Y6K5     | 2'-5'-olig 7.17571297   | 7 | 7  | 7 | 121.1 | 8.4   | 69  | 7 |
| Q6IAW5     | CALU protei 26.984127   | 7 | 7  | 7 | 37.1  | 4.64  | 90  | 7 |
| Q8N1G4     | Leucine-ric 14.2367067  | 6 | 6  | 6 | 63.4  | 8.28  | 100 | 6 |
| P62244     | 40S ribosom 37.6923077  | 6 | 8  | 6 | 14.8  | 10.13 | 161 | 6 |
| Q12874     | Splicing fa 14.1716567  | 6 | 6  | 6 | 58.8  | 5.38  | 70  | 6 |
| P61204     | ADP-ribosyl 27.6243094  | 4 | 5  | 2 | 20.6  | 7.43  | 214 | 4 |
| A8K964     | cDNA FLJ757.81032078    | 5 | 6  | 5 | 81.5  | 7.37  | 103 | 5 |
| Q8IVT2     | Mitotic int 7.36377025  | 4 | 4  | 4 | 75.3  | 6.83  | 151 | 4 |
| H0YMV8     | 40S ribosom 32          | 3 | 4  | 1 | 11.3  | 9.32  | 137 | 3 |
| P21399     | Cytoplasmic 8.66141732  | 7 | 7  | 7 | 98.3  | 6.68  | 82  | 7 |
| Q9Y5A9     | YTH domain-9.32642487   | 5 | 5  | 3 | 62.3  | 8.79  | 114 | 5 |
| Q7L9L4     | MOB kinase 19.4444444   | 4 | 6  | 4 | 25.1  | 6.73  | 86  | 4 |
| Q4G0N4     | NAD kinase 14.0271493   | 5 | 5  | 5 | 49.4  | 8.18  | 109 | 5 |
| O75947     | ATP synthase 31.0559006 | 5 | 5  | 5 | 18.5  | 5.3   | 114 | 5 |
| O75489     | NADH dehydr 12.5        | 3 | 3  | 3 | 30.2  | 7.5   | 143 | 3 |
| AOA087X1Z3 | Proteasome 25.984252    | 6 | 7  | 6 | 29.1  | 6.71  | 90  | 6 |
| Q969H8     | Myeloid-dei 21.9653179  | 3 | 5  | 3 | 18.8  | 6.68  | 90  | 3 |
| Q6YN16     | Hydroxyster 14.8325359  | 5 | 5  | 5 | 45.4  | 7.99  | 98  | 5 |
| Q96CW1     | AP-2 compl 17.9310345   | 8 | 8  | 8 | 49.6  | 9.54  | 105 | 8 |
| Q6LES2     | Annexin (F) 14.3302181  | 4 | 4  | 4 | 36.1  | 6.13  | 149 | 4 |
| Q08ES8     | Cell growth 23.7288136  | 4 | 7  | 1 | 20.1  | 9.6   | 181 | 4 |
| Q9GZT3     | SRA stem-lc 42.2018349  | 4 | 5  | 4 | 12.3  | 10.24 | 105 | 4 |
| BOYIW6     | Archain 1, 13.2246377   | 7 | 8  | 7 | 61.6  | 5.85  | 107 | 7 |
| P55263     | Adenosine 15.7458564    | 5 | 6  | 5 | 40.5  | 6.7   | 123 | 5 |
| AOA140VJMO | Testicular 5.61370124   | 5 | 6  | 5 | 116.5 | 6.77  | 95  | 5 |
| Q9HCE1     | Putative he 5.18444666  | 5 | 5  | 5 | 113.6 | 8.82  | 120 | 5 |
| P62851     | 40S ribosom 24          | 4 | 7  | 4 | 13.7  | 10.11 | 270 | 4 |
| A8K9U0     | cDNA FLJ7821.1538462    | 6 | 6  | 6 | 40.3  | 7.08  | 129 | 6 |
| Q96G03     | Phosphogluc 13.0718954  | 5 | 5  | 5 | 68.2  | 6.73  | 79  | 5 |
| Q59ER5     | WD repeat-c 13.4615385  | 7 | 7  | 7 | 68.1  | 7.23  | 132 | 7 |
| P20020     | Plasma mem 4.37201908   | 5 | 5  | 1 | 138.7 | 6.04  | 121 | 5 |
| B5BUB1     | RuvB-like 16.4473684    | 6 | 6  | 6 | 50.2  | 6.42  | 120 | 6 |
| Q13098     | COP9 signall 5.2749491  | 7 | 7  | 7 | 55.5  | 6.74  | 75  | 7 |
| O14828     | Secretory c 9.22190202  | 2 | 3  | 2 | 38.3  | 7.64  | 120 | 2 |
| Q9HDC9     | Adipocyte p 17.5480769  | 6 | 6  | 6 | 46.5  | 6.16  | 111 | 6 |
| Q8IYD1     | Eukaryotic 11.3057325   | 7 | 7  | 7 | 68.8  | 5.43  | 138 | 7 |
| P09661     | U2 small nt 23.1372549  | 5 | 5  | 5 | 28.4  | 8.62  | 91  | 5 |
| P42677     | 40S ribosom 40.4761905  | 3 | 5  | 1 | 9.5   | 9.45  | 121 | 3 |
| P33316     | Deoxyuridir 21.031746   | 4 | 7  | 4 | 26.5  | 9.36  | 104 | 4 |
| Q16762     | Thiosulfate 28.2828283  | 6 | 6  | 6 | 33.4  | 7.25  | 94  | 6 |
| Q7L0Y3     | Mitochondri 16.6253102  | 5 | 5  | 5 | 47.3  | 9.36  | 111 | 5 |
| P30520     | Adenylosucc 14.9122807  | 5 | 5  | 5 | 50.1  | 6.55  | 90  | 5 |
| P25398     | 40S ribosom 28.7878788  | 4 | 8  | 4 | 14.5  | 7.21  | 183 | 4 |
| P48735     | Isocitrate 11.2831858   | 5 | 5  | 4 | 50.9  | 8.69  | 117 | 5 |
| P62136     | Serine/thr 16.3636364   | 5 | 7  | 2 | 37.5  | 6.33  | 123 | 5 |
| AOA140VJJ2 | S-formylgl 18.0851064   | 4 | 4  | 4 | 31.4  | 7.02  | 84  | 4 |
| P35527     | Keratin, ty 15.2487961  | 5 | 5  | 4 | 62    | 5.24  | 116 | 5 |
| Q13011     | Delta(3,5)- 21.3414634  | 5 | 5  | 5 | 35.8  | 8     | 97  | 5 |
| AOA140VJK1 | Testicular 23.5820896   | 7 | 7  | 7 | 37.4  | 5.39  | 92  | 7 |
| P18583     | Protein S0 4.69909316   | 7 | 12 | 7 | 263.7 | 5.64  | 105 | 7 |
| Q02978     | Mitochondri 10.1910828  | 2 | 3  | 2 | 34    | 9.91  | 176 | 2 |
| Q5U0I6     | H. sapiens 128.2926829  | 5 | 7  | 1 | 22.7  | 6.21  | 203 | 5 |
| P49721     | Proteasome 22.8855721   | 5 | 6  | 5 | 22.8  | 7.02  | 104 | 5 |
| Q7L2E3     | Putative A15.02512563   | 7 | 7  | 7 | 133.9 | 8.78  | 70  | 7 |
| Q5JSH3     | WD repeat-c 8.10514786  | 6 | 6  | 6 | 101.3 | 5.45  | 94  | 6 |
| AOA087WY31 | YTH domain-7.99319728   | 4 | 5  | 2 | 64.5  | 8.24  | 105 | 4 |
| O75223     | Gamma-glute 23.9361702  | 4 | 5  | 4 | 21    | 5.14  | 132 | 4 |
| P61586     | Transformir 18.134715   | 3 | 5  | 3 | 21.8  | 6.1   | 131 | 3 |
| Q16401     | 26S protease 12.5       | 6 | 6  | 6 | 56.2  | 5.48  | 115 | 6 |
| AOA024R3J1 | Tripartite 11.0544218   | 5 | 5  | 5 | 65.8  | 7.15  | 126 | 5 |

|            |             |              |   |   |   |       |       |     |   |
|------------|-------------|--------------|---|---|---|-------|-------|-----|---|
| Q00653     | Nuclear fac | 6.7777778    | 6 | 6 | 6 | 96.7  | 6.25  | 125 | 6 |
| P61081     | NEDD8-conj  | 27.3224044   | 6 | 6 | 6 | 20.9  | 7.69  | 70  | 6 |
| P54819     | Adenylate   | 121.7573222  | 6 | 9 | 6 | 26.5  | 7.81  | 70  | 6 |
| P62316     | Small nucl  | 24.5762712   | 3 | 6 | 3 | 13.5  | 9.91  | 170 | 3 |
| Q13151     | Heterogene  | 11.8032787   | 4 | 6 | 2 | 30.8  | 9.29  | 194 | 4 |
| B2RDF5     | cDNA, FLJ9  | 10.46875     | 6 | 6 | 6 | 71.1  | 5.29  | 77  | 6 |
| P56199     | Integrin a  | 5.00424088   | 6 | 6 | 6 | 130.8 | 6.29  | 103 | 6 |
| Q96124     | Far upstre  | 12.5874126   | 6 | 6 | 5 | 61.6  | 8.38  | 108 | 6 |
| P61956     | Small ubiq  | 33.6842105   | 3 | 4 | 3 | 10.9  | 5.5   | 144 | 3 |
| O95817     | BAG family  | 8.52173913   | 4 | 5 | 4 | 61.6  | 6.95  | 112 | 4 |
| Q8WU90     | Zinc finger | 11.971831    | 4 | 4 | 4 | 48.6  | 5.31  | 139 | 4 |
| Q59EL4     | PRPF4 prote | 12.1042831   | 5 | 5 | 5 | 60    | 7.56  | 84  | 5 |
| V9HWI3     | Cathepsin I | 15.2912621   | 6 | 7 | 6 | 44.5  | 6.54  | 120 | 6 |
| AOA024R6S1 | DnaJ (Hsp4  | 9.95145631   | 4 | 5 | 4 | 45.7  | 6.48  | 96  | 4 |
| Q6IAX2     | RPL21 prote | 26.25        | 4 | 7 | 4 | 18.6  | 10.49 | 77  | 4 |
| B5BU61     | Histone de  | 6.84647303   | 3 | 4 | 1 | 55    | 5.48  | 117 | 3 |
| P48960     | CD97 anti   | 3.11377246   | 2 | 3 | 2 | 91.8  | 6.87  | 102 | 2 |
| A8K5Y7     | cDNA FLJ7   | 5.23255814   | 7 | 7 | 7 | 136.2 | 5.9   | 93  | 7 |
| Q9UKD2     | mRNA turn   | 29.707113    | 7 | 7 | 7 | 27.5  | 8.29  | 105 | 7 |
| AOA024R1Q8 | Ribosomal   | 137.8571429  | 4 | 7 | 4 | 14.9  | 10.51 | 109 | 4 |
| P46781     | 40S ribos   | 30.9278351   | 8 | 9 | 8 | 22.6  | 10.65 | 117 | 8 |
| V9HW91     | Epididymis  | 15.942029    | 4 | 4 | 4 | 30.6  | 7.21  | 91  | 4 |
| Q9H223     | EH domain   | -11.6451017  | 5 | 5 | 5 | 61.1  | 6.76  | 83  | 5 |
| AOA024R1U2 | PHD finger  | 40           | 4 | 4 | 4 | 12.4  | 8.41  | 152 | 4 |
| B8ZZN6     | Small ubiq  | 19.1780822   | 2 | 3 | 2 | 16.6  | 6.2   | 113 | 2 |
| Q96HC4     | PDZ and LIM | 13.7583893   | 6 | 6 | 6 | 63.9  | 8.21  | 89  | 6 |
| Q9H444     | Charged mu  | 119.1964286  | 4 | 4 | 4 | 24.9  | 4.82  | 135 | 4 |
| Q6FID4     | SARA1 prote | 22.7272727   | 4 | 4 | 4 | 22.3  | 7.03  | 103 | 4 |
| AOA140VKE1 | Testis tis  | 8.65191147   | 4 | 5 | 1 | 55.6  | 7.88  | 127 | 4 |
| Q96EN8     | Molybdenum  | 8.67117117   | 7 | 7 | 7 | 98.1  | 6.7   | 52  | 7 |
| V9HW12     | Epididymis  | 23.7373737   | 5 | 8 | 4 | 21.9  | 5.97  | 174 | 5 |
| J3KQ48     | Peptidyl-tf | 18.3333333   | 2 | 4 | 2 | 19.3  | 8.73  | 68  | 2 |
| Q8WX93     | Palladin O  | 54.04916847  | 5 | 6 | 5 | 150.5 | 7.09  | 148 | 5 |
| P26447     | Protein S1  | 38.6138614   | 4 | 7 | 4 | 11.7  | 6.11  | 168 | 4 |
| P40261     | Nicotinami  | 12.8787879   | 4 | 5 | 4 | 29.6  | 5.74  | 108 | 4 |
| Q13057     | Bifunction  | 11.7021277   | 6 | 7 | 6 | 62.3  | 6.99  | 90  | 6 |
| Q9HAV7     | GrpE prote  | 25.8064516   | 5 | 6 | 5 | 24.3  | 8.12  | 77  | 5 |
| O94973     | AP-2 comple | 5.4313099    | 5 | 6 | 2 | 103.9 | 6.96  | 97  | 5 |
| Q9Y3E8     | CGI-150 pr  | 11.3095238   | 5 | 6 | 5 | 55    | 8.7   | 127 | 5 |
| B2R6E2     | cDNA, FLJ9  | 9.1684435    | 3 | 3 | 3 | 51.6  | 5.25  | 107 | 3 |
| Q13243     | Serine/argi | 15.4411765   | 4 | 7 | 3 | 31.2  | 11.59 | 116 | 4 |
| Q32P28     | Prolyl 3-h  | 5.57065217   | 3 | 3 | 3 | 83.3  | 5.14  | 78  | 3 |
| E9PB61     | THO comple  | 10.9848485   | 2 | 3 | 2 | 27.5  | 11.05 | 81  | 2 |
| P20962     | Parathyrosi | 22.5490196   | 2 | 3 | 2 | 11.5  | 4.16  | 100 | 2 |
| P20339     | Ras-relate  | 21.3953488   | 4 | 4 | 1 | 23.6  | 8.15  | 97  | 4 |
| P07741     | Adenine ph  | 27.2222222   | 4 | 4 | 4 | 19.6  | 6.02  | 105 | 4 |
| O60216     | Double-str  | 9.98415214   | 6 | 6 | 6 | 71.6  | 4.65  | 99  | 6 |
| V9HW87     | Abhydrolas  | 14.7619048   | 3 | 4 | 3 | 22.3  | 6.4   | 136 | 3 |
| P84085     | ADP-ribosy  | 129.4444444  | 5 | 5 | 3 | 20.5  | 6.79  | 104 | 5 |
| P63096     | Guanine nuc | 12.1468927   | 4 | 4 | 1 | 40.3  | 5.97  | 115 | 4 |
| P08574     | Cytochrome  | 11.6923077   | 3 | 4 | 3 | 35.4  | 9     | 94  | 3 |
| Q13148     | TAR DNA-bi  | 14.2512077   | 5 | 5 | 5 | 44.7  | 6.19  | 109 | 5 |
| Q9UMX0     | Ubiquilin-  | 113.9219015  | 5 | 6 | 2 | 62.5  | 5.11  | 83  | 5 |
| Q92917     | G patch don | 11.5546218   | 4 | 4 | 4 | 52.2  | 6.15  | 90  | 4 |
| P16949     | Stathmin O  | 31.5436242   | 5 | 7 | 5 | 17.3  | 5.97  | 90  | 5 |
| G1UI16     | SCC-112 pr  | 5.53477936   | 5 | 6 | 5 | 150.7 | 7.91  | 171 | 5 |
| P15559     | NAD(P)H de  | 14.2335766   | 4 | 5 | 4 | 30.8  | 8.88  | 110 | 4 |
| P31350     | Ribonucleo  | 5.16.966581  | 5 | 5 | 5 | 44.8  | 5.38  | 88  | 5 |
| O95292     | Vesicle-as  | 20.5761317   | 4 | 5 | 3 | 27.2  | 7.3   | 158 | 4 |
| P62834     | Ras-relate  | 33.1521739   | 6 | 6 | 2 | 21    | 6.67  | 68  | 6 |
| Q92878     | DNA repair  | 4.95426829   | 6 | 6 | 6 | 153.8 | 6.89  | 94  | 6 |
| Q96AG4     | Leucine-ric | 13.6807818   | 4 | 4 | 4 | 34.9  | 9.57  | 96  | 4 |
| J3KQN4     | 60S ribos   | 29.5774648   | 5 | 7 | 1 | 16.4  | 10.43 | 152 | 5 |
| P31689     | DnaJ homo   | 109.06801008 | 3 | 4 | 3 | 44.8  | 7.08  | 120 | 3 |
| O43488     | Aflatoxin I | 15.8774373   | 4 | 4 | 4 | 39.6  | 7.17  | 102 | 4 |
| B2R9H3     | cDNA, FLJ9  | 16.3101604   | 6 | 6 | 5 | 42.7  | 5.47  | 120 | 6 |
| Q59GR1     | Niemann-Pi  | 4.18929403   | 4 | 4 | 4 | 143.1 | 5.45  | 96  | 4 |
| B3KML1     | cDNA FLJ1   | 11.9460501   | 5 | 5 | 5 | 58.4  | 5.06  | 46  | 5 |
| O60869     | Endothelial | 37.1621622   | 5 | 9 | 5 | 16.4  | 9.95  | 123 | 5 |
| AOA024R4E5 | High densi  | 4.7318612    | 6 | 6 | 6 | 141.4 | 6.87  | 72  | 6 |
| J3KQJ1     | Sulfatase-n | 16.5625      | 4 | 4 | 4 | 35.9  | 9.19  | 80  | 4 |
| Q9UJU6     | Drebrin-li  | 14.1860465   | 5 | 5 | 5 | 48.2  | 5.05  | 93  | 5 |
| X6R5Z6     | Cytochrome  | 26.4516129   | 3 | 4 | 3 | 18    | 10.1  | 72  | 3 |

|            |                                            |   |   |   |       |       |     |   |
|------------|--------------------------------------------|---|---|---|-------|-------|-----|---|
| A8K6D2     | cDNA FLJ76618.0327869                      | 4 | 4 | 4 | 26.7  | 9.17  | 127 | 4 |
| O95218     | Zinc finger14.8484848                      | 5 | 5 | 5 | 37.4  | 10.01 | 110 | 5 |
| G5EA30     | CUG triplet7.58754864                      | 3 | 3 | 3 | 55.1  | 8.38  | 76  | 3 |
| Q15637     | Splicing factor7.70266041                  | 5 | 5 | 5 | 68.3  | 8.98  | 118 | 5 |
| Q7Z2K6     | Endoplasmic6.96902655                      | 5 | 5 | 5 | 100.2 | 7.52  | 65  | 5 |
| O60502     | Protein O-4.14847162                       | 4 | 4 | 4 | 102.8 | 4.91  | 112 | 4 |
| P16070     | CD44 antigen6.06469003                     | 4 | 6 | 4 | 81.5  | 5.33  | 209 | 4 |
| Q9BQA1     | Methylosome13.4502924                      | 4 | 5 | 4 | 36.7  | 5.17  | 99  | 4 |
| Q9H0A0     | RNA cytidine.26829268                      | 6 | 6 | 6 | 115.7 | 8.27  | 75  | 6 |
| O96019     | Actin-like11.8881119                       | 4 | 4 | 4 | 47.4  | 5.6   | 73  | 4 |
| Q14247     | Src substrate13.6363636                    | 6 | 7 | 6 | 61.5  | 5.4   | 77  | 6 |
| AOA0A0MSE2 | Hydroxyacyl10.2564103                      | 4 | 4 | 4 | 42.1  | 9.26  | 144 | 4 |
| B7ZM99     | MTHFD1L precursor6.02655771                | 5 | 5 | 5 | 105.8 | 8.06  | 98  | 5 |
| O43290     | U4/U6.U5 tripartite6.25                    | 4 | 4 | 4 | 90.2  | 6.13  | 96  | 4 |
| P26196     | Probable A113.4575569                      | 5 | 7 | 5 | 54.4  | 8.66  | 82  | 5 |
| Q9NWH9     | SAFB-like12.99806576                       | 3 | 3 | 3 | 117.1 | 7.87  | 69  | 3 |
| Q86U42     | Polyadenylated7.51633987                   | 2 | 2 | 2 | 32.7  | 5.06  | 114 | 2 |
| B4DRM3     | cDNA FLJ5488.76623377                      | 4 | 4 | 4 | 69.7  | 5.67  | 98  | 4 |
| Q59GW7     | Replicator10.2564103                       | 3 | 4 | 3 | 39.6  | 7.81  | 72  | 3 |
| P42771     | Cyclin-dependent18.5897436                 | 2 | 3 | 2 | 16.5  | 5.81  | 119 | 2 |
| Q5T8P6     | RNA-binding4.56802383                      | 4 | 4 | 4 | 113.5 | 9.16  | 110 | 4 |
| P14923     | Junction protein9.26174497                 | 5 | 5 | 5 | 81.7  | 6.14  | 38  | 5 |
| AOA087WWF6 | DNA polymerase10.515873                    | 4 | 4 | 4 | 54.7  | 5.95  | 101 | 4 |
| Q9UL25     | Ras-related12.4444444                      | 2 | 2 | 2 | 24.3  | 7.94  | 124 | 2 |
| B2RNR6     | Zinc finger5.12104283                      | 4 | 4 | 4 | 116.9 | 9.04  | 94  | 4 |
| Q969Q0     | 60S ribosome39.6226415                     | 6 | 8 | 2 | 12.5  | 10.65 | 108 | 6 |
| Q15019     | Septin-2 ortholog19.1135734                | 5 | 5 | 5 | 41.5  | 6.6   | 82  | 5 |
| Q5JWF2     | Guanine nucleoside3.27868852               | 3 | 3 | 2 | 111   | 5.03  | 123 | 3 |
| Q15370     | Elongin-B (24.5762712                      | 4 | 5 | 4 | 13.1  | 4.88  | 113 | 4 |
| Q9Y305     | Acyl-coenzyme12.9840547                    | 5 | 5 | 5 | 49.9  | 8.6   | 88  | 5 |
| P26358     | DNA (cytosine)3.52722772                   | 5 | 5 | 5 | 183.1 | 7.75  | 91  | 5 |
| P25815     | Protein S1C34.7368421                      | 4 | 6 | 4 | 10.4  | 4.88  | 156 | 4 |
| O43615     | Mitochondrial10.840708                     | 4 | 4 | 4 | 51.3  | 8.32  | 114 | 4 |
| Q14558     | Phosphoric11.5168539                       | 3 | 3 | 3 | 39.4  | 7.2   | 58  | 3 |
| Q92930     | Ras-related23.6714976                      | 5 | 7 | 3 | 23.6  | 9.07  | 179 | 5 |
| Q8WUM0     | Nuclear pore7.69896194                     | 7 | 7 | 7 | 128.9 | 5.1   | 79  | 7 |
| B4E074     | cDNA FLJ5887.37527115                      | 3 | 3 | 1 | 50.7  | 6.98  | 86  | 3 |
| B2R657     | Annexin OS-7.37704918                      | 3 | 3 | 3 | 52.6  | 5.52  | 88  | 3 |
| AOA0K0K1K7 | 6-phosphogluconate25.5813953               | 5 | 7 | 5 | 27.5  | 6.05  | 53  | 5 |
| O00629     | Importin subunit4.60652591                 | 2 | 3 | 2 | 57.9  | 4.96  | 83  | 2 |
| E9PCR7     | 2-oxoglutarate5.29865125                   | 5 | 5 | 5 | 117.6 | 6.92  | 112 | 5 |
| P42224     | Signal transducer6.53333333                | 5 | 5 | 5 | 87.3  | 6.05  | 86  | 5 |
| Q6FGH9     | DNCL1 protein24.7191011                    | 2 | 3 | 2 | 10.4  | 7.4   | 67  | 2 |
| P52294     | Importin subunit9.66542751                 | 4 | 4 | 1 | 60.2  | 5.01  | 90  | 4 |
| Q53GL6     | RNA binding29.3159609                      | 5 | 5 | 5 | 32.5  | 9.17  | 97  | 5 |
| AOA140VJK2 | Glycerol-3-phosphate9.90371389             | 6 | 6 | 6 | 80.8  | 7.53  | 66  | 6 |
| A6NEM2     | Host cell13.07692308                       | 5 | 5 | 5 | 213.3 | 7.33  | 75  | 5 |
| Q15942     | Zyxin OS-Hc13.2867133                      | 5 | 6 | 5 | 61.2  | 6.67  | 43  | 5 |
| Q08257     | Quinone oxidoreductase9.4224924            | 2 | 3 | 2 | 35.2  | 8.44  | 66  | 2 |
| B4E0X1     | Beta-2-microglobulin18.852459              | 3 | 4 | 3 | 13.9  | 7.44  | 128 | 3 |
| P15529     | Membrane component10.7142857               | 4 | 7 | 4 | 43.7  | 6.74  | 114 | 4 |
| Q6IB11     | PGRMC1 protein40.5128205                   | 6 | 7 | 5 | 21.7  | 4.7   | 63  | 6 |
| P50570     | Dynamin-2 (7.81609195                      | 6 | 6 | 6 | 98    | 7.44  | 72  | 6 |
| Q9UBU9     | Nuclear RNA9.20840065                      | 4 | 4 | 4 | 70.1  | 8.51  | 71  | 4 |
| Q9Y295     | Developmental20.1634877                    | 5 | 5 | 5 | 40.5  | 8.9   | 71  | 5 |
| V9GYM8     | Rho guanine nucleotide4.36469447           | 4 | 4 | 4 | 116   | 7.37  | 97  | 4 |
| P46776     | 60S ribosome27.7027027                     | 4 | 9 | 4 | 16.6  | 11    | 140 | 4 |
| O43237     | Cytoplasmic12.601626                       | 5 | 6 | 5 | 54.1  | 6.38  | 72  | 5 |
| Q6P2E9     | Enhancer of zeste3.9971449                 | 5 | 5 | 5 | 151.6 | 5.86  | 72  | 5 |
| Q9H074     | Polyadenylated8.14196242                   | 4 | 5 | 4 | 53.5  | 4.81  | 105 | 4 |
| Q5LJA9     | Ubiquitin (16.8478261                      | 6 | 7 | 6 | 41.7  | 5.53  | 85  | 6 |
| P61513     | 60S ribosome41.3043478                     | 3 | 6 | 3 | 10.3  | 10.43 | 89  | 3 |
| Q12797     | Aspartyl aminotransferase6.86015831        | 5 | 5 | 5 | 85.8  | 5.01  | 64  | 5 |
| Q15020     | Squamous cell carcinoma5.81516096          | 4 | 4 | 4 | 109.9 | 5.57  | 78  | 4 |
| Q9H6R4     | Nucleolar protein4.88656195                | 4 | 5 | 4 | 127.5 | 7.64  | 62  | 4 |
| P08648     | Integrin alpha6.10104862                   | 5 | 5 | 5 | 114.5 | 5.77  | 84  | 5 |
| P28838     | Cytosolic aminotransferase10.2119461       | 4 | 4 | 4 | 56.1  | 7.93  | 79  | 4 |
| Q13404     | Ubiquitin-c30.6122449                      | 5 | 6 | 2 | 16.5  | 7.93  | 116 | 5 |
| R4GN18     | Membrane component19.2307692               | 2 | 2 | 2 | 8.5   | 9.07  | 105 | 2 |
| K7ES00     | Histone H3.17.8807947                      | 3 | 5 | 1 | 16.6  | 11.84 | 98  | 3 |
| AOA087WYT3 | Prostaglandin synthase25.6097561           | 4 | 5 | 4 | 19.1  | 4.55  | 107 | 4 |
| P11177     | Pyruvate dehydrogenase15.0417827           | 4 | 4 | 4 | 39.2  | 6.65  | 84  | 4 |
| Q92900     | Regulator of G-protein signaling5.75730735 | 6 | 6 | 6 | 124.3 | 6.61  | 72  | 6 |

|            |              |             |   |   |   |       |       |     |   |
|------------|--------------|-------------|---|---|---|-------|-------|-----|---|
| Q96JB5     | CDK5 regul:  | 9.68379447  | 5 | 5 | 5 | 56.9  | 4.75  | 105 | 5 |
| P10253     | Lysosomal :  | 5.04201681  | 4 | 4 | 4 | 105.3 | 6     | 110 | 4 |
| Q2NL82     | Pre-rRNA-pr  | 6.5920398   | 5 | 5 | 5 | 91.8  | 7.42  | 110 | 5 |
| P42285     | Superkiller  | 3.35892514  | 3 | 3 | 3 | 117.7 | 6.52  | 109 | 3 |
| P08243     | Asparagine   | 10.516934   | 5 | 5 | 5 | 64.3  | 6.86  | 100 | 5 |
| Q14554     | Protein di:  | 11.9460501  | 6 | 6 | 6 | 59.6  | 7.91  | 94  | 6 |
| AOA0A0MSV9 | Tapasin OS:  | 4.76190476  | 2 | 3 | 2 | 53.9  | 7.08  | 75  | 2 |
| Q9UKY7     | Nuclear poi  | 11.965812   | 4 | 4 | 4 | 50.1  | 7.06  | 78  | 4 |
| E9PR17     | CD59 glyco   | 15.3846154  | 2 | 4 | 2 | 14.5  | 7.77  | 96  | 2 |
| A6NHR9     | Structural   | 2.89276808  | 4 | 4 | 4 | 226.2 | 7.3   | 73  | 4 |
| Q8WXI9     | Transcripti  | 9.94940978  | 4 | 4 | 3 | 65.2  | 9.7   | 67  | 4 |
| P34896     | Serine hydi  | 10.1449275  | 4 | 5 | 4 | 53    | 7.71  | 88  | 4 |
| Q6IBR2     | FARSLA prot  | 7.28346457  | 4 | 4 | 4 | 57.5  | 7.8   | 106 | 4 |
| AOA140VJZ1 | Ubiquitiny   | 16.87645688 | 5 | 5 | 5 | 95.7  | 5.03  | 105 | 5 |
| P05026     | Sodium/pot:  | 13.2013201  | 3 | 4 | 3 | 35    | 8.53  | 95  | 3 |
| Q9NPD3     | Exosome con  | 8.16326531  | 2 | 3 | 2 | 26.4  | 6.52  | 81  | 2 |
| Q15286     | Ras-relatec  | 19.4029851  | 4 | 6 | 2 | 23    | 8.29  | 162 | 4 |
| Q15785     | Mitochondri  | 20.3883495  | 5 | 5 | 5 | 34.5  | 8.98  | 79  | 5 |
| P46063     | ATP-depende  | 7.39599384  | 4 | 5 | 4 | 73.4  | 7.88  | 95  | 4 |
| Q8NE91     | TM4SF1 prot  | 3.87931034  | 1 | 4 | 1 | 25    | 6.37  | 81  | 1 |
| 075937     | DnaJ homolc  | 16.6007905  | 3 | 4 | 3 | 29.8  | 9.06  | 70  | 3 |
| Q9Y678     | Coatomer st  | 7.32265446  | 5 | 5 | 5 | 97.7  | 5.47  | 59  | 5 |
| 000425     | Insulin-lii  | 9.67184801  | 5 | 6 | 5 | 63.7  | 8.87  | 113 | 5 |
| Q8WW12     | PEST protec  | 29.7752809  | 4 | 6 | 4 | 18.9  | 7.49  | 69  | 4 |
| Q9NXV6     | CDKN2A-intc  | 12.9310345  | 5 | 5 | 5 | 61.1  | 9.01  | 80  | 5 |
| B3KQ33     | cDNA FLJ327  | 5.36540241  | 6 | 6 | 6 | 118.7 | 4.96  | 48  | 6 |
| P61163     | Alpha-centr  | 12.7659574  | 3 | 3 | 2 | 42.6  | 6.64  | 60  | 3 |
| Q5RKV6     | Exosome con  | 13.2352941  | 3 | 3 | 3 | 28.2  | 6.28  | 101 | 3 |
| Q06203     | Amidophospl  | 12.3791103  | 5 | 5 | 5 | 57.4  | 6.76  | 77  | 5 |
| Q96CT7     | Coiled-coil  | 24.6636771  | 5 | 5 | 5 | 25.8  | 9.54  | 74  | 5 |
| J3KN16     | KIAA0368 O:  | 2.03272186  | 4 | 4 | 4 | 223.6 | 8.75  | 125 | 4 |
| Q9Y277     | Voltage-dep  | 11.6607774  | 4 | 4 | 4 | 30.6  | 8.66  | 82  | 4 |
| P46459     | Vesicle-fus  | 6.0483871   | 4 | 4 | 4 | 82.5  | 6.95  | 85  | 4 |
| Q9NW13     | RNA-binding  | 6.06060606  | 4 | 4 | 4 | 85.7  | 9.22  | 77  | 4 |
| Q59HE3     | Calpastatir  | 7.90816327  | 5 | 5 | 5 | 84.2  | 5.35  | 82  | 5 |
| Q27J81     | Inverted fc: | 3.52281825  | 4 | 4 | 4 | 135.5 | 5.38  | 96  | 4 |
| B3KMV8     | cDNA FLJ127  | 7.81710914  | 5 | 5 | 5 | 74.7  | 8.38  | 111 | 5 |
| E9PF49     | NADH dehydi  | 19.0045249  | 3 | 3 | 3 | 26.6  | 8.87  | 90  | 3 |
| PODN79     | Cystathioni  | 6.89655172  | 3 | 3 | 3 | 60.5  | 6.65  | 85  | 3 |
| P09132     | Signal recc  | 20.1388889  | 2 | 3 | 2 | 16.1  | 9.85  | 121 | 2 |
| P11172     | Uridine 5'-  | 10.2083333  | 5 | 5 | 5 | 52.2  | 7.24  | 96  | 5 |
| Q549N0     | Cofilin 2    | 24.0963855  | 4 | 6 | 2 | 18.7  | 7.88  | 156 | 4 |
| 094874     | E3 UFM1-prc  | 4.40806045  | 3 | 3 | 3 | 89.5  | 6.79  | 74  | 3 |
| Q00059     | Transcripti  | 17.4796748  | 5 | 6 | 5 | 29.1  | 9.72  | 102 | 5 |
| P10586     | Receptor-ty  | 2.35972732  | 4 | 4 | 4 | 212.7 | 6.3   | 75  | 4 |
| C9JA08     | 60S riboson  | 7.56143667  | 3 | 4 | 3 | 60.1  | 6.62  | 75  | 3 |
| AOA140VJZ4 | Ubiquitin c: | 24.3478261  | 4 | 4 | 4 | 26.2  | 4.92  | 76  | 4 |
| Q99567     | Nuclear poi  | 9.85155196  | 4 | 5 | 4 | 83.5  | 5.69  | 65  | 4 |
| B2R6S5     | UMP-CMP kir  | 19.2982456  | 4 | 6 | 4 | 25.8  | 7.97  | 96  | 4 |
| Q96AC1     | Fermitin f:  | 6.32352941  | 4 | 4 | 4 | 77.8  | 6.7   | 84  | 4 |
| 075436     | Vacuolar pi  | 16.8195719  | 4 | 4 | 4 | 38.1  | 6.57  | 60  | 4 |
| Q9BQ39     | ATP-depende  | 5.69877883  | 3 | 4 | 1 | 82.5  | 9.17  | 63  | 3 |
| P16083     | Ribosyldih   | 21.2121212  | 5 | 5 | 5 | 25.9  | 6.29  | 84  | 5 |
| P30626     | Sorcin OS=   | 22.2222222  | 4 | 4 | 4 | 21.7  | 5.59  | 80  | 4 |
| Q92541     | RNA polymer  | 6.76056338  | 4 | 4 | 4 | 80.3  | 8.15  | 89  | 4 |
| B2R960     | cDNA, FLJ9:  | 29.0657439  | 5 | 5 | 5 | 32.2  | 4.96  | 44  | 5 |
| J3KQ18     | D-dopachron  | 19.6969697  | 2 | 3 | 2 | 14.2  | 7.3   | 104 | 2 |
| Q9BZZ5     | Apoptosis i  | 7.82442748  | 3 | 4 | 3 | 59    | 7.34  | 81  | 3 |
| P51571     | Translocon-  | 19.6531792  | 3 | 5 | 3 | 19    | 6.15  | 122 | 3 |
| Q05048     | Cleavage st  | 10.9048724  | 4 | 4 | 4 | 48.3  | 6.58  | 80  | 4 |
| A8K3R2     | Ribosome bi  | 4.15549598  | 3 | 4 | 3 | 83.5  | 6.13  | 80  | 3 |
| A8K651     | cDNA FLJ757  | 16.6666667  | 3 | 3 | 3 | 31.4  | 4.84  | 60  | 3 |
| Q9BW27     | Nuclear poi  | 9.60365854  | 6 | 6 | 6 | 75    | 5.55  | 78  | 6 |
| Q6IPI1     | 60S riboson  | 14.2857143  | 2 | 5 | 2 | 17.9  | 11.66 | 136 | 2 |
| 095197     | Reticulon-:  | 5.62015504  | 3 | 4 | 3 | 112.5 | 4.96  | 58  | 3 |
| Q9H910     | Hematologic  | 29.4736842  | 4 | 4 | 4 | 20.1  | 9.26  | 62  | 4 |
| Q53Z07     | NPC-A-16 O:  | 18.2291667  | 3 | 4 | 3 | 21.9  | 9.95  | 50  | 3 |
| 043324     | Eukaryotic   | 21.8390805  | 4 | 5 | 4 | 19.8  | 8.54  | 90  | 4 |
| Q9NNW7     | Thioredoxir  | 8.58778626  | 4 | 4 | 4 | 56.5  | 7.5   | 75  | 4 |
| AOA140VKC8 | Testis tis:  | 16.1993769  | 4 | 4 | 4 | 35.9  | 6.6   | 59  | 4 |
| Q96CP2     | FLYWCH fami  | 54.2857143  | 4 | 5 | 4 | 14.6  | 8.46  | 39  | 4 |
| AOA024R6I3 | Testicular   | 7.76255708  | 2 | 3 | 2 | 25    | 7.44  | 70  | 2 |
| P05204     | Non-histone  | 20          | 1 | 2 | 1 | 9.4   | 9.99  | 76  | 1 |

|            |              |              |   |   |   |       |       |     |   |
|------------|--------------|--------------|---|---|---|-------|-------|-----|---|
| Q6FGH5     | RPS21 protc  | 24.0963855   | 3 | 5 | 3 | 9.1   | 8.5   | 72  | 3 |
| O43818     | U3 small nt  | 11.7894737   | 6 | 6 | 6 | 51.8  | 7.85  | 54  | 6 |
| Q8NFH4     | Nucleoporin  | 11.6564417   | 3 | 4 | 3 | 36.7  | 5.92  | 59  | 3 |
| Q9BRA2     | Thioredoxin  | 26.8292683   | 3 | 3 | 3 | 13.9  | 5.52  | 86  | 3 |
| V9HW41     | Epididymis   | 23.0263158   | 5 | 5 | 5 | 17.1  | 6.57  | 86  | 5 |
| Q6P1J9     | Parafibromin | 8.28625235   | 4 | 4 | 4 | 60.5  | 9.61  | 60  | 4 |
| B4DUT8     | Calponin     | 0511.2121212 | 3 | 3 | 3 | 35.9  | 7.3   | 77  | 3 |
| Q9H7E9     | UPF0488 prc  | 17.0305677   | 2 | 2 | 2 | 25    | 9.95  | 66  | 2 |
| Q9NSE4     | Isoleucine-  | 3.26086957   | 3 | 3 | 3 | 113.7 | 7.2   | 89  | 3 |
| Q14694     | Ubiquitin c  | 3.25814536   | 2 | 3 | 2 | 87.1  | 5.31  | 61  | 2 |
| E5KS95     | Elongation   | 10.4615385   | 3 | 3 | 3 | 35.4  | 8.38  | 100 | 3 |
| Q99615     | DnaJ homolc  | 6.68016194   | 3 | 3 | 3 | 56.4  | 6.96  | 73  | 3 |
| AOA0A0MTC1 | E3 ubiquitin | 1.36986301   | 6 | 6 | 6 | 596.1 | 6.42  | 45  | 6 |
| Q15424     | Scaffold at  | 6.01092896   | 4 | 4 | 4 | 102.6 | 5.47  | 20  | 4 |
| B4E1J8     | cDNA FLJ56   | 11.7647059   | 3 | 4 | 3 | 27.2  | 9.66  | 107 | 3 |
| O60493     | Sorting nex  | 30.2469136   | 5 | 6 | 4 | 18.8  | 8.66  | 116 | 5 |
| P62306     | Small nucle  | 24.4186047   | 2 | 5 | 2 | 9.7   | 4.67  | 108 | 2 |
| Q9Y5M8     | Signal rec   | 14.3911439   | 3 | 3 | 3 | 29.7  | 9.04  | 75  | 3 |
| Q9Y6H1     | Coiled-coil  | 33.7748344   | 3 | 3 | 3 | 15.5  | 9.22  | 76  | 3 |
| Q53GW1     | Vesicle tra  | 7.47663551   | 3 | 3 | 3 | 72.3  | 6.38  | 78  | 3 |
| P62081     | 40S ribosom  | 13.4020619   | 4 | 7 | 4 | 22.1  | 10.1  | 106 | 4 |
| P46977     | Dolichyl-di  | 6.24113475   | 5 | 5 | 5 | 80.5  | 8.07  | 64  | 5 |
| P62847     | 40S ribosom  | 14.2857143   | 3 | 6 | 3 | 15.4  | 10.78 | 105 | 3 |
| P30519     | Heme oxygen  | 15.5063291   | 4 | 4 | 4 | 36    | 5.41  | 62  | 4 |
| Q9NVX2     | Notchless p  | 7.42268041   | 3 | 3 | 1 | 53.3  | 7.34  | 64  | 3 |
| Q93008     | Probable ut  | 2.95719844   | 5 | 5 | 5 | 292.1 | 5.8   | 19  | 5 |
| A8KA19     | cDNA FLJ75   | 3.53430353   | 3 | 3 | 3 | 109.8 | 5.39  | 82  | 3 |
| P61019     | Ras-relate   | 17.9245283   | 3 | 3 | 3 | 23.5  | 6.54  | 82  | 3 |
| Q969X6     | U3 small nt  | 5.5393586    | 4 | 4 | 4 | 76.8  | 8.85  | 102 | 4 |
| AOA140VK27 | Leukotrien   | 13.0932897   | 6 | 6 | 6 | 69.2  | 6.18  | 46  | 6 |
| P25685     | DnaJ homolc  | 14.7058824   | 4 | 4 | 4 | 38    | 8.63  | 93  | 4 |
| B2R9X3     | cDNA, FLJ9   | 8.33333333   | 3 | 3 | 3 | 41.8  | 7.12  | 69  | 3 |
| Q01469     | Fatty acid-  | 41.4814815   | 4 | 5 | 4 | 15.2  | 7.01  | 69  | 4 |
| HOYGM0     | Caseinolyti  | 5.8988764    | 3 | 3 | 3 | 80.1  | 8.85  | 79  | 3 |
| L7RXH5     | Mitogen-act  | 10.5540897   | 4 | 4 | 3 | 43.1  | 6.74  | 80  | 4 |
| AOA024ROV4 | Vasodilator  | 10.7894737   | 4 | 4 | 4 | 39.8  | 8.94  | 95  | 4 |
| P05362     | Intercellul  | 8.27067669   | 3 | 3 | 3 | 57.8  | 7.99  | 48  | 3 |
| P61289     | Proteasome   | 11.8110236   | 3 | 4 | 3 | 29.5  | 5.95  | 118 | 3 |
| AOA087WZN1 | Isocitrate   | 9.56072351   | 3 | 3 | 3 | 42.4  | 8.46  | 80  | 3 |
| Q6IA86     | Elongator c  | 6.77966102   | 5 | 5 | 5 | 92.4  | 5.96  | 53  | 5 |
| AOA0S2Z569 | DAZ associ   | 12.7764128   | 3 | 4 | 2 | 43.4  | 8.56  | 53  | 3 |
| Q86X55     | Histone-arg  | 3.61842105   | 2 | 3 | 2 | 65.8  | 6.73  | 81  | 2 |
| P11233     | Ras-relate   | 19.4174757   | 3 | 3 | 3 | 23.6  | 7.11  | 99  | 3 |
| Q7L2H7     | Eukaryotic   | 12.5668449   | 5 | 5 | 5 | 42.5  | 5.63  | 56  | 5 |
| Q9Y3Y2     | Chromatin    | 116.9354839  | 3 | 3 | 3 | 26.4  | 12.23 | 76  | 3 |
| P61086     | Ubiquitin-c  | 15           | 4 | 4 | 4 | 22.4  | 5.44  | 103 | 4 |
| B5BU08     | U2 small nt  | 12.5         | 3 | 3 | 3 | 27.9  | 8.54  | 92  | 3 |
| G3V5T9     | Cyclin-depe  | 11.5606936   | 4 | 4 | 3 | 39.2  | 8.62  | 79  | 4 |
| AOA024R3W7 | Eukaryotic   | 19.5555556   | 4 | 5 | 4 | 24.7  | 4.67  | 95  | 4 |
| AOA0S2Z5M1 | SEC63-like   | 6.57894737   | 4 | 4 | 4 | 87.9  | 5.31  | 62  | 4 |
| AOMZ66     | Shootin-1    | (5.22979398  | 3 | 3 | 3 | 71.6  | 5.33  | 89  | 3 |
| P08579     | U2 small nt  | 16.4444444   | 4 | 4 | 3 | 25.5  | 9.72  | 100 | 4 |
| Q6RFH5     | WD repeat-   | 12.7272727   | 4 | 4 | 4 | 42.4  | 8.32  | 92  | 4 |
| Q9BPX3     | Condensin    | (4.92610837  | 4 | 4 | 4 | 114.3 | 5.59  | 71  | 4 |
| B2R774     | cDNA, FLJ9   | 4.50980392   | 2 | 3 | 2 | 57.5  | 6.77  | 84  | 2 |
| P51572     | B-cell rec   | 19.5121951   | 4 | 4 | 4 | 28    | 8.44  | 86  | 4 |
| AOA0S2Z3Y1 | Lectin gal   | 8.71794872   | 4 | 4 | 4 | 65.3  | 5.27  | 47  | 4 |
| A8K410     | cDNA FLJ78   | 6.65322581   | 3 | 3 | 3 | 54.6  | 5.08  | 115 | 3 |
| 075475     | PC4 and SFF  | 6.41509434   | 4 | 4 | 4 | 60.1  | 9.13  | 82  | 4 |
| Q6PJJ2     | RRP1 protei  | 8.36909871   | 4 | 4 | 4 | 53.4  | 9.48  | 90  | 4 |
| Q9NX24     | H/ACA ribor  | 31.372549    | 3 | 3 | 3 | 17.2  | 8.22  | 63  | 3 |
| AOA024RAD5 | Dolichyl-di  | 11.4035088   | 5 | 5 | 5 | 50.7  | 6.4   | 103 | 5 |
| Q8WUA2     | Peptidyl-p   | 7.92682927   | 3 | 3 | 3 | 57.2  | 5.92  | 60  | 3 |
| Q9NQ29     | Putative R   | 12.1293801   | 4 | 4 | 1 | 43.7  | 9.92  | 86  | 4 |
| Q12907     | Vesicular i  | 8.98876404   | 3 | 4 | 3 | 40.2  | 6.95  | 68  | 3 |
| Q14318     | Peptidyl-p   | 11.1650485   | 3 | 3 | 3 | 44.5  | 4.84  | 96  | 3 |
| Q9NR45     | Sialic acic  | 12.2562674   | 3 | 3 | 3 | 40.3  | 6.74  | 65  | 3 |
| Q16222     | UDP-N-acety  | 9.1954023    | 4 | 4 | 4 | 58.7  | 6.33  | 79  | 4 |
| 000151     | PDZ and LIM  | 11.550152    | 3 | 4 | 3 | 36    | 7.02  | 64  | 3 |
| P35270     | Sepiapterir  | 16.8582375   | 4 | 4 | 4 | 28    | 8.05  | 72  | 4 |
| Q96N66     | Lysophosph   | 8.68644068   | 3 | 4 | 3 | 52.7  | 8.97  | 111 | 3 |
| P13995     | Bifunction   | 14.5714286   | 4 | 4 | 4 | 37.9  | 8.73  | 80  | 4 |
| P63218     | Guanine nuc  | 38.2352941   | 3 | 3 | 3 | 7.3   | 9.85  | 104 | 3 |

|            |                       |              |   |   |   |       |       |     |   |
|------------|-----------------------|--------------|---|---|---|-------|-------|-----|---|
| 000193     | Small acid            | 21.3114754   | 2 | 2 | 2 | 20.3  | 4.72  | 90  | 2 |
| 000186     | Syntaxin-bi           | 6.58783784   | 4 | 4 | 4 | 67.7  | 7.8   | 89  | 4 |
| B2RE46     | cDNA, FLJ9            | 6.60697306   | 4 | 4 | 4 | 69.3  | 5.78  | 87  | 4 |
| Q5QJE6     | Deoxynucle            | 6.48148148   | 3 | 3 | 3 | 84.4  | 6.16  | 82  | 3 |
| P13645     | Keratin, ty           | 5.99315068   | 4 | 4 | 2 | 58.8  | 5.21  | 78  | 4 |
| P40938     | Replicatio            | 9.5505618    | 3 | 3 | 3 | 40.5  | 8.34  | 95  | 3 |
| G3V3A4     | SNW domain            | 7.70577933   | 4 | 4 | 4 | 65.4  | 9.67  | 64  | 4 |
| B2R7B5     | cDNA, FLJ9            | 6.5778781    | 3 | 4 | 3 | 48.2  | 8.66  | 99  | 3 |
| AOA024QZY1 | JTV1 gene,            | 13.125       | 4 | 4 | 4 | 35.3  | 8.22  | 62  | 4 |
| Q3LXA3     | Triokinase,           | 8.34782609   | 4 | 4 | 4 | 58.9  | 7.49  | 76  | 4 |
| Q14696     | LDLR chape            | 8.97435897   | 2 | 4 | 2 | 26.1  | 7.78  | 41  | 2 |
| AOA1BOGW77 | Alpha-amin            | 8.84476534   | 4 | 4 | 4 | 60    | 8.18  | 56  | 4 |
| Q15738     | Sterol-4- $\alpha$    | 10.9919571   | 4 | 5 | 4 | 41.9  | 8.06  | 81  | 4 |
| AOA023T787 | RNA-binding           | 20.6896552   | 3 | 3 | 3 | 19.9  | 5.72  | 72  | 3 |
| V9HW00     | Epididymis            | 12.1301775   | 4 | 4 | 4 | 39    | 9.57  | 67  | 4 |
| Q6U8A4     | Ubiquitin- $\epsilon$ | 3.68705036   | 4 | 5 | 4 | 128.9 | 5.78  | 97  | 4 |
| AOA140VJH9 | Dynein, li            | 21.875       | 2 | 2 | 2 | 10.8  | 7.5   | 105 | 2 |
| Q549M8     | CLE7 OS=Hon           | 18.0327869   | 5 | 5 | 5 | 28.1  | 6.65  | 78  | 5 |
| AOA0C4DFR6 | Protein SE            | 15.0769231   | 3 | 3 | 3 | 35.8  | 5.59  | 72  | 3 |
| AOA024RA52 | Proteasome            | 15.3846154   | 3 | 4 | 3 | 25.9  | 7.43  | 56  | 3 |
| Q13242     | Serine/argi           | 20.361991    | 4 | 4 | 4 | 25.5  | 8.65  | 66  | 4 |
| P62877     | E3 ubiquiti           | 17.5925926   | 2 | 2 | 2 | 12.3  | 6.96  | 57  | 2 |
| Q12996     | Cleavage st           | 4.46304045   | 3 | 3 | 3 | 82.9  | 8.12  | 107 | 3 |
| Q13867     | Bleomycin b           | 12.0879121   | 4 | 5 | 4 | 52.5  | 6.27  | 26  | 4 |
| Q9BRP8     | Partner of            | 25           | 4 | 4 | 4 | 22.6  | 9.45  | 39  | 4 |
| AOA0AOMT49 | Transcript            | 2.55800119   | 4 | 4 | 4 | 188.7 | 8.12  | 78  | 4 |
| Q5ST80     | FLOT1 prote           | 12.8805621   | 4 | 4 | 4 | 47.3  | 7.49  | 40  | 4 |
| Q9UNF1     | Melanoma-a            | 9.5709571    | 3 | 3 | 3 | 64.9  | 9.32  | 65  | 3 |
| B3KMV5     | cDNA FLJ1             | 273.71376812 | 4 | 4 | 4 | 122.8 | 5.85  | 44  | 4 |
| AOA024R8D4 | Mitochondri           | 9.09090909   | 3 | 3 | 3 | 35.5  | 8.94  | 74  | 3 |
| A8K517     | Ribosomal r           | 23.7762238   | 4 | 7 | 4 | 15.8  | 10.49 | 36  | 4 |
| AOA0C4DFL7 | Lanosterol            | 4.7151277    | 2 | 2 | 2 | 57.2  | 8.53  | 68  | 2 |
| AOA024RDF6 | Heterogene            | 8.0952381    | 3 | 6 | 2 | 46.4  | 9.57  | 186 | 3 |
| P04181     | Ornithine $\epsilon$  | 12.0728929   | 4 | 4 | 4 | 48.5  | 7.03  | 53  | 4 |
| O75844     | CAAX preny            | 16.31578947  | 3 | 3 | 3 | 54.8  | 7.49  | 88  | 3 |
| E7ESC6     | Exportin-7            | 3.30882353   | 3 | 3 | 3 | 124   | 6.48  | 61  | 3 |
| P35268     | 60S riboso            | 18.75        | 2 | 4 | 2 | 14.8  | 9.19  | 184 | 2 |
| Q8WXX5     | DnaJ homol            | 13.0769231   | 3 | 4 | 3 | 29.9  | 5.73  | 63  | 3 |
| Q9BRJ6     | Uncharacter           | 22.1649485   | 2 | 2 | 2 | 22.1  | 9.64  | 42  | 2 |
| AOA024R7M0 | Transmembr            | 8.5106383    | 2 | 2 | 2 | 27.3  | 8.02  | 68  | 2 |
| Q15631     | Translin O            | 10.9649123   | 2 | 3 | 2 | 26.2  | 6.44  | 78  | 2 |
| B5ME97     | Septin 10,            | 5.88235294   | 3 | 3 | 3 | 62.9  | 6.83  | 70  | 3 |
| B4DR61     | Protein tra           | 8.29875519   | 4 | 4 | 4 | 52.9  | 8.24  | 115 | 4 |
| B3KY60     | cDNA FLJ1             | 676.10972569 | 5 | 5 | 5 | 92.2  | 8.18  | 78  | 5 |
| Q15833     | Syntaxin-bi           | 7.08263069   | 3 | 3 | 3 | 66.4  | 6.55  | 79  | 3 |
| Q5VZU9     | Tripeptidy            | 13.72424723  | 4 | 4 | 4 | 139.7 | 6.52  | 44  | 4 |
| Q9UK59     | Lariat debu           | 3.86029412   | 2 | 2 | 2 | 61.5  | 5.47  | 73  | 2 |
| AOA140VJI4 | Testicular            | 18.0327869   | 2 | 3 | 2 | 13.3  | 8.35  | 62  | 2 |
| Q9UJX3     | Anaphase-p            | 3.50584307   | 2 | 3 | 2 | 66.8  | 5.64  | 90  | 2 |
| Q13620     | Cullin-4B             | (3.17634173  | 3 | 3 | 1 | 103.9 | 7.37  | 84  | 3 |
| AOA1POAYU5 | Sideroflexi           | 16           | 4 | 4 | 4 | 36    | 9.09  | 61  | 4 |
| B3KNS8     | cDNA FLJ30            | 11.634349    | 3 | 3 | 3 | 41.5  | 10.59 | 36  | 3 |
| Q9UBQ5     | Eukaryotic            | 17.8899083   | 3 | 3 | 3 | 25    | 4.93  | 0   | 3 |
| V9HWC9     | Superoxide            | 16.8831169   | 2 | 3 | 2 | 15.9  | 6.13  | 98  | 2 |
| Q5JRX3     | Presequenc            | 4.43587271   | 4 | 4 | 4 | 117.3 | 6.92  | 76  | 4 |
| Q9Y237     | Peptidyl-p            | 10.6870229   | 2 | 2 | 2 | 13.8  | 9.77  | 71  | 2 |
| AOA140VJP2 | Testicular            | 13.1736527   | 4 | 4 | 4 | 37.5  | 7.36  | 72  | 4 |
| AOA1C7CYX9 | Dihydropyr            | 8.2717873    | 4 | 5 | 4 | 73.5  | 6.35  | 66  | 4 |
| Q9P2B2     | Prostaglan            | 4.20932878   | 3 | 3 | 3 | 98.5  | 6.61  | 82  | 3 |
| Q9UPN9     | E3 ubiquiti           | 3.19432121   | 3 | 3 | 3 | 122.5 | 6.67  | 117 | 3 |
| H9ZYJ1     | Negative el           | 8.15789474   | 2 | 2 | 2 | 43.2  | 9.17  | 115 | 2 |
| Q9UBI6     | Guanine nuc           | 34.7222222   | 2 | 2 | 2 | 8     | 8.97  | 70  | 2 |
| F8WCF6     | Actin-relat           | 19.8895028   | 4 | 5 | 4 | 21    | 8.76  | 96  | 4 |
| U3KQ56     | Glyoxylate            | 14.8044693   | 4 | 4 | 4 | 38.7  | 8.02  | 73  | 4 |
| F8WF69     | Clathrin li           | 10.3846154   | 4 | 4 | 4 | 27.8  | 4.91  | 95  | 4 |
| Q59EK3     | Adaptor-rel           | 18.79828326  | 4 | 4 | 4 | 53.2  | 8.88  | 44  | 4 |
| Q9HOS4     | Probable A            | 17.47252747  | 3 | 3 | 3 | 50.6  | 9.1   | 59  | 3 |
| Q9HA77     | Probable cy           | 7.44680851   | 3 | 3 | 3 | 62.2  | 8.34  | 55  | 3 |
| P61011     | Signal rec            | 5.95238095   | 3 | 3 | 3 | 55.7  | 8.75  | 69  | 3 |
| B2R823     | cDNA, FLJ9            | 11.9047619   | 2 | 2 | 2 | 27.9  | 9.73  | 78  | 2 |
| P50897     | Palmitoyl-\gamma      | 9.1503268    | 2 | 3 | 2 | 34.2  | 6.52  | 51  | 2 |
| Q15257     | Serine/thre           | 15.9217877   | 4 | 4 | 4 | 40.6  | 5.94  | 58  | 4 |
| V9HWJ1     | Glutathione           | 8.86075949   | 4 | 5 | 4 | 52.4  | 5.92  | 93  | 4 |

|            |              |              |   |   |   |       |       |     |   |
|------------|--------------|--------------|---|---|---|-------|-------|-----|---|
| Q9NT62     | Ubiquitin-l  | 7.6433121    | 2 | 2 | 2 | 35.8  | 4.74  | 92  | 2 |
| Q9BQ69     | O-acetyl-Al  | 6.46153846   | 2 | 2 | 2 | 35.5  | 9.51  | 82  | 2 |
| AOA024R539 | Uncharacteri | 13.1410256   | 2 | 2 | 2 | 35.1  | 5.35  | 54  | 2 |
| Q5HYL6     | Putative ur  | 8.80681818   | 3 | 3 | 3 | 39.5  | 5.19  | 104 | 3 |
| O95834     | Echinoderm   | 6.47149461   | 4 | 4 | 4 | 70.6  | 6.32  | 44  | 4 |
| B2RB52     | cDNA, FLJ9   | 4.47427293   | 2 | 2 | 2 | 49.8  | 9.44  | 84  | 2 |
| MOR2C6     | Uncharacteri | 6.97278912   | 3 | 4 | 3 | 65.7  | 6.54  | 49  | 3 |
| Q6IBS0     | Twinfilin-1  | 12.3209169   | 3 | 3 | 3 | 39.5  | 6.84  | 49  | 3 |
| B2RBB2     | cDNA, FLJ9   | 2.52252252   | 1 | 1 | 1 | 61.6  | 6.49  | 77  | 1 |
| Q15003     | Condensin c  | 4.4534413    | 3 | 3 | 3 | 82.5  | 5.06  | 74  | 3 |
| Q9Y3B9     | RRP15-like   | 15.248227    | 4 | 4 | 4 | 31.5  | 5.52  | 61  | 4 |
| Q6FIC5     | Chloride ir  | 15.0197628   | 3 | 3 | 3 | 28.8  | 5.59  | 96  | 3 |
| Q9NRF8     | CTP synthas  | 4.2662116    | 2 | 3 | 1 | 65.6  | 6.9   | 56  | 2 |
| Q9NY93     | Probable A1  | 6.58135283   | 4 | 4 | 4 | 61.6  | 9.26  | 70  | 4 |
| Q92804     | TATA-bindir  | 6.92567568   | 3 | 4 | 1 | 61.8  | 8.02  | 99  | 3 |
| Q9UBB4     | Ataxin-10    | (6.10526316  | 2 | 2 | 2 | 53.5  | 5.25  | 104 | 2 |
| O95861     | 3' (2'), 5'  | -19.09090909 | 3 | 3 | 3 | 33.4  | 5.69  | 60  | 3 |
| P27338     | Amine oxid   | 4.42307692   | 2 | 2 | 2 | 58.7  | 7.5   | 84  | 2 |
| Q96IX5     | Up-regulate  | 27.5862069   | 2 | 3 | 2 | 6.5   | 9.76  | 84  | 2 |
| P49773     | Histidine    | 124.6031746  | 3 | 4 | 3 | 13.8  | 6.95  | 93  | 3 |
| Q8NDC0     | MAPK-inter   | 6.93877551   | 1 | 1 | 1 | 24.3  | 5.62  | 95  | 1 |
| E9PI68     | Signal pept  | 11.2840467   | 3 | 3 | 3 | 28.5  | 8.79  | 71  | 3 |
| HOYAS6     | Polyadenyl   | 14.2011834   | 3 | 3 | 1 | 17.9  | 9.19  | 83  | 3 |
| Q5T9B7     | Adenylate    | 127.1428571  | 5 | 5 | 5 | 23.4  | 8.6   | 59  | 5 |
| BOQYN7     | SUMO-conju   | 19.5652174   | 3 | 4 | 3 | 20.4  | 8.46  | 108 | 3 |
| P32320     | Cytidine de  | 18.4931507   | 2 | 3 | 2 | 16.2  | 6.92  | 64  | 2 |
| Q9Y5L4     | Mitochondri  | 44.2105263   | 3 | 3 | 3 | 10.5  | 8.18  | 46  | 3 |
| P45973     | Chromobox    | 16.7539267   | 3 | 4 | 3 | 22.2  | 5.86  | 58  | 3 |
| AOA024RDE5 | Ras-GTPase   | 7.67634855   | 4 | 4 | 2 | 54.1  | 5.55  | 51  | 4 |
| B4DU42     | cDNA FLJ5    | 618.56697819 | 4 | 4 | 4 | 71.8  | 7.3   | 33  | 4 |
| DOEKE5     | Peptidylpr   | 11.8694362   | 3 | 3 | 3 | 38.5  | 6.84  | 55  | 3 |
| Q9GZL7     | Ribosome bi  | 10.8747045   | 3 | 3 | 3 | 47.7  | 5.9   | 37  | 3 |
| O15347     | High mobili  | 11           | 2 | 2 | 2 | 23    | 8.37  | 82  | 2 |
| B2R602     | cDNA, FLJ9   | 7.01754386   | 3 | 3 | 3 | 45.3  | 7.9   | 95  | 3 |
| Q9H773     | dCTP pyrop   | 15.2941176   | 2 | 2 | 2 | 18.7  | 5.03  | 79  | 2 |
| Q9BS26     | Endoplasmic  | 9.11330049   | 3 | 3 | 3 | 46.9  | 5.26  | 60  | 3 |
| MOQXF9     | Branched-cl  | 3.59550562   | 1 | 2 | 1 | 49.9  | 7.46  | 44  | 1 |
| B2R4D5     | Actin-relat  | 12.3595506   | 2 | 4 | 2 | 20.5  | 8.59  | 71  | 2 |
| X6RAL5     | Histone de   | 11.627907    | 2 | 3 | 2 | 19.5  | 9.8   | 76  | 2 |
| Q55QH4     | DBP2 prote   | 5.47550432   | 5 | 5 | 4 | 119.2 | 6.8   | 23  | 5 |
| P23786     | Carnitine    | (4.7112462   | 3 | 3 | 3 | 73.7  | 8.18  | 76  | 3 |
| P57088     | Transmembr   | 15.7894737   | 4 | 4 | 4 | 28    | 9.7   | 60  | 4 |
| P54709     | Sodium/pot   | 12.9032258   | 3 | 4 | 3 | 31.5  | 8.35  | 65  | 3 |
| Q59EL2     | COP9 const   | 11.751663    | 5 | 5 | 5 | 52.5  | 5.54  | 67  | 5 |
| A8K2T7     | Receptor pi  | 4.21487603   | 4 | 4 | 4 | 134.1 | 6.7   | 55  | 4 |
| Q96PZ0     | Pseudourid   | 6.20272315   | 4 | 4 | 4 | 75    | 6.37  | 65  | 4 |
| P06132     | Uroporphyr   | 10.8991826   | 3 | 3 | 3 | 40.8  | 6.14  | 20  | 3 |
| A8K3Z5     | Nucleoporin  | 11.9631902   | 3 | 3 | 3 | 34.8  | 9.36  | 74  | 3 |
| Q96RS6     | NudC domai   | 3.60205832   | 2 | 2 | 2 | 66.7  | 5.11  | 74  | 2 |
| O95295     | SNARE-ass    | 34.5588235   | 3 | 3 | 3 | 14.9  | 9.31  | 66  | 3 |
| A1L3A7     | Nuclear fr   | 4.74820144   | 3 | 3 | 3 | 76.1  | 8.7   | 75  | 3 |
| Q6NVY1     | 3-hydroxy    | 8.5492228    | 3 | 3 | 3 | 43.5  | 8.19  | 67  | 3 |
| Q9H3N1     | Thioredoxin  | 14.6428571   | 4 | 4 | 4 | 31.8  | 4.98  | 76  | 4 |
| Q14376     | UDP-glucos   | 11.7816092   | 3 | 4 | 3 | 38.3  | 6.73  | 66  | 3 |
| AOA0A0MSW4 | Phosphatid   | 15.498155    | 4 | 4 | 4 | 31.6  | 6.87  | 59  | 4 |
| AOA1L7NY41 | Polyptide    | 8.81355932   | 4 | 4 | 4 | 66.4  | 8.25  | 49  | 4 |
| Q92896     | Golgi appar  | 3.30788804   | 3 | 3 | 3 | 134.5 | 6.9   | 74  | 3 |
| O60701     | UDP-glucos   | 6.88259109   | 3 | 3 | 3 | 55    | 7.12  | 88  | 3 |
| Q8NF37     | Lysophosph   | 6.55430712   | 4 | 4 | 4 | 59.1  | 6.02  | 67  | 4 |
| Q9Y3U8     | 60S ribos    | 28.5714286   | 3 | 5 | 3 | 12.2  | 11.59 | 120 | 3 |
| Q12846     | Syntaxin-4   | 13.1313131   | 3 | 3 | 3 | 34.2  | 6.28  | 55  | 3 |
| Q68D08     | Putative ur  | 10.1851852   | 2 | 3 | 2 | 36.7  | 6.06  | 54  | 2 |
| E5KLJ7     | Mitochondri  | 4.21263791   | 4 | 4 | 4 | 115.8 | 7.87  | 65  | 4 |
| Q14232     | Translatior  | 9.50819672   | 2 | 3 | 2 | 33.7  | 7.33  | 38  | 2 |
| AOA087WWM0 | Trafficking  | 15.4255319   | 2 | 3 | 2 | 21.2  | 5.06  | 59  | 2 |
| Q9NX58     | Cell growt   | 7.12401055   | 2 | 2 | 2 | 43.6  | 9.54  | 61  | 2 |
| HOYL70     | Transducin   | 4.47570332   | 3 | 3 | 3 | 84.4  | 7.27  | 53  | 3 |
| Q96A26     | Protein FA   | 16.8831169   | 3 | 4 | 3 | 17.3  | 9.77  | 76  | 3 |
| Q99584     | Protein S1   | (23.4693878  | 2 | 3 | 2 | 11.5  | 6.16  | 99  | 2 |
| Q15007     | Pre-mRNA-s   | 8.33333333   | 2 | 2 | 2 | 44.2  | 5.19  | 66  | 2 |
| Q9NQW7     | Xaa-Pro am   | 7.06260032   | 4 | 4 | 4 | 69.9  | 5.67  | 64  | 4 |
| O75131     | Copine-3     | 0:6.51769088 | 4 | 4 | 4 | 60.1  | 5.85  | 50  | 4 |
| O75306     | NADH dehyd   | 6.26349892   | 3 | 3 | 3 | 52.5  | 7.55  | 71  | 3 |

|            |              |             |   |   |   |       |       |     |   |
|------------|--------------|-------------|---|---|---|-------|-------|-----|---|
| V9HWA0     | Aminoacyl-t  | 9.31372549  | 3 | 5 | 3 | 45.9  | 6.18  | 46  | 3 |
| Q5SSJ5     | Heterochron  | 5.78661844  | 3 | 3 | 3 | 61.2  | 9.67  | 69  | 3 |
| X6R8A1     | Carboxypept  | 5.42168675  | 2 | 2 | 2 | 56.2  | 6.61  | 60  | 2 |
| P51970     | NADH dehydr  | 16.2790698  | 3 | 3 | 3 | 20.1  | 7.65  | 49  | 3 |
| Q9H583     | HEAT repeat  | 2.37873134  | 4 | 4 | 4 | 242.2 | 6.54  | 54  | 4 |
| AOA024R8P8 | Ribosomal p  | 32.8571429  | 3 | 5 | 3 | 8.2   | 10.1  | 70  | 3 |
| E7EWR4     | Cleavage sit | 5.19262982  | 3 | 3 | 3 | 62.9  | 6.87  | 92  | 3 |
| Q86WV7     | CCDC43 prot  | 9.25110132  | 2 | 2 | 2 | 25.5  | 4.92  | 89  | 2 |
| Q9NZB2     | Constitutiv  | 4.56171735  | 4 | 4 | 4 | 121.8 | 8.88  | 43  | 4 |
| O95202     | LETM1 and I  | 3.24763194  | 2 | 2 | 2 | 83.3  | 6.7   | 70  | 2 |
| P13674     | Prolyl 4-hy  | 6.17977528  | 3 | 3 | 3 | 61    | 6.01  | 79  | 3 |
| B7Z4C8     | 60S ribosom  | 23.8461538  | 3 | 4 | 3 | 15.1  | 10.37 | 93  | 3 |
| P63313     | Thymosin be  | 63.6363636  | 2 | 2 | 2 | 5     | 5.36  | 63  | 2 |
| Q8N5M9     | Protein jac  | 13.1147541  | 2 | 2 | 2 | 21.1  | 9.73  | 84  | 2 |
| Q01628     | Interferon-  | 12.0300752  | 1 | 1 | 1 | 14.6  | 7.01  | 89  | 1 |
| AOA087XOW7 | Acyl-coenz   | 7.12589074  | 3 | 3 | 3 | 46.3  | 7.02  | 45  | 3 |
| O15460     | Prolyl 4-hy  | 8.41121495  | 4 | 4 | 4 | 60.9  | 5.71  | 64  | 4 |
| Q86UA3     | Chromosome   | 6.91489362  | 2 | 2 | 2 | 42.5  | 6.84  | 63  | 2 |
| P43686     | 26S proteas  | 11.9617225  | 5 | 5 | 5 | 47.3  | 5.21  | 70  | 5 |
| Q13144     | Translatior  | 4.71567268  | 3 | 3 | 3 | 80.3  | 5.08  | 69  | 3 |
| Q13564     | NEDD8-activ  | 4.49438202  | 2 | 2 | 2 | 60.2  | 5.4   | 104 | 2 |
| P52298     | Nuclear cap  | 12.1794872  | 2 | 2 | 2 | 18    | 8.21  | 88  | 2 |
| Q1HBJ4     | Mitogen-act  | 10.2777778  | 3 | 3 | 2 | 41.4  | 6.98  | 75  | 3 |
| P61964     | WD repeat-c  | 12.5748503  | 3 | 3 | 3 | 36.6  | 8.27  | 46  | 3 |
| H3BNX8     | Cytochrome   | 20.2614379  | 4 | 4 | 3 | 17.2  | 6     | 79  | 4 |
| Q14320     | Protein FAM  | 8.55457227  | 2 | 2 | 2 | 40.2  | 6.83  | 52  | 2 |
| Q9NQ39     | Putative C   | 13.0681818  | 2 | 2 | 2 | 20.1  | 10.13 | 64  | 2 |
| O75116     | Rho-associ   | 4.10662824  | 5 | 5 | 5 | 160.8 | 6.02  | 43  | 5 |
| Q01085     | Nucleolysin  | 5.06666667  | 2 | 2 | 2 | 41.6  | 7.74  | 76  | 2 |
| Q96HY6     | DDRKG domai  | 10.1910828  | 2 | 2 | 2 | 35.6  | 5.12  | 47  | 2 |
| Q9UHG3     | Prenylcyste  | 8.11881188  | 4 | 4 | 4 | 56.6  | 6.18  | 51  | 4 |
| P53597     | Succinate--  | 10.6936416  | 3 | 3 | 3 | 36.2  | 8.79  | 60  | 3 |
| AOA024R2K4 | Leucine ric  | 3.36927224  | 2 | 2 | 1 | 84.1  | 6.98  | 81  | 2 |
| O43681     | ATPase ASN   | 9.48275862  | 4 | 5 | 4 | 38.8  | 4.91  | 55  | 4 |
| B2RDQ3     | cDNA, FLJ9   | 9.02777778  | 3 | 4 | 3 | 33.7  | 11.25 | 54  | 3 |
| P30049     | ATP synthas  | 8.33333333  | 1 | 1 | 1 | 17.5  | 5.49  | 69  | 1 |
| Q15369     | Elongin-C    | (23.2142857 | 2 | 2 | 2 | 12.5  | 4.78  | 77  | 2 |
| Q14527     | Helicase-li  | 4.36075322  | 4 | 4 | 4 | 113.9 | 8.6   | 34  | 4 |
| P49790     | Nuclear poi  | 2.84745763  | 3 | 3 | 3 | 153.8 | 8.73  | 62  | 3 |
| Q5TDG3     | WD repeat c  | 2.96924708  | 3 | 3 | 3 | 106   | 6.64  | 100 | 3 |
| Q9NUP9     | Protein lir  | 18.7817259  | 3 | 3 | 3 | 21.8  | 8.43  | 55  | 3 |
| Q15182     | Small nucl   | 10.5263158  | 3 | 4 | 3 | 29.7  | 10.07 | 86  | 3 |
| P18077     | 60S ribosom  | 15.4545455  | 3 | 4 | 3 | 12.5  | 11.06 | 98  | 3 |
| AOA024R2W3 | Protein kir  | 4.95049505  | 2 | 2 | 2 | 45.5  | 5.07  | 81  | 2 |
| Q9UJZ1     | Stomatin-li  | 4.8876404   | 4 | 4 | 4 | 38.5  | 7.39  | 62  | 4 |
| AOA024R880 | Cyclin-depe  | 5.64516129  | 2 | 2 | 2 | 42.8  | 8.79  | 75  | 2 |
| BOLPF3     | Growth fact  | 15.2073733  | 3 | 3 | 3 | 25.2  | 6.32  | 56  | 3 |
| Q9NP79     | Vacuolar pi  | 13.3550489  | 4 | 5 | 4 | 33.9  | 6.29  | 55  | 4 |
| J3KR97     | Tubulin-spe  | 2.76422764  | 2 | 2 | 2 | 136.5 | 6.34  | 63  | 2 |
| F8VX04     | Sodium-cou   | 5.5666004   | 3 | 3 | 3 | 56.2  | 7.69  | 60  | 3 |
| Q6FH36     | Peptidyl-pi  | 18.079096   | 3 | 3 | 3 | 19.2  | 8.07  | 74  | 3 |
| P51648     | Fatty aldeh  | 4.94845361  | 2 | 2 | 2 | 54.8  | 7.88  | 76  | 2 |
| O95394     | Phosphoacet  | 4.05904059  | 2 | 3 | 2 | 59.8  | 6.25  | 62  | 2 |
| D3DWY7     | von Hippel-  | 13.304721   | 3 | 3 | 3 | 26.5  | 9.01  | 72  | 3 |
| Q8NAV1     | Pre-mRNA-s   | 7.76923077  | 2 | 2 | 2 | 37.5  | 9.96  | 94  | 2 |
| P17676     | CCAAT/enhar  | 8.98550725  | 2 | 3 | 2 | 36.1  | 8.31  | 62  | 2 |
| Q96GK7     | Fumarylacet  | 11.4649682  | 3 | 4 | 3 | 34.6  | 8.24  | 40  | 3 |
| A5Y5A3     | PC1/MRPS28   | 12.2302158  | 3 | 3 | 3 | 31.2  | 6.19  | 75  | 3 |
| AOA0S2Z3D0 | Carbonic ar  | 6.53594771  | 2 | 3 | 2 | 49.7  | 4.72  | 107 | 2 |
| Q14690     | Protein RRF  | 2.29823624  | 4 | 4 | 4 | 208.6 | 8.87  | 30  | 4 |
| P52948     | Nuclear poi  | 2.31150248  | 4 | 4 | 4 | 197.5 | 6.4   | 67  | 4 |
| P42766     | 60S ribosom  | 15.4471545  | 2 | 5 | 2 | 14.5  | 11.05 | 90  | 2 |
| P10606     | Cytochrome   | 18.6046512  | 2 | 3 | 2 | 13.7  | 8.81  | 78  | 2 |
| P09669     | Cytochrome   | 24          | 3 | 4 | 3 | 8.8   | 10.39 | 59  | 3 |
| P42126     | Enoyl-CoA c  | 8.2781457   | 2 | 2 | 2 | 32.8  | 8.54  | 62  | 2 |
| P56385     | ATP synthas  | 24.6376812  | 2 | 3 | 2 | 7.9   | 9.35  | 94  | 2 |
| Q9UHV9     | Prefoldin s  | 16.2337662  | 2 | 2 | 2 | 16.6  | 6.58  | 81  | 2 |
| P41214     | Eukaryotic   | 7.3630137   | 3 | 3 | 3 | 64.7  | 7.65  | 54  | 3 |
| P14174     | Macrophage   | 17.3913043  | 2 | 2 | 2 | 12.5  | 7.88  | 85  | 2 |
| Q96AY3     | Peptidyl-pi  | 7.04467354  | 3 | 3 | 3 | 64.2  | 5.62  | 58  | 3 |
| Q969N2     | GPI transan  | 5.3633218   | 3 | 3 | 3 | 65.7  | 8.38  | 82  | 3 |
| K7ELP0     | Tropomyosin  | 28.9855072  | 2 | 3 | 1 | 8     | 5.01  | 60  | 2 |
| Q32MZ4     | Leucine-ric  | 4.57920792  | 3 | 3 | 2 | 89.2  | 4.65  | 52  | 3 |



|            |             |             |   |   |   |       |       |     |   |
|------------|-------------|-------------|---|---|---|-------|-------|-----|---|
| Q5SQP8     | C-terminal- | 8.9668616   | 4 | 4 | 4 | 56.1  | 6.96  | 48  | 4 |
| K7ELG9     | Protein LS  | 3.91304348  | 1 | 2 | 1 | 24.9  | 7.42  | 75  | 1 |
| Q6FGU2     | DTYMK prote | 12.2641509  | 3 | 4 | 3 | 23.8  | 8.27  | 46  | 3 |
| K7ELC2     | 40S ribosom | 7.89473684  | 1 | 3 | 1 | 17.7  | 10.39 | 97  | 1 |
| E7EUC7     | UTP--glucos | 8.7040619   | 4 | 5 | 1 | 57.8  | 8.13  | 66  | 4 |
| E9PLN8     | Uncharacter | 7.8313253   | 1 | 1 | 1 | 17.9  | 8.62  | 70  | 1 |
| Q13895     | Bystin OS=  | 16.63615561 | 2 | 3 | 2 | 49.6  | 8.12  | 32  | 2 |
| P54920     | Alpha-solut | 7.45762712  | 2 | 3 | 2 | 33.2  | 5.36  | 87  | 2 |
| Q9BW60     | Elongation  | 9.31899642  | 2 | 2 | 2 | 32.6  | 9.6   | 62  | 2 |
| Q4VC31     | Coiled-coil | 19.4444444  | 2 | 3 | 2 | 16.6  | 7.81  | 26  | 2 |
| Q13596     | Sorting ne  | 7.85440613  | 3 | 3 | 3 | 59    | 5.15  | 60  | 3 |
| B4DPZ4     | cDNA FLJ60  | 7.20524017  | 3 | 3 | 3 | 52.7  | 6.7   | 44  | 3 |
| Q16698     | 2,4-dienoy  | 18.65671642 | 3 | 3 | 3 | 36    | 9.28  | 65  | 3 |
| Q9Y2S7     | Polymerase  | 6.52173913  | 2 | 2 | 2 | 42    | 8.63  | 64  | 2 |
| Q6ICQ8     | ARHG protei | 22.513089   | 3 | 3 | 2 | 21.3  | 8.12  | 53  | 3 |
| O95758     | Polypyrimic | 6.15942029  | 3 | 3 | 1 | 59.7  | 9.04  | 80  | 3 |
| P09543     | 2',3'-cycli | 8.31353919  | 4 | 4 | 4 | 47.5  | 9.07  | 18  | 4 |
| P06703     | Protein S1  | (27.7777778 | 4 | 5 | 4 | 10.2  | 5.48  | 94  | 4 |
| P31937     | 3-hydroxy   | 8.63095238  | 2 | 2 | 2 | 35.3  | 8.13  | 62  | 2 |
| B7ZKQ8     | PODXL prote | 5.17857143  | 3 | 3 | 3 | 58.8  | 5.49  | 79  | 3 |
| B2RBS8     | cDNA, FLJ9  | 3.44827586  | 2 | 2 | 2 | 69.3  | 6.28  | 96  | 2 |
| O96008     | Mitochondri | 9.41828255  | 3 | 3 | 3 | 37.9  | 7.25  | 51  | 3 |
| Q9UG63     | ATP-binding | 3.53130016  | 2 | 2 | 2 | 71.2  | 7.37  | 77  | 2 |
| P10620     | Microsomal  | 19.3548387  | 2 | 3 | 2 | 17.6  | 9.39  | 57  | 2 |
| AOA024R8Z9 | Aspartyl-tf | 4.65116279  | 3 | 3 | 3 | 73.5  | 8.02  | 58  | 3 |
| Q8NBJ4     | Golgi membr | 10.4738155  | 4 | 4 | 4 | 45.3  | 4.97  | 61  | 4 |
| I1SRC5     | UBE2L3/KRA  | 13.8513514  | 3 | 3 | 2 | 34    | 8.1   | 51  | 3 |
| Q03701     | CCAAT/enhar | 2.65654649  | 3 | 3 | 3 | 120.9 | 5.94  | 60  | 3 |
| A6NDG6     | Glycerol-3- | 9.65732087  | 3 | 3 | 3 | 34    | 6.14  | 80  | 3 |
| Q9Y3B2     | Exosome con | 13.8461538  | 2 | 2 | 2 | 21.4  | 8.24  | 49  | 2 |
| B2RDP6     | cDNA, FLJ9  | 6.52017937  | 3 | 3 | 3 | 49.4  | 4.92  | 39  | 3 |
| P18031     | Tyrosine-p  | 5.51724138  | 2 | 2 | 2 | 49.9  | 6.27  | 55  | 2 |
| Q96EY7     | Pentatricor | 4.93468795  | 3 | 3 | 3 | 78.5  | 6.42  | 67  | 3 |
| Q9H845     | Acyl-CoA de | 5.79710145  | 3 | 3 | 3 | 68.7  | 7.96  | 35  | 3 |
| Q9UBS4     | DnaJ homol  | 19.273743   | 4 | 4 | 4 | 40.5  | 6.18  | 38  | 4 |
| Q96SZ5     | 2-aminoeth  | 7.40740741  | 2 | 2 | 2 | 29.7  | 6.04  | 53  | 2 |
| Q13616     | Cullin-1 O  | 3.60824742  | 3 | 3 | 3 | 89.6  | 8     | 81  | 3 |
| D6RBW1     | Eukaryotic  | 7.75510204  | 2 | 2 | 2 | 28.5  | 8.12  | 61  | 2 |
| Q8NB90     | Spermatoger | 3.9193729   | 3 | 4 | 2 | 97.8  | 5.66  | 73  | 3 |
| P07858     | Cathepsin F | 8.55457227  | 3 | 3 | 3 | 37.8  | 6.3   | 63  | 3 |
| P51398     | 28S ribosom | 6.28140704  | 2 | 2 | 2 | 45.5  | 8.88  | 46  | 2 |
| Q10570     | Cleavage ar | 0.97020097  | 1 | 1 | 1 | 160.8 | 6.4   | 76  | 1 |
| AOA0AGYY92 | Adenylosucc | 4.41767068  | 2 | 2 | 2 | 56.2  | 7.43  | 68  | 2 |
| P58546     | Myotrophin  | 25.4237288  | 2 | 2 | 2 | 12.9  | 5.52  | 55  | 2 |
| Q5T1Z8     | Pumilio hon | 4.08496732  | 4 | 4 | 4 | 130   | 6.9   | 39  | 4 |
| Q6MZP3     | Putative ur | 2.44479495  | 3 | 3 | 2 | 145.6 | 5.52  | 60  | 3 |
| B4DPG9     | cDNA FLJ59  | 6.03448276  | 2 | 2 | 2 | 37.5  | 9.89  | 70  | 2 |
| P20839     | Inosine-5'  | -3.89105058 | 2 | 2 | 1 | 55.4  | 6.9   | 79  | 2 |
| Q92466     | DNA damage- | 7.96252927  | 3 | 3 | 3 | 47.8  | 9.47  | 51  | 3 |
| O15357     | Phosphatid  | 2.22575517  | 3 | 3 | 3 | 138.5 | 6.54  | 55  | 3 |
| P37235     | Hippocalcir | 15.5440415  | 3 | 3 | 3 | 22.3  | 5.35  | 71  | 3 |
| Q9NZ01     | Very-long-  | 9.74025974  | 3 | 4 | 3 | 36    | 9.45  | 34  | 3 |
| B2R983     | cDNA, FLJ9  | 14.5228216  | 3 | 4 | 3 | 27.5  | 6.6   | 79  | 3 |
| E5KS60     | Succinate-- | 4.75161987  | 2 | 2 | 2 | 50.3  | 7.42  | 49  | 2 |
| AOA087WT20 | DDB1- and   | ( 4.0201005 | 2 | 2 | 2 | 67.5  | 9.29  | 54  | 2 |
| AOA024R1T1 | Ribosomal   | 1 25        | 2 | 2 | 2 | 15.4  | 10.74 | 52  | 2 |
| Q6IB54     | ATP syntha  | :30.5555556 | 3 | 3 | 3 | 12.6  | 9.52  | 48  | 3 |
| O00159     | Unconventic | 3.38664158  | 3 | 3 | 3 | 121.6 | 9.41  | 56  | 3 |
| G3V0E4     | Mitochondri | 5.91836735  | 3 | 3 | 3 | 54.2  | 6.83  | 60  | 3 |
| AOA024R5J5 | H. sapiens  | 114.9038462 | 3 | 5 | 2 | 23.6  | 5.54  | 135 | 3 |
| AOA087X2I1 | 26S proteas | 4.46650124  | 2 | 2 | 2 | 45.8  | 7.78  | 75  | 2 |
| H3BLV9     | SRSF protei | 6.40834575  | 3 | 4 | 3 | 76    | 6.28  | 45  | 3 |
| AOA024QYX0 | Emopamil bi | 9.56521739  | 2 | 2 | 2 | 26.3  | 7.9   | 52  | 2 |
| E5RJR5     | S-phase kir | 7.36196319  | 1 | 2 | 1 | 18.7  | 4.7   | 59  | 1 |
| P62318     | Small nucle | 23.8095238  | 2 | 2 | 2 | 13.9  | 10.32 | 39  | 2 |
| Q9NXG2     | THUMP domai | 8.21529745  | 2 | 2 | 2 | 39.3  | 7.88  | 67  | 2 |
| Q9NPJ3     | Acyl-coenz  | 15.7142857  | 2 | 2 | 2 | 15    | 9.14  | 87  | 2 |
| V9HW45     | Epididymis  | 6.51340996  | 2 | 2 | 2 | 30    | 7.06  | 75  | 2 |
| AOA140VK83 | Protein ph  | 6.11111111  | 2 | 2 | 2 | 41.5  | 4.91  | 73  | 2 |
| Q86UE4     | Protein LYF | 2.74914089  | 1 | 2 | 1 | 63.8  | 9.32  | 54  | 1 |
| Q9BV57     | 1,2-dihydr  | 15.0837989  | 2 | 3 | 2 | 21.5  | 5.68  | 33  | 2 |
| Q96T51     | RUN and FY  | 5.79096045  | 3 | 3 | 3 | 79.8  | 5.74  | 39  | 3 |
| B2RB47     | AMP deamin  | 3.64050057  | 3 | 4 | 3 | 100.7 | 6.93  | 29  | 3 |

|            |                        |   |   |   |       |       |     |   |
|------------|------------------------|---|---|---|-------|-------|-----|---|
| Q9HCN4     | GPN-loop G14.27807487  | 1 | 1 | 1 | 41.7  | 4.92  | 59  | 1 |
| O60716     | Catenin del4.75206612  | 3 | 3 | 3 | 108.1 | 6.23  | 60  | 3 |
| P62310     | U6 snRNA-as32.3529412  | 2 | 2 | 2 | 11.8  | 4.7   | 39  | 2 |
| P62277     | 40S ribosom 19.205298  | 3 | 5 | 3 | 17.2  | 10.54 | 106 | 3 |
| Q13045     | Protein fli2.52167061  | 3 | 3 | 3 | 144.7 | 6.05  | 68  | 3 |
| AOA0S2Z5U6 | Pyrroline-ε 16.5625    | 4 | 4 | 3 | 33.6  | 7.77  | 46  | 4 |
| Q8NFH3     | Nucleoporin6.31578947  | 2 | 2 | 2 | 42.1  | 5.63  | 79  | 2 |
| Q9UKY7     | Protein CDI30.2325581  | 4 | 4 | 4 | 27.3  | 6.4   | 35  | 4 |
| Q53GB0     | Mitochondri8.45070423  | 1 | 1 | 1 | 15.5  | 4.34  | 69  | 1 |
| Q9H0D6     | 5'-3' exori2.52631579  | 2 | 2 | 2 | 108.5 | 7.47  | 61  | 2 |
| P46108     | Adapter mol 6.25       | 2 | 2 | 2 | 33.8  | 5.55  | 61  | 2 |
| P35573     | Glycogen de 2.154047   | 3 | 3 | 3 | 174.7 | 6.76  | 47  | 3 |
| Q15392     | Delta (24)-α4.26356589 | 2 | 2 | 2 | 60.1  | 8.16  | 68  | 2 |
| P01033     | Metalloprot11.1111111  | 2 | 2 | 2 | 23.2  | 8.1   | 70  | 2 |
| Q8NI27     | THO comple1.75768989   | 3 | 3 | 3 | 182.7 | 8.44  | 49  | 3 |
| AOA024R5F7 | 7-dehydrocl2.73684211  | 1 | 1 | 1 | 54.5  | 8.7   | 71  | 1 |
| Q15006     | ER membrane8.41750842  | 2 | 2 | 2 | 34.8  | 6.57  | 69  | 2 |
| AOA0C4DFU2 | Superoxide 13.963964   | 3 | 3 | 3 | 24.7  | 8.25  | 42  | 3 |
| P49458     | Signal recc34.8837209  | 3 | 3 | 3 | 10.1  | 7.97  | 54  | 3 |
| H7C1E4     | AP-1 comple13.6125654  | 2 | 2 | 2 | 22.2  | 9.16  | 77  | 2 |
| Q6NUQ4     | Transmembr3.48330914   | 2 | 2 | 2 | 77.1  | 9.14  | 72  | 2 |
| Q8TED0     | U3 small nt 5.5984556  | 3 | 3 | 3 | 58.4  | 9.11  | 51  | 3 |
| Q9BY43     | Charged mul10.3603604  | 2 | 2 | 2 | 25.1  | 4.7   | 75  | 2 |
| Q6IPL9     | HMGAI prote13.0841121  | 2 | 4 | 1 | 11.6  | 11.06 | 57  | 2 |
| B2R4R9     | HCG26477 0530.4347826  | 2 | 3 | 2 | 7.8   | 10.7  | 66  | 2 |
| Q09161     | Nuclear cap3.03797468  | 2 | 2 | 2 | 91.8  | 6.43  | 49  | 2 |
| Q14165     | Malectin 0510.6164384  | 2 | 2 | 2 | 32.2  | 5.41  | 56  | 2 |
| Q15758     | Neutral ami7.39371534  | 3 | 3 | 3 | 56.6  | 5.48  | 61  | 3 |
| Q9Y2W2     | WW domain-15.14820593  | 3 | 3 | 3 | 70    | 8.38  | 55  | 3 |
| P56134     | ATP synthas27.6595745  | 2 | 2 | 2 | 10.9  | 9.67  | 63  | 2 |
| AOA0B4J2E5 | Uncharacter3.59085963  | 3 | 3 | 3 | 102.4 | 6.2   | 65  | 3 |
| AOA0A0MR66 | RNA binding3.61809045  | 3 | 3 | 3 | 110.3 | 6.28  | 53  | 3 |
| D6RFF8     | Glucosamin11.0344828   | 3 | 3 | 3 | 32.4  | 6.46  | 52  | 3 |
| AOA087WXU3 | Extended s3.36590662   | 3 | 3 | 3 | 102.3 | 9.26  | 0   | 3 |
| Q13636     | Ras-relatec9.27835052  | 2 | 2 | 2 | 21.6  | 7.06  | 73  | 2 |
| P51114     | Fragile X n4.18679549  | 2 | 2 | 2 | 69.7  | 6.15  | 72  | 2 |
| Q75400     | Pre-mRNA-pi3.34378265  | 3 | 3 | 3 | 108.7 | 7.56  | 49  | 3 |
| Q14530     | Thioredoxin9.73451327  | 2 | 2 | 2 | 26.5  | 5.88  | 73  | 2 |
| Q00765     | Receptor ex11.1111111  | 2 | 2 | 2 | 21.5  | 8.1   | 69  | 2 |
| AOA140VJR2 | Testicular 7.30223124  | 3 | 3 | 3 | 54.5  | 6     | 36  | 3 |
| A4LAA3     | Alpha thal20.88282504  | 2 | 2 | 2 | 282.4 | 6.55  | 73  | 2 |
| P35269     | General tr5.60928433   | 2 | 2 | 2 | 58.2  | 7.49  | 62  | 2 |
| Q8TDJ5     | Tyrosine-pr6.10211706  | 3 | 4 | 3 | 88.6  | 6.33  | 58  | 3 |
| Q16186     | Proteasoma19.09090909  | 3 | 4 | 3 | 42.1  | 5.07  | 53  | 3 |
| HOYEH1     | Phosphatidy12.3376623  | 2 | 2 | 1 | 32.2  | 8.31  | 47  | 2 |
| P19784     | Casein kin11.1428571   | 3 | 3 | 3 | 41.2  | 8.56  | 65  | 3 |
| Q96JP5     | E3 ubiquiti2.10526316  | 1 | 1 | 1 | 63.4  | 7.36  | 66  | 1 |
| B2R8N1     | cDNA, FLJ913.8755981   | 2 | 2 | 2 | 23.2  | 5.38  | 38  | 2 |
| AOA140VJL8 | Testicular 6.54761905  | 2 | 2 | 2 | 36.7  | 7.91  | 86  | 2 |
| B2R791     | cDNA, FLJ914.6852123   | 3 | 3 | 3 | 77.5  | 9.5   | 66  | 3 |
| Q60488     | Long-chain-5.48523207  | 3 | 3 | 2 | 79.1  | 8.38  | 35  | 3 |
| Q86W42     | THO comple7.3313783    | 2 | 2 | 2 | 37.5  | 7.43  | 31  | 2 |
| H3BP20     | Beta-hexos5.37037037   | 3 | 4 | 3 | 62    | 5.21  | 71  | 3 |
| Q86X76     | Nitrilase 17.95107034  | 2 | 2 | 2 | 35.9  | 7.74  | 76  | 2 |
| E7ETB3     | Aspartyl an4.86815416  | 2 | 2 | 2 | 54.5  | 7.74  | 62  | 2 |
| Q9BPW8     | Protein Nip6.69014085  | 2 | 3 | 2 | 33.3  | 9.31  | 58  | 2 |
| Q99471     | Prefoldin ε14.9350649  | 2 | 2 | 2 | 17.3  | 6.33  | 60  | 2 |
| H3BS72     | Very-long-c 6.25       | 2 | 2 | 2 | 47.1  | 8.85  | 36  | 2 |
| Q7Z4W1     | L-xylulose 9.01639344  | 2 | 2 | 2 | 25.9  | 8.1   | 79  | 2 |
| Q06124     | Tyrosine-pi4.52261307  | 2 | 2 | 2 | 68.4  | 7.3   | 71  | 2 |
| P15328     | Folate recc17.1206226  | 3 | 3 | 3 | 29.8  | 7.97  | 37  | 3 |
| Q9BTC8     | Metastasis-5.05050505  | 3 | 3 | 3 | 67.5  | 8.57  | 55  | 3 |
| B3KPC7     | Actin-relat16.3398693  | 2 | 2 | 2 | 17    | 6.02  | 52  | 2 |
| Q9BYG3     | MKI67 FHA c7.84982935  | 2 | 2 | 2 | 34.2  | 9.88  | 72  | 2 |
| Q92520     | Protein FA8.81057269   | 2 | 2 | 2 | 24.7  | 8.29  | 57  | 2 |
| A8K5D4     | Myelin prot5.57620818  | 1 | 1 | 1 | 29.1  | 8.72  | 81  | 1 |
| Q060936    | Nucleolar p17.3076923  | 2 | 2 | 2 | 22.6  | 4.18  | 61  | 2 |
| Q96QD8     | Sodium-coq2.17391304   | 1 | 1 | 1 | 56    | 8     | 72  | 1 |
| Q43719     | HIV Tat-spc3.31125828  | 3 | 3 | 3 | 85.8  | 4.4   | 73  | 3 |
| P17480     | Nucleolar 13.66492147  | 2 | 2 | 2 | 89.4  | 5.81  | 41  | 2 |
| B2R7E8     | cDNA, FLJ916.2962963   | 3 | 4 | 3 | 29.2  | 6.15  | 40  | 3 |
| Q9H936     | Mitochondri9.59752322  | 3 | 3 | 3 | 34.4  | 9.29  | 52  | 3 |
| Q86SX6     | Glutaredoxi8.91719745  | 1 | 1 | 1 | 16.6  | 6.79  | 72  | 1 |

|            |                       |   |   |   |       |       |     |   |
|------------|-----------------------|---|---|---|-------|-------|-----|---|
| D6RER5     | Septin-11 (9.02777778 | 3 | 3 | 1 | 49.8  | 6.68  | 67  | 3 |
| B2RAR3     | Queueine tR3.47394541 | 1 | 1 | 1 | 44    | 7.43  | 59  | 1 |
| F8VXC8     | SWI/SNF con2.08835341 | 2 | 2 | 2 | 136.1 | 5.71  | 57  | 2 |
| Q9H832     | Ubiquitin-c6.21468927 | 3 | 3 | 3 | 38.2  | 5.62  | 85  | 3 |
| P23368     | NAD-depende2.56849315 | 1 | 1 | 1 | 65.4  | 7.61  | 81  | 1 |
| Q96EK6     | Glucosamine5.97826087 | 1 | 1 | 1 | 20.7  | 7.99  | 75  | 1 |
| Q6FIE5     | PHP14 prote 9.6       | 1 | 1 | 1 | 13.8  | 6.07  | 59  | 1 |
| P49821     | NADH dehyd4.31034483  | 2 | 2 | 2 | 50.8  | 8.21  | 67  | 2 |
| Q9BW92     | Threonine--4.17827298 | 3 | 3 | 3 | 81    | 7.3   | 47  | 3 |
| B2R713     | cDNA, FLJ9:5.59345157 | 2 | 2 | 2 | 81.7  | 7.97  | 25  | 2 |
| AOA0S2Z5L1 | ATP-binding4.23131171 | 2 | 2 | 2 | 79.7  | 6.34  | 61  | 2 |
| Q15427     | Splicing fe3.30188679 | 1 | 1 | 1 | 44.4  | 8.56  | 70  | 1 |
| Q9NRV9     | Heme-bindir10.5820106 | 2 | 2 | 2 | 21.1  | 5.8   | 86  | 2 |
| AOA087WZK0 | Deoxyhypusil1.3513514 | 3 | 3 | 3 | 41.1  | 5.47  | 39  | 3 |
| 000764     | Pyridoxal f6.73076923 | 2 | 2 | 2 | 35.1  | 6.13  | 28  | 2 |
| 094776     | Metastasis-4.19161677 | 3 | 3 | 3 | 75    | 9.66  | 61  | 3 |
| Q5BKZ1     | DBIRD compl3.78006873 | 2 | 2 | 2 | 65.6  | 5.15  | 48  | 2 |
| P61009     | Signal pep15.5555556  | 3 | 3 | 3 | 20.3  | 8.62  | 57  | 3 |
| P78406     | mRNA export5.97826087 | 2 | 3 | 2 | 40.9  | 7.83  | 103 | 2 |
| Q99442     | Translocati9.77443609 | 4 | 4 | 4 | 45.8  | 7.12  | 31  | 4 |
| Q7Z5L9     | Interferon 6.47359455 | 3 | 3 | 3 | 61    | 8.69  | 43  | 3 |
| Q8NDH3     | Probable an2.29445507 | 1 | 1 | 1 | 55.8  | 6.87  | 71  | 1 |
| Q9UNS2     | COP9 signal5.20094563 | 2 | 2 | 2 | 47.8  | 6.65  | 53  | 2 |
| D6RFN0     | COP9 signal4.56621005 | 2 | 2 | 2 | 49.7  | 5.81  | 65  | 2 |
| Q01780     | Exosome con3.61581921 | 3 | 4 | 3 | 100.8 | 8.46  | 32  | 3 |
| P28070     | Proteasome 10.2272727 | 3 | 4 | 3 | 29.2  | 5.97  | 91  | 3 |
| AOA0B4J2C3 | Translatior17.2588832 | 3 | 3 | 3 | 22.6  | 5.24  | 60  | 3 |
| Q9H2G2     | STE20-like 1.94331984 | 2 | 3 | 2 | 142.6 | 5.15  | 24  | 2 |
| P41227     | N-alpha-acc9.78723404 | 2 | 2 | 2 | 26.4  | 5.64  | 44  | 2 |
| B4DLM8     | cDNA FLJ5615.49065421 | 3 | 3 | 3 | 95    | 6.58  | 33  | 3 |
| Q8WTT2     | Nucleolar c 4.25      | 3 | 3 | 3 | 92.5  | 9.17  | 40  | 3 |
| B0QZ18     | Copine-1 054.98154982 | 3 | 3 | 3 | 59.7  | 6.04  | 74  | 3 |
| B4DNC0     | cDNA FLJ61112.4087591 | 3 | 3 | 3 | 30.6  | 8.37  | 55  | 3 |
| B7Z2R2     | Cytochrome 13.6645963 | 2 | 2 | 2 | 18.7  | 8.95  | 39  | 2 |
| AOA024RDV9 | Spastic par 1.8018018 | 1 | 1 | 1 | 72.8  | 5.91  | 70  | 1 |
| Q5STK2     | Prefoldin s 15.503876 | 2 | 2 | 2 | 14.6  | 8.88  | 58  | 2 |
| 000483     | Cytochrome 24.691358  | 2 | 2 | 2 | 9.4   | 9.38  | 75  | 2 |
| E7EMK3     | Flotillin-25.38302277 | 2 | 2 | 2 | 53.1  | 5.24  | 53  | 2 |
| P62273     | 40S riboson32.1428571 | 2 | 2 | 2 | 6.7   | 10.13 | 66  | 2 |
| P41223     | Protein BUI7.63888889 | 1 | 1 | 1 | 17    | 8.82  | 54  | 1 |
| E9PR30     | 40S riboson11.2244898 | 2 | 3 | 2 | 10.9  | 11.56 | 89  | 2 |
| Q9H8Y8     | Golgi reas6.19469027  | 2 | 2 | 2 | 47.1  | 4.82  | 52  | 2 |
| B7ZKQ9     | SCARB1 prot6.23700624 | 2 | 3 | 2 | 53.8  | 7.85  | 29  | 2 |
| B2RDJ6     | Probable c2.65486726  | 1 | 2 | 1 | 37.8  | 4.97  | 69  | 1 |
| 075208     | Ubiquinone 6.60377358 | 1 | 1 | 1 | 35.5  | 5.94  | 29  | 1 |
| Q5J7U2     | TGF beta-ir8.84615385 | 2 | 2 | 2 | 30    | 10.27 | 58  | 2 |
| Q86YP4     | Transcripti3.79146919 | 2 | 2 | 1 | 68    | 9.94  | 56  | 2 |
| Q99961     | Endophilin-7.88043478 | 2 | 2 | 2 | 41.5  | 5.43  | 53  | 2 |
| P55081     | Microfibri15.01138952 | 2 | 2 | 2 | 51.9  | 4.98  | 55  | 2 |
| AOA024RD11 | Protein phc3.98671096 | 2 | 2 | 2 | 69.9  | 8.13  | 53  | 2 |
| AOA0C4DGG9 | Chromodomai1.39390811 | 3 | 3 | 3 | 220.3 | 6.02  | 52  | 3 |
| B0S7P4     | cDNA, FLJ9:7.75193798 | 2 | 2 | 2 | 29.4  | 9.38  | 61  | 2 |
| Q9NRF9     | DNA polymer15.6462585 | 2 | 2 | 2 | 16.8  | 4.74  | 48  | 2 |
| Q9NYL4     | Peptidyl-pr5.47263682 | 1 | 2 | 1 | 22.2  | 9.39  | 28  | 1 |
| Q8IVF2     | Protein AHP3.76186368 | 4 | 4 | 4 | 616.2 | 5.36  | 34  | 4 |
| Q9BU61     | NADH dehyd13.5869565  | 2 | 2 | 2 | 20.3  | 8.22  | 55  | 2 |
| P11279     | Lysosome-a:4.79616307 | 2 | 3 | 2 | 44.9  | 8.75  | 75  | 2 |
| Q6DD88     | Atlastin-3 5.91497227 | 2 | 2 | 2 | 60.5  | 5.66  | 47  | 2 |
| Q9GZZ1     | N-alpha-acc14.2011834 | 2 | 2 | 2 | 19.4  | 8.81  | 39  | 2 |
| B2R6D4     | Phosphomanr 12.601626 | 3 | 3 | 3 | 28    | 6.77  | 69  | 3 |
| C9J8T6     | Cytochrome 16.3265306 | 1 | 1 | 1 | 10.8  | 7.77  | 63  | 1 |
| Q96T37     | Putative R3.27533265  | 2 | 2 | 2 | 107.1 | 10.08 | 50  | 2 |
| 015042     | U2 snRNP-a:3.01263362 | 2 | 2 | 2 | 118.2 | 8.47  | 44  | 2 |
| Q9UBK8     | Methionine 6.20689655 | 3 | 3 | 3 | 80.4  | 6.49  | 29  | 3 |
| F8VXU5     | Vacuolar pi10.2803738 | 2 | 2 | 2 | 24    | 8.18  | 61  | 2 |
| AOA0J9YXF2 | Paraoxonase 8         | 2 | 3 | 2 | 41.5  | 5.72  | 52  | 2 |
| AOA024QZ26 | Histone de:1.64609053 | 2 | 2 | 2 | 131.3 | 5.3   | 57  | 2 |
| 000233     | 26S proteas8.52017937 | 2 | 2 | 2 | 24.7  | 6.95  | 81  | 2 |
| 000461     | Golgi inte:3.87931034 | 2 | 2 | 2 | 81.8  | 4.77  | 47  | 2 |
| 095168     | NADH dehyd27.1317829  | 3 | 3 | 3 | 15.2  | 9.85  | 29  | 3 |
| Q5HY81     | Ubiquitin-111.6666667 | 2 | 2 | 2 | 20.5  | 9.55  | 71  | 2 |
| B2RDN3     | Cytosolic f8.48708487 | 2 | 2 | 2 | 28.9  | 5.83  | 61  | 2 |
| Q9Y223     | Bifunction:4.57063712 | 3 | 3 | 3 | 79.2  | 6.8   | 46  | 3 |

|            |              |             |   |   |   |       |       |    |   |
|------------|--------------|-------------|---|---|---|-------|-------|----|---|
| P28288     | ATP-binding  | 6.676783    | 3 | 3 | 3 | 75.4  | 9.36  | 45 | 3 |
| A4D0V4     | Capping prc  | 9.79020979  | 2 | 3 | 1 | 32.9  | 5.85  | 63 | 2 |
| 075152     | Zinc finger  | 3.45679012  | 2 | 2 | 2 | 89.1  | 8.37  | 70 | 2 |
| 043760     | Synaptogyri  | 8.03571429  | 2 | 2 | 2 | 24.8  | 4.94  | 77 | 2 |
| AOA024QYX3 | RNA binding  | 23.566879   | 3 | 3 | 3 | 17.2  | 8.91  | 22 | 3 |
| Q9BV40     | Vesicle-ass  | 32          | 3 | 3 | 3 | 11.4  | 7.34  | 44 | 3 |
| Q9UHL4     | Dipeptidyl   | 4.87804878  | 2 | 2 | 2 | 54.3  | 6.32  | 56 | 2 |
| Q5TFE4     | 5'-nucleoti  | 6.59340659  | 3 | 3 | 3 | 51.8  | 6.35  | 32 | 3 |
| Q8NB16     | Mixed line   | 7.00636943  | 3 | 3 | 3 | 54.4  | 8.82  | 42 | 3 |
| Q6FI81     | Anamorsin    | (4.16666667 | 1 | 1 | 1 | 33.6  | 5.62  | 64 | 1 |
| 075663     | TIP41-like   | 4.04411765  | 1 | 1 | 1 | 31.4  | 5.91  | 66 | 1 |
| Q9UHI6     | Probable A14 | .61165049   | 3 | 3 | 3 | 92.2  | 6.95  | 25 | 3 |
| Q92542     | Nicastrin    | (3.10296192 | 2 | 2 | 2 | 78.4  | 5.99  | 47 | 2 |
| Q6P3X3     | Tetratricor  | 4.15183867  | 2 | 2 | 2 | 96.6  | 5.59  | 47 | 2 |
| Q68CQ4     | Digestive c  | 5.15873016  | 3 | 3 | 3 | 87    | 5.88  | 37 | 3 |
| Q9BR76     | Coronin-1B   | 5.72597137  | 3 | 3 | 3 | 54.2  | 5.88  | 32 | 3 |
| Q06265     | Exosome con  | 5.46697039  | 2 | 2 | 2 | 48.9  | 5.29  | 63 | 2 |
| C9JAJ9     | Histone-bir  | 45.9459459  | 2 | 2 | 1 | 4.5   | 4.81  | 62 | 2 |
| Q12849     | G-rich seq   | 4.375       | 2 | 2 | 2 | 53.1  | 6.19  | 72 | 2 |
| AOA0S2Z3F2 | V-raf murir  | 1.80032733  | 1 | 1 | 1 | 68    | 9.01  | 62 | 1 |
| Q99805     | Transmembr   | 3.01659125  | 2 | 3 | 2 | 75.7  | 7.44  | 34 | 2 |
| P10644     | cAMP-depend  | 2.88713911  | 1 | 1 | 1 | 43    | 5.35  | 57 | 1 |
| AOA024RDG6 | Scavenger    | 14.81171548 | 2 | 2 | 2 | 54.3  | 5.14  | 45 | 2 |
| P67812     | Signal pept  | 9.4972067   | 2 | 3 | 2 | 20.6  | 9.48  | 81 | 2 |
| Q9BVJ6     | U3 small nt  | 5.31776913  | 3 | 3 | 3 | 87.9  | 7.87  | 18 | 3 |
| Q96ST3     | Paired amp   | 1.7282011   | 2 | 2 | 2 | 145.1 | 7.25  | 53 | 2 |
| P23229     | Integrin al  | 1.7699115   | 2 | 2 | 2 | 126.5 | 6.61  | 64 | 2 |
| Q9ULF5     | Zinc trans   | 2.16606498  | 2 | 2 | 2 | 94.1  | 6.76  | 59 | 2 |
| Q96GM5     | SWI/SNF-rel  | 4.46601942  | 2 | 2 | 2 | 58.2  | 9.25  | 67 | 2 |
| Q16630     | Cleavage ar  | 2.35934664  | 1 | 1 | 1 | 59.2  | 7.15  | 51 | 1 |
| Q01415     | N-acetylgl   | 3.930131    | 2 | 2 | 2 | 50.3  | 6.61  | 49 | 2 |
| Q9UHQ9     | NADH-cyto    | 3.60655738  | 1 | 1 | 1 | 34.1  | 9.38  | 62 | 1 |
| Q96B26     | Exosome con  | 3.98550725  | 1 | 1 | 1 | 30    | 5.3   | 85 | 1 |
| Q14657     | EKC/KEOPS    | c11.1888112 | 1 | 1 | 1 | 14.8  | 8.63  | 56 | 1 |
| P78318     | Immunoglob   | 10.0294985  | 2 | 2 | 2 | 39.2  | 5.38  | 51 | 2 |
| Q7Z7H5     | Transmembr   | 4.84581498  | 1 | 1 | 1 | 25.9  | 8.28  | 58 | 1 |
| AOA140VJF4 | Biliverdin   | 10.472973   | 3 | 3 | 3 | 33.4  | 6.44  | 38 | 3 |
| Q9H3P7     | Golgi resic  | 5.49242424  | 2 | 2 | 2 | 60.6  | 5.06  | 51 | 2 |
| A8KAE0     | cDNA FLJ78   | 3.45438441  | 3 | 3 | 3 | 125.9 | 5.62  | 36 | 3 |
| A8K878     | Mesencephal  | 10.2702703  | 2 | 3 | 2 | 21.1  | 8.92  | 46 | 2 |
| Q5TEC6     | Histone H3   | 19.8529412  | 3 | 5 | 1 | 15.4  | 11.27 | 40 | 3 |
| P16144     | Integrin bc  | 2.14050494  | 3 | 3 | 3 | 202   | 6.09  | 44 | 3 |
| Q99426     | Tubulin-fol  | 11.4754098  | 2 | 2 | 2 | 27.3  | 5.15  | 43 | 2 |
| AOA0AOMTJ9 | Neutral chc  | 2.67857143  | 1 | 1 | 1 | 49.9  | 7.21  | 52 | 1 |
| 075391     | Sperm-assoc  | 10.1321586  | 2 | 2 | 2 | 26    | 7.91  | 47 | 2 |
| Q6IRT1     | S-(hydroxyn  | 10.9625668  | 3 | 3 | 3 | 39.7  | 7.49  | 35 | 3 |
| Q9UNF0     | Protein kir  | 3.49794239  | 2 | 2 | 2 | 55.7  | 5.2   | 61 | 2 |
| E7EQZ4     | Survival mc  | 7.4829932   | 2 | 2 | 2 | 31.7  | 5.71  | 47 | 2 |
| A8K548     | cDNA FLJ75   | 4.07079646  | 2 | 2 | 2 | 119.6 | 4.34  | 0  | 2 |
| V9HW09     | Epididymis   | 5.14285714  | 2 | 2 | 2 | 39.6  | 9.7   | 55 | 2 |
| Q8TC07     | TBC1 domair  | 4.77568741  | 3 | 3 | 3 | 79.4  | 5.67  | 41 | 3 |
| AOA0B4J1V8 | HCG2039996   | 1.76322418  | 1 | 1 | 1 | 87.9  | 9.51  | 76 | 1 |
| 043765     | Small glut   | 8.9456869   | 2 | 2 | 2 | 34    | 4.87  | 33 | 2 |
| Q8N7H5     | RNA polymer  | 6.77966102  | 3 | 3 | 3 | 59.9  | 4.63  | 29 | 3 |
| Q14008     | Cytoskelet   | 1.18110236  | 2 | 2 | 2 | 225.4 | 7.8   | 44 | 2 |
| Q8NFB9     | MLL/SEPTIN   | 5.3667263   | 3 | 3 | 1 | 63.1  | 8.02  | 67 | 3 |
| AOA024QYW3 | Proteolipic  | 18.4210526  | 2 | 3 | 2 | 16.7  | 7.24  | 64 | 2 |
| Q00403     | Transcripti  | 4.43037975  | 1 | 1 | 1 | 34.8  | 8.35  | 57 | 1 |
| Q9H6F5     | Coiled-coi   | 18.88888889 | 2 | 2 | 2 | 40.2  | 10.33 | 45 | 2 |
| Q9Y5J9     | Mitochondri  | 28.9156627  | 2 | 2 | 2 | 9.3   | 5.12  | 42 | 2 |
| Q9Y315     | Deoxyribos   | 7.86163522  | 2 | 2 | 2 | 35.2  | 8.94  | 73 | 2 |
| Q5VW32     | BR01 domair  | 5.83941606  | 2 | 3 | 2 | 46.4  | 7.65  | 73 | 2 |
| P48163     | NADP-depend  | 3.4965035   | 2 | 2 | 2 | 64.1  | 6.13  | 59 | 2 |
| Q15054     | DNA polymer  | 5.36480687  | 2 | 2 | 2 | 51.4  | 9.35  | 51 | 2 |
| B2RE11     | cDNA, FLJ9   | 1.72727273  | 2 | 2 | 2 | 18.4  | 9.44  | 63 | 2 |
| E5RG17     | Putative de  | 7.76397516  | 2 | 2 | 2 | 36.4  | 7.65  | 48 | 2 |
| P42025     | Beta-centr   | 8.24468085  | 2 | 2 | 1 | 42.3  | 6.4   | 44 | 2 |
| Q15059     | Bromodomai   | 2.89256198  | 2 | 2 | 2 | 79.5  | 9.36  | 56 | 2 |
| Q8ND56     | Protein LSM  | 4.31965443  | 2 | 2 | 2 | 50.5  | 9.52  | 45 | 2 |
| AOA0S2Z4Z6 | Serine/argi  | 1.85185185  | 2 | 2 | 2 | 103.9 | 11.84 | 41 | 2 |
| Q86XP3     | ATP-depend   | 3.41151386  | 3 | 3 | 3 | 102.9 | 7.02  | 36 | 3 |
| P07919     | Cytochrome   | 18.6813187  | 3 | 3 | 3 | 10.7  | 4.44  | 47 | 3 |
| P60468     | Protein tr   | 27.0833333  | 2 | 2 | 2 | 10    | 11.56 | 40 | 2 |

|            |              |             |   |   |   |       |       |    |   |
|------------|--------------|-------------|---|---|---|-------|-------|----|---|
| Q9NXH9     | tRNA (guani  | 3.3383915   | 2 | 2 | 2 | 72.2  | 7.64  | 55 | 2 |
| P61803     | Dolichyl-di  | 17.699115   | 2 | 2 | 2 | 12.5  | 7.08  | 77 | 2 |
| Q9BV38     | WD repeat-c  | 2.5462963   | 1 | 1 | 1 | 47.4  | 6.7   | 70 | 1 |
| P36542     | ATP synthas  | 7.04697987  | 2 | 2 | 2 | 33    | 9.22  | 71 | 2 |
| Q13501     | Sequestoson  | 16.5909091  | 3 | 3 | 3 | 47.7  | 5.22  | 28 | 3 |
| F6S8M0     | N-acetylglu  | 4.28082192  | 2 | 2 | 2 | 65.7  | 7.97  | 48 | 2 |
| AOA0S2Z3R6 | Laminin bet  | 3.15699659  | 3 | 3 | 3 | 129.5 | 7.21  | 28 | 3 |
| Q9BTZ2     | Dehydrogen   | 6.11510791  | 2 | 2 | 2 | 29.5  | 8.56  | 70 | 2 |
| Q8IZ83     | Aldehyde de  | 3.36658354  | 2 | 2 | 2 | 85.1  | 6.79  | 28 | 2 |
| O15031     | Plexin-B2 (  | 1.95865071  | 3 | 3 | 3 | 205   | 6.24  | 47 | 3 |
| A5YKK6     | CCR4-NOT t   | 1.38888889  | 3 | 3 | 3 | 266.8 | 7.11  | 45 | 3 |
| AOA024R648 | Translocase  | 34.8314607  | 2 | 2 | 2 | 10.4  | 7.21  | 23 | 2 |
| AOA0X1KG71 | Negative e   | 16.52866242 | 3 | 3 | 3 | 70    | 6.04  | 18 | 3 |
| E7ESZ7     | NADH dehydr  | 4.61538462  | 2 | 2 | 2 | 44.7  | 8.34  | 61 | 2 |
| A4D105     | Replicatio   | 14.8760331  | 2 | 2 | 2 | 13.6  | 5.08  | 68 | 2 |
| Q8N335     | Glycerol-3-  | 5.12820513  | 2 | 2 | 2 | 38.4  | 7.02  | 60 | 2 |
| Q9Y263     | Phospholip   | 4.02515723  | 2 | 2 | 2 | 87.1  | 6.37  | 28 | 2 |
| Q9NQ75     | Exosome con  | 5.45454545  | 1 | 2 | 1 | 29.6  | 8.1   | 55 | 1 |
| P14384     | Carboxypept  | 2.93453725  | 1 | 2 | 1 | 50.5  | 7.36  | 44 | 1 |
| Q6ZSJ8     | Uncharacter  | 10          | 1 | 1 | 1 | 11.5  | 6.73  | 76 | 1 |
| J3QR44     | Cyclin-depe  | 2.64150943  | 2 | 2 | 2 | 92.6  | 5.54  | 64 | 2 |
| Q8N183     | Mimitin, mi  | 19.5266272  | 2 | 2 | 2 | 19.8  | 8.97  | 44 | 2 |
| AOA0S2Z556 | Polyglutami  | 7.47330961  | 2 | 2 | 2 | 32.2  | 6.34  | 74 | 2 |
| AOA0S2Z3G3 | Solute carr  | 8.78378378  | 2 | 2 | 2 | 32.1  | 9.35  | 48 | 2 |
| AOA140VKA9 | Testis secr  | 8.60655738  | 2 | 2 | 2 | 25.8  | 7.37  | 36 | 2 |
| O14684     | Prostaglan   | 13.1578947  | 2 | 2 | 2 | 17.1  | 9.5   | 19 | 2 |
| E7EVH7     | Uncharacter  | 3.00546448  | 2 | 2 | 2 | 83.6  | 7.31  | 36 | 2 |
| P57678     | Gem-associ   | 3.49716446  | 3 | 3 | 3 | 120   | 6.04  | 30 | 3 |
| Q9Y6G9     | Cytoplasmic  | 3.82409178  | 2 | 2 | 2 | 56.5  | 6.42  | 42 | 2 |
| AOA024R7N7 | Interferon,  | 4.4         | 1 | 2 | 1 | 27.9  | 4.88  | 50 | 1 |
| AOA087WV05 | Uncharacter  | 18.1818182  | 2 | 2 | 2 | 12.7  | 6.02  | 57 | 2 |
| Q14573     | Inositol 1,  | 0.78622239  | 3 | 3 | 3 | 303.9 | 6.48  | 69 | 3 |
| O14561     | Acyl carri   | 11.5384615  | 2 | 2 | 2 | 17.4  | 4.93  | 50 | 2 |
| P38435     | Vitamin K-c  | 3.29815303  | 3 | 3 | 3 | 87.5  | 8.02  | 55 | 3 |
| Q8WW59     | SPRY domai   | 10.1449275  | 2 | 2 | 2 | 23.1  | 6.93  | 36 | 2 |
| Q9NTI5     | Sister chrc  | 2.34968901  | 2 | 2 | 2 | 164.6 | 8.47  | 40 | 2 |
| A8ASI8     | BH3 interac  | 6.66666667  | 1 | 1 | 1 | 22    | 5.44  | 62 | 1 |
| Q9Y316     | Protein ME   | 6.73400673  | 2 | 2 | 2 | 33.7  | 7.14  | 53 | 2 |
| AOA024R0R4 | SUMO-1 acti  | 6.93641618  | 2 | 2 | 2 | 38.4  | 5.3   | 50 | 2 |
| Q9Y3L5     | Ras-relate   | 10.9289617  | 2 | 2 | 2 | 20.7  | 4.94  | 50 | 2 |
| AOA024QZR3 | Protein pel  | 4.41558442  | 2 | 2 | 1 | 43.4  | 6.34  | 66 | 2 |
| Q99614     | Tetratricof  | 8.90410959  | 2 | 2 | 2 | 33.5  | 4.84  | 38 | 2 |
| Q9BUT1     | 3-hydroxybi  | 15.1020408  | 3 | 3 | 3 | 26.7  | 7.65  | 18 | 3 |
| Q6PL18     | ATPase fami  | 2.58992806  | 3 | 3 | 3 | 158.5 | 6.32  | 30 | 3 |
| AOA140T9T7 | Antigen pep  | 1.73267327  | 1 | 1 | 1 | 87.1  | 8.02  | 51 | 1 |
| Q969G3     | SWI/SNF-re   | 15.59610706 | 2 | 2 | 2 | 46.6  | 4.88  | 44 | 2 |
| AOA0S2Z497 | Peroxisoma   | 18.3946488  | 3 | 3 | 2 | 32.8  | 4.34  | 0  | 3 |
| Q9NY12     | H/ACA ribor  | 13.3640553  | 2 | 2 | 2 | 22.3  | 10.92 | 39 | 2 |
| Q6FII1     | Glutathion   | 11.5044248  | 2 | 2 | 2 | 25.5  | 8.41  | 45 | 2 |
| Q9Y3B8     | Oligoribon   | 7.59493671  | 2 | 2 | 2 | 26.8  | 6.87  | 56 | 2 |
| Q6IAX1     | FDFT1 prote  | 9.59232614  | 3 | 3 | 3 | 48.1  | 6.54  | 51 | 3 |
| P62304     | Small nucl   | 25          | 2 | 2 | 2 | 10.8  | 9.44  | 43 | 2 |
| O75607     | Nucleoplas   | 13.4831461  | 2 | 2 | 2 | 19.3  | 4.63  | 55 | 2 |
| O00487     | 26S protea   | 4.19354839  | 1 | 1 | 1 | 34.6  | 6.52  | 54 | 1 |
| Q8WVJ2     | NudC domai   | 19.1082803  | 3 | 3 | 3 | 17.7  | 5.07  | 39 | 3 |
| Q7L5N1     | COP9 signa   | 7.95107034  | 2 | 2 | 2 | 36.1  | 5.73  | 37 | 2 |
| P22059     | Oxysterol-t  | 6.07187113  | 3 | 3 | 3 | 89.4  | 7.3   | 0  | 3 |
| Q8TCT9     | Minor hist   | 3.18302387  | 1 | 1 | 1 | 41.5  | 6.43  | 70 | 1 |
| Q13405     | 39S riboso   | 16.2650602  | 2 | 2 | 2 | 19.2  | 9.45  | 27 | 2 |
| B4E0Y9     | Serine/thrc  | 3.42465753  | 1 | 1 | 1 | 49.2  | 5.68  | 48 | 1 |
| Q9P265     | Disco-inter  | 2.41116751  | 3 | 3 | 3 | 171.4 | 8.09  | 30 | 3 |
| P51003     | Poly(A) poll | 1.61073826  | 1 | 1 | 1 | 82.8  | 7.37  | 62 | 1 |
| G5EA03     | LIM and cal  | 0.88616224  | 1 | 1 | 1 | 164.3 | 6.35  | 75 | 1 |
| Q59HD5     | 3-mercaptor  | 6.68789809  | 2 | 2 | 2 | 34.7  | 7.24  | 62 | 2 |
| Q14914     | Prostaglan   | 3.03951368  | 1 | 1 | 1 | 35.8  | 8.29  | 73 | 1 |
| B2R673     | Dihydrolipe  | 4.79041916  | 2 | 2 | 2 | 54    | 8.76  | 57 | 2 |
| Q96HS1     | Serine/thrc  | 5.88235294  | 2 | 2 | 2 | 32    | 8.68  | 57 | 2 |
| Q7Z4H3     | HD domain-c  | 6.8627451   | 1 | 1 | 1 | 23.4  | 5.49  | 51 | 1 |
| B4DTK7     | cDNA FLJ61   | 3.3776868   | 2 | 2 | 2 | 108.9 | 8.44  | 49 | 2 |
| Q658N3     | Down-regul   | 7.95454545  | 1 | 1 | 1 | 19.4  | 4.75  | 73 | 1 |
| Q16718     | NADH dehydr  | 8.62068966  | 2 | 2 | 2 | 13.5  | 5.99  | 53 | 2 |
| P43353     | Aldehyde de  | 5.34188034  | 2 | 2 | 2 | 51.8  | 7.62  | 41 | 2 |
| AOA024RE04 | Uncharacter  | 3.53200883  | 1 | 1 | 1 | 52.1  | 8.47  | 42 | 1 |

|            |               |             |   |   |   |       |       |    |   |
|------------|---------------|-------------|---|---|---|-------|-------|----|---|
| Q9UK76     | Hematologic   | 21.4285714  | 2 | 2 | 2 | 16    | 5.6   | 26 | 2 |
| Q9BXY0     | Protein MAF6  | .33333333   | 2 | 2 | 2 | 35.3  | 5.38  | 54 | 2 |
| D7RF68     | AGTRAP-BRAF3  | .68509213   | 1 | 3 | 1 | 66.2  | 8.9   | 43 | 1 |
| AOA0S2Z5U7 | Diablo-like12 | .9707113    | 2 | 2 | 2 | 27.1  | 5.9   | 51 | 2 |
| B2RAM6     | cDNA, FLJ9f2  | .84090909   | 3 | 3 | 3 | 119.1 | 5.72  | 29 | 3 |
| Q9H9B4     | Sideroflexi7  | .14285714   | 2 | 2 | 2 | 35.6  | 9.07  | 43 | 2 |
| AOA087X1E4 | Arfaptin-2    | 7.48663102  | 2 | 2 | 2 | 41.6  | 6.38  | 53 | 2 |
| A6NFX8     | ADP-sugar r1  | 6.46551724  | 1 | 2 | 1 | 25.9  | 5.19  | 94 | 1 |
| B2RBE0     | cDNA, FLJ9f3  | .05555556   | 2 | 2 | 1 | 80.3  | 8.46  | 58 | 2 |
| 075832     | 26S proteas   | 9.73451327  | 2 | 2 | 2 | 24.4  | 6.1   | 33 | 2 |
| Q96L92     | Sorting nex   | 4.25138632  | 2 | 2 | 2 | 61.2  | 6.49  | 56 | 2 |
| A3F768     | NF-kappaB i2  | .89855072   | 2 | 2 | 2 | 77.5  | 8.73  | 30 | 2 |
| Q13131     | 5'-AMP-acti   | 4.83005367  | 2 | 2 | 2 | 64    | 8.12  | 61 | 2 |
| HOY9B6     | Beta-hexosa   | 16.8316832  | 3 | 3 | 3 | 23.2  | 5.19  | 29 | 3 |
| Q9COE8     | Protein lur   | 6.07476636  | 2 | 2 | 2 | 47.7  | 5.11  | 37 | 2 |
| A8K761     | NADH dehyd    | 6.39534884  | 1 | 1 | 1 | 20.8  | 8.48  | 65 | 1 |
| Q9H0W9     | Ester hydr    | 10.4761905  | 2 | 2 | 2 | 35.1  | 6.7   | 42 | 2 |
| B2R7T6     | cDNA, FLJ9f8  | .88888889   | 3 | 3 | 3 | 49.9  | 9.06  | 38 | 3 |
| AOA0S2Z4R4 | Hepatocyte    | 2.96010296  | 2 | 2 | 2 | 86.1  | 6.16  | 37 | 2 |
| P52758     | Ribonuclea    | 19.7080292  | 2 | 2 | 2 | 14.5  | 8.68  | 0  | 2 |
| P49720     | Proteasome    | 12.195122   | 2 | 2 | 2 | 22.9  | 6.55  | 61 | 2 |
| MOQXB5     | Persulfide    | 9.23076923  | 2 | 2 | 2 | 28.4  | 6.52  | 41 | 2 |
| Q96I25     | Splicing f    | 6.48379052  | 2 | 2 | 2 | 44.9  | 5.97  | 39 | 2 |
| Q9UNE7     | E3 ubiquiti   | 8.91089109  | 3 | 3 | 3 | 34.8  | 5.87  | 34 | 3 |
| Q5T5H1     | Alpha-endo    | 10.6951872  | 2 | 2 | 2 | 21    | 7.87  | 50 | 2 |
| Q92614     | Unconventi    | 1.26582278  | 2 | 2 | 2 | 233   | 6.3   | 35 | 2 |
| 043920     | NADH dehyd    | 23.5849057  | 3 | 3 | 3 | 12.5  | 9.14  | 45 | 3 |
| 075934     | Pre-mRNA-s    | 9.77777778  | 2 | 2 | 2 | 26.1  | 5.66  | 43 | 2 |
| B2R680     | Signal trar   | 0.94451004  | 1 | 2 | 1 | 94.1  | 6.23  | 49 | 1 |
| Q9UIJ7     | GTP:AMP ph    | 14.9779736  | 3 | 3 | 3 | 25.6  | 9.16  | 46 | 3 |
| AOA087WU53 | Magnesium     | 14.90463215 | 2 | 2 | 2 | 41.5  | 9.94  | 65 | 2 |
| Q9H9P8     | L-2-hydroxy   | 6.91144708  | 3 | 3 | 3 | 50.3  | 8.15  | 39 | 3 |
| Q04206     | Transcripti   | 3.81125227  | 2 | 2 | 2 | 60.2  | 5.68  | 46 | 2 |
| Q16775     | Hydroxyacy    | 17.79220779 | 2 | 2 | 2 | 33.8  | 8.12  | 45 | 2 |
| E9PAU2     | Ribonucleo    | 4.62962963  | 2 | 2 | 2 | 79.5  | 8.92  | 28 | 2 |
| P16278     | Beta-galac    | 14.28360414 | 2 | 2 | 2 | 76    | 6.57  | 40 | 2 |
| Q8TDN6     | Ribosome bi   | 8.49858357  | 3 | 3 | 3 | 41.4  | 9.92  | 35 | 3 |
| AOA0S2Z5H3 | Clathrin ir   | 1.86625194  | 1 | 1 | 1 | 70.3  | 6.58  | 66 | 1 |
| Q9P287     | BRCA2 and     | 7.6433121   | 2 | 2 | 2 | 36    | 4.61  | 48 | 2 |
| Q9BWJ5     | Splicing f    | 30.2325581  | 2 | 2 | 2 | 10.1  | 6.35  | 58 | 2 |
| Q96GQ7     | Probable A    | 13.64321608 | 3 | 3 | 3 | 89.8  | 9.28  | 40 | 3 |
| Q9POM9     | 39S riboso    | 14.1891892  | 2 | 2 | 2 | 16.1  | 10.42 | 44 | 2 |
| MOR1T5     | Charged mu    | 17.92951542 | 2 | 2 | 2 | 24.9  | 5.27  | 64 | 2 |
| Q9HAB8     | Phosphopan    | 16.43086817 | 2 | 2 | 2 | 34    | 6.71  | 41 | 2 |
| P30536     | Translocat    | 9.46745562  | 2 | 2 | 2 | 18.8  | 9.36  | 50 | 2 |
| AOA087WUB9 | Beta-cateni   | 4.04929577  | 2 | 2 | 2 | 65.7  | 5.02  | 54 | 2 |
| Q5IRN4     | Myocyte en    | 5.48523207  | 2 | 3 | 1 | 50.4  | 7.44  | 41 | 2 |
| B2RD51     | Proteasome    | 7.29166667  | 2 | 2 | 2 | 32.9  | 7.17  | 38 | 2 |
| Q15654     | Thyroid rec   | 5.04201681  | 2 | 2 | 2 | 50.3  | 7.37  | 35 | 2 |
| G8JLH6     | Tetraspani    | 4.38596491  | 1 | 2 | 1 | 25.4  | 6.52  | 87 | 1 |
| B3KM74     | cDNA FLJ10    | 7.98479087  | 2 | 2 | 2 | 29.6  | 6.77  | 0  | 2 |
| Q10713     | Mitochondr    | 3.23809524  | 2 | 2 | 2 | 58.2  | 6.92  | 45 | 2 |
| J3KNL6     | Protein tr    | 0.80610946  | 2 | 2 | 2 | 251.7 | 5.8   | 66 | 2 |
| Q96I99     | Succinate--   | 4.39814815  | 2 | 2 | 2 | 46.5  | 6.39  | 42 | 2 |
| Q15642     | Cdc42-inter   | 3.49417637  | 2 | 2 | 2 | 68.3  | 5.73  | 46 | 2 |
| Q9Y5J1     | U3 small nt   | 2.3381295   | 1 | 1 | 1 | 62    | 8.76  | 56 | 1 |
| Q9BRX8     | Redox-regu    | 18.29694323 | 2 | 2 | 2 | 25.7  | 8.84  | 52 | 2 |
| Q92905     | COP9 signa    | 12.99401198 | 1 | 1 | 1 | 37.6  | 6.54  | 66 | 1 |
| AOA0S2Z462 | ArfGAP wit    | 15.64784053 | 2 | 2 | 2 | 62.6  | 8.56  | 0  | 2 |
| P13984     | General tr    | 8.83534137  | 2 | 2 | 2 | 28.4  | 9.23  | 44 | 2 |
| P10301     | Ras-relate    | 12.3853211  | 2 | 2 | 2 | 23.5  | 6.93  | 55 | 2 |
| V9HWG3     | Epididymis    | 1.8922853   | 1 | 1 | 1 | 77.3  | 5.22  | 66 | 1 |
| Q722Z2     | Elongation    | 3.48214286  | 2 | 2 | 2 | 125.4 | 5.91  | 28 | 2 |
| Q9H7B2     | Ribosome p    | 16.8627451  | 2 | 2 | 2 | 35.6  | 9.99  | 36 | 2 |
| Q969V3     | Nicalin OS    | -7.10479574 | 3 | 4 | 3 | 62.9  | 6.89  | 32 | 3 |
| B4DT57     | cDNA FLJ61    | 3.33333333  | 1 | 1 | 1 | 50    | 5.6   | 73 | 1 |
| Q9UKV8     | Protein ar    | 2.67753201  | 2 | 2 | 2 | 97.1  | 9.19  | 41 | 2 |
| Q8N766     | ER membran    | 2.11480363  | 2 | 2 | 2 | 111.7 | 7.66  | 30 | 2 |
| Q7KZN9     | Cytochrome    | 4.63414634  | 2 | 2 | 2 | 46    | 9.82  | 45 | 2 |
| Q9BZ17     | Regulator     | 6.41821946  | 3 | 3 | 3 | 57.7  | 9.48  | 36 | 3 |
| Q6PJT7     | Zinc finger   | 2.85326087  | 2 | 2 | 2 | 82.8  | 7.31  | 50 | 2 |
| B4DEE8     | cDNA FLJ5     | 6.966386555 | 2 | 2 | 2 | 25    | 8.66  | 38 | 2 |
| AOA0AOMTNO | Cullin-2 O    | 2.63852243  | 2 | 2 | 2 | 88.4  | 6.93  | 54 | 2 |

|            |                         |   |   |   |       |       |    |   |
|------------|-------------------------|---|---|---|-------|-------|----|---|
| P10155     | 60 kDa SS-13.71747212   | 2 | 2 | 2 | 60.6  | 8.03  | 42 | 2 |
| Q96B97     | SH3 domain- 3.7593985   | 2 | 2 | 2 | 73.1  | 6.62  | 36 | 2 |
| Q9BUL9     | Ribonuclea6.53266332    | 1 | 1 | 1 | 20.6  | 9.61  | 62 | 1 |
| P33897     | ATP-binding4.56375839   | 2 | 2 | 2 | 82.9  | 8.95  | 46 | 2 |
| Q9H2M9     | Rab3 GTPase1.79468772   | 2 | 2 | 2 | 155.9 | 5.62  | 0  | 2 |
| Q8NCA5     | Protein FA5.58766859    | 2 | 2 | 2 | 55.4  | 9.03  | 54 | 2 |
| H3BTB6     | COX assembl10.7526882   | 1 | 1 | 1 | 10.6  | 8.27  | 57 | 1 |
| Q6L8Q7     | 2',5'-phos3.77668309    | 2 | 2 | 2 | 67.3  | 6.57  | 43 | 2 |
| Q96EE3     | Nucleoporin6.94444444   | 2 | 2 | 2 | 39.6  | 8.09  | 35 | 2 |
| Q9UMX5     | Neudesin 05.11.627907   | 2 | 2 | 2 | 18.8  | 5.69  | 43 | 2 |
| O95801     | Tetratricof5.42635659   | 2 | 2 | 2 | 44.7  | 5.6   | 58 | 2 |
| C9JCC6     | Drl-associ5.18867925    | 1 | 1 | 1 | 23.2  | 5.27  | 63 | 1 |
| Q70UQ0     | Inhibitor c5.42857143   | 2 | 2 | 2 | 39.3  | 9.17  | 51 | 2 |
| Q59EK0     | Epsilon isc4.39121756   | 2 | 2 | 2 | 57.9  | 8.24  | 42 | 2 |
| Q9BS40     | Latexin OS-8.55855856   | 2 | 2 | 2 | 25.7  | 5.78  | 38 | 2 |
| Q14126     | Desmoglein-3.22003578   | 2 | 2 | 2 | 122.2 | 5.24  | 37 | 2 |
| B2RAH5     | Protein phc 2.7184466   | 2 | 2 | 2 | 115.3 | 5.43  | 39 | 2 |
| O00178     | GTP-binding1.49476831   | 1 | 1 | 1 | 72.4  | 8.34  | 70 | 1 |
| Q9Y639     | Neuroplastin7.03517588  | 2 | 2 | 2 | 44.4  | 7.99  | 36 | 2 |
| AOA087XOR6 | Sorting nex14.5348837   | 3 | 3 | 2 | 19.8  | 7.78  | 44 | 3 |
| P17050     | Alpha-N-ace5.59610706   | 2 | 2 | 2 | 46.5  | 5.19  | 53 | 2 |
| C9IZQ1     | Translocon-6.37583893   | 2 | 3 | 2 | 33.9  | 4.69  | 49 | 2 |
| A8K8F6     | cDNA FLJ788.40336134    | 2 | 2 | 2 | 41.4  | 9.06  | 51 | 2 |
| AOA075B6F9 | Nitric oxid6.57894737   | 2 | 2 | 2 | 33.4  | 8.72  | 34 | 2 |
| AOA024QZF1 | HCG19665.13.25670498    | 1 | 1 | 1 | 53.2  | 5.31  | 0  | 1 |
| B4DKQ5     | cDNA FLJ5478.58283433   | 2 | 2 | 2 | 54.8  | 4.81  | 26 | 2 |
| Q4FZ45     | Chromosome 5.55555556   | 1 | 1 | 1 | 23.4  | 9.7   | 56 | 1 |
| Q13443     | Disintegrin1.70940171   | 1 | 1 | 1 | 90.5  | 7.52  | 48 | 1 |
| P05161     | Ubiquitin-113.3333333   | 2 | 2 | 2 | 17.9  | 7.44  | 37 | 2 |
| Q9Y570     | Protein phc5.44041451   | 2 | 2 | 2 | 42.3  | 5.97  | 46 | 2 |
| Q96KA5     | Cleft lip 4.46096654    | 2 | 2 | 2 | 62.2  | 8.56  | 37 | 2 |
| B3KM21     | Family with22.0338983   | 2 | 2 | 2 | 13.3  | 8.76  | 36 | 2 |
| P50336     | Protoporph4.40251572    | 2 | 3 | 2 | 50.7  | 8.16  | 39 | 2 |
| Q9Y3B4     | Splicing fac 11.2       | 1 | 2 | 1 | 14.6  | 9.38  | 59 | 1 |
| G3V3D1     | Epididymal 11.7647059   | 2 | 2 | 2 | 23.7  | 6.73  | 40 | 2 |
| O75940     | Survival of8.82352941   | 1 | 1 | 1 | 26.7  | 7.24  | 0  | 1 |
| Q96C23     | Aldose 1-ep8.47953216   | 2 | 2 | 2 | 37.7  | 6.65  | 31 | 2 |
| O15162     | Phospholipid4.08805031  | 1 | 1 | 1 | 35    | 4.94  | 44 | 1 |
| AOA087WTWO | E3 ubiquitin2.91715286  | 2 | 2 | 2 | 96.6  | 8.34  | 46 | 2 |
| Q9Y446     | Plakophilin1.12923463   | 1 | 1 | 1 | 87    | 9.32  | 63 | 1 |
| F1T0A5     | PRP31 pre-n4.60921844   | 2 | 2 | 2 | 55.4  | 5.78  | 35 | 2 |
| Q13618     | Cullin-3 OS3.77604167   | 2 | 2 | 2 | 88.9  | 8.48  | 35 | 2 |
| Q96CW5     | Gamma-tubul2.42557883   | 2 | 2 | 2 | 103.5 | 8.12  | 43 | 2 |
| Q16795     | NADH dehyd5.30503979    | 2 | 2 | 2 | 42.5  | 9.8   | 26 | 2 |
| P48507     | Glutamate--10.2189781   | 2 | 2 | 2 | 30.7  | 6.02  | 26 | 2 |
| Q66MV3     | Putative p18.5714286    | 2 | 2 | 2 | 15.8  | 9.1   | 35 | 2 |
| O94925     | Glutaminase4.63378176   | 2 | 2 | 2 | 73.4  | 7.77  | 29 | 2 |
| P27144     | Adenylate 19.86547085   | 2 | 3 | 2 | 25.3  | 8.4   | 32 | 2 |
| Q9HCS7     | Pre-mRNA-sp1.40350877   | 1 | 1 | 1 | 99.9  | 6.23  | 49 | 1 |
| Q9NQT8     | Kinesin-1110.60240964   | 1 | 1 | 1 | 202.7 | 5.88  | 55 | 1 |
| Q9Y3B3     | Transmembr5.35714286    | 1 | 1 | 1 | 25.2  | 6.89  | 53 | 1 |
| Q59HH7     | X-ray repair1.54559505  | 1 | 1 | 1 | 71    | 6.04  | 57 | 1 |
| P51553     | Isocitrate 4.58015267   | 2 | 2 | 2 | 42.8  | 8.5   | 50 | 2 |
| B4DGG0     | cDNA FLJ5810.8247423    | 2 | 2 | 2 | 22.2  | 8.43  | 44 | 2 |
| Q96KB5     | Lymphokine-6.21118012   | 2 | 2 | 2 | 36.1  | 5.12  | 33 | 2 |
| Q9GZZ9     | Ubiquitin-16.18811881   | 2 | 2 | 2 | 44.8  | 4.84  | 35 | 2 |
| P00403     | Cytochrome 7.48898678   | 2 | 3 | 2 | 25.5  | 4.82  | 66 | 2 |
| Q8TEM4     | FLJ00169 p17.17592593   | 2 | 2 | 2 | 46.5  | 11.55 | 20 | 2 |
| K7ERV3     | Thymidine 19.36329588   | 2 | 2 | 2 | 28.6  | 8.56  | 0  | 2 |
| S4R369     | 39S ribosom 3.3126294   | 1 | 1 | 1 | 54.9  | 9.42  | 48 | 1 |
| Q92882     | Osteoclast-10.7476636   | 3 | 3 | 3 | 23.8  | 5.68  | 45 | 3 |
| P34949     | Mannose-6-T3.54609929   | 1 | 1 | 1 | 46.6  | 5.95  | 63 | 1 |
| Q92482     | Aquaporin-2.73972603    | 1 | 1 | 1 | 31.5  | 7.23  | 51 | 1 |
| Q9H3U1     | Protein unc2.64830508   | 2 | 2 | 2 | 103   | 6.07  | 45 | 2 |
| AOA0G2JM12 | Casein kinase3.61842105 | 1 | 2 | 1 | 34.7  | 4.59  | 49 | 1 |
| Q4G0J3     | La-related 3.95189003   | 2 | 2 | 2 | 66.9  | 9.55  | 36 | 2 |
| P60602     | Reactive o21.5189873    | 1 | 1 | 1 | 8.2   | 9.33  | 0  | 1 |
| Q9Y2L1     | Exosome con2.71398747   | 2 | 2 | 2 | 108.9 | 7.14  | 37 | 2 |
| MOQXB4     | Coatomer p19.06344411   | 2 | 3 | 2 | 36.9  | 5.16  | 27 | 2 |
| A8K5R6     | Golgi SNAP 5.2          | 1 | 1 | 1 | 28.6  | 9.42  | 51 | 1 |
| P49916     | DNA ligase 3.17145689   | 3 | 3 | 3 | 112.8 | 9.01  | 23 | 3 |
| P82650     | 28S ribosom3.33333333   | 1 | 1 | 1 | 41.3  | 7.9   | 49 | 1 |
| P20645     | Cation-depe5.05415162   | 1 | 1 | 1 | 31    | 5.83  | 43 | 1 |

|            |             |              |   |   |   |       |       |    |   |
|------------|-------------|--------------|---|---|---|-------|-------|----|---|
| Q9BTV4     | Transmembr  | 2.5          | 1 | 2 | 1 | 44.8  | 8.13  | 35 | 1 |
| J3QRU1     | Tyrosine-p  | 7.84671533   | 2 | 2 | 2 | 61.3  | 6.57  | 44 | 2 |
| 000267     | Transcripti | 1.93192272   | 2 | 2 | 2 | 120.9 | 5.06  | 45 | 2 |
| B3KWW6     | cDNA FLJ43  | 1.9123506    | 2 | 2 | 2 | 145.4 | 7.61  | 39 | 2 |
| A8K8B0     | cDNA FLJ76  | 5.54722639   | 3 | 3 | 2 | 73.5  | 5.1   | 22 | 3 |
| AOA024QZE9 | Uncharacter | 4.82758621   | 1 | 1 | 1 | 32.4  | 5.07  | 37 | 1 |
| Q9NV11     | Fanconi ane | 1.5060241    | 2 | 2 | 2 | 149.2 | 6.74  | 0  | 2 |
| Q86XZ4     | Spermatoge  | 4.95412844   | 2 | 2 | 2 | 59.5  | 8.9   | 25 | 2 |
| AOA1BOGUS4 | HCG1789360  | 16.2337662   | 2 | 2 | 1 | 17.9  | 7.84  | 27 | 2 |
| P26232     | Catenin al  | 1.7838405    | 1 | 1 | 1 | 105.2 | 5.71  | 52 | 1 |
| Q8WUK0     | Phosphatid  | 7.46268657   | 2 | 2 | 2 | 22.8  | 9.77  | 36 | 2 |
| P06396     | Gelsolin O  | 3.32480818   | 3 | 3 | 3 | 85.6  | 6.28  | 35 | 3 |
| Q96QR8     | Transcripti | 4.16666667   | 1 | 1 | 1 | 33.2  | 5.43  | 37 | 1 |
| Q9Y520     | Protein PR  | 0.69060773   | 2 | 2 | 2 | 316.7 | 9.13  | 44 | 2 |
| Q9NP77     | RNA polyme  | 6.18556701   | 1 | 1 | 1 | 22.6  | 5.33  | 50 | 1 |
| A8K556     | cDNA FLJ78  | 7.00280112   | 2 | 2 | 2 | 40.3  | 8.15  | 35 | 2 |
| B2RE29     | cDNA, FLJ9  | 7.73480663   | 1 | 1 | 1 | 20.5  | 6.35  | 66 | 1 |
| P52815     | 39S riboso  | 11.6161616   | 2 | 2 | 2 | 21.3  | 8.87  | 21 | 2 |
| Q8IYS1     | Peptidase   | 12.52293578  | 1 | 1 | 1 | 47.7  | 5.85  | 41 | 1 |
| AOA0S2Z5M8 | ElaC homol  | 2.66343826   | 2 | 2 | 2 | 92.2  | 7.9   | 33 | 2 |
| Q4LE38     | IKBKAP vari | 2.68256334   | 2 | 2 | 2 | 151.4 | 6     | 22 | 2 |
| Q9NRC9     | Aladin OS   | =4.02930403  | 2 | 2 | 2 | 59.5  | 7.5   | 40 | 2 |
| Q9UBR2     | Cathepsin   | 73.96039604  | 1 | 1 | 1 | 33.8  | 7.11  | 53 | 1 |
| AOA024R8R4 | Nuclear pr  | 2.96052632   | 2 | 2 | 2 | 68.1  | 6.38  | 45 | 2 |
| Q92665     | 28S riboso  | 3.79746835   | 1 | 1 | 1 | 45.3  | 9.29  | 24 | 1 |
| Q13907     | Isopenten   | 110.1321586  | 2 | 2 | 2 | 26.3  | 6.34  | 36 | 2 |
| Q8NI36     | WD repeat   | =2.73396425  | 2 | 2 | 2 | 105.3 | 7.53  | 31 | 2 |
| Q0ZFE3     | ATP syntha  | 4.42477876   | 1 | 1 | 1 | 24.8  | 10.1  | 62 | 1 |
| 075964     | ATP syntha  | 24.2718447   | 2 | 3 | 2 | 11.4  | 9.64  | 36 | 2 |
| AOA0AOMT64 | NADPH:adre  | 3.74531835   | 2 | 2 | 2 | 58.2  | 7.87  | 54 | 2 |
| Q59H39     | Signal trar | 2.66497462   | 2 | 3 | 2 | 89.9  | 6.2   | 41 | 2 |
| AOA0AOMTH3 | Integrin-li | 3.3126294    | 2 | 2 | 2 | 54.6  | 7.97  | 37 | 2 |
| Q9H1E3     | Nuclear ubi | 4.52674897   | 2 | 2 | 2 | 27.3  | 5.08  | 72 | 2 |
| B8ZWD9     | Diazepam bi | 12.5         | 2 | 2 | 2 | 16.1  | 5.05  | 38 | 2 |
| Q9NX20     | 39S riboso  | 6.37450199   | 2 | 2 | 2 | 28.4  | 10.13 | 42 | 2 |
| Q9NX46     | Poly(ADP-r  | 3.85674931   | 1 | 1 | 1 | 38.9  | 5.07  | 43 | 1 |
| 043823     | A-kinase ar | 1.87861272   | 1 | 1 | 1 | 76.1  | 5.15  | 58 | 1 |
| 075165     | DnaJ homol  | 0.98082925   | 2 | 2 | 2 | 254.3 | 6.74  | 28 | 2 |
| Q9UIG0     | Tyrosine-p  | 1.14632502   | 2 | 2 | 2 | 170.8 | 8.48  | 39 | 2 |
| Q9H4A6     | Golgi phos  | 5.03355705   | 1 | 1 | 1 | 33.8  | 6.44  | 44 | 1 |
| P53611     | Geranylger  | 6.64652568   | 2 | 2 | 2 | 36.9  | 5.03  | 30 | 2 |
| Q96EL3     | 39S riboso  | 8.92857143   | 1 | 1 | 1 | 12.1  | 8.76  | 44 | 1 |
| B1AKZ4     | Phosphopro  | 7.69230769   | 1 | 1 | 1 | 15    | 5.02  | 51 | 1 |
| P57737     | Coronin-7   | (2.48648649  | 2 | 2 | 2 | 100.5 | 5.8   | 0  | 2 |
| B2RBI2     | cDNA, FLJ9  | 5.68181818   | 1 | 1 | 1 | 39.9  | 4.53  | 0  | 1 |
| Q9Y2R0     | Cytochrome  | 9.43396226   | 1 | 1 | 1 | 11.7  | 9.6   | 64 | 1 |
| Q53GS9     | U4/U6. U5   | tr3.71681416 | 2 | 2 | 2 | 65.3  | 8.91  | 21 | 2 |
| 060341     | Lysine-spec | 2.34741784   | 2 | 2 | 2 | 92.8  | 6.52  | 44 | 2 |
| P28799     | Granulins   | (4.04721754  | 2 | 2 | 2 | 63.5  | 6.83  | 40 | 2 |
| Q6PKG0     | La-related  | 1.82481752   | 2 | 2 | 2 | 123.4 | 8.82  | 25 | 2 |
| Q8WXF1     | Paraspeckl  | 3.4416826    | 2 | 2 | 1 | 58.7  | 6.67  | 43 | 2 |
| Q8TDD1     | ATP-depend  | 3.6322361    | 2 | 2 | 2 | 98.5  | 10.02 | 16 | 2 |
| AOA0S2Z2Z3 | ATP-binding | 2.6560425    | 2 | 2 | 2 | 82.7  | 9.33  | 42 | 2 |
| P51159     | Ras-relate  | 4.97737557   | 1 | 1 | 1 | 24.9  | 5.22  | 38 | 1 |
| AOA075B6G3 | Dystrophin  | 0.70556309   | 2 | 2 | 2 | 426.5 | 5.9   | 38 | 2 |
| AOA0S2Z5J4 | Adaptor-re  | 11.09689214  | 1 | 1 | 1 | 121.2 | 6.04  | 46 | 1 |
| AOA087X117 | Nodal modul | 1.73638516   | 2 | 2 | 2 | 139.4 | 5.85  | 52 | 2 |
| HOY8X4     | 2'-deoxynu  | 10.2880658   | 2 | 3 | 2 | 25.9  | 5.5   | 48 | 2 |
| B3KWH9     | Elongation  | 3.01003344   | 1 | 1 | 1 | 35.3  | 9.41  | 64 | 1 |
| Q8IV08     | Phospholip  | 2.04081633   | 1 | 1 | 1 | 54.7  | 6.47  | 49 | 1 |
| 043156     | TEL02-inter | 1.2855831    | 1 | 1 | 1 | 122   | 5.97  | 55 | 1 |
| 060271     | C-Jun-aminc | 2.11960636   | 2 | 2 | 2 | 146.1 | 5.15  | 22 | 2 |
| D3DU92     | RNA binding | 7.86885246   | 2 | 2 | 2 | 34.2  | 11.84 | 25 | 2 |
| AOA087WWE2 | DNA-direct  | 0.45454545   | 1 | 1 | 1 | 218.1 | 7.85  | 50 | 1 |
| Q9BRR6     | ADP-depend  | 3.2193159    | 1 | 1 | 1 | 54.1  | 6.2   | 51 | 1 |
| P49841     | Glycogen sy | 7.61904762   | 2 | 3 | 2 | 46.7  | 8.78  | 27 | 2 |
| Q9NWB6     | Arginine ar | 5.86080586   | 2 | 2 | 2 | 33.2  | 10.35 | 0  | 2 |
| Q6NX51     | Exocyst con | 1.43737166   | 1 | 1 | 1 | 110.4 | 6.49  | 41 | 1 |
| B2R5S3     | cDNA, FLJ9  | 4.81400438   | 2 | 2 | 2 | 50.2  | 8.31  | 26 | 2 |
| Q9UDW1     | Cytochrome  | 26.984127    | 1 | 1 | 1 | 7.3   | 9.47  | 0  | 1 |
| Q13541     | Eukaryotic  | 10.1694915   | 1 | 1 | 1 | 12.6  | 5.48  | 52 | 1 |
| 015294     | UDP-N-acety | 2.48565966   | 2 | 2 | 2 | 116.9 | 6.7   | 56 | 2 |
| 060563     | Cyclin-T1   | (1.79063361  | 1 | 1 | 1 | 80.6  | 8.78  | 54 | 1 |



|            |              |             |   |   |   |       |       |    |   |
|------------|--------------|-------------|---|---|---|-------|-------|----|---|
| B2CIS9     | Caspase 14,6 | 6.1157025   | 2 | 2 | 2 | 27.7  | 5.58  | 55 | 2 |
| B2RDZ9     | cDNA, FLJ9   | 9.27835052  | 2 | 2 | 2 | 31.9  | 5.27  | 30 | 2 |
| Q6P996     | Pyridoxal-c  | 3.04568528  | 2 | 2 | 2 | 86.7  | 5.38  | 0  | 2 |
| AOA024R5X7 | ClpX caseir  | 3.31753555  | 2 | 2 | 2 | 69.2  | 7.58  | 28 | 2 |
| P48634     | Protein PRF1 | 1.15901715  | 2 | 2 | 2 | 228.7 | 9.45  | 36 | 2 |
| X6RBG4     | Uromodulin   | 3.62844702  | 2 | 2 | 2 | 75.6  | 5.87  | 42 | 2 |
| G3V3G9     | Uncharacter  | 3.86151798  | 2 | 2 | 1 | 84.7  | 5.12  | 18 | 2 |
| P36639     | 7,8-dihydr   | 6.09137056  | 1 | 1 | 1 | 22.5  | 5.27  | 57 | 1 |
| 000115     | Deoxyribon   | 3.05555556  | 1 | 1 | 1 | 39.6  | 8.05  | 41 | 1 |
| Q08499     | cAMP-speci   | 2.84301607  | 2 | 2 | 2 | 91.1  | 5.54  | 33 | 2 |
| Q14116     | Interleukin  | 8.80829016  | 2 | 2 | 2 | 22.3  | 4.67  | 0  | 2 |
| Q6IBN6     | CBX1 protei  | 5.94594595  | 1 | 2 | 1 | 21.4  | 4.93  | 55 | 1 |
| Q9UI26     | Importin-11  | 1.53846154  | 2 | 2 | 2 | 112.5 | 5.25  | 60 | 2 |
| P48509     | CD151 anti   | 6.71936759  | 2 | 2 | 2 | 28.3  | 7.47  | 54 | 2 |
| K7EM18     | Eukaryotic   | 13.2231405  | 1 | 1 | 1 | 13.6  | 7.9   | 32 | 1 |
| P62745     | Rho-relate   | 6.12244898  | 1 | 1 | 1 | 22.1  | 5.24  | 48 | 1 |
| J3KPP4     | Cisplatin r  | 5.31697342  | 2 | 2 | 2 | 58.2  | 9.92  | 28 | 2 |
| Q68DH5     | LMBR1 domai  | 1.58273381  | 1 | 1 | 1 | 81.1  | 7.5   | 44 | 1 |
| Q9Y2P8     | RNA 3'-tern  | 4.02144772  | 1 | 1 | 1 | 40.8  | 9.26  | 49 | 1 |
| B4DJV9     | cDNA FLJ60   | 9.12547529  | 2 | 2 | 2 | 28.3  | 7.64  | 40 | 2 |
| P53602     | Diphosphom   | 3.25        | 1 | 1 | 1 | 43.4  | 7.23  | 37 | 1 |
| Q9NUQ3     | Gamma-taxi   | 3.40909091  | 2 | 2 | 2 | 60.5  | 7.52  | 46 | 2 |
| Q8WUX1     | Sodium-co    | 2.11864407  | 1 | 1 | 1 | 51.4  | 8.21  | 46 | 1 |
| B4DIS3     | Dpy-30-like  | 9.16666667  | 1 | 1 | 1 | 13.9  | 7.5   | 62 | 1 |
| Q96Q11     | CCA tRNA m   | 3.91705069  | 2 | 2 | 2 | 50.1  | 8.1   | 61 | 2 |
| AOA140VKG4 | Testis tis   | 1.78217822  | 1 | 1 | 1 | 55.4  | 4.88  | 40 | 1 |
| Q4LE48     | STAG1 vari   | 1.49019608  | 2 | 2 | 1 | 146.2 | 5.66  | 34 | 2 |
| Q02127     | Dihydroorot  | 3.5443038   | 1 | 1 | 1 | 42.8  | 9.67  | 44 | 1 |
| Q96CS3     | FAS-associ   | 2.69662921  | 1 | 1 | 1 | 52.6  | 5.62  | 46 | 1 |
| J3QK89     | Calcium hon  | 2.69687163  | 2 | 2 | 2 | 104.9 | 9.19  | 21 | 2 |
| Q92538     | Golgi-speci  | 0.96826251  | 2 | 2 | 2 | 206.3 | 5.73  | 31 | 2 |
| P49902     | Cytosolic p  | 2.85204991  | 2 | 2 | 2 | 64.9  | 6.14  | 56 | 2 |
| F5GYQ1     | V-type prot  | 6.12244898  | 2 | 2 | 2 | 44.6  | 5.14  | 33 | 2 |
| J3KQL8     | Apolipoprot  | 2.44988864  | 1 | 1 | 1 | 48.9  | 6     | 41 | 1 |
| Q9Y333     | U6 snRNA-as  | 20          | 1 | 2 | 1 | 10.8  | 6.52  | 0  | 1 |
| Q96PU8     | Protein que  | 9.09090909  | 2 | 2 | 2 | 37.6  | 8.56  | 0  | 2 |
| Q9Y6M5     | Zinc trans   | 4.14201183  | 2 | 2 | 2 | 55.3  | 6.48  | 39 | 2 |
| P78346     | Ribonuclea   | 8.95522388  | 2 | 2 | 2 | 29.3  | 8.91  | 0  | 2 |
| P78310     | Coxsackiev   | 6.02739726  | 2 | 2 | 2 | 40    | 7.56  | 38 | 2 |
| B72268     | Single-str   | 9.43396226  | 1 | 1 | 1 | 18.5  | 10.1  | 43 | 1 |
| 095989     | Diphosphoi   | 13.372093   | 2 | 2 | 2 | 19.5  | 6.34  | 26 | 2 |
| Q7Z7K6     | Centromere   | 6.90909091  | 1 | 1 | 1 | 29.9  | 9.73  | 0  | 1 |
| P26885     | Peptidyl-pr  | 8.45070423  | 1 | 1 | 1 | 15.6  | 9.13  | 52 | 1 |
| Q9UBW8     | COP9 signa   | 4.36363636  | 1 | 1 | 1 | 30.3  | 8.22  | 44 | 1 |
| Q9UPN7     | Serine/thr   | 1.24858116  | 1 | 1 | 1 | 96.7  | 4.55  | 43 | 1 |
| Q9Y6A4     | Cilia- and   | 6.21761658  | 1 | 1 | 1 | 22.8  | 9.76  | 42 | 1 |
| Q9UKF6     | Cleavage ar  | 3.80116959  | 2 | 2 | 2 | 77.4  | 5.6   | 26 | 2 |
| Q96E11     | Ribosome-r   | 5.72519084  | 1 | 1 | 1 | 29.3  | 9.79  | 41 | 1 |
| Q7Z7L1     | Schlafen f   | 2.5527192   | 2 | 2 | 2 | 102.8 | 7.77  | 21 | 2 |
| Q92820     | Gamma-glut   | 4.08805031  | 1 | 1 | 1 | 35.9  | 7.11  | 42 | 1 |
| B2RC50     | cDNA, FLJ9   | 5.95744681  | 1 | 1 | 1 | 25.4  | 8.18  | 54 | 1 |
| Q15274     | Nicotinate   | -5.38720539 | 1 | 1 | 1 | 30.8  | 6.21  | 36 | 1 |
| Q9ULC4     | Malignant    | 110.4972376 | 1 | 1 | 1 | 20.5  | 8.82  | 0  | 1 |
| AOA140VJCS | Testicular   | 1.55844156  | 1 | 1 | 1 | 86.9  | 4.82  | 0  | 1 |
| Q9H9A5     | CCR4=NOT     | 1.34408602  | 1 | 1 | 1 | 82.3  | 7.78  | 47 | 1 |
| Q9POH9     | RER1 protei  | 8.87850467  | 1 | 1 | 1 | 24.8  | 9.63  | 0  | 1 |
| Q9BTE1     | Dynactin st  | 10.989011   | 2 | 2 | 2 | 20.1  | 8.02  | 56 | 2 |
| Q5U5J2     | CSNK2A1 pr   | 3.02267003  | 1 | 1 | 1 | 45.9  | 7.96  | 46 | 1 |
| P29317     | Ephrin type  | 2.15163934  | 2 | 2 | 2 | 108.2 | 6.23  | 34 | 2 |
| B2R761     | cDNA, FLJ9   | 3.65630713  | 2 | 2 | 2 | 59    | 7.05  | 21 | 2 |
| 060925     | Prefoldin    | :9.01639344 | 1 | 1 | 1 | 14.2  | 6.81  | 43 | 1 |
| F8VVA7     | Coatomer st  | 5.55555556  | 1 | 1 | 1 | 22.3  | 4.89  | 56 | 1 |
| Q9NUJ1     | Mycophenol   | 9.47712418  | 2 | 2 | 2 | 33.9  | 8.57  | 29 | 2 |
| Q7Z5K2     | Wings apar   | 1.09243697  | 1 | 1 | 1 | 132.9 | 5.44  | 37 | 1 |
| Q8N684     | Cleavage ar  | 2.33545648  | 1 | 1 | 1 | 52    | 8     | 56 | 1 |
| B3KM47     | cDNA FLJ10   | 2.2         | 2 | 2 | 2 | 111   | 5.45  | 26 | 2 |
| Q13451     | Peptidyl-p   | 4.37636761  | 2 | 2 | 2 | 51.2  | 5.9   | 35 | 2 |
| Q969E8     | Pre-rRNA-p   | 4.71204188  | 1 | 1 | 1 | 20.9  | 4.39  | 59 | 1 |
| Q05DF2     | SF3A2 prote  | 3.53430353  | 2 | 2 | 2 | 51.4  | 10.11 | 41 | 2 |
| Q7L4I2     | Arginine/sc  | 2.76497696  | 1 | 1 | 1 | 50.5  | 11.33 | 0  | 1 |
| P55039     | Development  | 5.76923077  | 2 | 2 | 2 | 40.7  | 8.88  | 31 | 2 |
| B2R6J3     | cDNA, FLJ9   | 8           | 2 | 2 | 2 | 27.3  | 8.6   | 40 | 2 |
| Q9HD34     | LYR motif-c  | 15.3846154  | 2 | 2 | 1 | 10.8  | 10.73 | 43 | 2 |

|            |                        |   |   |   |       |       |    |   |
|------------|------------------------|---|---|---|-------|-------|----|---|
| B3KQ21     | cDNA FLJ3242.84757119  | 2 | 2 | 2 | 70.2  | 7.46  | 39 | 2 |
| A0A087WZM5 | Peptidylprc10.0775194  | 1 | 1 | 1 | 14.9  | 9.52  | 45 | 1 |
| Q9ULT8     | E3 ubiquitin0.76628352 | 2 | 2 | 2 | 289.2 | 5.35  | 34 | 2 |
| A0A024QZG0 | Ring finger1.999001    | 1 | 1 | 1 | 113.6 | 6.29  | 44 | 1 |
| V9HW90     | Epididymis4.21455939   | 2 | 2 | 2 | 56.2  | 8.5   | 32 | 2 |
| O75323     | Protein Nip3.14685315  | 1 | 1 | 1 | 33.7  | 9.36  | 59 | 1 |
| Q9HD33     | 39S ribosom4.4         | 1 | 1 | 1 | 29.4  | 10.37 | 45 | 1 |
| O43159     | Ribosomal f3.50877193  | 1 | 1 | 1 | 50.7  | 9.42  | 45 | 1 |
| L7RSM2     | Mitogen-acti4.44444444 | 2 | 2 | 2 | 41.5  | 5.88  | 47 | 2 |
| Q6Y1H2     | Very-long-c4.72440945  | 1 | 1 | 1 | 28.4  | 9.55  | 42 | 1 |
| Q5HYL3     | Putative ur40.2777778  | 2 | 2 | 1 | 8     | 7.44  | 27 | 2 |
| MOR0K5     | Adhesion G1.56438026   | 1 | 1 | 1 | 91.3  | 7.03  | 42 | 1 |
| P62166     | Neuronal c12.1052632   | 2 | 2 | 2 | 21.9  | 4.83  | 26 | 2 |
| Q86TC9     | Myopalladir1.89393939  | 2 | 2 | 2 | 145.2 | 6.77  | 32 | 2 |
| P35249     | Replicatio3.58126722   | 1 | 1 | 1 | 39.7  | 8.02  | 39 | 1 |
| J3QR07     | YTH domain-2.44897959  | 2 | 2 | 2 | 85.5  | 6.23  | 41 | 2 |
| B3KY94     | CDP-diacyl4.21940928   | 1 | 1 | 1 | 25.9  | 8.22  | 41 | 1 |
| Q8NCG7     | Sn1-specifi2.97619048  | 2 | 2 | 2 | 73.7  | 6.55  | 32 | 2 |
| Q13228     | Selenium-bi2.11864407  | 1 | 2 | 1 | 52.4  | 6.37  | 31 | 1 |
| B4E0L0     | cDNA FLJ543.88127854   | 1 | 1 | 1 | 48.1  | 9.92  | 47 | 1 |
| B2R5Y4     | cDNA, FLJ923.23159785  | 2 | 2 | 2 | 65.6  | 6.64  | 29 | 2 |
| P63151     | Serine/thr4.92170022   | 2 | 2 | 2 | 51.7  | 6.2   | 25 | 2 |
| B2R8U9     | Caspase OS-2.22772277  | 1 | 1 | 1 | 45.1  | 5.91  | 51 | 1 |
| E7ENQ6     | Uncharacter4.02930403  | 1 | 1 | 1 | 30.1  | 6.9   | 45 | 1 |
| H7BYZ3     | Uncharacter3.62537764  | 1 | 1 | 1 | 36.9  | 8.34  | 42 | 1 |
| A0A024R371 | PRA1 family5.85106383  | 1 | 2 | 1 | 21.6  | 9.77  | 77 | 1 |
| P78316     | Nucleolar p3.03383897  | 2 | 2 | 2 | 97.6  | 7.58  | 32 | 2 |
| P53582     | Methionine2.84974093   | 1 | 1 | 1 | 43.2  | 7.17  | 46 | 1 |
| A0A024R333 | Transmembr4.79233227   | 2 | 2 | 2 | 35.1  | 7.69  | 46 | 2 |
| O00217     | NADH dehyd10.952381    | 2 | 2 | 2 | 23.7  | 6.34  | 0  | 2 |
| Q8N983     | 39S ribosom10.6976744  | 2 | 2 | 2 | 23.4  | 8.65  | 15 | 2 |
| Q96C86     | m7GpppX dir8.60534125  | 2 | 2 | 2 | 38.6  | 6.38  | 24 | 2 |
| E7ERK9     | Translatior1.83823529  | 1 | 1 | 1 | 59.7  | 9.42  | 41 | 1 |
| Q15800     | Methylsterc4.778157    | 1 | 1 | 1 | 35.2  | 7.23  | 49 | 1 |
| B3KNB9     | cDNA FLJ1413.07017544  | 2 | 2 | 2 | 75.4  | 6.61  | 31 | 2 |
| Q14019     | Coactosin-111.2676056  | 2 | 2 | 2 | 15.9  | 5.67  | 43 | 2 |
| P51151     | Ras-relatec5.47263682  | 1 | 1 | 1 | 22.8  | 5.47  | 53 | 1 |
| A0A024R001 | Transmembr8.92857143   | 1 | 1 | 1 | 11.6  | 9.88  | 0  | 1 |
| Q13433     | Zinc trans1.58940397   | 2 | 2 | 2 | 85    | 6.95  | 0  | 2 |
| O95881     | Thioredoxir5.23255814  | 1 | 1 | 1 | 19.2  | 5.4   | 49 | 1 |
| Q01970     | l-phosphat1.70178282   | 2 | 2 | 2 | 138.7 | 5.9   | 38 | 2 |
| Q10589     | Bone marrow5.55555556  | 1 | 1 | 1 | 19.8  | 5.6   | 42 | 1 |
| P82933     | 28S ribosom5.55555556  | 2 | 2 | 2 | 45.8  | 9.51  | 37 | 2 |
| A8K7Z3     | cDNA FLJ772.37812128   | 2 | 2 | 2 | 95.9  | 5.07  | 0  | 2 |
| HOY5K5     | Endoplasmic4.0302267   | 2 | 2 | 2 | 44.6  | 6.47  | 47 | 2 |
| H7BY58     | Protein-L-i3.84615385  | 1 | 1 | 1 | 30.3  | 6.73  | 53 | 1 |
| A0A0AOMRK6 | Metaxin I, 4.93562232  | 2 | 2 | 2 | 51.4  | 9.79  | 40 | 2 |
| B2RD09     | cDNA, FLJ961.7167382   | 1 | 1 | 1 | 50.4  | 9.03  | 69 | 1 |
| Q76LA1     | CSTB protei36.7346939  | 2 | 2 | 2 | 11.1  | 7.56  | 34 | 2 |
| B2R932     | cDNA, FLJ927.56756757  | 1 | 1 | 1 | 18.9  | 4.82  | 45 | 1 |
| Q9BSH4     | Translatior6.73400673  | 1 | 1 | 1 | 32.5  | 8.13  | 40 | 1 |
| A0A0AOMQR2 | Protein RTF7.14285714  | 2 | 2 | 2 | 37.5  | 8.44  | 23 | 2 |
| B4DN86     | cDNA FLJ563.49206349   | 2 | 2 | 2 | 101.4 | 5     | 0  | 2 |
| J7MDF2     | CCDC6-RET11.78926441   | 1 | 1 | 1 | 55.5  | 6.14  | 33 | 1 |
| Q9UKM7     | Endoplasmic1.00143062  | 1 | 2 | 1 | 79.5  | 7.72  | 45 | 1 |
| Q53EY9     | F-box only2.48138958   | 1 | 1 | 1 | 44.5  | 7.03  | 37 | 1 |
| Q8N806     | Putative E2.35294118   | 1 | 1 | 1 | 48    | 4.81  | 43 | 1 |
| O43660     | Pleiotropic4.6692607   | 2 | 2 | 2 | 57.2  | 9.17  | 0  | 2 |
| Q9H2J7     | Sodium-depe4.10958904  | 2 | 2 | 2 | 81.8  | 5.19  | 20 | 2 |
| Q9BXW7     | Cat eye syr2.12765957  | 1 | 1 | 1 | 46.3  | 8.13  | 47 | 1 |
| J9JIE6     | Calcium loe5.85774059  | 1 | 2 | 1 | 27.1  | 10.26 | 55 | 1 |
| Q9H7D7     | WD repeat-c1.5128593   | 1 | 2 | 1 | 72.1  | 6.16  | 35 | 1 |
| Q7Z4X2     | Neuronal pi14.556962   | 1 | 1 | 1 | 17.9  | 5.43  | 0  | 1 |
| Q9Y4X5     | E3 ubiquiti1.97486535  | 1 | 1 | 1 | 64.1  | 5.08  | 34 | 1 |
| P21912     | Succinate c6.07142857  | 2 | 2 | 2 | 31.6  | 8.76  | 35 | 2 |
| Q9Y3D6     | Mitochondri8.55263158  | 1 | 1 | 1 | 16.9  | 8.79  | 34 | 1 |
| Q15061     | WD repeat-c1.62481536  | 1 | 1 | 1 | 74.8  | 5.57  | 41 | 1 |
| P10515     | Dihydrolip2.47295209   | 2 | 2 | 2 | 69    | 7.84  | 0  | 2 |
| Q7GXZ5     | NADH-ubiqui13.0434783  | 1 | 1 | 1 | 13.2  | 4.44  | 46 | 1 |
| Q9HCG8     | Pre-mRNA-sj1.21145374  | 1 | 1 | 1 | 105.4 | 7.03  | 53 | 1 |
| O75569     | Interferon-4.79233227  | 1 | 1 | 1 | 34.4  | 8.41  | 37 | 1 |
| X5D2I6     | G protein-c2.62582057  | 1 | 1 | 1 | 53.1  | 9.28  | 38 | 1 |
| Q9H490     | Phosphatid2.52873563   | 1 | 1 | 1 | 50    | 7.72  | 50 | 1 |

|            |                       |   |   |   |       |       |    |   |
|------------|-----------------------|---|---|---|-------|-------|----|---|
| Q9H9T3     | Elongator c1.82815356 | 1 | 1 | 1 | 62.2  | 8.88  | 52 | 1 |
| P48651     | Phosphatidy 2.1141649 | 1 | 1 | 1 | 55.5  | 8.43  | 49 | 1 |
| X5D299     | Aldehyde de3.46715328 | 2 | 2 | 2 | 58.6  | 8.09  | 0  | 2 |
| B2R642     | cDNA, FLJ91.39318885  | 1 | 1 | 1 | 71.6  | 5.76  | 47 | 1 |
| Q96CN7     | Isochorism3.69127517  | 1 | 1 | 1 | 32.2  | 7.39  | 36 | 1 |
| B4DMM7     | cDNA FLJ591.91972077  | 1 | 1 | 1 | 63.3  | 5.2   | 51 | 1 |
| AOA024QYZO | Sec61 gamma17.6470588 | 1 | 1 | 1 | 7.7   | 9.99  | 42 | 1 |
| B2RDR4     | cDNA, FLJ91.5.4631829 | 2 | 2 | 2 | 47.9  | 7.68  | 28 | 2 |
| P03923     | NADH-ubiqui8.04597701 | 1 | 1 | 1 | 18.6  | 4.22  | 48 | 1 |
| Q9H8Y5     | Ankyrin re1.3415978   | 1 | 1 | 1 | 80.9  | 8.41  | 0  | 1 |
| Q9GZS3     | WD repeat-c2.62295082 | 1 | 1 | 1 | 33.6  | 5.47  | 44 | 1 |
| P28065     | Proteasome 4.56621005 | 1 | 1 | 1 | 23.3  | 5.03  | 54 | 1 |
| P47712     | Cytosolic p2.67022697 | 2 | 2 | 2 | 85.2  | 5.38  | 32 | 2 |
| 043252     | Bifunction3.84615385  | 2 | 2 | 2 | 70.8  | 6.86  | 19 | 2 |
| Q59GX2     | Solute car1.93423598  | 1 | 1 | 1 | 57    | 9.47  | 42 | 1 |
| Q687X5     | Metallored3.92156863  | 2 | 2 | 2 | 51.9  | 9.29  | 0  | 2 |
| 014949     | Cytochrome 21.9512195 | 2 | 2 | 2 | 9.9   | 10.08 | 39 | 2 |
| P35658     | Nuclear poi0.86124402 | 2 | 2 | 2 | 213.5 | 7.47  | 30 | 2 |
| A8K4B4     | cDNA FLJ781.2.9478458 | 1 | 1 | 1 | 49.4  | 9.89  | 44 | 1 |
| Q1HDL3     | HBeAg-bind1.34448161  | 1 | 1 | 1 | 32    | 7.62  | 63 | 1 |
| Q8NI60     | Atypical kil.70015456 | 1 | 1 | 1 | 71.9  | 6.99  | 51 | 1 |
| P62330     | ADP-ribosyl6.28571429 | 1 | 1 | 1 | 20.1  | 8.95  | 35 | 1 |
| B3KQL8     | Alpha-1,3-1.66159696  | 1 | 1 | 1 | 60.1  | 9.14  | 42 | 1 |
| 015173     | Membrane-a7.62331839  | 2 | 2 | 1 | 23.8  | 4.88  | 26 | 2 |
| AOA024R806 | Uncharacter10.6557377 | 1 | 1 | 1 | 13.1  | 7.88  | 0  | 1 |
| 000743     | Serine/thre6.2295082  | 2 | 2 | 2 | 35.1  | 5.69  | 34 | 2 |
| AOA024RDJ1 | DC2 proteir8.05369128 | 1 | 1 | 1 | 16.8  | 9.13  | 50 | 1 |
| Q9H9A6     | Leucine-ric1.66112957 | 1 | 1 | 1 | 68.2  | 6.43  | 26 | 1 |
| Q969U7     | Proteasome 4.54545455 | 1 | 1 | 1 | 29.4  | 6.98  | 28 | 1 |
| Q86TI2     | Dipeptidyl 0.92699884 | 1 | 1 | 1 | 98.2  | 6.46  | 54 | 1 |
| Q17RY6     | Lymphocyte 6.06060606 | 1 | 1 | 1 | 18.7  | 7.43  | 43 | 1 |
| Q7Z7K0     | COX assemb19.43396226 | 1 | 1 | 1 | 12.5  | 8.63  | 45 | 1 |
| Q69YJ7     | Putative ur1.04821803 | 1 | 1 | 1 | 100.1 | 8.91  | 40 | 1 |
| Q96EB6     | NAD-depend1.47255689  | 1 | 1 | 1 | 81.6  | 4.67  | 40 | 1 |
| Q32Q14     | NDUFA7 prot14.8760331 | 1 | 1 | 1 | 13.5  | 10.4  | 0  | 1 |
| Q81Y37     | Probable A10.77787381 | 1 | 1 | 1 | 129.5 | 8.1   | 36 | 1 |
| P49959     | Double-str1.41242938  | 1 | 1 | 1 | 80.5  | 5.9   | 46 | 1 |
| Q9NW82     | WD repeat-c1.98776758 | 1 | 1 | 1 | 73.2  | 6.33  | 39 | 1 |
| G3V4P8     | Glia matur7.33333333  | 1 | 1 | 1 | 17.5  | 5.31  | 34 | 1 |
| AOA024R216 | Hepatoma-de3.9408867  | 1 | 1 | 1 | 22.6  | 7.99  | 40 | 1 |
| Q9Y2A7     | Nck-associ2.21631206  | 2 | 2 | 2 | 128.7 | 6.62  | 27 | 2 |
| Q9H6Z4     | Ran-binding3.7037037  | 2 | 2 | 2 | 60.2  | 4.78  | 37 | 2 |
| B7ZLW0     | LPP proteir2.45098039 | 1 | 1 | 1 | 65.7  | 7.37  | 32 | 1 |
| Q9UNN5     | FAS-associ2.61538462  | 2 | 2 | 2 | 73.9  | 4.88  | 29 | 2 |
| P53634     | Dipeptidyl 4.10367171 | 2 | 2 | 2 | 51.8  | 6.99  | 27 | 2 |
| Q9UJW0     | Dynactin su5.2173913  | 2 | 2 | 2 | 52.3  | 7.34  | 22 | 2 |
| P30622     | CAP-Gly don1.59944367 | 2 | 2 | 2 | 162.1 | 5.36  | 0  | 2 |
| AOA024QZW2 | Nucleolar r6.61478599 | 2 | 2 | 2 | 29.4  | 9.67  | 36 | 2 |
| C9J7E5     | Transportir1.77638454 | 2 | 2 | 2 | 108   | 5.71  | 41 | 2 |
| Q6ZVX7     | F-box only 4          | 1 | 1 | 1 | 30.8  | 6.62  | 31 | 1 |
| B7ZC38     | Endophilin-3.25       | 1 | 1 | 1 | 44.3  | 5.82  | 25 | 1 |
| AOA024R978 | Chromosome 2.26293103 | 2 | 2 | 2 | 103.1 | 4.78  | 0  | 2 |
| C9JEJ2     | Choline-phc3.15789474 | 1 | 1 | 1 | 43.2  | 8.5   | 32 | 1 |
| A6NMQ1     | DNA polymer0.68119891 | 1 | 1 | 1 | 166.4 | 5.81  | 45 | 1 |
| Q6NXE6     | Armadillo r1.79640719 | 1 | 1 | 1 | 54.1  | 6.24  | 42 | 1 |
| Q8N5M1     | ATP synthas4.15224913 | 1 | 1 | 1 | 32.8  | 7.09  | 33 | 1 |
| Q9NQW6     | Anillin OS-1.51245552 | 2 | 2 | 2 | 124.1 | 8.07  | 31 | 2 |
| Q9NRW7     | Vacuolar pi2.10526316 | 1 | 1 | 1 | 65    | 8.24  | 45 | 1 |
| P36551     | Oxygen-depe3.74449339 | 1 | 1 | 1 | 50.1  | 8.25  | 0  | 1 |
| Q7Z4Q2     | HEAT repeat2.20588235 | 1 | 1 | 1 | 74.5  | 5.11  | 40 | 1 |
| Q9UKL0     | REST corep1.29896907  | 1 | 1 | 1 | 53.3  | 7.03  | 42 | 1 |
| F5GXJ1     | NADH dehyd3.81355932  | 1 | 1 | 1 | 25.4  | 9.89  | 44 | 1 |
| 095721     | Synaptosom4.26356589  | 1 | 1 | 1 | 29    | 5.81  | 34 | 1 |
| AOA024R074 | Synaptobrev4.61538462 | 1 | 1 | 1 | 30.2  | 8.37  | 38 | 1 |
| AOA0J9YWLO | Absent in n1.17315814 | 2 | 2 | 2 | 231.6 | 5.81  | 29 | 2 |
| A8K2G0     | Secretory c3.84615385 | 1 | 1 | 1 | 37.8  | 7.11  | 0  | 1 |
| 043819     | Protein SCC 3.7593985 | 1 | 1 | 1 | 29.8  | 8.85  | 41 | 1 |
| Q9BUR5     | MICOS comp17.57575758 | 1 | 1 | 1 | 22.3  | 9.13  | 26 | 1 |
| Q59ED5     | Tetraspanir2.80701754 | 1 | 1 | 1 | 31.7  | 8.37  | 52 | 1 |
| Q9BV20     | Methylthio2.7100271   | 1 | 1 | 1 | 39.1  | 6.3   | 36 | 1 |
| Q9UGJ0     | 5'-AMP-acti1.75746924 | 1 | 1 | 1 | 63    | 9.35  | 36 | 1 |
| P32321     | Deoxycytidy10.1123596 | 1 | 1 | 1 | 20    | 7.56  | 27 | 1 |
| Q8TEA8     | D-tyrosyl-t14.8325359 | 2 | 2 | 2 | 23.4  | 8.24  | 22 | 2 |

|            |             |              |   |   |   |       |       |    |   |
|------------|-------------|--------------|---|---|---|-------|-------|----|---|
| Q96KG9     | N-terminal  | 3.09405941   | 2 | 2 | 2 | 89.6  | 6.3   | 26 | 2 |
| Q9UK45     | U6 snRNA-as | 7.76699029   | 1 | 1 | 1 | 11.6  | 5.27  | 52 | 1 |
| Q9H488     | GDP-fucose  | 2.31958763   | 1 | 1 | 1 | 43.9  | 8.53  | 30 | 1 |
| P53803     | DNA-directe | 12.0689655   | 1 | 1 | 1 | 7     | 9.06  | 65 | 1 |
| Q8IV48     | 3'-5' exori | 4.29799427   | 1 | 1 | 1 | 40    | 6.7   | 28 | 1 |
| B5BU81     | YKT6 v-SNAF | 4.54545455   | 1 | 1 | 1 | 22.4  | 6.92  | 41 | 1 |
| POC7P4     | Putative cy | 3.18021201   | 1 | 1 | 1 | 30.8  | 8.87  | 48 | 1 |
| Q9HD45     | Transmembr  | 1.69779287   | 1 | 1 | 1 | 67.8  | 7.21  | 41 | 1 |
| A0A024R473 | Mitochondri | 3.01204819   | 1 | 1 | 1 | 37.5  | 8.4   | 38 | 1 |
| F1JVV5     | EWSR1/ATF1  | 1.67597765   | 1 | 1 | 1 | 57    | 8.57  | 50 | 1 |
| P49406     | 39S ribosom | 3.76712329   | 1 | 1 | 1 | 33.5  | 9.5   | 43 | 1 |
| P42345     | Serine/thre | 0.39231071   | 1 | 1 | 1 | 288.7 | 7.17  | 31 | 1 |
| A0A0G2JK23 | Large proli | 1.06007067   | 1 | 1 | 1 | 119.3 | 5.6   | 38 | 1 |
| P14735     | Insulin-de  | 1.86457311   | 2 | 2 | 2 | 117.9 | 6.61  | 35 | 2 |
| B2RAR2     | cDNA, FLJ9  | 2.18446602   | 1 | 1 | 1 | 46.6  | 7.18  | 28 | 1 |
| Q9H2J4     | Phosducin-1 | 5.43933054   | 1 | 1 | 1 | 27.6  | 4.84  | 38 | 1 |
| Q14331     | Protein FR  | 5.03875969   | 1 | 1 | 1 | 29.2  | 9.01  | 31 | 1 |
| Q96FX8     | p53 apopto  | 3.62694301   | 1 | 1 | 1 | 21.4  | 7.03  | 32 | 1 |
| Q96FZ2     | Embryonic   | 4.23728814   | 1 | 1 | 1 | 40.5  | 8.15  | 37 | 1 |
| Q9GZR7     | ATP-depend  | 0.93131548   | 1 | 1 | 1 | 96.3  | 9.06  | 43 | 1 |
| Q96KP4     | Cytosolic   | 2.31578947   | 1 | 1 | 1 | 52.8  | 5.97  | 45 | 1 |
| Q9BYN8     | 28S ribosom | 4.3902439    | 1 | 1 | 1 | 24.2  | 10.39 | 47 | 1 |
| E7EPT4     | NADH dehyd  | 5.15873016   | 1 | 1 | 1 | 27.9  | 8     | 31 | 1 |
| P61165     | Transmembr  | 10.1265823   | 1 | 1 | 1 | 9.1   | 5.83  | 34 | 1 |
| B2RBM8     | cDNA, FLJ9  | 2.63157895   | 2 | 2 | 2 | 123.5 | 7.42  | 0  | 2 |
| Q8NBF2     | NHL repeat  | -1.92837466  | 1 | 1 | 1 | 79.4  | 5.55  | 31 | 1 |
| P52788     | Spermine s  | 2.45901639   | 1 | 1 | 1 | 41.2  | 5.02  | 56 | 1 |
| Q9BT22     | Chitobiosyl | 4.95689655   | 2 | 2 | 2 | 52.5  | 7.23  | 20 | 2 |
| P36405     | ADP-ribosyl | 5.49450549   | 1 | 1 | 1 | 20.4  | 7.24  | 45 | 1 |
| F5H0C4     | Proteasomal | 2.79898219   | 1 | 1 | 1 | 42.7  | 6.16  | 43 | 1 |
| Q14011     | Cold-induci | 6.39534884   | 1 | 1 | 1 | 18.6  | 9.51  | 32 | 1 |
| B2RE40     | cDNA, FLJ9  | 5.31914894   | 1 | 1 | 1 | 31.5  | 4.59  | 0  | 1 |
| Q53Y06     | ATPase, H+  | 4.86725664   | 1 | 1 | 1 | 26.1  | 8     | 50 | 1 |
| Q9Y606     | tRNA pseud  | 2.34192037   | 1 | 1 | 1 | 47.4  | 8.41  | 0  | 1 |
| Q8IXB1     | DnaJ homol  | 1.26103405   | 1 | 1 | 1 | 91    | 7.18  | 47 | 1 |
| A0A024R2L1 | Testicular  | 2.21565731   | 1 | 1 | 1 | 76.2  | 7.03  | 36 | 1 |
| Q9BWU0     | Kanadaptin  | 1.13065327   | 1 | 1 | 1 | 88.8  | 5.19  | 40 | 1 |
| A0A024R0H2 | Mitochondri | 6.52173913   | 1 | 1 | 1 | 15.2  | 10.29 | 39 | 1 |
| Q9UI30     | Multifuncti | 10.4         | 1 | 1 | 1 | 14.2  | 5.26  | 42 | 1 |
| A0A0U1RRM6 | Protein en  | 2.74314214   | 1 | 1 | 1 | 87.3  | 7.77  | 20 | 1 |
| Q9UI09     | NADH dehyd  | 8.27586207   | 1 | 1 | 1 | 17.1  | 9.63  | 27 | 1 |
| Q86WBO     | Nuclear-int | 5.77689243   | 2 | 2 | 2 | 55.2  | 5.62  | 0  | 2 |
| P08962     | CD63 antige | 4.20168067   | 1 | 1 | 1 | 25.6  | 7.81  | 0  | 1 |
| Q6P587     | Acylpyruva  | 6.25         | 1 | 1 | 1 | 24.8  | 7.39  | 20 | 1 |
| HOY362     | Zinc trans  | 11.4942529   | 1 | 1 | 1 | 9.9   | 7.28  | 41 | 1 |
| Q9UEE9     | Craniofaci  | 3.34448161   | 1 | 1 | 1 | 33.6  | 4.81  | 0  | 1 |
| Q8WUV3     | PRMT3 prote | 2.37226277   | 1 | 1 | 1 | 61.9  | 7.42  | 33 | 1 |
| Q16563     | Synaptophy  | 4.24710425   | 1 | 1 | 1 | 28.5  | 8.43  | 37 | 1 |
| Q9NX47     | E3 ubiquiti | 5.75539568   | 1 | 1 | 1 | 31.2  | 8.7   | 17 | 1 |
| Q08623     | Pseudouridi | 4.38596491   | 1 | 1 | 1 | 25.2  | 5.31  | 41 | 1 |
| Q8IVS2     | Malonyl-Co  | 2.82051282   | 1 | 1 | 1 | 42.9  | 8.72  | 37 | 1 |
| P23434     | Glycine cle | 5.78034682   | 1 | 1 | 1 | 18.9  | 4.88  | 37 | 1 |
| P17813     | Endoglin    | 0.2.12765957 | 1 | 1 | 1 | 70.5  | 6.61  | 38 | 1 |
| Q9P013     | Spliceosom  | 4.80349345   | 1 | 1 | 1 | 26.6  | 5.71  | 25 | 1 |
| A0A024R9M9 | Calcium bir | 6.15384615   | 1 | 1 | 1 | 22.4  | 5.1   | 36 | 1 |
| Q9Y3A6     | Transmembr  | 5.24017467   | 1 | 1 | 1 | 26    | 4.84  | 27 | 1 |
| Q9COC2     | 182 kDa tar | 0.8097166    | 1 | 1 | 1 | 181.7 | 4.86  | 28 | 1 |
| O95707     | Ribonuclea  | 8.18181818   | 1 | 1 | 1 | 25.4  | 10.07 | 0  | 1 |
| P62875     | DNA-directe | 13.4328358   | 1 | 1 | 1 | 7.6   | 7.77  | 47 | 1 |
| B2R4G1     | cDNA, FLJ9  | 19.3548387   | 1 | 1 | 1 | 10.1  | 9.52  | 0  | 1 |
| A0A024R6D1 | NIMA (Neve  | 0.91930541   | 1 | 1 | 1 | 107.1 | 5.73  | 36 | 1 |
| B4DP80     | NAD(P)H-hy  | 3.90879479   | 1 | 1 | 1 | 33.6  | 8.73  | 33 | 1 |
| Q7L592     | Protein ar  | 2.9478458    | 1 | 1 | 1 | 49.2  | 8.34  | 0  | 1 |
| O60508     | Pre-mRNA-p  | 2.07253886   | 1 | 1 | 1 | 65.5  | 7.06  | 0  | 1 |
| Q86WQ0     | Nuclear rec | 8.63309353   | 1 | 1 | 1 | 15.9  | 6.16  | 0  | 1 |
| Q9GZNS     | UPF0687 pr  | 8.04597701   | 1 | 1 | 1 | 19.3  | 6.84  | 0  | 1 |
| F5H1U9     | Multiple P  | I0.57581574  | 1 | 1 | 1 | 223   | 5.06  | 0  | 1 |
| Q9UH65     | Switch-ass  | 1.70940171   | 1 | 1 | 1 | 69    | 5.87  | 36 | 1 |
| Q9UJA5     | tRNA (adeni | 2.01207243   | 1 | 1 | 1 | 55.8  | 7.55  | 39 | 1 |
| Q92506     | Estradiol   | 15.74712644  | 1 | 1 | 1 | 27    | 6.54  | 0  | 1 |
| Q15363     | Transmembr  | 4.47761194   | 1 | 1 | 1 | 22.7  | 5.17  | 32 | 1 |
| P81605     | Dermcidin   | C10          | 1 | 1 | 1 | 11.3  | 6.54  | 36 | 1 |
| A0A0C4DFN1 | Mitofusin-1 | 11.34952767  | 1 | 1 | 1 | 84.1  | 6.33  | 29 | 1 |

|            |                        |   |   |   |       |       |    |   |
|------------|------------------------|---|---|---|-------|-------|----|---|
| Q9NRN7     | L-aminoadip2.58899676  | 1 | 1 | 1 | 35.8  | 6.8   | 50 | 1 |
| Q7Z4V5     | Hepatoma-de2.23546945  | 1 | 1 | 1 | 74.3  | 7.49  | 0  | 1 |
| Q53YPO     | PreS1 bindi2.30125523  | 1 | 1 | 1 | 54.4  | 10.36 | 28 | 1 |
| 043688     | Phospholipi3.47222222  | 1 | 1 | 1 | 32.6  | 8.35  | 0  | 1 |
| P28290     | Sperm-specio.95313741  | 1 | 1 | 1 | 138.3 | 5.19  | 0  | 1 |
| Q96CU9     | FAD-depende2.26337449  | 1 | 1 | 1 | 53.8  | 7.78  | 31 | 1 |
| B4DE38     | cDNA FLJ54f3.13479624  | 1 | 1 | 1 | 36.5  | 10.58 | 32 | 1 |
| B2RAU5     | Sorting ne;2.35294118  | 1 | 1 | 1 | 66.5  | 5.66  | 28 | 1 |
| Q8IXM3     | 39S ribosom7.29927007  | 1 | 1 | 1 | 15.4  | 9.57  | 25 | 1 |
| MOR1Y2     | ER lumen pr 5          | 1 | 1 | 1 | 24.8  | 7.87  | 40 | 1 |
| Q14139     | Ubiquitin c1.31332083  | 1 | 1 | 1 | 122.5 | 5.24  | 0  | 1 |
| Q96GL3     | IRF3 protei3.09734513  | 1 | 1 | 1 | 49.1  | 6.52  | 0  | 1 |
| Q9UNI6     | Dual specii2.64705882  | 1 | 1 | 1 | 37.7  | 6.84  | 48 | 1 |
| Q9UKG1     | DCC-interac1.97461213  | 1 | 1 | 1 | 79.6  | 5.41  | 27 | 1 |
| 000154     | Cytosolic e;2.89473684 | 1 | 1 | 1 | 41.8  | 8.54  | 34 | 1 |
| P13473     | Lysosome-a;1.95121951  | 1 | 1 | 1 | 44.9  | 5.63  | 50 | 1 |
| AOA0A6YYL2 | Sulfotransf2.65780731  | 1 | 1 | 1 | 34.8  | 5.83  | 35 | 1 |
| AOA024QZY5 | PRP4 pre-mf1.09235353  | 1 | 1 | 1 | 116.9 | 10.26 | 0  | 1 |
| P61599     | N-alpha-acc5.05617978  | 1 | 1 | 1 | 20.4  | 5.03  | 0  | 1 |
| Q9HCY8     | Protein S1(10.5769231  | 1 | 1 | 1 | 11.7  | 5.24  | 30 | 1 |
| 014493     | Claudin-4 (5.26315789  | 1 | 1 | 1 | 22.1  | 8.05  | 0  | 1 |
| P46937     | Transcripti2.18253968  | 1 | 1 | 1 | 54.4  | 5.17  | 31 | 1 |
| B3KPZ2     | cDNA FLJ32c2.65251989  | 1 | 1 | 1 | 41.9  | 9.16  | 38 | 1 |
| 043493     | Trans-Golgi2.91666667  | 1 | 1 | 1 | 51.1  | 5.73  | 0  | 1 |
| Q6GMV2     | SET and MY2.63157895   | 1 | 1 | 1 | 47.3  | 5.05  | 27 | 1 |
| Q6WKZ4     | Rab11 fami11.01325019  | 1 | 1 | 1 | 137.1 | 5.43  | 36 | 1 |
| P51580     | Thiopurine 4.89795918  | 1 | 1 | 1 | 28.2  | 6.23  | 43 | 1 |
| AOA024R2M7 | Oxidative-e;2.08728653 | 1 | 1 | 1 | 58    | 6.43  | 34 | 1 |
| AOA024R7L2 | HSPC142 prc6.99088146  | 1 | 1 | 1 | 36.5  | 4.64  | 23 | 1 |
| AOA0D9SGE8 | PHD finger 4.91803279  | 1 | 1 | 1 | 41.3  | 8.68  | 0  | 1 |
| B4DJY5     | cDNA FLJ61f2.82258065  | 1 | 1 | 1 | 27.1  | 7.71  | 47 | 1 |
| HOY2M6     | Chloride cl 1.2208657  | 1 | 1 | 1 | 97.2  | 8.27  | 0  | 1 |
| Q9NTM9     | Copper home 4.3956044  | 1 | 1 | 1 | 29.3  | 8.18  | 0  | 1 |
| Q9POJ7     | E3 ubiquiti2.88713911  | 1 | 1 | 1 | 41.9  | 5.66  | 0  | 1 |
| Q9BV68     | E3 ubiquiti4.29447853  | 1 | 1 | 1 | 35.6  | 5.72  | 42 | 1 |
| Q96K76     | Ubiquitin c 0.8        | 1 | 1 | 1 | 157.2 | 5.08  | 38 | 1 |
| Q17RC7     | Exocyst con1.10803324  | 1 | 1 | 1 | 79.8  | 6.32  | 44 | 1 |
| Q8TBQ9     | Protein kis 12.5       | 1 | 1 | 1 | 8.1   | 8.95  | 42 | 1 |
| P10909     | Clusterin (3.56347439  | 1 | 1 | 1 | 52.5  | 6.27  | 31 | 1 |
| A6NDU8     | UPF0600 prc3.06122449  | 1 | 1 | 1 | 33.6  | 5.26  | 45 | 1 |
| AOA0S2Z5E9 | CFW19-like 1.85873606  | 1 | 1 | 1 | 60.6  | 7.24  | 31 | 1 |
| Q96DA6     | Mitochondri1.0689655   | 1 | 1 | 1 | 12.5  | 10.1  | 37 | 1 |
| X6R4W8     | BUB3-inter;2.61569416  | 1 | 1 | 1 | 52.6  | 8.47  | 23 | 1 |
| Q9COC9     | (E3-indeper0.77399381  | 1 | 1 | 1 | 141.2 | 5.12  | 39 | 1 |
| Q9HCC0     | Methylcrotc2.30905861  | 1 | 1 | 1 | 61.3  | 7.68  | 43 | 1 |
| Q9UQ13     | Leucine-ric2.23367698  | 1 | 1 | 1 | 64.8  | 8.46  | 33 | 1 |
| Q8N9T8     | Protein KR11.99146515  | 1 | 1 | 1 | 82.5  | 5.14  | 35 | 1 |
| AOA024RDV7 | Importin st 1.9193858  | 1 | 1 | 1 | 57.8  | 4.94  | 28 | 1 |
| B3KME2     | cDNA FLJ101f.99501247  | 1 | 1 | 1 | 46.5  | 5.85  | 0  | 1 |
| Q9Y5K6     | CD2-associ;1.56494523  | 1 | 1 | 1 | 71.4  | 6.4   | 39 | 1 |
| Q9UJX2     | Cell divisi1.3400335   | 1 | 1 | 1 | 68.8  | 7.02  | 42 | 1 |
| Q6I9Y2     | THO comple;4.90196078  | 1 | 1 | 1 | 23.7  | 5.67  | 37 | 1 |
| AOA096LPI6 | Uncharacter;3.58422939 | 1 | 1 | 1 | 30.5  | 7.87  | 36 | 1 |
| Q9NUI1     | Peroxisoma14.10958904  | 1 | 1 | 1 | 30.8  | 9.22  | 32 | 1 |
| Q9HC06     | Cd002 prote2.06718346  | 1 | 1 | 1 | 43.5  | 5.77  | 48 | 1 |
| HOY368     | Dolichol-pl3.72881356  | 1 | 1 | 1 | 33.3  | 9.14  | 22 | 1 |
| Q6LAP8     | Mitochondri3.77358491  | 1 | 1 | 1 | 34.8  | 9.89  | 22 | 1 |
| AOA0J9YXC7 | LIM and ser3.01507538  | 1 | 1 | 1 | 45.7  | 7.88  | 0  | 1 |
| Q14151     | Scaffold at1.04931794  | 1 | 1 | 1 | 107.4 | 6.16  | 14 | 1 |
| Q59G98     | TIA1 protei2.5862069   | 1 | 1 | 1 | 51.3  | 7.83  | 30 | 1 |
| B2RAH7     | cDNA, FLJ9c1.83098592  | 1 | 1 | 1 | 80.7  | 5.86  | 0  | 1 |
| Q9H814     | Phosphoryl;4.06091371  | 1 | 1 | 1 | 44.4  | 5.4   | 0  | 1 |
| Q96I36     | Cytochrome 14.0350877  | 1 | 1 | 1 | 6.6   | 9.55  | 45 | 1 |
| Q5J TZ9    | Alanine--tf1.11675127  | 1 | 1 | 1 | 107.3 | 6.27  | 37 | 1 |
| Q15075     | Early endoc0.77958894  | 1 | 1 | 1 | 162.4 | 5.68  | 0  | 1 |
| AOA024RC67 | Protein reg1.77419355  | 1 | 1 | 1 | 71.6  | 6.57  | 0  | 1 |
| B2R6D8     | CDC42 effec5.33707865  | 1 | 1 | 1 | 38    | 5.19  | 0  | 1 |
| P17706     | Tyrosine-pt2.65060241  | 1 | 1 | 1 | 48.4  | 8.29  | 39 | 1 |
| V9HW48     | SH3 domain-11.4035088  | 1 | 1 | 1 | 12.8  | 5.25  | 24 | 1 |
| Q5VTL8     | Pre-mRNA-s;7.50915751  | 1 | 1 | 1 | 64.4  | 10.54 | 0  | 1 |
| AOA024R2T5 | CUB domain1.19617225   | 1 | 1 | 1 | 92.8  | 8.03  | 0  | 1 |
| Q5JRA6     | Melanoma ir 0.681699   | 1 | 1 | 1 | 213.6 | 4.84  | 39 | 1 |
| Q8NE86     | Calcium uni2.84900285  | 1 | 1 | 1 | 39.8  | 8.65  | 40 | 1 |

|            |             |             |   |   |   |       |       |    |   |
|------------|-------------|-------------|---|---|---|-------|-------|----|---|
| Q96A35     | 39S ribosom | 4.62962963  | 1 | 1 | 1 | 24.9  | 9.29  | 0  | 1 |
| Q96LJ7     | Dehydrogen  | 4.47284345  | 1 | 1 | 1 | 33.9  | 7.83  | 18 | 1 |
| B2R5J1     | cDNA, FLJ9  | 9.4017094   | 1 | 1 | 1 | 13.9  | 8.79  | 0  | 1 |
| O43653     | Prostate s1 | 3.8211382   | 1 | 1 | 1 | 12.9  | 5.29  | 22 | 1 |
| Q9BT09     | Protein car | 5.03597122  | 1 | 1 | 1 | 30.7  | 5.49  | 0  | 1 |
| P32456     | Guanylate-t | 2.03045685  | 1 | 1 | 1 | 67.2  | 5.71  | 29 | 1 |
| E9PQY2     | Prefoldin   | 11.0294118  | 1 | 1 | 1 | 15.6  | 4.58  | 0  | 1 |
| P19388     | DNA-direct  | 4.28571429  | 1 | 1 | 1 | 24.5  | 5.95  | 33 | 1 |
| P61970     | Nuclear tra | 11.023622   | 1 | 1 | 1 | 14.5  | 5.38  | 0  | 1 |
| A0A024R5Q8 | CTD (Carbo  | 2.5751073   | 1 | 1 | 1 | 53    | 6.4   | 38 | 1 |
| O75787     | Renin rece  | 2.57142857  | 1 | 1 | 1 | 39    | 6.1   | 28 | 1 |
| Q99720     | Sigma non-c | 3.58744395  | 1 | 1 | 1 | 25.1  | 5.96  | 33 | 1 |
| Q02241     | Kinesin-lil | 1.35416667  | 1 | 1 | 1 | 110   | 8.51  | 28 | 1 |
| Q8WWQ0     | PH-interact | 0.98846787  | 1 | 1 | 1 | 206.6 | 8.85  | 0  | 1 |
| O75691     | Small subur | 0.46678636  | 1 | 1 | 1 | 318.2 | 7.39  | 16 | 1 |
| A0A024RBR3 | Density-reg | 4.58585859  | 1 | 1 | 1 | 22.1  | 5.3   | 0  | 1 |
| Q96GM8     | Target of F | 4.31372549  | 1 | 1 | 1 | 56.5  | 7.18  | 0  | 1 |
| Q9Y4W2     | Ribosomal   | 1.08991826  | 1 | 1 | 1 | 83    | 4.73  | 47 | 1 |
| F8WBV6     | Small EDRK  | -10.1851852 | 1 | 1 | 1 | 11.9  | 10.84 | 51 | 1 |
| B7ZM71     | MYO3B prot  | 3.20656227  | 1 | 8 | 1 | 151.7 | 8.15  | 0  | 1 |
| A0A087WYF7 | MICOS comp  | 4.10447761  | 1 | 1 | 1 | 29.2  | 9.45  | 0  | 1 |
| Q53FV1     | ORM1-like   | 1.18954248  | 1 | 1 | 1 | 17.4  | 9.64  | 31 | 1 |
| Q9BYD6     | 39S ribosom | 3.69230769  | 1 | 1 | 1 | 36.9  | 8.78  | 29 | 1 |
| Q96A33     | Coiled-coil | 2.07039337  | 1 | 1 | 1 | 55.8  | 4.87  | 34 | 1 |
| V9HWA9     | Epididymis  | 0.72158749  | 1 | 1 | 1 | 187   | 6.4   | 0  | 1 |
| A0A075B781 | Triacylgly  | 1.70575693  | 1 | 1 | 1 | 51.9  | 5.44  | 0  | 1 |
| Q8WW22     | DnaJ homol  | 3.02267003  | 1 | 1 | 1 | 44.8  | 7.59  | 26 | 1 |
| Q9Y5I4     | Protocadher | 2.68123138  | 1 | 1 | 1 | 109.4 | 5.41  | 0  | 1 |
| O75348     | V-type prot | 11.8644068  | 1 | 1 | 1 | 13.7  | 8.79  | 26 | 1 |
| G5E977     | Nicotinate  | 1.54109589  | 1 | 1 | 1 | 62.1  | 6.73  | 0  | 1 |
| Q96TA2     | ATP-depend  | 1.68175938  | 1 | 1 | 1 | 86.4  | 8.76  | 31 | 1 |
| Q99622     | Protein C1  | (12.6984127 | 1 | 1 | 1 | 13.2  | 5.14  | 0  | 1 |
| Q9BX69     | Caspase rec | 0.96432015  | 1 | 1 | 1 | 116.4 | 6.37  | 38 | 1 |
| A0A075B752 | Annexin OS  | -4.38356164 | 1 | 1 | 1 | 40.7  | 6.04  | 27 | 1 |
| O14907     | Tax1-bindin | 13.7096774  | 1 | 1 | 1 | 13.7  | 8.48  | 29 | 1 |
| E9PLP0     | Cysteine--  | 1.8.59375   | 1 | 1 | 1 | 14.3  | 9.13  | 26 | 1 |
| P78330     | Phosphoseri | 4           | 1 | 1 | 1 | 25    | 5.69  | 33 | 1 |
| A8K3B6     | Tyrosine-pi | 2.66666667  | 1 | 1 | 1 | 50.7  | 7.06  | 34 | 1 |
| Q15582     | Transformin | 1.9033675   | 1 | 1 | 1 | 74.6  | 7.71  | 29 | 1 |
| Q9Y2S0     | DNA-direct  | 8.27067669  | 1 | 1 | 1 | 15.2  | 5.8   | 29 | 1 |
| A0A024R625 | Serine/thre | 4.23452769  | 1 | 1 | 1 | 35.1  | 5.06  | 33 | 1 |
| Q92481     | Transcripti | 2.17391304  | 1 | 1 | 1 | 50.4  | 8.24  | 38 | 1 |
| Q96GG9     | DCN1-like   | 1.63320463  | 1 | 1 | 1 | 30.1  | 5.34  | 0  | 1 |
| Q6PIA2     | Lysophosph  | 2.05338809  | 1 | 1 | 1 | 56    | 8.69  | 36 | 1 |
| A0A024QZC1 | CD2 antige  | 2.93255132  | 1 | 1 | 1 | 37.6  | 4.61  | 20 | 1 |
| B4DKM0     | cDNA FLJ51  | 1.86666667  | 1 | 1 | 1 | 41.6  | 9.58  | 55 | 1 |
| B4DV95     | cDNA FLJ53  | 2.06896552  | 1 | 1 | 1 | 49    | 9.22  | 0  | 1 |
| A0A024R6N2 | CDC42 bindi | 0.52600818  | 1 | 1 | 1 | 194.2 | 6.37  | 0  | 1 |
| P08240     | Signal recc | 1.56739812  | 1 | 1 | 1 | 69.8  | 8.95  | 0  | 1 |
| Q9NWT6     | Hypoxia-inc | 4.58452722  | 1 | 1 | 1 | 40.3  | 5.57  | 21 | 1 |
| P62891     | 60S ribosom | 19.6078431  | 1 | 2 | 1 | 6.4   | 12.56 | 31 | 1 |
| Q9H3G5     | Probable se | 2.73109244  | 1 | 1 | 1 | 54.1  | 5.62  | 0  | 1 |
| Q9P2P6     | StAR-relate | 0.14893617  | 1 | 1 | 1 | 516   | 6.32  | 53 | 1 |
| R4GN35     | DENN domai  | 0.51072523  | 1 | 1 | 1 | 217.7 | 6.64  | 0  | 1 |
| Q14684     | Ribosomal   | 1.45118734  | 1 | 1 | 1 | 84.4  | 9.76  | 33 | 1 |
| Q9NY27     | Serine/thre | 2.87769784  | 1 | 1 | 1 | 46.9  | 4.54  | 0  | 1 |
| Q5TB52     | 3'-phospho  | 1.79153094  | 1 | 1 | 1 | 69.5  | 8.03  | 0  | 1 |
| Q9Y5I2     | Sorting anc | 1.49253731  | 1 | 1 | 1 | 51.9  | 6.9   | 48 | 1 |
| Q01581     | Hydroxymet  | 2.5         | 1 | 1 | 1 | 57.3  | 5.41  | 0  | 1 |
| A8K6X9     | cDNA FLJ76  | 0.85251492  | 1 | 1 | 1 | 133.4 | 6.77  | 0  | 1 |
| B4DG83     | cDNA FLJ50  | 110.4166667 | 1 | 1 | 1 | 26.4  | 5.11  | 0  | 1 |
| Q13868     | Exosome con | 4.09556314  | 1 | 1 | 1 | 32.8  | 7.5   | 39 | 1 |
| Q5T6V5     | UPF0553 pr  | 2.93255132  | 1 | 1 | 1 | 39    | 5.88  | 34 | 1 |
| A6NGJ0     | Dynein lig  | 11.1842105  | 1 | 1 | 1 | 17    | 5.92  | 0  | 1 |
| O94888     | UBX domain  | -2.65848671 | 1 | 1 | 1 | 54.8  | 5.16  | 25 | 1 |
| Q9BU89     | Deoxyhypos  | 3.97350993  | 1 | 1 | 1 | 32.9  | 4.83  | 23 | 1 |
| B2RE59     | cDNA, FLJ9  | 3.67892977  | 1 | 1 | 1 | 33.6  | 8.03  | 26 | 1 |
| Q9H0U6     | 39S ribosom | 5           | 1 | 1 | 1 | 20.6  | 9.54  | 28 | 1 |
| B9A6K1     | TBC1 domai  | 1.88679245  | 1 | 1 | 1 | 88.9  | 6.54  | 0  | 1 |
| O95983     | Methyl-CpG  | -3.43642612 | 1 | 1 | 1 | 32.8  | 5.34  | 33 | 1 |
| Q92747     | Actin-relat | 2.7027027   | 1 | 1 | 1 | 41.5  | 8.18  | 0  | 1 |
| Q99700     | Ataxin-2 O  | 1.44706778  | 1 | 1 | 1 | 140.2 | 9.57  | 0  | 1 |
| Q12959     | Disks large | 1.32743363  | 1 | 1 | 1 | 100.4 | 5.76  | 31 | 1 |

|            |             |              |   |   |   |       |       |    |   |
|------------|-------------|--------------|---|---|---|-------|-------|----|---|
| K7ENP4     | Centrosomal | 10.28901734  | 1 | 1 | 1 | 228.4 | 6.07  | 46 | 1 |
| O60783     | 28S ribosom | 10.15625     | 1 | 1 | 1 | 15.1  | 11.41 | 27 | 1 |
| Q8N2U0     | Transmembr  | 7.07964602   | 1 | 1 | 1 | 11.7  | 8.94  | 47 | 1 |
| O75376     | Nuclear rec | 0.53278689   | 1 | 1 | 1 | 270   | 7.11  | 0  | 1 |
| Q9Y4C8     | Probable R  | 1.35416667   | 1 | 1 | 1 | 107.3 | 6.54  | 25 | 1 |
| Q5TGZ0     | MICOS comp  | 18.97435897  | 1 | 1 | 1 | 8.8   | 8.5   | 48 | 1 |
| Q13572     | Inositol-t  | 3.14009662   | 1 | 1 | 1 | 45.6  | 6.16  | 21 | 1 |
| B2RCM6     | cDNA, FLJ9  | 8.30039526   | 1 | 1 | 1 | 28.2  | 9.54  | 0  | 1 |
| Q92620     | Pre-mRNA-s  | 1.0594947    | 1 | 1 | 1 | 140.4 | 6.54  | 0  | 1 |
| Q6FIB4     | F11 recept  | 2.67558528   | 1 | 1 | 1 | 32.6  | 7.9   | 36 | 1 |
| Q96ST2     | Protein IW  | 1.0989011    | 1 | 1 | 1 | 91.9  | 4.69  | 46 | 1 |
| Q8WWI5     | Choline tr  | 2.28310502   | 1 | 1 | 1 | 73.3  | 8.6   | 0  | 1 |
| B2RAW0     | cDNA, FLJ9  | 1.55844156   | 1 | 1 | 1 | 82.4  | 5.53  | 0  | 1 |
| Q6P5V6     | SNX5 prote  | 1.66990291   | 1 | 1 | 1 | 47.4  | 7.52  | 33 | 1 |
| AOA068F658 | Glucosylce  | 1.49253731   | 1 | 1 | 1 | 59.7  | 7.61  | 38 | 1 |
| Q7L5L3     | Glyceroph   | 4.40251572   | 1 | 1 | 1 | 36.6  | 7.97  | 26 | 1 |
| S4R3E2     | DnaJ homol  | 4.8245614    | 1 | 1 | 1 | 26.6  | 5.73  | 25 | 1 |
| Q6PIW4     | Fidgetin-l  | 1.78041543   | 1 | 1 | 1 | 74    | 7.85  | 24 | 1 |
| Q96TC7     | Regulator   | 2.34042553   | 1 | 1 | 1 | 52.1  | 5.1   | 29 | 1 |
| P41440     | Folate trar | 1.69204738   | 1 | 1 | 1 | 64.8  | 8.95  | 26 | 1 |
| Q9Y4H2     | Insulin rec | 0.74738416   | 1 | 1 | 1 | 137.2 | 8.65  | 0  | 1 |
| P35610     | Sterol O-ac | 2.90909091   | 1 | 1 | 1 | 64.7  | 8.94  | 0  | 1 |
| Q16643     | Drebrin OS  | 1.38674884   | 1 | 1 | 1 | 71.4  | 4.45  | 33 | 1 |
| L8EC67     | Alternative | 17.8571429   | 1 | 1 | 1 | 6.5   | 8.88  | 28 | 1 |
| B7Z2R7     | Acyl-CoA-b  | 3.63288719   | 1 | 1 | 1 | 58.8  | 5.26  | 21 | 1 |
| Q9NWW4     | UPF0587 pr  | 5            | 1 | 1 | 1 | 18    | 5.01  | 44 | 1 |
| Q15067     | Peroxisomal | 2.57575758   | 1 | 1 | 1 | 74.4  | 8.16  | 0  | 1 |
| P00395     | Cytochrome  | 1.55945419   | 1 | 1 | 1 | 57    | 6.7   | 32 | 1 |
| B4E0E0     | cDNA FLJ5   | 42.40549828  | 1 | 1 | 1 | 32.5  | 9.51  | 39 | 1 |
| O75179     | Ankyrin re  | 0.34575449   | 1 | 1 | 1 | 274.1 | 6.52  | 29 | 1 |
| Q8NBU5     | ATPase fam  | 2.21606648   | 1 | 1 | 1 | 40.7  | 6.9   | 30 | 1 |
| Q9Y2Q5     | Regulator   | 8            | 1 | 1 | 1 | 13.5  | 5.4   | 30 | 1 |
| O00273     | DNA fragme  | 4.22960725   | 1 | 1 | 1 | 36.5  | 4.79  | 27 | 1 |
| P42566     | Epidermal   | 1.45089286   | 1 | 1 | 1 | 98.6  | 4.64  | 0  | 1 |
| Q9HD42     | Charged mu  | 4.08163265   | 1 | 1 | 1 | 21.7  | 8.06  | 33 | 1 |
| Q1ED39     | Lysine-ric  | 3.05676856   | 1 | 1 | 1 | 51.6  | 9.86  | 23 | 1 |
| Q13823     | Nucleolar   | 1.64158687   | 1 | 1 | 1 | 83.6  | 9.25  | 0  | 1 |
| Q96PC5     | Melanoma    | ir0.99150142 | 1 | 1 | 1 | 159.7 | 4.69  | 0  | 1 |
| Q9NVE7     | Pantothen   | 1.81112549   | 1 | 1 | 1 | 85.9  | 6.28  | 26 | 1 |
| Q9NRK6     | ATP-binding | 2.16802168   | 1 | 1 | 1 | 79.1  | 9.85  | 24 | 1 |
| Q9BYP7     | Serine/thr  | 2.33333333   | 1 | 1 | 1 | 198.3 | 6.07  | 0  | 1 |
| Q99959     | Plakophil   | 1.47559591   | 1 | 1 | 1 | 97.4  | 9.33  | 22 | 1 |
| G8XV63     | Prostate    | c3.49075975  | 1 | 1 | 1 | 54    | 9.25  | 0  | 1 |
| Q9Y679     | Ancient ubi | 1.68067227   | 1 | 1 | 1 | 53    | 8.09  | 28 | 1 |
| Q53H82     | Endoribon   | 3.125        | 1 | 1 | 1 | 32.8  | 6.8   | 37 | 1 |
| AOA0AOMT83 | Isovaleryl  | -2.11267606  | 1 | 1 | 1 | 46.6  | 8.05  | 25 | 1 |
| Q7GIM7     | Cytochrome  | 5.36398467   | 1 | 1 | 1 | 29.9  | 7.31  | 0  | 1 |
| Q96ER9     | Coiled-coi  | 1.45985401   | 1 | 1 | 1 | 45.8  | 8.19  | 50 | 1 |
| Q9H467     | CUE domain  | -3.48432056  | 1 | 1 | 1 | 32    | 4.81  | 30 | 1 |
| Q8IYL3     | UPF0688 pr  | 5.76131687   | 1 | 1 | 1 | 26    | 6.9   | 38 | 1 |
| B2RAY1     | cDNA, FLJ9  | 1.85185185   | 1 | 1 | 1 | 59.1  | 4.84  | 30 | 1 |
| A8K7F7     | cDNA FLJ7   | 63.25670498  | 1 | 1 | 1 | 58.5  | 6.55  | 0  | 1 |
| AOA0AOMQW3 | Serpin B13  | 1.75         | 1 | 2 | 1 | 45.3  | 5.82  | 80 | 1 |
| Q5TA45     | Integrator  | 2            | 1 | 1 | 1 | 67.6  | 8.06  | 0  | 1 |
| Q14692     | Ribosome    | bi0.54602184 | 1 | 1 | 1 | 145.7 | 6.44  | 44 | 1 |
| P50851     | Lipopolys   | 0.55885435   | 1 | 1 | 1 | 318.9 | 5.6   | 23 | 1 |
| Q7Z6E9     | E3 ubiquit  | 0.72544643   | 1 | 1 | 1 | 201.4 | 9.64  | 16 | 1 |
| Q9NPE3     | H/ACA ribo  | r14.0625     | 1 | 1 | 1 | 7.7   | 9.99  | 29 | 1 |
| Q96J01     | THO comple  | 3.13390313   | 1 | 1 | 1 | 38.7  | 6.09  | 0  | 1 |
| AOA024QZS4 | Peptidyl-p  | r3.8647343   | 1 | 1 | 1 | 22    | 9.38  | 45 | 1 |
| Q14CX7     | N-alpha-acc | 0.82304527   | 1 | 1 | 1 | 112.2 | 6.64  | 36 | 1 |
| Q9UHR4     | Brain-spec  | i2.93542074  | 1 | 1 | 1 | 56.8  | 8.68  | 29 | 1 |
| O43929     | Origin rec  | c2.75229358  | 1 | 1 | 1 | 50.3  | 8     | 0  | 1 |
| Q13526     | Peptidyl-p  | r4.90797546  | 1 | 1 | 1 | 18.2  | 8.82  | 47 | 1 |
| E7ENX8     | Uncharacter | e2.13523132  | 1 | 1 | 1 | 92.9  | 7.24  | 0  | 1 |
| Q6NUT3     | Major fac   | il1.45833333 | 1 | 1 | 1 | 52    | 8.32  | 32 | 1 |
| AOA0AOMTL6 | Protein FA  | 0.80775444   | 1 | 1 | 1 | 134   | 6.43  | 0  | 1 |
| Q9BWS9     | Chitinase   | c2.79898219  | 1 | 1 | 1 | 44.9  | 8.63  | 27 | 1 |
| Q9P2I0     | Cleavage    | ar2.55754476 | 1 | 1 | 1 | 88.4  | 5.11  | 0  | 1 |
| X6RAY8     | 39S ribos   | on5.32212885 | 1 | 1 | 1 | 39.6  | 10.59 | 0  | 1 |
| AOA0B4J1V9 | Helicase,   | 11.13122172  | 1 | 1 | 1 | 102.7 | 7.65  | 27 | 1 |
| P34913     | Bifunction  | e3.6036036   | 1 | 2 | 1 | 62.6  | 6.28  | 0  | 1 |
| Q96S55     | ATPase WR   | N11.35338346 | 1 | 1 | 1 | 72.1  | 6.1   | 40 | 1 |

|            |             |              |   |   |   |       |       |    |   |
|------------|-------------|--------------|---|---|---|-------|-------|----|---|
| Q86V21     | Acetoacetyl | 1.33928571   | 1 | 1 | 1 | 75.1  | 6.24  | 33 | 1 |
| Q9NZ63     | Uncharacter | 2.76816609   | 1 | 1 | 1 | 33.7  | 6.74  | 34 | 1 |
| Q9BU23     | Lipase mat  | 1.13154173   | 1 | 1 | 1 | 79.6  | 10.1  | 37 | 1 |
| AOA0KOL4Y0 | Patatin-li  | 1.58730159   | 1 | 1 | 1 | 55.3  | 7.25  | 33 | 1 |
| A4D1L5     | Ubiquitin-c | 8.19672131   | 1 | 1 | 1 | 20.6  | 4.67  | 23 | 1 |
| Q9BTY7     | Protein HGI | 2.56410256   | 1 | 1 | 1 | 42.1  | 4.81  | 29 | 1 |
| A6P4V4     | Tyrosine-pi | 0.76335878   | 1 | 1 | 1 | 145.6 | 7.55  | 22 | 1 |
| Q92759     | General tr  | 1.73160173   | 1 | 1 | 1 | 52.2  | 9.04  | 38 | 1 |
| Q16098     | APC protei  | 25.6410256   | 1 | 1 | 1 | 4.6   | 5.26  | 20 | 1 |
| LOR6Q1     | SLC35A4 up  | 7.76699029   | 1 | 1 | 1 | 11.1  | 8.1   | 34 | 1 |
| Q9BU76     | Multiple m  | 5.32319392   | 1 | 1 | 1 | 29.4  | 10.02 | 0  | 1 |
| AOA024R8J2 | Protein tyr | 8.09248555   | 1 | 1 | 1 | 19.8  | 8.97  | 20 | 1 |
| Q9BYD2     | 39S riboso  | 2.99625468   | 1 | 1 | 1 | 30.2  | 10.08 | 33 | 1 |
| Q9UJ83     | 2-hydroxy   | 2.07612457   | 1 | 1 | 1 | 63.7  | 7.36  | 19 | 1 |
| Q96G21     | U3 small n  | 2.40549828   | 1 | 1 | 1 | 33.7  | 9.47  | 29 | 1 |
| Q9BYD1     | 39S riboso  | 5.61797753   | 1 | 1 | 1 | 20.7  | 9.16  | 32 | 1 |
| O60524     | Nuclear exp | 0.65055762   | 1 | 1 | 1 | 122.9 | 6.35  | 37 | 1 |
| Q9H8M5     | Metal tran  | 1.6          | 1 | 1 | 1 | 96.6  | 6.38  | 23 | 1 |
| Q8N8A6     | ATP-depend  | 1.35135135   | 1 | 1 | 1 | 72.4  | 8.16  | 0  | 1 |
| HOYJ66     | Dehydrogen  | 5.01253133   | 1 | 1 | 1 | 44.8  | 9.03  | 0  | 1 |
| B3KQU6     | cDNA PSEC   | 0.3.81679389 | 1 | 1 | 1 | 29.4  | 8.63  | 0  | 1 |
| Q9NX40     | OClA domai  | 4.48979592   | 1 | 1 | 1 | 27.6  | 7.49  | 0  | 1 |
| P35251     | Replicatio  | 1.39372822   | 1 | 1 | 1 | 128.2 | 9.36  | 23 | 1 |
| Q15042     | Rab3 GTPas  | 1.12130479   | 1 | 1 | 1 | 110.5 | 5.55  | 0  | 1 |
| P14854     | Cytochrome  | 9.30232558   | 1 | 3 | 1 | 10.2  | 7.05  | 30 | 1 |
| Q06787     | Synaptic fi | 1.74050633   | 1 | 1 | 1 | 71.1  | 7.42  | 29 | 1 |
| AOA0A0MQX8 | Muscleblin  | c.2.75       | 1 | 1 | 1 | 43    | 8.82  | 0  | 1 |
| Q99543     | DnaJ homol  | 1.28824477   | 1 | 1 | 1 | 72    | 8.7   | 27 | 1 |
| Q6IAQ2     | SDHC prote  | 7.69230769   | 1 | 1 | 1 | 18.6  | 9.69  | 0  | 1 |
| Q9NSI2     | Protein FA  | 5.65217391   | 1 | 2 | 1 | 25.4  | 11.08 | 33 | 1 |
| B2RDG1     | Fatty acyl  | -2.52427184  | 1 | 1 | 1 | 59.3  | 9.17  | 0  | 1 |
| B8ZC8      | Methyltran  | 4.50819672   | 1 | 1 | 1 | 27.8  | 8.22  | 20 | 1 |
| Q9UL15     | BAG family  | 1.78970917   | 1 | 1 | 1 | 51.2  | 6.05  | 0  | 1 |
| Q9NX62     | Inositol mc | 2.22841226   | 1 | 1 | 1 | 38.7  | 6.86  | 32 | 1 |
| AOA087X2G6 | Nucleolar   | 1.2.9535865  | 1 | 1 | 1 | 27.4  | 10.2  | 38 | 1 |
| P57740     | Nuclear por | 2.37837838   | 1 | 1 | 1 | 106.3 | 5.43  | 0  | 1 |
| O43491     | Band 4.1-l  | 1.99502488   | 1 | 1 | 1 | 112.5 | 5.44  | 25 | 1 |
| P09110     | 3-ketoacyl  | -3.06603774  | 1 | 1 | 1 | 44.3  | 8.44  | 34 | 1 |
| Q9HOP0     | Cytosolic   | 14.76190476  | 1 | 1 | 1 | 37.9  | 7.12  | 22 | 1 |
| P63172     | Dynein lig  | 14.159292    | 1 | 1 | 1 | 12.4  | 5.08  | 0  | 1 |
| Q9H8H2     | Probable A  | 11.52761457  | 1 | 1 | 1 | 94    | 9.99  | 40 | 1 |
| P09497     | Clathrin li | 3.05676856   | 1 | 1 | 1 | 25.2  | 4.64  | 37 | 1 |
| Q96DV4     | 39S riboso  | 5.78947368   | 1 | 1 | 1 | 44.6  | 7.53  | 0  | 1 |
| Q6ZRP7     | Sulfhydryl  | 2.14899713   | 1 | 1 | 1 | 77.5  | 7.72  | 0  | 1 |
| P18858     | DNA ligase  | 1.30576714   | 1 | 1 | 1 | 101.7 | 5.62  | 0  | 1 |
| P60604     | Ubiquitin-c | 9.09090909   | 1 | 1 | 1 | 18.6  | 4.7   | 25 | 1 |
| O95159     | Zinc finger | 2.58064516   | 1 | 1 | 1 | 34.1  | 8.07  | 0  | 1 |
| AOA024R9I0 | V-type prot | 2.09424084   | 1 | 1 | 1 | 43.9  | 7.46  | 41 | 1 |
| B1AKJ6     | Oxysterol-t | 1.75438596   | 1 | 1 | 1 | 83.7  | 6.48  | 0  | 1 |
| Q6IAD8     | SLC39A1 pr  | c.3.7037037  | 1 | 1 | 1 | 34.1  | 5.71  | 0  | 1 |
| E9PGK7     | Transient   | 1.0.4507405  | 1 | 1 | 1 | 176.4 | 7.74  | 38 | 1 |
| AOA0G2JHL1 | G patch don | 11.5168539   | 1 | 4 | 1 | 39.4  | 8.46  | 0  | 1 |
| O75419     | Cell divisi | 1.76678445   | 1 | 1 | 1 | 65.5  | 5.53  | 27 | 1 |
| O75344     | Inactive pe | 6.11620795   | 1 | 1 | 1 | 37.2  | 6.89  | 0  | 1 |
| A0JLP2     | SEMG1 prot  | c.3.37423313 | 1 | 1 | 1 | 36.9  | 9.88  | 20 | 1 |
| Q53G08     | DNA replic  | 4.32432432   | 1 | 1 | 1 | 21.4  | 5.64  | 32 | 1 |
| P62487     | DNA-direct  | c.6.97674419 | 1 | 1 | 1 | 19.3  | 5.54  | 19 | 1 |
| B4E3I3     | cDNA FLJ5   | 94.76190476  | 1 | 1 | 1 | 35.4  | 5.72  | 21 | 1 |
| E7EQY1     | Protein FA  | 3.67346939   | 1 | 1 | 1 | 26.8  | 8.24  | 35 | 1 |
| Q9HBH0     | Rho-relate  | c.3.31753555 | 1 | 1 | 1 | 23.6  | 8.65  | 41 | 1 |
| Q8TDB8     | Solute car  | 1.73076923   | 1 | 1 | 1 | 56.3  | 7.83  | 33 | 1 |
| B4E2A6     | cDNA FLJ5   | 51.19680851  | 1 | 1 | 1 | 83.9  | 6.84  | 0  | 1 |
| B4E2L0     | cDNA FLJ5   | 42.26130653  | 1 | 1 | 1 | 46.2  | 8.69  | 25 | 1 |
| Q15018     | BRISC compl | 1.92771084   | 1 | 1 | 1 | 46.9  | 6.21  | 0  | 1 |
| J3QLS3     | 28S riboso  | 5.16605166   | 1 | 1 | 1 | 31.7  | 9.86  | 22 | 1 |
| H3BMF4     | Protein sp  | j2.44328098  | 1 | 1 | 1 | 61.1  | 7.84  | 19 | 1 |
| Q14691     | DNA replic  | c.7.14285714 | 1 | 1 | 1 | 23    | 7.39  | 14 | 1 |
| Q9BRK5     | 45 kDa calc | 2.48618785   | 1 | 1 | 1 | 41.8  | 4.86  | 0  | 1 |
| Q99575     | Ribonuclea  | s.0.78125    | 1 | 1 | 1 | 114.6 | 9.22  | 35 | 1 |
| P46934     | E3 ubiquiti | 1.0.6823351  | 1 | 1 | 1 | 149   | 6.58  | 27 | 1 |
| O14562     | Ubiquitin   | c.3.88349515 | 1 | 1 | 1 | 33.4  | 5.77  | 28 | 1 |
| Q3KRB4     | MRPS33 prot | 10.7142857   | 1 | 1 | 1 | 13.4  | 10.15 | 0  | 1 |
| Q8N523     | Tuftelin-ir | 1.43369176   | 1 | 1 | 1 | 96.7  | 5.67  | 21 | 1 |



|            |                        |   |   |   |       |      |    |   |
|------------|------------------------|---|---|---|-------|------|----|---|
| Q9HOC8     | Integrin-li2.55102041  | 1 | 1 | 1 | 42.9  | 7.09 | 28 | 1 |
| P15036     | Protein C-ε1.91897655  | 1 | 1 | 1 | 53    | 5.03 | 0  | 1 |
| Q96DH6     | RNA-binding4.57317073  | 1 | 1 | 1 | 35.2  | 8.48 | 25 | 1 |
| Q5HYI8     | Rab-like p14.66101695  | 1 | 1 | 1 | 26.4  | 7.11 | 0  | 1 |
| Q93050     | V-type prot1.31421744  | 1 | 1 | 1 | 96.4  | 6.43 | 38 | 1 |
| Q9H8H0     | Nucleolar p1.6689847   | 1 | 1 | 1 | 81.1  | 6.07 | 22 | 1 |
| Q8IUX1     | Complex I ε6.08695652  | 1 | 1 | 1 | 25.9  | 8.81 | 20 | 1 |
| A0A087X266 | Transmembrε2.98102981  | 1 | 1 | 1 | 42.9  | 8.43 | 0  | 1 |
| Q08AM6     | Protein VAC 1.0230179  | 1 | 1 | 1 | 87.9  | 6.13 | 38 | 1 |
| Q3ZAQ7     | Vacuolar A111.8811881  | 1 | 1 | 1 | 11.3  | 7.24 | 32 | 1 |
| O14732     | Inositol mc 3.125      | 1 | 1 | 1 | 31.3  | 6.61 | 25 | 1 |
| Q9BTD8     | RNA-binding 5.625      | 1 | 1 | 1 | 50.4  | 9.63 | 0  | 1 |
| Q14432     | cGMP-inhibi1.31463628  | 1 | 1 | 1 | 124.9 | 6    | 19 | 1 |
| Q9NTJ5     | Phosphatidyl1.53321976 | 1 | 1 | 1 | 66.9  | 7.12 | 0  | 1 |
| Q49B96     | Cytochrome 11.1111111  | 1 | 1 | 1 | 10.4  | 8.72 | 31 | 1 |
| Q567U6     | Coiled-coil1.42630745  | 1 | 1 | 1 | 73.2  | 8.15 | 31 | 1 |
| A6NKF1     | SAC3 domain3.71287129  | 1 | 1 | 1 | 43.5  | 8.69 | 0  | 1 |
| Q32Q10     | RSU1 protei 2.5        | 1 | 1 | 1 | 31.3  | 9.09 | 47 | 1 |
| E7EW49     | CLIP-associ1.05680317  | 1 | 1 | 1 | 165.6 | 8.25 | 0  | 1 |
| Q9NTX5     | Ethylmalonε3.58306189  | 1 | 1 | 1 | 33.7  | 8.21 | 0  | 1 |
| A0A024R9D9 | Transcripti8.91089109  | 1 | 1 | 1 | 11.5  | 9.33 | 0  | 1 |
| P49757     | Protein nun1.22887865  | 1 | 1 | 1 | 70.8  | 8.51 | 0  | 1 |
| Q6P161     | 39S riboson7.24637681  | 1 | 1 | 1 | 15.8  | 9.6  | 0  | 1 |
| D3DU01     | Transmembrε1.67064439  | 1 | 1 | 1 | 47.5  | 6.65 | 0  | 1 |
| Q9UID3     | Vacuolar p11.91815857  | 1 | 1 | 1 | 86    | 6.47 | 20 | 1 |
| P17568     | NADH dehydr7.29927007  | 1 | 1 | 1 | 16.4  | 8.92 | 0  | 1 |
| P20290     | Transcripti3.88349515  | 1 | 1 | 1 | 22.2  | 9.38 | 31 | 1 |
| P29372     | DNA-3-methy1.02684564  | 1 | 1 | 1 | 32.8  | 9.57 | 22 | 1 |
| Q06136     | 3-ketodihyc2.40963855  | 1 | 1 | 1 | 36.2  | 7.12 | 23 | 1 |
| O60825     | 6-phosphofi1.98019802  | 1 | 1 | 1 | 58.4  | 8.38 | 29 | 1 |
| Q8N3D4     | EH domain-t1.18187787  | 1 | 1 | 1 | 161.8 | 4.83 | 0  | 1 |
| Q9UHW5     | GPN-loop G14.57746479  | 1 | 1 | 1 | 32.7  | 4.5  | 0  | 1 |
| Q59FZ4     | Serine/thre2.54403131  | 1 | 1 | 1 | 57.8  | 5.16 | 0  | 1 |
| O95372     | Acyl-protei3.46320346  | 1 | 1 | 1 | 24.7  | 7.23 | 27 | 1 |
| Q8NFC6     | Biorientati0.49164208  | 1 | 1 | 1 | 330.3 | 5.08 | 22 | 1 |
| MOR2A0     | ER membrane2.15633423  | 1 | 1 | 1 | 39    | 6.9  | 20 | 1 |
| Q9NX74     | tRNA-dihyd3.44827586   | 1 | 1 | 1 | 55    | 7.11 | 26 | 1 |
| D6REA1     | Nucleotide 1.70940171  | 1 | 1 | 1 | 52.7  | 5.3  | 0  | 1 |
| Q2T9J0     | Peroxisomal 1.9434629  | 1 | 1 | 1 | 59.3  | 6.2  | 0  | 1 |
| O00165     | HCLS1-assoc8.96057348  | 1 | 1 | 1 | 31.6  | 4.92 | 0  | 1 |
| K7ESQ2     | Kinetochore 4.784689   | 1 | 1 | 1 | 23.5  | 4.86 | 0  | 1 |
| P13807     | Glycogen [ε2.71370421  | 1 | 1 | 1 | 83.7  | 6.18 | 0  | 1 |
| Q9NVM9     | Protein ast1.69971671  | 1 | 1 | 1 | 80.2  | 6.7  | 0  | 1 |
| Q9UKR5     | Probable ei7.14285714  | 1 | 1 | 1 | 15.9  | 9.83 | 0  | 1 |
| Q9H4L4     | Sentrin-spe 3.1358885  | 1 | 1 | 1 | 65    | 8.56 | 0  | 1 |
| D3DSY9     | Farnesyltrε1.53172867  | 1 | 1 | 1 | 52.6  | 5.57 | 34 | 1 |
| F8WF23     | Synaptopor18.66666667  | 1 | 1 | 1 | 8.1   | 6.48 | 0  | 1 |
| B2R8X4     | cDNA, FLJ9ε3.30396476  | 1 | 1 | 1 | 51.2  | 4.97 | 19 | 1 |
| A0A024RBV9 | Transducin 2.7729636   | 1 | 1 | 1 | 62.5  | 6.55 | 0  | 1 |
| P56381     | ATP synthaε13.7254902  | 1 | 1 | 1 | 5.8   | 9.92 | 32 | 1 |
| Q7Z511     | WW-domain f3.83141762  | 1 | 1 | 1 | 28.1  | 5.91 | 0  | 1 |
| A0A1BOGTW1 | Tight junct0.64051241  | 1 | 1 | 1 | 140.6 | 8.19 | 29 | 1 |
| Q9NQ88     | Fructose-2,3.33333333  | 1 | 1 | 1 | 30    | 7.69 | 26 | 1 |
| Q6UVK1     | Chondroitin0.34453058  | 1 | 1 | 1 | 250.4 | 5.47 | 0  | 1 |
| Q8TCJ2     | Dolichyl-dj 1.4527845  | 1 | 1 | 1 | 93.6  | 8.91 | 0  | 1 |
| B4DEF8     | cDNA FLJ6112.73556231  | 1 | 1 | 1 | 37.8  | 9.13 | 26 | 1 |
| A0A0C4MVT1 | Bax proteir6.37254902  | 1 | 1 | 1 | 22.6  | 5.31 | 21 | 1 |
| O75935     | Dynactin st5.91397849  | 1 | 1 | 1 | 21.1  | 5.47 | 20 | 1 |
| A0A024R3L9 | Vacuolar p3.27380952   | 1 | 1 | 1 | 39.1  | 7.36 | 0  | 1 |
| P62854     | 40S riboson7.82608696  | 1 | 1 | 1 | 13    | 11   | 34 | 1 |
| Q9NPA0     | ER membrane 4.1322314  | 1 | 1 | 1 | 26.5  | 9.25 | 16 | 1 |
| H3BSQ1     | WD repeat ε 10.9375    | 1 | 1 | 1 | 7.1   | 6.25 | 40 | 1 |
| B5BUI8     | Dual specifi6.48648649 | 1 | 1 | 1 | 20.6  | 8.15 | 22 | 1 |
| P07203     | Glutathione5.91133005  | 1 | 1 | 1 | 22.1  | 6.55 | 0  | 1 |
| O95139     | NADH dehydr 7.8125     | 1 | 1 | 1 | 15.5  | 9.63 | 0  | 1 |
| Q8WUH1     | Protein Cht9.35251799  | 1 | 1 | 1 | 16.1  | 5.54 | 0  | 1 |
| Q8IZH2     | 5'-3' exori0.58616647  | 1 | 1 | 1 | 194   | 7.21 | 0  | 1 |
| Q5JS54     | Proteasome 7.31707317  | 1 | 1 | 1 | 13.8  | 6.52 | 0  | 1 |
| A6NIH7     | Protein unc3.58565737  | 1 | 1 | 1 | 28.1  | 5.68 | 0  | 1 |
| Q16740     | ATP-dependε2.88808664  | 1 | 1 | 1 | 30.2  | 8.09 | 0  | 1 |
| P04424     | Argininosuc2.37068966  | 1 | 1 | 1 | 51.6  | 6.48 | 0  | 1 |
| Q9NZZ3     | Charged mu17.30593607  | 1 | 1 | 1 | 24.6  | 4.83 | 0  | 1 |
| Q53FA7     | Quinone oxi2.40963855  | 1 | 1 | 1 | 35.5  | 7.17 | 25 | 1 |

|            |                        |   |   |   |       |       |    |   |
|------------|------------------------|---|---|---|-------|-------|----|---|
| P21964     | Catechol O-2.95202952  | 1 | 1 | 1 | 30    | 5.47  | 33 | 1 |
| Q9HD20     | Manganese-10.74750831  | 1 | 1 | 1 | 132.9 | 8.13  | 0  | 1 |
| Q9UNL2     | Translocon-7.56756757  | 1 | 2 | 1 | 21.1  | 9.61  | 46 | 1 |
| Q8N6H7     | ADP-ribosyl1.72744722  | 1 | 1 | 1 | 56.7  | 7.99  | 0  | 1 |
| Q8N5K1     | CDGSH iron-8.88888889  | 1 | 1 | 1 | 15.3  | 9.61  | 30 | 1 |
| P53384     | Cytosolic f 5.625      | 1 | 1 | 1 | 34.5  | 5.33  | 18 | 1 |
| P49750     | YLP motif-c1.12762686  | 1 | 1 | 1 | 219.8 | 6.57  | 0  | 1 |
| B2RBY4     | DNA primase5.23809524  | 1 | 1 | 1 | 49.9  | 8.38  | 0  | 1 |
| B2R739     | cDNA, FLJ9:5.40540541  | 1 | 1 | 1 | 33.4  | 10.01 | 0  | 1 |
| C9JJ19     | 28S ribosom3.55555556  | 1 | 2 | 1 | 26.3  | 9.89  | 54 | 1 |
| Q59FC3     | G protein-c1.42118863  | 1 | 1 | 1 | 85.8  | 7.09  | 0  | 1 |
| Q99816     | Tumor suscep2.56410256 | 1 | 1 | 1 | 43.9  | 6.46  | 20 | 1 |
| Q6INA3     | OXCT2 prote5.40540541  | 1 | 1 | 1 | 27.6  | 8.47  | 0  | 1 |
| Q9NZL4     | Hsp70-bindj2.76243094  | 1 | 1 | 1 | 39.4  | 5.21  | 33 | 1 |
| Q5BJF2     | Transmembr4.54545455   | 1 | 1 | 1 | 20.8  | 9.38  | 29 | 1 |
| A8K5M4     | cDNA FLJ75:1.71755725  | 1 | 1 | 1 | 58    | 5.85  | 0  | 1 |
| E5KND5     | Elongation 1.59786951  | 1 | 1 | 1 | 83.4  | 7.01  | 27 | 1 |
| Q96HR9     | Receptor e3.79146919   | 1 | 1 | 1 | 23.4  | 8.56  | 36 | 1 |
| Q9Y2Z4     | Tyrosine--t2.72536688  | 1 | 1 | 1 | 53.2  | 8.98  | 0  | 1 |
| O75818     | Ribonuclea1.92837466   | 1 | 1 | 1 | 41.8  | 6.67  | 0  | 1 |
| Q6IN84     | rRNA methyl3.11614731  | 1 | 1 | 1 | 38.6  | 7.94  | 0  | 1 |
| O14617     | AP-3 comple0.78057242  | 1 | 1 | 1 | 130.1 | 8.48  | 24 | 1 |
| BOYIW2     | Apolipoprot6.83760684  | 1 | 1 | 1 | 12.8  | 8.18  | 0  | 1 |
| O43676     | NADH dehydi11.2244898  | 1 | 1 | 1 | 11.4  | 9.2   | 0  | 1 |
| Q8NCF5     | NFATC2-inte4.05727924  | 1 | 1 | 1 | 45.8  | 6.6   | 0  | 1 |
| A8K5S3     | cDNA FLJ78:1.92307692  | 1 | 1 | 1 | 39.7  | 5.35  | 35 | 1 |
| G3V2U7     | Acylphosph7.75193798   | 1 | 1 | 1 | 14.1  | 9.7   | 0  | 1 |
| Q9UBC2     | Epidermal 4.92592593   | 1 | 1 | 1 | 94.2  | 5.11  | 29 | 1 |
| Q9UNZ5     | Leydig cell17.07070707 | 1 | 1 | 1 | 10.6  | 11.55 | 36 | 1 |
| AOA0AOMR51 | Fatty acid 1.79640719  | 1 | 1 | 1 | 57.8  | 9.48  | 0  | 1 |
| Q9NPA3     | Midl-inter4.3715847    | 1 | 1 | 1 | 20.2  | 5.5   | 0  | 1 |
| B2R8K8     | cDNA, FLJ9:2.64900662  | 1 | 1 | 1 | 34.5  | 8.25  | 28 | 1 |
| Q15102     | Platelet-ac 3.8961039  | 1 | 1 | 1 | 25.7  | 6.84  | 24 | 1 |
| Q8N6T3     | ADP-ribosyl3.69458128  | 1 | 1 | 1 | 44.6  | 5.66  | 0  | 1 |
| Q9H330     | Transmembr1.42700329   | 1 | 1 | 1 | 100.9 | 8.87  | 0  | 1 |
| E7EW20     | Unconventic0.61776062  | 1 | 1 | 1 | 149.8 | 8.51  | 0  | 1 |
| A8K818     | cDNA FLJ75:2.74509804  | 1 | 1 | 1 | 54.9  | 8.19  | 14 | 1 |
| Q6NUL7     | SPTLC1 prot1.55945419  | 1 | 1 | 1 | 57.4  | 7.46  | 0  | 1 |
| Q05519     | Serine/argi2.89256198  | 1 | 1 | 1 | 53.5  | 10.52 | 0  | 1 |
| Q96IJ6     | Mannose-1-3.33333333   | 1 | 1 | 1 | 46.3  | 7.21  | 19 | 1 |
| Q96K17     | Transcripti4.43037975  | 1 | 1 | 1 | 17.3  | 6.35  | 42 | 1 |
| Q8TB61     | Adenosine 2.5462963    | 1 | 1 | 1 | 47.5  | 9.16  | 0  | 1 |
| Q9H942     | cDNA FLJ13:5.41044776  | 1 | 2 | 1 | 62    | 8.53  | 0  | 1 |
| B2R8Z7     | cDNA, FLJ9:2.74841438  | 1 | 1 | 1 | 50.6  | 6.77  | 0  | 1 |
| O60344     | Endothelin- 1.3590034  | 1 | 1 | 1 | 99.7  | 5.1   | 0  | 1 |
| Q9NYJ1     | Cytochrome 10.3448276  | 1 | 1 | 1 | 10.1  | 6.04  | 0  | 1 |
| A0AVT1     | Ubiquitin-10.76045627  | 1 | 1 | 1 | 117.9 | 6.14  | 0  | 1 |
| B2RAL9     | Dual speci11.82291667  | 1 | 1 | 1 | 41.8  | 6.33  | 41 | 1 |
| B7Z4W5     | Cysteine cc2.51937984  | 1 | 1 | 1 | 57.6  | 7.43  | 25 | 1 |
| Q14739     | Lamin-B rec1.30081301  | 1 | 1 | 1 | 70.7  | 9.36  | 39 | 1 |
| B4E1Z4     | cDNA FLJ55:1.10584518  | 1 | 1 | 1 | 140.9 | 7.18  | 21 | 1 |
| Q86Y56     | Dynein asse1.28654971  | 1 | 1 | 1 | 93.5  | 6.42  | 23 | 1 |
| O43772     | Mitochondri2.65780731  | 1 | 1 | 1 | 32.9  | 9.41  | 28 | 1 |
| Q06587     | E3 ubiquiti2.95566502  | 1 | 1 | 1 | 42.4  | 5.62  | 0  | 1 |
| Q9BUH6     | Protein PA5.88235294   | 1 | 1 | 1 | 21.6  | 5.48  | 28 | 1 |
| P61962     | DDB1- and (3.21637427  | 1 | 1 | 1 | 38.9  | 5.52  | 0  | 1 |
| A8K8N5     | cDNA FLJ76:0.89445438  | 1 | 1 | 1 | 127.4 | 8.56  | 31 | 1 |
| Q53HE6     | HSPC163 prc14.3884892  | 1 | 1 | 1 | 16    | 6.98  | 0  | 1 |
| Q53G26     | DnaJ (Hsp4)3.33333333  | 1 | 1 | 1 | 52.5  | 9.26  | 0  | 1 |
| Q99797     | Mitochondri0.98176718  | 1 | 1 | 1 | 80.6  | 7.05  | 56 | 1 |
| V9HW44     | Epididymis 9.6069869   | 1 | 1 | 1 | 25.6  | 5.92  | 0  | 1 |
| P29083     | General tr3.41685649   | 1 | 1 | 1 | 49.4  | 4.82  | 0  | 1 |
| Q8N584     | Tetratricol1.88679245  | 1 | 1 | 1 | 65.8  | 6.99  | 0  | 1 |
| Q9NV31     | U3 small nt8.15217391  | 1 | 1 | 1 | 21.8  | 9.5   | 26 | 1 |
| D3DUP1     | WNK lysine 0.62972292  | 1 | 1 | 1 | 250.6 | 6.34  | 0  | 1 |
| MOQZR4     | Rho guanin1.34297521   | 1 | 1 | 1 | 108.3 | 6.15  | 22 | 1 |
| AOA068F7M9 | FH1/FH2 don1.09243697  | 1 | 1 | 1 | 129.2 | 6.37  | 22 | 1 |
| Q9UBB5     | Methyl-CpG-3.64963504  | 1 | 1 | 1 | 43.2  | 10.04 | 24 | 1 |
| Q86UK7     | E3 ubiquiti0.99557522  | 1 | 1 | 1 | 98.6  | 8.4   | 0  | 1 |
| B2RDK5     | cDNA, FLJ9:1.81818182  | 1 | 1 | 1 | 47.7  | 8.98  | 0  | 1 |
| Q9H201     | Epsin-3 OS=1.89873418  | 1 | 1 | 1 | 68.2  | 5.91  | 0  | 1 |
| S4R347     | Formin-bin1.64203612   | 1 | 1 | 1 | 70.5  | 6.64  | 0  | 1 |
| B5MDU6     | Lipid dropl 2.7027027  | 1 | 1 | 1 | 42.6  | 6.93  | 29 | 1 |

|            |                |            |   |   |   |       |      |    |   |
|------------|----------------|------------|---|---|---|-------|------|----|---|
| Q9Y3P9     | Rab GTPase-    | 0.9354537  | 1 | 1 | 1 | 121.7 | 5.25 | 0  | 1 |
| Q13322     | Growth fact1.  | 51515152   | 1 | 1 | 1 | 67.2  | 7.87 | 21 | 1 |
| P16219     | Short-chair3.  | 15533981   | 1 | 1 | 1 | 44.3  | 7.99 | 0  | 1 |
| AOA0S2Z381 | Adenosine c3.  | 03030303   | 1 | 1 | 1 | 40.7  | 5.95 | 27 | 1 |
| Q9NPD8     | Ubiquitin-c    | 7.6142132  | 1 | 1 | 1 | 22.5  | 7.99 | 0  | 1 |
| AOA0G2JPZ2 | Taste recej    | 2.22929936 | 1 | 1 | 1 | 36.2  | 9.44 | 43 | 1 |
| E7EQR8     | Protein YIF2.  | 52808989   | 1 | 1 | 1 | 38.9  | 5.6  | 28 | 1 |
| Q9H6E4     | Coiled-coil3.  | 05676856   | 1 | 1 | 1 | 26.5  | 8.85 | 0  | 1 |
| P54105     | Methylosome    | 5.48523207 | 1 | 1 | 1 | 26.2  | 4.11 | 0  | 1 |
| Q969S3     | Zinc finger3.  | 14465409   | 1 | 1 | 1 | 54.2  | 6.15 | 20 | 1 |
| B2R694     | Terpene cycl   | 1.77595628 | 1 | 1 | 1 | 83.4  | 6.61 | 0  | 1 |
| G5E975     | SWI/SNF rel4.  | 06091371   | 1 | 1 | 1 | 45    | 5.76 | 0  | 1 |
| A4D0P7     | Origin recc    | 2.06896552 | 1 | 1 | 1 | 50.3  | 7.74 | 0  | 1 |
| Q9HCN8     | Stromal ce19.  | 04977376   | 1 | 1 | 1 | 23.6  | 7.03 | 0  | 1 |
| Q7L273     | BTB/POZ don2.  | 31362468   | 1 | 1 | 1 | 42.5  | 6.37 | 22 | 1 |
| Q8N8N7     | Prostaglanc    | 2.27920228 | 1 | 1 | 1 | 38.5  | 5.41 | 31 | 1 |
| P50238     | Cysteine-ri10. | 3896104    | 1 | 1 | 1 | 8.5   | 8.75 | 27 | 1 |

Table S6 (c). Identified proteins by 0.1%SDS

| Accession  | Description                    | Coverage   | # Peptides | # PSMs | # Unique | PcMW [kDa] | calc. pI | Score | Mascot# | Peptides | Mascot |
|------------|--------------------------------|------------|------------|--------|----------|------------|----------|-------|---------|----------|--------|
| Q15149     | Plectin OS=                    | 47.5448335 | 187        | 242    | 181      | 531.5      | 5.96     | 3818  |         | 187      |        |
| P49327     | Fatty acid 50.6969335          |            | 109        | 204    | 108      | 273.3      | 6.44     | 4278  |         | 109      |        |
| P31327     | Carbamoyl- $\gamma$            | 69.2       | 98         | 202    | 96       | 164.8      | 6.74     | 3252  |         | 98       |        |
| V9HWB8     | Pyruvate ki78.9077213          |            | 50         | 166    | 50       | 57.9       | 7.84     | 3961  |         | 50       |        |
| P10809     | 60 kDa heat81.6753927          |            | 59         | 175    | 59       | 61         | 5.87     | 4188  |         | 59       |        |
| P35579     | Myosin-9 OS=                   | 51.7346939 | 104        | 162    | 104      | 226.4      | 5.6      | 3347  |         | 104      |        |
| Q60FE5     | Filamin A (47.8625954          |            | 94         | 172    | 2        | 278.1      | 6.06     | 2709  |         | 94       |        |
| P21333     | Filamin-A (48.1677371          |            | 94         | 167    | 2        | 280.6      | 6.06     | 2663  |         | 94       |        |
| P08238     | Heat shock 65.3314917          |            | 66         | 257    | 17       | 83.2       | 5.03     | 5148  |         | 66       |        |
| P07900     | Heat shock 61.2021858          |            | 67         | 241    | 48       | 84.6       | 5.02     | 5004  |         | 67       |        |
| P13639     | Elongation 66.3170163          |            | 67         | 200    | 66       | 95.3       | 6.83     | 3674  |         | 67       |        |
| Q1KLZ0     | HCG15971, i                    | 93.6       | 40         | 299    | 1        | 41.7       | 5.48     | 6880  |         | 40       |        |
| P63261     | Actin, cytc                    | 93.6       | 40         | 301    | 1        | 41.8       | 5.48     | 6943  |         | 40       |        |
| O75369     | Filamin-B (47.8478094          |            | 100        | 165    | 94       | 278        | 5.73     | 2579  |         | 100      |        |
| P06733     | Alpha-enol:87.0967742          |            | 47         | 212    | 35       | 47.1       | 7.39     | 5172  |         | 47       |        |
| AOA0G2JIW1 | Heat shock 67.6012461          |            | 49         | 145    | 7        | 70.1       | 5.66     | 2996  |         | 49       |        |
| Q14204     | Cytoplasmic29.7890659          |            | 106        | 139    | 106      | 532.1      | 6.4      | 2193  |         | 106      |        |
| P04406     | Glyceraldeh85.3731343          |            | 40         | 149    | 40       | 36         | 8.46     | 2931  |         | 40       |        |
| P07437     | Tubulin bet85.5855856          |            | 39         | 239    | 4        | 49.6       | 4.89     | 3870  |         | 39       |        |
| P68371     | Tubulin bet85.3932584          |            | 39         | 235    | 2        | 49.8       | 4.89     | 3794  |         | 39       |        |
| P78527     | DNA-depende27.5920543          |            | 95         | 131    | 95       | 468.8      | 7.12     | 2373  |         | 95       |        |
| Q09666     | Neuroblast 40.0848896          |            | 100        | 134    | 100      | 628.7      | 6.15     | 1532  |         | 100      |        |
| V9HW22     | Epididymis 58.5139319          |            | 46         | 151    | 40       | 70.9       | 5.52     | 3069  |         | 46       |        |
| B4DWK5     | cDNA FLJ54:65.1685393          |            | 43         | 123    | 1        | 68         | 5.5      | 2509  |         | 43       |        |
| P04075     | Fructose-bi97.8021978          |            | 40         | 142    | 35       | 39.4       | 8.09     | 2868  |         | 40       |        |
| AOA087WVQ6 | Clathrin he 42.823109          |            | 66         | 108    | 66       | 191.9      | 5.69     | 1949  |         | 66       |        |
| P00558     | Phosphoglyc87.0503597          |            | 40         | 150    | 40       | 44.6       | 8.1      | 2935  |         | 40       |        |
| P05787     | Keratin, ty89.4409938          |            | 54         | 134    | 45       | 53.7       | 5.59     | 2444  |         | 54       |        |
| V9HWE1     | Epididymis 90.9871245          |            | 56         | 134    | 53       | 53.6       | 5.12     | 2410  |         | 56       |        |
| Q00839     | Heterogenec54.0606061          |            | 47         | 125    | 47       | 90.5       | 6        | 1806  |         | 47       |        |
| V9HW80     | Epididymis 64.6401985          |            | 52         | 92     | 52       | 89.3       | 5.26     | 1867  |         | 52       |        |
| P04350     | Tubulin bet72.5225225          |            | 31         | 203    | 2        | 49.6       | 4.88     | 3109  |         | 31       |        |
| P07814     | Bifunctione52.7777778          |            | 66         | 101    | 66       | 170.5      | 7.33     | 1647  |         | 66       |        |
| AOA024R1A3 | Testicular 50.1890359          |            | 44         | 88     | 44       | 117.8      | 5.76     | 1941  |         | 44       |        |
| B2R6L0     | Tubulin bet55.2808989          |            | 30         | 171    | 1        | 49.9       | 4.89     | 2846  |         | 30       |        |
| P19338     | Nucleolin ( 44.084507          |            | 43         | 86     | 43       | 76.6       | 4.7      | 1875  |         | 43       |        |
| P26038     | Moesin OS=77.2963605           |            | 57         | 129    | 40       | 67.8       | 6.4      | 2211  |         | 57       |        |
| P02545     | Prelamin-A/ 77.560241          |            | 55         | 104    | 11       | 74.1       | 7.02     | 2372  |         | 55       |        |
| P78371     | T-complex $\gamma$ 72.5233645  |            | 38         | 74     | 38       | 57.5       | 6.46     | 2184  |         | 38       |        |
| V9HWB4     | Epididymis 59.0214067          |            | 40         | 123    | 38       | 72.3       | 5.16     | 2564  |         | 40       |        |
| B4DNE0     | cDNA FLJ52:76.7088608          |            | 25         | 149    | 11       | 42.6       | 9.01     | 2094  |         | 25       |        |
| P05783     | Keratin, ty82.7906977          |            | 42         | 97     | 40       | 48         | 5.45     | 1889  |         | 42       |        |
| P22626     | Heterogenec73.6543909          |            | 32         | 114    | 10       | 37.4       | 8.95     | 2189  |         | 32       |        |
| P07355     | Annexin A2 83.1858407          |            | 44         | 90     | 44       | 38.6       | 7.75     | 1944  |         | 44       |        |
| Q9NR30     | Nucleolar F 58.109834          |            | 48         | 96     | 46       | 87.3       | 9.28     | 1205  |         | 48       |        |
| P38646     | Stress-70 $\gamma$ 62.4447717  |            | 38         | 85     | 38       | 73.6       | 6.16     | 2130  |         | 38       |        |
| P46013     | Proliferati32.9545455          |            | 72         | 98     | 72       | 358.5      | 9.45     | 1249  |         | 72       |        |
| Q3BDU5     | Prelamin-A/ 77.412731          |            | 46         | 88     | 2        | 55.6       | 6.65     | 1677  |         | 46       |        |
| Q06830     | Peroxioredo376.8844221         |            | 25         | 88     | 21       | 22.1       | 8.13     | 1173  |         | 25       |        |
| A8K3W9     | cDNA FLJ77:74.5856354          |            | 31         | 87     | 1        | 41.6       | 5.07     | 1823  |         | 31       |        |
| F5H5D3     | Tubulin al $\gamma$ 55.6840077 |            | 28         | 107    | 9        | 57.7       | 5.07     | 2522  |         | 28       |        |
| P68366     | Tubulin al $\gamma$ 58.7053571 |            | 27         | 105    | 9        | 49.9       | 5.06     | 2598  |         | 27       |        |
| AOA0S2Z491 | Nucleophosn 80.952381          |            | 23         | 84     | 5        | 32.6       | 4.78     | 1356  |         | 23       |        |
| P50990     | T-complex $\gamma$ 76.8248175  |            | 41         | 70     | 41       | 59.6       | 5.6      | 1525  |         | 41       |        |
| Q9Y490     | Talin-1 OS=28.5714286          |            | 49         | 70     | 49       | 269.6      | 6.07     | 1225  |         | 49       |        |
| Q08211     | ATP-depende40.9448819          |            | 46         | 75     | 46       | 140.9      | 6.84     | 1295  |         | 46       |        |
| Q59HH3     | Trifunction53.5372849          |            | 42         | 66     | 42       | 112.1      | 7.36     | 1386  |         | 42       |        |
| A4QPBO     | IQ motif cc 35.908268          |            | 47         | 61     | 47       | 189.2      | 6.48     | 955   |         | 47       |        |
| P04083     | Annexin A1 77.7456647          |            | 32         | 66     | 32       | 38.7       | 7.02     | 1445  |         | 32       |        |
| P14625     | Endoplasmir47.3225405          |            | 38         | 66     | 36       | 92.4       | 4.84     | 1375  |         | 38       |        |
| V9HW31     | ATP synthas61.6257089          |            | 24         | 56     | 24       | 56.5       | 5.4      | 1572  |         | 24       |        |
| P08729     | Keratin, ty73.1343284          |            | 40         | 77     | 31       | 51.4       | 5.48     | 1468  |         | 40       |        |
| V9HW37     | Epididymis 72.8280961          |            | 34         | 66     | 33       | 59.6       | 5.66     | 952   |         | 34       |        |
| Q61BN1     | HNRPK prote67.0258621          |            | 28         | 75     | 2        | 51         | 5.33     | 1295  |         | 28       |        |
| E5KNY5     | Leucine-ric36.8723099          |            | 46         | 68     | 46       | 157.8      | 6.13     | 1186  |         | 46       |        |
| B4DH02     | cDNA FLJ50:52.9761905          |            | 39         | 64     | 37       | 94.3       | 5.19     | 1259  |         | 39       |        |
| P23246     | Splicing f:51.0608204          |            | 39         | 61     | 38       | 76.1       | 9.44     | 1147  |         | 39       |        |
| P11586     | C-1-tetrahy53.0481283          |            | 45         | 72     | 44       | 101.5      | 7.3      | 1057  |         | 45       |        |
| P30101     | Protein di:65.7425743          |            | 32         | 73     | 24       | 56.7       | 6.35     | 1452  |         | 32       |        |
| AOA140VJQ2 | Testicular 83.011583           |            | 19         | 65     | 1        | 28.4       | 4.72     | 1151  |         | 19       |        |
| P49411     | Elongation 65.9292035          |            | 29         | 58     | 29       | 49.5       | 7.61     | 910   |         | 29       |        |

|            |                                    |    |    |    |       |       |      |    |
|------------|------------------------------------|----|----|----|-------|-------|------|----|
| P11388     | DNA topoisomerase 32.8543436       | 42 | 61 | 35 | 174.3 | 8.72  | 988  | 42 |
| O60506     | Heterogeneous 50.0802568           | 31 | 55 | 22 | 69.6  | 8.59  | 862  | 31 |
| B4DUQ1     | cDNA FLJ54865.3758542              | 28 | 72 | 2  | 48.5  | 5.92  | 1281 | 28 |
| P52272     | Heterogeneous 58.3561644           | 38 | 68 | 21 | 77.5  | 8.7   | 1336 | 38 |
| Q53HV2     | Chaperonin 77.5322284              | 34 | 63 | 34 | 59.3  | 7.65  | 1203 | 34 |
| P36578     | 60S ribosomal 57.3770492           | 31 | 81 | 31 | 47.7  | 11.06 | 1318 | 31 |
| P02786     | Transferrin 52.6315789             | 35 | 60 | 35 | 84.8  | 6.61  | 1170 | 35 |
| J9R021     | Eukaryotic 43.4153401              | 58 | 85 | 58 | 166.4 | 6.79  | 998  | 58 |
| P62081     | 40S ribosomal 70.1030928           | 19 | 56 | 19 | 22.1  | 10.1  | 571  | 19 |
| P33991     | DNA replication 43.9165701         | 31 | 45 | 31 | 96.5  | 6.74  | 969  | 31 |
| P14866     | Heterogeneous 62.6485569           | 28 | 58 | 27 | 64.1  | 8.22  | 922  | 28 |
| P09874     | Poly [ADP-ribose] 53.2544379       | 40 | 63 | 40 | 113   | 8.88  | 884  | 40 |
| A0A024RAZ7 | Heterogeneous 68.0107527           | 26 | 82 | 22 | 38.7  | 9.13  | 1112 | 26 |
| P17987     | T-complex protein 61.5107914       | 32 | 62 | 32 | 60.3  | 6.11  | 1625 | 32 |
| P50991     | T-complex protein 73.0983302       | 32 | 63 | 31 | 57.9  | 7.83  | 1243 | 32 |
| Q13509     | Tubulin beta 36.6666667            | 20 | 96 | 2  | 50.4  | 4.93  | 2036 | 20 |
| P12270     | Nucleoprotein 27.592044            | 52 | 64 | 52 | 267.1 | 5.02  | 883  | 52 |
| A8K486     | Peptidyl-protein 90.3030303        | 18 | 96 | 17 | 18    | 6.9   | 1630 | 18 |
| A8K7F6     | cDNA FLJ78261.0837438              | 26 | 54 | 4  | 46.1  | 5.48  | 1439 | 26 |
| A0A0D9SF53 | ATP-dependent 56.0709413           | 40 | 67 | 40 | 81.4  | 8.07  | 1143 | 40 |
| O43707     | Alpha-actinin 47.4204171           | 35 | 67 | 24 | 104.8 | 5.44  | 1267 | 35 |
| Q04695     | Keratin, type 80.5555556           | 38 | 69 | 20 | 48.1  | 5.02  | 1402 | 38 |
| G8JLB6     | Heterogeneous 46.8220339           | 21 | 54 | 16 | 51.2  | 6.8   | 1487 | 21 |
| A0A024R8S5 | Protein disulfide 59.0551181       | 33 | 64 | 33 | 57.1  | 4.87  | 1157 | 33 |
| P67936     | Tropomyosin 81.4516129             | 31 | 60 | 17 | 28.5  | 4.69  | 1073 | 31 |
| P00338     | L-lactate dehydrogenase 74.0963855 | 26 | 55 | 24 | 36.7  | 8.27  | 1158 | 26 |
| P49915     | GMP synthase 61.6161616            | 30 | 46 | 30 | 76.7  | 6.87  | 568  | 30 |
| P00966     | Argininosuccinate 69.1747573       | 27 | 61 | 27 | 46.5  | 8.02  | 807  | 27 |
| P25705     | ATP synthase 58.7703436            | 36 | 71 | 36 | 59.7  | 9.13  | 1490 | 36 |
| P58107     | Epiplakin 34.0471513               | 38 | 50 | 34 | 555.3 | 5.6   | 856  | 38 |
| Q6FHU2     | Phosphoglycolate 77.5590551        | 21 | 62 | 21 | 28.8  | 7.18  | 1016 | 21 |
| P39023     | 60S ribosomal 55.8312655           | 29 | 65 | 29 | 46.1  | 10.18 | 853  | 29 |
| A0A0S2Z4Z9 | Non-POU domain 70.2760085          | 37 | 63 | 35 | 54.2  | 8.95  | 1109 | 37 |
| P12268     | Inosine-5'-phosphate 53.6964981    | 24 | 44 | 23 | 55.8  | 6.9   | 898  | 24 |
| Q16658     | Fascin 0S=1 64.0973631             | 32 | 57 | 32 | 54.5  | 7.24  | 1175 | 32 |
| I6L957     | HNRNPA2B1 protein 62.248996        | 23 | 72 | 1  | 28.4  | 4.86  | 795  | 23 |
| Q59H77     | T-complex protein 56.6724437       | 33 | 69 | 33 | 63.5  | 6.43  | 1163 | 33 |
| O60664     | Perilipin-1 75.3456221             | 21 | 33 | 21 | 47    | 5.44  | 855  | 21 |
| B2R6J2     | cDNA, FLJ962.6279863               | 42 | 76 | 26 | 69.4  | 6.27  | 953  | 42 |
| P13010     | X-ray repair protein 39.0710383    | 27 | 58 | 5  | 82.7  | 5.81  | 662  | 27 |
| A0A087WWU8 | Tropomyosin 81.0572687             | 29 | 62 | 12 | 26.4  | 4.78  | 1155 | 29 |
| P27708     | CAD protein 28.1797753             | 44 | 56 | 42 | 242.8 | 6.46  | 755  | 44 |
| P31939     | Bifunctional 53.5472973            | 26 | 45 | 26 | 64.6  | 6.71  | 827  | 26 |
| E7EVA0     | Microtubule 16.4127122             | 29 | 52 | 28 | 245.3 | 6.23  | 808  | 29 |
| O75643     | U5 small nuclear 25.4681648        | 41 | 48 | 41 | 244.4 | 6.06  | 883  | 41 |
| P05023     | Sodium/potassium 38.514174         | 36 | 56 | 36 | 112.8 | 5.49  | 1010 | 36 |
| B4E0X8     | cDNA FLJ6156.1208267               | 34 | 59 | 27 | 66.2  | 7.56  | 1008 | 34 |
| Q16881     | Thioredoxin 53.9291217             | 24 | 40 | 23 | 70.9  | 7.39  | 903  | 24 |
| A0A024RCN6 | Valyl-tRNA 36.5506329              | 34 | 49 | 34 | 140.4 | 7.59  | 824  | 34 |
| A0A024R9W5 | HECT, UBA domain 13.648834         | 37 | 47 | 37 | 481.6 | 5.22  | 762  | 37 |
| P29401     | Transketolase 51.2038523           | 30 | 60 | 30 | 67.8  | 7.66  | 758  | 30 |
| P40227     | T-complex protein 51.7890772       | 28 | 55 | 11 | 58    | 6.68  | 1014 | 28 |
| A2RUM7     | Ribosomal protein 59.5959596       | 24 | 59 | 24 | 34.3  | 9.72  | 949  | 24 |
| A0A024RDY0 | RAN binding 41.7502279             | 32 | 46 | 32 | 123.6 | 4.94  | 876  | 32 |
| Q4LE36     | ACLY variant 38.6103782            | 37 | 55 | 37 | 124.5 | 8.03  | 1077 | 37 |
| Q6P2Q9     | Pre-mRNA-protein 21.7558887        | 39 | 50 | 39 | 273.4 | 8.84  | 708  | 39 |
| A3R0T8     | Histone 1, 39.7260274              | 18 | 93 | 4  | 21.9  | 11.03 | 2055 | 18 |
| B2RDX5     | cDNA, FLJ9645.1476793              | 35 | 49 | 1  | 82.1  | 6.67  | 677  | 35 |
| A8MXP9     | Matrin-3 0S=44.5810056             | 34 | 60 | 34 | 99.9  | 6.04  | 598  | 34 |
| P26639     | Threonine--ase 45.9197787          | 35 | 49 | 1  | 83.4  | 6.67  | 697  | 35 |
| B5BUE6     | ATP-dependent 52.1172638           | 35 | 58 | 26 | 69.1  | 8.92  | 850  | 35 |
| P05387     | 60S acidic phosphoprotein 100      | 12 | 32 | 11 | 11.7  | 4.54  | 897  | 12 |
| O43175     | D-3-phosphoglycerate 57.7861163    | 31 | 48 | 31 | 56.6  | 6.71  | 1047 | 31 |
| P49588     | Alanine--transferase 37.5          | 30 | 44 | 30 | 106.7 | 5.53  | 849  | 30 |
| B4DJ30     | cDNA FLJ6142.1105528               | 30 | 55 | 30 | 112.9 | 6.06  | 741  | 30 |
| P63104     | 14-3-3 protein 71.4285714          | 25 | 51 | 19 | 27.7  | 4.79  | 944  | 25 |
| P12956     | X-ray repair protein 50.2463054    | 28 | 51 | 28 | 69.8  | 6.64  | 994  | 28 |
| P62805     | Histone H4 63.1067961              | 17 | 85 | 17 | 11.4  | 11.36 | 1397 | 17 |
| E9KL35     | Epididymis 80.126183               | 22 | 40 | 22 | 35.1  | 7.69  | 965  | 22 |
| E9KL44     | Epididymis 53.0799476              | 29 | 42 | 29 | 82.9  | 9.04  | 682  | 29 |
| A0A024R4K3 | Malate dehydrogenase 69.5266272    | 23 | 37 | 23 | 35.5  | 8.68  | 992  | 23 |
| P62701     | 40S ribosomal 67.6806084           | 25 | 65 | 25 | 29.6  | 10.15 | 900  | 25 |
| Q08J23     | tRNA (cytosine) 52.672751          | 31 | 43 | 31 | 86.4  | 6.77  | 749  | 31 |

|            |             |             |    |    |    |       |       |      |    |
|------------|-------------|-------------|----|----|----|-------|-------|------|----|
| 043390     | Heterogene  | 44.8657188  | 32 | 52 | 23 | 70.9  | 8.13  | 888  | 32 |
| Q99497     | Protein DJ- | 79.3650794  | 18 | 38 | 18 | 19.9  | 6.79  | 539  | 18 |
| E1NZA1     | Peroxisome  | 20.891052   | 41 | 50 | 41 | 292.6 | 7.43  | 738  | 41 |
| Q4LE64     | NUMA1 vari  | 27.7227723  | 41 | 48 | 41 | 238.7 | 5.81  | 789  | 41 |
| Q13263     | Transcripti | 45.3892216  | 22 | 43 | 22 | 88.5  | 5.77  | 717  | 22 |
| P16403     | Histone H1. | 45.0704225  | 18 | 93 | 4  | 21.4  | 10.93 | 2066 | 18 |
| B3KT93     | Polyadenyl  | 54.8742138  | 35 | 58 | 14 | 70.6  | 9.52  | 984  | 35 |
| P61247     | 40S riboso  | 70.8333333  | 28 | 59 | 13 | 29.9  | 9.73  | 964  | 28 |
| Q53T09     | Putative ur | 43.3098592  | 23 | 52 | 1  | 64.2  | 6     | 584  | 23 |
| Q7KZF4     | Staphylococ | 47.5824176  | 33 | 43 | 33 | 101.9 | 7.17  | 610  | 33 |
| Q4LE58     | eIF4G1 vari | 26.7241379  | 35 | 58 | 35 | 178   | 5.31  | 793  | 35 |
| AOA0S2Z4A5 | DNA helica  | 48.2614743  | 27 | 45 | 27 | 81.3  | 6.46  | 842  | 27 |
| AOA140VJT8 | Testicular  | 61.6052061  | 19 | 27 | 19 | 49.9  | 4.82  | 770  | 19 |
| P21796     | Voltage-dep | 79.5053004  | 22 | 45 | 21 | 30.8  | 8.54  | 1076 | 22 |
| B5MDF5     | GTP-binding | 53.6480687  | 20 | 55 | 20 | 26.2  | 7.01  | 924  | 20 |
| P23528     | Cofilin-1 ( | 86.746988   | 16 | 46 | 11 | 18.5  | 8.09  | 1050 | 16 |
| AOA0S2Z4J1 | Hydroxyster | 40.7608696  | 21 | 31 | 21 | 79.6  | 8.84  | 840  | 21 |
| P38159     | RNA-binding | 62.6598465  | 35 | 59 | 35 | 42.3  | 10.05 | 786  | 35 |
| I3L504     | Eukaryotic  | 60.2150538  | 14 | 43 | 14 | 20.5  | 5.25  | 847  | 14 |
| Q9UMS4     | Pre-mRNA-pr | 62.8968254  | 22 | 41 | 22 | 55.1  | 6.61  | 372  | 22 |
| Q9NZM1     | Myoferlin ( | 25.0363901  | 39 | 49 | 39 | 234.6 | 6.18  | 450  | 39 |
| P07737     | Profilin-1  | 97.1428571  | 18 | 45 | 18 | 15    | 8.27  | 1100 | 18 |
| J3KN67     | Tropomyosir | 57.8947368  | 23 | 52 | 4  | 33.2  | 4.77  | 932  | 23 |
| P31040     | Succinate c | 39.9096386  | 20 | 37 | 20 | 72.6  | 7.39  | 576  | 20 |
| P41091     | Eukaryotic  | 50.4237288  | 19 | 43 | 19 | 51.1  | 8.4   | 743  | 19 |
| AOA024RAC5 | Regulator c | 45.0191571  | 20 | 40 | 20 | 56    | 8.78  | 1035 | 20 |
| V9HWC9     | Superoxide  | 84.4155844  | 9  | 25 | 9  | 15.9  | 6.13  | 480  | 9  |
| Q53SS8     | Epididymis  | 76.6853933  | 17 | 40 | 12 | 37.5  | 7.09  | 839  | 17 |
| P23396     | 40S riboso  | 84.3621399  | 27 | 57 | 27 | 26.7  | 9.66  | 828  | 27 |
| P22234     | Multifuncti | 43.7647059  | 22 | 40 | 22 | 47    | 7.23  | 912  | 22 |
| Q01813     | ATP-depend  | 42.7295918  | 27 | 34 | 25 | 85.5  | 7.55  | 636  | 27 |
| Q15393     | Splicing f  | 32.7033689  | 31 | 42 | 31 | 135.5 | 5.26  | 651  | 31 |
| Q12906     | Interleukir | 42.9530201  | 24 | 38 | 24 | 95.3  | 8.76  | 477  | 24 |
| Q9UQ80     | Proliferati | 60.1522843  | 26 | 43 | 26 | 43.8  | 6.55  | 684  | 26 |
| AOA024R904 | Calcyclin   | 84.6491228  | 23 | 41 | 23 | 26.2  | 8.25  | 569  | 23 |
| BOYJ88     | Radixin OS- | 55.9176672  | 37 | 59 | 18 | 68.5  | 6.37  | 739  | 37 |
| Q15029     | 116 kDa U5  | 39.9176955  | 32 | 37 | 31 | 109.4 | 5     | 642  | 32 |
| J3KSZO     | Eukaryotic  | 68.2608696  | 19 | 40 | 2  | 26.8  | 7.88  | 798  | 19 |
| P15924     | Desmoplakir | 21.595263   | 48 | 53 | 48 | 331.6 | 6.81  | 609  | 48 |
| B4DLV7     | Rab GDP di  | 57.6837416  | 23 | 42 | 16 | 51.1  | 8.18  | 486  | 23 |
| P49736     | DNA replic  | 36.0619469  | 26 | 39 | 26 | 101.8 | 5.52  | 785  | 26 |
| AOA024RDS1 | Heat shock  | 39.2773893  | 26 | 40 | 22 | 96.8  | 5.39  | 716  | 26 |
| O75533     | Splicing f  | 32.8220859  | 31 | 46 | 31 | 145.7 | 7.09  | 498  | 31 |
| AOA024RBS2 | 60S acidic  | 63.7223975  | 19 | 31 | 19 | 34.3  | 5.97  | 658  | 19 |
| O15067     | Phosphorib  | 28.1763827  | 29 | 42 | 29 | 144.6 | 5.76  | 621  | 29 |
| B2RB23     | cDNA, FLJ9  | 67.0025189  | 22 | 32 | 22 | 42    | 8.25  | 544  | 22 |
| P11413     | Glucose-6-P | 51.6504854  | 23 | 41 | 23 | 59.2  | 6.84  | 568  | 23 |
| A8K690     | cDNA FLJ7   | 651.1970534 | 23 | 39 | 23 | 62.6  | 6.8   | 519  | 23 |
| AOA087WUZ3 | Spectrin b  | 15.8072697  | 25 | 34 | 25 | 274.7 | 5.57  | 657  | 25 |
| J3KPF3     | 4F2 cell-st | 34.548336   | 19 | 34 | 19 | 68.1  | 5.05  | 602  | 19 |
| P62917     | 60S riboso  | 53.6964981  | 19 | 43 | 19 | 28    | 11.03 | 617  | 19 |
| Q6FI13     | Histone H2  | 66.1538462  | 10 | 73 | 2  | 14.1  | 10.9  | 986  | 10 |
| V9HW88     | Calreticuli | 45.323741   | 22 | 49 | 22 | 48.1  | 4.44  | 741  | 22 |
| Q16719     | Kynurenina  | 41.5053763  | 14 | 30 | 14 | 52.3  | 7.03  | 617  | 14 |
| Q59F66     | DEAD box p  | 43.6906377  | 34 | 55 | 25 | 81    | 7.93  | 976  | 34 |
| Q5JR94     | 40S riboso  | 62.9807692  | 19 | 41 | 19 | 24.2  | 10.32 | 704  | 19 |
| P54136     | Arginine--  | 151.2121212 | 29 | 35 | 29 | 75.3  | 6.68  | 630  | 29 |
| Q4W4Y1     | Dopamine r  | 44.8156682  | 30 | 36 | 30 | 96    | 6.52  | 449  | 30 |
| V9HW77     | Epididymis  | 57.2178478  | 19 | 37 | 19 | 42.6  | 5.59  | 580  | 19 |
| V9HWD6     | Epididymis  | 64.6341463  | 22 | 51 | 13 | 28.1  | 4.83  | 905  | 22 |
| Q15691     | Microtubul  | 71.2686567  | 16 | 31 | 16 | 30    | 5.14  | 621  | 16 |
| Q8NC51     | Plasminoger | 45.0980392  | 19 | 48 | 19 | 44.9  | 8.65  | 840  | 19 |
| Q5QNW6     | Histone H2  | 67.4603175  | 13 | 97 | 1  | 13.9  | 10.32 | 2380 | 13 |
| P04843     | Dolichyl-di | 46.9522241  | 23 | 37 | 23 | 68.5  | 6.38  | 852  | 23 |
| AOA0S2Z4I0 | Hydroxyster | 79.6934866  | 15 | 25 | 15 | 26.9  | 7.78  | 615  | 15 |
| AOA024QZZ7 | Histone H2  | 67.4603175  | 13 | 96 | 1  | 13.9  | 10.32 | 2390 | 13 |
| P23526     | Adenosylho  | 51.8518519  | 24 | 35 | 23 | 47.7  | 6.34  | 603  | 24 |
| Q13838     | Spliceosome | 55.8411215  | 19 | 34 | 8  | 49    | 5.67  | 820  | 19 |
| Q9Y4L1     | Hypoxia up- | 32.3323323  | 24 | 32 | 24 | 111.3 | 5.22  | 514  | 24 |
| P53621     | Coatomer s  | 30.1470588  | 28 | 37 | 28 | 138.3 | 7.66  | 463  | 28 |
| P51991     | Heterogene  | 45.5026455  | 20 | 50 | 4  | 39.6  | 9.01  | 451  | 20 |
| Q16778     | Histone H2  | 67.4603175  | 12 | 87 | 0  | 13.9  | 10.32 | 2244 | 12 |
| P34897     | Serine hydi | 49.2063492  | 22 | 31 | 21 | 56    | 8.53  | 619  | 22 |

|            |              |             |    |    |    |       |       |      |    |
|------------|--------------|-------------|----|----|----|-------|-------|------|----|
| P25398     | 40S ribosom  | 81.8181818  | 14 | 39 | 14 | 14.5  | 7.21  | 936  | 14 |
| P33778     | Histone H2f  | 67.4603175  | 12 | 87 | 1  | 13.9  | 10.32 | 2208 | 12 |
| A8K9K6     | cDNA FLJ76   | 43.9393939  | 19 | 30 | 19 | 65.9  | 9.23  | 846  | 19 |
| B5BUB1     | RuvB-like 1  | 56.1403509  | 20 | 30 | 20 | 50.2  | 6.42  | 605  | 20 |
| Q9HBB3     | 60S ribosom  | 47.0588235  | 19 | 58 | 19 | 32.9  | 10.58 | 765  | 19 |
| A8K3H8     | cDNA FLJ77   | 36.5025467  | 18 | 27 | 14 | 65.3  | 5.11  | 565  | 18 |
| Q5TCU8     | Tropomyosin  | 42.5465839  | 20 | 39 | 1  | 36.7  | 4.78  | 695  | 20 |
| Q1ELT0     | MHC Class 1  | 56.7123288  | 18 | 36 | 12 | 41    | 6.9   | 629  | 18 |
| P13804     | Electron tr  | 57.3573574  | 19 | 29 | 19 | 35.1  | 8.38  | 548  | 19 |
| V9HW43     | Epididymis   | 86.8292683  | 14 | 36 | 14 | 22.8  | 6.4   | 844  | 14 |
| I6L9F7     | Histone H2f  | 61.5942029  | 13 | 95 | 1  | 15.1  | 10.24 | 2336 | 13 |
| Q13200     | 26S proteas  | 36.2334802  | 23 | 36 | 23 | 100.1 | 5.2   | 691  | 23 |
| B2RBR9     | cDNA, FLJ9   | 36.8721461  | 23 | 41 | 23 | 97.1  | 4.78  | 646  | 23 |
| Q9BUF5     | Tubulin beta | 41.0313901  | 15 | 86 | 6  | 49.8  | 4.88  | 1395 | 15 |
| V9HW25     | Epididymis   | 48.2394366  | 21 | 41 | 2  | 33    | 4.67  | 660  | 21 |
| O60814     | Histone H2f  | 67.4603175  | 13 | 95 | 1  | 13.9  | 10.32 | 2367 | 13 |
| P62424     | 60S ribosom  | 53.0075188  | 23 | 49 | 23 | 30    | 10.61 | 719  | 23 |
| V9HWK2     | Epididymis   | 25.9259259  | 23 | 31 | 23 | 123.7 | 5.66  | 659  | 23 |
| Q86UP2     | Kinectin O   | 29.1083272  | 31 | 37 | 31 | 156.2 | 5.64  | 449  | 31 |
| AOA0U1RRM4 | Polypyrimic  | 40.6462585  | 16 | 48 | 13 | 62.4  | 9.1   | 800  | 16 |
| Q05639     | Elongation   | 45.3563715  | 16 | 92 | 2  | 50.4  | 9.03  | 1568 | 16 |
| Q16577     | Elongation   | 41.2060302  | 21 | 62 | 11 | 42.8  | 8.34  | 1010 | 21 |
| AOA087WTP3 | Far upstre   | 40.2250352  | 27 | 43 | 22 | 73    | 7.71  | 647  | 27 |
| P20700     | Lamin-B1 O   | 53.9249147  | 28 | 38 | 22 | 66.4  | 5.16  | 482  | 28 |
| O00299     | Chloride ir  | 67.6348548  | 16 | 24 | 16 | 26.9  | 5.17  | 637  | 16 |
| Q9Y3F4     | Serine-thre  | 61.1428571  | 15 | 26 | 15 | 38.4  | 5.12  | 607  | 15 |
| AOA087WUT6 | Eukaryotic   | 23.1147541  | 24 | 37 | 24 | 138.6 | 5.58  | 445  | 24 |
| P27695     | DNA-(apurir  | 70.754717   | 17 | 28 | 17 | 35.5  | 8.12  | 465  | 17 |
| P23921     | Ribonucleos  | 34.9747475  | 22 | 31 | 22 | 90    | 7.15  | 529  | 22 |
| AOA0KOK1K4 | Proteasome   | 60.8870968  | 14 | 28 | 14 | 27.9  | 8.46  | 686  | 14 |
| Q16891     | MICOS compl  | 35.0923483  | 20 | 31 | 20 | 83.6  | 6.48  | 591  | 20 |
| P41250     | Glycine--t   | 33.5588633  | 17 | 28 | 17 | 83.1  | 7.03  | 487  | 17 |
| P09972     | Fructose-bi  | 42.032967   | 13 | 36 | 8  | 39.4  | 6.87  | 720  | 13 |
| P12814     | Alpha-actin  | 34.9775785  | 26 | 43 | 15 | 103   | 5.41  | 887  | 26 |
| P55786     | Puromycin-   | 30.1414581  | 23 | 30 | 23 | 103.2 | 5.72  | 579  | 23 |
| P31930     | Cytochrome   | 49.1666667  | 16 | 27 | 15 | 52.6  | 6.37  | 538  | 16 |
| P09429     | High mobili  | 56.744186   | 18 | 48 | 13 | 24.9  | 5.74  | 623  | 18 |
| P05556     | Integrin be  | 36.9674185  | 24 | 34 | 24 | 88.4  | 5.39  | 602  | 24 |
| Q8N257     | Histone H2f  | 61.9047619  | 11 | 81 | 2  | 13.9  | 10.32 | 2182 | 11 |
| B4DDB6     | Heterogene   | 42.9775281  | 17 | 42 | 1  | 37    | 8.31  | 436  | 17 |
| AOA0A0MSS8 | Aldo-keto r  | 51.7027864  | 14 | 27 | 6  | 36.8  | 7.94  | 453  | 14 |
| Q14103     | Heterogene   | 48.1690141  | 20 | 31 | 17 | 38.4  | 7.81  | 622  | 20 |
| P49792     | E3 SUMO-pr   | 15.4156328  | 36 | 40 | 36 | 358   | 6.2   | 596  | 36 |
| F8VZX2     | Poly(rC)-b   | 66.3551402  | 14 | 35 | 1  | 33.8  | 8.24  | 711  | 14 |
| Q15084     | Protein di   | 40.6818182  | 16 | 30 | 16 | 48.1  | 5.08  | 723  | 16 |
| Q9Y5B9     | FACT compl   | 23.591213   | 22 | 28 | 22 | 119.8 | 5.66  | 523  | 22 |
| Q9BWD1     | Acetyl-CoA   | 60.9571788  | 13 | 20 | 13 | 41.3  | 6.92  | 377  | 13 |
| P55060     | Exportin-2   | 25.0257467  | 25 | 36 | 25 | 110.3 | 5.77  | 662  | 25 |
| P26641     | Elongation   | 44.6224256  | 17 | 44 | 17 | 50.1  | 6.67  | 872  | 17 |
| O75694     | Nuclear por  | 23.364486   | 23 | 27 | 23 | 155.1 | 6.16  | 508  | 23 |
| B7ZLZ7     | Structural   | 32.8320802  | 32 | 40 | 32 | 135.6 | 8.46  | 547  | 32 |
| P38919     | Eukaryotic   | 46.2287105  | 20 | 33 | 16 | 46.8  | 6.73  | 694  | 20 |
| Q9UHD1     | Cysteine ar  | 53.0120482  | 16 | 28 | 16 | 37.5  | 7.87  | 412  | 16 |
| P15121     | Aldose red   | 66.1392405  | 17 | 34 | 16 | 35.8  | 6.98  | 414  | 17 |
| AOA0C4DG17 | 40S ribosom  | 61.6666667  | 13 | 23 | 13 | 33.3  | 4.87  | 537  | 13 |
| P30048     | Thioredoxin  | 43.359375   | 10 | 28 | 10 | 27.7  | 7.78  | 472  | 10 |
| P49321     | Nuclear aut  | 35.0253807  | 16 | 27 | 16 | 85.2  | 4.3   | 494  | 16 |
| P12004     | Proliferati  | 73.1800766  | 15 | 27 | 15 | 28.8  | 4.69  | 517  | 15 |
| P42167     | Lamina-ass   | 48.0176211  | 18 | 29 | 8  | 50.6  | 9.38  | 636  | 18 |
| V9HWC7     | Epididymis   | 74.5535714  | 18 | 32 | 18 | 25    | 6.38  | 518  | 18 |
| F4ZW62     | NF45 OS=H    | 52.8205128  | 16 | 27 | 16 | 43    | 5.26  | 751  | 16 |
| P67809     | Nuclease-s   | 69.1358025  | 14 | 42 | 8  | 35.9  | 9.88  | 328  | 14 |
| AOA024RBH2 | Cytoskelet   | 48.3388704  | 21 | 24 | 21 | 66    | 5.92  | 678  | 21 |
| Q15366     | Poly(rC)-b   | 56.4383562  | 14 | 35 | 1  | 38.6  | 6.79  | 711  | 14 |
| Q00796     | Sorbitol de  | 63.5854342  | 19 | 31 | 19 | 38.3  | 7.97  | 433  | 19 |
| P05141     | ADP/ATP tr   | 64.0939597  | 27 | 43 | 12 | 32.8  | 9.69  | 604  | 27 |
| P22695     | Cytochrome   | 37.9690949  | 16 | 27 | 16 | 48.4  | 8.63  | 498  | 16 |
| P52789     | Hexokinase   | -30.0981461 | 23 | 31 | 21 | 102.3 | 6.05  | 764  | 23 |
| B2R7C5     | DNA helica   | 35.8910891  | 26 | 32 | 26 | 91    | 5.77  | 512  | 26 |
| BOAZQ4     | Structural   | 28.0197206  | 27 | 30 | 27 | 141.4 | 7.18  | 576  | 27 |
| AOA087X2I1 | 26S protea   | 63.2754342  | 24 | 31 | 24 | 45.8  | 7.78  | 513  | 24 |
| Q5U077     | L-lactate c  | 50          | 18 | 34 | 16 | 36.6  | 6.05  | 669  | 18 |
| Q9Y310     | tRNA-splici  | 41.1881188  | 14 | 26 | 14 | 55.2  | 7.23  | 343  | 14 |

|            |             |             |    |    |    |       |       |      |    |
|------------|-------------|-------------|----|----|----|-------|-------|------|----|
| Q13707     | ACTA2 prote | 50.9090909  | 15 | 98 | 5  | 36.8  | 5.35  | 1725 | 15 |
| P23284     | Peptidyl-pr | 67.1296296  | 16 | 34 | 15 | 23.7  | 9.41  | 409  | 16 |
| B2RDY9     | Adenylyl cy | 42.5263158  | 18 | 34 | 18 | 51.6  | 8.22  | 341  | 18 |
| P32004     | Neural cell | 22.2752586  | 20 | 30 | 20 | 139.9 | 6.24  | 704  | 20 |
| Q16576     | Histone-bir | 54.8235294  | 16 | 30 | 10 | 47.8  | 5.05  | 347  | 16 |
| AOA024RBB7 | Nucleosome  | 43.7340153  | 10 | 18 | 9  | 45.3  | 4.46  | 538  | 10 |
| P27348     | 14-3-3 prot | 68.5714286  | 23 | 44 | 17 | 27.7  | 4.78  | 679  | 23 |
| 075534     | Cold shock  | 35.7142857  | 27 | 36 | 27 | 88.8  | 6.25  | 565  | 27 |
| Q619V5     | SLC25A6 prc | 60.4026846  | 23 | 42 | 8  | 32.8  | 9.74  | 626  | 23 |
| P36871     | Phosphogluc | 46.975089   | 24 | 30 | 24 | 61.4  | 6.76  | 486  | 24 |
| E9KL48     | Epididymis  | 32.9749104  | 16 | 24 | 10 | 61.4  | 7.8   | 568  | 16 |
| Q9H4A4     | Aminopeptic | 44.9230769  | 22 | 31 | 22 | 72.5  | 5.74  | 554  | 22 |
| Q15717     | ELAV-like p | 60.4294479  | 17 | 31 | 17 | 36.1  | 9.17  | 366  | 17 |
| P05198     | Eukaryotic  | 55.5555556  | 21 | 33 | 21 | 36.1  | 5.08  | 513  | 21 |
| Q08AJ9     | Histone H2/ | 66.1538462  | 9  | 60 | 2  | 14.1  | 11.05 | 980  | 9  |
| Q15019     | Septin-2 O  | 66.7590028  | 18 | 24 | 18 | 41.5  | 6.6   | 365  | 18 |
| AOA140VJY2 | Testicular  | 30.3977273  | 20 | 30 | 19 | 80.1  | 8.21  | 676  | 20 |
| A8K401     | Prohibitin, | 71.6911765  | 21 | 29 | 21 | 29.8  | 5.76  | 603  | 21 |
| 015371     | Eukaryotic  | 43.0656934  | 16 | 22 | 16 | 63.9  | 6.05  | 484  | 16 |
| AOA1C7CYX9 | Dihydropyri | 39.7341211  | 15 | 23 | 15 | 73.5  | 6.35  | 543  | 15 |
| P46060     | Ran GTPase- | 39.3526405  | 18 | 24 | 18 | 63.5  | 4.68  | 638  | 18 |
| Q13283     | Ras GTPase- | 40.9871245  | 16 | 34 | 15 | 52.1  | 5.52  | 476  | 16 |
| Q5VXV3     | SET OS=Homc | 40          | 13 | 33 | 13 | 33.5  | 4.32  | 376  | 13 |
| D9IAI1     | Epididymis  | 81.8181818  | 11 | 21 | 11 | 21    | 7.53  | 305  | 11 |
| P50454     | Serpin HI ( | 40.430622   | 13 | 19 | 13 | 46.4  | 8.69  | 469  | 13 |
| A8K7D9     | Importin st | 41.5879017  | 16 | 36 | 16 | 57.8  | 5.4   | 862  | 16 |
| P62258     | 14-3-3 prot | 76.4705882  | 17 | 34 | 15 | 29.2  | 4.74  | 444  | 17 |
| Q13435     | Splicing fe | 38.3240223  | 27 | 33 | 27 | 100.2 | 5.67  | 277  | 27 |
| Q14683     | Structural  | 30.5758313  | 31 | 36 | 31 | 143.1 | 7.64  | 476  | 31 |
| 043143     | Pre-mRNA-s  | 31.4465409  | 26 | 36 | 26 | 90.9  | 7.46  | 453  | 26 |
| AOA024R056 | Guanine nuc | 66.1764706  | 13 | 18 | 8  | 37.4  | 6     | 481  | 13 |
| R4GNH3     | 26S protea  | 42.7895981  | 13 | 23 | 13 | 47.3  | 5.22  | 522  | 13 |
| P04264     | Keratin, t  | 40.8385093  | 20 | 25 | 17 | 66    | 8.12  | 597  | 20 |
| 075083     | WD repeat-  | 43.8943894  | 18 | 27 | 18 | 66.2  | 6.65  | 465  | 18 |
| 076021     | Ribosomal   | 146.3265306 | 24 | 40 | 24 | 54.9  | 10.13 | 553  | 24 |
| AOA140VJW5 | Testicular  | 54.0918164  | 22 | 28 | 22 | 57.1  | 6.55  | 744  | 22 |
| Q6FHX6     | Flap endom  | 45.5263158  | 15 | 27 | 15 | 42.6  | 8.62  | 393  | 15 |
| AOA0A6YYL6 | Protein RPI | 47.3684211  | 14 | 25 | 14 | 26.4  | 10.1  | 376  | 14 |
| Q53Z07     | NPC-A-16 O  | 72.3958333  | 13 | 27 | 13 | 21.9  | 9.95  | 440  | 13 |
| Q9NTJ3     | Structural  | 25.8540373  | 27 | 32 | 27 | 147.1 | 6.79  | 349  | 27 |
| P27635     | 60S ribosom | 66.3551402  | 19 | 32 | 19 | 24.6  | 10.08 | 486  | 19 |
| AOA140VK70 | Testis secr | 59.1224018  | 21 | 28 | 21 | 48.6  | 5.95  | 499  | 21 |
| Q8NE71     | ATP-binding | 28.7573964  | 21 | 29 | 20 | 95.9  | 6.8   | 425  | 21 |
| Q61Q30     | Polyadenyl  | 35.3030303  | 21 | 33 | 9  | 72.3  | 9.35  | 567  | 21 |
| A2A3R6     | 40S ribosom | 37.3493976  | 13 | 27 | 5  | 28.7  | 10.84 | 678  | 13 |
| P13667     | Protein di  | 41.3953488  | 26 | 40 | 26 | 72.9  | 5.07  | 518  | 26 |
| P80723     | Brain acid  | 76.2114537  | 13 | 38 | 13 | 22.7  | 4.63  | 394  | 13 |
| S4R3H4     | Apoptotic c | 19.7194076  | 19 | 27 | 19 | 145.4 | 6     | 575  | 19 |
| P42166     | Lamina-assc | 33.1412104  | 17 | 28 | 7  | 75.4  | 7.66  | 661  | 17 |
| Q9Y230     | RuvB-like   | 55.5075594  | 22 | 29 | 22 | 51.1  | 5.64  | 558  | 22 |
| P39687     | Acidic leuc | 38.1526104  | 17 | 33 | 12 | 28.6  | 4.09  | 585  | 17 |
| P17812     | CTP syntha  | 38.5786802  | 20 | 30 | 20 | 66.6  | 6.46  | 421  | 20 |
| Q08945     | FACT compl  | 28.9139633  | 18 | 27 | 18 | 81    | 6.87  | 361  | 18 |
| B7Z596     | Tropomyosir | 41.0909091  | 17 | 30 | 6  | 31.7  | 4.89  | 564  | 17 |
| Q96PK6     | RNA-binding | 32.735426   | 19 | 31 | 19 | 69.4  | 9.67  | 480  | 19 |
| Q5U0F4     | Eukaryotic  | 72.9230769  | 20 | 30 | 20 | 36.5  | 5.64  | 497  | 20 |
| P16152     | Carbonyl re | 60.6498195  | 15 | 23 | 15 | 30.4  | 8.32  | 618  | 15 |
| B2R5B6     | Histone H2/ | 65.3846154  | 8  | 40 | 1  | 14.1  | 10.9  | 609  | 8  |
| J3QQ67     | 60S ribosom | 52.6315789  | 13 | 35 | 13 | 21.8  | 11.72 | 638  | 13 |
| A1KYQ7     | Eukaryotic  | 27.0536692  | 24 | 34 | 24 | 105.3 | 5.68  | 644  | 24 |
| P27824     | Calnexin O  | 40.7094595  | 19 | 31 | 19 | 67.5  | 4.6   | 389  | 19 |
| Q15181     | Inorganic p | 62.6297578  | 12 | 24 | 12 | 32.6  | 5.86  | 377  | 12 |
| B2R5W2     | Heterogenec | 53.7931034  | 19 | 37 | 19 | 31.9  | 5.24  | 638  | 19 |
| 014980     | Exportin-1  | 28.4780579  | 22 | 26 | 22 | 123.3 | 6.06  | 474  | 22 |
| P27694     | Replicatio  | 41.7207792  | 18 | 27 | 18 | 68.1  | 7.21  | 403  | 18 |
| P07954     | Fumarate h  | 47.4509804  | 16 | 25 | 16 | 54.6  | 8.76  | 299  | 16 |
| B2RE46     | cDNA, FLJ9  | 24.088748   | 9  | 15 | 9  | 69.3  | 5.78  | 351  | 9  |
| P38606     | V-type prot | 32.73906    | 14 | 21 | 14 | 68.3  | 5.52  | 349  | 14 |
| P37802     | Transgelin  | 75.3768844  | 17 | 25 | 17 | 22.4  | 8.25  | 614  | 17 |
| P52788     | Spermine s  | 61.4754098  | 13 | 20 | 13 | 41.2  | 5.02  | 431  | 13 |
| P15880     | 40S ribosom | 52.9010239  | 18 | 37 | 18 | 31.3  | 10.24 | 497  | 18 |
| AOA024R4Q8 | Ribosomal p | 58.3333333  | 16 | 27 | 16 | 22.9  | 9.72  | 621  | 16 |
| 043242     | 26S proteas | 29.588015   | 14 | 21 | 14 | 60.9  | 8.44  | 493  | 14 |



|            |             |             |    |    |    |       |       |     |    |
|------------|-------------|-------------|----|----|----|-------|-------|-----|----|
| H0Y7A7     | Calmodulin  | 78.6096257  | 10 | 25 | 10 | 20.7  | 4.36  | 561 | 10 |
| P09382     | Galectin-1  | 76.2962963  | 12 | 24 | 12 | 14.7  | 5.5   | 576 | 12 |
| B5BUB5     | Autoantigen | 42.4019608  | 16 | 27 | 16 | 46.8  | 7.12  | 467 | 16 |
| P26373     | 60S ribosom | 54.028436   | 15 | 36 | 15 | 24.2  | 11.65 | 769 | 15 |
| Q9Y617     | Phosphoseri | 64.0540541  | 16 | 24 | 16 | 40.4  | 7.66  | 526 | 16 |
| Q32Q12     | Nucleoside  | 59.5890411  | 13 | 36 | 13 | 32.6  | 8.48  | 526 | 13 |
| P62277     | 40S ribosom | 50.9933775  | 11 | 26 | 11 | 17.2  | 10.54 | 417 | 11 |
| A0A024R7T3 | Heterogenec | 30.3614458  | 9  | 23 | 7  | 45.6  | 5.58  | 680 | 9  |
| P29692     | Elongation  | 55.8718861  | 14 | 27 | 5  | 31.1  | 5.01  | 686 | 14 |
| B4DRM3     | cDNA FLJ54  | 48.3766234  | 26 | 40 | 26 | 69.7  | 5.67  | 448 | 26 |
| P31153     | S-adenosyl  | 33.4177215  | 16 | 33 | 16 | 43.6  | 6.48  | 640 | 16 |
| B0QY89     | Eukaryotic  | 30.3130148  | 17 | 24 | 17 | 70.9  | 6.65  | 667 | 17 |
| P49748     | Very long-c | 41.3740458  | 19 | 24 | 19 | 70.3  | 8.75  | 465 | 19 |
| A0A140VJX1 | Testicular  | 46.8384075  | 14 | 22 | 14 | 45.2  | 8.85  | 305 | 14 |
| Q96I24     | Far upstre  | 50.5244755  | 21 | 29 | 18 | 61.6  | 8.38  | 368 | 21 |
| P55265     | Double-str  | 22.1859706  | 21 | 29 | 21 | 136   | 8.65  | 327 | 21 |
| P30084     | Enoyl-CoA   | 153.1034483 | 14 | 20 | 14 | 31.4  | 8.07  | 362 | 14 |
| A0A0S2Z3L2 | ATPase Ca+  | 22.0729367  | 18 | 23 | 18 | 114.7 | 5.34  | 378 | 18 |
| Q13344     | Fus-like pr | 27.0833333  | 11 | 23 | 10 | 53.3  | 9.42  | 410 | 11 |
| Q92499     | ATP-depend  | 30.4054054  | 18 | 24 | 18 | 82.4  | 7.23  | 298 | 18 |
| B1AHB0     | DNA helica  | 33.2425068  | 19 | 27 | 19 | 82.2  | 8.37  | 350 | 19 |
| A0A0C4DG89 | Probable A  | 124.5155039 | 21 | 25 | 1  | 117.4 | 9.29  | 545 | 21 |
| P62879     | Guanine nuc | 55.5882353  | 12 | 17 | 6  | 37.3  | 6     | 396 | 12 |
| Q99460     | 26S protea  | 29.3809024  | 20 | 27 | 20 | 105.8 | 5.39  | 381 | 20 |
| P15170     | Eukaryotic  | 45.0901804  | 19 | 29 | 10 | 55.7  | 5.62  | 429 | 19 |
| Q99623     | Prohibitin  | 60.8695652  | 20 | 25 | 20 | 33.3  | 9.83  | 417 | 20 |
| P31689     | DnaJ homol  | 35.768262   | 12 | 26 | 12 | 44.8  | 7.08  | 425 | 12 |
| P52209     | 6-phosphog  | 141.6149068 | 19 | 32 | 19 | 53.1  | 7.23  | 484 | 19 |
| A0A024R7B7 | CDC37 cell  | 48.9417989  | 17 | 26 | 17 | 44.4  | 5.25  | 351 | 17 |
| P55884     | Eukaryotic  | 26.5356265  | 20 | 25 | 20 | 92.4  | 5     | 404 | 20 |
| B4DS05     | cDNA FLJ59  | 29.7927461  | 11 | 21 | 10 | 44.1  | 4.7   | 529 | 11 |
| Q13813     | Spectrin al | 13.1472492  | 21 | 26 | 21 | 284.4 | 5.35  | 261 | 21 |
| P54819     | Adenylate   | 164.4351464 | 13 | 25 | 13 | 26.5  | 7.81  | 527 | 13 |
| P84098     | 60S ribosom | 38.7755102  | 13 | 39 | 13 | 23.5  | 11.47 | 597 | 13 |
| V9HWE8     | Epididymis  | 50.9803922  | 9  | 22 | 9  | 23.2  | 5.11  | 265 | 9  |
| K7ELL7     | Glucosidase | 28.5981308  | 16 | 27 | 16 | 60.2  | 4.41  | 514 | 16 |
| P62263     | 40S ribosom | 43.0463576  | 10 | 31 | 10 | 16.3  | 10.05 | 547 | 10 |
| B0ZBD0     | 40S ribosom | 67.5862069  | 14 | 36 | 14 | 16.1  | 10.32 | 725 | 14 |
| D6R9B6     | 40S ribosom | 81.3793103  | 16 | 33 | 1  | 16.5  | 9.25  | 474 | 16 |
| Q6P602     | TUBB protei | 57.2580645  | 11 | 75 | 1  | 14.4  | 4.27  | 997 | 11 |
| A0A0A0MRM9 | Nucleolar   | 25.9887006  | 21 | 38 | 21 | 74.6  | 9.47  | 470 | 21 |
| P11387     | DNA topois  | 30.1960784  | 21 | 28 | 21 | 90.7  | 9.31  | 359 | 21 |
| P52701     | DNA mismat  | 19.3382353  | 20 | 25 | 20 | 152.7 | 6.9   | 364 | 20 |
| Q53F64     | Heterogenec | 38.253012   | 16 | 26 | 15 | 36    | 7.42  | 431 | 16 |
| 075367     | Core histor | 39.7849462  | 12 | 25 | 12 | 39.6  | 9.79  | 596 | 12 |
| A2A3R5     | 40S ribosom | 31.6513761  | 9  | 21 | 1  | 25    | 11.14 | 561 | 9  |
| P30050     | 60S ribosom | 69.6969697  | 12 | 21 | 12 | 17.8  | 9.42  | 463 | 12 |
| D3DRX6     | Kinesin-li  | 30.529595   | 19 | 21 | 19 | 109.6 | 6.51  | 440 | 19 |
| Q53GG0     | Epithelial  | 30.9617918  | 18 | 25 | 18 | 85.2  | 6.84  | 301 | 18 |
| A0A024RA52 | Proteasome  | 46.1538462  | 8  | 18 | 8  | 25.9  | 7.43  | 462 | 8  |
| P08708     | 40S ribosom | 63.7037037  | 11 | 26 | 11 | 15.5  | 9.85  | 304 | 11 |
| 095373     | Importin-7  | 17.6300578  | 15 | 19 | 15 | 119.4 | 4.82  | 384 | 15 |
| Q59ED7     | Putative ur | 26.6763848  | 15 | 21 | 15 | 77.7  | 5.64  | 364 | 15 |
| B2R9S4     | cDNA, FLJ9  | 48.5632184  | 12 | 22 | 12 | 38.5  | 6.37  | 380 | 12 |
| Q3ZCS4     | Polyadenyl  | 30.2694136  | 18 | 29 | 5  | 70    | 9.67  | 544 | 18 |
| Q59G75     | Isoleucyl-t | 21.4229867  | 24 | 27 | 24 | 146.3 | 6.35  | 376 | 24 |
| P45880     | Voltage-de  | 58.1632653  | 10 | 32 | 10 | 31.5  | 7.56  | 567 | 10 |
| P62979     | Ubiquitin-  | 64.1025641  | 11 | 26 | 11 | 18    | 9.64  | 615 | 11 |
| P62269     | 40S ribosom | 66.4473684  | 17 | 33 | 17 | 17.7  | 10.99 | 683 | 17 |
| P55795     | Heterogenec | 35.857461   | 12 | 23 | 8  | 49.2  | 6.3   | 621 | 12 |
| P08727     | Keratin, ty | 57.75       | 21 | 32 | 14 | 44.1  | 5.14  | 597 | 21 |
| V9HW35     | Epididymis  | 77.7777778  | 9  | 22 | 9  | 17    | 7.24  | 253 | 9  |
| A0A140VJZ1 | Ubiquitinyl | 33.5664336  | 21 | 23 | 19 | 95.7  | 5.03  | 389 | 21 |
| A0A0S2Z4R1 | Tyrosine--  | 142.0454545 | 22 | 30 | 22 | 59.1  | 7.05  | 381 | 22 |
| I3L2B0     | Clustered p | 23.1391586  | 18 | 25 | 18 | 138.1 | 6.04  | 240 | 18 |
| P12429     | Annexin A3  | 43.6532508  | 14 | 22 | 14 | 36.4  | 5.92  | 525 | 14 |
| A8K492     | cDNA FLJ76  | 28          | 19 | 26 | 19 | 101.1 | 6.16  | 271 | 19 |
| P46776     | 60S ribosom | 33.1081081  | 8  | 21 | 8  | 16.6  | 11    | 570 | 8  |
| B2R5M8     | Isocitrate  | 49.0338164  | 17 | 25 | 16 | 46.6  | 7.01  | 302 | 17 |
| Q7L1Q6     | Basic leuci | 28.1622912  | 17 | 26 | 16 | 48    | 5.92  | 501 | 17 |
| P62906     | 60S ribosom | 54.3778802  | 13 | 30 | 13 | 24.8  | 9.94  | 379 | 13 |
| A0A140VK41 | Testicular  | 50.1557632  | 12 | 18 | 7  | 35    | 6.46  | 336 | 12 |
| Q12797     | Aspartyl/a  | 23.4828496  | 15 | 21 | 15 | 85.8  | 5.01  | 439 | 15 |

|            |                        |    |    |    |       |       |      |    |
|------------|------------------------|----|----|----|-------|-------|------|----|
| B3KY60     | cDNA FLJ16729.1770574  | 15 | 22 | 15 | 92.2  | 8.18  | 349  | 15 |
| P51858     | Hepatoma-dc54.1666667  | 12 | 19 | 10 | 26.8  | 4.73  | 239  | 12 |
| P17858     | ATP-dependc26.4102564  | 11 | 14 | 9  | 85    | 7.5   | 343  | 11 |
| P13797     | Plastin-3 (35.5555556  | 17 | 29 | 15 | 70.8  | 5.6   | 394  | 17 |
| Q02790     | Peptidyl-pr44.2265795  | 17 | 24 | 17 | 51.8  | 5.43  | 374  | 17 |
| V9GZ17     | Tubulin al130.1818182  | 10 | 34 | 2  | 31.1  | 8.29  | 850  | 10 |
| Q53HB3     | Proteasome 45.9090909  | 17 | 23 | 15 | 49.2  | 6.21  | 262  | 17 |
| P11498     | Pyruvate c27.5042445   | 21 | 26 | 21 | 129.6 | 6.84  | 375  | 21 |
| Q14566     | DNA replicc30.4506699  | 23 | 28 | 23 | 92.8  | 5.41  | 419  | 23 |
| A7BI36     | p180/ribosc20.7142857  | 23 | 28 | 23 | 165.6 | 8.97  | 439  | 23 |
| Q13428     | Treacle prc15.0537634  | 18 | 26 | 18 | 152   | 9.04  | 305  | 18 |
| E7EPK1     | Septin-7 0c37.0709382  | 16 | 23 | 15 | 50.7  | 8.63  | 273  | 16 |
| P23381     | Tryptophan-40.552017   | 15 | 26 | 15 | 53.1  | 6.23  | 277  | 15 |
| B4DN39     | cDNA FLJ53(35.9897172  | 18 | 32 | 1  | 42.9  | 6.62  | 460  | 18 |
| Q7L014     | Probable A1 24.442289  | 21 | 24 | 1  | 117.3 | 9.29  | 428  | 21 |
| P46087     | Probable 2c28.5714286  | 20 | 28 | 20 | 89.2  | 9.23  | 398  | 20 |
| P26583     | High mobil149.7607656  | 15 | 25 | 10 | 24    | 7.81  | 225  | 15 |
| O00148     | ATP-dependc45.1990632  | 15 | 23 | 4  | 49.1  | 5.68  | 335  | 15 |
| AOA024R608 | Ribosomal r71.0526316  | 4  | 14 | 3  | 11.5  | 4.32  | 191  | 4  |
| P62750     | 60S riboson60.2564103  | 14 | 30 | 2  | 17.7  | 10.45 | 454  | 14 |
| P16989     | Y-box-bind150.5376344  | 13 | 26 | 1  | 40.1  | 9.77  | 244  | 13 |
| Q5U0I6     | H. sapiens 155.1219512 | 13 | 22 | 7  | 22.7  | 6.21  | 492  | 13 |
| P28331     | NADH-ubiqui28.4731774  | 14 | 17 | 14 | 79.4  | 6.23  | 398  | 14 |
| B2R6F3     | Splicing fa42.6829268  | 8  | 44 | 8  | 19.3  | 11.65 | 625  | 8  |
| P21291     | Cysteine ar53.3678756  | 8  | 14 | 8  | 20.6  | 8.57  | 308  | 8  |
| Q86VP6     | Cullin-assc19.1056911  | 20 | 25 | 20 | 136.3 | 5.78  | 345  | 20 |
| AOA024RAV4 | Cold shock 61.7161716  | 13 | 26 | 1  | 31.9  | 9.66  | 230  | 13 |
| Q13151     | Heterogenec41.9672131  | 13 | 22 | 11 | 30.8  | 9.29  | 386  | 13 |
| A2A274     | Aconitate 127.5776398  | 17 | 21 | 17 | 87.8  | 7.37  | 455  | 17 |
| AOA0S2Z404 | Regulator c 39.159292  | 11 | 19 | 11 | 48.1  | 8.16  | 512  | 11 |
| AOA087X1N8 | Serpin B6 (38.9873418  | 12 | 18 | 12 | 44.8  | 5.68  | 325  | 12 |
| Q597H1     | Transforma136.8020305  | 8  | 19 | 8  | 42.8  | 5.82  | 461  | 8  |
| AOA140VK56 | Transaldolc43.3234421  | 15 | 25 | 15 | 37.5  | 6.81  | 392  | 15 |
| J3KTL2     | Serine/argi66.0079051  | 19 | 50 | 18 | 28.3  | 10.08 | 700  | 19 |
| P06744     | Glucose-6-p37.8136201  | 14 | 23 | 14 | 63.1  | 8.32  | 267  | 14 |
| O00231     | 26S proteas 55.450237  | 20 | 25 | 20 | 47.4  | 6.48  | 265  | 20 |
| P13929     | Beta-enolas39.6313364  | 10 | 41 | 5  | 47    | 7.71  | 1179 | 10 |
| P62633     | Cellular nt57.0621469  | 11 | 19 | 11 | 19.5  | 7.71  | 299  | 11 |
| Q14400     | GLUD1 prote45.7364341  | 8  | 18 | 2  | 28.7  | 7.97  | 387  | 8  |
| AOA0C4DGB5 | Calpastatir34.0848806  | 16 | 21 | 2  | 81    | 5.1   | 165  | 16 |
| AOA024RAI1 | ARP3 actin-39.7129187  | 14 | 21 | 4  | 47.3  | 5.88  | 257  | 14 |
| Q9UHX1     | Poly(U)-bir30.2325581  | 10 | 15 | 10 | 59.8  | 5.29  | 276  | 10 |
| P08237     | ATP-dependc27.9487179  | 15 | 19 | 13 | 85.1  | 7.99  | 382  | 15 |
| AOA024RAU3 | Tubulin ty132.2981366  | 12 | 15 | 12 | 74.4  | 5.53  | 310  | 12 |
| X5DNM4     | Lactoylglu178.2608696  | 11 | 25 | 11 | 20.8  | 5.31  | 260  | 11 |
| Q00688     | Peptidyl-pr 56.25      | 14 | 19 | 14 | 25.2  | 9.28  | 391  | 14 |
| Q14240     | Eukaryotic 37.8378378  | 15 | 24 | 3  | 46.4  | 5.48  | 580  | 15 |
| P62280     | 40S riboson72.1518987  | 16 | 32 | 16 | 18.4  | 10.3  | 556  | 16 |
| AOA140VKA6 | Testis secc30.8943089  | 14 | 21 | 14 | 41.3  | 5.27  | 430  | 14 |
| Q13501     | Sequestoson39.0909091  | 11 | 17 | 11 | 47.7  | 5.22  | 394  | 11 |
| P43686     | 26S proteas46.4114833  | 14 | 18 | 13 | 47.3  | 5.21  | 332  | 14 |
| AOA0S2Z2Z6 | Annexin (Fr31.9465082  | 18 | 25 | 18 | 75.8  | 5.6   | 398  | 18 |
| Q13185     | Chromobox r63.9344262  | 10 | 25 | 8  | 20.8  | 5.33  | 476  | 10 |
| Q14157     | Ubiquitin-c22.0791168  | 14 | 19 | 14 | 114.5 | 7.11  | 321  | 14 |
| G3V1V0     | Myosin lig165.2173913  | 8  | 19 | 8  | 18    | 4.77  | 528  | 8  |
| Q96TA1     | Niban-like 25.6032172  | 17 | 26 | 17 | 84.1  | 6.19  | 231  | 17 |
| Q9BY44     | Eukaryotic 38.8034188  | 18 | 22 | 18 | 64.9  | 8.87  | 247  | 18 |
| Q02543     | 60S riboson53.4090909  | 14 | 28 | 14 | 20.7  | 10.71 | 384  | 14 |
| X5DR09     | General trc22.6452906  | 19 | 28 | 19 | 112.3 | 6.39  | 239  | 19 |
| P25786     | Proteasome 49.8098859  | 12 | 27 | 12 | 29.5  | 6.61  | 442  | 12 |
| P14324     | Farnesyl py 23.150358  | 10 | 16 | 10 | 48.2  | 6.15  | 265  | 10 |
| V9HW12     | Epididymis 58.0808081  | 13 | 24 | 12 | 21.9  | 5.97  | 376  | 13 |
| P53618     | Coatomer st23.2948583  | 13 | 16 | 13 | 107.1 | 6.05  | 232  | 13 |
| AOA024RBE8 | Solute carr 32.132964  | 13 | 26 | 13 | 39.9  | 9.36  | 465  | 13 |
| Q59G24     | Activated f69.4029851  | 11 | 23 | 11 | 15.1  | 9.38  | 302  | 11 |
| P38117     | Electron tr56.4705882  | 14 | 22 | 14 | 27.8  | 8.1   | 448  | 14 |
| B3KS98     | Eukaryotic 34.1530055  | 12 | 19 | 12 | 41.6  | 7.33  | 259  | 12 |
| Q03252     | Lamin-B2 0c38.0645161  | 22 | 26 | 16 | 69.9  | 5.59  | 373  | 22 |
| AOA1L7NY41 | Polypeptide36.2711864  | 17 | 21 | 17 | 66.4  | 8.25  | 347  | 17 |
| B2RBE5     | cDNA, FLJ925.6351039   | 15 | 19 | 15 | 101.2 | 7.42  | 303  | 15 |
| Q14914     | Prostaglanc45.5927052  | 13 | 18 | 13 | 35.8  | 8.29  | 285  | 13 |
| Q13148     | TAR DNA-bir35.5072464  | 12 | 15 | 12 | 44.7  | 6.19  | 462  | 12 |
| B2RDGO     | Proteasome 42.9118774  | 9  | 13 | 9  | 29.4  | 7.72  | 382  | 9  |

|            |               |              |    |    |    |       |       |     |    |
|------------|---------------|--------------|----|----|----|-------|-------|-----|----|
| Q562R1     | Beta-actin    | 39.893617    | 14 | 64 | 3  | 42    | 5.59  | 942 | 14 |
| P46783     | 40S ribosom   | 56.969697    | 11 | 22 | 10 | 18.9  | 10.15 | 263 | 11 |
| P22087     | rRNA 2'-O-m   | 40.4984424   | 12 | 18 | 12 | 33.8  | 10.18 | 447 | 12 |
| K7EJV9     | 60S ribosom   | 52.3529412   | 14 | 33 | 2  | 19.4  | 10.48 | 355 | 14 |
| P28070     | Proteasome    | 42.8030303   | 8  | 15 | 8  | 29.2  | 5.97  | 336 | 8  |
| P54886     | Delta-1-py1   | 28.9308176   | 18 | 23 | 18 | 87.2  | 7.12  | 281 | 18 |
| B2RBEO     | cDNA, FLJ9    | 28.75        | 14 | 19 | 11 | 80.3  | 8.46  | 377 | 14 |
| P55084     | Trifunctio    | 46.4135021   | 14 | 17 | 14 | 51.3  | 9.41  | 165 | 14 |
| B4E1U9     | cDNA FLJ54737 | 2881356      | 9  | 24 | 8  | 26.5  | 7.59  | 326 | 9  |
| Q549N0     | Cofilin 2     | 78.9156627   | 12 | 19 | 7  | 18.7  | 7.88  | 441 | 12 |
| O95757     | Heat shock    | 24.6722288   | 19 | 22 | 14 | 94.5  | 5.88  | 325 | 19 |
| Q59HE3     | Calpastatin   | 30.6122449   | 15 | 19 | 1  | 84.2  | 5.35  | 170 | 15 |
| Q9Y678     | Coatome       | st26.5446224 | 17 | 20 | 15 | 97.7  | 5.47  | 282 | 17 |
| A0A024R814 | Ribosomal p   | 40.1544402   | 18 | 41 | 18 | 30.4  | 10.71 | 446 | 18 |
| Q14444     | Caprin-1      | 0525.9520451 | 13 | 20 | 13 | 78.3  | 5.25  | 250 | 13 |
| Q549M8     | CLE7 OS=Hon   | 56.9672131   | 11 | 17 | 11 | 28.1  | 6.65  | 383 | 11 |
| Q96AG4     | Leucine-ric   | 46.5798046   | 10 | 17 | 10 | 34.9  | 9.57  | 282 | 10 |
| O43776     | Asparagine    | 23.540146    | 10 | 15 | 10 | 62.9  | 6.25  | 217 | 10 |
| Q14126     | Desmoglein    | 15.4740608   | 11 | 14 | 11 | 122.2 | 5.24  | 336 | 11 |
| Q9BVP2     | Guanine nuc   | 41.3479053   | 18 | 19 | 18 | 62    | 9.16  | 302 | 18 |
| P36873     | Serine/thre   | 44.8916409   | 11 | 18 | 3  | 37    | 6.54  | 350 | 11 |
| P60174     | Triosephos    | 52.0979021   | 12 | 17 | 12 | 30.8  | 5.92  | 300 | 12 |
| Q15046     | Lysine--tr    | 31.1557789   | 16 | 27 | 16 | 68    | 6.35  | 373 | 16 |
| P30520     | Adenylosucc   | 34.8684211   | 12 | 16 | 12 | 50.1  | 6.55  | 352 | 12 |
| P62888     | 60S ribosom   | 81.7391304   | 12 | 23 | 11 | 12.8  | 9.63  | 515 | 12 |
| P61586     | Transformir   | 40.4145078   | 10 | 25 | 4  | 21.8  | 6.1   | 427 | 10 |
| G3V5Z7     | Proteasome    | 47.2222222   | 15 | 22 | 15 | 28.1  | 6.76  | 347 | 15 |
| F6QDS0     | HCG2043426    | 40.5010438   | 15 | 15 | 1  | 54    | 6.3   | 270 | 15 |
| Q8NBS9     | Thioredoxin   | 31.25        | 11 | 18 | 11 | 47.6  | 5.97  | 350 | 11 |
| O60684     | Importin st   | 30.5970149   | 13 | 18 | 8  | 60    | 4.98  | 341 | 13 |
| Q92688     | Acidic leuc   | 32.6693227   | 12 | 20 | 7  | 28.8  | 4.06  | 426 | 12 |
| Q13085     | Acetyl-CoA    | 10.2728048   | 17 | 18 | 17 | 265.4 | 6.37  | 302 | 17 |
| A0A024R1Q8 | Ribosomal p   | 55           | 11 | 16 | 11 | 14.9  | 10.51 | 342 | 11 |
| Q59EA2     | Coronin (F)   | 46.9061876   | 18 | 21 | 18 | 56.3  | 8.19  | 385 | 18 |
| P62244     | 40S ribosom   | 68.4615385   | 11 | 19 | 6  | 14.8  | 10.13 | 448 | 11 |
| Q6FIG4     | RAB1B prote   | 63.1840796   | 13 | 20 | 7  | 22.2  | 5.73  | 434 | 13 |
| Q16401     | 26S proteas   | 35.515873    | 13 | 15 | 13 | 56.2  | 5.48  | 397 | 13 |
| Q9Y383     | Putative R    | 43.877551    | 17 | 23 | 11 | 46.5  | 10.01 | 300 | 17 |
| Q92621     | Nuclear por   | 6.75944334   | 10 | 13 | 10 | 227.8 | 6.19  | 355 | 10 |
| A0A140VK27 | Leukotriene   | 34.2062193   | 14 | 17 | 14 | 69.2  | 6.18  | 390 | 14 |
| Q5T4S7     | E3 ubiquiti   | 5.46015821   | 17 | 24 | 15 | 573.5 | 6.04  | 257 | 17 |
| A8KAQ5     | cDNA FLJ77    | 27.4599542   | 13 | 22 | 13 | 51.5  | 10.01 | 381 | 13 |
| B3KSH1     | Eukaryotic    | 29.0322581   | 9  | 15 | 9  | 39.1  | 5.45  | 317 | 9  |
| A0A0C4DGG9 | Chromodoma    | 10.6350026   | 14 | 17 | 11 | 220.3 | 6.02  | 299 | 14 |
| P62136     | Serine/thre   | 44.5454545   | 11 | 19 | 3  | 37.5  | 6.33  | 295 | 11 |
| A8K0T9     | cDNA FLJ75    | 53.8461538   | 10 | 19 | 9  | 32.9  | 5.69  | 313 | 10 |
| B2RCM2     | cDNA, FLJ9    | 19.6428571   | 17 | 21 | 17 | 134.4 | 7.2   | 224 | 17 |
| HOYKD8     | 60S ribosom   | 45.2941176   | 13 | 34 | 13 | 19.1  | 11.46 | 479 | 13 |
| Q8TEQ6     | Gem-associ    | 16.1803714   | 15 | 20 | 15 | 168.5 | 6.62  | 231 | 15 |
| Q13619     | Cullin-4A     | (21.8708827  | 14 | 17 | 10 | 87.6  | 8.13  | 318 | 14 |
| P36952     | Serpin B5     | (52.8        | 13 | 15 | 13 | 42.1  | 6.05  | 320 | 13 |
| O75521     | Enoyl-CoA     | (33.7563452  | 11 | 15 | 11 | 43.6  | 9     | 350 | 11 |
| Q9Y266     | Nuclear mi    | 40.7854985   | 12 | 24 | 12 | 38.2  | 5.38  | 285 | 12 |
| P67775     | Serine/thre   | 43.6893204   | 12 | 17 | 4  | 35.6  | 5.54  | 172 | 12 |
| P78344     | Eukaryotic    | 22.8224917   | 14 | 22 | 14 | 102.3 | 7.14  | 177 | 14 |
| Q9Y2X3     | Nucleolar p   | 28.5444234   | 13 | 20 | 13 | 59.5  | 8.92  | 318 | 13 |
| P14550     | Alcohol de    | 52.9230769   | 13 | 17 | 12 | 36.6  | 6.79  | 204 | 13 |
| P20618     | Proteasome    | 37.3443983   | 7  | 14 | 7  | 26.5  | 8.13  | 217 | 7  |
| Q562L9     | Actin-like    | 87.3786408   | 5  | 37 | 1  | 11.5  | 6.52  | 304 | 5  |
| Q8WXX5     | DnaJ homol    | 40.7692308   | 8  | 12 | 8  | 29.9  | 5.73  | 247 | 8  |
| MOQZM1     | Heterogene    | 58.4856397   | 18 | 27 | 1  | 40    | 6.73  | 416 | 18 |
| Q14258     | E3 ubiquiti   | 27.1428571   | 13 | 19 | 1  | 70.9  | 8.09  | 216 | 13 |
| Q9Y2W1     | Thyroid ho    | 18.5340314   | 13 | 25 | 13 | 108.6 | 10.15 | 159 | 13 |
| Q12965     | Unconventi    | 22.1119134   | 21 | 23 | 21 | 127   | 8.92  | 248 | 21 |
| P63313     | Thymosin b    | 93.1818182   | 8  | 33 | 8  | 5     | 5.36  | 605 | 8  |
| Q00059     | Transcript    | 149.5934959  | 12 | 19 | 12 | 29.1  | 9.72  | 253 | 12 |
| A0A024R1S8 | LIM and SH    | 59.0038314   | 14 | 25 | 14 | 29.7  | 7.05  | 270 | 14 |
| A0A024RAM0 | Transportir   | 17.9287305   | 13 | 15 | 13 | 102.3 | 4.98  | 349 | 13 |
| Q12788     | Transducin    | 27.4752475   | 13 | 15 | 13 | 89    | 6.9   | 356 | 13 |
| P06737     | Glycogen pl   | 29.0436836   | 19 | 21 | 18 | 97.1  | 7.17  | 180 | 19 |
| O15143     | Actin-relat   | 32.2580645   | 10 | 13 | 9  | 40.9  | 8.35  | 231 | 10 |
| P61106     | Ras-relate    | c60          | 11 | 19 | 9  | 23.9  | 6.21  | 348 | 11 |
| A0A024R1K7 | Tyrosine 3-   | 52.0325203   | 15 | 23 | 10 | 28.2  | 4.84  | 351 | 15 |

|            |             |              |    |    |    |       |       |     |    |
|------------|-------------|--------------|----|----|----|-------|-------|-----|----|
| P49189     | 4-trimethyl | 131.7813765  | 14 | 18 | 14 | 53.8  | 5.87  | 282 | 14 |
| P62195     | 26S proteas | 46.3054187   | 14 | 17 | 12 | 45.6  | 7.55  | 261 | 14 |
| Q15459     | Splicing fa | 23.0769231   | 13 | 20 | 13 | 88.8  | 5.22  | 348 | 13 |
| P37108     | Signal rece | 69.1176471   | 8  | 18 | 8  | 14.6  | 10.04 | 450 | 8  |
| P09622     | Dihydrolipe | 35.9528487   | 14 | 19 | 14 | 54.1  | 7.85  | 362 | 14 |
| P54578     | Ubiquitin c | 30.3643725   | 11 | 15 | 11 | 56    | 5.3   | 279 | 11 |
| O60264     | SWI/SNF-rel | 18.8212928   | 19 | 24 | 19 | 121.8 | 8.09  | 376 | 19 |
| Q15785     | Mitochondri | 51.1326861   | 12 | 15 | 12 | 34.5  | 8.98  | 361 | 12 |
| Q9NUU7     | ATP-depende | 39.1213389   | 16 | 16 | 2  | 53.9  | 6.58  | 287 | 16 |
| AOA140VK53 | Testicular  | 8.28488372   | 16 | 18 | 16 | 299.4 | 12.06 | 319 | 16 |
| H7C2I1     | Protein arg | 29.9191375   | 9  | 16 | 9  | 42.4  | 5.35  | 303 | 9  |
| O75340     | Programmed  | 62.8272251   | 7  | 14 | 7  | 21.9  | 5.4   | 261 | 7  |
| A8K5Y7     | cDNA FLJ78  | 14.8671096   | 14 | 16 | 14 | 136.2 | 5.9   | 270 | 14 |
| P40222     | Alpha-taxil | 43.956044    | 15 | 21 | 14 | 61.9  | 6.52  | 307 | 15 |
| Q6FHV6     | ENO2 protei | 28.8018433   | 8  | 30 | 4  | 47.2  | 5.03  | 727 | 8  |
| K7EM18     | Eukaryotic  | 76.0330579   | 5  | 11 | 5  | 13.6  | 7.9   | 281 | 5  |
| AOA024RDF6 | Heterogenec | 22.6190476   | 13 | 22 | 10 | 46.4  | 9.57  | 273 | 13 |
| Q59GW5     | Tripartite  | 26.863354    | 13 | 21 | 1  | 72.2  | 8.06  | 144 | 13 |
| Q9Y2B0     | Protein car | 60.989011    | 10 | 16 | 10 | 20.6  | 4.92  | 373 | 10 |
| A8K3Q9     | cDNA FLJ76  | 43.0555556   | 12 | 17 | 4  | 23.4  | 10.93 | 376 | 12 |
| P07741     | Adenine phc | 75           | 9  | 16 | 9  | 19.6  | 6.02  | 347 | 9  |
| Q92900     | Regulator c | 23.0292294   | 20 | 21 | 20 | 124.3 | 6.61  | 212 | 20 |
| Q9NY33     | Dipeptidyl  | 22.7951153   | 11 | 15 | 11 | 82.5  | 5.1   | 378 | 11 |
| P35613     | Basigin OS  | 30.9090909   | 9  | 16 | 9  | 42.2  | 5.66  | 279 | 9  |
| Q96T67     | TOB3 OS=Ho  | 20.4152249   | 11 | 17 | 2  | 65.1  | 9.33  | 240 | 11 |
| B2R7T8     | cDNA, FLJ9  | 51.8382353   | 12 | 17 | 12 | 30.6  | 6     | 262 | 12 |
| Q9UHD8     | Septin-9 O  | 46.2457338   | 18 | 25 | 18 | 65.4  | 8.97  | 253 | 18 |
| O00151     | PDZ and LI  | 62.9179331   | 10 | 12 | 10 | 36    | 7.02  | 268 | 10 |
| P26358     | DNA (cytosi | 14.2326733   | 19 | 21 | 19 | 183.1 | 7.75  | 306 | 19 |
| P48047     | ATP syntha  | s 65.258216  | 11 | 17 | 11 | 23.3  | 9.96  | 358 | 11 |
| Q13011     | Delta(3,5)  | -40.2439024  | 10 | 13 | 10 | 35.8  | 8     | 419 | 10 |
| AOA0S2Z5M8 | ElaC homol  | c 26.0290557 | 14 | 15 | 14 | 92.2  | 7.9   | 225 | 14 |
| P02533     | Keratin, t  | 26.9067797   | 19 | 28 | 1  | 51.5  | 5.16  | 395 | 19 |
| P63151     | Serine/thre | 42.0581655   | 12 | 14 | 12 | 51.7  | 6.2   | 260 | 12 |
| O95816     | BAG family  | 48.3412322   | 9  | 17 | 9  | 23.8  | 6.7   | 250 | 9  |
| P61019     | Ras-relate  | c 56.1320755 | 10 | 12 | 10 | 23.5  | 6.54  | 324 | 10 |
| P08559     | Pyruvate de | 35.6410256   | 13 | 16 | 13 | 43.3  | 8.06  | 244 | 13 |
| Q9P0L0     | Vesicle-as  | 48.1927711   | 13 | 25 | 12 | 27.9  | 8.62  | 452 | 13 |
| Q15942     | Zyxin OS=H  | c 33.041958  | 13 | 22 | 13 | 61.2  | 6.67  | 305 | 13 |
| AOA0KOK1K7 | 6-phosphog  | 162.0155039  | 11 | 19 | 11 | 27.5  | 6.05  | 265 | 11 |
| O14929     | Histone acc | 26.7303103   | 8  | 9  | 8  | 49.5  | 5.69  | 343 | 8  |
| Q9BWF3     | RNA-binding | 50.2747253   | 13 | 18 | 13 | 40.3  | 7.08  | 359 | 13 |
| Q12792     | Twinfilin-  | 128.8571429  | 7  | 10 | 7  | 40.3  | 6.96  | 330 | 7  |
| Q9BYX7     | Putative be | 20.5333333   | 6  | 36 | 1  | 42    | 6.33  | 862 | 6  |
| Q9BTE3     | Mini-chrom  | c 26.7912773 | 13 | 19 | 13 | 72.9  | 5.87  | 229 | 13 |
| Q6PKG0     | La-related  | 21.9890511   | 14 | 17 | 14 | 123.4 | 8.82  | 213 | 14 |
| Q86V81     | THO comple  | 42.4124514   | 9  | 11 | 9  | 26.9  | 11.15 | 250 | 9  |
| AOA024QZK8 | Heterogenec | 42.4855491   | 9  | 12 | 9  | 36.9  | 6.87  | 353 | 9  |
| E9PL71     | Elongation  | 52.4064171   | 10 | 20 | 1  | 20.8  | 5.01  | 476 | 10 |
| A8K6U7     | cDNA FLJ78  | 23.4813084   | 14 | 16 | 14 | 95.6  | 6.92  | 201 | 14 |
| Q53FE8     | cDNA FLJ36  | 34.8648649   | 9  | 18 | 9  | 40.5  | 5.14  | 212 | 9  |
| Q96QK1     | Vacuolar pi | 22.8643216   | 15 | 18 | 15 | 91.6  | 5.49  | 305 | 15 |
| P23634     | Plasma mem  | 16.1966156   | 11 | 16 | 7  | 137.8 | 6.6   | 215 | 11 |
| B2R5M9     | cDNA, FLJ9  | 19.2572215   | 12 | 14 | 12 | 83.5  | 7.02  | 320 | 12 |
| Q14247     | Src substr  | c 35.8181818 | 17 | 20 | 17 | 61.5  | 5.4   | 295 | 17 |
| Q9UJS0     | Calcium-bir | 23.1111111   | 11 | 15 | 8  | 74.1  | 8.62  | 232 | 11 |
| B2RD27     | cDNA, FLJ9  | 44.7530864   | 11 | 14 | 11 | 37    | 6.77  | 207 | 11 |
| P32320     | Cytidine de | 51.369863    | 6  | 12 | 6  | 16.2  | 6.92  | 180 | 6  |
| V9HW04     | Serine/thre | c 37.9204893 | 9  | 16 | 2  | 37.2  | 6.19  | 238 | 9  |
| O95433     | Activator c | 32.2485207   | 11 | 15 | 11 | 38.3  | 5.53  | 204 | 11 |
| O43684     | Mitotic che | 45.1219512   | 12 | 19 | 12 | 37.1  | 6.84  | 337 | 12 |
| Q6ZNK5     | FLJ00293 pi | 19.7044335   | 12 | 14 | 12 | 92.8  | 8.95  | 243 | 12 |
| A6NEM2     | Host cell   | 18.84615385  | 14 | 14 | 14 | 213.3 | 7.33  | 216 | 14 |
| O14744     | Protein arg | 26.844584    | 13 | 18 | 13 | 72.6  | 6.29  | 197 | 13 |
| E5KMI6     | Lon proteas | 16.6840459   | 14 | 17 | 14 | 106.4 | 6.39  | 243 | 14 |
| Q12874     | Splicing fa | 27.5449102   | 11 | 14 | 11 | 58.8  | 5.38  | 286 | 11 |
| P49790     | Nuclear poi | 15.7288136   | 14 | 16 | 14 | 153.8 | 8.73  | 260 | 14 |
| P35527     | Keratin, t  | 28.2504013   | 12 | 13 | 11 | 62    | 5.24  | 333 | 12 |
| AOA1BOGW77 | Alpha-amin  | c 38.6281588 | 14 | 18 | 14 | 60    | 8.18  | 239 | 14 |
| A8K3A8     | cDNA FLJ75  | 24.6451613   | 15 | 17 | 15 | 87.8  | 7.15  | 133 | 15 |
| Q59EF6     | Calpain 2,  | 24.005487    | 10 | 12 | 10 | 83.1  | 5.06  | 181 | 10 |
| AOA024RDE5 | Ras-GTPase  | 28.2157676   | 11 | 16 | 10 | 54.1  | 5.55  | 288 | 11 |
| P49773     | Histidine t | 73.8095238   | 5  | 11 | 5  | 13.8  | 6.95  | 175 | 5  |

|            |                        |    |    |    |       |       |     |    |
|------------|------------------------|----|----|----|-------|-------|-----|----|
| P14923     | Junction p120.5369128  | 9  | 13 | 9  | 81.7  | 6.14  | 264 | 9  |
| P33316     | Deoxyuridir48.4126984  | 10 | 14 | 10 | 26.5  | 9.36  | 347 | 10 |
| Q9H0A0     | RNA cytidir19.6097561  | 15 | 19 | 6  | 115.7 | 8.27  | 112 | 15 |
| C9J6P4     | Zinc finger18.5546875  | 14 | 15 | 14 | 114   | 8.56  | 336 | 14 |
| P35268     | 60S ribosom 68.75      | 9  | 18 | 9  | 14.8  | 9.19  | 544 | 9  |
| B3KRM2     | Serine/thre 42.394822  | 9  | 14 | 1  | 35.5  | 5.43  | 135 | 9  |
| P60891     | Ribose-phos39.3081761  | 11 | 17 | 6  | 34.8  | 6.98  | 228 | 11 |
| P08758     | Annexin A5 40.3125     | 12 | 16 | 12 | 35.9  | 5.05  | 276 | 12 |
| Q15293     | Reticulocal34.4410876  | 6  | 18 | 6  | 38.9  | 5     | 195 | 6  |
| Q5H9N4     | Putative ur47.8547855  | 12 | 20 | 10 | 34.8  | 8.95  | 177 | 12 |
| Q01081     | Splicing fe41.6666667  | 7  | 16 | 7  | 27.9  | 8.81  | 385 | 7  |
| 075116     | Rho-associat16.8587896 | 19 | 19 | 17 | 160.8 | 6.02  | 216 | 19 |
| Q9BQG0     | Myb-binding15.6626506  | 16 | 20 | 16 | 148.8 | 9.28  | 285 | 16 |
| P28074     | Proteasome 41.4448669  | 9  | 13 | 9  | 28.5  | 6.92  | 304 | 9  |
| Q8IY81     | pre-rRNA p17.1192444   | 11 | 14 | 11 | 96.5  | 8.4   | 249 | 11 |
| Q01469     | Fatty acid-71.1111111  | 12 | 16 | 12 | 15.2  | 7.01  | 94  | 12 |
| P31150     | Rab GDP di:32.2147651  | 11 | 16 | 4  | 50.6  | 5.14  | 264 | 11 |
| P62249     | 40S ribosom59.5890411  | 10 | 26 | 10 | 16.4  | 10.21 | 544 | 10 |
| 014745     | Na(+)/H(+) 48.3240223  | 13 | 22 | 13 | 38.8  | 5.77  | 187 | 13 |
| Q8N163     | Cell cycle 23.9436662  | 13 | 15 | 13 | 102.8 | 5.22  | 247 | 13 |
| 000425     | Insulin-li129.3609672  | 12 | 15 | 10 | 63.7  | 8.87  | 322 | 12 |
| A0A024R8P8 | Ribosomal p57.1428571  | 6  | 16 | 6  | 8.2   | 10.1  | 290 | 6  |
| B5BU01     | Eukaryotic 33.3333333  | 11 | 19 | 11 | 38.3  | 5.94  | 327 | 11 |
| P55036     | 26S proteas33.1564987  | 8  | 10 | 8  | 40.7  | 4.79  | 308 | 8  |
| Q9UBT2     | SUMO-activat 26.25     | 13 | 18 | 13 | 71.2  | 5.29  | 136 | 13 |
| Q6IRT1     | S-(hydroxyn20.5882353  | 7  | 12 | 7  | 39.7  | 7.49  | 154 | 7  |
| Q96AC1     | Fermitin fe26.4705882  | 12 | 15 | 12 | 77.8  | 6.7   | 246 | 12 |
| A0A024R2Q4 | Ribosomal p45.0980392  | 11 | 28 | 11 | 24.1  | 11.62 | 283 | 11 |
| H9ZYJ2     | Thioredoxin166.6666667 | 7  | 18 | 7  | 11.7  | 4.92  | 354 | 7  |
| Q9H2U1     | ATP-depend17.2619048   | 12 | 14 | 11 | 114.7 | 7.68  | 255 | 12 |
| P68431     | Histone H3.61.7647059  | 14 | 41 | 5  | 15.4  | 11.12 | 492 | 14 |
| Q59F14     | Importin 4 11.5506329  | 10 | 11 | 10 | 138.1 | 5.25  | 241 | 10 |
| V9HW63     | Epididymis 40.9594096  | 9  | 15 | 6  | 30.5  | 6.29  | 204 | 9  |
| P61981     | 14-3-3 prot46.9635628  | 12 | 21 | 5  | 28.3  | 4.89  | 322 | 12 |
| Q13247     | Serine/argi23.8372093  | 10 | 17 | 8  | 39.6  | 11.43 | 431 | 10 |
| P30040     | Endoplasmic55.9386973  | 10 | 19 | 10 | 29    | 7.31  | 304 | 10 |
| Q59FV6     | ARP3 actin-34.9593496  | 11 | 17 | 1  | 42.2  | 5.87  | 161 | 11 |
| Q15021     | Condensin c 13.847252  | 13 | 14 | 13 | 157.1 | 6.61  | 262 | 13 |
| P08134     | Rho-relatec37.8238342  | 9  | 20 | 3  | 22    | 6.58  | 241 | 9  |
| Q04828     | Aldo-keto r 33.74613   | 10 | 17 | 2  | 36.8  | 7.88  | 205 | 10 |
| 075821     | Eukaryotic 46.25       | 9  | 13 | 9  | 35.6  | 6.13  | 170 | 9  |
| P43490     | Nicotinamic29.7352342  | 10 | 14 | 10 | 55.5  | 7.15  | 222 | 10 |
| P55809     | Succinyl-Cc29.8076923  | 14 | 18 | 14 | 56.1  | 7.46  | 277 | 14 |
| Q13442     | 28 kDa heat35.9116022  | 11 | 15 | 11 | 20.6  | 8.87  | 209 | 11 |
| P20290     | Transcripti61.6504854  | 8  | 13 | 5  | 22.2  | 9.38  | 304 | 8  |
| P35606     | Coatomer st22.2958057  | 13 | 14 | 13 | 102.4 | 5.27  | 193 | 13 |
| P42766     | 60S ribosom38.2113821  | 8  | 20 | 8  | 14.5  | 11.05 | 317 | 8  |
| G1UI16     | SCC-112 prc17.5018699  | 16 | 18 | 16 | 150.7 | 7.91  | 301 | 16 |
| D2CFK9     | Nucleolar (28.8643533  | 15 | 19 | 15 | 73.9  | 9.5   | 232 | 15 |
| P52732     | Kinesin-li119.6969697  | 14 | 16 | 14 | 119.1 | 5.64  | 136 | 14 |
| Q99615     | DnaJ homolc35.2226721  | 13 | 16 | 13 | 56.4  | 6.96  | 207 | 13 |
| A8K5U9     | cDNA FLJ75(25.4601227  | 9  | 11 | 6  | 70.7  | 7.62  | 233 | 9  |
| P56537     | Eukaryotic 46.5306122  | 7  | 18 | 7  | 26.6  | 4.68  | 307 | 7  |
| Q9NV17     | ATPase fami28.0757098  | 14 | 18 | 5  | 71.3  | 8.98  | 138 | 14 |
| 078218     | Lymphocyte 23.480663   | 8  | 18 | 2  | 40.5  | 6.62  | 279 | 8  |
| Q16531     | DNA damage- 19.122807  | 13 | 14 | 13 | 126.9 | 5.26  | 126 | 13 |
| P60866     | 40S ribosom49.5798319  | 9  | 22 | 9  | 13.4  | 9.94  | 392 | 9  |
| 060832     | H/ACA ribor34.2412451  | 13 | 16 | 13 | 57.6  | 9.42  | 201 | 13 |
| P61604     | 10 kDa heat77.4509804  | 11 | 24 | 11 | 10.9  | 8.92  | 474 | 11 |
| Q9Y5M8     | Signal recc34.3173432  | 6  | 9  | 6  | 29.7  | 9.04  | 234 | 6  |
| 000469     | Procollager17.0963365  | 11 | 14 | 11 | 84.6  | 6.71  | 246 | 11 |
| B1AHD1     | NHP2-like p43.9393939  | 7  | 14 | 7  | 14.6  | 8.46  | 253 | 7  |
| Q6FHG5     | Gamma-synuc 74.8031496 | 6  | 9  | 6  | 13.3  | 4.86  | 300 | 6  |
| P31947     | 14-3-3 prot49.1935484  | 11 | 25 | 7  | 27.8  | 4.74  | 412 | 11 |
| A8K2T7     | Receptor p15.2892562   | 13 | 15 | 13 | 134.1 | 6.7   | 188 | 13 |
| Q09028     | Histone-bir27.2941176  | 10 | 18 | 4  | 47.6  | 4.89  | 196 | 10 |
| 014737     | Programmed 55.2        | 8  | 12 | 8  | 14.3  | 6.04  | 410 | 8  |
| Q92878     | DNA repair 13.4908537  | 13 | 15 | 13 | 153.8 | 6.89  | 265 | 13 |
| A0A024QZS4 | Peptidyl-pr60.8695652  | 9  | 17 | 9  | 22    | 9.38  | 194 | 9  |
| Q16629     | Serine/argi36.9747899  | 11 | 17 | 11 | 27.4  | 11.82 | 119 | 11 |
| Q02750     | Dual specif26.2086514  | 8  | 12 | 4  | 43.4  | 6.62  | 293 | 8  |
| J3KN16     | KIAA0368 O:9.91571641  | 14 | 16 | 14 | 223.6 | 8.75  | 212 | 14 |
| H7BZJ3     | Protein di:58.5365854  | 9  | 19 | 1  | 13.5  | 7.3   | 439 | 9  |

|            |                        |    |    |    |       |       |     |    |
|------------|------------------------|----|----|----|-------|-------|-----|----|
| Q93009     | Ubiquitin c13.5208711  | 12 | 14 | 12 | 128.2 | 5.55  | 162 | 12 |
| Q9BZZ5     | Apoptosis i23.6641221  | 9  | 11 | 9  | 59    | 7.34  | 243 | 9  |
| F6WQW2     | Ran-specifi27.6978417  | 6  | 12 | 6  | 31.9  | 8.75  | 280 | 6  |
| H7C2Q8     | EBNA1 bindi26.8698061  | 11 | 18 | 11 | 40.7  | 9.98  | 343 | 11 |
| Q8IYD1     | Eukaryotic 18.7898089  | 10 | 15 | 1  | 68.8  | 5.43  | 313 | 10 |
| AOA024R3W7 | Eukaryotic 48          | 8  | 12 | 8  | 24.7  | 4.67  | 240 | 8  |
| P35659     | Protein DEF25.3333333  | 11 | 16 | 11 | 42.6  | 8.56  | 281 | 11 |
| Q9NYF8     | Bcl-2-assoc13.8043478  | 12 | 17 | 12 | 106.1 | 9.98  | 165 | 12 |
| AOA0S2Z3Y1 | Lectin galc20.6837607  | 8  | 10 | 8  | 65.3  | 5.27  | 373 | 8  |
| Q27J81     | Inverted fc16.0128102  | 12 | 12 | 12 | 135.5 | 5.38  | 261 | 12 |
| AOA087WTW0 | E3 ubiquiti20.3033839  | 13 | 15 | 13 | 96.6  | 8.34  | 298 | 13 |
| P24928     | DNA-directe 8.5786802  | 11 | 12 | 11 | 217   | 7.37  | 229 | 11 |
| P51571     | Translocon- 38.150289  | 7  | 13 | 7  | 19    | 6.15  | 232 | 7  |
| Q53Y97     | Thymidylate46.3258786  | 9  | 14 | 9  | 35.7  | 7.01  | 110 | 9  |
| P61254     | 60S riboson 55.862069  | 14 | 25 | 4  | 17.2  | 10.55 | 322 | 14 |
| O75937     | DnaJ homolc41.1067194  | 7  | 12 | 7  | 29.8  | 9.06  | 63  | 7  |
| Q9NR45     | Sialic acic37.0473538  | 9  | 15 | 9  | 40.3  | 6.74  | 215 | 9  |
| Q86UE4     | Protein LYF20.4467354  | 9  | 13 | 9  | 63.8  | 9.32  | 239 | 9  |
| Q15369     | Elongin-C (64.2857143  | 7  | 13 | 7  | 12.5  | 4.78  | 437 | 7  |
| Q12904     | Aminoacyl 128.8461538  | 8  | 12 | 8  | 34.3  | 8.43  | 201 | 8  |
| P16070     | CD44 antigc10.2425876  | 7  | 13 | 7  | 81.5  | 5.33  | 429 | 7  |
| P50579     | Methionine 28.2426778  | 10 | 16 | 10 | 52.9  | 5.82  | 124 | 10 |
| Q5QJE6     | Deoxynuclec24.0740741  | 12 | 15 | 12 | 84.4  | 6.16  | 228 | 12 |
| O75390     | Citrate syr29.8283262  | 9  | 14 | 9  | 51.7  | 8.32  | 224 | 9  |
| B2R704     | cDNA, FLJ9: 26.034713  | 16 | 21 | 15 | 83.9  | 9.54  | 212 | 16 |
| Q9UHB9     | Signal recc28.2296651  | 13 | 13 | 13 | 70.7  | 8.56  | 255 | 13 |
| B4DUT8     | Calponin 0c45.7575758  | 10 | 22 | 10 | 35.9  | 7.3   | 204 | 10 |
| F6VRR5     | Polymerase 43.1506849  | 13 | 13 | 13 | 48.1  | 9.92  | 188 | 13 |
| P40763     | Signal trar20.1298701  | 10 | 16 | 10 | 88    | 6.3   | 283 | 10 |
| O75607     | Nucleoplasn 45.505618  | 4  | 7  | 4  | 19.3  | 4.63  | 234 | 4  |
| E9PCR7     | 2-oxoglutar21.4836224  | 13 | 24 | 13 | 117.6 | 6.92  | 160 | 13 |
| Q1KMD3     | Heterogenec24.7657296  | 12 | 14 | 12 | 85.1  | 4.91  | 217 | 12 |
| P25788     | Proteasome 41.9607843  | 10 | 14 | 10 | 28.4  | 5.33  | 297 | 10 |
| P50995     | Annexin A1124.3564356  | 10 | 12 | 10 | 54.4  | 7.65  | 185 | 10 |
| B2RDQ3     | cDNA, FLJ9c42.3611111  | 13 | 16 | 12 | 33.7  | 11.25 | 199 | 13 |
| Q9UBB4     | Ataxin-10 (25.6842105  | 8  | 9  | 8  | 53.5  | 5.25  | 325 | 8  |
| O75531     | Barrier-to-66.2921348  | 7  | 10 | 7  | 10.1  | 6.09  | 182 | 7  |
| P62847     | 40S riboson42.8571429  | 9  | 15 | 9  | 15.4  | 10.78 | 291 | 9  |
| B2R6E2     | cDNA, FLJ9:27.2921109  | 9  | 9  | 9  | 51.6  | 5.25  | 149 | 9  |
| P84090     | Enhancer of 62.5       | 8  | 22 | 8  | 12.3  | 5.92  | 366 | 8  |
| E9PAV3     | Nascent pol2.74302214  | 6  | 11 | 6  | 205.3 | 9.58  | 398 | 6  |
| Q8IVT2     | Mitotic int28.4241532  | 13 | 19 | 13 | 75.3  | 6.83  | 223 | 13 |
| B2R774     | cDNA, FLJ9:24.3137255  | 8  | 10 | 8  | 57.5  | 6.77  | 198 | 8  |
| Q92922     | SWI/SNF con13.3031674  | 14 | 16 | 7  | 122.8 | 5.76  | 187 | 14 |
| Q9Y295     | Development35.4223433  | 12 | 13 | 11 | 40.5  | 8.9   | 239 | 12 |
| E7EUC7     | UTP—gluco:29.4003868   | 12 | 14 | 12 | 57.8  | 8.13  | 227 | 12 |
| AOA024R6S1 | DnaJ (Hsp4c26.9417476  | 8  | 12 | 8  | 45.7  | 6.48  | 203 | 8  |
| P61289     | Proteasome 40.9448819  | 10 | 16 | 10 | 29.5  | 5.95  | 270 | 10 |
| P58546     | Myotrophin 68.6440678  | 6  | 10 | 6  | 12.9  | 5.52  | 123 | 6  |
| Q14498     | RNA-binding20.5660377  | 8  | 10 | 8  | 59.3  | 10.1  | 303 | 8  |
| X5D8S6     | Adenylosucc35.3305785  | 11 | 11 | 11 | 54.9  | 7.11  | 77  | 11 |
| Q15424     | Scaffold at20.8743169  | 13 | 16 | 8  | 102.6 | 5.47  | 173 | 13 |
| AOA024R1V4 | 60S riboson48.5294118  | 7  | 19 | 7  | 15.8  | 10.56 | 297 | 7  |
| Q13561     | Dynactin st40.8977556  | 10 | 13 | 10 | 44.2  | 5.21  | 118 | 10 |
| Q59EL2     | COP9 consti30.3769401  | 8  | 9  | 8  | 52.5  | 5.54  | 151 | 8  |
| O15347     | High mobili 33.5       | 9  | 14 | 9  | 23    | 8.37  | 190 | 9  |
| AOA0S4T3F5 | MHC class 119.1256831  | 5  | 15 | 2  | 40.9  | 7.2   | 267 | 5  |
| Q5U5J2     | CSNK2A1 prc29.4710327  | 9  | 11 | 8  | 45.9  | 7.96  | 156 | 9  |
| Q9BXP5     | Serrate RNf19.4063927  | 12 | 13 | 12 | 100.6 | 5.96  | 202 | 12 |
| Q10713     | Mitochondri25.9047619  | 11 | 13 | 11 | 58.2  | 6.92  | 168 | 11 |
| P42285     | Superkiller14.2994242  | 11 | 14 | 11 | 117.7 | 6.52  | 176 | 11 |
| F8W727     | 60S riboson49.0196078  | 10 | 24 | 10 | 18    | 10.59 | 337 | 10 |
| AOA087WYT3 | Prostaglanc25.6097561  | 6  | 12 | 6  | 19.1  | 4.55  | 247 | 6  |
| AOA024R4E5 | High densiti16.7981073 | 15 | 16 | 15 | 141.4 | 6.87  | 250 | 15 |
| P52948     | Nuclear por9.96147496  | 13 | 16 | 13 | 197.5 | 6.4   | 196 | 13 |
| G3V0E4     | Mitochondri 30         | 11 | 14 | 10 | 54.2  | 6.83  | 309 | 11 |
| P20020     | Plasma mem12.0826709   | 9  | 11 | 5  | 138.7 | 6.04  | 199 | 9  |
| Q96C19     | EF-hand don47.0833333  | 12 | 13 | 10 | 26.7  | 5.2   | 216 | 12 |
| P46781     | 40S riboson 50         | 16 | 23 | 16 | 22.6  | 10.65 | 265 | 16 |
| Q15008     | 26S proteas28.7917738  | 9  | 14 | 9  | 45.5  | 5.62  | 244 | 9  |
| V9HWH9     | Protein S1c56.1904762  | 8  | 21 | 8  | 11.7  | 7.12  | 465 | 8  |
| B3KMV5     | cDNA FLJ12f13.0434783  | 9  | 9  | 9  | 122.8 | 5.85  | 138 | 9  |
| Q32MZ4     | Leucine-ric18.5643564  | 10 | 13 | 9  | 89.2  | 4.65  | 196 | 10 |

|            |             |              |    |    |    |       |       |     |    |
|------------|-------------|--------------|----|----|----|-------|-------|-----|----|
| LOR849     | Alternative | 13.9175258   | 8  | 14 | 1  | 42.3  | 5.92  | 298 | 8  |
| P50238     | Cysteine-ri | 67.5324675   | 4  | 16 | 4  | 8.5   | 8.75  | 86  | 4  |
| P02795     | Metallothio | 67.2131148   | 4  | 13 | 1  | 6     | 7.83  | 520 | 4  |
| A6NHL2     | Tubulin al  | 11.8834081   | 8  | 18 | 1  | 49.9  | 6.05  | 406 | 8  |
| Q9Y2T3     | Guanine de  | 34.1409692   | 10 | 12 | 10 | 51    | 5.68  | 232 | 10 |
| AOA024R7M0 | Transmembr  | 19.1489362   | 5  | 9  | 4  | 27.3  | 8.02  | 249 | 5  |
| P55735     | Protein SEC | 35.4037267   | 5  | 8  | 5  | 35.5  | 5.48  | 259 | 5  |
| AOA024QYX3 | RNA binding | 54.1401274   | 5  | 8  | 5  | 17.2  | 8.91  | 154 | 5  |
| P51148     | Ras-relate  | 37.037037    | 7  | 13 | 6  | 23.5  | 8.41  | 430 | 7  |
| Q5T5C7     | Serine--tr  | 18.8432836   | 8  | 11 | 8  | 61.3  | 7.06  | 187 | 8  |
| Q9NW13     | RNA-binding | 20.0263505   | 14 | 15 | 14 | 85.7  | 9.22  | 262 | 14 |
| AOA140VJK1 | Testicular  | 33.7313433   | 9  | 11 | 9  | 37.4  | 5.39  | 98  | 9  |
| P61163     | Alpha-cent  | 45.212766    | 12 | 13 | 11 | 42.6  | 6.64  | 159 | 12 |
| Q5T9B7     | Adenylate   | 137.1428571  | 7  | 8  | 7  | 23.4  | 8.6   | 202 | 7  |
| P13674     | Prolyl 4-h  | 16.1048689   | 6  | 9  | 6  | 61    | 6.01  | 139 | 6  |
| Q5U0A0     | Proteasome  | 39.0041494   | 8  | 13 | 8  | 26.4  | 4.79  | 407 | 8  |
| E5RJD8     | Tubulin-sp  | 42.8571429   | 6  | 13 | 6  | 14.3  | 5.12  | 311 | 6  |
| P35908     | Keratin, t  | 11.1111111   | 8  | 18 | 3  | 65.4  | 8     | 320 | 8  |
| P49721     | Proteasome  | 40.7960199   | 11 | 15 | 11 | 22.8  | 7.02  | 220 | 11 |
| P18085     | ADP-ribosy  | 157.7777778  | 8  | 9  | 4  | 20.5  | 7.14  | 170 | 8  |
| P26447     | Protein S1  | 49.5049505   | 9  | 29 | 9  | 11.7  | 6.11  | 521 | 9  |
| AOA087WUL9 | 26S protea  | 26.5251989   | 9  | 10 | 9  | 42.7  | 5.91  | 163 | 9  |
| O60716     | Catenin del | 16.1157025   | 13 | 13 | 13 | 108.1 | 6.23  | 182 | 13 |
| Q59FR8     | Galectin (F | 31.3953488   | 7  | 16 | 7  | 27.1  | 8.41  | 242 | 7  |
| AOA0C4DGG5 | Calpain sm  | 29.5031056   | 8  | 13 | 8  | 33.8  | 6.23  | 219 | 8  |
| O00429     | Dynamin-1-  | 119.1576087  | 10 | 13 | 1  | 81.8  | 6.81  | 223 | 10 |
| B2R983     | cDNA, FLJ9  | 36.9294606   | 11 | 17 | 11 | 27.5  | 6.6   | 207 | 11 |
| P60903     | Protein S1  | 52.5773196   | 5  | 12 | 5  | 11.2  | 7.37  | 183 | 5  |
| B2R6U8     | cDNA, FLJ9  | 36.5638767   | 8  | 12 | 8  | 26.2  | 8.82  | 100 | 8  |
| Q92804     | TATA-bind   | 28.8851351   | 9  | 11 | 8  | 61.8  | 8.02  | 183 | 9  |
| Q9NSD9     | Phenylalani | 26.9949066   | 13 | 16 | 13 | 66.1  | 6.84  | 163 | 13 |
| Q6FGH9     | DNCL1 prote | 56.1797753   | 5  | 12 | 5  | 10.4  | 7.4   | 215 | 5  |
| A8K897     | Nuclear por | 22.2222222   | 13 | 13 | 13 | 93.3  | 5.77  | 186 | 13 |
| Q9NQW6     | Anillin OS  | 17.7935943   | 15 | 20 | 15 | 124.1 | 8.07  | 185 | 15 |
| Q07021     | Complement  | 29.0780142   | 4  | 9  | 4  | 31.3  | 4.84  | 371 | 4  |
| Q13423     | NAD(P) trar | 14.825046    | 12 | 14 | 12 | 113.8 | 8.09  | 138 | 12 |
| AOA024R8A2 | GTPase acti | 10.0201748   | 10 | 12 | 10 | 166.1 | 5.21  | 202 | 10 |
| Q9BRP8     | Partner of  | 68.627451    | 10 | 14 | 10 | 22.6  | 9.45  | 172 | 10 |
| P35270     | Sepiapterin | 40.9961686   | 7  | 9  | 7  | 28    | 8.05  | 278 | 7  |
| Q96QV6     | Histone H2  | 42.7480916   | 6  | 20 | 2  | 14.2  | 10.86 | 318 | 6  |
| Q8TDN6     | Ribosome bi | 42.2096317   | 11 | 15 | 11 | 41.4  | 9.92  | 118 | 11 |
| D3DQRO     | Protein kir | 28.7058824   | 11 | 11 | 11 | 48.5  | 6.28  | 243 | 11 |
| O60869     | Endothelial | 51.3513514   | 7  | 12 | 7  | 16.4  | 9.95  | 186 | 7  |
| P62318     | Small nucle | 50           | 6  | 11 | 6  | 13.9  | 10.32 | 130 | 6  |
| O43818     | U3 small nt | 22.9473684   | 8  | 10 | 8  | 51.8  | 7.85  | 163 | 8  |
| P47813     | Eukaryotic  | 40.2777778   | 6  | 15 | 6  | 16.5  | 5.24  | 208 | 6  |
| Q9NZB2     | Constitutiv | 15.1162791   | 11 | 13 | 11 | 121.8 | 8.88  | 156 | 11 |
| Q71V07     | Signal rec  | 22.2056632   | 10 | 14 | 10 | 74.6  | 9.19  | 204 | 10 |
| B7ZM99     | MTHFD1L pr  | 17.4668029   | 13 | 14 | 12 | 105.8 | 8.06  | 136 | 13 |
| AOA024R7I3 | RAB8A, mem  | 42.5120773   | 11 | 19 | 4  | 23.7  | 9.07  | 378 | 11 |
| V9HWH1     | Epididymis  | 23.4828496   | 7  | 11 | 7  | 42.7  | 6.28  | 232 | 7  |
| P21964     | Catechol O  | 36.1623616   | 6  | 9  | 6  | 30    | 5.47  | 215 | 6  |
| Q8TEM1     | Nuclear por | 7.9491256    | 11 | 12 | 11 | 205   | 6.81  | 214 | 11 |
| Q8TCS8     | Polyribonuc | 19.6679438   | 13 | 14 | 13 | 85.9  | 7.77  | 145 | 13 |
| AOMNP2     | CDW11/WDR   | 5733.6134454 | 8  | 13 | 8  | 39.3  | 8.1   | 136 | 8  |
| AOA0S2Z489 | Proteasome  | 24.5614035   | 9  | 11 | 9  | 52.9  | 7.65  | 244 | 9  |
| P61160     | Actin-relat | 28.9340102   | 11 | 12 | 10 | 44.7  | 6.74  | 181 | 11 |
| A4D2P0     | Ras-relate  | 42.6540284   | 10 | 17 | 9  | 23.5  | 8.63  | 264 | 10 |
| Q8NBJ5     | Procollagen | 21.7041801   | 11 | 15 | 11 | 71.6  | 7.31  | 232 | 11 |
| Q59EL4     | PRPF4 prote | 27.1880819   | 11 | 13 | 11 | 60    | 7.56  | 135 | 11 |
| P13647     | Keratin, t  | 12.0338983   | 9  | 20 | 2  | 62.3  | 7.74  | 274 | 9  |
| AOA024R2W3 | Protein kir | 30.4455446   | 11 | 13 | 11 | 45.5  | 5.07  | 141 | 11 |
| P08240     | Signal rec  | 13.6363636   | 6  | 8  | 6  | 69.8  | 8.95  | 243 | 6  |
| AOA0B4J2C3 | Translatior | 57.3604061   | 8  | 15 | 8  | 22.6  | 5.24  | 217 | 8  |
| Q16630     | Cleavage ar | 14.5190563   | 7  | 10 | 7  | 59.2  | 7.15  | 218 | 7  |
| Q9UG63     | ATP-binding | 19.1011236   | 11 | 14 | 11 | 71.2  | 7.37  | 168 | 11 |
| AOA0AOMRI2 | Sorting ne  | 33.7320574   | 10 | 10 | 10 | 47.8  | 6.43  | 209 | 10 |
| Q92522     | Histone H1  | 29.1079812   | 7  | 13 | 7  | 22.5  | 10.76 | 179 | 7  |
| P49720     | Proteasome  | 39.5121951   | 7  | 9  | 7  | 22.9  | 6.55  | 224 | 7  |
| Q9BTT0     | Acidic leuc | 21.641791    | 6  | 9  | 5  | 30.7  | 3.85  | 246 | 6  |
| Q9UHV9     | Prefoldin   | 59.0909091   | 8  | 11 | 8  | 16.6  | 6.58  | 216 | 8  |
| AOA024QZY1 | JTV1 gene,  | 40.625       | 9  | 14 | 9  | 35.3  | 8.22  | 248 | 9  |
| AOA140VJJ2 | S-formylgl  | 43.2624113   | 8  | 13 | 8  | 31.4  | 7.02  | 145 | 8  |

|            |             |             |    |    |    |       |       |     |    |
|------------|-------------|-------------|----|----|----|-------|-------|-----|----|
| Q01130     | Serine/argi | 30.7692308  | 8  | 12 | 8  | 25.5  | 11.85 | 235 | 8  |
| P30043     | Flavin red  | 53.8834951  | 9  | 13 | 9  | 22.1  | 7.65  | 175 | 9  |
| A0A1D8MAN5 | MHC class   | 120.2185792 | 5  | 14 | 2  | 40.8  | 6.62  | 284 | 5  |
| Q9UNX3     | 60S riboson | 53.7931034  | 12 | 22 | 2  | 17.2  | 10.55 | 243 | 12 |
| Q5SSJ5     | Heterochron | 25.4972875  | 11 | 15 | 11 | 61.2  | 9.67  | 100 | 11 |
| P62854     | 40S riboson | 44.3478261  | 5  | 14 | 5  | 13    | 11    | 212 | 5  |
| P35221     | Catenin alj | 12.4724062  | 8  | 8  | 8  | 100   | 6.29  | 204 | 8  |
| Q9V6E2     | Basic leuci | 24.8210024  | 10 | 12 | 9  | 48.1  | 6.68  | 167 | 10 |
| Q8N684     | Cleavage ar | 19.5329087  | 7  | 11 | 7  | 52    | 8     | 214 | 7  |
| G8JLD5     | Dynamin-1   | 119.9438202 | 10 | 12 | 1  | 79.6  | 7.08  | 176 | 10 |
| A8K517     | Ribosomal r | 48.951049   | 7  | 18 | 7  | 15.8  | 10.49 | 227 | 7  |
| MOQYS1     | 60S riboson | 38.5714286  | 11 | 22 | 11 | 24.2  | 10.86 | 244 | 11 |
| P11172     | Uridine 5'  | 20.8333333  | 8  | 10 | 8  | 52.2  | 7.24  | 180 | 8  |
| P13995     | Bifunctione | 23.7142857  | 7  | 9  | 7  | 37.9  | 8.73  | 127 | 7  |
| PODN79     | Cystathioni | 26.8602541  | 9  | 11 | 9  | 60.5  | 6.65  | 166 | 9  |
| A8K548     | cDNA FLJ75  | 10.1769912  | 6  | 8  | 6  | 119.6 | 4.34  | 225 | 6  |
| B4DUC8     | S-methyl-5' | 33.6666667  | 7  | 11 | 7  | 33.2  | 7.46  | 134 | 7  |
| Q02880     | DNA topoisc | 6.51906519  | 10 | 14 | 3  | 183.2 | 8     | 200 | 10 |
| P31350     | Ribonucleoe | 31.8766067  | 10 | 13 | 10 | 44.8  | 5.38  | 192 | 10 |
| Q15645     | Pachytene c | 29.8611111  | 10 | 11 | 10 | 48.5  | 6.09  | 175 | 10 |
| P28838     | Cytosol ami | 28.5163776  | 10 | 12 | 10 | 56.1  | 7.93  | 134 | 10 |
| A0A0S2Z569 | DAZ associ  | 31.2039312  | 9  | 12 | 9  | 43.4  | 8.56  | 142 | 9  |
| B2R665     | cDNA, FLJ9  | 21.978022   | 9  | 14 | 9  | 59.2  | 4.36  | 162 | 9  |
| 000764     | Pyridoxal p | 29.4871795  | 7  | 10 | 7  | 35.1  | 6.13  | 272 | 7  |
| J3KNL6     | Protein tr  | 9.58845991  | 11 | 15 | 11 | 251.7 | 5.8   | 86  | 11 |
| A2VCK8     | Thymosin b  | 90.9090909  | 5  | 16 | 5  | 5.1   | 5.06  | 164 | 5  |
| Q8N1G4     | Leucine-ric | 26.7581475  | 11 | 13 | 11 | 63.4  | 8.28  | 146 | 11 |
| P43246     | DNA mismat  | 18.2012848  | 15 | 16 | 15 | 104.7 | 5.77  | 192 | 15 |
| 095292     | Vesicle-as  | 49.7942387  | 10 | 15 | 9  | 27.2  | 7.3   | 261 | 10 |
| P36507     | Dual specif | 22.5        | 6  | 8  | 2  | 44.4  | 6.55  | 212 | 6  |
| 075475     | PC4 and SFF | 26.9811321  | 12 | 14 | 10 | 60.1  | 9.13  | 190 | 12 |
| Q9BUQ8     | Probable A1 | 15.2439024  | 10 | 13 | 10 | 95.5  | 9.55  | 122 | 10 |
| A1L0T0     | Acetolactat | 17.0886076  | 7  | 8  | 7  | 67.8  | 8.15  | 207 | 7  |
| Q5STK2     | Prefoldin   | 69.7674419  | 10 | 13 | 10 | 14.6  | 8.88  | 189 | 10 |
| V9HWA6     | Epididymis  | 52.7272727  | 10 | 14 | 8  | 18.5  | 7.85  | 267 | 10 |
| BOQZ18     | Copine-1 O  | 16.6051661  | 8  | 12 | 8  | 59.7  | 6.04  | 167 | 8  |
| Q6YN16     | Hydroxyste  | 27.2727273  | 7  | 9  | 7  | 45.4  | 7.99  | 232 | 7  |
| P19623     | Spermidine  | 44.0397351  | 10 | 10 | 10 | 33.8  | 5.49  | 175 | 10 |
| P62851     | 40S riboson | 39.2        | 8  | 16 | 8  | 13.7  | 10.11 | 265 | 8  |
| P09543     | 2',3'-cycli | 28.0285036  | 7  | 8  | 7  | 47.5  | 9.07  | 94  | 7  |
| Q6IAX2     | RPL21 prote | 45          | 8  | 15 | 8  | 18.6  | 10.49 | 208 | 8  |
| BOYIW6     | Archain 1,  | 27.5362319  | 12 | 15 | 12 | 61.6  | 5.85  | 209 | 12 |
| P60228     | Eukaryotic  | 21.3483146  | 10 | 13 | 10 | 52.2  | 6.04  | 249 | 10 |
| B2R4R9     | HCG26477 O  | 60.8695652  | 6  | 9  | 6  | 7.8   | 10.7  | 144 | 6  |
| Q15056     | Eukaryotic  | 33.0645161  | 9  | 17 | 9  | 27.4  | 7.23  | 140 | 9  |
| Q6P2E9     | Enhancer o  | 18.70806567 | 9  | 10 | 9  | 151.6 | 5.86  | 229 | 9  |
| P00387     | NADH-cytoe  | 31.5614618  | 7  | 10 | 7  | 34.2  | 7.59  | 75  | 7  |
| Q9UK76     | Hematologic | 47.4025974  | 5  | 11 | 5  | 16    | 5.6   | 142 | 5  |
| 075306     | NADH dehydr | 21.3822894  | 7  | 10 | 7  | 52.5  | 7.55  | 150 | 7  |
| E9PMS6     | LIM domain  | 12          | 11 | 12 | 11 | 145.3 | 7.3   | 229 | 11 |
| Q14764     | Major vault | 118.3650616 | 9  | 10 | 9  | 99.3  | 5.48  | 171 | 9  |
| P13645     | Keratin, t  | 19.1780822  | 9  | 12 | 5  | 58.8  | 5.21  | 311 | 9  |
| P61956     | Small ubiq  | 40          | 5  | 13 | 3  | 10.9  | 5.5   | 188 | 5  |
| Q5TEC6     | Histone H3  | 59.5588235  | 11 | 31 | 2  | 15.4  | 11.27 | 297 | 11 |
| P61204     | ADP-ribosyl | 37.5690608  | 5  | 7  | 2  | 20.6  | 7.43  | 156 | 5  |
| P26196     | Probable A1 | 35.4037267  | 11 | 14 | 11 | 54.4  | 8.66  | 125 | 11 |
| Q5R3I4     | Tetratricor | 28.358209   | 10 | 11 | 10 | 52.8  | 5.99  | 203 | 10 |
| P83731     | 60S riboson | 42.0382166  | 8  | 12 | 8  | 17.8  | 11.25 | 285 | 8  |
| 000116     | Alkyldihyd  | 17.781155   | 8  | 8  | 8  | 72.9  | 7.34  | 176 | 8  |
| B2R960     | cDNA, FLJ9  | 24.2214533  | 5  | 9  | 5  | 32.2  | 4.96  | 210 | 5  |
| P62913     | 60S riboson | 47.752809   | 10 | 22 | 3  | 20.2  | 9.6   | 442 | 10 |
| Q9NWH9     | SAFB-like   | 110.8317215 | 10 | 11 | 10 | 117.1 | 7.87  | 153 | 10 |
| 095861     | 3' (2'), 5' | 134.4155844 | 8  | 10 | 8  | 33.4  | 5.69  | 185 | 8  |
| 014975     | Very long-c | 19.6774194  | 8  | 10 | 8  | 70.3  | 8.51  | 104 | 8  |
| P34896     | Serine hydr | 20.9109731  | 8  | 9  | 7  | 53    | 7.71  | 195 | 8  |
| Q96HC4     | PDZ and LIM | 28.5234899  | 10 | 11 | 10 | 63.9  | 8.21  | 185 | 10 |
| Q9UIG0     | Tyrosine-p  | 18.36142953 | 10 | 12 | 10 | 170.8 | 8.48  | 173 | 10 |
| D3DUZ3     | Interferon, | 21.1459754  | 12 | 14 | 12 | 82.4  | 9.32  | 127 | 12 |
| Q9H3K6     | Bola-like r | 80.2325581  | 6  | 10 | 6  | 10.1  | 6.52  | 178 | 6  |
| Q59ETO     | Glucan, br  | 15.2519894  | 10 | 11 | 10 | 86.1  | 6.93  | 181 | 10 |
| Q6IAW5     | CALU protei | 25.0793651  | 6  | 9  | 6  | 37.1  | 4.64  | 76  | 6  |
| A0A140VJP2 | Testicular  | 25.4491018  | 5  | 10 | 5  | 37.5  | 7.36  | 308 | 5  |
| 060488     | Long-chain- | 16.1744023  | 9  | 10 | 6  | 79.1  | 8.38  | 159 | 9  |



|            |              |             |    |    |    |       |       |     |    |
|------------|--------------|-------------|----|----|----|-------|-------|-----|----|
| Q9Y3U8     | 60S ribosom  | 39.047619   | 6  | 13 | 6  | 12.2  | 11.59 | 152 | 6  |
| Q9UKY7     | Protein CDV  | 39.1472868  | 6  | 9  | 6  | 27.3  | 6.4   | 102 | 6  |
| A6NHR9     | Structural   | 7.83042394  | 11 | 11 | 11 | 226.2 | 7.3   | 204 | 11 |
| A8K3F6     | cDNA FLJ77   | 29.1176471  | 6  | 8  | 1  | 37.6  | 6     | 172 | 6  |
| B2RAH7     | cDNA, FLJ9   | 16.6197183  | 8  | 9  | 8  | 80.7  | 5.86  | 197 | 8  |
| P55263     | Adenosine    | 130.9392265 | 8  | 9  | 8  | 40.5  | 6.7   | 132 | 8  |
| AOA087WUB9 | Beta-catenin | 18.3098592  | 9  | 12 | 9  | 65.7  | 5.02  | 164 | 9  |
| P61221     | ATP-binding  | 21.7028381  | 10 | 13 | 10 | 67.3  | 8.34  | 85  | 10 |
| AOA024RDG1 | Vesicle doc  | 12.0582121  | 9  | 12 | 9  | 107.8 | 4.91  | 273 | 9  |
| P48735     | Isocitrate   | 25.6637168  | 10 | 12 | 9  | 50.9  | 8.69  | 184 | 10 |
| B3KML1     | cDNA FLJ11   | 20.0385356  | 8  | 9  | 8  | 58.4  | 5.06  | 241 | 8  |
| Q6DD88     | Atlastin-3   | 21.0720887  | 7  | 7  | 7  | 60.5  | 5.66  | 198 | 7  |
| P52888     | Thimet oli   | 19.1582003  | 10 | 11 | 10 | 78.8  | 6.05  | 104 | 10 |
| 075396     | Vesicle-tr   | 34.4186047  | 7  | 8  | 7  | 24.6  | 6.92  | 275 | 7  |
| Q7L2H7     | Eukaryotic   | 15.7754011  | 6  | 9  | 6  | 42.5  | 5.63  | 294 | 6  |
| A8K8B0     | cDNA FLJ76   | 15.2923538  | 7  | 8  | 3  | 73.5  | 5.1   | 233 | 7  |
| J3QRS3     | Myosin reg   | 44.6327684  | 6  | 7  | 6  | 20.4  | 4.75  | 207 | 6  |
| Q14203     | Dynactin s   | 12.2065728  | 12 | 13 | 12 | 141.6 | 5.81  | 200 | 12 |
| P26368     | Splicing f   | 26.9473684  | 8  | 11 | 8  | 53.5  | 9.09  | 94  | 8  |
| P61964     | WD repeat    | 38.9221557  | 8  | 11 | 8  | 36.6  | 8.27  | 103 | 8  |
| Q96GQ7     | Probable A   | 117.0854271 | 11 | 11 | 11 | 89.8  | 9.28  | 246 | 11 |
| Q05519     | Serine/arg   | 12.3966942  | 4  | 8  | 4  | 53.5  | 10.52 | 213 | 4  |
| Q6FGS1     | TPD52L2 pr   | 49.5145631  | 7  | 8  | 7  | 22.2  | 5.36  | 180 | 7  |
| Q96P70     | Importin-9   | 12.0076849  | 8  | 10 | 8  | 115.9 | 4.81  | 197 | 8  |
| Q6NUK1     | Calcium-bi   | 21.1740042  | 10 | 13 | 10 | 53.3  | 6.33  | 162 | 10 |
| P52815     | 39S ribosom  | 40.4040404  | 7  | 13 | 7  | 21.3  | 8.87  | 112 | 7  |
| P50402     | Emerin OS    | 33.0708661  | 8  | 11 | 8  | 29    | 5.5   | 164 | 8  |
| 060701     | UDP-glucose  | 21.2550607  | 7  | 7  | 7  | 55    | 7.12  | 192 | 7  |
| B2R7B5     | cDNA, FLJ9   | 16.9300226  | 6  | 17 | 6  | 48.2  | 8.66  | 235 | 6  |
| Q13045     | Protein flil | 1.0323089   | 10 | 10 | 10 | 144.7 | 6.05  | 162 | 10 |
| Q8WWM7     | Ataxin-2-l   | 115.1627907 | 10 | 15 | 10 | 113.3 | 8.59  | 94  | 10 |
| B2R791     | cDNA, FLJ9   | 14.0556369  | 8  | 11 | 8  | 77.5  | 9.5   | 182 | 8  |
| H7BY55     | Complement   | 18.9090909  | 8  | 16 | 8  | 58.9  | 8.78  | 80  | 8  |
| J3KQ48     | Peptidyl-t   | 46.1111111  | 6  | 8  | 6  | 19.3  | 8.73  | 182 | 6  |
| AOA0G2JH68 | Protein di   | 9.82704403  | 13 | 13 | 13 | 141.3 | 5.39  | 203 | 13 |
| Q9GZS3     | WD repeat    | 38.0327869  | 7  | 9  | 7  | 33.6  | 5.47  | 72  | 7  |
| Q6IPH7     | RPL14 prote  | 36.3636364  | 9  | 13 | 1  | 23.8  | 10.93 | 257 | 9  |
| Q12996     | Cleavage st  | 16.5969317  | 7  | 7  | 7  | 82.9  | 8.12  | 208 | 7  |
| AOA024R6I3 | Testicular   | 31.9634703  | 7  | 7  | 7  | 25    | 7.44  | 170 | 7  |
| AOA140VKE9 | Testis tis   | 17.2413793  | 7  | 8  | 7  | 71.4  | 5.2   | 169 | 7  |
| AOMNN4     | CDW3/SMU1    | (17.5438596 | 8  | 10 | 8  | 57.5  | 7.18  | 189 | 8  |
| Q9H1E3     | Nuclear ubi  | 16.4609053  | 5  | 11 | 5  | 27.3  | 5.08  | 134 | 5  |
| P84085     | ADP-ribosyl  | 37.7777778  | 5  | 6  | 1  | 20.5  | 6.79  | 115 | 5  |
| Q9Y2L1     | Exosome con  | 15.7620042  | 9  | 11 | 9  | 108.9 | 7.14  | 210 | 9  |
| V9HW91     | Epididymis   | 36.9565217  | 6  | 7  | 6  | 30.6  | 7.21  | 161 | 6  |
| Q5VZU9     | Tripeptidyl  | 110.3803487 | 10 | 12 | 10 | 139.7 | 6.52  | 114 | 10 |
| P25815     | Protein S1   | (61.0526316 | 5  | 8  | 5  | 10.4  | 4.88  | 390 | 5  |
| Q9UJU6     | Drebrin-lil  | 29.0697674  | 10 | 10 | 3  | 48.2  | 5.05  | 199 | 10 |
| P52294     | Importin st  | 12.4535316  | 6  | 10 | 1  | 60.2  | 5.01  | 189 | 6  |
| P51149     | Ras-relate   | 36.2318841  | 6  | 9  | 6  | 23.5  | 6.7   | 193 | 6  |
| 075131     | Copine-3 O   | 20.8566108  | 9  | 10 | 9  | 60.1  | 5.85  | 125 | 9  |
| P48960     | CD97 antige  | 11.257485   | 6  | 8  | 6  | 91.8  | 6.87  | 146 | 6  |
| Q15436     | Protein tr   | 15.0326797  | 8  | 11 | 8  | 86.1  | 7.08  | 156 | 8  |
| POC0S5     | Histone H2f  | 31.25       | 5  | 22 | 3  | 13.5  | 10.58 | 402 | 5  |
| H3BN98     | Uncharacter  | 27.4261603  | 8  | 13 | 3  | 27.2  | 9.55  | 228 | 8  |
| P35249     | Replicatio   | 31.6804408  | 9  | 12 | 9  | 39.7  | 8.02  | 107 | 9  |
| E9PI68     | Signal pept  | 28.7937743  | 5  | 8  | 5  | 28.5  | 8.79  | 236 | 5  |
| P55010     | Eukaryotic   | 25.7540603  | 12 | 16 | 12 | 49.2  | 5.58  | 182 | 12 |
| Q9NQ29     | Putative R   | 26.9541779  | 10 | 13 | 4  | 43.7  | 9.92  | 132 | 10 |
| F8VXC8     | SWI/SNF con  | 8.6746988   | 9  | 10 | 2  | 136.1 | 5.71  | 213 | 9  |
| P20073     | Annexin A7   | 21.5163934  | 8  | 10 | 8  | 52.7  | 5.68  | 155 | 8  |
| Q9GZZ1     | N-alpha-acc  | 54.4378698  | 7  | 11 | 7  | 19.4  | 8.81  | 147 | 7  |
| P51114     | Fragile X n  | 20.6119163  | 8  | 11 | 1  | 69.7  | 6.15  | 168 | 8  |
| P06132     | Uroporphyr   | 22.0708447  | 6  | 7  | 6  | 40.8  | 6.14  | 214 | 6  |
| AOA140VJW2 | Stathmin O   | 32.183908   | 7  | 21 | 7  | 19.8  | 7.02  | 318 | 7  |
| A6NFX8     | ADP-sugar    | 131.4655172 | 9  | 11 | 9  | 25.9  | 5.19  | 114 | 9  |
| Q15182     | Small nucle  | 24.2105263  | 7  | 11 | 7  | 29.7  | 10.07 | 104 | 7  |
| P30876     | DNA-direct   | 10.5621806  | 9  | 11 | 9  | 133.8 | 6.87  | 166 | 9  |
| Q96E11     | Ribosome-r   | 35.4961832  | 6  | 8  | 6  | 29.3  | 9.79  | 209 | 6  |
| 094826     | Mitochondri  | 18.9144737  | 9  | 13 | 9  | 67.4  | 7.12  | 142 | 9  |
| P49756     | RNA-binding  | 14.1162515  | 12 | 14 | 12 | 100.1 | 6.32  | 140 | 12 |
| AOA0S2Z5I7 | Shwachman-f  | 37.6        | 8  | 9  | 8  | 28.7  | 8.75  | 156 | 8  |
| Q09161     | Nuclear cap  | 12.0253165  | 6  | 8  | 6  | 91.8  | 6.43  | 93  | 6  |

|            |              |              |    |    |    |       |      |     |    |
|------------|--------------|--------------|----|----|----|-------|------|-----|----|
| HOYHGO     | Uncharacteri | 13.1931166   | 7  | 9  | 7  | 59.1  | 8.59 | 281 | 7  |
| A0A0KOK1L8 | Epididymis   | 43.373494    | 10 | 14 | 10 | 28.7  | 6.02 | 159 | 10 |
| A0A140VJX3 | Sulfurtrans  | 30.976431    | 6  | 8  | 6  | 33.2  | 6.6  | 185 | 6  |
| Q14739     | Lamin-B rec  | 8.29268293   | 4  | 8  | 4  | 70.7  | 9.36 | 101 | 4  |
| P18583     | Protein S0   | 9.64550701   | 11 | 17 | 11 | 263.7 | 5.64 | 124 | 11 |
| Q9NZ01     | Very-long    | c15.9090909  | 6  | 11 | 6  | 36    | 9.45 | 118 | 6  |
| Q15637     | Splicing f   | 21.5962441   | 12 | 17 | 12 | 68.3  | 8.98 | 195 | 12 |
| Q6FGH5     | RPS21 prot   | 66.2650602   | 5  | 7  | 5  | 9.1   | 8.5  | 218 | 5  |
| P35250     | Replicatio   | 26.8361582   | 6  | 7  | 6  | 39.1  | 6.44 | 196 | 6  |
| B1AKJ5     | Nardilysin   | 9.68006563   | 9  | 11 | 9  | 139.3 | 5    | 121 | 9  |
| Q9UBK8     | Methionine   | 16           | 8  | 10 | 8  | 80.4  | 6.49 | 132 | 8  |
| P40261     | Nicotinam    | ic39.3939394 | 7  | 9  | 7  | 29.6  | 5.74 | 175 | 7  |
| P36542     | ATP syntha   | 23.8255034   | 8  | 9  | 8  | 33    | 9.22 | 259 | 8  |
| P42224     | Signal trar  | 11.2         | 6  | 10 | 6  | 87.3  | 6.05 | 141 | 6  |
| Q16698     | 2,4-dienoyl  | 26.8656716   | 6  | 7  | 6  | 36    | 9.28 | 164 | 6  |
| P09661     | U2 small nt  | 29.0196078   | 7  | 9  | 7  | 28.4  | 8.62 | 213 | 7  |
| O94776     | Metastasis   | -23.6526946  | 11 | 13 | 10 | 75    | 9.66 | 130 | 11 |
| B2RBI2     | cDNA, FLJ9   | 20.4545455   | 7  | 8  | 7  | 39.9  | 4.53 | 125 | 7  |
| Q8NFH9     | MLL/SEPTIN   | 12.7012522   | 4  | 7  | 3  | 63.1  | 8.02 | 101 | 4  |
| B4DEG7     | cDNA FLJ59   | 22.4168126   | 9  | 10 | 9  | 65.4  | 9.69 | 159 | 9  |
| Q4LE38     | IKBKAP vari  | 9.09090909   | 9  | 9  | 9  | 151.4 | 6    | 186 | 9  |
| Q9UKX7     | Nuclear poi  | 23.7179487   | 6  | 9  | 6  | 50.1  | 7.06 | 115 | 6  |
| Q6FIE5     | PHP14 prote  | 63.2         | 5  | 8  | 5  | 13.8  | 6.07 | 200 | 5  |
| P30085     | UMP-CMP kir  | 51.0204082   | 9  | 12 | 9  | 22.2  | 5.57 | 143 | 9  |
| Q3LXA3     | Triokinase/  | 17.9130435   | 6  | 6  | 6  | 58.9  | 7.49 | 154 | 6  |
| 000273     | DNA fragmer  | 27.1903323   | 6  | 9  | 6  | 36.5  | 4.79 | 194 | 6  |
| Q96KP4     | Cytosolic r  | 31.3684211   | 11 | 14 | 11 | 52.8  | 5.97 | 93  | 11 |
| B2RNR6     | Zinc finger  | 10.2420857   | 7  | 7  | 7  | 116.9 | 9.04 | 212 | 7  |
| B2R7E8     | cDNA, FLJ9   | 38.8888889   | 8  | 10 | 8  | 29.2  | 6.15 | 81  | 8  |
| Q9UMX0     | Ubiquilin-1  | 10.8658744   | 6  | 8  | 6  | 62.5  | 5.11 | 213 | 6  |
| V9HW41     | Epididymis   | 48.0263158   | 8  | 13 | 8  | 17.1  | 6.57 | 183 | 8  |
| S4R359     | Heterogenec  | 68           | 4  | 7  | 1  | 10.7  | 5.38 | 206 | 4  |
| A0A024R5X7 | ClpX caseir  | 22.5908373   | 9  | 9  | 9  | 69.2  | 7.58 | 109 | 9  |
| B3KXW5     | cDNA FLJ461  | 10.295858    | 7  | 9  | 7  | 94.1  | 7.05 | 203 | 7  |
| Q53GL6     | RNA binding  | 42.6710098   | 8  | 10 | 8  | 32.5  | 9.17 | 127 | 8  |
| P28072     | Proteasome   | 33.8912134   | 5  | 12 | 5  | 25.3  | 4.92 | 172 | 5  |
| O95831     | Apoptosis-i  | 15.3344209   | 6  | 7  | 6  | 66.9  | 8.95 | 99  | 6  |
| P51572     | B-cell rece  | 36.1788618   | 9  | 13 | 9  | 28    | 8.44 | 179 | 9  |
| B2RAR2     | cDNA, FLJ9   | 23.7864078   | 7  | 9  | 7  | 46.6  | 7.18 | 148 | 7  |
| O43681     | ATPase ASN   | 27.8735632   | 7  | 10 | 7  | 38.8  | 4.91 | 190 | 7  |
| Q9BYG3     | MKI67 FHA    | c30.3754266  | 6  | 7  | 6  | 34.2  | 9.88 | 147 | 6  |
| P11177     | Pyruvate de  | 28.1337047   | 10 | 11 | 10 | 39.2  | 6.65 | 233 | 10 |
| A0A1BOGUA3 | KIF1-bindir  | 16.873065    | 8  | 9  | 8  | 74.7  | 5.76 | 186 | 8  |
| O75822     | Eukaryotic   | 27.9069767   | 6  | 8  | 6  | 29    | 4.83 | 197 | 6  |
| Q9P287     | BRCA2 and    | (21.9745223  | 5  | 6  | 5  | 36    | 4.61 | 273 | 5  |
| Q9UJZ1     | Stomatin-li  | 26.9662921   | 5  | 5  | 5  | 38.5  | 7.39 | 175 | 5  |
| Q9H4B7     | Tubulin bet  | 10.6430155   | 6  | 38 | 1  | 50.3  | 5.17 | 648 | 6  |
| 000487     | 26S protea   | s23.5483871  | 5  | 8  | 5  | 34.6  | 6.52 | 181 | 5  |
| MOQXB4     | Coatomer p   | 26.2839879   | 5  | 6  | 5  | 36.9  | 5.16 | 125 | 5  |
| Q6IBR2     | FARSLA prot  | 20.4724409   | 9  | 10 | 9  | 57.5  | 7.8  | 222 | 9  |
| Q14690     | Protein RRF  | 7.48262961   | 10 | 13 | 10 | 208.6 | 8.87 | 140 | 10 |
| P50213     | Isocitrate   | 24.0437158   | 7  | 9  | 7  | 39.6  | 6.92 | 136 | 7  |
| P23193     | Transcripti  | 28.5714286   | 6  | 7  | 6  | 33.9  | 8.38 | 187 | 6  |
| O75947     | ATP syntha   | s57.7639752  | 7  | 9  | 7  | 18.5  | 5.3  | 141 | 7  |
| Q15370     | Elongin-B    | (58.4745763  | 5  | 8  | 5  | 13.1  | 4.88 | 63  | 5  |
| D6REX3     | Protein tr   | 10.6314948   | 9  | 12 | 9  | 136.1 | 6.98 | 94  | 9  |
| P46063     | ATP-depend   | 16.1787365   | 8  | 10 | 8  | 73.4  | 7.88 | 137 | 8  |
| Q59EN5     | Prosaposin   | 19.0566038   | 9  | 12 | 9  | 58.7  | 5.1  | 133 | 9  |
| Q02818     | Nucleobindi  | 18.6550976   | 7  | 9  | 6  | 53.8  | 5.25 | 94  | 7  |
| D3DTH7     | Myosin IC,   | 12.7610209   | 10 | 11 | 1  | 98.9  | 9.42 | 149 | 10 |
| Q96A33     | Coiled-coil  | 18.6335404   | 9  | 10 | 9  | 55.8  | 4.87 | 135 | 9  |
| Q9ULC4     | Malignant    | 146.4088398  | 6  | 8  | 6  | 20.5  | 8.82 | 195 | 6  |
| A8K964     | cDNA FLJ75   | c10.5997211  | 7  | 10 | 7  | 81.5  | 7.37 | 75  | 7  |
| Q9NYU2     | UDP-glucos   | 7.13826367   | 7  | 7  | 7  | 177.1 | 5.63 | 178 | 7  |
| A0A140VJK2 | Glycerol-3-  | 13.8927098   | 7  | 7  | 7  | 80.8  | 7.53 | 180 | 7  |
| P53985     | Monocarboxy  | 7.2          | 4  | 9  | 4  | 53.9  | 8.66 | 97  | 4  |
| E9PF18     | Hydroxyacyl  | 30.5031447   | 8  | 11 | 1  | 35.2  | 7.21 | 82  | 8  |
| P41227     | N-alpha-acc  | 20.8510638   | 5  | 7  | 5  | 26.4  | 5.64 | 125 | 5  |
| Q14694     | Ubiquitin    | c14.7869674  | 8  | 10 | 8  | 87.1  | 5.31 | 99  | 8  |
| Q5JTV8     | Torsin-1A-i  | 17.1526587   | 7  | 10 | 7  | 66.2  | 8.18 | 135 | 7  |
| Q08ES8     | Cell growth  | f43.5028249  | 8  | 17 | 1  | 20.1  | 9.6  | 313 | 8  |
| Q15020     | Squamous c   | c14.7455867  | 9  | 9  | 9  | 109.9 | 5.57 | 143 | 9  |
| Q969V3     | Nicalin OS   | =20.9591474  | 8  | 8  | 8  | 62.9  | 6.89 | 203 | 8  |

|            |               |        |          |    |    |    |       |       |     |    |
|------------|---------------|--------|----------|----|----|----|-------|-------|-----|----|
| AOA140VJE8 | AP complex    | 12.    | 4079916  | 12 | 15 | 11 | 105.6 | 5.34  | 109 | 12 |
| O75964     | ATP synthase  | 42.    | 7184466  | 4  | 8  | 4  | 11.4  | 9.64  | 167 | 4  |
| Q01581     | Hydroxymethyl | 22.    | 8846154  | 7  | 8  | 7  | 57.3  | 5.41  | 130 | 7  |
| P00403     | Cytochrome    | 19.    | 3832599  | 5  | 7  | 5  | 25.5  | 4.82  | 140 | 5  |
| AOA087X1Z3 | Proteasome    | 36.    | 2204724  | 9  | 13 | 9  | 29.1  | 6.71  | 95  | 9  |
| Q15843     | NEDD8 OS=Hc   | 38.    | 2716049  | 3  | 7  | 3  | 9.1   | 8.43  | 225 | 3  |
| P30626     | Sorcin OS=F   | 21.    | 7171717  | 3  | 8  | 3  | 21.7  | 5.59  | 195 | 3  |
| B4DEE8     | cDNA FLJ56    | 38.    | 2352941  | 5  | 6  | 5  | 25    | 8.66  | 164 | 5  |
| P08243     | Asparagine    | 17.    | 2905526  | 8  | 8  | 8  | 64.3  | 6.86  | 165 | 8  |
| O96019     | Actin-like    | 24.    | 4755245  | 6  | 7  | 6  | 47.4  | 5.6   | 97  | 6  |
| Q96HE7     | ERO1-like     | 23.    | 9316239  | 9  | 10 | 9  | 54.4  | 5.68  | 182 | 9  |
| AOA024RAD5 | Dolichyl-di   | 20.    | 8333333  | 6  | 7  | 6  | 50.7  | 6.4   | 162 | 6  |
| O43290     | U4/U6.U5      | tr     | 16.625   | 9  | 10 | 9  | 90.2  | 6.13  | 149 | 9  |
| P62495     | Eukaryotic    | 19.    | 4508009  | 6  | 8  | 6  | 49    | 5.71  | 160 | 6  |
| O94906     | Pre-mRNA-p    | 13.    | 2837407  | 10 | 10 | 10 | 106.9 | 8.25  | 182 | 10 |
| Q6LES2     | Annexin (F)   | 24.    | 2990654  | 6  | 8  | 6  | 36.1  | 6.13  | 128 | 6  |
| Q9BXS6     | Nucleolar     | 26.    | 984127   | 8  | 10 | 8  | 49.4  | 9.91  | 127 | 8  |
| Q9Y3B4     | Splicing f    | 48.    | 8        | 6  | 7  | 6  | 14.6  | 9.38  | 182 | 6  |
| Q14684     | Ribosomal     | F20.   | 5804749  | 9  | 11 | 9  | 84.4  | 9.76  | 98  | 9  |
| B2RB06     | cDNA, FLJ9    | 32.    | 4840764  | 8  | 11 | 1  | 34.2  | 8.85  | 82  | 8  |
| AOA024R8R4 | Nuclear prc   | 15.    | 1315789  | 7  | 8  | 7  | 68.1  | 6.38  | 165 | 7  |
| Q6RFH5     | WD repeat-    | 23.    | 3766234  | 7  | 8  | 7  | 42.4  | 8.32  | 187 | 7  |
| Q5TDG3     | WD repeat     | 11.    | 3467656  | 9  | 10 | 9  | 106   | 6.64  | 57  | 9  |
| O95817     | BAG family    | 22.    | 6086957  | 8  | 10 | 8  | 61.6  | 6.95  | 225 | 8  |
| P21912     | Succinate     | c30.   | 7142857  | 8  | 10 | 8  | 31.6  | 8.76  | 137 | 8  |
| Q9NZL4     | Hsp70-bind    | 15.    | 7458564  | 4  | 5  | 4  | 39.4  | 5.21  | 166 | 4  |
| 000743     | Serine/thr    | 19.    | 6721311  | 4  | 5  | 4  | 35.1  | 5.69  | 188 | 4  |
| 000159     | Unconventi    | 10.    | 2539981  | 10 | 11 | 1  | 121.6 | 9.41  | 134 | 10 |
| Q14008     | Cytoskelet    | 6.     | 49606299 | 9  | 9  | 9  | 225.4 | 7.8   | 69  | 9  |
| Q92917     | G patch       | don31. | 9327731  | 8  | 10 | 8  | 52.2  | 6.15  | 110 | 8  |
| Q969G3     | SWI/SNF-re    | 16.    | 7883212  | 5  | 6  | 5  | 46.6  | 4.88  | 209 | 5  |
| Q9H2G2     | STE20-like    | 9.     | 63562753 | 11 | 12 | 11 | 142.6 | 5.15  | 135 | 11 |
| Q9UNF1     | Melanoma-a    | 20.    | 4620462  | 8  | 10 | 8  | 64.9  | 9.32  | 81  | 8  |
| Q96FQ6     | Protein S1    | (28.   | 1553398  | 3  | 5  | 3  | 11.8  | 6.79  | 190 | 3  |
| 000267     | Transcript    | 12.    | 4195032  | 8  | 9  | 8  | 120.9 | 5.06  | 137 | 8  |
| P15559     | NAD(P)H       | def25. | 5474453  | 8  | 9  | 8  | 30.8  | 8.88  | 105 | 8  |
| Q7Z7H5     | Transmembr    | 19.    | 8237885  | 4  | 7  | 3  | 25.9  | 8.28  | 166 | 4  |
| P04732     | Metallothi    | 54.    | 0983607  | 3  | 9  | 1  | 6     | 7.96  | 343 | 3  |
| Q05CW7     | NAT10 prote   | 20.    | 7581227  | 10 | 12 | 1  | 62.3  | 9.26  | 96  | 10 |
| Q5HYL6     | Putative ur   | 27.    | 8409091  | 6  | 9  | 6  | 39.5  | 5.19  | 128 | 6  |
| Q9NX58     | Cell growth   | 16.    | 6226913  | 6  | 9  | 6  | 43.6  | 9.54  | 212 | 6  |
| Q7LOY3     | Mitochondr    | 25.    | 8064516  | 7  | 7  | 7  | 47.3  | 9.36  | 60  | 7  |
| AOA0S2Z4Z6 | Serine/argi   | 9.     | 80392157 | 6  | 7  | 6  | 103.9 | 11.84 | 102 | 6  |
| F8W7E0     | Calpastatin   | 27.    | 735369   | 7  | 9  | 1  | 41.7  | 7.05  | 64  | 7  |
| Q13057     | Bifunction    | 20.    | 035461   | 7  | 7  | 7  | 62.3  | 6.99  | 112 | 7  |
| Q86U42     | Polyadenyl    | 33.    | 6601307  | 6  | 9  | 6  | 32.7  | 5.06  | 155 | 6  |
| O60568     | Procollagen   | 9.     | 21409214 | 6  | 11 | 6  | 84.7  | 6.05  | 179 | 6  |
| Q13526     | Peptidyl-p    | 31.    | 9018405  | 3  | 5  | 3  | 18.2  | 8.82  | 188 | 3  |
| Q92930     | Ras-relate    | c39.   | 1304348  | 9  | 15 | 3  | 23.6  | 9.07  | 231 | 9  |
| O94925     | Glutaminase   | 11.    | 8086697  | 5  | 6  | 4  | 73.4  | 7.77  | 126 | 5  |
| O43615     | Mitochondr    | 23.    | 4513274  | 10 | 11 | 10 | 51.3  | 8.32  | 168 | 10 |
| J3KQ32     | Obg-like      | A127.  | 6442308  | 9  | 10 | 9  | 46.9  | 8.06  | 109 | 9  |
| Q01844     | RNA-binding   | 13.    | 7195122  | 4  | 8  | 3  | 68.4  | 9.33  | 164 | 4  |
| P62316     | Small nucle   | 63.    | 559322   | 7  | 11 | 7  | 13.5  | 9.91  | 114 | 7  |
| AOA024R8E4 | Chromosome    | 22.    | 4215247  | 5  | 6  | 5  | 25.4  | 5.52  | 243 | 5  |
| Q86Y56     | Dynein ass    | 11.    | 9298246  | 7  | 7  | 7  | 93.5  | 6.42  | 101 | 7  |
| P30622     | CAP-Gly       | don9.  | 73574409 | 11 | 11 | 11 | 162.1 | 5.36  | 72  | 11 |
| Q15003     | Condensin     | c14.   | 1700405  | 8  | 8  | 8  | 82.5  | 5.06  | 170 | 8  |
| Q1HBJ4     | Mitogen-act   | 20.    | 8333333  | 4  | 7  | 3  | 41.4  | 6.98  | 149 | 4  |
| P10515     | Dihydrolip    | 15.    | 1468315  | 6  | 7  | 6  | 69    | 7.84  | 163 | 6  |
| Q05048     | Cleavage st   | 22.    | 9698376  | 8  | 8  | 8  | 48.3  | 6.58  | 102 | 8  |
| O95782     | AP-2 compl    | 13.    | 3060389  | 8  | 9  | 4  | 107.5 | 7.03  | 75  | 8  |
| P53992     | Protein tre   | 11.    | 1517367  | 8  | 9  | 8  | 118.2 | 7.06  | 134 | 8  |
| O95202     | LETM1 and     | F13.   | 1258457  | 5  | 7  | 5  | 83.3  | 6.7   | 97  | 5  |
| B4DM78     | cDNA FLJ58    | 118.   | 2300885  | 8  | 9  | 1  | 63    | 6.77  | 159 | 8  |
| V9HWI3     | Cathepsin     | I18.   | 6893204  | 6  | 9  | 6  | 44.5  | 6.54  | 103 | 6  |
| P40938     | Replicatio    | 26.    | 1235955  | 5  | 6  | 5  | 40.5  | 8.34  | 149 | 5  |
| Q93008     | Probable      | ut3.   | 92996109 | 9  | 9  | 9  | 292.1 | 5.8   | 205 | 9  |
| Q9BZK7     | F-box-like    | 10.    | 311284   | 4  | 5  | 4  | 55.6  | 5.55  | 141 | 4  |
| Q9NSE4     | Isoleucine    | -9.    | 38735178 | 7  | 9  | 7  | 113.7 | 7.2   | 176 | 7  |
| P53041     | Serine/thr    | 17.    | 0340681  | 6  | 7  | 6  | 56.8  | 6.28  | 164 | 6  |
| Q96199     | Succinate     | --17.  | 8240741  | 5  | 5  | 5  | 46.5  | 6.39  | 213 | 5  |
| Q9BR76     | Coronin-1B    | 24.    | 5398773  | 7  | 8  | 7  | 54.2  | 5.88  | 123 | 7  |

|            |             |             |    |    |    |       |       |     |    |
|------------|-------------|-------------|----|----|----|-------|-------|-----|----|
| P43034     | Platelet-ac | 26.8292683  | 9  | 9  | 8  | 46.6  | 7.37  | 88  | 9  |
| Q9BUP3     | Oxidoreduct | 42.5619835  | 10 | 11 | 10 | 27    | 8.38  | 154 | 10 |
| Q96CW1     | AP-2 compl  | 17.2413793  | 6  | 7  | 6  | 49.6  | 9.54  | 181 | 6  |
| Q969Q0     | 60S riboson | 45.2830189  | 8  | 12 | 8  | 12.5  | 10.65 | 152 | 8  |
| A8K5M4     | cDNA FLJ75  | 23.4732824  | 8  | 8  | 8  | 58    | 5.85  | 82  | 8  |
| AOA024ROM6 | Translocase | 18.8596491  | 7  | 9  | 7  | 50.4  | 9.42  | 162 | 7  |
| Q9NR31     | GTP-binding | 42.4242424  | 7  | 9  | 7  | 22.4  | 6.68  | 121 | 7  |
| B4DWA0     | cDNA FLJ541 | 12.5        | 3  | 14 | 2  | 34.3  | 10.37 | 99  | 3  |
| AOA0S2Z5H3 | Clathrin ir | 15.0855365  | 6  | 8  | 6  | 70.3  | 6.58  | 72  | 6  |
| B2R802     | cDNA, FLJ9  | 31.9148936  | 7  | 10 | 7  | 31.3  | 9.86  | 70  | 7  |
| Q15907     | Ras-relate  | 38.9908257  | 8  | 10 | 8  | 24.5  | 5.94  | 170 | 8  |
| Q9H7B2     | Ribosome p  | 26.1437908  | 7  | 8  | 7  | 35.6  | 9.99  | 90  | 7  |
| Q961R7     | 4-hydroxypl | 29.1105121  | 8  | 13 | 8  | 39.4  | 7.03  | 140 | 8  |
| A8K070     | COP9 signa  | 18.8212928  | 8  | 9  | 8  | 58.9  | 6.32  | 132 | 8  |
| Q14376     | UDP-glucos  | 16.3793103  | 4  | 4  | 4  | 38.3  | 6.73  | 201 | 4  |
| Q59EK3     | Adaptor-rel | 119.0987124 | 7  | 9  | 7  | 53.2  | 8.88  | 69  | 7  |
| P04181     | Ornithine   | 18.6788155  | 6  | 8  | 6  | 48.5  | 7.03  | 137 | 6  |
| Q59EH3     | Acid phosph | 38.1818182  | 6  | 11 | 6  | 18.7  | 7.88  | 237 | 6  |
| P61326     | Protein ma  | 34.9315068  | 5  | 7  | 5  | 17.2  | 6.11  | 111 | 5  |
| A8K6X9     | cDNA FLJ76  | 7.75788576  | 7  | 9  | 7  | 133.4 | 6.77  | 108 | 7  |
| Q9NU22     | Midasin OS  | = 2.5196569 | 10 | 10 | 10 | 632.4 | 5.68  | 88  | 10 |
| B7Z4C8     | 60S riboson | 45.3846154  | 9  | 14 | 9  | 15.1  | 10.37 | 179 | 9  |
| K7ELC2     | 40S riboson | 34.8684211  | 4  | 11 | 4  | 17.7  | 10.39 | 99  | 4  |
| P00492     | Hypoxanthir | 44.4954128  | 9  | 9  | 9  | 24.6  | 6.68  | 141 | 9  |
| Q4VC31     | Coiled-coil | 48.6111111  | 5  | 6  | 5  | 16.6  | 7.81  | 117 | 5  |
| 075489     | NADH dehy   | 34.0909091  | 6  | 7  | 6  | 30.2  | 7.5   | 123 | 6  |
| Q16718     | NADH dehy   | 44.8275862  | 4  | 6  | 4  | 13.5  | 5.99  | 157 | 4  |
| Q9Y333     | U6 snRNA-as | 41.0526316  | 3  | 4  | 3  | 10.8  | 6.52  | 140 | 3  |
| P16083     | Ribosyl dih | 29.4372294  | 4  | 6  | 4  | 25.9  | 6.29  | 160 | 4  |
| Q8WU90     | Zinc finger | 20.657277   | 7  | 7  | 7  | 48.6  | 5.31  | 171 | 7  |
| P08574     | Cytochrome  | 23.6923077  | 6  | 7  | 6  | 35.4  | 9     | 97  | 6  |
| MOR2B7     | DNA polymer | 8.29655781  | 8  | 9  | 7  | 126.3 | 7.21  | 151 | 8  |
| Q9GZZ9     | Ubiquitin-1 | 17.5742574  | 5  | 8  | 5  | 44.8  | 4.84  | 186 | 5  |
| P53582     | Methionine  | 26.1658031  | 6  | 6  | 6  | 43.2  | 7.17  | 114 | 6  |
| 075400     | Pre-mRNA-p  | 8.67293626  | 6  | 7  | 6  | 108.7 | 7.56  | 112 | 6  |
| 014776     | Transcripti | 9.28961749  | 9  | 10 | 9  | 123.8 | 8.65  | 122 | 9  |
| P63279     | SUMO-conju  | 39.8734177  | 4  | 7  | 4  | 18    | 8.66  | 196 | 4  |
| P08648     | Integrin al | 8.38894185  | 6  | 6  | 6  | 114.5 | 5.77  | 179 | 6  |
| Q13636     | Ras-relate  | 28.8659794  | 4  | 6  | 4  | 21.6  | 7.06  | 120 | 4  |
| P11233     | Ras-relate  | 27.6699029  | 4  | 6  | 3  | 23.6  | 7.11  | 155 | 4  |
| Q6Y7W6     | GRB10-inte  | 6.543495    | 5  | 8  | 5  | 150   | 5.54  | 108 | 5  |
| Q99622     | Protein C1  | 51.5873016  | 4  | 5  | 4  | 13.2  | 5.14  | 131 | 4  |
| Q5M7Z5     | GRHPR prote | 18.1818182  | 4  | 5  | 4  | 36.8  | 6.35  | 128 | 4  |
| Q55QH4     | DBP2 protei | 8.16522574  | 7  | 7  | 7  | 119.2 | 6.8   | 161 | 7  |
| Q16762     | Thiosulfate | 29.2929293  | 5  | 7  | 5  | 33.4  | 7.25  | 106 | 5  |
| 043324     | Eukaryotic  | 35.0574713  | 4  | 10 | 4  | 19.8  | 8.54  | 201 | 4  |
| Q13243     | Serine/argi | 21.3235294  | 6  | 7  | 5  | 31.2  | 11.59 | 151 | 6  |
| Q9UBI6     | Guanine nuc | 61.1111111  | 4  | 6  | 4  | 8     | 8.97  | 172 | 4  |
| P25685     | DnaJ homol  | 18.8235294  | 5  | 6  | 5  | 38    | 8.63  | 160 | 5  |
| Q6L8Q7     | 2', 5'-phos | 16.2561576  | 7  | 8  | 7  | 67.3  | 6.57  | 106 | 7  |
| Q9BRA2     | Thioredoxin | 44.7154472  | 5  | 10 | 5  | 13.9  | 5.52  | 200 | 5  |
| AOA0A6YYL2 | Sulfotransf | 27.5747508  | 4  | 4  | 4  | 34.8  | 5.83  | 88  | 4  |
| C1KGA3     | MHC class I | 15.8469945  | 3  | 8  | 1  | 40.7  | 7.44  | 82  | 3  |
| Q9NTJ5     | Phosphatid  | 12.0954003  | 6  | 7  | 6  | 66.9  | 7.12  | 82  | 6  |
| B2RAQ8     | cDNA, FLJ9  | 11.5135834  | 7  | 8  | 7  | 88.3  | 8.59  | 243 | 7  |
| Q14966     | Zinc finger | 6.67340748  | 9  | 9  | 9  | 220.5 | 6.38  | 81  | 9  |
| AOA0G2JK23 | Large proli | 9.54063604  | 7  | 7  | 7  | 119.3 | 5.6   | 142 | 7  |
| P40925     | Malate dehy | 18.2634731  | 4  | 6  | 4  | 36.4  | 7.36  | 114 | 4  |
| A4D105     | Replicatio  | 36.3636364  | 3  | 4  | 3  | 13.6  | 5.08  | 125 | 3  |
| Q66MV3     | Putative p  | 15.7142857  | 2  | 4  | 2  | 15.8  | 9.1   | 79  | 2  |
| Q13895     | Bystin OS   | =16.9336384 | 5  | 8  | 5  | 49.6  | 8.12  | 104 | 5  |
| AOA087WU03 | Heterogene  | 40.3508772  | 2  | 4  | 2  | 6.7   | 4.65  | 114 | 2  |
| Q7Z7K6     | Centromere  | 25.4545455  | 4  | 5  | 4  | 29.9  | 9.73  | 102 | 4  |
| 043237     | Cytoplasmic | 9.55284553  | 5  | 6  | 5  | 54.1  | 6.38  | 138 | 5  |
| AOA0A0MT49 | Transcripti | 4.81856038  | 7  | 8  | 7  | 188.7 | 8.12  | 153 | 7  |
| BOUZZ8     | Chromosome  | 15.7377049  | 5  | 6  | 5  | 68    | 9.67  | 121 | 5  |
| D6RDC3     | Transcripti | 54.1284404  | 4  | 9  | 1  | 11.8  | 5.9   | 277 | 4  |
| Q59GQ0     | Actin relat | 9.97506234  | 2  | 3  | 1  | 45    | 8.6   | 111 | 2  |
| L7RXH5     | Mitogen-act | 28.23219    | 7  | 11 | 6  | 43.1  | 6.74  | 217 | 7  |
| Q9Y5J1     | U3 small nt | 14.7482014  | 7  | 8  | 7  | 62    | 8.76  | 89  | 7  |
| 043678     | NADH dehy   | 56.5656566  | 5  | 6  | 5  | 10.9  | 9.57  | 160 | 5  |
| Q9Y6M5     | Zinc trans  | 20.5128205  | 7  | 10 | 7  | 55.3  | 6.48  | 58  | 7  |
| Q14232     | Translatio  | 32.4590164  | 8  | 10 | 8  | 33.7  | 7.33  | 109 | 8  |

|            |                                                 |    |    |   |       |       |     |    |
|------------|-------------------------------------------------|----|----|---|-------|-------|-----|----|
| Q6FI81     | Anamorsin (25.6410256                           | 5  | 8  | 5 | 33.6  | 5.62  | 72  | 5  |
| A8K556     | cDNA FLJ78223.2492997                           | 6  | 7  | 6 | 40.3  | 8.15  | 67  | 6  |
| Q14116     | Interleukin 49.2227979                          | 5  | 7  | 5 | 22.3  | 4.67  | 114 | 5  |
| Q9H6R4     | Nucleolar protein 07504363                      | 7  | 9  | 7 | 127.5 | 7.64  | 143 | 7  |
| 075832     | 26S proteasome 29.2035398                       | 4  | 7  | 4 | 24.4  | 6.1   | 37  | 4  |
| P13073     | Cytochrome c 33.7278107                         | 5  | 12 | 5 | 19.6  | 9.51  | 50  | 5  |
| AOA024R625 | Serine/threonine 19.218241                      | 6  | 7  | 4 | 35.1  | 5.06  | 69  | 6  |
| P61077     | Ubiquitin-c26.5306122                           | 4  | 6  | 4 | 16.7  | 7.8   | 114 | 4  |
| Q9NPJ3     | Acyl-coenzyme A 40.7142857                      | 5  | 6  | 5 | 15    | 9.14  | 142 | 5  |
| 043865     | Adenosylhomocysteinase 16.7924528               | 6  | 8  | 5 | 58.9  | 6.89  | 162 | 6  |
| Q14151     | Scaffold protein 17.1038825                     | 12 | 13 | 7 | 107.4 | 6.16  | 48  | 12 |
| Q96CT7     | Coiled-coil domain 40.3587444                   | 7  | 9  | 7 | 25.8  | 9.54  | 108 | 7  |
| A5Y5A3     | PC1/MRPS28 24.1007194                           | 5  | 5  | 4 | 31.2  | 6.19  | 161 | 5  |
| Q9NQT4     | Exosome component 29.3617021                    | 4  | 4  | 4 | 25.2  | 7.59  | 94  | 4  |
| Q9BQ39     | ATP-dependent 12.0759837                        | 6  | 9  | 4 | 82.5  | 9.17  | 150 | 6  |
| B2RDN4     | Ribosome biogenesis 10.9919571                  | 6  | 7  | 6 | 83.5  | 6.19  | 156 | 6  |
| J3KPP4     | Cisplatin resistance 15.9509202                 | 6  | 7  | 6 | 58.2  | 9.92  | 140 | 6  |
| 014828     | Secretory protein 21.6138329                    | 5  | 7  | 5 | 38.3  | 7.64  | 124 | 5  |
| Q01650     | Large neutral amino acid transporter 8.08678501 | 4  | 7  | 4 | 55    | 7.72  | 111 | 4  |
| Q95394     | Phosphoacetate kinase 11.2546125                | 5  | 7  | 5 | 59.8  | 6.25  | 139 | 5  |
| Q9H6F5     | Coiled-coil domain 25.5555556                   | 7  | 8  | 7 | 40.2  | 10.33 | 89  | 7  |
| P21266     | Glutathione S-transferase 32.4444444            | 6  | 7  | 6 | 26.5  | 5.54  | 138 | 6  |
| Q99471     | Prefoldin subunit 40.9090909                    | 6  | 9  | 6 | 17.3  | 6.33  | 131 | 6  |
| P35658     | Nuclear pore complex 5.02392344                 | 7  | 8  | 7 | 213.5 | 7.47  | 124 | 7  |
| P54727     | UV excision endonuclease 18.3374083             | 4  | 7  | 4 | 43.1  | 4.84  | 140 | 4  |
| AOA1P0AYU5 | Sideroflexin 25.5384615                         | 6  | 7  | 5 | 36    | 9.09  | 104 | 6  |
| 043795     | Unconventional 8.97887324                       | 6  | 6  | 6 | 131.9 | 9.38  | 115 | 6  |
| Q96RS6     | NudC domain 10.1200686                          | 4  | 5  | 4 | 66.7  | 5.11  | 114 | 4  |
| H7BY58     | Protein-L-lysine 27.972028                      | 5  | 5  | 5 | 30.3  | 6.73  | 171 | 5  |
| P01111     | GTPase NRas 38.6243386                          | 5  | 9  | 4 | 21.2  | 5.17  | 126 | 5  |
| P17301     | Integrin alpha 5.84250635                       | 4  | 5  | 4 | 129.2 | 5.31  | 160 | 4  |
| Q12769     | Nuclear pore complex 5.64066852                 | 6  | 7  | 6 | 162   | 5.5   | 117 | 6  |
| B2R4D5     | Actin-related protein 28.6516854                | 5  | 7  | 5 | 20.5  | 8.59  | 199 | 5  |
| Q9UNL2     | Translocation 16.2162162                        | 5  | 6  | 5 | 21.1  | 9.61  | 149 | 5  |
| Q9BVJ6     | U3 small nuclear RNA 9.98702983                 | 5  | 5  | 5 | 87.9  | 7.87  | 65  | 5  |
| AOA024QYY3 | Phosphoribosyl transferase 24.6612466           | 6  | 8  | 5 | 40.9  | 7.44  | 144 | 6  |
| Q5JPE7     | Nodal modulator 8.12943962                      | 7  | 7  | 7 | 139.4 | 5.76  | 105 | 7  |
| P11279     | Lysosome-associated 11.2709832                  | 3  | 5  | 3 | 44.9  | 8.75  | 138 | 3  |
| Q9Y263     | Phospholipase 14.2138365                        | 7  | 9  | 7 | 87.1  | 6.37  | 126 | 7  |
| P08754     | Guanine nucleotide 30.7909605                   | 7  | 9  | 5 | 40.5  | 5.69  | 123 | 7  |
| 000193     | Small acid phosphatase 29.5081967               | 4  | 5  | 4 | 20.3  | 4.72  | 127 | 4  |
| Q86SX6     | Glutaredoxin 26.7515924                         | 3  | 6  | 3 | 16.6  | 6.79  | 128 | 3  |
| Q15819     | Ubiquitin-c48.9655172                           | 7  | 7  | 5 | 16.4  | 8.09  | 157 | 7  |
| P13807     | Glycogen phosphorylase 8.27679783               | 3  | 4  | 3 | 83.7  | 6.18  | 79  | 3  |
| Q562Z4     | Actin-like 80.5825243                           | 4  | 28 | 1 | 11.5  | 7.58  | 197 | 4  |
| AOA0J9YXF2 | Paraoxonase 14.1333333                          | 3  | 5  | 3 | 41.5  | 5.72  | 74  | 3  |
| Q6FGG2     | VAMP3 protein 61                                | 4  | 5  | 4 | 11.3  | 8.79  | 139 | 4  |
| B2R761     | cDNA, FLJ9111.5173675                           | 7  | 9  | 7 | 59    | 7.05  | 115 | 7  |
| Q6P1J9     | Parafibromin 20.1506591                         | 9  | 10 | 9 | 60.5  | 9.61  | 137 | 9  |
| B2RDJ6     | Probable cytochrome 25.9587021                  | 6  | 6  | 6 | 37.8  | 4.97  | 109 | 6  |
| Q9NQC3     | Reticulon-5.11744966                            | 3  | 5  | 3 | 129.9 | 4.5   | 78  | 3  |
| Q9BV57     | 1,2-dihydroxyacetone 40.2234637                 | 6  | 7  | 6 | 21.5  | 5.68  | 79  | 6  |
| P07919     | Cytochrome c 29.6703297                         | 3  | 4  | 3 | 10.7  | 4.44  | 164 | 3  |
| P54920     | Alpha-soluble 29.8305085                        | 6  | 7  | 6 | 33.2  | 5.36  | 154 | 6  |
| Q5HYG7     | Putative uridine 17.6211454                     | 6  | 8  | 6 | 50.3  | 7.8   | 91  | 6  |
| Q14CX7     | N-alpha-acetyl 9.46502058                       | 5  | 5  | 4 | 112.2 | 6.64  | 127 | 5  |
| Q7Z739     | YTH domain-8.71794872                           | 6  | 7  | 6 | 63.8  | 9.04  | 123 | 6  |
| Q9NP79     | Vacuolar protein 16.6123779                     | 3  | 5  | 3 | 33.9  | 6.29  | 136 | 3  |
| Q8WUM0     | Nuclear pore complex 6.66089965                 | 4  | 4  | 4 | 128.9 | 5.1   | 127 | 4  |
| Q9NRF9     | DNA polymerase 55.1020408                       | 5  | 6  | 5 | 16.8  | 4.74  | 79  | 5  |
| P45973     | Chromobox protein 25.1308901                    | 6  | 8  | 5 | 22.2  | 5.86  | 118 | 6  |
| Q9GZL7     | Ribosome biogenesis 22.2222222                  | 6  | 7  | 6 | 47.7  | 5.9   | 47  | 6  |
| P62834     | Ras-related 36.9565217                          | 6  | 7  | 1 | 21    | 6.67  | 167 | 6  |
| P61224     | Ras-related 45.1086957                          | 7  | 8  | 2 | 20.8  | 5.78  | 145 | 7  |
| Q5BKZ1     | DBIRD complex 14.4329897                        | 7  | 7  | 7 | 65.6  | 5.15  | 176 | 7  |
| P07305     | Histone H1.19.5876289                           | 6  | 9  | 6 | 20.9  | 10.84 | 187 | 6  |
| Q8IX12     | Cell division 7.82608696                        | 9  | 10 | 9 | 132.7 | 5.76  | 75  | 9  |
| A8K878     | Mesencephalic 32.4324324                        | 5  | 7  | 5 | 21.1  | 8.92  | 57  | 5  |
| Q2NL82     | Pre-rRNA-p10.5721393                            | 6  | 6  | 6 | 91.8  | 7.42  | 92  | 6  |
| AOA140VKF1 | Kinesin-like 12.6896552                         | 7  | 8  | 6 | 81.3  | 7.83  | 109 | 7  |
| Q92769     | Histone deacetylase 20.4918033                  | 7  | 10 | 4 | 55.3  | 5.91  | 59  | 7  |
| A8K5B6     | cDNA FLJ7618.42418236                           | 6  | 7  | 6 | 113.9 | 8.56  | 131 | 6  |
| P62745     | Rho-related 42.8571429                          | 7  | 10 | 6 | 22.1  | 5.24  | 86  | 7  |

|            |                        |   |    |   |       |       |     |   |
|------------|------------------------|---|----|---|-------|-------|-----|---|
| Q99567     | Nuclear por12.6855601  | 6 | 6  | 6 | 83.5  | 5.69  | 114 | 6 |
| Q06210     | Glutamine--16.1659514  | 8 | 8  | 8 | 78.8  | 7.11  | 119 | 8 |
| P56270     | Myc-associat11.1111111 | 3 | 6  | 3 | 48.6  | 8.95  | 85  | 3 |
| G5EA30     | CUG triple17.7042802   | 6 | 7  | 6 | 55.1  | 8.38  | 138 | 6 |
| P05204     | Non-histone45.5555556  | 2 | 16 | 2 | 9.4   | 9.99  | 105 | 2 |
| Q96DG6     | Carboxymet129.7959184  | 6 | 11 | 6 | 28    | 7.18  | 142 | 6 |
| A8KAE0     | cDNA FLJ787.97165633   | 7 | 7  | 7 | 125.9 | 5.62  | 118 | 7 |
| P49458     | Signal rec34.8837209   | 2 | 4  | 2 | 10.1  | 7.97  | 119 | 2 |
| P19525     | Interferon-12.1597096  | 6 | 8  | 6 | 62.1  | 8.4   | 65  | 6 |
| O60502     | Protein O-(9.17030568  | 6 | 7  | 6 | 102.8 | 4.91  | 83  | 6 |
| Q9UL25     | Ras-relatec17.3333333  | 3 | 4  | 3 | 24.3  | 7.94  | 174 | 3 |
| Q9ULW0     | Targeting p14.7255689  | 8 | 9  | 8 | 85.6  | 9.23  | 73  | 8 |
| HOYGM0     | Caseinolyti8.42696629  | 4 | 5  | 4 | 80.1  | 8.85  | 136 | 4 |
| Q9H9B4     | Sideroflexi21.7391304  | 7 | 7  | 6 | 35.6  | 9.07  | 130 | 7 |
| O00767     | Acyl-CoA de17.5487465  | 5 | 6  | 5 | 41.5  | 9     | 104 | 5 |
| A8K6D2     | cDNA FLJ7629.0983607   | 5 | 8  | 5 | 26.7  | 9.17  | 124 | 5 |
| Q81WZ3     | Ankyrin re2.83241542   | 5 | 6  | 3 | 269.3 | 5.73  | 119 | 5 |
| C9JRZ6     | MICOS comp131.8965517  | 7 | 8  | 7 | 26.7  | 8.47  | 116 | 7 |
| O60343     | TBC1 domair5.62403698  | 5 | 5  | 5 | 146.5 | 7.01  | 127 | 5 |
| Q13451     | Peptidyl-p19.4748359   | 7 | 7  | 7 | 51.2  | 5.9   | 59  | 7 |
| P36957     | Dihydrolipe11.0375276  | 5 | 7  | 5 | 48.7  | 8.95  | 119 | 5 |
| A0A0S2Z3H8 | GNAS comple26.9035533  | 8 | 9  | 7 | 45.6  | 5.82  | 135 | 8 |
| F8VXU5     | Vacuolar p123.8317757  | 5 | 6  | 5 | 24    | 8.18  | 185 | 5 |
| Q8NFB4     | Nucleoporir16.5644172  | 4 | 6  | 4 | 36.7  | 5.92  | 141 | 4 |
| O00479     | High mobili37.7777778  | 3 | 6  | 3 | 9.5   | 10.48 | 80  | 3 |
| Q71RC2     | La-related 11.4640884  | 6 | 8  | 5 | 80.5  | 6.61  | 141 | 6 |
| Q96KB5     | Lymphokine-22.0496894  | 7 | 8  | 7 | 36.1  | 5.12  | 87  | 7 |
| P78406     | mRNA export22.0108696  | 6 | 7  | 6 | 40.9  | 7.83  | 111 | 6 |
| Q8WVJ2     | NudC domair47.7707006  | 4 | 4  | 4 | 17.7  | 5.07  | 117 | 4 |
| A8K761     | NADH dehyd30.2325581   | 5 | 6  | 5 | 20.8  | 8.48  | 84  | 5 |
| Q92552     | 28S riboson14.0096618  | 4 | 4  | 4 | 47.6  | 6.18  | 128 | 4 |
| B4DXL9     | cDNA FLJ5325.0659631   | 8 | 8  | 1 | 42.7  | 5.16  | 146 | 8 |
| B4E0X1     | Beta-2-micr36.8852459  | 3 | 6  | 3 | 13.9  | 7.44  | 95  | 3 |
| Q15397     | Pumilio hon14.3518519  | 8 | 8  | 8 | 73.5  | 9.64  | 80  | 8 |
| P30837     | Aldehyde de13.1528046  | 5 | 5  | 5 | 57.2  | 6.8   | 119 | 5 |
| E9PGZ1     | Caldesmon (20.1492537  | 8 | 10 | 8 | 61.7  | 6.11  | 108 | 8 |
| P06703     | Protein S1(25.5555556  | 4 | 6  | 4 | 10.2  | 5.48  | 130 | 4 |
| B2RBY4     | DNA primase13.5714286  | 5 | 6  | 5 | 49.9  | 8.38  | 128 | 5 |
| Q9BQ69     | O-acetyl-A127.0769231  | 5 | 6  | 5 | 35.5  | 9.51  | 99  | 5 |
| Q9HAV7     | GrpE protei 32.718894  | 5 | 7  | 5 | 24.3  | 8.12  | 61  | 5 |
| Q6NUQ4     | Transmembr2.01045138   | 6 | 6  | 6 | 77.1  | 9.14  | 125 | 6 |
| B3KNS8     | cDNA FLJ3016.8975069   | 4 | 5  | 4 | 41.5  | 10.59 | 89  | 4 |
| O95881     | Thioredoxir 26.744186  | 5 | 7  | 5 | 19.2  | 5.4   | 123 | 5 |
| O96008     | Mitochondri25.7617729  | 5 | 6  | 5 | 37.9  | 7.25  | 73  | 5 |
| Q9NZ45     | CDGSH iron-50.9259259  | 4 | 5  | 4 | 12.2  | 9.09  | 129 | 4 |
| D3DU92     | RNA binding14.0983607  | 4 | 4  | 4 | 34.2  | 11.84 | 138 | 4 |
| Q14320     | Protein FA19.4690265   | 5 | 8  | 5 | 40.2  | 6.83  | 97  | 5 |
| Q06203     | Amidophospl17.2147002  | 6 | 6  | 6 | 57.4  | 6.76  | 124 | 6 |
| A0A0A0MR7  | U1 small nt27.7777778  | 3 | 5  | 3 | 19.7  | 9.58  | 88  | 3 |
| Q9BXW7     | Cat eye syr18.4397163  | 5 | 8  | 5 | 46.3  | 8.13  | 114 | 5 |
| Q9Y2V2     | Calcium-reg27.2108844  | 2 | 7  | 2 | 15.9  | 8.21  | 80  | 2 |
| A8K3Z5     | Nucleoporir19.6319018  | 4 | 4  | 4 | 34.8  | 9.36  | 173 | 4 |
| Q08ET0     | Cell prolif 21.09375   | 4 | 8  | 4 | 28.9  | 9.36  | 52  | 4 |
| P27105     | Erythrocyte23.9583333  | 6 | 8  | 6 | 31.7  | 7.88  | 89  | 6 |
| Q9UHI6     | Probable A112.9854369  | 7 | 9  | 7 | 92.2  | 6.95  | 101 | 7 |
| Q9UBC2     | Epidermal p1.06018519  | 4 | 4  | 4 | 94.2  | 5.11  | 192 | 4 |
| P12081     | Histidine--14.5383104  | 7 | 7  | 5 | 57.4  | 5.88  | 118 | 7 |
| D6RFN0     | COP9 signal18.7214612  | 5 | 6  | 5 | 49.7  | 5.81  | 105 | 5 |
| P51970     | NADH dehyd 36.627907   | 5 | 6  | 5 | 20.1  | 7.65  | 81  | 5 |
| Q13596     | Sorting ne14.3678161   | 6 | 6  | 6 | 59    | 5.15  | 164 | 6 |
| P61026     | Ras-relatec 30         | 7 | 12 | 3 | 22.5  | 8.38  | 203 | 7 |
| A0A024R0R4 | SUMO-1 acti19.0751445  | 7 | 8  | 7 | 38.4  | 5.3   | 127 | 7 |
| Q6IT96     | Histone de21.5767635   | 7 | 10 | 4 | 55.1  | 5.48  | 108 | 7 |
| Q99584     | Protein S1(78.5714286  | 6 | 7  | 6 | 11.5  | 6.16  | 97  | 6 |
| HOYEH1     | Phosphatidy24.3506494  | 4 | 5  | 1 | 32.2  | 8.31  | 98  | 4 |
| Q8WX93     | Palladin 06.43528561   | 7 | 8  | 6 | 150.5 | 7.09  | 134 | 7 |
| Q6FII1     | Glutathione 32.300885  | 7 | 7  | 7 | 25.5  | 8.41  | 156 | 7 |
| O43488     | Aflatoxin F23.1197772  | 5 | 6  | 5 | 39.6  | 7.17  | 97  | 5 |
| Q6FIC5     | Chloride ir27.2727273  | 5 | 6  | 5 | 28.8  | 5.59  | 83  | 5 |
| P42771     | Cyclin-depe44.8717949  | 4 | 5  | 2 | 16.5  | 5.81  | 108 | 4 |
| E7EQZ4     | Survival mc11.5646259  | 3 | 7  | 3 | 31.7  | 5.71  | 90  | 3 |
| Q5VT79     | Annexin A8- 29.969419  | 6 | 6  | 6 | 36.9  | 5.78  | 94  | 6 |
| A0A024R3J1 | Tripartite 12.244898   | 6 | 7  | 6 | 65.8  | 7.15  | 158 | 6 |

|            |              |              |   |    |   |       |       |     |   |
|------------|--------------|--------------|---|----|---|-------|-------|-----|---|
| Q96CS3     | FAS-associ   | 15.2808989   | 4 | 4  | 4 | 52.6  | 5.62  | 120 | 4 |
| O95456     | Proteasome   | 18.75        | 4 | 6  | 4 | 32.8  | 7.17  | 97  | 4 |
| Q8NFH3     | Nucleoporin  | 8.15789474   | 2 | 3  | 2 | 42.1  | 5.63  | 147 | 2 |
| P00491     | Purine nucl  | 19.0311419   | 4 | 5  | 4 | 32.1  | 6.95  | 100 | 4 |
| AOA140VJF4 | Biliverdin   | 18.2432432   | 4 | 5  | 4 | 33.4  | 6.44  | 83  | 4 |
| Q5SW79     | Centrosomal  | 14.48232323  | 5 | 6  | 5 | 175.2 | 7.11  | 163 | 5 |
| E5KS60     | Succinate--  | 15.3347732   | 7 | 7  | 7 | 50.3  | 7.42  | 164 | 7 |
| Q9Y3C6     | Peptidyl-pi  | 28.313253    | 4 | 6  | 4 | 18.2  | 7.99  | 144 | 4 |
| F8VVA7     | Coatome      | st19.1919192 | 2 | 3  | 2 | 22.3  | 4.89  | 100 | 2 |
| B7ZKQ8     | PODXL protei | 14.8214286   | 6 | 9  | 6 | 58.8  | 5.49  | 59  | 6 |
| O94973     | AP-2 comple  | 8.30670927   | 5 | 6  | 1 | 103.9 | 6.96  | 70  | 5 |
| Q13868     | Exosome con  | 22.8668942   | 5 | 6  | 5 | 32.8  | 7.5   | 110 | 5 |
| Q5VV89     | Microsomal   | 22.2891566   | 2 | 3  | 2 | 18.4  | 9.96  | 72  | 2 |
| P18615     | Negative el  | 23.4210526   | 6 | 7  | 6 | 43.2  | 9.33  | 154 | 6 |
| E5KND5     | Elongation   | 16.1118509   | 6 | 6  | 6 | 83.4  | 7.01  | 95  | 6 |
| Q5LJA9     | Ubiquitin c  | 21.1956522   | 6 | 8  | 6 | 41.7  | 5.53  | 77  | 6 |
| E5KS95     | Elongation   | 24.6153846   | 6 | 7  | 6 | 35.4  | 8.38  | 95  | 6 |
| B1AKR6     | Dynein lig   | 35.8108108   | 4 | 5  | 4 | 16.2  | 7.02  | 73  | 4 |
| P04899     | Guanine nuc  | 18.3098592   | 6 | 8  | 4 | 40.4  | 5.54  | 119 | 6 |
| Q9NNW7     | Thioredoxin  | 10.6870229   | 4 | 6  | 3 | 56.5  | 7.5   | 82  | 4 |
| Q6PJT7     | Zinc finger  | 9.51086957   | 5 | 7  | 5 | 82.8  | 7.31  | 86  | 5 |
| Q86XP3     | ATP-depend   | 7.14285714   | 5 | 7  | 5 | 102.9 | 7.02  | 95  | 5 |
| Q9UJX3     | Anaphase-pi  | 9.01502504   | 4 | 5  | 4 | 66.8  | 5.64  | 140 | 4 |
| Q9UBQ5     | Eukaryotic   | 19.7247706   | 4 | 9  | 4 | 25    | 4.93  | 63  | 4 |
| P61513     | 60S riboso   | 41.3043478   | 3 | 8  | 3 | 10.3  | 10.43 | 158 | 3 |
| Q96T37     | Putative R   | 9.00716479   | 6 | 7  | 6 | 107.1 | 10.08 | 83  | 6 |
| V9HW44     | Epididymis   | 30.1310044   | 4 | 6  | 4 | 25.6  | 5.92  | 95  | 4 |
| P57740     | Nuclear por  | 11.027027    | 6 | 6  | 6 | 106.3 | 5.43  | 117 | 6 |
| A1L3A7     | Nuclear fr   | 13.6690647   | 7 | 8  | 7 | 76.1  | 8.7   | 143 | 7 |
| Q9H2U2     | Inorganic p  | 18.8622754   | 3 | 3  | 3 | 37.9  | 7.39  | 104 | 3 |
| Q9NY93     | Probable A   | 10.786106    | 4 | 4  | 4 | 61.6  | 9.26  | 109 | 4 |
| AOA024ROV4 | Vasodilator  | 23.6842105   | 7 | 8  | 7 | 39.8  | 8.94  | 110 | 7 |
| Q05DF2     | SF3A2 prote  | 16.6320166   | 6 | 7  | 6 | 51.4  | 10.11 | 49  | 6 |
| Q9H444     | Charged mu   | 26.7857143   | 6 | 7  | 6 | 24.9  | 4.82  | 208 | 6 |
| P35269     | General tra  | 11.4119923   | 5 | 5  | 5 | 58.2  | 7.49  | 105 | 5 |
| Q9H0S4     | Probable A   | 118.2417582  | 6 | 6  | 6 | 50.6  | 9.1   | 131 | 6 |
| Q15758     | Neutral ami  | 9.05730129   | 3 | 4  | 3 | 56.6  | 5.48  | 93  | 3 |
| O75179     | Ankyrin re   | 1.72877449   | 3 | 4  | 1 | 274.1 | 6.52  | 147 | 3 |
| Q15061     | WD repeat-   | 12.7031019   | 5 | 9  | 5 | 74.8  | 5.57  | 75  | 5 |
| P21281     | V-type prot  | 12.7201566   | 4 | 4  | 4 | 56.5  | 5.81  | 116 | 4 |
| P54709     | Sodium/pot   | 16.1290323   | 4 | 8  | 4 | 31.5  | 8.35  | 133 | 4 |
| P53611     | Geranylger   | 13.5951662   | 4 | 5  | 4 | 36.9  | 5.03  | 111 | 4 |
| Q99536     | Synaptic ve  | 22.6463104   | 4 | 6  | 4 | 41.9  | 6.29  | 78  | 4 |
| Q86UA3     | Chromosome   | 18.6170213   | 5 | 6  | 5 | 42.5  | 6.84  | 67  | 5 |
| P10909     | Clusterin    | (12.4721604  | 4 | 4  | 4 | 52.5  | 6.27  | 137 | 4 |
| Q9NTM9     | Copper hom   | 17.9487179   | 3 | 5  | 3 | 29.3  | 8.18  | 124 | 3 |
| Q9HDC9     | Adipocyte    | p18.5096154  | 6 | 8  | 6 | 46.5  | 6.16  | 86  | 6 |
| Q6IBN6     | CBX1 protei  | 44.8648649   | 4 | 4  | 3 | 21.4  | 4.93  | 140 | 4 |
| P28799     | Granulins    | (15.5143339  | 5 | 7  | 5 | 63.5  | 6.83  | 50  | 5 |
| O14545     | TRAF-type    | z9.27835052  | 4 | 5  | 4 | 64.8  | 5.29  | 125 | 4 |
| Q16795     | NADH dehyd   | 13.2625995   | 4 | 5  | 4 | 42.5  | 9.8   | 74  | 4 |
| B3KMR5     | cDNA FLJ12   | z6.39938319  | 7 | 9  | 7 | 143.6 | 8.75  | 137 | 7 |
| P07686     | Beta-hexos   | 16.0071942   | 5 | 5  | 5 | 63.1  | 6.76  | 48  | 5 |
| AOA024R333 | Transmembr   | 21.7252396   | 5 | 5  | 5 | 35.1  | 7.69  | 86  | 5 |
| P30419     | Glycylpepti  | 12.2983871   | 6 | 6  | 6 | 56.8  | 7.8   | 199 | 6 |
| O75934     | Pre-mRNA-s   | 25.3333333   | 4 | 4  | 4 | 26.1  | 5.66  | 109 | 4 |
| P49207     | 60S riboso   | 40.1709402   | 7 | 12 | 7 | 13.3  | 11.47 | 176 | 7 |
| P53597     | Succinate--  | 26.300578    | 5 | 8  | 5 | 36.2  | 8.79  | 103 | 5 |
| F6S8M0     | N-acetylgl   | 15.0684932   | 6 | 6  | 6 | 65.7  | 7.97  | 142 | 6 |
| P05114     | Non-histone  | 27           | 2 | 5  | 2 | 10.7  | 9.6   | 100 | 2 |
| AOA024QZY5 | PRP4 pre-mf  | 6.25620655   | 6 | 6  | 6 | 116.9 | 10.26 | 59  | 6 |
| O15294     | UDP-N-acety  | 6.59655832   | 6 | 6  | 6 | 116.9 | 6.7   | 100 | 6 |
| O00541     | Pescadillo   | 11.2244898   | 5 | 6  | 5 | 68    | 7.33  | 148 | 5 |
| Q96CP2     | FLYWCH fami  | 51.4285714   | 6 | 8  | 6 | 14.6  | 8.46  | 86  | 6 |
| O95758     | Polypyrimic  | 8.69565217   | 5 | 7  | 2 | 59.7  | 9.04  | 171 | 5 |
| Q9NYL4     | Peptidyl-pi  | 17.9104478   | 2 | 4  | 2 | 22.2  | 9.39  | 116 | 2 |
| Q969S3     | Zinc finger  | 13.836478    | 5 | 5  | 5 | 54.2  | 6.15  | 139 | 5 |
| Q69YJ7     | Putative ur  | 8.70020964   | 6 | 7  | 6 | 100.1 | 8.91  | 31  | 6 |
| P42677     | 40S riboso   | 42.8571429   | 4 | 11 | 1 | 9.5   | 9.45  | 186 | 4 |
| Q9Y512     | Sorting anc  | 10.6609808   | 4 | 5  | 4 | 51.9  | 6.9   | 74  | 4 |
| P10586     | Receptor-ty  | 5.92553749   | 8 | 8  | 8 | 212.7 | 6.3   | 73  | 8 |
| G3V5T9     | Cyclin-depe  | 27.7456647   | 6 | 7  | 4 | 39.2  | 8.62  | 138 | 6 |
| O75380     | NADH dehyd   | 29.8387097   | 3 | 5  | 3 | 13.7  | 8.28  | 145 | 3 |

|            |                        |   |    |   |       |       |     |   |
|------------|------------------------|---|----|---|-------|-------|-----|---|
| J3KR97     | Tubulin-spec6.91056911 | 6 | 6  | 6 | 136.5 | 6.34  | 111 | 6 |
| Q61CQ8     | ARHG protei36.6492147  | 4 | 4  | 3 | 21.3  | 8.12  | 104 | 4 |
| Q96PZ0     | Pseudouridy11.6490166  | 5 | 5  | 5 | 75    | 6.37  | 101 | 5 |
| Q52LJ0     | Protein FA23.9393939   | 6 | 6  | 5 | 37.2  | 6.29  | 72  | 6 |
| E5KLJ5     | Dynamin-lil6.89655172  | 6 | 6  | 6 | 117.7 | 7.77  | 106 | 6 |
| Q13330     | Metastasis-9.93006993  | 5 | 5  | 4 | 80.7  | 9.26  | 138 | 5 |
| Q7L2E3     | Putative A1 6.7001675  | 7 | 8  | 7 | 133.9 | 8.78  | 68  | 7 |
| Q9UI30     | Multifuncti 22.4       | 2 | 4  | 2 | 14.2  | 5.26  | 200 | 2 |
| Q9Y3Y2     | Chromatin t20.9677419  | 4 | 6  | 4 | 26.4  | 12.23 | 132 | 4 |
| Q9GZT3     | SRA stem-lc35.7798165  | 3 | 6  | 3 | 12.3  | 10.24 | 124 | 3 |
| AOA0D9SGE8 | PHD finger 22.9508197  | 6 | 6  | 6 | 41.3  | 8.68  | 85  | 6 |
| O15121     | Sphingolipi10.5263158  | 2 | 3  | 2 | 37.8  | 7.46  | 72  | 2 |
| Q15833     | Syntaxin-bil3.4907251  | 5 | 5  | 5 | 66.4  | 6.55  | 89  | 5 |
| Q549C5     | HCG2010808,33.8028169  | 3 | 4  | 3 | 15.5  | 4.34  | 146 | 3 |
| B4EOY9     | Serine/thrc18.7214612  | 6 | 6  | 3 | 49.2  | 5.68  | 108 | 6 |
| P19387     | DNA-directe 24         | 4 | 4  | 4 | 31.4  | 4.92  | 147 | 4 |
| Q5TFE4     | 5'-nucleoti20.6593407  | 5 | 7  | 5 | 51.8  | 6.35  | 40  | 5 |
| P17480     | Nucleolar t10.8638743  | 6 | 6  | 6 | 89.4  | 5.81  | 40  | 6 |
| AOA087WZE9 | High mobili11.5384615  | 1 | 8  | 1 | 13.9  | 9.91  | 72  | 1 |
| P61011     | Signal reccl4.8809524  | 6 | 7  | 6 | 55.7  | 8.75  | 60  | 6 |
| Q9Y6H1     | Coiled-coil33.7748344  | 3 | 5  | 3 | 15.5  | 9.22  | 88  | 3 |
| AOA0S2Z3G3 | Solute carl18.5810811  | 3 | 4  | 3 | 32.1  | 9.35  | 113 | 3 |
| Q01780     | Exosome con9.60451977  | 7 | 7  | 7 | 100.8 | 8.46  | 108 | 7 |
| Q13595     | Transformer18.7943262  | 5 | 7  | 4 | 32.7  | 11.27 | 132 | 5 |
| Q14558     | Phosphoric21.0674157   | 6 | 8  | 5 | 39.4  | 7.2   | 127 | 6 |
| Q6DN03     | Putative hi13.9896373  | 4 | 16 | 1 | 21.5  | 10.7  | 127 | 4 |
| B2R9X3     | cDNA, FLJ9418.5483871  | 5 | 5  | 5 | 41.8  | 7.12  | 98  | 5 |
| Q9Y316     | Protein ME19.5286195   | 4 | 5  | 4 | 33.7  | 7.14  | 131 | 4 |
| P48163     | NADP-depend12.9370629  | 7 | 7  | 7 | 64.1  | 6.13  | 114 | 7 |
| P62877     | E3 ubiquiti30.5555556  | 4 | 4  | 4 | 12.3  | 6.96  | 122 | 4 |
| Q59GR1     | Niemann-Pic5.58572537  | 6 | 6  | 6 | 143.1 | 5.45  | 96  | 6 |
| Q8NI27     | THO comple5.64971751   | 7 | 7  | 7 | 182.7 | 8.44  | 125 | 7 |
| Q9NYJ1     | Cytochrome 80.4597701  | 4 | 5  | 4 | 10.1  | 6.04  | 69  | 4 |
| Q16222     | UDP-N-acety15.9003831  | 7 | 8  | 7 | 58.7  | 6.33  | 142 | 7 |
| B8ZZN6     | Small ubiq24.6575342   | 4 | 6  | 4 | 16.6  | 6.2   | 54  | 4 |
| Q9H0D6     | 5'-3' exori7.05263158  | 5 | 6  | 5 | 108.5 | 7.47  | 34  | 5 |
| Q9NYK5     | 39S riboson 23.964497  | 6 | 6  | 6 | 38.7  | 7.65  | 73  | 6 |
| Q8N766     | ER membrane 8.4592145  | 5 | 7  | 5 | 111.7 | 7.66  | 104 | 5 |
| Q9NTI5     | Sister chr5.39046303   | 5 | 5  | 5 | 164.6 | 8.47  | 84  | 5 |
| Q01085     | Nucleolysir18.1333333  | 4 | 5  | 4 | 41.6  | 7.74  | 94  | 4 |
| AOA087WT44 | Heme oxygen21.3513514  | 4 | 4  | 4 | 41.6  | 5.44  | 65  | 4 |
| B2RAW0     | cDNA, FLJ946.88311688  | 4 | 6  | 4 | 82.4  | 5.53  | 81  | 4 |
| B4DS79     | cDNA FLJ56417.6352705  | 5 | 7  | 4 | 53.8  | 4.69  | 128 | 5 |
| Q99426     | Tubulin-fo128.2786885  | 5 | 6  | 5 | 27.3  | 5.15  | 130 | 5 |
| Q14019     | Coactosin-140.1408451  | 7 | 7  | 7 | 15.9  | 5.67  | 68  | 7 |
| Q9BV20     | Methylthio23.5772358   | 5 | 5  | 5 | 39.1  | 6.3   | 36  | 5 |
| Q9H773     | dCTP pyrop156.4705882  | 5 | 6  | 5 | 18.7  | 5.03  | 92  | 5 |
| Q7KZ85     | Transcripti5.61993048  | 7 | 7  | 7 | 198.9 | 4.91  | 61  | 7 |
| Q14344     | Guanine nuc15.3846154  | 4 | 5  | 2 | 44    | 8     | 147 | 4 |
| O60341     | Lysine-spec6.33802817  | 4 | 4  | 4 | 92.8  | 6.52  | 72  | 4 |
| Q7L5N1     | COP9 signal16.2079511  | 4 | 5  | 4 | 36.1  | 5.73  | 118 | 4 |
| Q9BT09     | Protein car 28.057554  | 6 | 6  | 6 | 30.7  | 5.49  | 40  | 6 |
| Q14573     | Inositol 1,2.77049794  | 5 | 5  | 4 | 303.9 | 6.48  | 103 | 5 |
| Q8WUV3     | PRMT3 prote13.1386861  | 6 | 6  | 6 | 61.9  | 7.42  | 85  | 6 |
| A6NDG6     | Glycerol-3-18.6915888  | 5 | 5  | 5 | 34    | 6.14  | 110 | 5 |
| Q9H3N1     | Thioredoxir16.7857143  | 4 | 5  | 4 | 31.8  | 4.98  | 111 | 4 |
| Q16513     | Serine/thrc6.80894309  | 6 | 6  | 5 | 112   | 6.3   | 113 | 6 |
| P09669     | Cytochrome 40          | 3 | 7  | 3 | 8.8   | 10.39 | 75  | 3 |
| Q9UKD2     | mRNA turnov35.1464435  | 5 | 7  | 5 | 27.5  | 8.29  | 71  | 5 |
| Q8N183     | Mimitin, mi38.4615385  | 4 | 5  | 4 | 19.8  | 8.97  | 47  | 4 |
| Q562L3     | Actin-like 45.631068   | 3 | 8  | 1 | 11.5  | 6.35  | 133 | 3 |
| B4DR61     | Protein trc9.33609959  | 4 | 6  | 4 | 52.9  | 8.24  | 103 | 4 |
| Q96J01     | THO comple7.97720798   | 2 | 4  | 2 | 38.7  | 6.09  | 56  | 2 |
| Q03701     | CCAAT/enhar5.59772296  | 5 | 6  | 5 | 120.9 | 5.94  | 65  | 5 |
| Q5T3I0     | G patch don12.3318386  | 3 | 4  | 3 | 50.4  | 9.63  | 112 | 3 |
| Q13242     | Serine/argi33.4841629  | 7 | 13 | 6 | 25.5  | 8.65  | 162 | 7 |
| P10606     | Cytochrome 24.0310078  | 4 | 11 | 4 | 13.7  | 8.81  | 131 | 4 |
| B4DJV9     | cDNA FLJ60431.1787072  | 5 | 5  | 5 | 28.3  | 7.64  | 96  | 5 |
| Q7Z4V5     | Hepatoma-de10.5812221  | 7 | 8  | 5 | 74.3  | 7.49  | 51  | 7 |
| Q9NR50     | Translatior11.5044248  | 3 | 4  | 3 | 50.2  | 6.47  | 54  | 3 |
| Q6MZM3     | Putative ur4.87408611  | 5 | 5  | 5 | 141.2 | 5.4   | 78  | 5 |
| O94905     | Erlin-2 OS=17.4041298  | 6 | 8  | 4 | 37.8  | 5.62  | 112 | 6 |
| E9PR30     | 40S riboson 12.244898  | 3 | 6  | 3 | 10.9  | 11.56 | 146 | 3 |



|            |             |              |   |   |   |       |       |     |   |
|------------|-------------|--------------|---|---|---|-------|-------|-----|---|
| Q6XQN6     | Nicotinate  | 8.55018587   | 3 | 3 | 3 | 57.5  | 5.68  | 123 | 3 |
| Q9BXYO     | Protein MA  | 6            | 1 | 2 | 1 | 35.3  | 5.38  | 124 | 1 |
| 000233     | 26S proteas | 24.6636771   | 5 | 6 | 5 | 24.7  | 6.95  | 27  | 5 |
| P18858     | DNA ligase  | 7.50816104   | 5 | 5 | 5 | 101.7 | 5.62  | 60  | 5 |
| B2R642     | cDNA, FLJ9  | 12.3839009   | 4 | 5 | 4 | 71.6  | 5.76  | 83  | 4 |
| Q9Y3P9     | Rab GTPase  | 4.77081384   | 4 | 4 | 4 | 121.7 | 5.25  | 140 | 4 |
| 000217     | NADH dehydr | 27.1428571   | 5 | 5 | 5 | 23.7  | 6.34  | 109 | 5 |
| P11717     | Cation-ind  | 2.81011642   | 5 | 5 | 5 | 274.2 | 5.94  | 85  | 5 |
| B2RCZ4     | Protein kir | 10.2214651   | 4 | 5 | 1 | 67.2  | 5.9   | 54  | 4 |
| Q5JSZ5     | Protein PR  | 3.94795873   | 6 | 7 | 5 | 242.8 | 8.34  | 116 | 6 |
| Q9Y3B3     | Transmembr  | 18.75        | 3 | 4 | 3 | 25.2  | 6.89  | 107 | 3 |
| Q06587     | E3 ubiquiti | 16.9950739   | 5 | 5 | 5 | 42.4  | 5.62  | 138 | 5 |
| Q7Z2K6     | Endoplasmic | 7.07964602   | 5 | 7 | 5 | 100.2 | 7.52  | 55  | 5 |
| Q9Y277     | Voltage-dep | 20.8480565   | 5 | 7 | 4 | 30.6  | 8.66  | 79  | 5 |
| G3V4P8     | Glia matur  | 42.6666667   | 4 | 4 | 4 | 17.5  | 5.31  | 67  | 4 |
| 060232     | Sjoegren sy | 24.120603    | 2 | 2 | 2 | 21.5  | 5.24  | 119 | 2 |
| 043504     | Ragulator   | 59.3406593   | 2 | 2 | 2 | 9.6   | 4.87  | 134 | 2 |
| Q53FR9     | COMM domai  | 17.1717172   | 3 | 4 | 3 | 21.8  | 5.88  | 80  | 3 |
| Q8NE86     | Calcium uni | 11.3960114   | 3 | 6 | 3 | 39.8  | 8.65  | 98  | 3 |
| P35573     | Glycogen de | 4.6997389    | 6 | 7 | 6 | 174.7 | 6.76  | 64  | 6 |
| Q969H8     | Myeloid-de  | 24.8554913   | 4 | 6 | 4 | 18.8  | 6.68  | 113 | 4 |
| Q16643     | Drebrin OS  | 8.93682589   | 4 | 5 | 4 | 71.4  | 4.45  | 113 | 4 |
| Q96TA2     | ATP-depend  | 9.83182406   | 5 | 6 | 5 | 86.4  | 8.76  | 86  | 5 |
| B3KPZ2     | cDNA FLJ3   | 216.7108753  | 4 | 4 | 4 | 41.9  | 9.16  | 108 | 4 |
| Q8NI36     | WD repeat   | 5.99369085   | 5 | 6 | 5 | 105.3 | 7.53  | 83  | 5 |
| Q9C0C9     | (E3-indepe  | 5.34055728   | 5 | 6 | 5 | 141.2 | 5.12  | 80  | 5 |
| Q53GN7     | Mitochondri | 13.2118451   | 4 | 5 | 4 | 50.3  | 8.12  | 49  | 4 |
| Q9NQ15     | Exosome con | 24.7272727   | 3 | 3 | 3 | 29.6  | 8.1   | 76  | 3 |
| 000154     | Cytosolic   | 13.9473684   | 4 | 6 | 4 | 41.8  | 8.54  | 77  | 4 |
| E7ESZ7     | NADH dehydr | 19.7435897   | 5 | 5 | 5 | 44.7  | 8.34  | 70  | 5 |
| P00505     | Aspartate   | 15.1162791   | 4 | 4 | 4 | 47.5  | 9.01  | 81  | 4 |
| B2R4A2     | Cytochrome  | 40.5405405   | 3 | 4 | 3 | 13.5  | 8.27  | 50  | 3 |
| Q96QD8     | Sodium-cou  | 4.15019763   | 1 | 2 | 1 | 56    | 8     | 113 | 1 |
| Q8WXF1     | Paraspeckl  | 7.64818356   | 3 | 4 | 2 | 58.7  | 6.67  | 106 | 3 |
| Q13620     | Cullin-4B   | (7.77656079  | 6 | 7 | 2 | 103.9 | 7.37  | 74  | 6 |
| Q92620     | Pre-mRNA-s  | 5.4604727    | 4 | 4 | 4 | 140.4 | 6.54  | 66  | 4 |
| P61081     | NEDD8-conj  | 32.7868852   | 5 | 5 | 5 | 20.9  | 7.69  | 125 | 5 |
| Q8TC12     | Retinol def | 19.8113208   | 5 | 5 | 5 | 35.4  | 8.82  | 115 | 5 |
| P53701     | Cytochrome  | 24.2537313   | 7 | 8 | 7 | 30.6  | 6.68  | 75  | 7 |
| Q86X55     | Histone-ar  | 6.25         | 3 | 5 | 3 | 65.8  | 6.73  | 90  | 3 |
| Q53G26     | DnaJ (Hsp   | 413.5416667  | 5 | 6 | 5 | 52.5  | 9.26  | 36  | 5 |
| D6R8W1     | Eukaryotic  | 13.0612245   | 3 | 4 | 3 | 28.5  | 8.12  | 149 | 3 |
| B2RDK6     | cDNA, FLJ9  | 15.0289017   | 4 | 6 | 2 | 38.9  | 7.87  | 118 | 4 |
| Q9NT62     | Ubiquitin   | 116.5605096  | 4 | 4 | 4 | 35.8  | 4.74  | 126 | 4 |
| P41743     | Protein kir | 10.9060403   | 4 | 5 | 1 | 68.2  | 5.85  | 54  | 4 |
| Q15631     | Translin    | 016.6666667  | 3 | 4 | 3 | 26.2  | 6.44  | 44  | 3 |
| Q14TF0     | Glutamate   | 6.43642072   | 3 | 4 | 3 | 72.7  | 6.09  | 59  | 3 |
| P34949     | Mannose-6   | 15.3664303   | 4 | 6 | 4 | 46.6  | 5.95  | 81  | 4 |
| AOA0B4J1V9 | Helicase,   | 17.35294118  | 6 | 7 | 6 | 102.7 | 7.65  | 96  | 6 |
| 043252     | Bifunction  | 6.08974359   | 3 | 4 | 2 | 70.8  | 6.86  | 87  | 3 |
| B3KMT2     | cDNA FLJ1   | 214.65116279 | 4 | 5 | 2 | 92    | 5.76  | 51  | 4 |
| Q9NW82     | WD repeat   | 9.32721713   | 5 | 5 | 5 | 73.2  | 6.33  | 77  | 5 |
| AOA024R7JO | Protein kir | 13.1054131   | 3 | 4 | 1 | 40.6  | 8.79  | 50  | 3 |
| Q8WXA9     | Splicing re | 6.2992126    | 2 | 4 | 2 | 59.3  | 10.39 | 138 | 2 |
| B2RAH5     | Protein ph  | 3.78640777   | 3 | 4 | 3 | 115.3 | 5.43  | 144 | 3 |
| Q02241     | Kinesin-li  | 5.9375       | 4 | 5 | 4 | 110   | 8.51  | 82  | 4 |
| Q99805     | Transmembr  | 4.97737557   | 3 | 4 | 3 | 75.7  | 7.44  | 38  | 3 |
| Q9BWJ5     | Splicing f  | 59.3023256   | 3 | 5 | 3 | 10.1  | 6.35  | 45  | 3 |
| X5D907     | Fragile X   | 13.4680135   | 6 | 7 | 5 | 66.9  | 7.23  | 119 | 6 |
| 094874     | E3 UFM1-pr  | 8.56423174   | 6 | 6 | 6 | 89.5  | 6.79  | 77  | 6 |
| 000566     | U3 small nt | 10.7195301   | 4 | 5 | 4 | 78.8  | 4.86  | 31  | 4 |
| Q9BQA1     | Methylsom   | 19.005848    | 4 | 4 | 4 | 36.7  | 5.17  | 78  | 4 |
| A3F768     | NF-kappaB   | 10           | 6 | 6 | 6 | 77.5  | 8.73  | 53  | 6 |
| Q86TC9     | Myopalladi  | 7.42424242   | 7 | 7 | 6 | 145.2 | 6.77  | 62  | 7 |
| G5E975     | SWI/SNF re  | 116.4974619  | 3 | 6 | 3 | 45    | 5.76  | 78  | 3 |
| Q9Y6K5     | 2'-5' -olig | 8.92364305   | 5 | 6 | 5 | 121.1 | 8.4   | 43  | 5 |
| B2R5Y4     | cDNA, FLJ9  | 15.2603232   | 6 | 8 | 6 | 65.6  | 6.64  | 81  | 6 |
| Q9UBU9     | Nuclear RN  | 9.53150242   | 4 | 4 | 4 | 70.1  | 8.51  | 81  | 4 |
| Q6IB54     | ATP syntha  | 34.2592593   | 3 | 4 | 3 | 12.6  | 9.52  | 40  | 3 |
| Q6PJJ2     | RRP1 protei | 14.3776824   | 6 | 6 | 6 | 53.4  | 9.48  | 134 | 6 |
| Q9NY12     | H/ACA ribo  | 14.2857143   | 3 | 4 | 3 | 22.3  | 10.92 | 46  | 3 |
| Q15392     | Delta (24)  | 11.627907    | 6 | 7 | 6 | 60.1  | 8.16  | 58  | 6 |
| Q8WWQ0     | PH-interact | 3.62438221   | 4 | 4 | 4 | 206.6 | 8.85  | 104 | 4 |

|            |               |             |   |    |   |       |       |     |   |
|------------|---------------|-------------|---|----|---|-------|-------|-----|---|
| Q5SRQ6     | Casein kinase | 20.9401709  | 3 | 5  | 3 | 26.9  | 5.96  | 67  | 3 |
| Q9H814     | Phosphorylase | 6.85279188  | 2 | 3  | 2 | 44.4  | 5.4   | 144 | 2 |
| B4DPD5     | Ubiquitin     | 122.7272727 | 5 | 5  | 5 | 35.2  | 5.59  | 71  | 5 |
| AOA0AOMR66 | RNA binding   | 7.63819095  | 4 | 4  | 4 | 110.3 | 6.28  | 49  | 4 |
| B4E1J8     | cDNA FLJ5625  | 6302521     | 5 | 6  | 2 | 27.2  | 9.66  | 83  | 5 |
| Q6P587     | Acylpyruvate  | 27.2321429  | 3 | 3  | 3 | 24.8  | 7.39  | 71  | 3 |
| P62314     | Small nucle   | 27.7310924  | 2 | 4  | 2 | 13.3  | 11.56 | 84  | 2 |
| E7ERK9     | Translation   | 11.2132353  | 3 | 4  | 3 | 59.7  | 9.42  | 142 | 3 |
| Q9Y4Y9     | U6 snRNA-as   | 26.3736264  | 2 | 3  | 2 | 9.9   | 4.54  | 62  | 2 |
| Q8WW12     | PEST prote    | 33.1460674  | 4 | 5  | 4 | 18.9  | 7.49  | 96  | 4 |
| Q6FGU2     | DTYMK prote   | 20.2830189  | 4 | 5  | 4 | 23.8  | 8.27  | 104 | 4 |
| Q14318     | Peptidyl-p    | 13.1067961  | 4 | 5  | 4 | 44.5  | 4.84  | 97  | 4 |
| Q9NPD3     | Exosome con   | 21.6326531  | 4 | 4  | 4 | 26.4  | 6.52  | 89  | 4 |
| Q14696     | LDLR chaper   | 24.7863248  | 3 | 5  | 3 | 26.1  | 7.78  | 49  | 3 |
| P82650     | 28S ribosom   | 9.16666667  | 3 | 4  | 3 | 41.3  | 7.9   | 115 | 3 |
| P50897     | Palmitoyl-    | 19.2810458  | 4 | 4  | 4 | 34.2  | 6.52  | 106 | 4 |
| Q4QQP8     | PTGFRN prot   | 8.50253807  | 4 | 4  | 4 | 88.2  | 6.65  | 85  | 4 |
| Q6IPL9     | HMGAl prote   | 28.0373832  | 2 | 10 | 1 | 11.6  | 11.06 | 179 | 2 |
| Q15437     | Protein tr    | 4.95436767  | 3 | 7  | 3 | 86.4  | 6.89  | 72  | 3 |
| Q6IPI1     | 60S ribosom   | 22.9813665  | 4 | 12 | 4 | 17.9  | 11.66 | 215 | 4 |
| AOA0S2Z5M1 | SEC63-like    | 10.9210526  | 5 | 5  | 5 | 87.9  | 5.31  | 30  | 5 |
| P56134     | ATP synthas   | 42.5531915  | 4 | 5  | 2 | 10.9  | 9.67  | 118 | 4 |
| AOA024R1U2 | PHD finger    | 48.1818182  | 4 | 5  | 4 | 12.4  | 8.41  | 197 | 4 |
| Q7Z4W1     | L-xylulose    | 21.7213115  | 5 | 6  | 5 | 25.9  | 8.1   | 102 | 5 |
| AOA0S2Z5H0 | Mitochondri   | 26.5625     | 3 | 3  | 3 | 21.4  | 9.1   | 91  | 3 |
| P10644     | cAMP-depend   | 12.8608924  | 4 | 5  | 4 | 43    | 5.35  | 55  | 4 |
| Q9Y5X3     | Sorting nex   | 13.3663366  | 4 | 4  | 4 | 46.8  | 6.76  | 87  | 4 |
| AOA0S2Z5U3 | Heterogene    | 10.4712042  | 5 | 5  | 4 | 63.6  | 7.3   | 84  | 5 |
| O75663     | TIP41-like    | 26.4705882  | 5 | 7  | 5 | 31.4  | 5.91  | 58  | 5 |
| AOA024R3M1 | Thymocyte r   | 20          | 4 | 5  | 4 | 25.7  | 9.25  | 53  | 4 |
| Q9Y237     | Peptidyl-p    | 33.5877863  | 2 | 3  | 2 | 13.8  | 9.77  | 65  | 2 |
| Q9BS40     | Latexin OS-   | 14.8648649  | 3 | 5  | 3 | 25.7  | 5.78  | 111 | 3 |
| E7EVH7     | Uncharacter   | 10.5191257  | 6 | 7  | 4 | 83.6  | 7.31  | 66  | 6 |
| Q9Y6C9     | Mitochondri   | 21.7821782  | 5 | 6  | 5 | 33.3  | 7.97  | 86  | 5 |
| Q9UPN9     | E3 ubiquiti   | 6.74356699  | 6 | 6  | 6 | 122.5 | 6.67  | 109 | 6 |
| P55039     | Development   | 14.2857143  | 4 | 4  | 3 | 40.7  | 8.88  | 102 | 4 |
| Q59FD4     | Hexokinase    | 5.58482613  | 5 | 5  | 3 | 105.7 | 6.84  | 154 | 5 |
| P49589     | Cysteine--    | 17.88770053 | 5 | 6  | 5 | 85.4  | 6.76  | 60  | 5 |
| P14384     | Carboxypept   | 4.28893905  | 1 | 2  | 1 | 50.5  | 7.36  | 105 | 1 |
| P46459     | Vesicle-fu    | 11.6935484  | 8 | 8  | 8 | 82.5  | 6.95  | 79  | 8 |
| Q7L9L4     | MOB kinase    | 18.0555556  | 4 | 5  | 4 | 25.1  | 6.73  | 80  | 4 |
| P22059     | Oxysterol-t   | 8.42627014  | 5 | 5  | 5 | 89.4  | 7.3   | 48  | 5 |
| P61764     | Syntaxin-bi   | 11.7845118  | 5 | 5  | 5 | 67.5  | 6.96  | 62  | 5 |
| P80217     | Interferon-   | 16.0839161  | 4 | 5  | 4 | 31.5  | 6.09  | 99  | 4 |
| Q15042     | Rab3 GTPase   | 4.89296636  | 3 | 3  | 3 | 110.5 | 5.55  | 106 | 3 |
| Q15067     | Peroxisomall  | 11.6666667  | 4 | 4  | 4 | 74.4  | 8.16  | 69  | 4 |
| F5H5P2     | Uncharacter   | 10.4384134  | 3 | 4  | 3 | 54.2  | 6.43  | 123 | 3 |
| F1T0A5     | PRP31 pre-n   | 14.2284569  | 4 | 4  | 4 | 55.4  | 5.78  | 79  | 4 |
| Q5HYL4     | Putative ur   | 7.70440252  | 2 | 4  | 2 | 69.4  | 7.28  | 92  | 2 |
| P27144     | Adenylate P   | 21.5246637  | 4 | 6  | 4 | 25.3  | 8.4   | 58  | 4 |
| Q9Y2Z0     | Protein SG1   | 11.5068493  | 3 | 4  | 3 | 41    | 5.16  | 58  | 3 |
| B2RE59     | cDNA, FLJ9    | 19.7324415  | 4 | 4  | 4 | 33.6  | 8.03  | 50  | 4 |
| AOA0B4J2E5 | Uncharacter   | 7.83460283  | 5 | 5  | 5 | 102.4 | 6.2   | 70  | 5 |
| B4DJ38     | cDNA FLJ56    | 4.53938585  | 3 | 4  | 1 | 84.1  | 8.57  | 116 | 3 |
| Q504R6     | RAB13 prote   | 23.3606557  | 6 | 8  | 5 | 27.2  | 8.9   | 121 | 6 |
| Q9BSH4     | Translation   | 25.5892256  | 4 | 4  | 4 | 32.5  | 8.13  | 37  | 4 |
| Q9Y508     | E3 ubiquiti   | 11.4035088  | 3 | 4  | 3 | 25.7  | 7.25  | 76  | 3 |
| D3DWY7     | von Hippel-   | 27.8969957  | 4 | 7  | 4 | 26.5  | 9.01  | 122 | 4 |
| P62306     | Small nucle   | 43.0232558  | 3 | 5  | 3 | 9.7   | 4.67  | 79  | 3 |
| O95453     | Poly(A)-spe   | 9.54616588  | 5 | 6  | 5 | 73.4  | 6.2   | 101 | 5 |
| Q32P28     | Prolyl 3-h    | 9.23913043  | 4 | 4  | 4 | 83.3  | 5.14  | 106 | 4 |
| AOA140VJI4 | Testicular    | 18.0327869  | 3 | 5  | 3 | 13.3  | 8.35  | 67  | 3 |
| P99999     | Cytochrome    | 56.1904762  | 5 | 5  | 5 | 11.7  | 9.57  | 74  | 5 |
| B3KM21     | Family wit    | 22.8813559  | 3 | 4  | 3 | 13.3  | 8.76  | 98  | 3 |
| HOYMV8     | 40S ribosom   | 36          | 4 | 7  | 1 | 11.3  | 9.32  | 131 | 4 |
| P41223     | Protein BUI   | 36.8055556  | 4 | 5  | 4 | 17    | 8.82  | 61  | 4 |
| Q9HCE1     | Putative he   | 6.38085743  | 6 | 7  | 6 | 113.6 | 8.82  | 80  | 6 |
| B4E1N4     | cDNA FLJ61    | 10.4234528  | 3 | 3  | 3 | 70    | 10.37 | 38  | 3 |
| B2RB89     | Protein kir   | 12.2507123  | 3 | 4  | 1 | 40.6  | 8.78  | 50  | 3 |
| P49902     | Cytosolic p   | 9.80392157  | 3 | 3  | 3 | 64.9  | 6.14  | 79  | 3 |
| O75436     | Vacuolar pi   | 17.1253823  | 4 | 4  | 4 | 38.1  | 6.57  | 110 | 4 |
| Q14651     | Plastin-1     | (5.72337043 | 3 | 5  | 1 | 70.2  | 5.41  | 115 | 3 |
| P35251     | Replicatio    | 8.71080139  | 7 | 7  | 7 | 128.2 | 9.36  | 55  | 7 |

|            |             |              |   |    |   |       |       |     |   |
|------------|-------------|--------------|---|----|---|-------|-------|-----|---|
| Q9COC2     | 182 kDa tar | 4.048583     | 4 | 5  | 4 | 181.7 | 4.86  | 35  | 4 |
| Q5M775     | Cytospin-B  | 6.64794007   | 5 | 5  | 5 | 118.5 | 6.7   | 66  | 5 |
| HOY8X4     | 2'-deoxynuc | 6.99588477   | 1 | 2  | 1 | 25.9  | 5.5   | 119 | 1 |
| Q9UKN8     | General tra | 9.7323601    | 6 | 6  | 6 | 91.9  | 6.65  | 64  | 6 |
| Q9BW92     | Threonine-- | 6.40668524   | 5 | 5  | 4 | 81    | 7.3   | 56  | 5 |
| O95197     | Reticulon-ε | 3.77906977   | 1 | 3  | 1 | 112.5 | 4.96  | 0   | 1 |
| Q9BS26     | Endoplasmic | 15.270936    | 6 | 7  | 5 | 46.9  | 5.26  | 74  | 6 |
| B2RBB2     | cDNA, FLJ9  | 9.72972973   | 4 | 4  | 4 | 61.6  | 6.49  | 104 | 4 |
| P23434     | Glycine cle | 13.2947977   | 2 | 2  | 2 | 18.9  | 4.88  | 81  | 2 |
| Q9UKF6     | Cleavage ar | 6.57894737   | 4 | 5  | 4 | 77.4  | 5.6   | 86  | 4 |
| AOA087XOR6 | Sorting ne  | 37.7906977   | 7 | 9  | 6 | 19.8  | 7.78  | 93  | 7 |
| Q86W42     | THO comple  | 12.6099707   | 3 | 3  | 3 | 37.5  | 7.43  | 81  | 3 |
| K7EIK7     | Echinoderm  | 6.20957309   | 4 | 5  | 4 | 84.7  | 6.87  | 68  | 4 |
| P61086     | Ubiquitin-c | 22.5         | 3 | 4  | 3 | 22.4  | 5.44  | 78  | 3 |
| B2RDN3     | Cytosolic f | 20.6642066   | 3 | 3  | 3 | 28.9  | 5.83  | 105 | 3 |
| AOA023T787 | RNA-binding | 22.4137931   | 3 | 5  | 3 | 19.9  | 5.72  | 70  | 3 |
| Q9Y3C1     | Nucleolar r | 32.5842697   | 4 | 4  | 4 | 21.2  | 9.94  | 74  | 4 |
| Q13404     | Ubiquitin-c | 41.4965986   | 5 | 7  | 3 | 16.5  | 7.93  | 125 | 5 |
| Q12849     | G-rich seq  | 10.625       | 4 | 5  | 4 | 53.1  | 6.19  | 51  | 4 |
| B2R7C2     | cDNA, FLJ9  | 4.87804878   | 4 | 5  | 4 | 88.8  | 6.27  | 70  | 4 |
| V9HW87     | Abhydrolase | 21.9047619   | 3 | 3  | 3 | 22.3  | 6.4   | 80  | 3 |
| B2RDR4     | cDNA, FLJ9  | 18.7648456   | 5 | 5  | 5 | 47.9  | 7.68  | 43  | 5 |
| O60306     | Intron-binc | 7.13804714   | 6 | 6  | 6 | 171.2 | 6.37  | 0   | 6 |
| Q68D08     | Putative ur | 16.3580247   | 4 | 6  | 4 | 36.7  | 6.06  | 92  | 4 |
| B5ME97     | Septin 10,  | 13.0514706   | 5 | 5  | 5 | 62.9  | 6.83  | 41  | 5 |
| Q13572     | Inositol-t  | 13.52657     | 3 | 4  | 3 | 45.6  | 6.16  | 83  | 3 |
| P46937     | Transcripti | 14.484127    | 3 | 3  | 3 | 54.4  | 5.17  | 43  | 3 |
| O00560     | Syntenin-1  | 27.5167785   | 5 | 6  | 5 | 32.4  | 7.53  | 46  | 5 |
| Q08257     | Quinone ox  | 17.6291793   | 3 | 4  | 3 | 35.2  | 8.44  | 46  | 3 |
| P61024     | Cyclin-dep  | 32.9113924   | 2 | 3  | 2 | 9.7   | 8.94  | 85  | 2 |
| P56199     | Integrin al | 4.91942324   | 5 | 5  | 5 | 130.8 | 6.29  | 84  | 5 |
| Q8WXI9     | Transcripti | 11.1298482   | 5 | 5  | 5 | 65.2  | 9.7   | 64  | 5 |
| O60493     | Sorting ne  | 44.4444444   | 7 | 7  | 6 | 18.8  | 8.66  | 127 | 7 |
| J3QLS3     | 28S riboso  | 19.5571956   | 5 | 5  | 5 | 31.7  | 9.86  | 37  | 5 |
| P04040     | Catalase O  | 5.5028463    | 2 | 2  | 2 | 59.7  | 7.39  | 115 | 2 |
| I3L3T0     | HCG15164,   | i21.3793103  | 2 | 2  | 2 | 15.9  | 9.92  | 123 | 2 |
| P56556     | NADH dehyd  | 22.7272727   | 3 | 4  | 3 | 17.9  | 10.14 | 73  | 3 |
| O43813     | LanC-like r | 10.7769424   | 4 | 6  | 4 | 45.3  | 7.75  | 63  | 4 |
| B4DT57     | cDNA FLJ6   | 12.8888889   | 5 | 5  | 2 | 50    | 5.6   | 122 | 5 |
| Q9Y3D9     | 28S riboso  | 30           | 3 | 12 | 3 | 21.8  | 8.9   | 49  | 3 |
| Q8IZP0     | Abl interac | 10.2362205   | 4 | 5  | 4 | 55    | 7.06  | 84  | 4 |
| Q06265     | Exosome con | 9.11161731   | 3 | 3  | 3 | 48.9  | 5.29  | 112 | 3 |
| Q8NF37     | Lysophosph  | 10.8614232   | 5 | 6  | 5 | 59.1  | 6.02  | 84  | 5 |
| Q92797     | Symplekin   | (4.23861852  | 3 | 4  | 3 | 141.1 | 6.13  | 101 | 3 |
| B5BU16     | Mitogen-ac  | 11.3772455   | 3 | 4  | 3 | 37.4  | 7.06  | 74  | 3 |
| Q9GZR7     | ATP-depend  | 10.4772992   | 5 | 5  | 5 | 96.3  | 9.06  | 40  | 5 |
| Q8TDB8     | Solute car  | 5.57692308   | 3 | 4  | 3 | 56.3  | 7.83  | 120 | 3 |
| Q9UBW8     | COP9 signa  | 23.6363636   | 3 | 3  | 3 | 30.3  | 8.22  | 86  | 3 |
| H3BND4     | Pyridoxal-  | 10.4218362   | 4 | 4  | 4 | 88.7  | 5.48  | 83  | 4 |
| O43159     | Ribosomal F | 12.9385965   | 4 | 4  | 4 | 50.7  | 9.42  | 70  | 4 |
| Q9NZI8     | Insulin-li  | 9.18544194   | 4 | 4  | 2 | 63.4  | 9.2   | 103 | 4 |
| B4DNC0     | cDNA FLJ6   | 11.9.8540146 | 2 | 3  | 2 | 30.6  | 8.37  | 92  | 2 |
| B2R5S3     | cDNA, FLJ9  | 12.0350109   | 4 | 4  | 4 | 50.2  | 8.31  | 59  | 4 |
| C9J5N1     | PTGES3L-AA  | 11.3131313   | 4 | 4  | 4 | 55    | 6.55  | 50  | 4 |
| Q15654     | Thyroid rec | 6.09243697   | 2 | 3  | 2 | 50.3  | 7.37  | 62  | 2 |
| AOA0AOMSW4 | Phosphatid  | 20.6642066   | 4 | 4  | 4 | 31.6  | 6.87  | 50  | 4 |
| Q9NQW7     | Xaa-Pro ami | 6.58105939   | 3 | 3  | 3 | 69.9  | 5.67  | 73  | 3 |
| Q96HY6     | DDR GK dom  | 4.45859873   | 1 | 2  | 1 | 35.6  | 5.12  | 136 | 1 |
| AOA087WT20 | DDB1- and   | (7.20268007  | 3 | 4  | 3 | 67.5  | 9.29  | 77  | 3 |
| Q6ZRP7     | Sulfhydryl  | 3.86819484   | 2 | 3  | 2 | 77.5  | 7.72  | 115 | 2 |
| Q59H39     | Signal trar | 7.99492386   | 6 | 6  | 6 | 89.9  | 6.2   | 76  | 6 |
| X5CMJ9     | Proteasome  | 9.42028986   | 2 | 3  | 2 | 30.3  | 7.43  | 117 | 2 |
| P51570     | Galactokin  | 8.16326531   | 3 | 4  | 3 | 42.2  | 6.46  | 66  | 3 |
| B3KM47     | cDNA FLJ10  | 6.3          | 4 | 4  | 4 | 111   | 5.45  | 52  | 4 |
| Q5HY81     | Ubiquitin-1 | 28.8888889   | 4 | 4  | 4 | 20.5  | 9.55  | 34  | 4 |
| Q9Y6G9     | Cytoplasmic | 8.41300191   | 3 | 3  | 3 | 56.5  | 6.42  | 80  | 3 |
| Q8IWA0     | WD repeat-  | 6.38554217   | 3 | 3  | 3 | 94.4  | 5.96  | 94  | 3 |
| Q9BX68     | Histidine t | 36.809816    | 4 | 4  | 4 | 17.2  | 9.16  | 62  | 4 |
| P62310     | U6 snRNA-a  | s46.0784314  | 4 | 5  | 4 | 11.8  | 4.7   | 106 | 4 |
| Q9BV40     | Vesicle-as  | 45           | 4 | 6  | 4 | 11.4  | 7.34  | 82  | 4 |
| Q9Y3B9     | RRP15-like  | 13.4751773   | 4 | 4  | 4 | 31.5  | 5.52  | 102 | 4 |
| P14854     | Cytochrome  | 58.1395349   | 3 | 3  | 3 | 10.2  | 7.05  | 47  | 3 |
| P20645     | Cation-dep  | 11.5523466   | 2 | 2  | 2 | 31    | 5.83  | 167 | 2 |

|            |                               |   |   |   |       |       |     |   |
|------------|-------------------------------|---|---|---|-------|-------|-----|---|
| Q13641     | Trophoblast7.14285714         | 2 | 2 | 2 | 46    | 6.83  | 113 | 2 |
| O00629     | Importin st10.3646833         | 3 | 3 | 3 | 57.9  | 4.96  | 78  | 3 |
| O14548     | Cytochrome 49.122807          | 3 | 3 | 3 | 12.6  | 9.42  | 100 | 3 |
| Q9H2M9     | Rab3 GTPase3.73295047         | 4 | 5 | 4 | 155.9 | 5.62  | 104 | 4 |
| Q5T8P6     | RNA-binding6.85203575         | 6 | 6 | 6 | 113.5 | 9.16  | 75  | 6 |
| Q32Q14     | NDUFA7 prot23.1404959         | 3 | 4 | 3 | 13.5  | 10.4  | 58  | 3 |
| HOY368     | Dolichol-pi17.2881356         | 4 | 5 | 4 | 33.3  | 9.14  | 83  | 4 |
| A0A0B4J1V8 | HCG2039996 7.55667506         | 3 | 3 | 3 | 87.9  | 9.51  | 61  | 3 |
| Q5SRE5     | Nucleoporin3.71640938         | 6 | 6 | 6 | 195.9 | 6.73  | 92  | 6 |
| O75940     | Survival of20.5882353         | 4 | 5 | 4 | 26.7  | 7.24  | 34  | 4 |
| Q12873     | Chromodomain 2.4              | 4 | 4 | 1 | 226.5 | 7.3   | 96  | 4 |
| P20839     | Inosine-5'-13.4241245         | 5 | 5 | 4 | 55.4  | 6.9   | 55  | 5 |
| B2R9D9     | cDNA, FLJ945.08474576         | 1 | 2 | 1 | 38.5  | 7.21  | 87  | 1 |
| J3QK89     | Calcium home6.25674218        | 3 | 3 | 3 | 104.9 | 9.19  | 50  | 3 |
| Q6FH36     | Peptidyl-pi32.2033898         | 6 | 6 | 5 | 19.2  | 8.07  | 30  | 6 |
| A0A0S2Z5J4 | Adaptor-rele4.66179159        | 4 | 4 | 4 | 121.2 | 6.04  | 109 | 4 |
| P09496     | Clathrin like1.1451613        | 5 | 9 | 5 | 27.1  | 4.51  | 129 | 5 |
| P49959     | Double-strand7.62711864       | 4 | 4 | 4 | 80.5  | 5.9   | 64  | 4 |
| A8ASI8     | BH3 interaction28.2051282     | 4 | 4 | 4 | 22    | 5.44  | 51  | 4 |
| Q15738     | Sterol-4-ald14.4772118        | 4 | 4 | 4 | 41.9  | 8.06  | 98  | 4 |
| O75691     | Small subunit1.93895871       | 5 | 5 | 5 | 318.2 | 7.39  | 60  | 5 |
| Q9Y5K6     | CD2-associated10.9546166      | 5 | 5 | 5 | 71.4  | 6.4   | 65  | 5 |
| J3KQ18     | D-dopachrone28.7878788        | 3 | 3 | 3 | 14.2  | 7.3   | 83  | 3 |
| B2RB52     | cDNA, FLJ945.0671141          | 4 | 5 | 4 | 49.8  | 9.44  | 69  | 4 |
| Q8TED0     | U3 small nuclear13.5135135    | 4 | 4 | 4 | 58.4  | 9.11  | 40  | 4 |
| Q9UNS2     | COP9 signal15.3664303         | 4 | 4 | 4 | 47.8  | 6.65  | 59  | 4 |
| E9PAU2     | Ribonucleoprotein9.12698413   | 4 | 4 | 4 | 79.5  | 8.92  | 53  | 4 |
| Q86UK7     | E3 ubiquitin6.0840708         | 4 | 4 | 4 | 98.6  | 8.4   | 100 | 4 |
| A0A0A0MTJ9 | Neutral chromosome9.15178571  | 3 | 3 | 3 | 49.9  | 7.21  | 110 | 3 |
| E7EQY1     | Protein FAM20.4081633         | 5 | 5 | 5 | 26.8  | 8.24  | 140 | 5 |
| Q00765     | Receptor epsilon16.9312169    | 4 | 5 | 4 | 21.5  | 8.1   | 82  | 4 |
| P49821     | NADH dehydrogenase17.2413793  | 3 | 3 | 3 | 50.8  | 8.21  | 41  | 3 |
| P53384     | Cytosolic factor17.5          | 4 | 4 | 4 | 34.5  | 5.33  | 39  | 4 |
| Q02978     | Mitochondrial16.5605096       | 4 | 4 | 4 | 34    | 9.91  | 98  | 4 |
| Q96GA3     | Protein LTV6.73684211         | 2 | 2 | 2 | 54.8  | 4.91  | 93  | 2 |
| Q9NXV6     | CDKN2A-interacting11.0344828  | 5 | 5 | 5 | 61.1  | 9.01  | 114 | 5 |
| A8K607     | cDNA FLJ7643.67985281         | 3 | 3 | 3 | 123.8 | 6.34  | 97  | 3 |
| Q6IAX1     | FDFT1 protein9.35251799       | 3 | 3 | 3 | 48.1  | 6.54  | 78  | 3 |
| P21399     | Cytoplasmic8.43644544         | 4 | 5 | 4 | 98.3  | 6.68  | 53  | 4 |
| Q99575     | Ribonucleoprotein6.4453125    | 4 | 4 | 4 | 114.6 | 9.22  | 90  | 4 |
| Q92896     | Golgi apparatus4.07124682     | 4 | 4 | 4 | 134.5 | 6.9   | 93  | 4 |
| Q8WTT2     | Nucleolar component7          | 6 | 6 | 6 | 92.5  | 9.17  | 71  | 6 |
| Q9NVX2     | Notchless protein8.65979381   | 3 | 3 | 3 | 53.3  | 7.34  | 71  | 3 |
| P61960     | Ubiquitin-141.1764706         | 1 | 2 | 1 | 9.1   | 9.31  | 60  | 1 |
| B2R7X3     | cDNA, FLJ945.6.0822898        | 3 | 4 | 3 | 61.5  | 7.49  | 121 | 3 |
| Q10570     | Cleavage factor3.46500347     | 4 | 4 | 4 | 160.8 | 6.4   | 137 | 4 |
| Q96B26     | Exosome component14.4927536   | 3 | 3 | 3 | 30    | 5.3   | 86  | 3 |
| Q9Y570     | Protein phosphatase11.9170984 | 4 | 5 | 4 | 42.3  | 5.97  | 126 | 4 |
| O95218     | Zinc finger13.030303          | 4 | 5 | 4 | 37.4  | 10.01 | 87  | 4 |
| Q9Y2S7     | Polymerase25                  | 5 | 5 | 5 | 42    | 8.63  | 51  | 5 |
| P14635     | G2/mitotic-7.852194           | 2 | 2 | 2 | 48.3  | 7.47  | 89  | 2 |
| P40937     | Replication14.1176471         | 3 | 3 | 3 | 38.5  | 7.2   | 76  | 3 |
| B3KNC3     | cDNA FLJ1442.8.5447263        | 6 | 6 | 6 | 84.9  | 5.62  | 74  | 6 |
| Q14014     | PR310 c-Kinase25.3333333      | 3 | 3 | 2 | 16.9  | 5.21  | 71  | 3 |
| Q12907     | Vesicular protein14.0449438   | 4 | 4 | 4 | 40.2  | 6.95  | 38  | 4 |
| Q9UHY7     | Enolase-phosphatase20.6896552 | 3 | 3 | 3 | 28.9  | 4.78  | 67  | 3 |
| P20674     | Cytochrome28                  | 4 | 8 | 4 | 16.8  | 6.79  | 71  | 4 |
| C9J8T6     | Cytochrome29.5918367          | 2 | 3 | 2 | 10.8  | 7.77  | 51  | 2 |
| E7EWR4     | Cleavage site11.3902848       | 5 | 7 | 3 | 62.9  | 6.87  | 126 | 5 |
| Q16204     | Coiled-coil11.6033755         | 4 | 5 | 4 | 53.3  | 7.34  | 48  | 4 |
| B2R841     | Serine/threonine7.960199      | 3 | 3 | 3 | 68.2  | 8.91  | 97  | 3 |
| Q15286     | Ras-related17.9104478         | 3 | 6 | 1 | 23    | 8.29  | 166 | 3 |
| Q9Y5L4     | Mitochondrial31.5789474       | 3 | 4 | 3 | 10.5  | 8.18  | 88  | 3 |
| P17813     | Endoglin8.96656535            | 4 | 4 | 4 | 70.5  | 6.61  | 55  | 4 |
| Q7Z460     | CLIP-associated2.86085826     | 3 | 4 | 2 | 169.3 | 9.03  | 67  | 3 |
| P60604     | Ubiquitin-c23.6363636         | 2 | 2 | 2 | 18.6  | 4.7   | 111 | 2 |
| O15427     | Monocarboxylate10.7526882     | 4 | 4 | 4 | 49.4  | 7.96  | 50  | 4 |
| Q16775     | Hydroxyacyl20.4545455         | 5 | 5 | 5 | 33.8  | 8.12  | 65  | 5 |
| Q96EN8     | Molybdenum4.16666667          | 3 | 4 | 3 | 98.1  | 6.7   | 73  | 3 |
| P05362     | Intercellular12.406015        | 4 | 4 | 4 | 57.8  | 7.99  | 95  | 4 |
| Q96Q11     | CCA tRNA nucleotide9.44700461 | 3 | 4 | 3 | 50.1  | 8.1   | 60  | 3 |
| Q9Y5A9     | YTH domain-12.6079447         | 5 | 5 | 5 | 62.3  | 8.79  | 51  | 5 |
| O15116     | U6 snRNA-associated12.0300752 | 1 | 2 | 1 | 15.2  | 5.22  | 93  | 1 |

|            |              |             |   |   |   |       |       |     |   |
|------------|--------------|-------------|---|---|---|-------|-------|-----|---|
| E5RIM7     | Copper tra   | 43.8356164  | 2 | 3 | 2 | 7.9   | 7.24  | 64  | 2 |
| P25490     | Transcripti  | 15.4589372  | 3 | 3 | 3 | 44.7  | 6.25  | 0   | 3 |
| Q9H2W6     | 39S riboso   | 15.4121864  | 3 | 3 | 3 | 31.7  | 7.05  | 139 | 3 |
| Q96BM9     | ADP-ribosyl  | 26.8817204  | 4 | 5 | 1 | 21.4  | 7.77  | 58  | 4 |
| Q9BZE1     | 39S riboso   | 8.03782506  | 2 | 2 | 2 | 48.1  | 8.59  | 74  | 2 |
| Q8IYS1     | Peptidase    | 19.40366972 | 3 | 3 | 3 | 47.7  | 5.85  | 66  | 3 |
| B3KMV8     | cDNA FLJ1276 | .34218289   | 4 | 5 | 1 | 74.7  | 8.38  | 74  | 4 |
| Q92614     | Unconventic  | 3.01850049  | 5 | 5 | 5 | 233   | 6.3   | 68  | 5 |
| B4DN80     | Peptidyl-pi  | 15.6028369  | 3 | 4 | 3 | 33    | 9.26  | 48  | 3 |
| Q9UBF2     | Coatomer st  | 4.5924225   | 3 | 4 | 1 | 97.6  | 5.81  | 62  | 3 |
| A4DOV4     | Capping prc  | 14.6853147  | 3 | 3 | 2 | 32.9  | 5.85  | 85  | 3 |
| P10155     | 60 kDa SS-/  | 9.85130112  | 4 | 4 | 4 | 60.6  | 8.03  | 81  | 4 |
| P78318     | Immunoglobl  | 15.6342183  | 5 | 5 | 5 | 39.2  | 5.38  | 70  | 5 |
| Q8TDD1     | ATP-depende  | 6.12939841  | 4 | 4 | 4 | 98.5  | 10.02 | 61  | 4 |
| Q969X6     | U3 small nr  | 9.32944606  | 6 | 6 | 6 | 76.8  | 8.85  | 61  | 6 |
| AOA024R473 | Mitochondri  | 11.1445783  | 2 | 2 | 2 | 37.5  | 8.4   | 67  | 2 |
| Q9UNFO     | Protein kir  | 8.64197531  | 3 | 4 | 3 | 55.7  | 5.2   | 65  | 3 |
| Q5RKY6     | Exosome con  | 20.5882353  | 4 | 6 | 4 | 28.2  | 6.28  | 65  | 4 |
| P23258     | Tubulin gan  | 8.64745011  | 3 | 3 | 3 | 51.1  | 6.14  | 70  | 3 |
| HOYL70     | Transducin-  | 6.39386189  | 3 | 3 | 3 | 84.4  | 7.27  | 48  | 3 |
| Q96TC7     | Regulator c  | 11.0638298  | 3 | 3 | 3 | 52.1  | 5.1   | 75  | 3 |
| Q13144     | Translatior  | 5.13176144  | 2 | 2 | 2 | 80.3  | 5.08  | 60  | 2 |
| Q96GM8     | Target of I  | 16.4705882  | 5 | 5 | 5 | 56.5  | 7.18  | 47  | 5 |
| Q6IB11     | PGRMC1 prot  | 23.5897436  | 3 | 3 | 3 | 21.7  | 4.7   | 90  | 3 |
| Q53Y06     | ATPase, H+   | 10.619469   | 2 | 3 | 2 | 26.1  | 8     | 103 | 2 |
| P50570     | Dynamin-2 (  | 7.93103448  | 5 | 7 | 5 | 98    | 7.44  | 81  | 5 |
| D3DU01     | Transmembr   | 7.15990453  | 1 | 1 | 1 | 47.5  | 6.65  | 70  | 1 |
| AOA087X0M4 | Kanadaptin   | 9.16442049  | 3 | 3 | 3 | 82.8  | 5.1   | 49  | 3 |
| Q9Y3E8     | CGI-150 prc  | 10.3174603  | 4 | 4 | 4 | 55    | 8.7   | 40  | 4 |
| E7ENX8     | Uncharacter  | 4.50771056  | 3 | 5 | 3 | 92.9  | 7.24  | 61  | 3 |
| A6H8Y5     | Nibrin OS=   | 6.36604775  | 4 | 4 | 3 | 84.9  | 7.06  | 101 | 4 |
| P78346     | Ribonuclea   | 18.6567164  | 4 | 4 | 4 | 29.3  | 8.91  | 52  | 4 |
| P49643     | DNA primase  | 5.10805501  | 2 | 2 | 2 | 58.8  | 7.91  | 131 | 2 |
| P48507     | Glutamate--  | 15.6934307  | 3 | 3 | 3 | 30.7  | 6.02  | 71  | 3 |
| Q96IZO     | PRKC apopt   | 8.23529412  | 2 | 2 | 2 | 36.5  | 5.41  | 99  | 2 |
| P68036     | Ubiquitin-c  | 33.7662338  | 3 | 4 | 2 | 17.9  | 8.51  | 69  | 3 |
| AOA140T9T7 | Antigen pe   | 4.20792079  | 3 | 4 | 3 | 87.1  | 8.02  | 81  | 3 |
| Q13564     | NEDD8-activ  | 8.23970037  | 4 | 5 | 4 | 60.2  | 5.4   | 69  | 4 |
| Q8NHH9     | Atlastin-2   | 10.806175   | 4 | 4 | 4 | 66.2  | 5.48  | 81  | 4 |
| P82933     | 28S riboso   | 12.1212121  | 5 | 5 | 5 | 45.8  | 9.51  | 100 | 5 |
| P31937     | 3-hydroxyis  | 12.5        | 2 | 3 | 2 | 35.3  | 8.13  | 74  | 2 |
| Q13405     | 39S riboso   | 24.6987952  | 4 | 4 | 4 | 19.2  | 9.45  | 95  | 4 |
| O75152     | Zinc finger  | 7.90123457  | 4 | 4 | 4 | 89.1  | 8.37  | 108 | 4 |
| AOA024RAF7 | Endothelin   | 8.57142857  | 5 | 5 | 5 | 87.1  | 5.88  | 68  | 5 |
| A8KA19     | cDNA FLJ75   | 4.36590437  | 3 | 3 | 3 | 109.8 | 5.39  | 55  | 3 |
| J3KQJ1     | Sulfatase-n  | 17.1875     | 4 | 4 | 4 | 35.9  | 9.19  | 87  | 4 |
| Q99543     | DnaJ homol   | 12.5603865  | 6 | 6 | 6 | 72    | 8.7   | 66  | 6 |
| P00374     | Dihydrofol   | 19.2513369  | 2 | 2 | 2 | 21.4  | 7.42  | 54  | 2 |
| Q9Y3B2     | Exosome con  | 19.4871795  | 3 | 4 | 3 | 21.4  | 8.24  | 66  | 3 |
| Q4GON4     | NAD kinase   | 12.8959276  | 4 | 4 | 4 | 49.4  | 8.18  | 82  | 4 |
| AOA0A0MTC1 | E3 ubiquiti  | 0.93226788  | 3 | 3 | 3 | 596.1 | 6.42  | 50  | 3 |
| Q9NUQ3     | Gamma-taxi   | 12.3106061  | 5 | 7 | 4 | 60.5  | 7.52  | 22  | 5 |
| P57772     | Selenocyste  | 8.38926174  | 4 | 4 | 4 | 65.3  | 8.35  | 60  | 4 |
| P10620     | Microsomal   | 12.9032258  | 3 | 4 | 3 | 17.6  | 9.39  | 42  | 3 |
| O15160     | DNA-direct   | 8.95953757  | 2 | 2 | 2 | 39.2  | 5.5   | 81  | 2 |
| P27338     | Amine oxide  | 7.88461538  | 4 | 5 | 4 | 58.7  | 7.5   | 90  | 4 |
| Q14165     | Malectin O   | 11.9863014  | 3 | 5 | 3 | 32.2  | 5.41  | 142 | 3 |
| Q9NXH9     | tRNA (guani  | 10.3186646  | 6 | 6 | 6 | 72.2  | 7.64  | 67  | 6 |
| B4DEF8     | cDNA FLJ61   | 113.0699088 | 3 | 4 | 3 | 37.8  | 9.13  | 34  | 3 |
| Q8TCT9     | Minor hist   | 8.22281167  | 2 | 3 | 2 | 41.5  | 6.43  | 51  | 2 |
| P10253     | Lysosomal    | 3.04621849  | 3 | 3 | 3 | 105.3 | 6     | 72  | 3 |
| HOYJ75     | Serine/thre  | 7.95660036  | 3 | 3 | 1 | 64    | 6.74  | 88  | 3 |
| AOA024RD36 | Ribosomal    | 13.7254902  | 3 | 5 | 3 | 29.7  | 10.52 | 73  | 3 |
| J3KNF8     | Cytochrome   | 22.6666667  | 1 | 1 | 1 | 16.7  | 4.97  | 62  | 1 |
| Q9NVP1     | ATP-depende  | 6.41791045  | 4 | 4 | 4 | 75.4  | 9.5   | 62  | 4 |
| A8K8F6     | cDNA FLJ78   | 11.4845938  | 3 | 3 | 3 | 41.4  | 9.06  | 66  | 3 |
| Q96EE3     | Nucleoporin  | 13.6111111  | 4 | 4 | 4 | 39.6  | 8.09  | 62  | 4 |
| Q5T1Z8     | Pumilio hon  | 4.98366013  | 5 | 5 | 5 | 130   | 6.9   | 88  | 5 |
| B3KVV6     | cDNA FLJ43   | 2.78884462  | 3 | 3 | 3 | 145.4 | 7.61  | 67  | 3 |
| P51116     | Fragile X n  | 6.68647845  | 4 | 4 | 3 | 74.2  | 6.23  | 72  | 4 |
| HOY9X1     | Translatior  | 14.0495868  | 4 | 4 | 4 | 27.7  | 9.57  | 60  | 4 |
| HOUI06     | Cytochrome   | 21.7391304  | 3 | 3 | 3 | 12.8  | 9.13  | 59  | 3 |
| O95983     | Methyl-CpG-  | 13.7457045  | 3 | 3 | 3 | 32.8  | 5.34  | 86  | 3 |

|            |             |              |   |   |   |       |       |     |   |
|------------|-------------|--------------|---|---|---|-------|-------|-----|---|
| Q59E89     | DnaJ (Hsp4  | 12.7906977   | 3 | 3 | 3 | 38.6  | 8.66  | 83  | 3 |
| Q86T12     | Dipeptidyl  | 5.44611819   | 3 | 4 | 3 | 98.2  | 6.46  | 59  | 3 |
| Q8NCA5     | Protein FAI | 7.89980732   | 4 | 4 | 3 | 55.4  | 9.03  | 100 | 4 |
| AOA0S2Z5E9 | CWF19-like  | 5.94795539   | 2 | 2 | 2 | 60.6  | 7.24  | 88  | 2 |
| Q59GY0     | Apolipoprot | 6.13207547   | 1 | 2 | 1 | 25.2  | 8.57  | 80  | 1 |
| AOA024RD11 | Protein phc | 6.64451827   | 3 | 3 | 1 | 69.9  | 8.13  | 87  | 3 |
| E9PR17     | CD59 glyco  | 25.3846154   | 3 | 4 | 3 | 14.5  | 7.77  | 56  | 3 |
| Q4LE43     | Phosphoino  | 2.76203966   | 3 | 4 | 3 | 161.2 | 7.18  | 35  | 3 |
| AOA024R9D9 | Transcripti | 36.6336634   | 3 | 4 | 3 | 11.5  | 9.33  | 73  | 3 |
| AOA0AOMSG2 | Four and a  | 17.4683544   | 4 | 4 | 4 | 44.8  | 8.06  | 51  | 4 |
| V9HWJ1     | Glutathione | 5.907173     | 2 | 2 | 2 | 52.4  | 5.92  | 121 | 2 |
| A8K4G7     | cDNA FLJ78  | 8.78378378   | 3 | 4 | 2 | 49.2  | 6.76  | 36  | 3 |
| Q9GZU8     | Protein FAI | 16.9291339   | 4 | 5 | 4 | 28.9  | 5.45  | 48  | 4 |
| Q9H5Q4     | Dimethylac  | 7.07070707   | 2 | 3 | 2 | 45.3  | 9.19  | 41  | 2 |
| U6FSN9     | Tyrosine-p  | 5.18407213   | 4 | 4 | 4 | 150.4 | 6.29  | 35  | 4 |
| Q6PL18     | ATPase fami | 2.44604317   | 3 | 3 | 3 | 158.5 | 6.32  | 81  | 3 |
| P41236     | Protein phc | 15.6097561   | 3 | 4 | 3 | 23    | 4.74  | 96  | 3 |
| G8JLH6     | Tetraspanir | 20.1754386   | 3 | 3 | 3 | 25.4  | 6.52  | 91  | 3 |
| B2R713     | cDNA, FLJ9  | 6.68485675   | 4 | 4 | 4 | 81.7  | 7.97  | 134 | 4 |
| Q15043     | Zinc transp | 6.70731707   | 2 | 2 | 2 | 54.2  | 5.33  | 82  | 2 |
| D6W5Y5     | Cold induci | 13.4680135   | 2 | 2 | 2 | 31.9  | 9.61  | 70  | 2 |
| P18077     | 60S riboso  | 26.3636364   | 4 | 8 | 4 | 12.5  | 11.06 | 35  | 4 |
| Q6IBS0     | Twinfilin-  | 10.0286533   | 2 | 2 | 2 | 39.5  | 6.84  | 40  | 2 |
| O43765     | Small glut  | 15.6549521   | 4 | 4 | 4 | 34    | 4.87  | 75  | 4 |
| Q9H993     | Protein-gl  | 5.89569161   | 2 | 5 | 2 | 51.1  | 5.76  | 74  | 2 |
| Q9Y4E8     | Ubiquitin   | 4.48521916   | 4 | 4 | 4 | 112.3 | 5.22  | 98  | 4 |
| Q9NW64     | Pre-mRNA-s  | 11.6666667   | 4 | 4 | 4 | 46.9  | 8.54  | 30  | 4 |
| P78316     | Nucleolar   | 15.01750292  | 3 | 3 | 3 | 97.6  | 7.58  | 65  | 3 |
| Q9P015     | 39S riboso  | 16.8918919   | 4 | 5 | 4 | 33.4  | 10.01 | 42  | 4 |
| P49770     | Translatio  | 17.9487179   | 5 | 5 | 5 | 39    | 6.16  | 67  | 5 |
| R9S3C3     | p14ARF/p1   | 6125.2941176 | 3 | 3 | 1 | 18.5  | 11.68 | 92  | 3 |
| Q9UBR2     | Cathepsin   | 10.5610561   | 3 | 4 | 3 | 33.8  | 7.11  | 60  | 3 |
| P53801     | Pituitary   | 116.6666667  | 2 | 3 | 2 | 20.3  | 8.79  | 60  | 2 |
| Q9BYD6     | 39S riboso  | 20.6153846   | 5 | 6 | 5 | 36.9  | 8.78  | 69  | 5 |
| Q3KQU3     | MAP7 domai  | 5.58858502   | 4 | 4 | 3 | 92.8  | 10.11 | 39  | 4 |
| Q9GHS1     | Serine/thre | 22.4913495   | 5 | 6 | 5 | 32    | 8.68  | 93  | 5 |
| O75348     | V-type prot | 22.8813559   | 2 | 2 | 2 | 13.7  | 8.79  | 102 | 2 |
| Q14554     | Protein di  | 10.5973025   | 4 | 4 | 4 | 59.6  | 7.91  | 50  | 4 |
| Q8NEY8     | Periphilin- | 7.20524017   | 3 | 4 | 3 | 52.7  | 9.11  | 44  | 3 |
| O60220     | Mitochondri | 41.2371134   | 2 | 2 | 2 | 11    | 5.16  | 48  | 2 |
| B3KPC7     | Actin-relat | 28.7581699   | 3 | 3 | 3 | 17    | 6.02  | 48  | 3 |
| P11234     | Ras-relate  | 17.4757282   | 3 | 3 | 2 | 23.4  | 6.62  | 75  | 3 |
| B2RBL3     | Thymidine   | 18.71369295  | 3 | 3 | 3 | 49.9  | 5.53  | 63  | 3 |
| AOA024R371 | PRA1 family | 13.8297872   | 2 | 4 | 2 | 21.6  | 9.77  | 108 | 2 |
| AOA068F7M9 | FH1/FH2 don | 2.60504202   | 2 | 2 | 2 | 129.2 | 6.37  | 88  | 2 |
| V9GYM8     | Rho guanin  | 5.62560621   | 5 | 5 | 5 | 116   | 7.37  | 73  | 5 |
| B2R8N1     | cDNA, FLJ9  | 16.7464115   | 2 | 2 | 2 | 23.2  | 5.38  | 76  | 2 |
| Q9BTX1     | Nucleoporin | 7.86350148   | 4 | 4 | 4 | 76.3  | 9.09  | 43  | 4 |
| Q8TDJ5     | Tyrosine-p  | 7.09838107   | 4 | 6 | 4 | 88.6  | 6.33  | 60  | 4 |
| P41208     | Centrin-2   | (15.1162791  | 2 | 2 | 2 | 19.7  | 5     | 104 | 2 |
| AOA024RC67 | Protein reg | 11.2903226   | 4 | 6 | 4 | 71.6  | 6.57  | 94  | 4 |
| D3DPK5     | SH3 domain  | 11.2840467   | 2 | 4 | 2 | 26.8  | 8.38  | 87  | 2 |
| Q8WYP5     | Protein EL  | 2.69196823   | 3 | 3 | 3 | 252.3 | 6.6   | 112 | 3 |
| O60826     | Coiled-coil | 4.14673046   | 2 | 3 | 2 | 70.7  | 6.74  | 86  | 2 |
| AOA0G2JK44 | Bromodomai  | 4.784689     | 3 | 3 | 2 | 92    | 9.16  | 39  | 3 |
| DOEKE5     | Peptidylpr  | 19.8813056   | 4 | 4 | 4 | 38.5  | 6.84  | 0   | 4 |
| Q9Y2R4     | Probable A  | 17.01168614  | 3 | 3 | 3 | 67.5  | 9.67  | 75  | 3 |
| O95295     | SNARE-assoc | 24.2647059   | 2 | 2 | 2 | 14.9  | 9.31  | 101 | 2 |
| Q6NUK7     | Tyrosine-p  | 6.52920962   | 4 | 4 | 2 | 65.8  | 9.09  | 85  | 4 |
| Q96G23     | Ceramide s  | 7.89473684   | 2 | 4 | 2 | 44.8  | 8.98  | 21  | 2 |
| AOA140VJL8 | Testicular  | 14.8809524   | 4 | 4 | 4 | 36.7  | 7.91  | 68  | 4 |
| J9JIE6     | Calcium lo  | 15.4811715   | 3 | 3 | 3 | 27.1  | 10.26 | 82  | 3 |
| AOA024R8Z9 | Aspartyl-t  | 5.73643411   | 3 | 3 | 3 | 73.5  | 8.02  | 84  | 3 |
| V9GZ56     | U6 snRNA-a  | 14.7058824   | 3 | 4 | 3 | 25.7  | 10.15 | 15  | 3 |
| O95168     | NADH dehyd  | 31.0077519   | 3 | 3 | 3 | 15.2  | 9.85  | 59  | 3 |
| Q9NR33     | DNA polymer | 30.7692308   | 3 | 3 | 3 | 12.2  | 4.92  | 55  | 3 |
| Q9BVI4     | Nucleolar   | 6.58914729   | 2 | 2 | 2 | 58.4  | 7.49  | 60  | 2 |
| Q9P0J0     | NADH dehyd  | 22.9166667   | 3 | 3 | 3 | 16.7  | 8.43  | 42  | 3 |
| O60885     | Bromodomai  | 2.71659325   | 3 | 3 | 1 | 152.1 | 9.19  | 33  | 3 |
| AOA024RB62 | tRNA (guani | 7.64119601   | 2 | 3 | 2 | 34.1  | 7.9   | 102 | 2 |
| Q9H568     | Actin-like  | 7.37704918   | 2 | 3 | 2 | 41.3  | 6.14  | 53  | 2 |
| Q6Y1H2     | Very-long   | 11.8110236   | 2 | 3 | 2 | 28.4  | 9.55  | 37  | 2 |
| Q9H583     | HEAT repeat | 2.6119403    | 4 | 4 | 4 | 242.2 | 6.54  | 55  | 4 |

|            |                        |   |   |   |       |       |     |   |
|------------|------------------------|---|---|---|-------|-------|-----|---|
| Q9H8Y5     | Ankyrin ref6.88705234  | 3 | 3 | 3 | 80.9  | 8.41  | 72  | 3 |
| Q9H0B6     | Kinesin lig6.59163987  | 3 | 4 | 1 | 68.9  | 7.15  | 66  | 3 |
| O00625     | Pirin OS=Hc13.7931034  | 2 | 2 | 2 | 32.1  | 6.92  | 34  | 2 |
| Q9Y2A7     | Nck-associ2.30496454   | 2 | 2 | 2 | 128.7 | 6.62  | 109 | 2 |
| Q9UNI6     | Dual specif 10         | 2 | 2 | 2 | 37.7  | 6.84  | 44  | 2 |
| AOA0S2Z381 | Adenosine c12.6721763  | 4 | 4 | 4 | 40.7  | 5.95  | 63  | 4 |
| AOA0AOMRK6 | Metaxin 1, 10.0858369  | 3 | 3 | 3 | 51.4  | 9.79  | 48  | 3 |
| Q8TCJ2     | Dolichyl-di4.84261501  | 5 | 6 | 4 | 93.6  | 8.91  | 56  | 5 |
| P82921     | 28S riboson37.9310345  | 3 | 3 | 3 | 10.7  | 10.21 | 100 | 3 |
| A6NDU8     | UPF0600 prc11.5646259  | 2 | 2 | 2 | 33.6  | 5.26  | 43  | 2 |
| P07108     | Acyl-CoA-bi56.3218391  | 3 | 3 | 3 | 10    | 6.57  | 84  | 3 |
| Q86WV7     | CCDC43 prot15.8590308  | 3 | 4 | 3 | 25.5  | 4.92  | 65  | 3 |
| B2R7G6     | cDNA, FLJ9:17.0790514  | 5 | 5 | 3 | 56.9  | 8.02  | 50  | 5 |
| P60602     | Reactive o34.1772152   | 2 | 3 | 2 | 8.2   | 9.33  | 119 | 2 |
| AOA024R094 | Poly(A) bir11.1111111  | 2 | 3 | 2 | 35    | 4.79  | 74  | 2 |
| Q9BVJ8     | HEXA protei8.55745721  | 2 | 2 | 2 | 47.1  | 5     | 40  | 2 |
| Q9Y2W2     | WW domain-t6.24024961  | 3 | 4 | 3 | 70    | 8.38  | 65  | 3 |
| X6R4W8     | BUB3-inter2.81690141   | 2 | 4 | 2 | 52.6  | 8.47  | 36  | 2 |
| Q9BSE5     | Agmatinase,17.0454545  | 3 | 3 | 3 | 37.6  | 7.59  | 46  | 3 |
| F5GXJ1     | NADH dehyd12.2881356   | 3 | 3 | 3 | 25.4  | 9.89  | 102 | 3 |
| Q08379     | Golgin sub14.29141717  | 4 | 5 | 4 | 113   | 5.02  | 75  | 4 |
| P19388     | DNA-direct16.1904762   | 3 | 3 | 3 | 24.5  | 5.95  | 50  | 3 |
| AOA024RC37 | Uncharacter11.5384615  | 3 | 3 | 3 | 35.7  | 7.55  | 99  | 3 |
| AOA087WV05 | Uncharacter48.1818182  | 4 | 4 | 4 | 12.7  | 6.02  | 53  | 4 |
| O60271     | C-Jun-aminc3.40651022  | 4 | 4 | 4 | 146.1 | 5.15  | 63  | 4 |
| Q9Y2S6     | Translatior 21.875     | 2 | 4 | 2 | 7.1   | 9.99  | 50  | 2 |
| Q59HG1     | Chromosome-3.88663968  | 4 | 4 | 4 | 140.3 | 6.27  | 99  | 4 |
| P05026     | Sodium/pot13.2013201   | 4 | 5 | 4 | 35    | 8.53  | 28  | 4 |
| K7ELG9     | Protein LSM14.3478261  | 2 | 2 | 2 | 24.9  | 7.42  | 62  | 2 |
| X6R2S6     | Signal pept10.0591716  | 1 | 2 | 1 | 18.3  | 8.72  | 74  | 1 |
| Q9BU89     | Deoxyhypusi7.61589404  | 1 | 1 | 1 | 32.9  | 4.83  | 59  | 1 |
| Q15018     | BRISC comp16.02409639  | 3 | 3 | 3 | 46.9  | 6.21  | 109 | 3 |
| P28288     | ATP-binding8.19423369  | 5 | 5 | 4 | 75.4  | 9.36  | 61  | 5 |
| Q5J7U2     | TGF beta-ir11.1538462  | 2 | 3 | 2 | 30    | 10.27 | 67  | 2 |
| E5RG17     | Putative de9.31677019  | 2 | 2 | 2 | 36.4  | 7.65  | 66  | 2 |
| Q14181     | DNA polymer7.35785953  | 4 | 4 | 4 | 65.9  | 5.24  | 56  | 4 |
| Q9GZY8     | Mitochondri19.5906433  | 3 | 3 | 3 | 38.4  | 8.95  | 0   | 3 |
| Q9NR12     | PDZ and LIM10.5032823  | 3 | 4 | 3 | 49.8  | 8.41  | 41  | 3 |
| Q9NXG2     | THUMP domai15.2974504  | 4 | 4 | 4 | 39.3  | 7.88  | 46  | 4 |
| Q9UH65     | Switch-assc7.69230769  | 5 | 5 | 5 | 69    | 5.87  | 48  | 5 |
| F8WCF6     | Actin-relat16.5745856  | 3 | 4 | 3 | 21    | 8.76  | 69  | 3 |
| Q9HA77     | Probable cy5.14184397  | 2 | 3 | 2 | 62.2  | 8.34  | 72  | 2 |
| Q96EL3     | 39S riboson24.1071429  | 3 | 3 | 3 | 12.1  | 8.76  | 71  | 3 |
| Q8ND56     | Protein LSM9.93520518  | 3 | 4 | 3 | 50.5  | 9.52  | 36  | 3 |
| P42566     | Epidermal f3.23660714  | 1 | 1 | 1 | 98.6  | 4.64  | 79  | 1 |
| AOA024QYXO | Emopamil bi 12.173913  | 2 | 5 | 2 | 26.3  | 7.9   | 59  | 2 |
| Q9H6T3     | RNA polymer6.91729323  | 4 | 5 | 4 | 75.7  | 6.84  | 101 | 4 |
| P18031     | Tyrosine-pi 7.5862069  | 2 | 3 | 2 | 49.9  | 6.27  | 39  | 2 |
| K7ERV3     | Thymidine t21.7228464  | 3 | 4 | 3 | 28.6  | 8.56  | 39  | 3 |
| X6RLX0     | ELKS/Rab6-j 2.5        | 2 | 2 | 2 | 128.4 | 5.97  | 105 | 2 |
| Q96T76     | MMS19 nucle5.82524272  | 4 | 4 | 4 | 113.2 | 6.35  | 27  | 4 |
| Q9HD33     | 39S riboson 9.6        | 2 | 3 | 2 | 29.4  | 10.37 | 45  | 2 |
| Q9BPX3     | Condensin c2.85714286  | 2 | 2 | 2 | 114.3 | 5.59  | 48  | 2 |
| B7ZLW0     | LPP proteir7.18954248  | 4 | 5 | 4 | 65.7  | 7.37  | 37  | 4 |
| Q9BSC4     | Nucleolar p9.59302326  | 4 | 5 | 4 | 80.3  | 8.46  | 64  | 4 |
| Q53GW1     | Vesicle tra 11.682243  | 5 | 6 | 5 | 72.3  | 6.38  | 26  | 5 |
| Q6NUM9     | All-trans-r4.59016393  | 2 | 4 | 2 | 66.8  | 8.28  | 38  | 2 |
| P32322     | Pyrroline-f10.6583072  | 3 | 3 | 2 | 33.3  | 7.61  | 88  | 3 |
| Q9H0C8     | Integrin-lil11.2244898 | 4 | 4 | 4 | 42.9  | 7.09  | 58  | 4 |
| B4DZF8     | Serine/thre18.9839572  | 3 | 3 | 3 | 42.1  | 5.8   | 0   | 3 |
| F5GXR3     | Parathyrosi13.4615385  | 2 | 4 | 2 | 12.1  | 11    | 165 | 2 |
| Q9UJ83     | 2-hydroxyac7.78546713  | 3 | 3 | 3 | 63.7  | 7.36  | 0   | 3 |
| Q9UN37     | Vacuolar pi10.9839817  | 3 | 4 | 2 | 48.9  | 7.8   | 37  | 3 |
| Q08170     | Serine/argi9.31174089  | 4 | 4 | 2 | 56.6  | 11.52 | 75  | 4 |
| B2R6N9     | cDNA, FLJ9:17.1328671  | 3 | 4 | 3 | 32.2  | 4.49  | 69  | 3 |
| P62942     | Peptidyl-pi 25         | 2 | 3 | 2 | 11.9  | 8.16  | 183 | 2 |
| Q9BQC3     | 2-(3-amino-8.38445808  | 2 | 2 | 2 | 52.1  | 5.53  | 87  | 2 |
| AOA0U1RQMO | Uncharacter35.3448276  | 2 | 3 | 2 | 12.7  | 10.24 | 51  | 2 |
| A8K7Z3     | cDNA FLJ77:5.82639715  | 4 | 4 | 4 | 95.9  | 5.07  | 63  | 4 |
| Q6NTG0     | SLC9A3R2 pi8.87096774  | 3 | 3 | 3 | 40.6  | 8.13  | 75  | 3 |
| Q12888     | Tumor suppi3.04259635  | 4 | 4 | 4 | 213.4 | 4.7   | 79  | 4 |
| O60925     | Prefoldin :22.9508197  | 3 | 3 | 3 | 14.2  | 6.81  | 85  | 3 |
| O43491     | Band 4.1-l13.78109453  | 3 | 3 | 3 | 112.5 | 5.44  | 0   | 3 |

|            |                         |   |   |   |       |       |     |   |
|------------|-------------------------|---|---|---|-------|-------|-----|---|
| Q5SQP8     | C-terminal-6.23781676   | 3 | 3 | 2 | 56.1  | 6.96  | 75  | 3 |
| Q8N556     | Actin filan6.98630137   | 4 | 5 | 4 | 80.7  | 8.68  | 98  | 4 |
| Q5TB52     | 3'-phospho7.32899023    | 4 | 4 | 3 | 69.5  | 8.03  | 45  | 4 |
| Q16822     | Phosphoenol 10          | 4 | 4 | 4 | 70.7  | 7.62  | 39  | 4 |
| Q15075     | Early endo4.67753366    | 5 | 5 | 5 | 162.4 | 5.68  | 39  | 5 |
| C9JA08     | 60S ribosom8.69565217   | 3 | 3 | 3 | 60.1  | 6.62  | 75  | 3 |
| A2A2Q9     | Protein AAF5.52763819   | 2 | 2 | 2 | 45    | 7.46  | 96  | 2 |
| V9HW09     | Epididymis 10.8571429   | 4 | 4 | 4 | 39.6  | 9.7   | 57  | 4 |
| Q9HCU5     | Prolactin 11.2709832    | 3 | 3 | 3 | 45.4  | 7.88  | 39  | 3 |
| Q14432     | cGMP-inhibi2.97984224   | 2 | 2 | 2 | 124.9 | 6     | 68  | 2 |
| Q96CN7     | Isochorism8.38926174    | 2 | 2 | 2 | 32.2  | 7.39  | 68  | 2 |
| Q8N4V1     | Membrane m8.3206107     | 1 | 1 | 1 | 14.7  | 9.16  | 95  | 1 |
| Q53G19     | Mitochondri 10.9375     | 1 | 2 | 1 | 20.6  | 9.91  | 0   | 1 |
| AOA140VKA9 | Testis seci9.83606557   | 2 | 3 | 2 | 25.8  | 7.37  | 70  | 2 |
| AOAOS2Z3W7 | Nucleotide 10.8247423   | 1 | 2 | 1 | 21.4  | 5.66  | 37  | 1 |
| Q9NQ88     | Fructose-2,22.5925926   | 3 | 3 | 3 | 30    | 7.69  | 37  | 3 |
| Q9UBI1     | COMM domair 18.974359   | 2 | 2 | 2 | 22.1  | 5.99  | 38  | 2 |
| Q13601     | KRR1 small 8.66141732   | 3 | 3 | 3 | 43.6  | 9.77  | 62  | 3 |
| AOA0A0MSV9 | Tapasin OS6.34920635    | 3 | 3 | 3 | 53.9  | 7.08  | 79  | 3 |
| Q14257     | Reticulocal5.67823344   | 1 | 1 | 1 | 36.9  | 4.4   | 71  | 1 |
| P19784     | Casein kin12.2857143    | 3 | 3 | 2 | 41.2  | 8.56  | 90  | 3 |
| Q9H6Z4     | Ran-binding 5.99647266  | 2 | 2 | 2 | 60.2  | 4.78  | 52  | 2 |
| B4DKM0     | cDNA FLJ518 10.4        | 3 | 3 | 3 | 41.6  | 9.58  | 53  | 3 |
| Q9BZX2     | Uridine-cyt24.9042146   | 4 | 4 | 4 | 29.3  | 6.7   | 41  | 4 |
| B4DX46     | cDNA FLJ526 5.26315789  | 2 | 3 | 2 | 47.3  | 5.05  | 79  | 2 |
| P48634     | Protein PRF2.96708391   | 3 | 3 | 3 | 228.7 | 9.45  | 44  | 3 |
| Q96ER9     | Coiled-coi19.48905109   | 2 | 2 | 2 | 45.8  | 8.19  | 76  | 2 |
| AOA024R136 | Rac GTPase 5.37974684   | 3 | 3 | 3 | 71    | 8.88  | 66  | 3 |
| B2RD09     | cDNA, FLJ96 7.51072961  | 3 | 3 | 3 | 50.4  | 9.03  | 55  | 3 |
| AOA024R9Y6 | Guanine nuc5.67010309   | 2 | 2 | 2 | 65.5  | 8.44  | 41  | 2 |
| Q9Y520     | Protein PRF2.24447514   | 5 | 5 | 5 | 316.7 | 9.13  | 45  | 5 |
| Q9NXF1     | Testis-expt 4.73627557  | 3 | 3 | 3 | 105.6 | 9.36  | 57  | 3 |
| Q5T0W9     | Protein FA4.25321464    | 3 | 3 | 3 | 114.7 | 8.97  | 60  | 3 |
| AOAOS2Z4R4 | Hepatocyte 5.14800515   | 4 | 4 | 4 | 86.1  | 6.16  | 51  | 4 |
| AOA024R8J2 | Protein tyr14.4508671   | 2 | 2 | 2 | 19.8  | 8.97  | 41  | 2 |
| B4DPZ4     | cDNA FLJ60710.4803493   | 3 | 3 | 3 | 52.7  | 6.7   | 36  | 3 |
| Q4G176     | Acyl-CoA s3.47222222    | 1 | 2 | 1 | 64.1  | 8.37  | 40  | 1 |
| Q59HH7     | X-ray repai9.11901082   | 4 | 5 | 4 | 71    | 6.04  | 54  | 4 |
| P49916     | DNA ligase 4.95540139   | 4 | 4 | 4 | 112.8 | 9.01  | 36  | 4 |
| P14735     | Insulin-deg 4.41609421  | 4 | 4 | 4 | 117.9 | 6.61  | 37  | 4 |
| Q53H82     | Endoribonuc 18.05555556 | 4 | 4 | 4 | 32.8  | 6.8   | 37  | 4 |
| Q5VTL8     | Pre-mRNA-s12.0879121    | 3 | 4 | 3 | 64.4  | 10.54 | 51  | 3 |
| O15031     | Plexin-B2 (3.80848749   | 5 | 5 | 5 | 205   | 6.24  | 32  | 5 |
| AOA024RDJ1 | DC2 proteir8.05369128   | 1 | 2 | 1 | 16.8  | 9.13  | 75  | 1 |
| Q53R19     | Arp2/3 comp8.33333333   | 2 | 2 | 2 | 34.3  | 7.36  | 55  | 2 |
| Q9BW27     | Nuclear poi3.96341463   | 2 | 2 | 2 | 75    | 5.55  | 115 | 2 |
| B2R673     | Dihydrolipc 13.1736527  | 5 | 5 | 5 | 54    | 8.76  | 65  | 5 |
| Q8WUA2     | Peptidyl-p6.09756098    | 2 | 2 | 2 | 57.2  | 5.92  | 102 | 2 |
| A8K2G0     | Secretory c10.6508876   | 2 | 2 | 2 | 37.8  | 7.11  | 77  | 2 |
| B2RDP6     | cDNA, FLJ96 7.62331839  | 3 | 3 | 3 | 49.4  | 4.92  | 76  | 3 |
| Q8WTS6     | Histone-lyc 7.65027322  | 2 | 2 | 2 | 40.7  | 4.63  | 75  | 2 |
| Q96L92     | Sorting ne7.57855823    | 4 | 4 | 4 | 61.2  | 6.49  | 74  | 4 |
| Q9Y679     | Ancient ubi5.67226891   | 2 | 3 | 2 | 53    | 8.09  | 38  | 2 |
| AOA0X1KG71 | Negative e18.12101911   | 4 | 4 | 4 | 70    | 6.04  | 40  | 4 |
| AOA024R880 | Cyclin-depe 10.483871   | 4 | 4 | 2 | 42.8  | 8.79  | 90  | 4 |
| O43617     | Trafficking 17.22222222 | 3 | 3 | 3 | 20.3  | 4.96  | 82  | 3 |
| Q5VW32     | BR01 domair8.27250608   | 3 | 3 | 3 | 46.4  | 7.65  | 60  | 3 |
| AOA0A0MTH3 | Integrin-li 4.9689441   | 2 | 2 | 2 | 54.6  | 7.97  | 95  | 2 |
| Q1ED39     | Lysine-ric8.29694323    | 3 | 4 | 3 | 51.6  | 9.86  | 27  | 3 |
| Q9NZZ3     | Charged mul20.0913242   | 3 | 6 | 3 | 24.6  | 4.83  | 94  | 3 |
| Q9NPJ6     | Mediator of 10          | 2 | 2 | 2 | 29.7  | 5.1   | 88  | 2 |
| Q9NUQ6     | SPATS2-like2.15053763   | 1 | 2 | 1 | 61.7  | 9.64  | 50  | 1 |
| P61020     | Ras-relatec 16.744186   | 3 | 3 | 2 | 23.7  | 8.13  | 27  | 3 |
| B2RDI5     | cDNA, FLJ96 3.22128852  | 2 | 2 | 2 | 81.8  | 5.54  | 93  | 2 |
| V9HW45     | Epididymis 21.8390805   | 3 | 6 | 3 | 30    | 7.06  | 0   | 3 |
| Q0VDF9     | Heat shock 5.50098232   | 1 | 1 | 1 | 54.8  | 5.59  | 63  | 1 |
| B3KP47     | cDNA FLJ31119.6319018   | 3 | 4 | 3 | 19.6  | 9.86  | 56  | 3 |
| B4DIS3     | Dpy-30-like18.33333333  | 2 | 3 | 2 | 13.9  | 7.5   | 76  | 2 |
| Q92481     | Transcripti4.34782609   | 1 | 1 | 1 | 50.4  | 8.24  | 76  | 1 |
| AOA024QZW3 | RAN binding 3.56652949  | 2 | 2 | 2 | 77.8  | 6.79  | 92  | 2 |
| Q59GM9     | Alpha-1,4 f3.58381503   | 3 | 3 | 2 | 98.8  | 6.96  | 37  | 3 |
| A0MZ66     | Shootin-1 (3.80348653   | 2 | 2 | 2 | 71.6  | 5.33  | 83  | 2 |
| Q96AY3     | Peptidyl-pr 7.21649485  | 4 | 4 | 4 | 64.2  | 5.62  | 36  | 4 |



|            |                       |             |   |    |   |       |       |     |   |
|------------|-----------------------|-------------|---|----|---|-------|-------|-----|---|
| Q9Y5P6     | Mannose-1- $\pi$      | 5           | 1 | 1  | 1 | 39.8  | 6.61  | 113 | 1 |
| Q658N3     | Down-regulat          | 15.3409091  | 2 | 3  | 2 | 19.4  | 4.75  | 122 | 2 |
| Q15382     | GTP-binding           | 13.0434783  | 2 | 2  | 2 | 20.5  | 5.92  | 63  | 2 |
| D6RER5     | Septin-11 (9.72222222 |             | 3 | 4  | 2 | 49.8  | 6.68  | 61  | 3 |
| E9PF49     | NADH dehydr           | 13.1221719  | 2 | 2  | 2 | 26.6  | 8.87  | 38  | 2 |
| AOA0AOMRL7 | Caspase-7 (11.5979381 |             | 4 | 4  | 4 | 43.7  | 9.31  | 58  | 4 |
| P17275     | Transcripti           | 19.8847262  | 4 | 4  | 4 | 35.9  | 9.22  | 62  | 4 |
| Q96B49     | Mitochondri           | 56.7567568  | 2 | 2  | 2 | 8     | 4.89  | 47  | 2 |
| Q5TDF0     | Cancer-rela           | 11.8421053  | 2 | 3  | 2 | 25.1  | 9.42  | 63  | 2 |
| O95372     | Acyl-protei           | 14.2857143  | 2 | 2  | 2 | 24.7  | 7.23  | 49  | 2 |
| Q03468     | DNA excisic           | 2.9470864   | 3 | 3  | 3 | 168.3 | 8.09  | 78  | 3 |
| AOA0S2Z497 | Peroxisomal           | 8.02675585  | 1 | 1  | 1 | 32.8  | 4.34  | 62  | 1 |
| Q9HC35     | Echinoderm            | 4.68909276  | 3 | 3  | 3 | 108.8 | 6.4   | 85  | 3 |
| AOA0D9SF50 | Lys-63-spec           | 11.3564669  | 3 | 3  | 3 | 36.1  | 6.2   | 0   | 3 |
| Q9BV38     | WD repeat-c           | 5.55555556  | 2 | 2  | 2 | 47.4  | 6.7   | 68  | 2 |
| Q8N5M9     | Protein jag           | 6.55737705  | 1 | 2  | 1 | 21.1  | 9.73  | 99  | 1 |
| O75844     | CAAX prenyl           | 7.78947368  | 5 | 6  | 5 | 54.8  | 7.49  | 92  | 5 |
| Q9COK1     | Zinc trans            | 4.7826087   | 1 | 3  | 1 | 49.6  | 6.09  | 0   | 1 |
| AOA0AOMRM8 | Unconventic           | 2.79329609  | 3 | 3  | 3 | 144.9 | 8.56  | 47  | 3 |
| Q9BUI4     | DNA-directe           | 3.1835206   | 1 | 2  | 1 | 60.6  | 7.31  | 63  | 1 |
| Q9Y4X5     | E3 ubiquiti           | 4.84739677  | 2 | 2  | 2 | 64.1  | 5.08  | 49  | 2 |
| Q9BRR6     | ADP-depend            | 5.83501006  | 2 | 2  | 2 | 54.1  | 6.2   | 89  | 2 |
| O60508     | Pre-mRNA-p            | 6.39032815  | 3 | 3  | 3 | 65.5  | 7.06  | 37  | 3 |
| Q92541     | RNA polymer           | 5.35211268  | 2 | 2  | 2 | 80.3  | 8.15  | 55  | 2 |
| Q8IY71     | MRPS17 prot           | 20.4225352  | 1 | 1  | 1 | 15.7  | 9.85  | 55  | 1 |
| Q96AT9     | Ribulose-pl           | 15.7894737  | 3 | 3  | 3 | 24.9  | 5.58  | 56  | 3 |
| AOA024R648 | Translocase           | 16.8539326  | 1 | 2  | 1 | 10.4  | 7.21  | 65  | 1 |
| A8K5D4     | Myelin prot           | 9.66542751  | 2 | 3  | 2 | 29.1  | 8.72  | 113 | 2 |
| AOA075B6F9 | Nitric oxid           | 12.5        | 3 | 3  | 3 | 33.4  | 8.72  | 45  | 3 |
| AOA087WW40 | Endophilin            | -8.12182741 | 3 | 4  | 3 | 44.2  | 6.44  | 41  | 3 |
| B2R932     | cDNA, FLJ9            | 15.1351351  | 2 | 2  | 2 | 18.9  | 4.82  | 89  | 2 |
| Q2MIJ6     | Oxidase (C)           | 5.84677419  | 3 | 4  | 3 | 55.3  | 9.69  | 31  | 3 |
| AOA0C4MVT1 | Bax proteir           | 6.37254902  | 1 | 1  | 1 | 22.6  | 5.31  | 87  | 1 |
| P26885     | Peptidyl-p            | 9.15492958  | 2 | 3  | 2 | 15.6  | 9.13  | 56  | 2 |
| Q13907     | Isopentenyl           | 19.8237885  | 3 | 3  | 3 | 26.3  | 6.34  | 45  | 3 |
| P67812     | Signal pep            | 13.9664804  | 2 | 2  | 2 | 20.6  | 9.48  | 66  | 2 |
| P42126     | Enoyl-CoA             | 9.27152318  | 2 | 2  | 2 | 32.8  | 8.54  | 68  | 2 |
| Q8WUW1     | Protein BRJ           | 28          | 2 | 2  | 2 | 8.7   | 5.45  | 80  | 2 |
| P46108     | Adapter mol           | 12.8289474  | 3 | 3  | 3 | 33.8  | 5.55  | 39  | 3 |
| Q9HCS7     | Pre-mRNA-s            | 2.92397661  | 2 | 2  | 2 | 99.9  | 6.23  | 60  | 2 |
| O60499     | Syntaxin-1            | (10.4417671 | 2 | 2  | 2 | 28.1  | 4.89  | 69  | 2 |
| AOA024R074 | Synaptobrev           | 11.5384615  | 2 | 2  | 2 | 30.2  | 8.37  | 77  | 2 |
| Q9HOL4     | Cleavage st           | 5.19480519  | 3 | 3  | 1 | 64.4  | 7.25  | 91  | 3 |
| O14949     | Cytochrome            | 47.5609756  | 4 | 5  | 4 | 9.9   | 10.08 | 55  | 4 |
| Q8N7H5     | RNA polymer           | 7.7212806   | 2 | 2  | 2 | 59.9  | 4.63  | 58  | 2 |
| Q9P2R3     | Rabankyrin            | -3.42172797 | 3 | 4  | 2 | 128.3 | 6.1   | 53  | 3 |
| Q9BTD8     | RNA-binding           | 3.54166667  | 1 | 1  | 1 | 50.4  | 9.63  | 81  | 1 |
| Q68CQ4     | Digestive c           | 5.55555556  | 3 | 4  | 3 | 87    | 5.88  | 15  | 3 |
| O94903     | Proline syr           | 12          | 3 | 3  | 3 | 30.3  | 7.5   | 73  | 3 |
| P35610     | Sterol O-ac           | 7.45454545  | 2 | 2  | 2 | 64.7  | 8.94  | 0   | 2 |
| AOA1B0GUS4 | HCG1789360            | 24.025974   | 2 | 3  | 1 | 17.9  | 7.84  | 69  | 2 |
| P36639     | 7,8-dihydr            | 16.751269   | 2 | 3  | 2 | 22.5  | 5.27  | 27  | 2 |
| Q6NXR4     | TEL02-inter           | 3.1496063   | 1 | 1  | 1 | 56.9  | 7.09  | 102 | 1 |
| O15511     | Actin-relat           | 17.8807947  | 2 | 2  | 2 | 16.3  | 5.67  | 86  | 2 |
| P15954     | Cytochrome            | 28.5714286  | 1 | 2  | 1 | 7.2   | 10.27 | 46  | 1 |
| AOA096LPC5 | WASH compl            | 4.69798658  | 4 | 4  | 4 | 147.1 | 4.81  | 46  | 4 |
| E5RFR7     | Tumor prote           | 26.1261261  | 2 | 2  | 1 | 12.4  | 4.68  | 62  | 2 |
| Q13425     | Beta-2-synt           | 6.66666667  | 3 | 3  | 3 | 57.9  | 8.82  | 92  | 3 |
| P37235     | Hippocalcir           | 10.3626943  | 2 | 2  | 2 | 22.3  | 5.35  | 78  | 2 |
| AOA0U1RRM6 | Protein enz           | 7.60598504  | 4 | 4  | 4 | 87.3  | 7.77  | 0   | 4 |
| P36954     | DNA-directe           | 18.4        | 1 | 1  | 1 | 14.5  | 5.14  | 73  | 1 |
| Q96F86     | Enhancer o            | 10.2362205  | 3 | 3  | 3 | 56    | 7.11  | 41  | 3 |
| Q9H910     | Hematologic           | 24.7368421  | 5 | 10 | 5 | 20.1  | 9.26  | 42  | 5 |
| AOA140VJR2 | Testicular            | 7.30223124  | 2 | 2  | 2 | 54.5  | 6     | 59  | 2 |
| A4DOW0     | LSM8 homol            | c27.0833333 | 2 | 2  | 2 | 10.4  | 4.48  | 58  | 2 |
| Q9NPF4     | Probable tf           | 9.85074627  | 2 | 2  | 2 | 36.4  | 6.35  | 49  | 2 |
| Q68D38     | Putative ur           | 13.4920635  | 2 | 2  | 1 | 28    | 5.8   | 71  | 2 |
| F1JVV5     | EWSR1/ATF1            | 6.1452514   | 2 | 2  | 1 | 57    | 8.57  | 55  | 2 |
| AOA024QZR3 | Protein pell          | 11.4285714  | 4 | 4  | 4 | 43.4  | 6.34  | 54  | 4 |
| O75223     | Gamma-glut            | 25.5319149  | 4 | 4  | 4 | 21    | 5.14  | 38  | 4 |
| B3KRQ2     | cDNA FLJ34            | c3.84951881 | 3 | 3  | 3 | 130.9 | 6.87  | 40  | 3 |
| AOA024RDV9 | Spastic par           | 5.25525526  | 2 | 3  | 2 | 72.8  | 5.91  | 0   | 2 |
| Q8N543     | Prolyl 3-hy           | 7.74907749  | 4 | 4  | 4 | 63.2  | 5.11  | 69  | 4 |

|            |                       |   |   |   |       |       |     |   |
|------------|-----------------------|---|---|---|-------|-------|-----|---|
| A0A024R4S0 | Chromatin n17.1171171 | 3 | 3 | 3 | 25.1  | 5.97  | 89  | 3 |
| Q8NDC0     | MAPK-inter:6.93877551 | 1 | 1 | 1 | 24.3  | 5.62  | 71  | 1 |
| Q96T51     | RUN and FYV 4.0960452 | 2 | 2 | 2 | 79.8  | 5.74  | 77  | 2 |
| POC7P4     | Putative c3.18727915  | 4 | 4 | 4 | 30.8  | 8.87  | 92  | 4 |
| Q9BV44     | THUMP domai7.69230769 | 2 | 2 | 2 | 57    | 6.37  | 52  | 2 |
| A0A087X2H1 | E3 ubiquiti1.9510329  | 4 | 4 | 4 | 289.5 | 5.43  | 41  | 4 |
| Q6NXE6     | Armadillo r8.38323353 | 3 | 3 | 3 | 54.1  | 6.24  | 56  | 3 |
| O43805     | Sjoegren s22.6890756  | 2 | 2 | 2 | 13.6  | 5.38  | 66  | 2 |
| C9J7E5     | Transportir3.55276907 | 3 | 3 | 3 | 108   | 5.71  | 87  | 3 |
| Q15418     | Ribosomal r8.70748299 | 5 | 6 | 4 | 82.7  | 7.83  | 45  | 5 |
| Q9BT22     | Chitobiosyl2.80172414 | 1 | 2 | 1 | 52.5  | 7.23  | 37  | 1 |
| P57737     | Coronin-7 (3.24324324 | 2 | 2 | 2 | 100.5 | 5.8   | 66  | 2 |
| LOR588     | Alternative22.6415094 | 3 | 4 | 3 | 18.4  | 11.3  | 36  | 3 |
| A5YKK6     | CCR4-NOT t1.76767677  | 4 | 4 | 4 | 266.8 | 7.11  | 44  | 4 |
| A0A024QZW2 | Nucleolar r14.3968872 | 4 | 4 | 4 | 29.4  | 9.67  | 44  | 4 |
| A8K940     | cDNA FLJ77c3.21057602 | 3 | 3 | 3 | 112.2 | 7.3   | 62  | 3 |
| Q5TH30     | NDRG family7.98969072 | 3 | 3 | 3 | 42.8  | 5.33  | 59  | 3 |
| Q9BQ95     | Evolutionai4.64037123 | 1 | 1 | 1 | 49.1  | 6.29  | 95  | 1 |
| B2R9Y2     | cDNA, FLJ9c8.60215054 | 2 | 2 | 2 | 66.3  | 8.97  | 52  | 2 |
| A0A087WSV8 | Nucleobindi6.66666667 | 3 | 3 | 2 | 50.2  | 5.12  | 69  | 3 |
| Q969N2     | GPI transan7.09342561 | 4 | 4 | 4 | 65.7  | 8.38  | 58  | 4 |
| J3QRU1     | Tyrosine-p6.93430657  | 4 | 4 | 2 | 61.3  | 6.57  | 67  | 4 |
| Q9Y5J9     | Mitochondri24.0963855 | 2 | 2 | 2 | 9.3   | 5.12  | 89  | 2 |
| B2R9K5     | cDNA, FLJ9c9.26640927 | 1 | 1 | 1 | 29.9  | 10.17 | 50  | 1 |
| Q9H5V9     | UPF0428 prc11.2612613 | 2 | 2 | 2 | 25.6  | 8.73  | 60  | 2 |
| P41214     | Eukaryotic 8.21917808 | 3 | 3 | 3 | 64.7  | 7.65  | 0   | 3 |
| E5RJR5     | S-phase kir 36.809816 | 3 | 3 | 3 | 18.7  | 4.7   | 41  | 3 |
| Q49A26     | Putative o3.8716094   | 3 | 3 | 3 | 60.5  | 9.17  | 57  | 3 |
| Q5T6F2     | Ubiquitin-c3.84271671 | 3 | 3 | 3 | 117   | 7.34  | 77  | 3 |
| Q9UJA5     | tRNA (adeni9.85915493 | 3 | 3 | 3 | 55.8  | 7.55  | 34  | 3 |
| O95229     | ZW10 inter:9.02527076 | 2 | 2 | 2 | 31.3  | 5.15  | 45  | 2 |
| Q9H2P9     | Diphthine n10.5263158 | 2 | 2 | 2 | 31.6  | 5.31  | 29  | 2 |
| Q9NX55     | Huntingtin-34.8837209 | 2 | 2 | 2 | 14.7  | 4.93  | 46  | 2 |
| Q96BR5     | Cytochrome 16.017316  | 3 | 3 | 3 | 25.7  | 6.02  | 44  | 3 |
| Q969E8     | Pre-rRNA-p10.9947644  | 2 | 2 | 2 | 20.9  | 4.39  | 72  | 2 |
| A0A0AGYZ17 | Ubiquitinyl4.63499421 | 3 | 3 | 1 | 97.3  | 5.53  | 42  | 3 |
| P61970     | Nuclear tr:17.3228346 | 2 | 2 | 2 | 14.5  | 5.38  | 57  | 2 |
| Q9BV68     | E3 ubiquiti3.98773006 | 1 | 2 | 1 | 35.6  | 5.72  | 56  | 1 |
| Q7Z4Q2     | HEAT repea16.17647059 | 3 | 3 | 3 | 74.5  | 5.11  | 29  | 3 |
| A0A024R5Q8 | CTD (Carbo5.36480687  | 2 | 2 | 2 | 53    | 6.4   | 80  | 2 |
| Q6LAP8     | Mitochondri9.43396226 | 3 | 4 | 3 | 34.8  | 9.89  | 33  | 3 |
| Q9UPN7     | Serine/thrc4.19977299 | 2 | 3 | 2 | 96.7  | 4.55  | 42  | 2 |
| B1AKJ6     | Oxysterol-t 4.4534413 | 3 | 3 | 3 | 83.7  | 6.48  | 71  | 3 |
| Q13616     | Cullin-1 O3.35051546  | 3 | 4 | 3 | 89.6  | 8     | 39  | 3 |
| A8MU27     | Small ubiq18.3673469  | 3 | 4 | 1 | 16.9  | 9.67  | 131 | 3 |
| Q9HBH0     | Rho-relatec13.2701422 | 2 | 2 | 2 | 23.6  | 8.65  | 43  | 2 |
| Q6ZVX7     | F-box only 10.9090909 | 2 | 2 | 2 | 30.8  | 6.62  | 78  | 2 |
| Q96IX5     | Up-regulatc27.5862069 | 2 | 2 | 2 | 6.5   | 9.76  | 75  | 2 |
| A0A024RE04 | Uncharacter9.05077263 | 3 | 3 | 3 | 52.1  | 8.47  | 42  | 3 |
| G3V4T6     | Maleylacet17.0506912  | 2 | 2 | 2 | 24.2  | 7.18  | 0   | 2 |
| Q8N983     | 39S riboson13.4883721 | 2 | 2 | 2 | 23.4  | 8.65  | 44  | 2 |
| B3KQA0     | cDNA FLJ90c18.8976378 | 1 | 1 | 1 | 14.5  | 4.64  | 53  | 1 |
| Q9H3P7     | Golgi resic3.03030303 | 1 | 1 | 1 | 60.6  | 5.06  | 81  | 1 |
| Q9NRV9     | Heme-bindir25.3968254 | 2 | 2 | 2 | 21.1  | 5.8   | 40  | 2 |
| Q9BXV9     | Uncharacter 18        | 1 | 1 | 1 | 10.9  | 4.27  | 70  | 1 |
| Q9BY43     | Charged mull1.2612613 | 2 | 2 | 2 | 25.1  | 4.7   | 68  | 2 |
| Q9UNE7     | E3 ubiquiti11.8811881 | 3 | 3 | 3 | 34.8  | 5.87  | 29  | 3 |
| B2R6Z3     | cDNA, FLJ9c6.94789082 | 2 | 2 | 2 | 45.8  | 9.39  | 44  | 2 |
| P36405     | ADP-ribosyl17.5824176 | 3 | 3 | 3 | 20.4  | 7.24  | 44  | 3 |
| O43752     | Syntaxin-6 9.80392157 | 1 | 1 | 1 | 29.2  | 4.93  | 41  | 1 |
| Q96N66     | Lysophosphc 6.3559322 | 3 | 6 | 3 | 52.7  | 8.97  | 75  | 3 |
| Q9Y2P8     | RNA 3'-tern9.38337802 | 3 | 3 | 3 | 40.8  | 9.26  | 49  | 3 |
| O60427     | Fatty acid 5.40540541 | 2 | 2 | 2 | 51.9  | 8.87  | 54  | 2 |
| O43653     | Prostate st22.7642276 | 2 | 2 | 2 | 12.9  | 5.29  | 70  | 2 |
| O15042     | U2 snRNP-a:4.76190476 | 3 | 3 | 3 | 118.2 | 8.47  | 46  | 3 |
| A0A024R8V6 | Ubiquitin :3.73998219 | 3 | 3 | 3 | 122.8 | 9.7   | 69  | 3 |
| Q5VV42     | Threonylca4.49050086  | 1 | 1 | 1 | 65.1  | 7.46  | 38  | 1 |
| Q9U1L1     | Short coilc11.3207547 | 1 | 1 | 1 | 18    | 8.85  | 73  | 1 |
| P23368     | NAD-dependc11.3013699 | 3 | 3 | 3 | 65.4  | 7.61  | 14  | 3 |
| Q9COD9     | Ethanolamir4.53400504 | 1 | 1 | 1 | 45.2  | 6.6   | 63  | 1 |
| Q9BZF9     | Uveal autoz1.97740113 | 3 | 3 | 2 | 162.4 | 7.03  | 75  | 3 |
| Q9HCC0     | Methylcrotc5.15097691 | 2 | 2 | 2 | 61.3  | 7.68  | 0   | 2 |
| B5BTZ8     | Small nuclc14.2222222 | 3 | 3 | 3 | 25.4  | 9.72  | 82  | 3 |

|            |                       |             |   |   |   |       |       |    |   |
|------------|-----------------------|-------------|---|---|---|-------|-------|----|---|
| Q96IJ6     | Mannose-1- $\pi$      | 9.28571429  | 3 | 3 | 3 | 46.3  | 7.21  | 27 | 3 |
| P62875     | DNA-directe           | 16.4179104  | 1 | 2 | 1 | 7.6   | 7.77  | 0  | 1 |
| A6NMNO     | Phosphoryle           | 1.20967742  | 1 | 1 | 1 | 139   | 6.18  | 70 | 1 |
| O75530     | Polycomb pi           | 7.93650794  | 3 | 3 | 3 | 50.2  | 7.03  | 24 | 3 |
| Q9NX46     | Poly(ADP-ri           | 7.71349862  | 2 | 2 | 2 | 38.9  | 5.07  | 68 | 2 |
| Q96CU9     | FAD-depende           | 7.40740741  | 2 | 2 | 2 | 53.8  | 7.78  | 41 | 2 |
| Q13363     | C-terminal-           | 7.95454545  | 4 | 4 | 2 | 47.5  | 6.77  | 67 | 4 |
| Q9BUR5     | MICOS compl           | 15.6565657  | 2 | 3 | 2 | 22.3  | 9.13  | 74 | 2 |
| Q96KA5     | Cleft lip $\epsilon$  | 5.20446097  | 2 | 2 | 2 | 62.2  | 8.56  | 66 | 2 |
| Q9NX24     | H/ACA ribor           | 12.4183007  | 1 | 1 | 1 | 17.2  | 8.22  | 84 | 1 |
| D9ZGF8     | Rho-associ            | 1.77252585  | 3 | 3 | 1 | 158.1 | 5.94  | 36 | 3 |
| Q9NZT2     | Opioid grow           | 8.41949778  | 4 | 4 | 4 | 73.3  | 4.84  | 42 | 4 |
| B2RDG9     | cDNA, FLJ9            | 5.03597122  | 2 | 2 | 2 | 46.2  | 7.62  | 75 | 2 |
| Q5H9R7     | Serine/thre           | 3.32187858  | 2 | 2 | 2 | 97.6  | 4.6   | 27 | 2 |
| Q9Y606     | tRNA pseud            | 5.15222482  | 2 | 2 | 2 | 47.4  | 8.41  | 65 | 2 |
| B4DM85     | Kinesin-lil           | 4.16666667  | 3 | 3 | 2 | 84    | 6.47  | 69 | 3 |
| Q9NPD8     | Ubiquitin-c           | 16.2436548  | 3 | 3 | 3 | 22.5  | 7.99  | 55 | 3 |
| Q8N523     | Tuftelin-ir           | 3.22580645  | 2 | 2 | 2 | 96.7  | 5.67  | 90 | 2 |
| O60671     | Cell cycle            | 8.5106383   | 1 | 1 | 1 | 31.8  | 4.83  | 65 | 1 |
| E7EMK3     | Flotillin-2           | 5.38302277  | 2 | 3 | 2 | 53.1  | 5.24  | 0  | 2 |
| Q9NP72     | Ras-relate            | 14.5631068  | 2 | 2 | 2 | 23    | 5.24  | 0  | 2 |
| A0A140VJC8 | Testicular            | 3.63636364  | 2 | 2 | 2 | 86.9  | 4.82  | 39 | 2 |
| X5DQZ7     | Glutathione           | 63.0434783  | 1 | 1 | 1 | 4.6   | 9.14  | 34 | 1 |
| Q541A5     | Ubiquitin             | 17.81758958 | 2 | 3 | 2 | 34.5  | 6.7   | 51 | 2 |
| P62304     | Small nucle           | 29.3478261  | 2 | 2 | 2 | 10.8  | 9.44  | 60 | 2 |
| Q9Y294     | Histone ch            | 16.6666667  | 2 | 4 | 2 | 23    | 4.41  | 31 | 2 |
| X6R8A1     | Carboxypep            | 4.01606426  | 1 | 1 | 1 | 56.2  | 6.61  | 84 | 1 |
| H3BQK9     | Microtubul            | 0.79030558  | 4 | 4 | 3 | 860.5 | 5.38  | 72 | 4 |
| Q8NAV1     | Pre-mRNA-s            | 6.08974359  | 2 | 3 | 2 | 37.5  | 9.96  | 53 | 2 |
| P63172     | Dynein lig            | 30.0884956  | 2 | 2 | 2 | 12.4  | 5.08  | 45 | 2 |
| A0A0C4DFX9 | Negative el           | 4.45269017  | 2 | 2 | 2 | 58.5  | 9.26  | 65 | 2 |
| B4DTK7     | cDNA FLJ6             | 3.58239509  | 2 | 2 | 2 | 108.9 | 8.44  | 0  | 2 |
| Q9Y320     | Thioredoxir           | 13.1756757  | 2 | 2 | 2 | 34    | 8.69  | 49 | 2 |
| P49247     | Ribose-5-p            | 7.7170418   | 2 | 2 | 2 | 33.2  | 8.54  | 48 | 2 |
| P54105     | Methylsom             | 10.5485232  | 2 | 3 | 2 | 26.2  | 4.11  | 61 | 2 |
| Q96DB5     | Regulator c           | 11.7834395  | 3 | 3 | 3 | 35.8  | 8.5   | 38 | 3 |
| Q92520     | Protein FA            | 12.3348018  | 2 | 2 | 2 | 24.7  | 8.29  | 45 | 2 |
| Q9Y315     | Deoxyribos            | 6.91823899  | 2 | 2 | 2 | 35.2  | 8.94  | 68 | 2 |
| A4D1V4     | Mitochondri           | 10.6382979  | 2 | 3 | 2 | 21.4  | 9.73  | 43 | 2 |
| B3KWH9     | Elongation            | 6.35451505  | 2 | 3 | 2 | 35.3  | 9.41  | 72 | 2 |
| B2RB47     | AMP deamin            | 3.86803185  | 3 | 3 | 3 | 100.7 | 6.93  | 49 | 3 |
| B5BU81     | YKT6 v-SNA            | 7.57575758  | 1 | 1 | 1 | 22.4  | 6.92  | 52 | 1 |
| O95071     | E3 ubiquiti           | 1.07181136  | 2 | 2 | 2 | 309.2 | 5.85  | 58 | 2 |
| A0A0B4J203 | Uncharacter           | 2.23792697  | 1 | 1 | 1 | 94.6  | 4.96  | 70 | 1 |
| Q9H936     | Mitochondri           | 7.73993808  | 2 | 2 | 2 | 34.4  | 9.29  | 44 | 2 |
| Q9Y4H2     | Insulin rec           | 2.98953662  | 3 | 3 | 3 | 137.2 | 8.65  | 41 | 3 |
| A0A0S2Z3D0 | Carbonic ar           | 6.53594771  | 2 | 2 | 2 | 49.7  | 4.72  | 67 | 2 |
| HOY886     | NADH dehyd            | 7.2815534   | 1 | 1 | 1 | 23.5  | 9.6   | 72 | 1 |
| Q9GZR2     | RNA exonuc            | 110.4265403 | 4 | 4 | 4 | 46.6  | 9.77  | 0  | 4 |
| Q59ED5     | Tetraspanir           | 13.6842105  | 2 | 3 | 2 | 31.7  | 8.37  | 0  | 2 |
| C9JJ19     | 28S riboson           | 20.4444444  | 3 | 3 | 3 | 26.3  | 9.89  | 43 | 3 |
| A0A0S2Z5U6 | Pyrroline- $\epsilon$ | 13.4375     | 3 | 3 | 2 | 33.6  | 7.77  | 66 | 3 |
| P29992     | Guanine nuc           | 6.1281337   | 2 | 2 | 1 | 42.1  | 5.69  | 44 | 2 |
| B2RAQ9     | Proteasome            | 12.6353791  | 3 | 4 | 3 | 29.9  | 7.68  | 79 | 3 |
| Q9UKL0     | REST corep            | 3.29896907  | 1 | 1 | 1 | 53.3  | 7.03  | 57 | 1 |
| Q9NRW7     | Vacuolar pi           | 4.21052632  | 2 | 2 | 2 | 65    | 8.24  | 48 | 2 |
| A0A024R7L2 | HSPC142 pr            | 10.3343465  | 2 | 2 | 2 | 36.5  | 4.64  | 46 | 2 |
| P62330     | ADP-ribosyl           | 20.5714286  | 2 | 2 | 2 | 20.1  | 8.95  | 36 | 2 |
| P11047     | Laminin su            | 3.35612181  | 4 | 4 | 4 | 177.5 | 5.12  | 43 | 4 |
| Q5TBB1     | Ribonuclea            | 10.8974359  | 2 | 2 | 2 | 35.1  | 9.13  | 33 | 2 |
| A0AVT1     | Ubiquitin-1           | 2.28136882  | 2 | 2 | 2 | 117.9 | 6.14  | 0  | 2 |
| Q8N2F6     | Armadillo             | 17.87172012 | 2 | 2 | 2 | 37.5  | 6.61  | 64 | 2 |
| E7EPT4     | NADH dehyd            | 12.6984127  | 2 | 2 | 2 | 27.9  | 8     | 0  | 2 |
| C9JF46     | LIM and ser           | 13.6363636  | 1 | 1 | 1 | 19.9  | 6.96  | 45 | 1 |
| O00291     | Huntingtin            | -2.98939248 | 3 | 3 | 3 | 116.1 | 5.3   | 40 | 3 |
| O14773     | Tripeptidyl           | 11.722913   | 3 | 3 | 3 | 61.2  | 6.48  | 0  | 3 |
| Q5SRD1     | Putative mi           | 6.61478599  | 1 | 1 | 1 | 28    | 9.39  | 62 | 1 |
| P15529     | Membrane c            | 5.86734694  | 2 | 2 | 2 | 43.7  | 6.74  | 49 | 2 |
| Q96PU8     | Protein que           | 7.03812317  | 2 | 2 | 2 | 37.6  | 8.56  | 47 | 2 |
| Q86X76     | Nitrilase             | 16.42201835 | 2 | 2 | 2 | 35.9  | 7.74  | 60 | 2 |
| P62273     | 40S riboson           | 19.6428571  | 1 | 2 | 1 | 6.7   | 10.13 | 57 | 1 |
| Q5VT66     | Mitochondri           | 5.04451039  | 1 | 1 | 1 | 37.5  | 8.88  | 65 | 1 |
| P15328     | Folate rece           | 7.39299611  | 1 | 1 | 1 | 29.8  | 7.97  | 44 | 1 |

|            |             |             |   |    |   |       |       |     |   |
|------------|-------------|-------------|---|----|---|-------|-------|-----|---|
| Q96EK6     | Glucosamin  | 14.1304348  | 2 | 2  | 2 | 20.7  | 7.99  | 72  | 2 |
| Q724X2     | Neuronal p  | 23.4177215  | 2 | 2  | 2 | 17.9  | 5.43  | 0   | 2 |
| A0A024R539 | Uncharacter | 6.41025641  | 2 | 2  | 2 | 35.1  | 5.35  | 59  | 2 |
| Q9Y3D0     | Mitotic sp  | 13.4969325  | 1 | 1  | 1 | 17.7  | 5.19  | 77  | 1 |
| A0A068F658 | Glucosylcer | 6.90298507  | 4 | 4  | 4 | 59.7  | 7.61  | 65  | 4 |
| Q8LZ83     | Aldehyde de | 2.86783042  | 2 | 2  | 2 | 85.1  | 6.79  | 72  | 2 |
| A0A087WWF6 | DNA polymer | 7.14285714  | 2 | 2  | 2 | 54.7  | 5.95  | 0   | 2 |
| O43719     | HIV Tat-sp  | 3.44370861  | 2 | 2  | 2 | 85.8  | 4.4   | 0   | 2 |
| Q15050     | Ribosome bi | 8.49315068  | 3 | 3  | 3 | 41.2  | 10.7  | 55  | 3 |
| O14617     | AP-3 compl  | 3.12228968  | 3 | 3  | 3 | 130.1 | 8.48  | 0   | 3 |
| A0A024R210 | Interferon  | 16.8        | 1 | 2  | 1 | 13.9  | 7.93  | 0   | 1 |
| Q9BW72     | HIG1 domai  | 27.3584906  | 1 | 1  | 1 | 11.5  | 10.2  | 0   | 1 |
| B3KQ21     | cDNA FLJ32  | 3.85259631  | 2 | 2  | 2 | 70.2  | 7.46  | 68  | 2 |
| Q8N3D4     | EH domain-t | 2.69205515  | 3 | 3  | 3 | 161.8 | 4.83  | 46  | 3 |
| Q92733     | Proline-ric | 6.10997963  | 2 | 2  | 2 | 52.4  | 5.1   | 50  | 2 |
| B2R7T6     | cDNA, FLJ9  | 3.11111111  | 1 | 1  | 1 | 49.9  | 9.06  | 64  | 1 |
| Q9H9P8     | L-2-hydroxy | 4.31965443  | 2 | 2  | 2 | 50.3  | 8.15  | 46  | 2 |
| Q9BUP0     | EF-hand do  | 12.5523013  | 3 | 3  | 1 | 26.9  | 5.39  | 43  | 3 |
| Q8N9T8     | Protein KR1 | 5.97439545  | 3 | 3  | 3 | 82.5  | 5.14  | 0   | 3 |
| Q14789     | Golgin sub  | 0.98189629  | 2 | 2  | 2 | 375.8 | 5     | 37  | 2 |
| Q9Y639     | Neuroplasti | 6.7839196   | 2 | 2  | 2 | 44.4  | 7.99  | 28  | 2 |
| Q13643     | Four and a  | 12.1428571  | 2 | 2  | 2 | 31.2  | 6.2   | 39  | 2 |
| Q13427     | Peptidyl-p  | 3.97877984  | 2 | 2  | 2 | 88.6  | 10.29 | 64  | 2 |
| Q92615     | La-related  | 3.9295393   | 2 | 2  | 1 | 80.5  | 6.92  | 39  | 2 |
| Q13887     | Krueppel-li | 8.09628009  | 2 | 2  | 2 | 50.8  | 8.6   | 35  | 2 |
| Q8NBN7     | Retinol def | 7.25075529  | 1 | 1  | 1 | 35.9  | 8.1   | 41  | 1 |
| Q9H330     | Transmembr  | 3.95170143  | 3 | 3  | 3 | 100.9 | 8.87  | 55  | 3 |
| Q96S66     | Chloride cl | 7.62250454  | 3 | 4  | 3 | 62    | 5.55  | 48  | 3 |
| Q7Z422     | SUZ domain  | -13.8157895 | 1 | 2  | 1 | 17    | 8.95  | 0   | 1 |
| A8K489     | cDNA FLJ76  | 111.3636364 | 3 | 3  | 3 | 44.2  | 5.25  | 56  | 3 |
| O95235     | Kinesin-lil | 1.57303371  | 1 | 1  | 1 | 100.2 | 6.92  | 88  | 1 |
| Q9NUG6     | p53 and DN  | 12.7819549  | 1 | 1  | 1 | 15.5  | 6.06  | 65  | 1 |
| G5E9A6     | Ubiquitin c | 4.23913043  | 1 | 1  | 1 | 105   | 5.33  | 0   | 1 |
| J3KPZ4     | Nuclear nuc | 10          | 2 | 4  | 2 | 20.1  | 8.06  | 47  | 2 |
| Q9H871     | Protein RMI | 5.11508951  | 2 | 2  | 2 | 44    | 6.06  | 47  | 2 |
| Q70UQ0     | Inhibitor c | 9.71428571  | 3 | 3  | 3 | 39.3  | 9.17  | 42  | 3 |
| Q9H8Y8     | Golgi reas  | 7.52212389  | 2 | 2  | 2 | 47.1  | 4.82  | 34  | 2 |
| P60468     | Protein tr  | 27.0833333  | 2 | 3  | 2 | 10    | 11.56 | 72  | 2 |
| P84101     | Small EDRK  | -32.2033898 | 3 | 3  | 3 | 6.9   | 10.45 | 45  | 3 |
| E9PQY2     | Prefoldin   | 11.0294118  | 1 | 1  | 1 | 15.6  | 4.58  | 76  | 1 |
| O75629     | Protein CR  | 9.54545455  | 1 | 1  | 1 | 24.1  | 7.59  | 59  | 1 |
| P11182     | Lipoamide   | 4.97925311  | 2 | 2  | 2 | 53.5  | 8.51  | 50  | 2 |
| A0A024R2M7 | Oxidative-  | 9.86717268  | 4 | 4  | 4 | 58    | 6.43  | 56  | 4 |
| Q6UVK1     | Chondroitir | 1.11972438  | 2 | 2  | 2 | 250.4 | 5.47  | 103 | 2 |
| Q14155     | Rho guanin  | 2.49066002  | 1 | 1  | 1 | 90    | 7.09  | 69  | 1 |
| P33552     | Cyclin-dep  | 20.2531646  | 1 | 2  | 1 | 9.9   | 8.46  | 0   | 1 |
| Q9Y657     | Spindlin-1  | 8.77862595  | 2 | 2  | 2 | 29.6  | 6.96  | 57  | 2 |
| B2RAL9     | Dual speci  | 10.6770833  | 2 | 2  | 2 | 41.8  | 6.33  | 42  | 2 |
| Q96B36     | Proline-ric | 7.8125      | 2 | 2  | 2 | 27.4  | 4.75  | 54  | 2 |
| Q5QPA5     | 39S riboso  | 10.2661597  | 2 | 2  | 2 | 29.6  | 10.7  | 59  | 2 |
| Q15427     | Splicing f  | 3.30188679  | 1 | 1  | 1 | 44.4  | 8.56  | 81  | 1 |
| Q96R06     | Sperm-ass   | 2.01173512  | 2 | 2  | 2 | 134.3 | 5     | 54  | 2 |
| Q9UNN5     | FAS-associ  | 4.15384615  | 2 | 2  | 2 | 73.9  | 4.88  | 36  | 2 |
| Q9Y3A2     | Probable U  | 7.50988142  | 2 | 3  | 2 | 30.4  | 10.15 | 64  | 2 |
| Q9NP58     | ATP-binding | 2.85035629  | 1 | 1  | 1 | 93.8  | 8.48  | 58  | 1 |
| P85037     | Forkhead b  | 2.86493861  | 2 | 2  | 2 | 75.4  | 9.32  | 57  | 2 |
| O95470     | Sphingosin  | 2.64084507  | 1 | 1  | 1 | 63.5  | 9.16  | 75  | 1 |
| Q00534     | Cyclin-dep  | 7.05521472  | 2 | 2  | 1 | 36.9  | 6.46  | 35  | 2 |
| B4DZ29     | cDNA FLJ57  | 13.3333333  | 2 | 2  | 2 | 21.9  | 5.95  | 48  | 2 |
| P55081     | Microfibril | 11.1617312  | 3 | 3  | 3 | 51.9  | 4.98  | 39  | 3 |
| HOY5K5     | Endoplasmic | 8.0604534   | 3 | 3  | 3 | 44.6  | 6.47  | 19  | 3 |
| Q13084     | 39S riboso  | 12.890625   | 2 | 2  | 2 | 30.1  | 8.29  | 26  | 2 |
| O95989     | Diphosphoir | 18.0232558  | 2 | 2  | 2 | 19.5  | 6.34  | 46  | 2 |
| Q96BP3     | Peptidylpr  | 6.34674923  | 3 | 4  | 3 | 73.5  | 7.15  | 31  | 3 |
| Q8N335     | Glycerol-3  | -5.41310541 | 2 | 2  | 2 | 38.4  | 7.02  | 79  | 2 |
| Q15102     | Platelet-ac | 11.2554113  | 3 | 3  | 3 | 25.7  | 6.84  | 71  | 3 |
| O00461     | Golgi inte  | 4.31034483  | 2 | 3  | 2 | 81.8  | 4.77  | 0   | 2 |
| Q68E01     | Integrator  | 2.87631831  | 1 | 1  | 1 | 118   | 5.8   | 52  | 1 |
| Q5UIP0     | Telomere-a  | 1.33495146  | 2 | 2  | 2 | 274.3 | 5.52  | 67  | 2 |
| P06454     | Prothymosir | 12.6126126  | 1 | 12 | 1 | 12.2  | 3.78  | 433 | 1 |
| X6RAL5     | Histone de  | 22.6744186  | 4 | 4  | 4 | 19.5  | 9.8   | 66  | 4 |
| P30047     | GTP cyclohy | 19.047619   | 1 | 1  | 1 | 9.7   | 6.54  | 81  | 1 |
| G3V1L9     | Tight junct | 1.52714932  | 2 | 2  | 2 | 197.3 | 6.67  | 0   | 2 |

|            |                       |   |   |   |       |       |    |   |
|------------|-----------------------|---|---|---|-------|-------|----|---|
| B2RE40     | cDNA, FLJ965.31914894 | 1 | 2 | 1 | 31.5  | 4.59  | 19 | 1 |
| A0A024R5F7 | 7-dehydrochl          | 2 | 2 | 2 | 54.5  | 8.7   | 92 | 2 |
| P07858     | Cathepsin F           | 2 | 2 | 2 | 37.8  | 6.3   | 35 | 2 |
| MOQZR4     | Rho guanine           | 2 | 2 | 2 | 108.3 | 6.15  | 57 | 2 |
| AOA0S2Z5U7 | Diablo-like           | 1 | 2 | 1 | 27.1  | 5.9   | 64 | 1 |
| Q96JB5     | CDK5 regulat          | 3 | 3 | 3 | 56.9  | 4.75  | 60 | 3 |
| Q9NR09     | Baculoviral           | 2 | 2 | 2 | 529.9 | 6.05  | 32 | 2 |
| Q9Y2Z4     | Tyrosine--t           | 2 | 2 | 2 | 53.2  | 8.98  | 42 | 2 |
| P08047     | Transcripti           | 1 | 4 | 1 | 80.6  | 7.34  | 82 | 1 |
| Q9NQG5     | Regulation            | 2 | 2 | 2 | 36.9  | 5.97  | 51 | 2 |
| Q13206     | Probable A12          | 2 | 2 | 2 | 100.8 | 8.63  | 24 | 2 |
| Q8WWW5     | Probable tf           | 2 | 2 | 2 | 37.2  | 8.25  | 62 | 2 |
| Q9UKV8     | Protein ar            | 3 | 3 | 3 | 97.1  | 9.19  | 37 | 3 |
| Q14643     | Inositol 1,           | 2 | 2 | 1 | 313.7 | 6.04  | 66 | 2 |
| O14530     | Thioredoxin           | 2 | 2 | 2 | 26.5  | 5.88  | 46 | 2 |
| A0A0B4J1S4 | Selenoprot            | 1 | 1 | 1 | 18    | 5.03  | 48 | 1 |
| P82663     | 28S ribosom           | 2 | 2 | 2 | 20.1  | 8.82  | 39 | 2 |
| Q96J02     | E3 ubiquitin          | 2 | 2 | 2 | 102.7 | 6.3   | 32 | 2 |
| O75616     | GTPase Era,           | 1 | 1 | 1 | 48.3  | 8.84  | 67 | 1 |
| Q9NVM9     | Protein ast           | 2 | 2 | 2 | 80.2  | 6.7   | 57 | 2 |
| Q14691     | DNA replic            | 1 | 1 | 1 | 23    | 7.39  | 71 | 1 |
| Q5U5X0     | Complex III           | 2 | 2 | 2 | 11.9  | 9.66  | 0  | 2 |
| Q9Y6K9     | NF-kappa-B            | 1 | 1 | 1 | 48.2  | 5.71  | 0  | 1 |
| P42696     | RNA-binding           | 1 | 1 | 1 | 48.5  | 10.11 | 54 | 1 |
| Q5JTZ9     | Alanine--tf           | 3 | 3 | 3 | 107.3 | 6.27  | 50 | 3 |
| Q53LP3     | Ankyrin ref           | 3 | 3 | 3 | 55.6  | 7.03  | 35 | 3 |
| B2R4U3     | cDNA, FLJ913          | 2 | 2 | 2 | 19.6  | 7.37  | 36 | 2 |
| O75794     | Cell divisi           | 3 | 3 | 3 | 39.1  | 4.81  | 22 | 3 |
| Q9BSJ2     | Gamma-tubu            | 2 | 2 | 2 | 102.5 | 6.84  | 27 | 2 |
| B4DU42     | cDNA FLJ5614          | 3 | 3 | 3 | 71.8  | 7.3   | 51 | 3 |
| Q92665     | 28S ribosom           | 2 | 2 | 2 | 45.3  | 9.29  | 66 | 2 |
| Q9GZT8     | NIF3-like p           | 1 | 1 | 1 | 41.9  | 6.65  | 64 | 1 |
| Q9H8H0     | Nucleolar p           | 2 | 2 | 2 | 81.1  | 6.07  | 61 | 2 |
| F8VX04     | Sodium-cou            | 2 | 3 | 2 | 56.2  | 7.69  | 50 | 2 |
| Q00535     | Cyclin-depe           | 2 | 2 | 1 | 33.3  | 7.66  | 54 | 2 |
| Q9H3U1     | Protein unc           | 3 | 3 | 3 | 103   | 6.07  | 40 | 3 |
| A0A024QZC1 | CD2 antigen           | 2 | 2 | 2 | 37.6  | 4.61  | 51 | 2 |
| Q00653     | Nuclear fac           | 2 | 2 | 2 | 96.7  | 6.25  | 0  | 2 |
| A8K7G2     | cDNA FLJ755           | 1 | 1 | 1 | 48.8  | 9.96  | 62 | 1 |
| Q96T23     | Remodeling            | 3 | 3 | 3 | 163.7 | 5.01  | 22 | 3 |
| Q9BUL8     | Programmed            | 1 | 1 | 1 | 24.7  | 8.19  | 40 | 1 |
| Q9BRX8     | Redox-regul           | 2 | 2 | 2 | 25.7  | 8.84  | 23 | 2 |
| Q86TU7     | Histone-lys           | 2 | 2 | 2 | 67.2  | 5.96  | 35 | 2 |
| Q8IV08     | Phospholip            | 2 | 2 | 2 | 54.7  | 6.47  | 53 | 2 |
| Q6PGP7     | Tetratricop           | 2 | 2 | 2 | 175.4 | 7.53  | 24 | 2 |
| P51553     | Isocitrate            | 2 | 2 | 2 | 42.8  | 8.5   | 52 | 2 |
| B3KME2     | cDNA FLJ107           | 3 | 3 | 3 | 46.5  | 5.85  | 34 | 3 |
| A0A0C4DFL7 | Lanosterol            | 4 | 4 | 4 | 57.2  | 8.53  | 42 | 4 |
| A0A140VJMO | Testicular            | 2 | 2 | 2 | 116.5 | 6.77  | 47 | 2 |
| Q13724     | Mannosyl-ol           | 2 | 2 | 2 | 91.9  | 8.9   | 50 | 2 |
| Q8LZ73     | RNA pseudot           | 2 | 2 | 2 | 61.3  | 7.17  | 36 | 2 |
| P78330     | Phosphoseri           | 2 | 2 | 2 | 25    | 5.69  | 0  | 2 |
| Q9BUH6     | Protein PA            | 1 | 1 | 1 | 21.6  | 5.48  | 59 | 1 |
| B3KN49     | cDNA FLJ13            | 1 | 1 | 1 | 40.6  | 4.89  | 41 | 1 |
| Q96C86     | m7GpppX di            | 1 | 1 | 1 | 38.6  | 6.38  | 52 | 1 |
| Q9HCY8     | Protein S1            | 1 | 1 | 1 | 11.7  | 5.24  | 54 | 1 |
| O15357     | Phosphatid            | 3 | 3 | 3 | 138.5 | 6.54  | 75 | 3 |
| Q8N3C0     | Activating            | 2 | 2 | 2 | 251.3 | 7.09  | 46 | 2 |
| Q9BYT8     | Neurolysin,           | 3 | 3 | 3 | 80.6  | 6.64  | 38 | 3 |
| Q9NRL2     | Bromodomai            | 2 | 2 | 2 | 178.6 | 6.6   | 61 | 2 |
| P63272     | Transcripti           | 1 | 2 | 1 | 13.2  | 8.06  | 0  | 1 |
| B2RDG1     | Fatty acyl-           | 2 | 2 | 2 | 59.3  | 9.17  | 41 | 2 |
| Q6UWP7     | Lysocardiol           | 1 | 2 | 1 | 48.9  | 8.62  | 32 | 1 |
| H3BLV9     | SRSF protei           | 3 | 4 | 3 | 76    | 6.28  | 36 | 3 |
| Q99961     | Endophilin-           | 3 | 4 | 3 | 41.5  | 5.43  | 56 | 3 |
| Q9GZP9     | Derlin-2              | 1 | 1 | 1 | 27.5  | 7.28  | 0  | 1 |
| Q14692     | Ribosome bi           | 3 | 3 | 3 | 145.7 | 6.44  | 22 | 3 |
| X6RAY8     | 39S ribosom           | 1 | 1 | 1 | 39.6  | 10.59 | 0  | 1 |
| O60216     | Double-str            | 1 | 1 | 1 | 71.6  | 4.65  | 72 | 1 |
| A0A024R6R1 | SHC SH2-don           | 1 | 1 | 1 | 75.6  | 4.75  | 70 | 1 |
| Q9HCG8     | Pre-mRNA-s            | 2 | 2 | 2 | 105.4 | 7.03  | 30 | 2 |
| Q1HDL3     | HBeAg-bind            | 2 | 2 | 2 | 32    | 7.62  | 57 | 2 |
| I3VM53     | F-box and             | 2 | 2 | 2 | 132.7 | 7.58  | 42 | 2 |

|            |                        |   |   |   |       |       |     |   |
|------------|------------------------|---|---|---|-------|-------|-----|---|
| Q9NV31     | U3 small nu13.0434783  | 2 | 2 | 2 | 21.8  | 9.5   | 0   | 2 |
| Q8N6T3     | ADP-ribosyl10.0985222  | 3 | 3 | 3 | 44.6  | 5.66  | 0   | 3 |
| Q96G03     | Phosphogluc4.08496732  | 2 | 2 | 2 | 68.2  | 6.73  | 25  | 2 |
| Q9UL15     | BAG family 4.25055928  | 1 | 1 | 1 | 51.2  | 6.05  | 38  | 1 |
| AOA024QYZO | Sec61 gamma29.4117647  | 2 | 2 | 2 | 7.7   | 9.99  | 76  | 2 |
| Q6YHK3     | CD109 anti1.31487889   | 1 | 1 | 1 | 161.6 | 5.85  | 52  | 1 |
| O60783     | 28S ribosom 10.15625   | 1 | 2 | 1 | 15.1  | 11.41 | 41  | 1 |
| Q13618     | Cullin-3 O6 4.296875   | 2 | 2 | 2 | 88.9  | 8.48  | 28  | 2 |
| Q9Y3B8     | Oligoribont10.1265823  | 2 | 2 | 2 | 26.8  | 6.87  | 22  | 2 |
| Q9UI09     | NADH dehydr6.20689655  | 2 | 2 | 2 | 17.1  | 9.63  | 60  | 2 |
| B8ZZ87     | Mitotic-spl13.3027523  | 2 | 2 | 2 | 22.3  | 10.15 | 55  | 2 |
| P52434     | DNA-directio10.6666667 | 1 | 1 | 1 | 17.1  | 4.68  | 87  | 1 |
| B7ZKS3     | Ubiquitin c1.15942029  | 1 | 1 | 1 | 118.9 | 6     | 63  | 1 |
| Q8N4Q1     | Mitochondri16.1971831  | 1 | 1 | 1 | 16    | 4.31  | 0   | 1 |
| E7EW49     | CLIP-associ2.17965654  | 2 | 3 | 1 | 165.6 | 8.25  | 0   | 2 |
| Q14197     | Peptidyl-tf11.1650485  | 2 | 2 | 2 | 23.6  | 10.07 | 32  | 2 |
| Q7Z5L9     | Interferon 3.40715503  | 1 | 1 | 1 | 61    | 8.69  | 0   | 1 |
| Q92882     | Osteoclast-18.2242991  | 2 | 2 | 2 | 23.8  | 5.68  | 0   | 2 |
| P52298     | Nuclear cap26.9230769  | 3 | 3 | 3 | 18    | 8.21  | 48  | 3 |
| B2RBS8     | cDNA, FLJ92.46305419   | 1 | 2 | 1 | 69.3  | 6.28  | 31  | 1 |
| P08651     | Nuclear fac 9.2519685  | 2 | 2 | 2 | 55.6  | 8.38  | 41  | 2 |
| P53634     | Dipeptidyl 2.59179266  | 1 | 2 | 1 | 51.8  | 6.99  | 36  | 1 |
| AOA024R9M9 | Calcium bir8.20512821  | 1 | 1 | 1 | 22.4  | 5.1   | 58  | 1 |
| Q9Y4W2     | Ribosomal t2.17983651  | 1 | 1 | 1 | 83    | 4.73  | 49  | 1 |
| O75494     | Serine/argi4.58015267  | 2 | 3 | 2 | 31.3  | 11.27 | 44  | 2 |
| P57088     | Transmembr7.69230769   | 2 | 2 | 2 | 28    | 9.7   | 54  | 2 |
| O60936     | Nucleolar r 12.5       | 1 | 1 | 1 | 22.6  | 4.18  | 44  | 1 |
| Q6P1Q9     | Methyltran9.25925926   | 2 | 2 | 2 | 43.4  | 5.86  | 35  | 2 |
| E9PN81     | Ribonuclea6.07287449   | 1 | 1 | 1 | 26.3  | 6.37  | 46  | 1 |
| P15291     | Beta-1,4-g5.27638191   | 2 | 2 | 2 | 43.9  | 8.65  | 47  | 2 |
| B7ZC38     | Endophilin- 2.75       | 1 | 2 | 1 | 44.3  | 5.82  | 37  | 1 |
| B4EOE0     | cDNA FLJ546.52920962   | 1 | 1 | 1 | 32.5  | 9.51  | 49  | 1 |
| Q9NUP9     | Protein lir11.1675127  | 2 | 2 | 2 | 21.8  | 8.43  | 69  | 2 |
| Q9H944     | Mediator of6.60377358  | 1 | 1 | 1 | 23.2  | 6.87  | 65  | 1 |
| AOA024R5J5 | H. sapiens r10.0961538 | 2 | 4 | 1 | 23.6  | 5.54  | 123 | 2 |
| AOA0S2Z5C3 | PAK1 inter3.57142857   | 1 | 1 | 1 | 43.9  | 8.91  | 32  | 1 |
| P63218     | Guanine nuc26.4705882  | 2 | 3 | 2 | 7.3   | 9.85  | 117 | 2 |
| V9HW48     | SH3 domain-15.7894737  | 1 | 1 | 1 | 12.8  | 5.25  | 60  | 1 |
| Q13131     | 5'-AMP-acti4.29338104  | 2 | 2 | 2 | 64    | 8.12  | 74  | 2 |
| AOA140VJQ6 | Oxysterol-t4.14993307  | 2 | 2 | 2 | 83.6  | 7.06  | 72  | 2 |
| Q8N6H7     | ADP-ribosyl2.11132438  | 1 | 1 | 1 | 56.7  | 7.99  | 66  | 1 |
| P52306     | Rap1 GPase 2.1416804   | 1 | 1 | 1 | 66.3  | 5.31  | 58  | 1 |
| Q86XZ4     | Spermatoger4.58715596  | 2 | 2 | 2 | 59.5  | 8.9   | 36  | 2 |
| Q9H788     | SH2 domain-5.50660793  | 2 | 3 | 2 | 52.7  | 8.06  | 47  | 2 |
| Q8WUK0     | Phosphatidy6.46766169  | 1 | 1 | 1 | 22.8  | 9.77  | 62  | 1 |
| Q9NY61     | Protein AA15.35714286  | 2 | 2 | 2 | 63.1  | 4.94  | 34  | 2 |
| Q9BUT1     | 3-hydroxybu 9.3877551  | 1 | 1 | 1 | 26.7  | 7.65  | 0   | 1 |
| Q59FM4     | Scavenger r5.50774527  | 3 | 3 | 3 | 64.1  | 8.54  | 19  | 3 |
| Q4J6C6     | Prolyl endc8.11554333  | 3 | 3 | 3 | 83.9  | 6.38  | 21  | 3 |
| Q96RN5     | Mediator of2.28426396  | 1 | 1 | 1 | 86.7  | 9.42  | 57  | 1 |
| Q5T7S2     | Receptor pi4.37375746  | 2 | 2 | 2 | 55.9  | 7.55  | 46  | 2 |
| Q15059     | Bromodomair4.54545455  | 3 | 3 | 2 | 79.5  | 9.36  | 0   | 3 |
| Q9NX18     | Succinate c8.43373494  | 1 | 1 | 1 | 19.6  | 6.8   | 52  | 1 |
| AOA140VJX5 | Testicular 7.66488414  | 3 | 3 | 3 | 62.9  | 8.63  | 37  | 3 |
| O60443     | Non-syndron4.63709677  | 2 | 2 | 2 | 54.5  | 5.17  | 40  | 2 |
| Q9NX47     | E3 ubiquiti5.75539568  | 1 | 1 | 1 | 31.2  | 8.7   | 0   | 1 |
| P49903     | Selenide, v3.31632653  | 1 | 1 | 1 | 42.9  | 5.97  | 86  | 1 |
| AOA087WU53 | Magnesium r8.99182561  | 3 | 3 | 3 | 41.5  | 9.94  | 36  | 3 |
| Q658J6     | Microtubule 19.2       | 2 | 2 | 2 | 14.7  | 8.94  | 44  | 2 |
| O75569     | Interferon-4.79233227  | 1 | 1 | 1 | 34.4  | 8.41  | 65  | 1 |
| B2R4G1     | cDNA, FLJ92.3548387    | 1 | 2 | 1 | 10.1  | 9.52  | 57  | 1 |
| Q9BZ17     | Regulator c4.34782609  | 2 | 2 | 2 | 57.7  | 9.48  | 38  | 2 |
| Q92599     | Septin-8 O6.21118012   | 2 | 3 | 1 | 55.7  | 6.28  | 33  | 2 |
| Q86X83     | COMM domain13.5678392  | 3 | 3 | 3 | 22.7  | 6.73  | 39  | 3 |
| AOA024QZ26 | Histone de1.81069959   | 2 | 2 | 2 | 131.3 | 5.3   | 44  | 2 |
| Q8TEA8     | D-tyrosyl-113.3971292  | 2 | 2 | 2 | 23.4  | 8.24  | 34  | 2 |
| J3QR07     | YTH domain-4.21768707  | 3 | 4 | 3 | 85.5  | 6.23  | 25  | 3 |
| A8MWD9     | Putative sn17.1052632  | 1 | 1 | 1 | 8.5   | 8.84  | 67  | 1 |
| Q6P1L8     | 39S ribosom13.1034483  | 1 | 1 | 1 | 15.9  | 10.24 | 62  | 1 |
| Q6NUL7     | SPTLC1 prot2.33918129  | 1 | 1 | 1 | 57.4  | 7.46  | 52  | 1 |
| Q6NYC1     | Bifunction2.22580645   | 1 | 1 | 1 | 46.4  | 8.69  | 72  | 1 |
| B2RAM2     | cDNA, FLJ92.4600246    | 2 | 2 | 2 | 92.6  | 7.65  | 58  | 2 |
| Q53F19     | Nuclear cap2.09677419  | 1 | 1 | 1 | 70.5  | 5.73  | 61  | 1 |

|            |                       |   |   |   |       |       |    |   |
|------------|-----------------------|---|---|---|-------|-------|----|---|
| Q13546     | Receptor-ir1.93740686 | 1 | 1 | 1 | 75.9  | 6.33  | 0  | 1 |
| Q96GC5     | 39S ribosom6.13207547 | 1 | 1 | 1 | 23.9  | 8.98  | 57 | 1 |
| Q86TP1     | Protein prt4.63576159 | 1 | 1 | 1 | 50.2  | 5.5   | 32 | 1 |
| P07203     | Glutathion6.7783251   | 2 | 2 | 2 | 22.1  | 6.55  | 25 | 2 |
| B3KW34     | Protein YIF 4.6692607 | 1 | 1 | 1 | 28    | 4.36  | 49 | 1 |
| AOA075B7F8 | Nuclear env2.27827502 | 2 | 2 | 2 | 125   | 10.37 | 49 | 2 |
| AOA087X256 | WASH compl1.10732538  | 1 | 1 | 1 | 136.4 | 7.44  | 0  | 1 |
| Q9H7E9     | UPF0488 prc6.98689956 | 1 | 1 | 1 | 25    | 9.95  | 48 | 1 |
| Q9ULC5     | Long-chain-3.66032211 | 2 | 2 | 2 | 75.9  | 6.92  | 45 | 2 |
| Q9Y3Z3     | Deoxynuclec2.07667732 | 1 | 1 | 1 | 72.2  | 7.14  | 70 | 1 |
| O15198     | Mothers ag2.78372591  | 1 | 1 | 1 | 52.5  | 7.77  | 49 | 1 |
| B2RE11     | cDNA, FLJ918.1818182  | 3 | 3 | 3 | 18.4  | 9.44  | 0  | 3 |
| Q619Y2     | THO comple10.7843137  | 2 | 2 | 2 | 23.7  | 5.67  | 77 | 2 |
| B1ANH6     | Guanylate 16.61157025 | 1 | 1 | 1 | 26.3  | 8.92  | 47 | 1 |
| AOA0D9SF58 | Chromosome 2.36486486 | 2 | 2 | 2 | 129.3 | 9.41  | 48 | 2 |
| Q13188     | Serine/thre5.09164969 | 2 | 2 | 2 | 56.3  | 5.24  | 0  | 2 |
| V9HWG3     | Epididymis 4.07569141 | 2 | 2 | 2 | 77.3  | 5.22  | 56 | 2 |
| Q9HC07     | Transmembr14.8148148  | 2 | 2 | 2 | 34.9  | 7.02  | 27 | 2 |
| P51003     | Poly(A) pol1.61073826 | 1 | 1 | 1 | 82.8  | 7.37  | 58 | 1 |
| X5D299     | Aldehyde de 4.5620438 | 2 | 2 | 2 | 58.6  | 8.09  | 47 | 2 |
| Q13443     | Disintegrin4.51770452 | 2 | 2 | 2 | 90.5  | 7.52  | 0  | 2 |
| Q96GE9     | Transmembr32.7586207  | 1 | 1 | 1 | 12.2  | 9.77  | 0  | 1 |
| Q86WB0     | Nuclear-int2.98804781 | 1 | 1 | 1 | 55.2  | 5.62  | 63 | 1 |
| Q13823     | Nucleolar ( 4.9247606 | 4 | 4 | 4 | 83.6  | 9.25  | 23 | 4 |
| AOA024R1X3 | Vacuolar pil1.3636364 | 1 | 1 | 1 | 20.7  | 6.34  | 0  | 1 |
| Q14657     | EKC/KEOPS c31.4685315 | 2 | 4 | 2 | 14.8  | 8.63  | 0  | 2 |
| Q9BU76     | Multiple my5.32319392 | 1 | 1 | 1 | 29.4  | 10.02 | 70 | 1 |
| P50148     | Guanine nuc 6.1281337 | 2 | 2 | 1 | 42.1  | 5.68  | 43 | 2 |
| Q9BRT9     | DNA replic6.27802691  | 1 | 1 | 1 | 26    | 4.98  | 64 | 1 |
| Q8IXB1     | DnaJ homol1.26103405  | 1 | 1 | 1 | 91    | 7.18  | 75 | 1 |
| P19838     | Nuclear fac3.09917355 | 2 | 2 | 2 | 105.3 | 5.4   | 46 | 2 |
| AOA140VJZ4 | Ubiquitin c5.65217391 | 1 | 1 | 1 | 26.2  | 4.92  | 66 | 1 |
| AOA024R6D1 | NIMA (Never3.06435138 | 3 | 3 | 3 | 107.1 | 5.73  | 41 | 3 |
| HOYE88     | Transcripti10.5633803 | 3 | 3 | 3 | 47.9  | 8.15  | 36 | 3 |
| Q13610     | Periodic tr2.59481038 | 1 | 1 | 1 | 55.8  | 4.77  | 48 | 1 |
| P46977     | Dolichyl-di4.11347518 | 3 | 3 | 2 | 80.5  | 8.07  | 53 | 3 |
| Q5SNT2     | Transmembr1.5015015   | 1 | 1 | 1 | 72.2  | 9.22  | 77 | 1 |
| Q9NY27     | Serine/thre 6.7146283 | 2 | 3 | 2 | 46.9  | 4.54  | 0  | 2 |
| AOA024QZM3 | Eukaryotic 11.6666667 | 1 | 1 | 1 | 12.9  | 6.67  | 64 | 1 |
| P82912     | 28S ribosom 8.7628866 | 1 | 1 | 1 | 20.6  | 10.81 | 0  | 1 |
| J3QQJ0     | SAP30-bind1 4         | 1 | 1 | 1 | 35.9  | 4.98  | 69 | 1 |
| Q6IBP4     | LAPTM4A prc11.5879828 | 1 | 1 | 1 | 26.8  | 6.49  | 0  | 1 |
| Q9BTY7     | Protein HGF5.64102564 | 2 | 2 | 2 | 42.1  | 4.81  | 49 | 2 |
| AOA024RDV7 | Importin st3.64683301 | 2 | 2 | 2 | 57.8  | 4.94  | 54 | 2 |
| Q7LGA3     | Heparan sul4.49438202 | 1 | 1 | 1 | 41.9  | 8.69  | 51 | 1 |
| O43920     | NADH dehyd18.8679245  | 2 | 2 | 2 | 12.5  | 9.14  | 49 | 2 |
| P50583     | Bis(5'-nuc19.52380952 | 1 | 1 | 1 | 16.8  | 5.35  | 39 | 1 |
| Q8IYI6     | Exocyst con1.93103448 | 1 | 1 | 1 | 81.7  | 5.49  | 41 | 1 |
| Q9P035     | Very-long-c5.80110497 | 1 | 1 | 1 | 43.1  | 8.94  | 31 | 1 |
| Q8NBU5     | ATPase fami8.31024931 | 2 | 2 | 2 | 40.7  | 6.9   | 35 | 2 |
| F5H039     | Gephyrin O1.91815857  | 1 | 1 | 1 | 84.7  | 5.73  | 0  | 1 |
| Q6PJG6     | BRCA1-assoc1.46163216 | 1 | 1 | 1 | 88.1  | 5.27  | 62 | 1 |
| Q96GL3     | IRF3 protei3.09734513 | 1 | 1 | 1 | 49.1  | 6.52  | 53 | 1 |
| B4DY17     | Methylthio5.40540541  | 1 | 2 | 1 | 29.2  | 8.15  | 35 | 1 |
| Q9NX74     | tRNA-dihyd5.07099391  | 2 | 2 | 2 | 55    | 7.11  | 17 | 2 |
| AOA023QXNO | ATP syntha13.2352941  | 2 | 6 | 2 | 8     | 10.1  | 0  | 2 |
| Q9UNS1     | Protein tin1.32450331 | 1 | 2 | 1 | 138.6 | 5.4   | 36 | 1 |
| E9PLN8     | Uncharacter 7.8313253 | 1 | 1 | 1 | 17.9  | 8.62  | 37 | 1 |
| Q9Y2Z9     | Ubiquinone 2.77777778 | 1 | 1 | 1 | 50.8  | 7.3   | 41 | 1 |
| P30536     | Translocat4.73372781  | 1 | 2 | 1 | 18.8  | 9.36  | 46 | 1 |
| A8K5R6     | Golgi SNAP 5.2        | 1 | 1 | 1 | 28.6  | 9.42  | 40 | 1 |
| A8K5S3     | cDNA FLJ787.14285714  | 3 | 3 | 3 | 39.7  | 5.35  | 44 | 3 |
| G3V3G9     | Uncharacter1.46471372 | 1 | 1 | 1 | 84.7  | 5.12  | 50 | 1 |
| Q8IVF2     | Protein AHP3.38222606 | 3 | 3 | 3 | 616.2 | 5.36  | 34 | 3 |
| P09132     | Signal recc10.4166667 | 1 | 1 | 1 | 16.1  | 9.85  | 45 | 1 |
| Q9UII2     | ATPase inhi17.9245283 | 3 | 5 | 3 | 12.2  | 9.35  | 30 | 3 |
| Q9NPA0     | ER membran5.37190083  | 1 | 2 | 1 | 26.5  | 9.25  | 45 | 1 |
| P56385     | ATP syntha30.4347826  | 2 | 2 | 2 | 7.9   | 9.35  | 44 | 2 |
| AOA087WYN9 | ATP-depend1.02189781  | 1 | 1 | 1 | 155.2 | 8.15  | 27 | 1 |
| O60927     | Protein phc26.1904762 | 2 | 2 | 2 | 13.9  | 7.01  | 0  | 2 |
| Q9H845     | Acyl-CoA de 3.8647343 | 2 | 2 | 2 | 68.7  | 7.96  | 46 | 2 |
| Q6NX51     | Exocyst con3.38809035 | 2 | 2 | 2 | 110.4 | 6.49  | 41 | 2 |
| B4DPG9     | cDNA FLJ5915.45977011 | 2 | 2 | 2 | 37.5  | 9.89  | 36 | 2 |

|            |             |              |   |   |   |       |       |    |   |
|------------|-------------|--------------|---|---|---|-------|-------|----|---|
| Q8IYB8     | ATP-depend  | 4.45292621   | 3 | 3 | 3 | 87.9  | 7.99  | 36 | 3 |
| Q5VZF2     | Muscleblin  | 7.50670241   | 3 | 3 | 3 | 40.5  | 8.38  | 28 | 3 |
| B2RB57     | cDNA, FLJ9  | 2.41820768   | 1 | 1 | 1 | 77.9  | 6.24  | 62 | 1 |
| B9ZVT1     | RNA-binding | 5.6753689    | 2 | 2 | 2 | 102.6 | 7.53  | 49 | 2 |
| Q5T5H1     | Alpha-endo  | 5.88235294   | 1 | 1 | 1 | 21    | 7.87  | 54 | 1 |
| Q9NRG9     | Aladin OS   | 4.3956044    | 2 | 2 | 2 | 59.5  | 7.5   | 39 | 2 |
| Q6WKZ4     | Rab11 fami  | 10.93530787  | 1 | 1 | 1 | 137.1 | 5.43  | 60 | 1 |
| O60675     | Transcripti | 11.5384615   | 2 | 2 | 2 | 17.5  | 10.1  | 38 | 2 |
| Q5ST80     | FLOT1 prote | 5.15222482   | 2 | 2 | 2 | 47.3  | 7.49  | 52 | 2 |
| Q15555     | Microtubul  | 5.81039755   | 2 | 2 | 2 | 37    | 5.57  | 15 | 2 |
| C9JA93     | TBC1 domai  | 7.1942446    | 1 | 1 | 1 | 32.1  | 8.84  | 0  | 1 |
| Q9HC36     | rRNA methyl | 5.47619048   | 2 | 2 | 2 | 47    | 8.73  | 47 | 2 |
| Q69YH5     | Cell divisi | 2.63929619   | 1 | 1 | 1 | 112.6 | 8.4   | 0  | 1 |
| A6NHB5     | Zinc finger | 1.02040816   | 1 | 1 | 1 | 152.5 | 6.35  | 70 | 1 |
| Q9H1A6     | RPB11a prot | 14.1732283   | 1 | 1 | 1 | 14.1  | 5.87  | 0  | 1 |
| P13984     | General tr  | 9.23694779   | 2 | 2 | 2 | 28.4  | 9.23  | 35 | 2 |
| B2R5I8     | cDNA, FLJ9  | 2.33333333   | 1 | 1 | 1 | 24.9  | 6.68  | 63 | 1 |
| P58557     | Putative ri | 9.58083832   | 1 | 1 | 1 | 19.3  | 7.55  | 32 | 1 |
| O75438     | NADH dehyd  | 15.5172414   | 2 | 2 | 2 | 7     | 8.92  | 40 | 2 |
| O00186     | Syntaxin-bi | 3.37837838   | 2 | 2 | 2 | 67.7  | 7.8   | 68 | 2 |
| J3KQL8     | Apolipoprot | 4.89977728   | 2 | 2 | 2 | 48.9  | 6     | 53 | 2 |
| A0A1BOGTU4 | Paxillin O  | 3.23774283   | 2 | 2 | 2 | 115.8 | 5.64  | 0  | 2 |
| P29084     | Transcripti | 12.0274914   | 2 | 2 | 2 | 33    | 9.66  | 0  | 2 |
| Q9NWX4     | UPF0587 pr  | 10.625       | 1 | 2 | 1 | 18    | 5.01  | 26 | 1 |
| Q9UPQ0     | LIM and cal | 7.20221607   | 3 | 3 | 3 | 121.8 | 6.47  | 34 | 3 |
| Q15054     | DNA polymer | 4.72103004   | 2 | 2 | 2 | 51.4  | 9.35  | 42 | 2 |
| P20339     | Ras-relate  | 10.2325581   | 2 | 2 | 1 | 23.6  | 8.15  | 27 | 2 |
| E7EVC7     | Autophagy   | -3.52564103  | 1 | 1 | 1 | 70    | 6.62  | 38 | 1 |
| Q7Z7F7     | 39S riboso  | 17.96875     | 2 | 2 | 2 | 15.1  | 11.15 | 40 | 2 |
| P62070     | Ras-relate  | 5.88235294   | 1 | 1 | 1 | 23.4  | 6.01  | 73 | 1 |
| Q9BUR4     | Telomerase  | 3.28467153   | 1 | 1 | 1 | 59.3  | 4.58  | 43 | 1 |
| Q8N8A6     | ATP-depend  | 3.6036036    | 2 | 2 | 2 | 72.4  | 8.16  | 0  | 2 |
| Q99755     | Phosphatid  | 2.13523132   | 1 | 2 | 1 | 62.6  | 8.21  | 44 | 1 |
| P29083     | General tr  | 3.41685649   | 1 | 1 | 1 | 49.4  | 4.82  | 53 | 1 |
| O75381     | Peroxisoma  | 16.63129973  | 1 | 1 | 1 | 41.2  | 4.94  | 0  | 1 |
| Q9H501     | ESF1 homol  | 1.64512338   | 1 | 1 | 1 | 98.7  | 5.11  | 52 | 1 |
| Q92905     | COP9 signa  | 2.99401198   | 1 | 1 | 1 | 37.6  | 6.54  | 50 | 1 |
| Q9BW91     | ADP-ribose  | 2.85714286   | 1 | 1 | 1 | 39.1  | 8.22  | 49 | 1 |
| Q9BUM1     | Glucose-6   | -16.06936416 | 1 | 1 | 1 | 38.7  | 8.21  | 0  | 1 |
| I3L4A1     | Charged mu  | 5.80357143   | 1 | 1 | 1 | 25.8  | 4.92  | 61 | 1 |
| A0A140TA86 | MICOS comp  | 12.8571429   | 1 | 2 | 1 | 15.4  | 9.03  | 0  | 1 |
| Q6ZWH1     | cDNA FLJ4   | 14.08163265  | 1 | 1 | 1 | 45.4  | 5.26  | 0  | 1 |
| Q9NUI1     | Peroxisoma  | 7.87671233   | 2 | 2 | 2 | 30.8  | 9.22  | 35 | 2 |
| Q8NBK3     | Sulfatase   | -4.01069519  | 1 | 1 | 1 | 40.5  | 6.65  | 51 | 1 |
| Q96GM5     | SWI/SNF-re  | 12.52427184  | 1 | 1 | 1 | 58.2  | 9.25  | 74 | 1 |
| Q15714     | TSC22 dom   | 1.11835974   | 1 | 1 | 1 | 109.6 | 5.64  | 66 | 1 |
| A8K3B6     | Tyrosine-p  | 4.44444444   | 2 | 2 | 2 | 50.7  | 7.06  | 38 | 2 |
| O43676     | NADH dehyd  | 12.244898    | 1 | 2 | 1 | 11.4  | 9.2   | 0  | 1 |
| B2RCM6     | cDNA, FLJ9  | 8.30039526   | 1 | 1 | 1 | 28.2  | 9.54  | 75 | 1 |
| Q15006     | ER membran  | 4.04040404   | 1 | 1 | 1 | 34.8  | 6.57  | 49 | 1 |
| Q9NYV6     | RNA polyme  | 4.30107527   | 1 | 1 | 1 | 74.1  | 5.63  | 18 | 1 |
| A0A024R156 | Guanine nuc | 16.1764706   | 1 | 1 | 1 | 7.2   | 7.85  | 49 | 1 |
| A0A0A0MTNO | Cullin-2 O  | 2.50659631   | 2 | 2 | 2 | 88.4  | 6.93  | 31 | 2 |
| Q06547     | GA-binding  | 4.55696203   | 2 | 2 | 2 | 42.5  | 4.86  | 69 | 2 |
| Q9H9A5     | CCR4-NOT    | 11.61290323  | 1 | 1 | 1 | 82.3  | 7.78  | 50 | 1 |
| O15230     | Laminin su  | 0.32476319   | 1 | 1 | 1 | 399.5 | 7.02  | 68 | 1 |
| Q8TED1     | Probable g  | 15.26315789  | 1 | 1 | 1 | 23.9  | 9.35  | 35 | 1 |
| Q9Y6D0     | Selenoprot  | 12.7659574   | 1 | 1 | 1 | 10.6  | 10.86 | 43 | 1 |
| B0LPF3     | Growth fact | 11.0599078   | 2 | 2 | 2 | 25.2  | 6.32  | 49 | 2 |
| Q10589     | Bone marrow | 10           | 2 | 2 | 2 | 19.8  | 5.6   | 40 | 2 |
| Q9UBD5     | Origin recc | 1.82841069   | 1 | 1 | 1 | 82.2  | 7.61  | 45 | 1 |
| Q96FX7     | tRNA (adeni | 6.2283737    | 1 | 1 | 1 | 31.4  | 7.36  | 41 | 1 |
| P49750     | YLP motif   | -1.07637109  | 2 | 2 | 2 | 219.8 | 6.57  | 0  | 2 |
| Q9Y4W6     | AFG3-like   | 12.13299875  | 1 | 1 | 1 | 88.5  | 8.66  | 33 | 1 |
| V9HW00     | Epididymis  | 4.43786982   | 1 | 1 | 1 | 39    | 9.57  | 45 | 1 |
| A0A024R7X7 | Staufen, R  | 2.45614035   | 1 | 2 | 1 | 62.6  | 9.61  | 30 | 1 |
| A0A024R3A2 | DCN1-like   | 18.01687764  | 2 | 2 | 2 | 27.5  | 5.58  | 34 | 2 |
| Q86UL3     | Glycerol-3  | -2.63157895  | 1 | 1 | 1 | 52    | 9.19  | 0  | 1 |
| Q16626     | Male-enhanc | 7.02702703   | 1 | 1 | 1 | 19.9  | 4.22  | 45 | 1 |
| Q5TDH0     | Protein DD  | 110.0250627  | 2 | 4 | 2 | 44.5  | 5.05  | 54 | 2 |
| B2RDZ9     | cDNA, FLJ9  | 7.56013746   | 1 | 1 | 1 | 31.9  | 5.27  | 0  | 1 |
| P40123     | Adenylyl c  | 3.14465409   | 1 | 1 | 1 | 52.8  | 6.37  | 49 | 1 |
| Q92538     | Golgi-speci | 0.64550834   | 1 | 1 | 1 | 206.3 | 5.73  | 43 | 1 |



|            |              |              |   |   |   |       |      |    |   |
|------------|--------------|--------------|---|---|---|-------|------|----|---|
| P51648     | Fatty aldehy | 2.4742268    | 1 | 1 | 1 | 54.8  | 7.88 | 54 | 1 |
| Q59G98     | TIA1 protei  | 2.5862069    | 1 | 1 | 1 | 51.3  | 7.83 | 63 | 1 |
| O75886     | Signal trar  | 4.38095238   | 2 | 2 | 2 | 58.1  | 5.07 | 35 | 2 |
| P11802     | Cyclin-depe  | 9.24092409   | 2 | 2 | 1 | 33.7  | 7.01 | 35 | 2 |
| AOA087WXU3 | Extended s   | 3.80021716   | 1 | 1 | 1 | 102.3 | 9.26 | 0  | 1 |
| Q9BVC4     | Target of r  | 3.37423313   | 1 | 1 | 1 | 35.9  | 5.86 | 34 | 1 |
| B2RC06     | cDNA, FLJ9   | 4.36046512   | 1 | 1 | 1 | 39.3  | 9.36 | 35 | 1 |
| Q86Y82     | Syntaxin-1   | 11.9565217   | 2 | 2 | 2 | 31.6  | 5.59 | 51 | 2 |
| O14907     | Tax1-bindir  | 13.7096774   | 1 | 1 | 1 | 13.7  | 8.48 | 37 | 1 |
| Q9COF1     | Centrosomal  | 6.41025641   | 1 | 1 | 1 | 44.1  | 5.21 | 39 | 1 |
| Q99808     | Equilibrati  | 7.45614035   | 2 | 2 | 2 | 50.2  | 8.29 | 54 | 2 |
| P09497     | Clathrin li  | 6.98689956   | 1 | 1 | 1 | 25.2  | 4.64 | 45 | 1 |
| Q9Y4C8     | Probable R1  | 1.77083333   | 2 | 2 | 2 | 107.3 | 6.54 | 44 | 2 |
| O00483     | Cytochrome   | 22.2222222   | 2 | 3 | 2 | 9.4   | 9.38 | 68 | 2 |
| P07711     | Cathepsin I  | 3.6036036    | 1 | 1 | 1 | 37.5  | 5.45 | 37 | 1 |
| E5KN59     | Peptidyl-p   | 4.32432432   | 1 | 1 | 1 | 40.7  | 7.21 | 0  | 1 |
| P01033     | Metalloprot  | 7.7294686    | 1 | 1 | 1 | 23.2  | 8.1  | 0  | 1 |
| Q15126     | Phosphomev   | 9.89583333   | 1 | 1 | 1 | 22    | 5.73 | 0  | 1 |
| MQQXB5     | Persulfide   | 4.61538462   | 1 | 1 | 1 | 28.4  | 6.52 | 36 | 1 |
| Q8TCT8     | Signal pep1  | 2.69230769   | 1 | 1 | 1 | 58.1  | 8.32 | 0  | 1 |
| Q9NZ08     | Endoplasmic  | 2.44420829   | 2 | 2 | 2 | 107.2 | 6.46 | 0  | 2 |
| P29353     | SHC-transf   | 5.1457976    | 2 | 2 | 2 | 62.8  | 6.44 | 25 | 2 |
| O00178     | GTP-binding  | 4.48430493   | 2 | 2 | 2 | 72.4  | 8.34 | 44 | 2 |
| B4DKA9     | cDNA FLJ61   | 1.41342756   | 1 | 1 | 1 | 97.4  | 4.94 | 53 | 1 |
| Q9UNQ2     | Probable di  | 7.02875399   | 2 | 2 | 2 | 35.2  | 9.99 | 38 | 2 |
| O60566     | Mitotic che  | 2.47619048   | 2 | 2 | 2 | 119.5 | 5.27 | 51 | 2 |
| Q86V85     | Integral me  | 3.40909091   | 1 | 1 | 1 | 49.4  | 7.39 | 76 | 1 |
| Q9NP61     | ADP-ribosyl  | 4.26356589   | 2 | 2 | 2 | 56.9  | 7.36 | 20 | 2 |
| Q12972     | Nuclear inl  | 9.11680912   | 2 | 2 | 2 | 38.5  | 7.37 | 42 | 2 |
| AOA096LP10 | Putative bi  | 22.2222222   | 2 | 2 | 2 | 17.8  | 6.52 | 0  | 2 |
| B4DLM8     | cDNA FLJ561  | 1.75233645   | 1 | 1 | 1 | 95    | 6.58 | 57 | 1 |
| Q96B97     | SH3 domain   | -3.60902256  | 2 | 2 | 2 | 73.1  | 6.62 | 26 | 2 |
| Q6NVY1     | 3-hydroxyis  | 5.18134715   | 2 | 2 | 2 | 43.5  | 8.19 | 42 | 2 |
| Q00403     | Transcripti  | 4.43037975   | 1 | 1 | 1 | 34.8  | 8.35 | 0  | 1 |
| Q13951     | Core-bindir  | 10.4395604   | 2 | 2 | 2 | 21.5  | 6.6  | 40 | 2 |
| Q9UFC0     | Leucine-ric  | 3.09119011   | 2 | 2 | 2 | 70.8  | 7.21 | 58 | 2 |
| Q86YP4     | Transcripti  | 6.00315956   | 2 | 2 | 2 | 68    | 9.94 | 0  | 2 |
| Q53FE5     | Putative ur  | 9.88593156   | 2 | 2 | 2 | 28.3  | 8.38 | 0  | 2 |
| Q12962     | Transcripti  | 11.4678899   | 1 | 1 | 1 | 21.7  | 6.57 | 53 | 1 |
| Q30201     | Hereditary   | 3.73563218   | 1 | 1 | 1 | 40.1  | 6.6  | 40 | 1 |
| Q8N584     | Tetratricof  | 4.28816467   | 2 | 2 | 2 | 65.8  | 6.99 | 36 | 2 |
| P51151     | Ras-relatec  | 5.47263682   | 1 | 1 | 1 | 22.8  | 5.47 | 59 | 1 |
| Q969U7     | Proteasome   | 4.54545455   | 1 | 1 | 1 | 29.4  | 6.98 | 0  | 1 |
| Q92990     | Glomulin O   | 1.85185185   | 1 | 1 | 1 | 68.2  | 5.33 | 59 | 1 |
| Q12834     | Cell divisi  | 3.00601202   | 1 | 1 | 1 | 54.7  | 9.23 | 39 | 1 |
| Q96C23     | Aldose 1-ep  | 10.5263158   | 2 | 2 | 2 | 37.7  | 6.65 | 0  | 2 |
| Q59GG2     | Caspase 9    | 14.16666667  | 1 | 1 | 1 | 50.1  | 6.23 | 14 | 1 |
| Q9Y3A4     | Ribosomal    | 15.71428571  | 2 | 2 | 2 | 32.3  | 9.58 | 43 | 2 |
| B2RBM8     | cDNA, FLJ9   | 5.353902     | 3 | 4 | 3 | 123.5 | 7.42 | 28 | 3 |
| Q5SY16     | Polynucleot  | 2.27920228   | 2 | 2 | 2 | 79.3  | 9.13 | 0  | 2 |
| Q9UPQ9     | Trinucleoti  | 2.01854883   | 2 | 2 | 2 | 193.9 | 6.76 | 44 | 2 |
| O43148     | mRNA cap g   | 2.5210084    | 1 | 1 | 1 | 54.8  | 6.61 | 0  | 1 |
| Q7Z4H8     | KDEL motif   | -3.3530572   | 1 | 1 | 1 | 58.5  | 8.24 | 49 | 1 |
| O75208     | Ubiquinone   | 5.66037736   | 1 | 1 | 1 | 35.5  | 5.94 | 43 | 1 |
| Q9NW68     | BSD domain   | -5.81395349  | 1 | 1 | 1 | 47.1  | 4.49 | 0  | 1 |
| Q9UHG3     | Prenylcyste  | 2.37623762   | 1 | 2 | 1 | 56.6  | 6.18 | 0  | 1 |
| AOA140VK92 | Secretory c  | 3.64741641   | 1 | 1 | 1 | 36.6  | 6.1  | 42 | 1 |
| P51812     | Ribosomal    | 12.56756757  | 2 | 3 | 1 | 83.7  | 6.89 | 40 | 2 |
| AOA024R957 | Torsin A ir  | 6.80851064   | 2 | 2 | 2 | 51.2  | 4.96 | 44 | 2 |
| Q9Y3D8     | Adenylate    | 19.30232558  | 1 | 1 | 1 | 20    | 4.58 | 23 | 1 |
| Q9BRJ6     | Uncharacter  | 6.18556701   | 1 | 1 | 1 | 22.1  | 9.64 | 44 | 1 |
| Q92547     | DNA topoisc  | 1.44546649   | 1 | 1 | 1 | 170.6 | 6.96 | 0  | 1 |
| AOA087WZN1 | Isocitrate   | 4.65116279   | 2 | 2 | 2 | 42.4  | 8.46 | 45 | 2 |
| O15173     | Membrane-a   | 3.58744395   | 1 | 2 | 1 | 23.8  | 4.88 | 51 | 1 |
| P17050     | Alpha-N-ac   | 2.67639903   | 1 | 1 | 1 | 46.5  | 5.19 | 42 | 1 |
| Q15031     | Probable l   | 4.54042082   | 2 | 2 | 2 | 101.9 | 8.22 | 28 | 2 |
| Q9HCD5     | Nuclear rec  | 7.42659758   | 2 | 2 | 2 | 65.5  | 9.6  | 0  | 2 |
| Q96CM8     | Acyl-CoA s   | 3.08943089   | 1 | 1 | 1 | 68.1  | 7.55 | 39 | 1 |
| D3VVK7     | Ataxin 3 v   | 3.29113924   | 1 | 1 | 1 | 46.3  | 4.93 | 33 | 1 |
| B2R823     | cDNA, FLJ9   | 5.55555556   | 1 | 1 | 1 | 27.9  | 9.73 | 0  | 1 |
| Q9NVT9     | Armadillo    | 17.44680851  | 1 | 1 | 1 | 31.3  | 5.74 | 0  | 1 |
| AOA024R563 | Protein ph   | 12.5628141   | 1 | 1 | 1 | 21    | 5.22 | 0  | 1 |
| Q9UQRO     | Sex comb     | or4.28571429 | 2 | 2 | 2 | 77.2  | 8.54 | 37 | 2 |

|            |                        |   |   |   |       |       |    |   |
|------------|------------------------|---|---|---|-------|-------|----|---|
| Q9BZJ0     | Crooked nec2.47641509  | 2 | 2 | 2 | 100.4 | 8     | 16 | 2 |
| Q9HCN8     | Stromal cel9.04977376  | 1 | 1 | 1 | 23.6  | 7.03  | 0  | 1 |
| Q68CQ7     | Glycosyltr2.96495957   | 1 | 1 | 1 | 41.9  | 9.35  | 55 | 1 |
| Q14562     | ATP-depend2.21311475   | 2 | 2 | 2 | 139.2 | 8.32  | 0  | 2 |
| Q16186     | Proteasomal5.40540541  | 2 | 3 | 2 | 42.1  | 5.07  | 67 | 2 |
| F8VYN9     | ADP-ribosyl10.3092784  | 1 | 1 | 1 | 21.8  | 6.77  | 0  | 1 |
| Q9H9T3     | Elongator c6.03290676  | 2 | 2 | 2 | 62.2  | 8.88  | 0  | 2 |
| P62072     | Mitochondri15.55555556 | 1 | 1 | 1 | 10.3  | 6.29  | 21 | 1 |
| A1X283     | SH3 and PX 1.53677278  | 1 | 1 | 1 | 101.5 | 8.69  | 0  | 1 |
| B2R5U3     | EH-domain c3.74531835  | 3 | 4 | 2 | 60.6  | 6.83  | 50 | 3 |
| Q9UMS0     | NFU1 iron-e 6.2992126  | 1 | 1 | 1 | 28.4  | 5.07  | 38 | 1 |
| Q9BUV8     | Uncharacter11.6788321  | 1 | 2 | 1 | 15.5  | 5.2   | 26 | 1 |
| J3KNQ4     | Alpha-parvj3.88349515  | 1 | 1 | 1 | 46.6  | 8.4   | 51 | 1 |
| Q92685     | Dol-P-Man:12.73972603  | 1 | 1 | 1 | 50.1  | 9.44  | 56 | 1 |
| Q8N5A5     | Zinc finger4.14312618  | 2 | 2 | 2 | 57.3  | 5.43  | 64 | 2 |
| D3DUP1     | WNK lysine 0.96557515  | 2 | 2 | 2 | 250.6 | 6.34  | 0  | 2 |
| Q15813     | Tubulin-spe 4.5540797  | 1 | 1 | 1 | 59.3  | 6.76  | 0  | 1 |
| Q9NXW9     | Alpha-keto9.27152318   | 1 | 1 | 1 | 33.8  | 6.67  | 37 | 1 |
| A8K1U9     | cDNA FLJ7671.35317997  | 1 | 1 | 1 | 83    | 8.81  | 55 | 1 |
| Q59H05     | ATP-binding1.56555773  | 1 | 1 | 1 | 169.9 | 7.27  | 43 | 1 |
| P62312     | U6 snRNA-as 22.5       | 2 | 2 | 2 | 9.1   | 9.58  | 37 | 2 |
| Q4KMQ2     | Anoctamin-e1.20879121  | 1 | 1 | 1 | 106.1 | 7.77  | 46 | 1 |
| Q96BN8     | Ubiquitin t2.84090909  | 1 | 2 | 1 | 40.2  | 5.47  | 21 | 1 |
| Q9UMX5     | Neudesin 08.72093023   | 1 | 1 | 1 | 18.8  | 5.69  | 26 | 1 |
| AOA0D9SEY1 | Mitogen-act1.81818182  | 2 | 2 | 1 | 151   | 7.58  | 39 | 2 |
| P42785     | Lysosomal f2.41935484  | 1 | 1 | 1 | 55.8  | 7.21  | 67 | 1 |
| Q6NZI2     | Polymerase 2.82051282  | 1 | 2 | 1 | 43.5  | 5.6   | 46 | 1 |
| Q61N84     | rRNA methyl3.39943343  | 1 | 1 | 1 | 38.6  | 7.94  | 0  | 1 |
| Q96GDO     | Pyridoxal p4.72972973  | 1 | 1 | 1 | 31.7  | 6.55  | 57 | 1 |
| AOA087WWS1 | THO complex2.28310502  | 1 | 1 | 1 | 75.6  | 4.98  | 38 | 1 |
| Q53Y03     | COX4 neigh 10          | 2 | 2 | 2 | 23.8  | 6.4   | 41 | 2 |
| Q8WUX1     | Sodium-cou 3.1779661   | 2 | 2 | 2 | 51.4  | 8.21  | 41 | 2 |
| Q969X5     | Endoplasmic4.82758621  | 1 | 1 | 1 | 32.6  | 7.06  | 0  | 1 |
| P49711     | Transcriptil.23796424  | 1 | 1 | 1 | 82.7  | 6.96  | 43 | 1 |
| Q12899     | Tripartite 5.75139147  | 2 | 2 | 2 | 62.1  | 5.03  | 0  | 2 |
| B4DX69     | cDNA FLJ55112.6903553  | 1 | 1 | 1 | 21.8  | 8.57  | 0  | 1 |
| 094822     | E3 ubiquitil.41562854  | 1 | 1 | 1 | 200.4 | 6.25  | 0  | 1 |
| AOA0S2Z2Z3 | ATP-binding2.39043825  | 2 | 2 | 2 | 82.7  | 9.33  | 32 | 2 |
| D3DSQ0     | Pericentric0.54347826  | 1 | 1 | 1 | 228.4 | 5.02  | 64 | 1 |
| AOA024QZF1 | HCG19665, i2.10727969  | 1 | 1 | 1 | 53.2  | 5.31  | 31 | 1 |
| Q9BWE0     | Replicatio5.46737213   | 2 | 3 | 2 | 63.5  | 9.98  | 46 | 2 |
| Q9UL63     | Muskelin 05.176870748  | 1 | 1 | 1 | 84.7  | 6.34  | 53 | 1 |
| P51398     | 28S riboson3.01507538  | 1 | 1 | 1 | 45.5  | 8.88  | 40 | 1 |
| B2R680     | Signal trar1.88902007  | 2 | 2 | 2 | 94.1  | 6.23  | 39 | 2 |
| Q9NPF5     | DNA methylt2.56959315  | 1 | 1 | 1 | 53    | 9.5   | 62 | 1 |
| 060669     | Monocarboxy3.13807531  | 1 | 1 | 1 | 52.2  | 9.31  | 55 | 1 |
| Q9HCN4     | GPN-loop G12.94117647  | 1 | 1 | 1 | 41.7  | 4.92  | 51 | 1 |
| A8K032     | Translocati5.34759358  | 1 | 2 | 1 | 43    | 9.63  | 45 | 1 |
| Q9Y305     | Acyl-coenz4.78359909   | 2 | 2 | 2 | 49.9  | 8.6   | 0  | 2 |
| Q5VT52     | Regulation 1.16358658  | 1 | 1 | 1 | 155.9 | 7.42  | 44 | 1 |
| Q9Y3D3     | 28S riboson13.1386861  | 1 | 1 | 1 | 15.3  | 9.5   | 0  | 1 |
| AOA1L5BXV2 | Receptor ex5.97826087  | 1 | 2 | 1 | 20.7  | 8.56  | 35 | 1 |
| Q9P265     | Disco-inter 0.8248731  | 1 | 1 | 1 | 171.4 | 8.09  | 66 | 1 |
| P53602     | Diphosphome 3.25       | 1 | 1 | 1 | 43.4  | 7.23  | 45 | 1 |
| Q9NP77     | RNA polymer6.18556701  | 1 | 1 | 1 | 22.6  | 5.33  | 57 | 1 |
| O15260     | Surfeit loc6.69144981  | 2 | 2 | 2 | 30.4  | 7.78  | 53 | 2 |
| F5H189     | LYR motif-c10.7692308  | 1 | 1 | 1 | 15.2  | 10.4  | 40 | 1 |
| H0UI80     | Negative e12.67111853  | 2 | 2 | 2 | 67.3  | 5.21  | 60 | 2 |
| Q15650     | Activating 3.61445783  | 1 | 1 | 1 | 66.1  | 7.85  | 0  | 1 |
| Q7Z7E8     | Ubiquitin-c3.55450237  | 2 | 2 | 2 | 46.1  | 5.1   | 58 | 2 |
| Q9NRX2     | 39S riboson10.2857143  | 2 | 2 | 2 | 20    | 10.11 | 44 | 2 |
| B2R4X4     | cDNA, FLJ92 10.619469  | 1 | 1 | 1 | 12.7  | 5.21  | 0  | 1 |
| Q92889     | DNA repair 1.31004367  | 1 | 1 | 1 | 104.4 | 6.93  | 55 | 1 |
| Q9P0W2     | SWI/SNF-re19.77917981  | 2 | 2 | 2 | 35.8  | 9.35  | 16 | 2 |
| Q8IVS2     | Malonyl-Co/2.30769231  | 1 | 1 | 1 | 42.9  | 8.72  | 40 | 1 |
| P61927     | 60S riboson13.4020619  | 2 | 2 | 2 | 11.1  | 11.74 | 18 | 2 |
| Q9BYN0     | Sulfiredoxi7.29927007  | 1 | 1 | 1 | 14.3  | 8.19  | 52 | 1 |
| Q53GS9     | U4/U6.U5 t5.66371681   | 3 | 3 | 3 | 65.3  | 8.91  | 35 | 3 |
| 094888     | UBX domain-2.65848671  | 1 | 1 | 1 | 54.8  | 5.16  | 0  | 1 |
| Q99442     | Translocati 3.7593985  | 2 | 2 | 2 | 45.8  | 7.12  | 56 | 2 |
| AOAV96     | RNA-binding 1.8549747  | 1 | 1 | 1 | 64.1  | 7.68  | 35 | 1 |
| Q9UQN3     | Charged mul4.69483568  | 1 | 1 | 1 | 23.9  | 8.76  | 39 | 1 |
| Q8NBF2     | NHL repeat-3.71900826  | 3 | 3 | 3 | 79.4  | 5.55  | 34 | 3 |

|            |              |             |   |   |   |       |       |    |   |
|------------|--------------|-------------|---|---|---|-------|-------|----|---|
| 095298     | NADH dehydri | 16.8067227  | 1 | 1 | 1 | 14.2  | 8.98  | 0  | 1 |
| Q6P6C2     | RNA demethy  | 7.8680203   | 3 | 3 | 3 | 44.2  | 9.09  | 0  | 3 |
| D3DQS4     | Formin binc  | 1.47492625  | 1 | 1 | 1 | 110.2 | 4.75  | 65 | 1 |
| Q92646     | Histone H2f  | 8.69565217  | 1 | 2 | 1 | 12.6  | 10.9  | 77 | 1 |
| P16219     | Short-chair  | 3.15533981  | 1 | 1 | 1 | 44.3  | 7.99  | 49 | 1 |
| J3KNN3     | Phosphorylε  | 3.41463415  | 1 | 1 | 1 | 46.9  | 6.38  | 21 | 1 |
| J3KPT4     | TraB domain  | 3.16622691  | 1 | 1 | 1 | 42.7  | 8     | 67 | 1 |
| Q9BU61     | NADH dehydri | 7.60869565  | 1 | 1 | 1 | 20.3  | 8.22  | 0  | 1 |
| A4LAA3     | Alpha thalε  | 0.3611557   | 1 | 1 | 1 | 282.4 | 6.55  | 60 | 1 |
| C9JCC6     | Drl-associε  | 5.66037736  | 1 | 1 | 1 | 23.2  | 5.27  | 36 | 1 |
| 043823     | A-kinase ar  | 3.17919075  | 2 | 2 | 2 | 76.1  | 5.15  | 0  | 2 |
| Q6DD87     | Zinc finger  | 7.31070496  | 2 | 2 | 2 | 40.5  | 7.84  | 22 | 2 |
| Q92925     | SWI/SNF-re   | 12.07156309 | 1 | 1 | 1 | 58.9  | 9.64  | 27 | 1 |
| Q5T9L3     | Protein wnt  | 2.2181146   | 1 | 1 | 1 | 62.2  | 7.36  | 26 | 1 |
| B2R6K0     | cDNA, FLJ9f  | 1.58730159  | 1 | 1 | 1 | 84.5  | 5.72  | 49 | 1 |
| A8K0B5     | Protein arc  | 5.58659218  | 1 | 1 | 1 | 20.7  | 4.59  | 45 | 1 |
| Q9PJ7      | E3 ubiquiti  | 3.41207349  | 1 | 1 | 1 | 41.9  | 5.66  | 0  | 1 |
| Q8TD16     | Protein bic  | 2.30582524  | 1 | 1 | 1 | 93.5  | 5.44  | 0  | 1 |
| 075323     | Protein Nif  | 7.69230769  | 2 | 2 | 2 | 33.7  | 9.36  | 35 | 2 |
| B2RAU5     | Sorting ne   | 2.35294118  | 1 | 1 | 1 | 66.5  | 5.66  | 58 | 1 |
| Q9NQA3     | WAS protei   | 3.80313199  | 1 | 1 | 1 | 48    | 5.67  | 60 | 1 |
| Q96PC5     | Melanoma ir  | 1.13314448  | 1 | 1 | 1 | 159.7 | 4.69  | 24 | 1 |
| AOA024R8Y2 | POU domain   | 2.42261104  | 1 | 1 | 1 | 76.4  | 6.81  | 35 | 1 |
| AOA087X295 | WD repeat-c  | 2.08514335  | 1 | 1 | 1 | 124.9 | 6.92  | 0  | 1 |
| Q9Y394     | Dehydrogenε  | 3.24483776  | 1 | 1 | 1 | 38.3  | 8.32  | 45 | 1 |
| Q9UNN8     | Endothelial  | 5.46218487  | 1 | 1 | 1 | 26.7  | 7.18  | 0  | 1 |
| Q7L4I2     | Arginine/sc  | 5.06912442  | 2 | 2 | 2 | 50.5  | 11.33 | 0  | 2 |
| Q9NVV4     | Poly(A) RN   | 3.43642612  | 1 | 1 | 1 | 66.1  | 9.04  | 59 | 1 |
| Q9NQ92     | Coordinator  | 14.1304348  | 1 | 1 | 1 | 20.1  | 4.18  | 0  | 1 |
| Q96D71     | RalBP1-ass   | 2.7638191   | 2 | 2 | 2 | 86.6  | 5.69  | 47 | 2 |
| J3QR44     | Cyclin-depe  | 2.13836478  | 1 | 1 | 1 | 92.6  | 5.54  | 40 | 1 |
| Q8TC07     | TBC1 domain  | 4.19681621  | 2 | 2 | 2 | 79.4  | 5.67  | 31 | 2 |
| P08397     | Porphobilir  | 4.43213296  | 2 | 2 | 2 | 39.3  | 7.18  | 43 | 2 |
| Q14146     | Unhealthy r  | 1.18110236  | 2 | 2 | 2 | 170.4 | 7.31  | 32 | 2 |
| Q9NWX2     | Glucose-inc  | 7.45614035  | 1 | 1 | 1 | 26.7  | 4.97  | 0  | 1 |
| B4E2A6     | cDNA FLJ55   | 2.92553191  | 2 | 2 | 2 | 83.9  | 6.84  | 30 | 2 |
| P12074     | Cytochrome   | 26.6055046  | 1 | 1 | 1 | 12.1  | 9.32  | 0  | 1 |
| P38432     | Coilin OS=f  | 1.73611111  | 1 | 1 | 1 | 62.6  | 9.07  | 48 | 1 |
| F8W6G1     | Nuclear rec  | 2.76243094  | 1 | 1 | 1 | 60.8  | 5.16  | 0  | 1 |
| Q99735     | Microsomal   | 9.52380952  | 1 | 1 | 1 | 16.6  | 9.55  | 0  | 1 |
| Q96ST2     | Protein IW   | 3.17460317  | 2 | 2 | 2 | 91.9  | 4.69  | 17 | 2 |
| Q86WA8     | Lon proteas  | 2.23004695  | 1 | 1 | 1 | 94.6  | 7.3   | 33 | 1 |
| Q9NVH1     | DnaJ homol   | 1.78890877  | 1 | 1 | 1 | 63.2  | 8.4   | 50 | 1 |
| Q9BTC0     | Death-induc  | 2.05357143  | 3 | 3 | 3 | 243.7 | 7.88  | 0  | 3 |
| Q7Z7F0     | UPF0469 pr   | 2.11726384  | 1 | 1 | 1 | 64.8  | 8.73  | 58 | 1 |
| B2R4Q7     | Mitochondri  | 7.87401575  | 1 | 1 | 1 | 14.3  | 10.43 | 39 | 1 |
| Q5GLZ8     | Probable E   | 1.79754021  | 1 | 1 | 1 | 118.5 | 6.19  | 0  | 1 |
| Q15398     | Disks large  | 3.54609929  | 2 | 2 | 2 | 95.1  | 9     | 0  | 2 |
| Q9BX40     | Protein LSA  | 9.87012987  | 2 | 2 | 2 | 42    | 9.69  | 0  | 2 |
| P10114     | Ras-relatec  | 6.01092896  | 1 | 1 | 1 | 20.6  | 4.82  | 34 | 1 |
| Q9UBZ4     | DNA-(apurir  | 4.44015444  | 2 | 2 | 2 | 57.4  | 8.29  | 0  | 2 |
| Q6ZSJ8     | Uncharacter  | 10          | 1 | 1 | 1 | 11.5  | 6.73  | 43 | 1 |
| 014641     | Segment poll | 1.63043478  | 1 | 1 | 1 | 78.9  | 6.02  | 51 | 1 |
| Q13541     | Eukaryotic   | 10.1694915  | 1 | 1 | 1 | 12.6  | 5.48  | 55 | 1 |
| Q8WW22     | DnaJ homol   | 4.28211587  | 2 | 2 | 2 | 44.8  | 7.59  | 30 | 2 |
| P51159     | Ras-relatec  | 4.97737557  | 1 | 1 | 1 | 24.9  | 5.22  | 35 | 1 |
| Q92504     | Zinc trans   | 2.98507463  | 1 | 1 | 1 | 50.1  | 6.87  | 0  | 1 |
| Q5T280     | Putative me  | 6.11702128  | 2 | 2 | 2 | 42    | 7.43  | 13 | 2 |
| Q99614     | Tetratricor  | 3.76712329  | 1 | 1 | 1 | 33.5  | 4.84  | 41 | 1 |
| AOA0S2Z556 | Polyglutami  | 6.40569395  | 2 | 2 | 2 | 32.2  | 6.34  | 37 | 2 |
| Q96RU3     | Formin-binc  | 1.45867099  | 1 | 1 | 1 | 71.3  | 5.72  | 46 | 1 |
| 095721     | Synaptosomε  | 4.26356589  | 1 | 1 | 1 | 29    | 5.81  | 46 | 1 |
| 075792     | Ribonucleas  | 5.01672241  | 1 | 1 | 1 | 33.4  | 5.25  | 0  | 1 |
| Q15363     | Transmembrε  | 7.960199    | 2 | 2 | 2 | 22.7  | 5.17  | 31 | 2 |
| Q99816     | Tumor susc   | 2.56410256  | 1 | 1 | 1 | 43.9  | 6.46  | 42 | 1 |
| AOA024RAM2 | Glutaredoxi  | 18.8679245  | 2 | 2 | 2 | 11.8  | 8.09  | 25 | 2 |
| Q6P1M0     | Long-chain   | 4.82115086  | 2 | 2 | 2 | 72    | 8.47  | 26 | 2 |
| P09110     | 3-ketoacyl-  | 4.48113208  | 1 | 1 | 1 | 44.3  | 8.44  | 0  | 1 |
| Q9NPJ8     | NTF2-relat   | 10.5633803  | 2 | 2 | 2 | 16.2  | 5.48  | 41 | 2 |
| Q8IXM3     | 39S riboson  | 10.9489051  | 1 | 1 | 1 | 15.4  | 9.57  | 41 | 1 |
| Q9NX20     | 39S riboson  | 3.98406375  | 1 | 1 | 1 | 28.4  | 10.13 | 0  | 1 |
| A3KN83     | Protein str  | 0.93323762  | 1 | 1 | 1 | 154.2 | 7.88  | 38 | 1 |
| Q8N9N8     | Probable R   | 9.6969697   | 1 | 1 | 1 | 19    | 5.21  | 28 | 1 |

|            |                        |   |   |   |       |       |    |   |
|------------|------------------------|---|---|---|-------|-------|----|---|
| Q7Z5K2     | Wings apart2.26890756  | 2 | 2 | 2 | 132.9 | 5.44  | 42 | 2 |
| P29317     | Ephrin type4.30327869  | 3 | 4 | 3 | 108.2 | 6.23  | 36 | 3 |
| Q5T447     | E3 ubiquiti1.8583043   | 1 | 1 | 1 | 97.1  | 5.64  | 35 | 1 |
| Q96S55     | ATPase WRN13.15789474  | 1 | 1 | 1 | 72.1  | 6.1   | 0  | 1 |
| Q5JSH3     | WD repeat-c 2.6286966  | 2 | 2 | 2 | 101.3 | 5.45  | 0  | 2 |
| AOA024R0Q5 | Protein phc1.57004831  | 1 | 1 | 1 | 89    | 6.81  | 43 | 1 |
| P23229     | Integrin a10.79646018  | 1 | 1 | 1 | 126.5 | 6.61  | 48 | 1 |
| Q9UBU8     | Mortality 13.86740331  | 1 | 1 | 1 | 41.4  | 9.28  | 0  | 1 |
| C9JEH3     | Angio-assoc3.90804598  | 1 | 1 | 1 | 46.8  | 4.42  | 0  | 1 |
| Q8IZH2     | 5'-3' exori0.87924971  | 1 | 1 | 1 | 194   | 7.21  | 34 | 1 |
| Q04206     | Transcriptil.99637024  | 1 | 1 | 1 | 60.2  | 5.68  | 29 | 1 |
| 096028     | Histone-lys1.02564103  | 1 | 1 | 1 | 152.2 | 8.69  | 47 | 1 |
| Q7Z2W9     | 39S riboson10.2439024  | 2 | 2 | 2 | 22.8  | 9.89  | 29 | 2 |
| Q9UBS4     | DnaJ homolc 6.1452514  | 2 | 2 | 2 | 40.5  | 6.18  | 45 | 2 |
| P22570     | NADPH:adrer5.90631365  | 2 | 2 | 2 | 53.8  | 8.44  | 0  | 2 |
| V9HW53     | Dimethylar4.21052632   | 1 | 1 | 1 | 29.6  | 6.01  | 63 | 1 |
| Q9UBV8     | Peflin OS-f3.52112676  | 1 | 1 | 1 | 30.4  | 6.54  | 35 | 1 |
| B5BU36     | Tumor necrc3.86363636  | 1 | 1 | 1 | 47.9  | 5.47  | 47 | 1 |
| Q08499     | cAMP-specifi1.23609394 | 1 | 1 | 1 | 91.1  | 5.54  | 55 | 1 |
| Q92544     | Transmembr2.18068536   | 1 | 1 | 1 | 74.5  | 6.54  | 38 | 1 |
| B2RDT9     | cDNA, FLJ9c8.33333333  | 2 | 2 | 2 | 39.4  | 5.11  | 0  | 2 |
| Q86U86     | Protein poll.06571936  | 1 | 1 | 1 | 192.8 | 6.89  | 0  | 1 |
| O15400     | Syntaxin-7 3.83141762  | 1 | 1 | 1 | 29.8  | 5.55  | 52 | 1 |
| Q9Y6M7     | Sodium bicel.40032949  | 1 | 1 | 1 | 136   | 6.71  | 0  | 1 |
| Q7Z7L1     | Schlafen fe1.55382908  | 1 | 1 | 1 | 102.8 | 7.77  | 32 | 1 |
| Q14118     | Dystroglyce1.67597765  | 1 | 1 | 1 | 97.4  | 8.56  | 38 | 1 |
| J3KMZ8     | Zinc finger2.22222222  | 1 | 1 | 1 | 45.8  | 6.98  | 47 | 1 |
| P28065     | Proteasome 5.02283105  | 1 | 1 | 1 | 23.3  | 5.03  | 0  | 1 |
| Q9Y5B0     | RNA polymer1.87304891  | 1 | 1 | 1 | 104.3 | 5.27  | 0  | 1 |
| Q09472     | Histone acc0.53852527  | 1 | 1 | 1 | 264   | 8.5   | 0  | 1 |
| P57081     | tRNA (guani3.15533981  | 1 | 1 | 1 | 45.5  | 7.11  | 0  | 1 |
| AOA024R1T1 | Ribosomal p9.55882353  | 1 | 1 | 1 | 15.4  | 10.74 | 0  | 1 |
| Q9P206     | Uncharacter1.73913043  | 2 | 2 | 2 | 107   | 9.73  | 0  | 2 |
| Q14473     | Uncharacter10.8571429  | 2 | 2 | 2 | 18.9  | 6.79  | 38 | 2 |
| Q17RY6     | Lymphocyte 6.06060606  | 1 | 1 | 1 | 18.7  | 7.43  | 41 | 1 |
| Q96A26     | Protein FAM14.2857143  | 2 | 2 | 2 | 17.3  | 9.77  | 0  | 2 |
| P50748     | Kinetochore0.67904029  | 1 | 1 | 1 | 250.6 | 5.97  | 27 | 1 |
| AOA024R2K4 | Leucine ric3.63881402  | 2 | 2 | 1 | 84.1  | 6.98  | 23 | 2 |
| O75376     | Nuclear rec1.31147541  | 2 | 2 | 2 | 270   | 7.11  | 0  | 2 |
| Q99700     | Ataxin-2 Oe 1.2185834  | 1 | 1 | 1 | 140.2 | 9.57  | 0  | 1 |
| B2R6D4     | Phosphomanr6.50406504  | 1 | 1 | 1 | 28    | 6.77  | 0  | 1 |
| Q53RX3     | Putative ur5.35714286  | 1 | 1 | 1 | 36.8  | 8.79  | 17 | 1 |
| B2R6A9     | cDNA, FLJ9f1.79856115  | 1 | 1 | 1 | 61.8  | 8.66  | 31 | 1 |
| P52943     | Cysteine-ri7.69230769  | 1 | 1 | 1 | 22.5  | 8.72  | 37 | 1 |
| Q8NCR1     | VPS53 prote 9.375      | 1 | 1 | 1 | 14.3  | 9.74  | 44 | 1 |
| B3KUB6     | cDNA FLJ39f1.42487047  | 1 | 1 | 1 | 86.4  | 5.81  | 17 | 1 |
| Q13888     | General tre2.27848101  | 1 | 1 | 1 | 44.4  | 6.76  | 44 | 1 |
| Q96SB8     | Structural 0.91659028  | 1 | 1 | 1 | 126.2 | 6.99  | 39 | 1 |
| F5GYQ1     | V-type prot2.29591837  | 1 | 1 | 1 | 44.6  | 5.14  | 29 | 1 |
| 095801     | Tetratricof2.84237726  | 1 | 1 | 1 | 44.7  | 5.6   | 33 | 1 |
| B2RBX8     | cDNA, FLJ9f5.34979424  | 1 | 1 | 1 | 28.7  | 8.28  | 33 | 1 |
| J3KNN5     | Probable A1 2.03125    | 1 | 1 | 1 | 71.6  | 7.46  | 28 | 1 |
| Q5F1R6     | DnaJ homolc3.20150659  | 1 | 1 | 1 | 62    | 5.47  | 0  | 1 |
| O15162     | Phospholipi4.08805031  | 1 | 1 | 1 | 35    | 4.94  | 38 | 1 |
| Q86U90     | YrdC domair4.30107527  | 1 | 1 | 1 | 29.3  | 8.57  | 39 | 1 |
| Q9H840     | Gem-associc9.92366412  | 1 | 1 | 1 | 14.5  | 7.4   | 34 | 1 |
| P49406     | 39S riboson3.08219178  | 1 | 1 | 1 | 33.5  | 9.5   | 41 | 1 |
| AOA024RBR3 | Density-reg12.6262626  | 2 | 2 | 2 | 22.1  | 5.3   | 37 | 2 |
| Q6P158     | Putative A11.58730159  | 2 | 2 | 1 | 155.5 | 7.71  | 0  | 2 |
| Q9BQ75     | Protein CMs8.60215054  | 2 | 3 | 2 | 31.9  | 9.19  | 0  | 2 |
| Q59GX2     | Solute caril.93423598  | 1 | 1 | 1 | 57    | 9.47  | 65 | 1 |
| Q99583     | Max-binding1.71821306  | 1 | 1 | 1 | 62.3  | 8.78  | 44 | 1 |
| B4DN86     | cDNA FLJ56l1.26984127  | 1 | 1 | 1 | 101.4 | 5     | 36 | 1 |
| Q5VIR6     | Vacuolar pr 1.7167382  | 1 | 1 | 1 | 79.6  | 6.02  | 29 | 1 |
| 095067     | G2/mitotic- 2.7638191  | 1 | 1 | 1 | 45.3  | 8.9   | 45 | 1 |
| Q9NZ63     | Uncharacter6.92041522  | 2 | 2 | 2 | 33.7  | 6.74  | 0  | 2 |
| Q9GZP4     | PITH domair8.53080569  | 1 | 1 | 1 | 24.2  | 5.74  | 0  | 1 |
| Q53EL1     | Protein KI/1.20274914  | 1 | 1 | 1 | 134.8 | 7.06  | 0  | 1 |
| J3QTA6     | MICOS comp1 5.46875    | 1 | 1 | 1 | 28.8  | 9.44  | 0  | 1 |
| Q8IW90     | MTCH1 prote2.68948655  | 1 | 1 | 1 | 44.6  | 9.09  | 37 | 1 |
| Q9ULI3     | Protein HE(0.94134685  | 1 | 1 | 1 | 147.4 | 6.18  | 38 | 1 |
| Q9GZN8     | UPF0687 prc8.04597701  | 1 | 1 | 1 | 19.3  | 6.84  | 37 | 1 |
| Q9H0P0     | Cytosolic f 5.6547619  | 2 | 2 | 2 | 37.9  | 7.12  | 33 | 2 |

|            |                       |   |   |   |       |       |    |   |
|------------|-----------------------|---|---|---|-------|-------|----|---|
| A9J4F5     | Zinc finger18.5897436 | 1 | 1 | 1 | 17.1  | 10.08 | 0  | 1 |
| Q9UP83     | Conserved c 2.1454112 | 1 | 1 | 1 | 92.7  | 6.6   | 17 | 1 |
| P08069     | Insulin-li1 0.7315289 | 1 | 1 | 1 | 154.7 | 5.8   | 51 | 1 |
| AOA0C4DFW2 | Inhibitor c4.97630332 | 1 | 1 | 1 | 46.8  | 9.13  | 0  | 1 |
| AOA024QZG0 | Ring finger 1.7982018 | 1 | 1 | 1 | 113.6 | 6.29  | 23 | 1 |
| Q99549     | M-phase phc1.62790698 | 1 | 1 | 1 | 97.1  | 6.06  | 0  | 1 |
| P52569     | Cationic an1.67173252 | 1 | 1 | 1 | 71.6  | 7.28  | 0  | 1 |
| B2R694     | Terpene cycl.63934426 | 1 | 1 | 1 | 83.4  | 6.61  | 39 | 1 |
| Q96ES7     | SAGA-associ4.43686007 | 1 | 1 | 1 | 33.2  | 8.1   | 27 | 1 |
| Q56VL3     | OClA domain6.49350649 | 1 | 1 | 1 | 16.9  | 9.03  | 38 | 1 |
| Q6P1N0     | Coiled-coil1.89274448 | 1 | 1 | 1 | 104   | 8.09  | 44 | 1 |
| AOA087WXF8 | Nucleolar r4.94296578 | 1 | 1 | 1 | 29.6  | 9.64  | 18 | 1 |
| X6REB3     | Transcriptil.91458027 | 1 | 1 | 1 | 70    | 6.73  | 19 | 1 |
| Q9Y6K0     | Choline/etf2.64423077 | 1 | 1 | 1 | 46.5  | 8.21  | 20 | 1 |
| Q8IWT6     | Volume-reg2.22222222  | 1 | 1 | 1 | 94.1  | 7.94  | 0  | 1 |
| A8K245     | cDNA FLJ754 5.3030303 | 2 | 2 | 2 | 45.4  | 8.91  | 23 | 2 |
| 000400     | Acetyl-coer3.82513661 | 2 | 2 | 2 | 60.9  | 7.33  | 32 | 2 |
| 076080     | AN1-type z18.45070423 | 1 | 1 | 1 | 23.1  | 8.51  | 48 | 1 |
| Q5VUA4     | Zinc finger 0.7459412 | 1 | 1 | 1 | 251   | 7.2   | 21 | 1 |
| B2RCD8     | cDNA, FLJ943.59589041 | 1 | 1 | 1 | 61.7  | 8.18  | 28 | 1 |
| P82673     | 28S ribosom3.09597523 | 1 | 1 | 1 | 36.8  | 8.24  | 37 | 1 |
| Q6FHF7     | RABGGTA prc3.35097002 | 1 | 1 | 1 | 65    | 5.74  | 0  | 1 |
| AOA024QZ09 | OTU domain 2.97723292 | 1 | 1 | 1 | 60.6  | 6.54  | 0  | 1 |
| P52735     | Guanine nuc2.84738041 | 2 | 2 | 2 | 101.2 | 7.08  | 28 | 2 |
| Q9BTV4     | Transmembr5           | 2 | 2 | 2 | 44.8  | 8.13  | 27 | 2 |
| Q6NZY4     | Zinc finger1.69731259 | 1 | 1 | 1 | 78.5  | 4.87  | 33 | 1 |
| Q92466     | DNA damage-2.10772834 | 1 | 1 | 1 | 47.8  | 9.47  | 30 | 1 |
| Q9H223     | EH domain-c2.95748614 | 2 | 3 | 1 | 61.1  | 6.76  | 50 | 2 |
| 095070     | Protein YII4.09556314 | 1 | 1 | 1 | 32    | 8.95  | 43 | 1 |
| Q9BVS5     | tRNA (adeni2.93501048 | 1 | 1 | 1 | 52.9  | 6.62  | 28 | 1 |
| AOA0S2Z4U0 | Ras and Raf1.53256705 | 1 | 1 | 1 | 84    | 8.02  | 0  | 1 |
| Q7Z2Z2     | Elongation 0.80357143 | 1 | 1 | 1 | 125.4 | 5.91  | 28 | 1 |
| F5H0C4     | Proteasomal3.05343511 | 1 | 1 | 1 | 42.7  | 6.16  | 34 | 1 |
| Q96ME7     | Zinc finger 2.4691358 | 1 | 1 | 1 | 64.6  | 9.76  | 26 | 1 |
| Q9UI26     | Importin-111.02564103 | 1 | 1 | 1 | 112.5 | 5.25  | 0  | 1 |
| AOA024R7I0 | GIPC PDZ dc 4.5045045 | 1 | 1 | 1 | 36    | 6.28  | 0  | 1 |
| Q9H3G5     | Probable sc1.68067227 | 1 | 1 | 1 | 54.1  | 5.62  | 52 | 1 |
| A6NMQ1     | DNA polymer1.08991826 | 2 | 2 | 2 | 166.4 | 5.81  | 0  | 2 |
| Q6FIB4     | F11 receptc3.34448161 | 1 | 1 | 1 | 32.6  | 7.9   | 27 | 1 |
| P41440     | Folate trar1.69204738 | 1 | 1 | 1 | 64.8  | 8.95  | 35 | 1 |
| Q02040     | A-kinase ar2.01438849 | 2 | 2 | 1 | 80.7  | 9.73  | 58 | 2 |
| Q8TA86     | Retinitis r6.78733032 | 1 | 1 | 1 | 26.1  | 9.79  | 30 | 1 |
| 075935     | Dynactin st 6.4516129 | 1 | 1 | 1 | 21.1  | 5.47  | 0  | 1 |
| P04731     | Metallothi45.9016393  | 2 | 2 | 1 | 6.1   | 7.96  | 0  | 2 |
| Q16763     | Ubiquitin-c6.75675676 | 1 | 1 | 1 | 23.8  | 8.38  | 25 | 1 |
| Q9Y5U2     | Protein TSc3.95136778 | 1 | 1 | 1 | 34.3  | 5.19  | 0  | 1 |
| AOA140VKC8 | Testis tiss3.73831776 | 1 | 1 | 1 | 35.9  | 6.6   | 0  | 1 |
| 095139     | NADH dehyd 7.8125     | 1 | 1 | 1 | 15.5  | 9.63  | 30 | 1 |
| AOA0S2Z462 | ArFGAP witl1.82724252 | 1 | 1 | 1 | 62.6  | 8.56  | 45 | 1 |
| Q96CW5     | Gamma-tubul 1.323043  | 1 | 1 | 1 | 103.5 | 8.12  | 0  | 1 |
| Q8WXD5     | Gem-associ7.78443114  | 1 | 1 | 1 | 18.8  | 5.12  | 0  | 1 |
| P29590     | Protein PMI1.13378685 | 1 | 1 | 1 | 97.5  | 6.21  | 25 | 1 |
| Q9H9Q2     | COP9 signal 5.3030303 | 1 | 1 | 1 | 29.6  | 6.15  | 0  | 1 |
| AOA024R8D4 | Mitochondri5.32915361 | 2 | 2 | 2 | 35.5  | 8.94  | 42 | 2 |
| Q9Y6G5     | COMM domain4.45544554 | 1 | 1 | 1 | 23    | 6.54  | 49 | 1 |
| Q7Z7K0     | COX assembl9.43396226 | 1 | 1 | 1 | 12.5  | 8.63  | 37 | 1 |
| Q9GZS1     | DNA-directe1.66320166 | 1 | 1 | 1 | 53.9  | 8.56  | 39 | 1 |
| P56378     | 6.8 kDa mit32.7586207 | 2 | 2 | 2 | 6.7   | 10.08 | 19 | 2 |
| Q8NFW8     | N-acylneur3.4562212   | 1 | 1 | 1 | 48.3  | 7.93  | 18 | 1 |
| Q99959     | Plakophilin1.92962543 | 2 | 2 | 1 | 97.4  | 9.33  | 44 | 2 |
| Q96DX5     | Ankyrin ref5.78231293 | 1 | 1 | 1 | 31.8  | 6.98  | 0  | 1 |
| Q9P031     | Thyroid tr4.14937759  | 1 | 1 | 1 | 28.7  | 9.88  | 39 | 1 |
| Q9NUL5     | Repressor c3.78006873 | 1 | 1 | 1 | 33.1  | 7.25  | 47 | 1 |
| 095630     | STAM-bindir3.06603774 | 1 | 1 | 1 | 48    | 6.29  | 0  | 1 |
| Q8NB49     | Phospholipil.67844523 | 1 | 1 | 1 | 129.4 | 6.67  | 0  | 1 |
| 095602     | DNA-directe2.15116279 | 2 | 3 | 2 | 194.7 | 7.03  | 27 | 2 |
| Q6PID6     | Tetratricof4.58015267 | 1 | 1 | 1 | 29.4  | 5.44  | 0  | 1 |
| Q6IQ49     | Protein SDE3.54767184 | 1 | 1 | 1 | 49.7  | 6.05  | 0  | 1 |
| Q8NFC6     | Biorientatio.52441822 | 1 | 1 | 1 | 330.3 | 5.08  | 36 | 1 |
| P61009     | Signal pept 5         | 1 | 1 | 1 | 20.3  | 8.62  | 36 | 1 |
| Q8WZ82     | Esterase O15.72687225 | 1 | 1 | 1 | 24.4  | 6.89  | 52 | 1 |
| AOA140VJT2 | Testicular 5.53505535 | 1 | 1 | 1 | 29.8  | 5.74  | 0  | 1 |
| Q9H7N4     | Splicing f20.83841463 | 1 | 1 | 1 | 139.2 | 9.25  | 26 | 1 |

|            |                                                            |            |   |   |   |       |       |    |   |
|------------|------------------------------------------------------------|------------|---|---|---|-------|-------|----|---|
| Q9NW81     | ATP synthase                                               | 4.6692607  | 1 | 1 | 1 | 29.2  | 6.43  | 36 | 1 |
| Q15036     | Sorting nexin 2                                            | 3.34042553 | 1 | 1 | 1 | 52.9  | 7.46  | 40 | 1 |
| A6NGJ0     | Dynein light chain 6                                       | 5.57894737 | 1 | 1 | 1 | 17    | 5.92  | 23 | 1 |
| O60563     | Cyclin-T1 (C1)                                             | 3.71900826 | 2 | 2 | 2 | 80.6  | 8.78  | 0  | 2 |
| Q2L6I0     | FB19 protein                                               | 1.70212766 | 1 | 1 | 1 | 99    | 9.17  | 0  | 1 |
| D3DSY9     | Farnesyltransferase 2                                      | 1.18818381 | 1 | 1 | 1 | 52.6  | 5.57  | 29 | 1 |
| O75787     | Renin receptor 3                                           | 3.71428571 | 1 | 1 | 1 | 39    | 6.1   | 0  | 1 |
| Q96JM3     | Chromosome 2                                               | 2.5862069  | 2 | 2 | 2 | 89    | 8.44  | 0  | 2 |
| Q8TF05     | Serine/threonine phosphatase 0                             | 0.84210526 | 1 | 1 | 1 | 106.9 | 4.77  | 59 | 1 |
| Q9BTU6     | Phosphatidylserine phosphatase 2                           | 2.71398747 | 1 | 1 | 1 | 54    | 8.29  | 33 | 1 |
| AOA140VK84 | Fructosaminidase 3                                         | 3.88349515 | 1 | 1 | 1 | 34.4  | 7.33  | 0  | 1 |
| Q8IVM0     | Coiled-coil protein 3                                      | 3.92156863 | 1 | 1 | 1 | 35.8  | 6.65  | 40 | 1 |
| Q9NPE3     | H/ACA ribonucleoprotein 3                                  | 45.3125    | 2 | 3 | 2 | 7.7   | 9.99  | 24 | 2 |
| Q96DA6     | Mitochondrial ribonucleoprotein 12                         | 0.0689655  | 1 | 1 | 1 | 12.5  | 10.1  | 32 | 1 |
| O15321     | Transmembrane protein 1                                    | 1.81518152 | 1 | 1 | 1 | 68.8  | 7.17  | 0  | 1 |
| AOA0AOMQR2 | Protein RTF3                                               | 3.57142857 | 1 | 1 | 1 | 37.5  | 8.44  | 24 | 1 |
| P05161     | Ubiquitin-15                                               | 4.45454545 | 1 | 1 | 1 | 17.9  | 7.44  | 30 | 1 |
| Q9NRN7     | L-aminoadipate lyase 4                                     | 4.85436893 | 1 | 1 | 1 | 35.8  | 6.8   | 0  | 1 |
| O95059     | Ribonucleoprotein 12                                       | 1.9032258  | 1 | 1 | 1 | 13.7  | 7.75  | 33 | 1 |
| AOA0A6YY96 | Iron-responsive element binding protein 1                  | 1.76531672 | 1 | 1 | 1 | 105   | 7.05  | 0  | 1 |
| Q8IXQ3     | Uncharacterized protein 6                                  | 1.18556701 | 1 | 1 | 1 | 21.1  | 5.01  | 40 | 1 |
| O95825     | Quinone oxidoreductase 3                                   | 3.43839542 | 1 | 1 | 1 | 38.7  | 5.78  | 0  | 1 |
| P49753     | Acyl-coenzyme A oxidoreductase 2                           | 2.27743271 | 1 | 1 | 1 | 53.2  | 8.47  | 0  | 1 |
| Q9NQS7     | Inner centrin 1                                            | 1.96078431 | 1 | 1 | 1 | 105.4 | 9.44  | 0  | 1 |
| Q6P1M3     | Lethal (2) protein 1                                       | 1.66666667 | 1 | 1 | 1 | 113.4 | 7.52  | 27 | 1 |
| Q9BVL2     | Nucleoporin 1                                              | 1.33555927 | 1 | 1 | 1 | 60.9  | 9.33  | 0  | 1 |
| O43660     | Pleiotropic protein 1                                      | 1.55642023 | 1 | 1 | 1 | 57.2  | 9.17  | 32 | 1 |
| O14562     | Ubiquitin c1                                               | 1.2977346  | 1 | 2 | 1 | 33.4  | 5.77  | 0  | 1 |
| P16298     | Serine/threonine phosphatase 2                             | 2.29007634 | 1 | 1 | 1 | 59    | 5.91  | 34 | 1 |
| P01833     | Polymeric protein 2                                        | 1.09424084 | 1 | 1 | 1 | 83.2  | 5.74  | 63 | 1 |
| Q643R3     | Lysophosphatidyltransferase 5                              | 1.15267176 | 1 | 1 | 1 | 57.2  | 8.97  | 0  | 1 |
| P61165     | Transmembrane protein 10                                   | 1.1265823  | 1 | 1 | 1 | 9.1   | 5.83  | 45 | 1 |
| F5GWE5     | Phosphatidylserine phosphatase 7                           | 0.03703704 | 2 | 2 | 2 | 31.8  | 6.55  | 0  | 2 |
| B2R6J3     | cDNA, FLJ92666                                             | 6.4        | 1 | 1 | 1 | 27.3  | 8.6   | 19 | 1 |
| Q96K76     | Ubiquitin c1                                               | 1.45454545 | 2 | 2 | 2 | 157.2 | 5.08  | 40 | 2 |
| Q7Z4X0     | MO25-like protein 3                                        | 3.81231672 | 2 | 2 | 2 | 39.7  | 7.47  | 0  | 2 |
| AOA024R7X0 | ADP-ribosyltransferase 10                                  | 0.43266631 | 1 | 1 | 1 | 208.6 | 5.85  | 0  | 1 |
| AOA024R6A5 | Protein phosphatase 5                                      | 5.23560209 | 2 | 2 | 2 | 42.4  | 5.36  | 25 | 2 |
| Q14676     | Mediator of RNA polymerase II transcription 4              | 0.43082815 | 1 | 1 | 1 | 226.5 | 5.47  | 32 | 1 |
| Q9BQG2     | Peroxisomal protein 1                                      | 1.73160173 | 1 | 1 | 1 | 52    | 6.83  | 38 | 1 |
| Q9NTX5     | Ethylmalonate lyase 3                                      | 3.58306189 | 1 | 1 | 1 | 33.7  | 8.21  | 0  | 1 |
| B2R6K1     | cDNA, FLJ92666                                             | 2.13333333 | 1 | 1 | 1 | 83    | 7.06  | 0  | 1 |
| Q9HD20     | Manganese-dependent protein 2                              | 1.65780731 | 1 | 1 | 1 | 132.9 | 8.13  | 0  | 1 |
| Q9H8M5     | Metalloproteinase 1                                        | 1.82857143 | 1 | 1 | 1 | 96.6  | 6.38  | 34 | 1 |
| O95178     | NADH dehydrogenase 8                                       | 5.57142857 | 1 | 1 | 1 | 12.1  | 5.74  | 27 | 1 |
| O75394     | 39S ribosomal protein L16                                  | 1.9230769  | 1 | 1 | 1 | 7.6   | 10.8  | 0  | 1 |
| Q9NRY2     | SOS domain-containing protein 11                           | 1.5384615  | 1 | 1 | 1 | 11.4  | 9.25  | 30 | 1 |
| Q9POM9     | 39S ribosomal protein L10                                  | 1.1351351  | 1 | 1 | 1 | 16.1  | 10.42 | 0  | 1 |
| P43356     | Melanoma-associated protein 4                              | 1.14012739 | 1 | 1 | 1 | 35    | 4.72  | 45 | 1 |
| Q02127     | Dihydroorotase 3                                           | 3.29113924 | 1 | 1 | 1 | 42.8  | 9.67  | 0  | 1 |
| Q9BUN8     | Derlin-1 protein 3                                         | 3.187251   | 1 | 1 | 1 | 28.8  | 9.51  | 46 | 1 |
| Q5JSK9     | High mobility group protein 5                              | 1.97014925 | 1 | 1 | 1 | 22.4  | 4.58  | 0  | 1 |
| Q7L5L3     | Glycerophosphoryl transferase 4                            | 4.40251572 | 1 | 1 | 1 | 36.6  | 7.97  | 0  | 1 |
| Q8WUY1     | Protein THE3                                               | 3.84615385 | 1 | 1 | 1 | 23.9  | 9.55  | 48 | 1 |
| Q32Q10     | RSU1 protein 5                                             | 5.71428571 | 1 | 1 | 1 | 31.3  | 9.09  | 0  | 1 |
| J3KPD3     | RNA binding protein 11                                     | 1.6104869  | 1 | 2 | 1 | 30.6  | 9.57  | 0  | 1 |
| Q6IA86     | Elongator complex subunit 1                                | 1.57384988 | 1 | 1 | 1 | 92.4  | 5.96  | 33 | 1 |
| Q8N128     | Protein FAH4                                               | 4.69483568 | 1 | 1 | 1 | 23.7  | 4.45  | 42 | 1 |
| AOA024R7N7 | Interferon-gamma receptor 4                                | 4.4        | 1 | 1 | 1 | 27.9  | 4.88  | 18 | 1 |
| O75165     | DnaJ homologous protein 0                                  | 0.8470798  | 1 | 1 | 1 | 254.3 | 6.74  | 0  | 1 |
| P42695     | Condensin I subunit 1                                      | 1.33511348 | 1 | 1 | 1 | 168.8 | 7.5   | 0  | 1 |
| B2RDV7     | tRNA-dihydroxyacetone phosphatase 2                        | 2.76923077 | 1 | 1 | 1 | 72.6  | 8.05  | 0  | 1 |
| Q9NVU7     | Protein SD1                                                | 1.01892285 | 1 | 1 | 1 | 79.8  | 9.25  | 35 | 1 |
| AOA024R5U5 | ADAM metallopeptidase with thrombospondin type 1 motifs 13 | 3.87700535 | 2 | 2 | 2 | 84.1  | 7.77  | 0  | 2 |
| Q8NE01     | Metalloproteinase 2                                        | 2.54596888 | 1 | 1 | 1 | 76.1  | 6.09  | 0  | 1 |
| Q53FH6     | Mitogen-activated protein kinase 18                        | 1.5483871  | 1 | 1 | 1 | 13.6  | 7.34  | 0  | 1 |
| Q9H6T0     | Epithelial cell adhesion molecule 1                        | 1.5130674  | 1 | 1 | 1 | 78.4  | 6.71  | 0  | 1 |
| O94913     | Pre-mRNA cleavage factor 0                                 | 0.7073955  | 1 | 1 | 1 | 172.9 | 8.48  | 0  | 1 |
| P57678     | Gem-association factor 1                                   | 1.03969754 | 1 | 1 | 1 | 120   | 6.04  | 30 | 1 |
| Q9NQ50     | 39S ribosomal protein L3                                   | 4.36893204 | 1 | 1 | 1 | 24.5  | 9.63  | 32 | 1 |
| B2R6I5     | cDNA, FLJ92666                                             | 5.0955414  | 1 | 1 | 1 | 17.4  | 5.12  | 42 | 1 |
| P49593     | Protein phosphatase 4                                      | 4.40528634 | 1 | 1 | 1 | 49.8  | 5.1   | 0  | 1 |
| Q53H10     | Postreplicative DNA damage checkpoint protein 2            | 2.42424242 | 1 | 1 | 1 | 56.2  | 7.59  | 29 | 1 |

|            |              |             |   |   |   |       |       |    |   |
|------------|--------------|-------------|---|---|---|-------|-------|----|---|
| P29372     | DNA-3-methyl | 6.04026846  | 1 | 1 | 1 | 32.8  | 9.57  | 0  | 1 |
| Q6NXG4     | WDR13 prote  | 2.24299065  | 1 | 1 | 1 | 58.7  | 9.19  | 0  | 1 |
| P17152     | Transmembr   | 5.20833333  | 1 | 1 | 1 | 21.5  | 7.36  | 26 | 1 |
| Q9Y5V0     | Zinc finger  | 11.8421053  | 1 | 1 | 1 | 8.5   | 10.01 | 22 | 1 |
| P78537     | Biogenesis   | 7.18954248  | 1 | 1 | 1 | 17.3  | 9.33  | 25 | 1 |
| Q9UPT5     | Exocyst con  | 1.36054422  | 1 | 1 | 1 | 83.3  | 6.79  | 45 | 1 |
| Q8TCD5     | 5' (3')-deo  | 6.46766169  | 1 | 1 | 1 | 23.4  | 6.64  | 23 | 1 |
| Q9BTZ2     | Dehydrogen   | 5.03597122  | 1 | 1 | 1 | 29.5  | 8.56  | 0  | 1 |
| E9PLP0     | Cysteine--t  | 8.59375     | 1 | 1 | 1 | 14.3  | 9.13  | 0  | 1 |
| Q9NWB6     | Arginine ar  | 5.12820513  | 2 | 2 | 2 | 33.2  | 10.35 | 50 | 2 |
| Q96BP2     | Coiled-coil  | 12.7118644  | 1 | 1 | 1 | 13.5  | 10.21 | 0  | 1 |
| P22670     | MHC class    | 12.86006129 | 1 | 3 | 1 | 104.7 | 6.29  | 0  | 1 |
| Q96I51     | RCC1-like    | (2.80172414 | 1 | 1 | 1 | 50    | 8.4   | 0  | 1 |
| P28290     | Sperm-speci  | 1.03256553  | 1 | 1 | 1 | 138.3 | 5.19  | 0  | 1 |
| P49137     | MAP kinase-  | 5           | 2 | 2 | 2 | 45.5  | 8.68  | 0  | 2 |
| J3KN01     | Afadin OS=   | 0.54614965  | 1 | 1 | 1 | 207.5 | 6.37  | 0  | 1 |
| AOA0J9YWLO | Absent in n  | 0.56311591  | 1 | 1 | 1 | 231.6 | 5.81  | 0  | 1 |
| Q8NBX0     | Saccharopir  | 3.03030303  | 1 | 1 | 1 | 47.1  | 9.14  | 0  | 1 |
| P11117     | Lysosomal    | 2.60047281  | 1 | 1 | 1 | 48.3  | 6.74  | 38 | 1 |
| Q14807     | Kinesin-li   | 2.55639098  | 1 | 1 | 1 | 73.2  | 9.45  | 0  | 1 |
| 060930     | Ribonuclea   | 6.29370629  | 1 | 1 | 1 | 32    | 9.16  | 0  | 1 |
| B2RD10     | cDNA, FLJ9   | 2.63157895  | 1 | 1 | 1 | 68.4  | 7.65  | 28 | 1 |
| Q53EY9     | F-box only   | 2.48138958  | 1 | 1 | 1 | 44.5  | 7.03  | 25 | 1 |
| 075880     | Protein SC   | 7.97342193  | 2 | 2 | 2 | 33.8  | 8.88  | 28 | 2 |
| AOA0S2Z5P2 | GINS comple  | 3.1372549   | 1 | 1 | 1 | 28.8  | 5.24  | 35 | 1 |
| Q8TBF4     | Zinc finger  | 7.37327189  | 1 | 1 | 1 | 24.6  | 8.53  | 0  | 1 |
| Q06124     | Tyrosine-p   | 1.67504188  | 1 | 1 | 1 | 68.4  | 7.3   | 35 | 1 |
| Q8NI08     | Nuclear rec  | 1.80467091  | 1 | 1 | 1 | 106.1 | 5.59  | 35 | 1 |
| Q99807     | 5-demethox   | 5.06912442  | 1 | 1 | 1 | 24.3  | 8.59  | 36 | 1 |
| Q15648     | Mediator of  | 1.45477546  | 2 | 2 | 2 | 168.4 | 8.73  | 0  | 2 |
| B3KRV2     | cDNA FLJ34   | 3.125       | 1 | 1 | 1 | 47.3  | 9.7   | 0  | 1 |
| 014618     | Copper char  | 7.29927007  | 1 | 1 | 1 | 29    | 5.58  | 0  | 1 |
| Q96GS4     | BLOC-1-rel   | 4.20168067  | 1 | 1 | 1 | 37.2  | 5.76  | 23 | 1 |
| Q9Y5B6     | PAX3- and    | 1.19956379  | 1 | 1 | 1 | 104.7 | 5.68  | 0  | 1 |
| Q86Y13     | E3 ubiquiti  | 1.1589404   | 1 | 2 | 1 | 138.5 | 6.87  | 0  | 1 |
| Q92575     | UBX domain   | 1.77165354  | 1 | 1 | 1 | 56.7  | 6.38  | 20 | 1 |
| Q12846     | Syntaxin-4   | 3.03030303  | 1 | 1 | 1 | 34.2  | 6.28  | 33 | 1 |
| Q8IZQ5     | Selenoprot   | 10.6557377  | 1 | 1 | 1 | 13.4  | 9.74  | 25 | 1 |
| Q9H9B1     | Histone-lys  | 1.15562404  | 1 | 1 | 1 | 141.4 | 5.76  | 0  | 1 |
| 095487     | Protein tra  | 1.10410095  | 1 | 1 | 1 | 137.3 | 6.67  | 47 | 1 |
| Q9BZD4     | Kinetochor   | 4.74137931  | 2 | 2 | 2 | 54.3  | 8.27  | 0  | 2 |
| A5YM53     | ITGAV prot   | 1.04961832  | 1 | 1 | 1 | 116   | 5.74  | 36 | 1 |
| 075818     | Ribonuclea   | 2.47933884  | 1 | 1 | 1 | 41.8  | 6.67  | 0  | 1 |
| AOA024R915 | Acyl-Coenz   | 4.96453901  | 1 | 1 | 1 | 31.1  | 5.11  | 0  | 1 |
| Q86YZ3     | Hornerin O   | 2.73684211  | 1 | 1 | 1 | 282.2 | 10.04 | 0  | 1 |
| Q9Y3D6     | Mitochondri  | 15.7894737  | 2 | 2 | 2 | 16.9  | 8.79  | 18 | 2 |
| AOA087WZM2 | Ribonuclea   | 5.22875817  | 1 | 1 | 1 | 34.9  | 7.11  | 25 | 1 |
| AOA087X080 | Ryanodine    | 10.28729735 | 2 | 2 | 1 | 552.1 | 5.69  | 28 | 2 |
| Q8TAA9     | Vang-like    | 1.05343511  | 1 | 1 | 1 | 59.9  | 8.81  | 27 | 1 |
| 075054     | Immunoglob   | 0.83752094  | 1 | 1 | 1 | 135.1 | 6.07  | 32 | 1 |
| Q9Y221     | 60S riboso   | 10.5555556  | 1 | 1 | 1 | 20.4  | 8.51  | 0  | 1 |
| Q15386     | Ubiquitin-r  | 1.10803324  | 1 | 1 | 1 | 123.8 | 6.71  | 0  | 1 |
| Q16740     | ATP-depend   | 3.97111913  | 1 | 1 | 1 | 30.2  | 8.09  | 0  | 1 |
| AOA024RDX4 | ATP-depend   | 3.07692308  | 1 | 1 | 1 | 41.3  | 9.1   | 0  | 1 |
| Q99650     | Oncostatin   | -1.12359551 | 1 | 1 | 1 | 110.4 | 5.82  | 27 | 1 |
| Q9Y3C8     | Ubiquitin-f  | 5.38922156  | 1 | 2 | 1 | 19.4  | 7.4   | 54 | 1 |
| Q7Z5G4     | Golgin sub   | 18.02919708 | 1 | 1 | 1 | 15.8  | 7.05  | 0  | 1 |
| Q9Y3Q3     | Transmembr   | 4.60829493  | 1 | 1 | 1 | 24.8  | 5.6   | 22 | 1 |
| Q9NZE8     | 39S riboso   | 4.78723404  | 1 | 1 | 1 | 21.5  | 11.3  | 26 | 1 |
| Q6IAA8     | Regulator    | 1.45341615  | 1 | 1 | 1 | 17.7  | 5.15  | 19 | 1 |
| B8ZZC8     | Methyltran   | 4.50819672  | 1 | 1 | 1 | 27.8  | 8.22  | 0  | 1 |
| Q9Y6A4     | Cilia- and   | 6.21761658  | 1 | 1 | 1 | 22.8  | 9.76  | 0  | 1 |
| A4D213     | DKFZP586J    | 0.41528239  | 1 | 1 | 1 | 266.5 | 6.73  | 0  | 1 |
| Q13395     | Probable m   | 0.8636644   | 1 | 1 | 1 | 181.6 | 7.05  | 27 | 1 |
| MOR2Z9     | SURP and G   | -0.63868613 | 1 | 1 | 1 | 121.5 | 7.4   | 41 | 1 |
| Q8NC56     | LEM domain   | -2.98210736 | 1 | 1 | 1 | 56.9  | 9     | 0  | 1 |
| Q9Y2R0     | Cytochrome   | 9.43396226  | 1 | 1 | 1 | 11.7  | 9.6   | 34 | 1 |
| Q9H6H4     | Receptor ex  | 8.94941634  | 1 | 1 | 1 | 29.4  | 9.73  | 0  | 1 |
| P47224     | Guanine nuc  | 8.94308943  | 1 | 1 | 1 | 13.8  | 5.52  | 20 | 1 |
| Q9NX40     | OCIA domai   | 4.89795918  | 1 | 1 | 1 | 27.6  | 7.49  | 30 | 1 |
| MOQXF9     | Branched-cl  | 3.59550562  | 1 | 1 | 1 | 49.9  | 7.46  | 0  | 1 |
| H7C1N3     | BET1 homol   | 8.27067669  | 1 | 1 | 1 | 15    | 8.28  | 0  | 1 |
| Q8TAE8     | Growth arr   | 9.00900901  | 1 | 1 | 1 | 25.4  | 10.02 | 0  | 1 |

|            |                        |   |   |   |       |       |    |   |
|------------|------------------------|---|---|---|-------|-------|----|---|
| 095833     | Chloride ir6.77966102  | 1 | 1 | 1 | 26.6  | 6.43  | 0  | 1 |
| Q13627     | Dual speci0.91743119   | 1 | 1 | 1 | 85.5  | 8.75  | 0  | 1 |
| P78345     | Ribonuclea2.82685512   | 1 | 1 | 1 | 31.8  | 9.92  | 35 | 1 |
| P38935     | DNA-binding1.71198389  | 1 | 1 | 1 | 109.1 | 8.97  | 0  | 1 |
| Q8NC42     | E3 ubiquiti 3          | 1 | 1 | 1 | 43.1  | 6.54  | 21 | 1 |
| Q8N4C8     | Misshapen-1 1.5015015  | 2 | 2 | 1 | 149.7 | 7.85  | 39 | 2 |
| P49427     | Ubiquitin-c2.96610169  | 1 | 1 | 1 | 26.7  | 4.54  | 42 | 1 |
| Q9NX62     | Inositol mc2.78551532  | 1 | 1 | 1 | 38.7  | 6.86  | 23 | 1 |
| B3KNT3     | Steroid rec4.21940928  | 1 | 1 | 1 | 25.8  | 7.46  | 30 | 1 |
| P36404     | ADP-ribosyl5.43478261  | 1 | 1 | 1 | 20.9  | 6.34  | 0  | 1 |
| P18084     | Integrin bc2.25281602  | 1 | 1 | 1 | 88    | 6.06  | 0  | 1 |
| Q687X5     | Metallored2.17864924   | 1 | 1 | 1 | 51.9  | 9.29  | 0  | 1 |
| Q8IUI8     | Cytokine rc4.07239819  | 1 | 1 | 1 | 49.7  | 5.14  | 0  | 1 |
| 015397     | Importin-8 1.92864031  | 2 | 2 | 2 | 119.9 | 5.16  | 29 | 2 |
| 060504     | Vinexin OS= 4.3219076  | 1 | 3 | 1 | 75.3  | 9.45  | 0  | 1 |
| MOQZD8     | Uncharacter0.58805323  | 1 | 1 | 1 | 354   | 7.88  | 0  | 1 |
| 095140     | Mitofusin-1.84940555   | 2 | 2 | 2 | 86.3  | 6.98  | 32 | 2 |
| Q6FI91     | TSPYL protc1.82648402  | 1 | 1 | 1 | 49.3  | 5.6   | 0  | 1 |
| AOA090N8E9 | Enhancer of2.39680426  | 1 | 1 | 1 | 86    | 7.21  | 0  | 1 |
| Q96KG9     | N-terminal 1.36138614  | 1 | 1 | 1 | 89.6  | 6.3   | 28 | 1 |
| 043709     | Probable f4.27046263   | 2 | 2 | 2 | 31.9  | 8.73  | 0  | 2 |
| Q658Y4     | Protein FA1.07398568   | 1 | 1 | 1 | 93.9  | 6.39  | 26 | 1 |
| 060344     | Endothelin-2.26500566  | 1 | 1 | 1 | 99.7  | 5.1   | 0  | 1 |
| Q9UIC8     | Leucine car3.29341317  | 1 | 1 | 1 | 38.4  | 6.04  | 0  | 1 |
| Q9Y2U8     | Inner nuclc1.09769484  | 1 | 1 | 1 | 99.9  | 7.55  | 38 | 1 |
| Q13217     | DnaJ homolc1.58730159  | 1 | 1 | 1 | 57.5  | 6.15  | 17 | 1 |
| AOA024RCB2 | Mitochondri6.53594771  | 1 | 1 | 1 | 17.8  | 9.69  | 0  | 1 |
| Q9Y446     | Plakophilin2.38393977  | 1 | 1 | 1 | 87    | 9.32  | 0  | 1 |
| Q9H3S7     | Tyrosine-p1.28361858   | 1 | 1 | 1 | 178.9 | 6.92  | 0  | 1 |
| 014684     | Prostagland7.89473684  | 1 | 1 | 1 | 17.1  | 9.5   | 0  | 1 |
| Q9UI12     | V-type prot3.10559006  | 1 | 1 | 1 | 55.8  | 6.48  | 0  | 1 |
| AOA0S2Z652 | Component c1.16883117  | 1 | 1 | 1 | 86.3  | 5.47  | 44 | 1 |
| P13498     | Cytochrome 5.12820513  | 1 | 1 | 1 | 21    | 9.54  | 38 | 1 |
| G3V3D1     | Epididymal 4.07239819  | 1 | 1 | 1 | 23.7  | 6.73  | 24 | 1 |
| 014686     | Histone-lyc0.14448257  | 1 | 2 | 1 | 593   | 5.58  | 0  | 1 |
| Q9C040     | Tripartite 0.94086022  | 1 | 1 | 1 | 81.5  | 6.96  | 0  | 1 |
| P06746     | DNA polymer2.98507463  | 1 | 1 | 1 | 38.2  | 8.95  | 0  | 1 |
| Q13485     | Mothers agc1.63043478  | 1 | 1 | 1 | 60.4  | 6.99  | 0  | 1 |
| Q9P021     | Cysteine-ri16.8316832  | 1 | 1 | 1 | 11.2  | 9.47  | 0  | 1 |
| Q9NRG0     | Chromatin z6.10687023  | 1 | 2 | 1 | 14.7  | 5.1   | 34 | 1 |
| Q0D2I6     | Fasciculati2.54957507  | 1 | 1 | 1 | 39.5  | 4.59  | 0  | 1 |
| Q4U2R6     | 39S ribosom 7.03125    | 1 | 1 | 1 | 15.1  | 11.27 | 0  | 1 |
| Q8WZA0     | Protein LZ113.6842105  | 1 | 1 | 1 | 21.5  | 4.94  | 0  | 1 |
| AOA087WYL5 | Seizure 6-11.08342362  | 1 | 1 | 1 | 99.1  | 4.87  | 20 | 1 |
| S4R347     | Formin-bincl.47783251  | 1 | 1 | 1 | 70.5  | 6.64  | 27 | 1 |
| Q08AD1     | Calmodulin-0.53727334  | 1 | 1 | 1 | 168   | 6.8   | 25 | 1 |
| Q9P253     | Vacuolar pi0.71942446  | 1 | 1 | 1 | 110.1 | 6.07  | 43 | 1 |
| Q6PJ69     | Tripartite 3.86847195  | 1 | 1 | 1 | 57.3  | 6.7   | 23 | 1 |
| Q9Y4K0     | Lysyl oxide2.19638243  | 1 | 1 | 1 | 86.7  | 6.38  | 0  | 1 |
| 095562     | Vesicle tra 6.25       | 1 | 1 | 1 | 17.8  | 9.13  | 30 | 1 |
| AOA0G2JPP5 | Protein sc0.96676737   | 2 | 2 | 2 | 177.6 | 5.1   | 0  | 2 |
| B5MDU6     | Lipid drop1 2.7027027  | 1 | 1 | 1 | 42.6  | 6.93  | 26 | 1 |
| 095633     | Follistatin6.84410646  | 1 | 1 | 1 | 27.6  | 6.77  | 22 | 1 |
| Q9UNZ5     | Leydig cell17.07070707 | 1 | 2 | 1 | 10.6  | 11.55 | 39 | 1 |
| K7EMV4     | Transcripti 15         | 1 | 1 | 1 | 13.3  | 8.85  | 0  | 1 |
| AOA087WZK0 | Deoxyhypusi5.13513514  | 1 | 1 | 1 | 41.1  | 5.47  | 0  | 1 |
| B4DV82     | Poly [ADP-r4.37956204  | 2 | 2 | 2 | 46.9  | 8.73  | 0  | 2 |
| AOA024RAC0 | Leucine zip1.76579926  | 1 | 2 | 1 | 120.2 | 8.63  | 0  | 1 |
| B2RBM1     | cDNA, FLJ9f2.48538012  | 2 | 2 | 1 | 76.4  | 4.93  | 42 | 2 |
| P23786     | Carnitine (1.51975684  | 1 | 1 | 1 | 73.7  | 8.18  | 24 | 1 |
| Q5VTR2     | E3 ubiquiti1.43589744  | 1 | 1 | 1 | 113.6 | 5.94  | 28 | 1 |
| Q8TDH9     | Biogenesis 5.34759358  | 1 | 1 | 1 | 21.6  | 7.59  | 0  | 1 |
| B3KY32     | cDNA FLJ461.96078431   | 1 | 1 | 1 | 46.1  | 8     | 0  | 1 |
| 000411     | DNA-directc0.89430894  | 1 | 1 | 1 | 138.5 | 8.98  | 28 | 1 |
| Q13444     | Disintegrin1.85399768  | 1 | 1 | 1 | 92.9  | 6.73  | 0  | 1 |
| Q9H000     | Probable E1.92307692   | 1 | 1 | 1 | 46.9  | 7.61  | 38 | 1 |
| Q9BZF3     | Oxysterol-t1.92719486  | 1 | 1 | 1 | 106.2 | 6.93  | 0  | 1 |
| Q9NP66     | High mobilil4.89913545 | 1 | 1 | 1 | 40.1  | 6.49  | 0  | 1 |
| Q6P3X3     | Tetratricocl.54211151  | 1 | 1 | 1 | 96.6  | 5.59  | 0  | 1 |
| 014777     | Kinetochore1.86915888  | 1 | 1 | 1 | 73.9  | 5.6   | 0  | 1 |
| Q9Y691     | Calcium-act3.40425532  | 1 | 1 | 1 | 27.1  | 8.38  | 0  | 1 |
| 014561     | Acyl carricl.5384615   | 1 | 1 | 1 | 17.4  | 4.93  | 0  | 1 |
| Q9NVE7     | Pantothenat1.42302717  | 1 | 1 | 1 | 85.9  | 6.28  | 32 | 1 |



|            |             |             |   |   |   |       |       |    |   |
|------------|-------------|-------------|---|---|---|-------|-------|----|---|
| Q658P3     | Metallored2 | 2.25409836  | 1 | 1 | 1 | 54.6  | 8.6   | 13 | 1 |
| Q9H6D7     | HAUS augmir | 4.4077135   | 1 | 1 | 1 | 42.4  | 5.68  | 32 | 1 |
| Q9UEY8     | Gamma-adduc | 1.13314448  | 1 | 1 | 1 | 79.1  | 6.32  | 23 | 1 |
| Q13952     | Nuclear trε | 1.74672489  | 1 | 1 | 1 | 50.3  | 6.1   | 29 | 1 |
| H7C426     | E3 ubiquiti | 4.70588235  | 1 | 1 | 1 | 19.4  | 5.15  | 28 | 1 |
| Q9NSI2     | Protein FAM | 5.2173913   | 1 | 1 | 1 | 25.4  | 11.08 | 20 | 1 |
| AOA024R5H6 | Phosphofuri | 0.93457944  | 1 | 1 | 1 | 104.8 | 7.74  | 38 | 1 |
| Q8IYL3     | UPF0688 prc | 5.76131687  | 1 | 1 | 1 | 26    | 6.9   | 0  | 1 |
| A3KMH1     | von Willebr | 0.47244094  | 1 | 1 | 1 | 214.7 | 7.4   | 31 | 1 |
| Q7Z4S6     | Kinesin-lil | 1.49342891  | 1 | 1 | 1 | 187.1 | 6.42  | 0  | 1 |
| B5MCA4     | Epithelial  | 7.30994152  | 1 | 1 | 1 | 37.9  | 8.47  | 0  | 1 |
| Q9UJX4     | Anaphase-pr | 2.1192053   | 1 | 2 | 1 | 85    | 6.87  | 0  | 1 |
| P49407     | Beta-arres  | 1.54545455  | 1 | 1 | 1 | 47    | 6.2   | 0  | 1 |
| AOA0S2Z4W2 | Giant axonε | 2.34505863  | 1 | 1 | 1 | 67.6  | 5.85  | 27 | 1 |
| Q96DV4     | 39S riboson | 5.78947368  | 1 | 1 | 1 | 44.6  | 7.53  | 0  | 1 |
| Q14669     | E3 ubiquiti | 0.70281124  | 1 | 1 | 1 | 220.3 | 8.48  | 39 | 1 |
| Q5JRA6     | Melanoma ir | 0.681699    | 1 | 1 | 1 | 213.6 | 4.84  | 0  | 1 |
| Q9ULR0     | Pre-mRNA-sr | 4.56140351  | 1 | 1 | 1 | 33    | 5.17  | 0  | 1 |
| P48651     | Phosphatid  | 4.01691332  | 1 | 1 | 1 | 55.5  | 8.43  | 0  | 1 |
| B0S7P4     | cDNA, FLJ9  | 4.65116279  | 1 | 1 | 1 | 29.4  | 9.38  | 0  | 1 |
| Q9H9A6     | Leucine-ric | 1.1627907   | 1 | 1 | 1 | 68.2  | 6.43  | 43 | 1 |
| AOA0G2JPZ2 | Taste rece  | 2.22929936  | 1 | 1 | 1 | 36.2  | 9.44  | 40 | 1 |
| AOA140VKG4 | Testis tis  | 2.97029703  | 1 | 1 | 1 | 55.4  | 4.88  | 0  | 1 |
| Q9H008     | Phospholysi | 0.7407407   | 1 | 1 | 1 | 29.1  | 6.15  | 0  | 1 |
| Q9H0U6     | 39S riboson | 5           | 1 | 1 | 1 | 20.6  | 9.54  | 28 | 1 |
| B2RB72     | cDNA, FLJ9  | 2.12765957  | 1 | 1 | 1 | 42.5  | 5.67  | 0  | 1 |
| Q01968     | Inositol pc | 1.3318535   | 1 | 1 | 1 | 104.1 | 6.55  | 23 | 1 |
| Q9NX07     | tRNA selen  | 5.92334495  | 1 | 1 | 1 | 32.5  | 4.74  | 0  | 1 |
| B2R9T9     | cDNA, FLJ9  | 4.11522634  | 1 | 1 | 1 | 26.2  | 10.67 | 0  | 1 |
| B9A6K1     | TBC1 domai  | 2.26415094  | 1 | 1 | 1 | 88.9  | 6.54  | 16 | 1 |
| Q9BX10     | GTP-binding | 1.32890365  | 1 | 1 | 1 | 65.7  | 8.05  | 0  | 1 |
| H3BVI4     | Lipase mat  | 2           | 1 | 1 | 1 | 40.1  | 9.33  | 32 | 1 |
| H7C3E3     | Myosin reg  | 10.2803738  | 1 | 2 | 1 | 11.8  | 9.32  | 0  | 1 |
| Q9HC06     | Cd002 prote | 3.35917313  | 1 | 1 | 1 | 43.5  | 5.77  | 0  | 1 |
| P41134     | DNA-binding | 11.6129032  | 1 | 1 | 1 | 16.1  | 6.99  | 0  | 1 |
| Q12974     | Protein ty  | 7.78443114  | 1 | 1 | 1 | 19.1  | 8.37  | 0  | 1 |
| O60524     | Nuclear exp | 1.11524164  | 1 | 1 | 1 | 122.9 | 6.35  | 29 | 1 |
| J3QQI0     | ARF GTPase  | 4.69798658  | 1 | 1 | 1 | 16.2  | 8.92  | 0  | 1 |
| Q7L2J0     | 7SK snRNA   | 1.59651669  | 1 | 1 | 1 | 74.3  | 9.57  | 0  | 1 |
| Q9BU23     | Lipase mat  | 2.97029703  | 1 | 1 | 1 | 79.6  | 10.1  | 0  | 1 |
| Q8NIG2     | Cap-specifi | 0.83832335  | 1 | 1 | 1 | 95.3  | 7.05  | 35 | 1 |
| Q8N2K0     | Monoacylgly | 3.01507538  | 1 | 1 | 1 | 45.1  | 8.65  | 0  | 1 |
| Q92542     | Nicastrin   | (3.10296192 | 1 | 1 | 1 | 78.4  | 5.99  | 0  | 1 |
| AOA1BOGTW1 | Tight junct | 0.88070456  | 1 | 1 | 1 | 140.6 | 8.19  | 0  | 1 |
| Q9UFW8     | CGG triplet | 5.38922156  | 1 | 1 | 1 | 18.8  | 8.95  | 0  | 1 |
| E7EX70     | DNA-direct  | ε 8.5106383 | 1 | 1 | 1 | 15.9  | 9.39  | 0  | 1 |
| Q9UBG0     | C-type man  | 1.08181204  | 1 | 1 | 1 | 166.6 | 5.83  | 0  | 1 |
| Q6VMQ6     | Activating  | 0.86614173  | 1 | 1 | 1 | 136.3 | 4.7   | 0  | 1 |
| Q92786     | Prospero hc | 1.3568521   | 1 | 1 | 1 | 83.2  | 7.18  | 0  | 1 |
| B2R4H6     | cDNA, FLJ9  | 6.2992126   | 1 | 1 | 1 | 14.5  | 4.3   | 18 | 1 |
| Q93050     | V-type prot | 1.55316607  | 1 | 1 | 1 | 96.4  | 6.43  | 0  | 1 |
| Q9BV81     | ER membran  | 6.36363636  | 1 | 1 | 1 | 12    | 10.07 | 32 | 1 |
| P10301     | Ras-relate  | 3.21100917  | 1 | 1 | 1 | 23.5  | 6.93  | 0  | 1 |
| P41229     | Lysine-spec | 0.44871795  | 1 | 1 | 1 | 175.6 | 5.58  | 0  | 1 |
| Q9NRY4     | Rho GTPase  | 0.93395597  | 1 | 1 | 1 | 170.4 | 6.64  | 0  | 1 |
| B4DT73     | Non-specifi | 3.04878049  | 1 | 1 | 1 | 55.4  | 9.19  | 0  | 1 |
| Q13033     | Striatin-3  | 1.63111669  | 1 | 1 | 1 | 87.2  | 5.36  | 34 | 1 |
| Q9H467     | CUE domain  | 4.52961672  | 1 | 1 | 1 | 32    | 4.81  | 20 | 1 |
| Q9Y5B8     | Nucleoside  | 2.39361702  | 1 | 1 | 1 | 42.5  | 6.47  | 0  | 1 |
| Q5JRX3     | Presequenc  | 1.63934426  | 1 | 1 | 1 | 117.3 | 6.92  | 0  | 1 |
| Q6ZRV2     | Protein FAM | 1.6115352   | 1 | 1 | 1 | 127   | 6.98  | 0  | 1 |
| D6RFG8     | Deoxycytidi | 2.52365931  | 1 | 1 | 1 | 36.7  | 5.43  | 0  | 1 |
| AOA024RD03 | Mitochondri | 4.97512438  | 1 | 1 | 1 | 23    | 8     | 0  | 1 |
| L8EC67     | Alternative | 17.8571429  | 1 | 1 | 1 | 6.5   | 8.88  | 28 | 1 |
| B2RBL9     | cDNA, FLJ9  | 2.4137931   | 1 | 1 | 1 | 93.3  | 5.62  | 0  | 1 |
| Q9H8H2     | Probable A  | 12.93772033 | 1 | 1 | 1 | 94    | 9.99  | 0  | 1 |
| O75146     | Huntingtin  | 1.68539326  | 1 | 1 | 1 | 119.3 | 6.67  | 0  | 1 |
| Q9HAU5     | Regulator   | (0.55031447 | 1 | 1 | 1 | 147.7 | 5.69  | 0  | 1 |
| Q68EM7     | Rho GTPase  | 0.68104427  | 1 | 1 | 1 | 95.4  | 7.62  | 31 | 1 |
| Q969S9     | Ribosome-rc | 1.79717587  | 1 | 1 | 1 | 86.5  | 6.51  | 0  | 1 |
| Q92576     | PHD finger  | 0.53948014  | 1 | 1 | 1 | 229.3 | 6.96  | 0  | 1 |
| Q9HAW4     | Claspin OS  | 0.97087379  | 1 | 1 | 1 | 151   | 4.82  | 0  | 1 |
| Q9BVT8     | Transmembr  | ε 12.601626 | 1 | 1 | 1 | 26.2  | 5.72  | 0  | 1 |

|            |                        |   |   |   |       |      |    |   |
|------------|------------------------|---|---|---|-------|------|----|---|
| AOA140VJE6 | Guanylate c1.50801131  | 1 | 1 | 1 | 118.8 | 6.64 | 0  | 1 |
| Q9UK45     | U6 snRNA-as7.76699029  | 1 | 1 | 1 | 11.6  | 5.27 | 0  | 1 |
| Q9GZT9     | Egl nine hc3.99061033  | 1 | 1 | 1 | 46    | 8.53 | 0  | 1 |
| K7EJ20     | Glutathione5.78512397  | 1 | 1 | 1 | 26.8  | 9.31 | 0  | 1 |
| B4DUA7     | Intersex-li6.33484163  | 1 | 1 | 1 | 23.5  | 8.16 | 0  | 1 |
| Q5VZK9     | F-actin-unc0.80233406  | 1 | 1 | 1 | 151.5 | 7.85 | 41 | 1 |
| Q9H9L3     | Interferon-4.24929178  | 1 | 1 | 1 | 39.1  | 9.94 | 0  | 1 |
| Q9BRK5     | 45 kDa calc3.31491713  | 1 | 1 | 1 | 41.8  | 4.86 | 33 | 1 |
| Q59FC3     | G protein-c0.90439276  | 1 | 1 | 1 | 85.8  | 7.09 | 0  | 1 |
| Q96M86     | Dynein heav0.12623606  | 1 | 1 | 1 | 533.3 | 6.71 | 32 | 1 |
| O94927     | HAUS augmir1.73775671  | 1 | 1 | 1 | 71.6  | 8.51 | 0  | 1 |
| Q13416     | Origin recc2.25303293  | 1 | 1 | 1 | 65.9  | 6.51 | 0  | 1 |
| Q6FIF0     | AN1-type z15.28846154  | 1 | 1 | 1 | 22.5  | 7.2  | 0  | 1 |
| P17706     | Tyrosine-pr2.65060241  | 1 | 1 | 1 | 48.4  | 8.29 | 0  | 1 |
| AOA024R250 | Nucleolar r10.85251492 | 1 | 1 | 1 | 132.2 | 6.95 | 28 | 1 |
| Q96MX6     | WD repeat-c3.92156863  | 1 | 1 | 1 | 39.7  | 8.09 | 0  | 1 |
| Q5T200     | Zinc finger0.65947242  | 1 | 1 | 1 | 196.5 | 9.42 | 0  | 1 |
| B1PBA3     | SKNY protei1.9630485   | 1 | 1 | 1 | 97.7  | 8.27 | 0  | 1 |
| Q53RG0     | Eukaryotic6.93877551   | 1 | 1 | 1 | 28.3  | 8.88 | 0  | 1 |
| Q5VWZ2     | Lysophosph2.53164557   | 1 | 1 | 1 | 26.3  | 7.84 | 41 | 1 |
| Q8TB61     | Adenosine i2.5462963   | 1 | 1 | 1 | 47.5  | 9.16 | 0  | 1 |
| A8K333     | cDNA FLJ75c3.21199143  | 1 | 1 | 1 | 50.4  | 8.75 | 0  | 1 |
| B4DMM7     | cDNA FLJ59t2.09424084  | 1 | 1 | 1 | 63.3  | 5.2  | 0  | 1 |
| Q9COD5     | Protein TAN0.69854917  | 1 | 1 | 1 | 202.1 | 8.32 | 0  | 1 |
| Q86WI1     | Fibrocystir0.80131982  | 1 | 1 | 1 | 465.4 | 6.11 | 0  | 1 |
| Q93074     | Mediator of0.41341295  | 1 | 1 | 1 | 242.9 | 7.05 | 23 | 1 |
| B3KUHO     | cDNA FLJ39t2.42825607  | 1 | 1 | 1 | 50.9  | 5.35 | 33 | 1 |
| AOA140VK83 | Protein phc3.33333333  | 1 | 1 | 1 | 41.5  | 4.91 | 0  | 1 |
| H3BM91     | COMM domain3.31753555  | 1 | 1 | 1 | 22.7  | 7.9  | 0  | 1 |
| Q9HD42     | Charged mu14.59183673  | 1 | 1 | 1 | 21.7  | 8.06 | 0  | 1 |
| Q8IX18     | Probable A11.79717587  | 1 | 1 | 1 | 88.5  | 8.65 | 0  | 1 |
| AOA1BOGWF3 | Mevalonate6            | 1 | 1 | 1 | 16.8  | 8.5  | 0  | 1 |
| B2R728     | cDNA, FLJ9c1.58982512  | 1 | 1 | 1 | 67.6  | 5.43 | 0  | 1 |
| Q5TBU5     | HCG17736309.21052632   | 1 | 1 | 1 | 7.9   | 5.31 | 27 | 1 |
| Q6P3X8     | PiggyBac tr3.20945946  | 1 | 1 | 1 | 68    | 8.54 | 0  | 1 |
| B4DQ75     | Death-assoc5.39215686  | 1 | 1 | 1 | 23.2  | 9.54 | 0  | 1 |
| Q9GZN7     | Protein rog7.31707317  | 1 | 2 | 1 | 32.2  | 8.16 | 0  | 1 |
| Q5T6V5     | UPF0553 prc3.22580645  | 1 | 1 | 1 | 39    | 5.88 | 0  | 1 |
| P16383     | GC-rich sec0.89628681  | 1 | 1 | 1 | 89.3  | 5.99 | 0  | 1 |
| Q9UKZ1     | CCR4-NOT tr2.35294118  | 1 | 1 | 1 | 55.2  | 6.4  | 23 | 1 |
| Q9BUL9     | Ribonuclea7.03517588   | 1 | 1 | 1 | 20.6  | 9.61 | 28 | 1 |
| E5KBQ3     | TRAF2 OS=Hc2.39520958  | 1 | 1 | 1 | 55.8  | 7.43 | 0  | 1 |
| AOA0B4J1W0 | Mediator of1.08481262  | 1 | 1 | 1 | 112.9 | 6.87 | 18 | 1 |
| O95785     | Protein Wz0.48455482   | 1 | 1 | 1 | 178.6 | 6.86 | 0  | 1 |
| Q8NDX1     | PH and SEC70.9469697   | 1 | 1 | 1 | 116.2 | 5.48 | 0  | 1 |
| B0FTY2     | NudC-like r3.04709141  | 1 | 1 | 1 | 40.8  | 5.2  | 0  | 1 |
| Q5T7P8     | Synaptotagn1.17647059  | 1 | 1 | 1 | 57.3  | 8.19 | 42 | 1 |
| Q96Q15     | Serine/thre0.38240918  | 1 | 2 | 1 | 410.2 | 6.46 | 0  | 1 |
| Q9HB81     | MLL protei7.84313725   | 1 | 1 | 1 | 23.3  | 9.31 | 0  | 1 |
| B3KX14     | cDNA FLJ44t4.16666667  | 1 | 1 | 1 | 32.3  | 9.72 | 0  | 1 |
| Q5TOF9     | Coiled-coil1.63170163  | 1 | 1 | 1 | 94.2  | 5.26 | 0  | 1 |
| L7RSM2     | Mitogen-act14.44444444 | 1 | 1 | 1 | 41.5  | 5.88 | 0  | 1 |
| Q9UPT8     | Zinc finger1.61166539  | 1 | 1 | 1 | 140.2 | 6.27 | 0  | 1 |
| AOA146IHPO | SUN domain-1.46396396  | 1 | 1 | 1 | 98.7  | 7.39 | 0  | 1 |
| P16499     | Rod cGMP-sr1.86046512  | 1 | 2 | 1 | 99.5  | 5.72 | 0  | 1 |
| Q9Y673     | Dolichyl-pl4.01234568  | 1 | 1 | 1 | 36.9  | 9.28 | 24 | 1 |
| AOA0A6YYH1 | Protein C1t2.03045685  | 1 | 1 | 1 | 43.9  | 5.3  | 25 | 1 |
| AOA1BOGTG4 | Ras associ2.51572327   | 1 | 1 | 1 | 36.4  | 9.07 | 0  | 1 |
| C9JIF9     | Acylamino-t1.22116689  | 1 | 1 | 1 | 81.6  | 5.54 | 0  | 1 |
| P82909     | 28S ribosom15.5339806  | 1 | 1 | 1 | 11.5  | 9.99 | 0  | 1 |
| Q76LA1     | CSTB protei12.244898   | 1 | 1 | 1 | 11.1  | 7.56 | 0  | 1 |
| Q9UHD2     | Serine/thre1.50891632  | 1 | 1 | 1 | 83.6  | 6.79 | 0  | 1 |
| Q15527     | Surfeit loc3.90625     | 1 | 1 | 1 | 29.6  | 9.22 | 0  | 1 |
| Q5THK1     | Protein PRF0.79033008  | 1 | 1 | 1 | 237.2 | 6.33 | 0  | 1 |
| B2RBH2     | cDNA, FLJ9t5.05226481  | 1 | 1 | 1 | 63.4  | 7.03 | 0  | 1 |
| AOA024R3L9 | Vacuolar pr3.57142857  | 1 | 1 | 1 | 39.1  | 7.36 | 0  | 1 |
| LOR6Q1     | SLC35A4 up7.76699029   | 1 | 1 | 1 | 11.1  | 8.1  | 0  | 1 |
| Q15582     | Transformir1.31771596  | 1 | 1 | 1 | 74.6  | 7.71 | 0  | 1 |
| Q9BYG4     | Partitionir1.59574468  | 1 | 1 | 1 | 40.9  | 8.22 | 42 | 1 |
| X6R3P0     | Slit homolc0.84306096  | 1 | 2 | 1 | 171.2 | 6.84 | 0  | 1 |
| Q15334     | Lethal(2) r0.84586466  | 1 | 1 | 1 | 115.3 | 6.29 | 0  | 1 |
| Q9NWQ4     | G patch don3.1120332   | 1 | 1 | 1 | 54.2  | 8.44 | 0  | 1 |
| B2RB38     | cDNA, FLJ9t1.26126126  | 1 | 1 | 1 | 59.9  | 5.97 | 34 | 1 |

|            |                        |   |   |   |       |       |    |   |
|------------|------------------------|---|---|---|-------|-------|----|---|
| Q9Y6I9     | Testis-expr4.47284345  | 1 | 1 | 1 | 34.2  | 4.86  | 0  | 1 |
| S4R2Z7     | 39S ribosom3.87096774  | 1 | 1 | 1 | 17.9  | 8.19  | 24 | 1 |
| Q9BWW7     | Probable t1.18243243   | 1 | 1 | 1 | 67.3  | 8.82  | 0  | 1 |
| Q96AQ6     | Pre-B-cell 1.50478796  | 1 | 1 | 1 | 80.6  | 5.33  | 0  | 1 |
| Q8WVM0     | Dimethylad2.60115607   | 1 | 1 | 1 | 39.5  | 9.26  | 0  | 1 |
| B2RAI2     | cDNA, FLJ9:1.25944584  | 1 | 1 | 1 | 88.9  | 6.48  | 24 | 1 |
| 000418     | Eukaryotic 0.96551724  | 1 | 1 | 1 | 82.1  | 5.33  | 14 | 1 |
| Q8N5F7     | NF-kappa-B-3.85542169  | 1 | 1 | 1 | 47.1  | 10.11 | 0  | 1 |
| Q9BUK6     | Protein mi:4.21052632  | 1 | 1 | 1 | 61.8  | 6.11  | 0  | 1 |
| Q9NUL7     | Probable A11.66666667  | 1 | 1 | 1 | 59.5  | 10.42 | 35 | 1 |
| Q92968     | Peroxisomal3.47394541  | 1 | 1 | 1 | 44.1  | 8.05  | 28 | 1 |
| 075312     | Zinc finger1.74291939  | 1 | 1 | 1 | 50.9  | 4.73  | 0  | 1 |
| 095639     | Cleavage ar7.06319703  | 1 | 1 | 1 | 30.2  | 8.31  | 0  | 1 |
| Q9POW0     | Interferon 2.89855072  | 1 | 1 | 1 | 25.2  | 8.41  | 0  | 1 |
| H7C3C1     | Interleukin2.75229358  | 1 | 2 | 1 | 22.7  | 5.8   | 31 | 1 |
| 000401     | Neural Wisc2.77227723  | 1 | 1 | 1 | 54.8  | 7.93  | 0  | 1 |
| Q7L099     | Protein RUF2.55863539  | 1 | 3 | 1 | 52.9  | 5.49  | 0  | 1 |
| Q9NVH2     | Integrator 2.18295218  | 1 | 1 | 1 | 106.8 | 8.02  | 0  | 1 |
| 075182     | Paired ampl1.54905336  | 1 | 1 | 1 | 133   | 6.93  | 0  | 1 |
| P18283     | Glutathione6.84210526  | 1 | 1 | 1 | 21.9  | 7.78  | 0  | 1 |
| Q8TD10     | Mirror-ima3.6199095    | 1 | 1 | 1 | 51.5  | 5.72  | 0  | 1 |
| Q9Y5S5     | DNA polymer0.69656073  | 1 | 1 | 1 | 262.8 | 6.48  | 0  | 1 |
| Q9BYD2     | 39S ribosom3.74531835  | 1 | 1 | 1 | 30.2  | 10.08 | 0  | 1 |
| A0A0A0MT16 | ATP-binding0.11862396  | 1 | 1 | 1 | 575.8 | 6.43  | 39 | 1 |
| POC6S8     | Leucine-ric1.01351351  | 1 | 1 | 1 | 64.8  | 8.54  | 0  | 1 |
| Q6ZNJ6     | FLJ00329 p1.71919771   | 1 | 1 | 1 | 37.7  | 11.49 | 45 | 1 |
| B4E0D0     | cDNA FLJ61(1.23647604  | 1 | 2 | 1 | 75    | 9.1   | 0  | 1 |
| R4GN18     | Membrane cc16.66666667 | 1 | 1 | 1 | 8.5   | 9.07  | 0  | 1 |
| Q8TDG2     | Actin-relat2.92553191  | 1 | 1 | 1 | 41.7  | 6.79  | 0  | 1 |
| 075157     | TSC22 domai1.41025641  | 1 | 1 | 1 | 79.2  | 5.02  | 0  | 1 |
| Q6R327     | Rapamycin-i0.76112412  | 1 | 1 | 1 | 192.1 | 7.47  | 0  | 1 |
| H7C0J5     | Centrosomal3.68421053  | 1 | 1 | 1 | 21.4  | 6.67  | 35 | 1 |
| Q9HCE5     | N6-adenosin2.4122807   | 1 | 1 | 1 | 52.1  | 6.21  | 0  | 1 |
| P51580     | Thiopurine 2.85714286  | 1 | 1 | 1 | 28.2  | 6.23  | 35 | 1 |
| Q9UJX6     | Anaphase-p1.82481752   | 1 | 1 | 1 | 93.8  | 5.22  | 0  | 1 |
| Q9H089     | Large subu2.73556231   | 1 | 1 | 1 | 75.2  | 6.38  | 0  | 1 |
| A1L4Q0     | Diacylglyce4.76190476  | 1 | 2 | 1 | 63.9  | 7.74  | 0  | 1 |
| H7C417     | Uncharacter3.25443787  | 1 | 1 | 1 | 37.4  | 8.19  | 0  | 1 |
| Q9NYZ3     | G2 and S pl2.08333333  | 1 | 1 | 1 | 76.6  | 9.39  | 30 | 1 |
| A0A0S2Z5L1 | ATP-binding0.84626234  | 1 | 1 | 1 | 79.7  | 6.34  | 32 | 1 |
| P06396     | Gelsolin 0:1.40664962  | 1 | 1 | 1 | 85.6  | 6.28  | 0  | 1 |
| Q49A88     | Coiled-coi13.46274921  | 1 | 3 | 1 | 106.2 | 8.4   | 0  | 1 |
| F5H1U9     | Multiple P10.91170825  | 1 | 1 | 1 | 223   | 5.06  | 0  | 1 |
| B2R5R9     | cDNA, FLJ9:1.94805195  | 1 | 1 | 1 | 65.3  | 9.29  | 28 | 1 |
| Q96AT1     | Uncharacter9.74025974  | 1 | 1 | 1 | 17.5  | 6.11  | 23 | 1 |
| Q9UBB6     | Neurochond1.50891632   | 1 | 1 | 1 | 78.8  | 5.48  | 0  | 1 |
| Q9ULC3     | Ras-relatec3.79746835  | 1 | 1 | 1 | 26.6  | 6.6   | 30 | 1 |
| B5BUQ5     | Interferon 15.6626506  | 1 | 4 | 1 | 20    | 8.78  | 0  | 1 |
| Q02447     | Transcripti2.17669654  | 1 | 2 | 1 | 81.9  | 5.26  | 0  | 1 |
| Q5T8D3     | Acyl-CoA-bj 3.1835206  | 1 | 1 | 1 | 60.1  | 5.33  | 22 | 1 |
| 015164     | Transcripti1.04761905  | 1 | 1 | 1 | 116.8 | 7.11  | 0  | 1 |
| A0A087X211 | Protein CIF0.99337748  | 1 | 1 | 1 | 102.2 | 6.23  | 0  | 1 |
| Q92947     | Glutaryl-Cc2.05479452  | 1 | 1 | 1 | 48.1  | 8.06  | 0  | 1 |
| Q8NG31     | Kinetochorc0.51238258  | 1 | 1 | 1 | 265.2 | 5.47  | 0  | 1 |
| Q13257     | Mitotic spi3.90243902  | 1 | 1 | 1 | 23.5  | 5.08  | 0  | 1 |
| A0A087WYC6 | Dynein hea0.30952907   | 1 | 1 | 1 | 520.7 | 6.44  | 0  | 1 |
| Q3ZCX4     | Zinc finger2.01863354  | 1 | 1 | 1 | 74.3  | 8.22  | 0  | 1 |
| P06727     | Apolipoprot5.05050505  | 1 | 1 | 1 | 45.4  | 5.38  | 0  | 1 |
| Q9H6S3     | Epidermal f1.53846154  | 1 | 1 | 1 | 80.6  | 6.84  | 26 | 1 |
| 060346     | PH domain 10.40768783  | 1 | 1 | 1 | 184.6 | 6.28  | 0  | 1 |
| Q59GL6     | Mitogen-act0.89347079  | 1 | 1 | 1 | 162.9 | 5.95  | 0  | 1 |
| B2RAK1     | cDNA, FLJ9:0.97560976  | 1 | 1 | 1 | 117.3 | 5.73  | 0  | 1 |
| Q5SXH7     | Pleckstrin 3.24675325  | 1 | 1 | 1 | 51.8  | 5.81  | 0  | 1 |
| P56381     | ATP synthas13.7254902  | 1 | 1 | 1 | 5.8   | 9.92  | 31 | 1 |
| Q9UJW0     | Dynactin su1.30434783  | 1 | 1 | 1 | 52.3  | 7.34  | 35 | 1 |
| Q8TEK3     | Histone-lys1.32259919  | 1 | 1 | 1 | 184.7 | 9.33  | 0  | 1 |
| Q99447     | Ethanolamir3.59897172  | 1 | 1 | 1 | 43.8  | 6.92  | 26 | 1 |
| Q13002     | Glutamate p0.88105727  | 1 | 1 | 1 | 102.5 | 7.9   | 0  | 1 |
| A3KC71     | Nuclear env1.26315789  | 1 | 2 | 1 | 108.1 | 9.72  | 0  | 1 |
| 014874     | [3-methyl-2.42718447   | 1 | 1 | 1 | 46.3  | 8.82  | 0  | 1 |
| Q9NQB0     | Transcripti3.39256866  | 1 | 2 | 1 | 67.9  | 8.53  | 0  | 1 |
| B2R921     | cDNA, FLJ9:1.99335548  | 1 | 1 | 1 | 32.8  | 9.29  | 0  | 1 |
| 075319     | RNA/RNP con3.33333333  | 1 | 1 | 1 | 38.9  | 9.41  | 0  | 1 |

|            |                                               |            |   |   |   |       |      |    |   |
|------------|-----------------------------------------------|------------|---|---|---|-------|------|----|---|
| C9JCN8     | Fos-related                                   | 18.8118812 | 1 | 4 | 1 | 22.2  | 8.78 | 0  | 1 |
| Q13445     | Transmembrane                                 | 7.48898678 | 1 | 1 | 1 | 25.2  | 4.48 | 0  | 1 |
| Q9BU40     | Chordin-like                                  | 1.33333333 | 1 | 1 | 1 | 51.1  | 8.13 | 0  | 1 |
| X5DR28     | Glycosyltransferase                           | 1.58730159 | 1 | 1 | 1 | 88    | 7.84 | 0  | 1 |
| P82932     | 28S ribosome                                  | 10.4       | 1 | 1 | 1 | 14.2  | 9.26 | 0  | 1 |
| I3L448     | ATP synthase                                  | 7.12250712 | 1 | 1 | 1 | 38.8  | 6.1  | 0  | 1 |
| Q6ZV70     | LanC-like                                     | 1.57142857 | 1 | 1 | 1 | 46.3  | 7.09 | 0  | 1 |
| A5PL36     | USP19 protease                                | 0.62111801 | 1 | 1 | 1 | 158.9 | 6.98 | 0  | 1 |
| O75795     | UDP-glucuronidase                             | 1.32075472 | 1 | 1 | 1 | 61.1  | 8.54 | 0  | 1 |
| Q9Y4A8     | Nuclear factor                                | 3.60230548 | 1 | 1 | 1 | 76.1  | 5.44 | 0  | 1 |
| Q15311     | RalA-binding                                  | 2.13740458 | 1 | 1 | 1 | 76    | 5.88 | 0  | 1 |
| Q59F99     | Staufen isoform 3                             | 3.72250423 | 1 | 1 | 1 | 64.7  | 9.42 | 0  | 1 |
| B2RBJ8     | Glutamyl-tRNA synthetase                      | 2.27272727 | 1 | 1 | 1 | 57.4  | 5.81 | 0  | 1 |
| B2RB94     | cDNA, FLJ95070                                | 2.70257611 | 1 | 1 | 1 | 98.5  | 5.9  | 0  | 1 |
| Q9NZN8     | CCR4-NOT complex subunit 2                    | 2.59259259 | 1 | 1 | 1 | 59.7  | 7.66 | 0  | 1 |
| B2RC89     | cDNA, FLJ95071                                | 1.70454545 | 1 | 1 | 1 | 40.4  | 7.47 | 0  | 1 |
| O14893     | Gem-associated protein 4                      | 4.28571429 | 1 | 1 | 1 | 31.6  | 5.58 | 18 | 1 |
| P20023     | Complement component 3                        | 3.09777348 | 1 | 1 | 1 | 112.8 | 7.52 | 0  | 1 |
| O95167     | NADH dehydrogenase                            | 7.14285714 | 1 | 1 | 1 | 9.3   | 8.46 | 38 | 1 |
| Q13111     | Chromatin protein 1                           | 0.83682008 | 1 | 1 | 1 | 106.9 | 5.94 | 0  | 1 |
| Q6KC79     | Nipped-B-10                                   | 1.53495007 | 1 | 1 | 1 | 315.9 | 7.91 | 0  | 1 |
| Q14119     | Vascular endothelial growth factor receptor 2 | 2.68714012 | 1 | 1 | 1 | 56.9  | 9.52 | 16 | 1 |
| Q9P013     | Spliceosome protein 5                         | 5.24017467 | 1 | 1 | 1 | 26.6  | 5.71 | 23 | 1 |
| Q8IYW2     | Cilia- and flagellum-associated protein 2     | 0.51565378 | 1 | 1 | 1 | 303.3 | 7.36 | 0  | 1 |
| A8K724     | cDNA FLJ76818                                 | 1.86125212 | 1 | 1 | 1 | 63.9  | 9.79 | 0  | 1 |
| O60287     | Nucleolar protein 1                           | 0.74856891 | 1 | 1 | 1 | 254.2 | 6.47 | 0  | 1 |
| Q13402     | Unconventional protein 0                      | 0.27088036 | 1 | 1 | 1 | 254.2 | 8.57 | 0  | 1 |
| Q8WVY7     | Ubiquitin-11                                  | 1.88679245 | 1 | 1 | 1 | 36.8  | 6.46 | 0  | 1 |
| AOA0U1RQK4 | [Protein A1]                                  | 1.22013218 | 1 | 1 | 1 | 211.7 | 8.4  | 0  | 1 |
| A0JP11     | Phosphoinositide 3-kinase                     | 0.58910162 | 1 | 1 | 1 | 153.1 | 7.23 | 0  | 1 |
| Q8N5C8     | TGF-beta-activated kinase 1                   | 4.91573034 | 1 | 1 | 1 | 78.6  | 8.46 | 0  | 1 |
| Q8N3E9     | 1-phosphatase                                 | 3.29531052 | 1 | 1 | 1 | 89.2  | 6.98 | 0  | 1 |
| Q5CZA1     | Putative uridine phosphorylase                | 2.33918129 | 1 | 1 | 1 | 38.5  | 6.65 | 0  | 1 |
| M0R2C6     | Uncharacterized protein 2                     | 2.72108844 | 1 | 1 | 1 | 65.7  | 6.54 | 23 | 1 |
| Q15652     | Probable JNK1                                 | 1.1023622  | 1 | 1 | 1 | 284.3 | 7.87 | 0  | 1 |
| Q9HBM1     | Kinetochore protein 3                         | 3.57142857 | 1 | 1 | 1 | 26.1  | 8    | 0  | 1 |
| HOYCB4     | Transcriptase 8                               | 3.33333333 | 1 | 2 | 1 | 8.4   | 11.4 | 41 | 1 |
| Q9Y6L6     | Solute carrier 1                              | 1.1577424  | 1 | 1 | 1 | 76.4  | 8.57 | 0  | 1 |
| Q15058     | Kinesin-like protein 0                        | 0.66747573 | 1 | 1 | 1 | 186.4 | 7.91 | 0  | 1 |
| P50336     | Protoporphyrin IX synthase                    | 1.88679245 | 1 | 1 | 1 | 50.7  | 8.16 | 0  | 1 |
| P53804     | E3 ubiquitin ligase                           | 0.69135802 | 1 | 1 | 1 | 229.7 | 7.52 | 0  | 1 |
| O95132     | SOX-28 protease                               | 24.0740741 | 1 | 1 | 1 | 6.3   | 10.7 | 0  | 1 |
| Q9Y6J9     | TAF6-like factor 1                            | 1.12540193 | 1 | 1 | 1 | 67.8  | 8.97 | 0  | 1 |
| Q6UW63     | KDEL motif-2                                  | 1.58964143 | 1 | 1 | 1 | 58    | 7.71 | 0  | 1 |
| L8E884     | Alternative splicing                          | 38.3561644 | 1 | 1 | 1 | 8.2   | 9.19 | 0  | 1 |

Table S6 (d). Identified proteins by 4% SDS

| Accession  | Description          | Coverage    | # Peptides | # PSMs | # Unique | PtMW [kDa] | calc. pI | Score | Mascot# | Peptides | Mascot |
|------------|----------------------|-------------|------------|--------|----------|------------|----------|-------|---------|----------|--------|
| P08238     | Heat shock           | 63.8121547  | 61         | 255    | 40       | 83.2       | 5.03     | 4007  |         | 61       |        |
| V9HWWB8    | Pyruvate ki          | 71.9397363  | 43         | 183    | 43       | 57.9       | 7.84     | 3978  |         | 43       |        |
| P49327     | Fatty acid           | 41.6965352  | 84         | 161    | 84       | 273.3      | 6.44     | 3220  |         | 84       |        |
| P21333     | Filamin-A (48.       | 5833019     | 93         | 132    | 2        | 280.6      | 6.06     | 2599  |         | 93       |        |
| Q60FE5     | Filamin A (48.       | 2824427     | 93         | 133    | 2        | 278.1      | 6.06     | 2580  |         | 93       |        |
| P78527     | DNA-depende          | 28.8032946  | 101        | 139    | 101      | 468.8      | 7.12     | 2696  |         | 101      |        |
| P35579     | Myosin-9 OS          | 49.3367347  | 92         | 130    | 80       | 226.4      | 5.6      | 2695  |         | 92       |        |
| Q15149     | Plectin OS           | 32.7497865  | 121        | 141    | 117      | 531.5      | 5.96     | 2488  |         | 121      |        |
| P63261     | Actin, cytc          | 76.2666667  | 34         | 222    | 3        | 41.8       | 5.48     | 5659  |         | 34       |        |
| Q1KLZO     | HCG15971, i          | 76          | 32         | 224    | 1        | 41.7       | 5.48     | 5567  |         | 32       |        |
| P07900     | Heat shock           | 60.9289617  | 50         | 211    | 31       | 84.6       | 5.02     | 3445  |         | 50       |        |
| P31327     | Carbamoyl- $\gamma$  | 52.6        | 68         | 140    | 68       | 164.8      | 6.74     | 2681  |         | 68       |        |
| P06733     | Alpha-enole          | 76.2672811  | 38         | 132    | 30       | 47.1       | 7.39     | 2665  |         | 38       |        |
| A0A0G2JIW1 | Heat shock           | 64.0186916  | 46         | 140    | 7        | 70.1       | 5.66     | 2306  |         | 46       |        |
| O75369     | Filamin-B (45.       | 6571868     | 83         | 108    | 78       | 278        | 5.73     | 1821  |         | 83       |        |
| V9HWWB4    | Epididymis           | 58.7155963  | 43         | 131    | 40       | 72.3       | 5.16     | 2689  |         | 43       |        |
| P13639     | Elongation           | 64.9184149  | 54         | 133    | 54       | 95.3       | 6.83     | 2559  |         | 54       |        |
| P00558     | Phosphoglyc          | 77.2182254  | 37         | 120    | 37       | 44.6       | 8.1      | 2055  |         | 37       |        |
| B4DWK5     | cDNA FLJ54           | 61.4767255  | 40         | 123    | 1        | 68         | 5.5      | 1939  |         | 40       |        |
| V9HW22     | Epididymis           | 55.8823529  | 40         | 133    | 33       | 70.9       | 5.52     | 2720  |         | 40       |        |
| A0A087WVQ6 | Clathrin hc          | 31.2686123  | 44         | 85     | 44       | 191.9      | 5.69     | 1974  |         | 44       |        |
| B7Z597     | cDNA FLJ54           | 83.8652482  | 45         | 91     | 10       | 60         | 5.74     | 2435  |         | 45       |        |
| P26038     | Moesin OS            | 64.644714   | 52         | 114    | 42       | 67.8       | 6.4      | 2141  |         | 52       |        |
| P07437     | Tubulin bet          | 71.1711712  | 28         | 161    | 5        | 49.6       | 4.89     | 2816  |         | 28       |        |
| P19338     | Nucleolin (40.       | 4225352     | 39         | 86     | 39       | 76.6       | 4.7      | 2126  |         | 39       |        |
| Q14204     | Cytoplasmic          | 22.212656   | 79         | 89     | 79       | 532.1      | 6.4      | 1382  |         | 79       |        |
| V9HVZ7     | Epididymis           | 78.4753363  | 20         | 139    | 1        | 25         | 5.66     | 3719  |         | 20       |        |
| P04406     | Glyceraldel          | 69.2537313  | 27         | 132    | 27       | 36         | 8.46     | 2163  |         | 27       |        |
| P04075     | Fructose-bi          | 82.967033   | 31         | 112    | 27       | 39.4       | 8.09     | 1752  |         | 31       |        |
| V9HWE1     | Epididymis           | 72.1030043  | 39         | 81     | 37       | 53.6       | 5.12     | 1580  |         | 39       |        |
| P68371     | Tubulin bet          | 70.1123596  | 27         | 148    | 4        | 49.8       | 4.89     | 2673  |         | 27       |        |
| P29401     | Transketol           | 53.4510433  | 30         | 90     | 30       | 67.8       | 7.66     | 1625  |         | 30       |        |
| P02545     | Prelamin-A/          | 62.5        | 45         | 79     | 11       | 74.1       | 7.02     | 1829  |         | 45       |        |
| P68104     | Elongation           | 55.1948052  | 19         | 77     | 11       | 50.1       | 9.01     | 1488  |         | 19       |        |
| Q00839     | Heterogene           | 35.8787879  | 33         | 84     | 33       | 90.5       | 6        | 1363  |         | 33       |        |
| B7Z4F6     | cDNA FLJ54           | 72.5454545  | 40         | 71     | 5        | 58.5       | 6.02     | 1684  |         | 40       |        |
| F5H5D3     | Tubulin al           | 51.0597303  | 27         | 103    | 9        | 57.7       | 5.07     | 1869  |         | 27       |        |
| A0A024R1A3 | Testicular           | 38.4688091  | 31         | 64     | 31       | 117.8      | 5.76     | 1361  |         | 31       |        |
| P14625     | Endoplasmir          | 47.1980075  | 37         | 67     | 35       | 92.4       | 4.84     | 1213  |         | 37       |        |
| P07355     | Annexin A2           | 61.0619469  | 29         | 75     | 29       | 38.6       | 7.75     | 1881  |         | 29       |        |
| P68366     | Tubulin al           | 55.3571429  | 25         | 94     | 7        | 49.9       | 5.06     | 1714  |         | 25       |        |
| Q3BDU5     | Prelamin-A/          | 65.2977413  | 36         | 64     | 2        | 55.6       | 6.65     | 1284  |         | 36       |        |
| O43707     | Alpha-actin          | 49.6158068  | 35         | 59     | 25       | 104.8      | 5.44     | 1225  |         | 35       |        |
| P04264     | Keratin, $\tau$      | 55.1242236  | 32         | 62     | 29       | 66         | 8.12     | 1337  |         | 32       |        |
| P05787     | Keratin, $\tau$      | 69.9792961  | 40         | 85     | 34       | 53.7       | 5.59     | 1434  |         | 40       |        |
| P04083     | Annexin A1           | 70.8092486  | 26         | 59     | 26       | 38.7       | 7.02     | 1310  |         | 26       |        |
| V9HW80     | Epididymis           | 49.5037221  | 32         | 53     | 32       | 89.3       | 5.26     | 1172  |         | 32       |        |
| P46013     | Proliferati          | 24.9692875  | 56         | 68     | 56       | 358.5      | 9.45     | 899   |         | 56       |        |
| Q09666     | Neuroblast           | 25.1273345  | 50         | 61     | 50       | 628.7      | 6.15     | 478   |         | 50       |        |
| A4QPBO     | IQ motif cc          | 30.2353651  | 35         | 44     | 35       | 189.2      | 6.48     | 869   |         | 35       |        |
| P07814     | Bifunction           | 37.6984127  | 42         | 63     | 42       | 170.5      | 7.33     | 833   |         | 42       |        |
| P02786     | Transferrir          | 42.6315789  | 29         | 46     | 29       | 84.8       | 6.61     | 1017  |         | 29       |        |
| Q08211     | ATP-depend           | 33.8582677  | 40         | 58     | 40       | 140.9      | 6.84     | 924   |         | 40       |        |
| A0A0S2Z491 | Nucleophos           | 66.3265306  | 17         | 44     | 5        | 32.6       | 4.78     | 794   |         | 17       |        |
| P00338     | L-lactate c          | 55.4216867  | 23         | 53     | 22       | 36.7       | 8.27     | 1170  |         | 23       |        |
| V9HWK2     | Epididymis           | 34.4797178  | 34         | 41     | 34       | 123.7      | 5.66     | 898   |         | 34       |        |
| P36578     | 60S riboso           | 59.2505855  | 28         | 64     | 28       | 47.7       | 11.06    | 826   |         | 28       |        |
| P52272     | Heterogene           | 49.5890411  | 32         | 51     | 14       | 77.5       | 8.7      | 981   |         | 32       |        |
| P05023     | Sodium/pot           | 32.3558162  | 30         | 47     | 30       | 112.8      | 5.49     | 1052  |         | 30       |        |
| Q9NR30     | Nucleolar            | 155.1724138 | 37         | 56     | 35       | 87.3       | 9.28     | 692   |         | 37       |        |
| P22626     | Heterogene           | 58.3569405  | 20         | 57     | 18       | 37.4       | 8.95     | 1113  |         | 20       |        |
| E5KNY5     | Leucine-ric          | 35.7962697  | 39         | 48     | 39       | 157.8      | 6.13     | 967   |         | 39       |        |
| P25705     | ATP syntha           | 44.8462929  | 24         | 50     | 24       | 59.7       | 9.13     | 1378  |         | 24       |        |
| P06744     | Glucose-6- $\pi$     | 50.3584229  | 25         | 49     | 25       | 63.1       | 8.32     | 688   |         | 25       |        |
| P30101     | Protein di           | 51.2871287  | 29         | 54     | 23       | 56.7       | 6.35     | 856   |         | 29       |        |
| P50990     | T-complex $\gamma$   | 52.919708   | 30         | 50     | 30       | 59.6       | 5.6      | 1187  |         | 30       |        |
| P13010     | X-ray repai          | 48.2240437  | 29         | 49     | 29       | 82.7       | 5.81     | 698   |         | 29       |        |
| A0A024R9W5 | HECT, UBA $\epsilon$ | 14.9748514  | 48         | 57     | 48       | 481.6      | 5.22     | 739   |         | 48       |        |
| P08729     | Keratin, $\tau$      | 68.2302772  | 33         | 60     | 29       | 51.4       | 5.48     | 1220  |         | 33       |        |
| O43175     | D-3-phosph           | 45.4033771  | 23         | 42     | 23       | 56.6       | 6.71     | 1010  |         | 23       |        |
| P78371     | T-complex $\gamma$   | 52.8971963  | 24         | 33     | 24       | 57.5       | 6.46     | 947   |         | 24       |        |

|            |                      |             |    |    |    |       |       |      |    |
|------------|----------------------|-------------|----|----|----|-------|-------|------|----|
| P62805     | Histone H4           | 62.1359223  | 14 | 76 | 14 | 11.4  | 11.36 | 1720 | 14 |
| A0A024RDY0 | RAN binding          | 37.1011851  | 28 | 39 | 28 | 123.6 | 4.94  | 944  | 28 |
| E1NZA1     | Peroxisome           | 17.1096967  | 34 | 43 | 34 | 292.6 | 7.43  | 727  | 34 |
| P12956     | X-ray repair         | 39.2446634  | 23 | 43 | 23 | 69.8  | 6.64  | 972  | 23 |
| A8K7F6     | cDNA FLJ78257        | 1428571     | 21 | 42 | 5  | 46.1  | 5.48  | 851  | 21 |
| V9HW88     | Calreticulin         | 58.9928058  | 20 | 60 | 20 | 48.1  | 4.44  | 908  | 20 |
| P50991     | T-complex I          | 61.9666048  | 28 | 43 | 27 | 57.9  | 7.83  | 834  | 28 |
| P17987     | T-complex I          | 49.6402878  | 24 | 43 | 24 | 60.3  | 6.11  | 967  | 24 |
| A0A024RAZ7 | Heterogeneous        | 55.1075269  | 20 | 48 | 18 | 38.7  | 9.13  | 841  | 20 |
| Q6P2Q9     | Pre-mRNA-p18         | 4582441     | 34 | 41 | 34 | 273.4 | 8.84  | 559  | 34 |
| P68032     | Actin, alpha         | 44.5623342  | 21 | 88 | 3  | 42    | 5.39  | 1649 | 21 |
| P12814     | Alpha-actinin        | 42.0403587  | 29 | 42 | 19 | 103   | 5.41  | 876  | 29 |
| O60506     | Heterogeneous        | 55.5377207  | 24 | 55 | 18 | 69.6  | 8.59  | 675  | 24 |
| Q53HV2     | Chaperonin           | 50.2762431  | 22 | 43 | 22 | 59.3  | 7.65  | 1086 | 22 |
| P09874     | Poly [ADP-ribose]    | 40.433925   | 36 | 47 | 36 | 113   | 8.88  | 691  | 36 |
| P11388     | DNA topoisomerase    | 30.6988896  | 36 | 50 | 31 | 174.3 | 8.72  | 663  | 36 |
| Q13263     | Transcriptin         | 36.7664671  | 21 | 32 | 21 | 88.5  | 5.77  | 746  | 21 |
| P35527     | Keratin, type I      | 53.1300161  | 24 | 41 | 23 | 62    | 5.24  | 819  | 24 |
| A3R0T7     | Liver histone        | 33.3333333  | 14 | 62 | 4  | 21.9  | 11.03 | 1400 | 14 |
| Q08J23     | tRNA (cytosine)      | 45.5019557  | 27 | 39 | 27 | 86.4  | 6.77  | 756  | 27 |
| A0A024RCN6 | Valyl-tRNA           | 29.7468354  | 28 | 38 | 28 | 140.4 | 7.59  | 702  | 28 |
| P23246     | Splicing factor      | 36.2093352  | 26 | 39 | 25 | 76.1  | 9.44  | 715  | 26 |
| Q16719     | Kynureninase         | 37.2043011  | 13 | 35 | 13 | 52.3  | 7.03  | 678  | 13 |
| A0A140VJQ2 | Testicular           | 62.5482625  | 13 | 35 | 1  | 28.4  | 4.72  | 528  | 13 |
| P49368     | T-complex I          | 56.146789   | 26 | 49 | 26 | 60.5  | 6.49  | 865  | 26 |
| J3KPF3     | 4F2 cell-surface     | 34.7068146  | 22 | 32 | 18 | 68.1  | 5.05  | 760  | 22 |
| Q4LE36     | ACLY variant         | 32.6297274  | 29 | 46 | 29 | 124.5 | 8.03  | 997  | 29 |
| P16403     | Histone H1           | 37.0892019  | 14 | 62 | 4  | 21.4  | 10.93 | 1405 | 14 |
| Q6IBN1     | HNRPK protein        | 61.4224138  | 24 | 50 | 1  | 51    | 5.33  | 741  | 24 |
| P26641     | Elongation           | 38.4439359  | 18 | 45 | 18 | 50.1  | 6.67  | 1075 | 18 |
| B2R7C5     | DNA helicase         | 42.2029703  | 28 | 34 | 28 | 91    | 5.77  | 688  | 28 |
| P27708     | CAD protein          | 21.3033708  | 32 | 36 | 32 | 242.8 | 6.46  | 560  | 32 |
| P11940     | Polyadenylation      | 47.327044   | 28 | 48 | 17 | 70.6  | 9.5   | 882  | 28 |
| P38646     | Stress-70 protein    | 43.2989691  | 25 | 38 | 25 | 73.6  | 6.16  | 786  | 25 |
| P80723     | Brain acid           | 84.1409692  | 13 | 33 | 13 | 22.7  | 4.63  | 481  | 13 |
| Q12906     | Interleukin          | 32.5503356  | 23 | 40 | 23 | 95.3  | 8.76  | 616  | 23 |
| Q6FHU2     | Phosphoglycolate     | 62.2047244  | 16 | 39 | 16 | 28.8  | 7.18  | 755  | 16 |
| Q9HBB3     | 60S ribosome         | 43.2525952  | 20 | 49 | 20 | 32.9  | 10.58 | 744  | 20 |
| A0A0D9SF53 | ATP-dependent        | 40.9276944  | 25 | 35 | 24 | 81.4  | 8.07  | 786  | 25 |
| Q1ELT0     | MHC Class I          | 61.369863   | 17 | 39 | 7  | 41    | 6.9   | 685  | 17 |
| A0A0S2Z4Z9 | Non-POU domain       | 43.5244161  | 22 | 40 | 21 | 54.2  | 8.95  | 782  | 22 |
| P39023     | 60S ribosome         | 51.1166253  | 23 | 42 | 23 | 46.1  | 10.18 | 842  | 23 |
| Q15029     | 116 kDa U5           | 40.4320988  | 28 | 33 | 28 | 109.4 | 5     | 572  | 28 |
| B2RDX5     | cDNA, FLJ940         | 6469761     | 27 | 43 | 27 | 82.1  | 6.67  | 732  | 27 |
| Q59F66     | DEAD box protein     | 44.2333786  | 29 | 45 | 22 | 81    | 7.93  | 695  | 29 |
| V9HWC7     | Epididymis           | 68.3035714  | 19 | 41 | 19 | 25    | 6.38  | 672  | 19 |
| O75643     | U5 small nuclear     | 17.9307116  | 31 | 34 | 31 | 244.4 | 6.06  | 787  | 31 |
| B4DI54     | cDNA FLJ563          | 31.6312057  | 20 | 57 | 2  | 77.5  | 8.06  | 925  | 20 |
| P60174     | Triosephosphate      | 69.2307692  | 16 | 32 | 16 | 30.8  | 5.92  | 624  | 16 |
| P58107     | Epiplakin (24)       | 6561886     | 31 | 35 | 29 | 555.3 | 5.6   | 557  | 31 |
| J3KTA4     | Probable A1          | 43.485342   | 27 | 49 | 20 | 69    | 8.85  | 668  | 27 |
| B4DUQ1     | cDNA FLJ545          | 59.453303   | 24 | 47 | 1  | 48.5  | 5.92  | 733  | 24 |
| V9HW31     | ATP synthase         | 50.4725898  | 18 | 33 | 18 | 56.5  | 5.4   | 589  | 18 |
| V9HW37     | Epididymis           | 62.2920518  | 23 | 35 | 22 | 59.6  | 5.66  | 484  | 23 |
| Q9NZM1     | Myoferlin (21)       | 057739      | 30 | 33 | 30 | 234.6 | 6.18  | 527  | 30 |
| P41091     | Eukaryotic           | 46.6101695  | 17 | 34 | 17 | 51.1  | 8.4   | 502  | 17 |
| P55060     | Exportin-2           | 25.2317199  | 22 | 31 | 22 | 110.3 | 5.77  | 612  | 22 |
| B2R5W2     | Heterogeneous        | 45.1724138  | 16 | 37 | 16 | 31.9  | 5.24  | 884  | 16 |
| Q7KZF4     | Staphylococcus       | 35.0549451  | 25 | 34 | 25 | 101.9 | 7.17  | 482  | 25 |
| P11586     | C-1-tetrahydro       | 33.0481283  | 27 | 36 | 26 | 101.5 | 7.3   | 602  | 27 |
| P49588     | Alanine--transferase | 30.0619835  | 26 | 35 | 26 | 106.7 | 5.53  | 784  | 26 |
| Q4LE58     | eIF4G1 variant       | 22.5369458  | 29 | 42 | 29 | 178   | 5.31  | 603  | 29 |
| P63104     | 14-3-3 protein       | 72.6530612  | 21 | 35 | 17 | 27.7  | 4.79  | 718  | 21 |
| O76021     | Ribosomal            | 144.8979592 | 23 | 31 | 23 | 54.9  | 10.13 | 476  | 23 |
| P26599     | Polypyrimidine       | 60.2636535  | 20 | 36 | 18 | 57.2  | 9.17  | 845  | 20 |
| A0A024RAC5 | Regulator (42)       | 9118774     | 19 | 32 | 19 | 56    | 8.78  | 613  | 19 |
| A8K486     | Peptidyl-protein     | 74.5454545  | 11 | 40 | 11 | 18    | 6.9   | 954  | 11 |
| Q5JR94     | 40S ribosome         | 63.4615385  | 18 | 37 | 18 | 24.2  | 10.32 | 851  | 18 |
| Q01813     | ATP-dependent        | 36.7346939  | 25 | 31 | 22 | 85.5  | 7.55  | 672  | 25 |
| Q9Y490     | Talin-1 OS-          | 16.5682802  | 28 | 35 | 28 | 269.6 | 6.07  | 529  | 28 |
| P49736     | DNA replication      | 37.0575221  | 25 | 31 | 25 | 101.8 | 5.52  | 636  | 25 |
| Q16531     | DNA damage-          | 30          | 26 | 32 | 26 | 126.9 | 5.26  | 577  | 26 |
| P61247     | 40S ribosome         | 54.1666667  | 17 | 36 | 17 | 29.9  | 9.73  | 743  | 17 |

|            |                                     |             |    |    |    |       |       |      |    |
|------------|-------------------------------------|-------------|----|----|----|-------|-------|------|----|
| P67936     | Tropomyosin                         | 77.016129   | 19 | 35 | 13 | 28.5  | 4.69  | 469  | 19 |
| A0A0S2Z4A5 | DNA helicase                        | 38.9429764  | 21 | 32 | 21 | 81.3  | 6.46  | 601  | 21 |
| P11413     | Glucose-6-phosphate                 | 52.4271845  | 25 | 43 | 25 | 59.2  | 6.84  | 467  | 25 |
| P05783     | Keratin, type I                     | 51.1627907  | 21 | 37 | 19 | 48    | 5.45  | 847  | 21 |
| P53621     | Coatomer subunit                    | 29.4117647  | 28 | 32 | 28 | 138.3 | 7.66  | 585  | 28 |
| Q8NC51     | Plasminogen                         | 42.6470588  | 14 | 28 | 14 | 44.9  | 8.65  | 463  | 14 |
| A0A024R8S5 | Protein disulfide isomerase         | 46.4566929  | 24 | 33 | 24 | 57.1  | 4.87  | 527  | 24 |
| Q59HH3     | Trifunctional aminotransferase      | 36.7112811  | 24 | 31 | 24 | 112.1 | 7.36  | 476  | 24 |
| Q15084     | Protein disulfide isomerase         | 47.7272727  | 16 | 26 | 16 | 48.1  | 5.08  | 548  | 16 |
| P54136     | Arginine--tRNA ligase               | 42.1212121  | 25 | 33 | 25 | 75.3  | 6.68  | 529  | 25 |
| P62979     | Ubiquitin                           | 60.2564103  | 12 | 78 | 12 | 18    | 9.64  | 1580 | 12 |
| B2R9K8     | cDNA, FLJ9441                       | 61.95857    | 17 | 30 | 17 | 57.9  | 6.8   | 476  | 17 |
| Q06830     | Peroxisomal protein                 | 60.8040201  | 16 | 36 | 13 | 22.1  | 8.13  | 470  | 16 |
| V6A6E5     | MHC class I                         | 151.9125683 | 12 | 32 | 6  | 40.9  | 6.3   | 570  | 12 |
| P09972     | Fructose-bisphosphate aldolase      | 25.2747253  | 8  | 49 | 4  | 39.4  | 6.87  | 595  | 8  |
| A2RUM7     | Ribosomal protein                   | 56.5656566  | 20 | 31 | 20 | 34.3  | 9.72  | 498  | 20 |
| Q04695     | Keratin, type I                     | 43.75       | 21 | 33 | 11 | 48.1  | 5.02  | 578  | 21 |
| B5MDF5     | GTP-binding protein                 | 42.0600858  | 14 | 40 | 14 | 26.2  | 7.01  | 477  | 14 |
| A0A024RBH2 | Cytoskeletal protein                | 38.2059801  | 17 | 24 | 17 | 66    | 5.92  | 650  | 17 |
| E7EVA0     | Microtubule-associated protein      | 16.2385721  | 24 | 36 | 24 | 245.3 | 6.23  | 369  | 24 |
| P62424     | 60S ribosomal protein               | 51.8796992  | 18 | 33 | 18 | 30    | 10.61 | 650  | 18 |
| Q15046     | Lysine--tRNA ligase                 | 37.3534338  | 23 | 33 | 23 | 68    | 6.35  | 595  | 23 |
| Q5U077     | L-lactate dehydrogenase             | 42.2155689  | 17 | 38 | 16 | 36.6  | 6.05  | 883  | 17 |
| P62701     | 40S ribosomal protein               | 50.9505703  | 20 | 43 | 20 | 29.6  | 10.15 | 576  | 20 |
| B2ZZ89     | Spectrin beta                       | 15.1861252  | 25 | 29 | 24 | 274.4 | 5.57  | 471  | 25 |
| J9R021     | Eukaryotic ribosomal protein        | 24.6743849  | 30 | 39 | 30 | 166.4 | 6.79  | 506  | 30 |
| P49748     | Very long-chain fatty acid synthase | 39.6946565  | 20 | 26 | 20 | 70.3  | 8.75  | 529  | 20 |
| P34932     | Heat shock protein                  | 33.452381   | 22 | 28 | 19 | 94.3  | 5.19  | 606  | 22 |
| P23526     | Adenosylhomocysteinase              | 36.1111111  | 18 | 27 | 17 | 47.7  | 6.34  | 648  | 18 |
| P27348     | 14-3-3 protein                      | 58.7755102  | 18 | 29 | 13 | 27.7  | 4.78  | 574  | 18 |
| P14866     | Heterogeneous ribosomal protein     | 47.0288625  | 18 | 29 | 17 | 64.1  | 8.22  | 429  | 18 |
| B2RDE1     | cDNA, FLJ9667                       | 33.387097   | 22 | 39 | 10 | 29    | 4.75  | 525  | 22 |
| P09429     | High mobility group protein         | 49.3023256  | 17 | 35 | 13 | 24.9  | 5.74  | 441  | 17 |
| O95373     | Importin-7                          | 24.8554913  | 19 | 23 | 19 | 119.4 | 4.82  | 523  | 19 |
| A0A0S2Z3L2 | ATPase Ca <sup>2+</sup> -dependent  | 26.5834933  | 21 | 29 | 21 | 114.7 | 5.34  | 504  | 21 |
| P20700     | Lamin-B1                            | 43.6860068  | 24 | 29 | 21 | 66.4  | 5.16  | 448  | 24 |
| G8JLB6     | Heterogeneous ribosomal protein     | 33.4745763  | 12 | 29 | 7  | 51.2  | 6.8   | 670  | 12 |
| A2A3R6     | 40S ribosomal protein               | 40.562249   | 11 | 31 | 11 | 28.7  | 10.84 | 718  | 11 |
| P31939     | Bifunctional protein                | 52.8716216  | 21 | 28 | 21 | 64.6  | 6.71  | 447  | 21 |
| P34897     | Serine hydroxymethyltransferase     | 44.2460317  | 20 | 31 | 19 | 56    | 8.53  | 589  | 20 |
| P49411     | Elongation factor                   | 48.0088496  | 17 | 26 | 17 | 49.5  | 7.61  | 586  | 17 |
| P12268     | Inosine-5'-phosphatase              | 42.4124514  | 19 | 25 | 19 | 55.8  | 6.9   | 486  | 19 |
| P23396     | 40S ribosomal protein               | 73.2510288  | 21 | 41 | 21 | 26.7  | 9.66  | 622  | 21 |
| F4ZW62     | NF45 OS=Homo sapiens                | 43.3333333  | 13 | 30 | 13 | 43    | 5.26  | 644  | 13 |
| P36871     | Phosphoglucose isomerase            | 49.4661922  | 24 | 29 | 24 | 61.4  | 6.76  | 453  | 24 |
| B2R6J2     | cDNA, FLJ9235                       | 83.61775    | 24 | 37 | 14 | 69.4  | 6.27  | 656  | 24 |
| P14324     | Farnesyl pyrophosphatase            | 25.2983294  | 12 | 23 | 12 | 48.2  | 6.15  | 461  | 12 |
| P23528     | Cofilin-1                           | 83.7349398  | 14 | 30 | 10 | 18.5  | 8.09  | 666  | 14 |
| P05141     | ADP/ATP translocase                 | 47.9865772  | 19 | 37 | 8  | 32.8  | 9.69  | 686  | 19 |
| P33991     | DNA replication fork protein        | 32.6767092  | 20 | 27 | 20 | 96.5  | 6.74  | 507  | 20 |
| E9KL35     | Epididymis protein                  | 66.5615142  | 16 | 25 | 16 | 35.1  | 7.69  | 554  | 16 |
| Q13435     | Splicing factor                     | 32.1787709  | 19 | 27 | 19 | 100.2 | 5.67  | 321  | 19 |
| A0A0A0MSS8 | Aldo-keto reductase                 | 55.1083591  | 16 | 28 | 7  | 36.8  | 7.94  | 458  | 16 |
| Q13813     | Spectrin alpha                      | 13.9967638  | 22 | 24 | 22 | 284.4 | 5.35  | 454  | 22 |
| Q6IQ30     | Polyadenylated RNA                  | 29.5454545  | 19 | 26 | 11 | 72.3  | 9.35  | 578  | 19 |
| A1KYQ7     | Eukaryotic ribosomal protein        | 21.796276   | 21 | 28 | 21 | 105.3 | 5.68  | 648  | 21 |
| A0A140VJY2 | Testicular protein                  | 34.5170455  | 20 | 27 | 19 | 80.1  | 8.21  | 644  | 20 |
| Q8NE71     | ATP-binding protein                 | 26.2721893  | 17 | 23 | 17 | 95.9  | 6.8   | 459  | 17 |
| Q16881     | Thioredoxin                         | 35.1309707  | 14 | 21 | 14 | 70.9  | 7.39  | 464  | 14 |
| P67809     | Nuclease-sucrose 6-phosphate        | 66.3580247  | 12 | 26 | 7  | 35.9  | 9.88  | 321  | 12 |
| A0A0S2Z4J1 | Hydroxysteroid oxidase              | 33.9673913  | 17 | 24 | 17 | 79.6  | 8.84  | 525  | 17 |
| P02533     | Keratin, type I                     | 34.1101695  | 17 | 26 | 4  | 51.5  | 5.16  | 536  | 17 |
| P62258     | 14-3-3 protein                      | 61.1764706  | 16 | 34 | 14 | 29.2  | 4.74  | 520  | 16 |
| O60814     | Histone H2F                         | 46.8253968  | 8  | 70 | 8  | 13.9  | 10.32 | 1366 | 8  |
| P04843     | Dolichyl-diphosphate                | 34.2668863  | 16 | 24 | 16 | 68.5  | 6.38  | 462  | 16 |
| 075694     | Nuclear pore complex protein        | 20.4169662  | 18 | 21 | 18 | 155.1 | 6.16  | 539  | 18 |
| P12270     | Nucleoprotein                       | 14.8116801  | 25 | 27 | 25 | 267.1 | 5.02  | 518  | 25 |
| P13645     | Keratin, type I                     | 37.1575342  | 19 | 33 | 16 | 58.8  | 5.21  | 690  | 19 |
| O43390     | Heterogeneous ribosomal protein     | 32.0695103  | 19 | 34 | 13 | 70.9  | 8.13  | 707  | 19 |
| P35237     | Serpin B6                           | 59.3085106  | 16 | 25 | 16 | 42.6  | 5.27  | 509  | 16 |
| A0A1C7CYX9 | Dihydropyridinase                   | 36.7799114  | 17 | 24 | 17 | 73.5  | 6.35  | 406  | 17 |
| Q9UQ80     | Proliferating cell nuclear antigen  | 50.7614213  | 19 | 30 | 19 | 43.8  | 6.55  | 535  | 19 |
| A0A024RDS1 | Heat shock protein                  | 26.8065268  | 19 | 23 | 15 | 96.8  | 5.39  | 551  | 19 |

|            |                         |             |    |    |    |       |       |     |    |
|------------|-------------------------|-------------|----|----|----|-------|-------|-----|----|
| Q5VXV3     | SET OS=Homc             | 42.4137931  | 12 | 23 | 12 | 33.5  | 4.32  | 379 | 12 |
| J3KSZO     | Eukaryotic              | 60.4347826  | 13 | 24 | 1  | 26.8  | 7.88  | 414 | 13 |
| Q9Y5B9     | FACT comple             | 17.765043   | 17 | 23 | 17 | 119.8 | 5.66  | 330 | 17 |
| B2RBR9     | cDNA, FLJ9              | 26.7123288  | 19 | 27 | 19 | 97.1  | 4.78  | 425 | 19 |
| Q15393     | Splicing fe             | 23.253903   | 21 | 29 | 21 | 135.5 | 5.26  | 484 | 21 |
| P13797     | Plastin-3 (             | 35.2380952  | 15 | 23 | 14 | 70.8  | 5.6   | 607 | 15 |
| A8K9K6     | cDNA FLJ76              | 35.3535354  | 17 | 26 | 17 | 65.9  | 9.23  | 361 | 17 |
| Q86VP6     | Cullin-assc             | 17.4796748  | 20 | 25 | 20 | 136.3 | 5.78  | 514 | 20 |
| J3KN67     | Tropomyosir             | 48.0701754  | 14 | 28 | 2  | 33.2  | 4.77  | 441 | 14 |
| P62917     | 60S riboson             | 50.9727626  | 16 | 32 | 16 | 28    | 11.03 | 349 | 16 |
| E9KL44     | Epididymis              | 34.7313237  | 21 | 24 | 21 | 82.9  | 9.04  | 424 | 21 |
| O15371     | Eukaryotic              | 40.1459854  | 16 | 22 | 16 | 63.9  | 6.05  | 435 | 16 |
| P31153     | S-adenosyl              | 43.5443038  | 17 | 28 | 17 | 43.6  | 6.48  | 479 | 17 |
| P52789     | Hexokinase-             | 28.4623773  | 19 | 23 | 17 | 102.3 | 6.05  | 409 | 19 |
| Q53SS8     | Epididymis              | 55.0561798  | 11 | 25 | 9  | 37.5  | 7.09  | 373 | 11 |
| AOA0C4DGL7 | 40S riboson             | 40.6666667  | 12 | 24 | 12 | 33.3  | 4.87  | 535 | 12 |
| Q16658     | Fascin OS=f             | 49.4929006  | 20 | 28 | 20 | 54.5  | 7.24  | 484 | 20 |
| Q59G75     | Isoleucyl-t             | 18.842846   | 19 | 25 | 19 | 146.3 | 6.35  | 523 | 19 |
| Q9UMS4     | Pre-mRNA-pi             | 55.7539683  | 16 | 28 | 16 | 55.1  | 6.61  | 241 | 16 |
| AOA140VJW5 | Testicular              | 48.9021956  | 20 | 25 | 20 | 57.1  | 6.55  | 591 | 20 |
| P55786     | Puromycin-              | 26.4417845  | 19 | 26 | 19 | 103.2 | 5.72  | 364 | 19 |
| P35908     | Keratin, t <sub>3</sub> | 33.8028169  | 19 | 26 | 13 | 65.4  | 8     | 602 | 19 |
| BOAZQ4     | Structural              | 22.5143796  | 23 | 26 | 23 | 141.4 | 7.18  | 411 | 23 |
| P00505     | Aspartate ε             | 35.3488372  | 12 | 17 | 12 | 47.5  | 9.01  | 465 | 12 |
| P20042     | Eukaryotic              | 44.1441441  | 17 | 22 | 17 | 38.4  | 5.8   | 413 | 17 |
| P27695     | DNA-(apurir             | 55.9748428  | 13 | 22 | 13 | 35.5  | 8.12  | 413 | 13 |
| BOQY89     | Eukaryotic              | 25.5354201  | 14 | 17 | 14 | 70.9  | 6.65  | 512 | 14 |
| Q9Y230     | RuvB-like               | 44.2764579  | 17 | 22 | 17 | 51.1  | 5.64  | 485 | 17 |
| Q08945     | FACT comple             | 26.3751763  | 16 | 23 | 16 | 81    | 6.87  | 412 | 16 |
| B4DJ30     | cDNA FLJ61              | 26.8341709  | 21 | 27 | 21 | 112.9 | 6.06  | 445 | 21 |
| Q16891     | MICOS compl             | 27.4406332  | 17 | 23 | 17 | 83.6  | 6.48  | 427 | 17 |
| B4DLV7     | Rab GDP di:             | 43.8752784  | 18 | 24 | 12 | 51.1  | 8.18  | 320 | 18 |
| Q6H8L0     | MHC class I             | 29.558011   | 8  | 25 | 2  | 40.3  | 6.3   | 399 | 8  |
| P00966     | Argininosuc             | 50.7281553  | 20 | 29 | 20 | 46.5  | 8.02  | 240 | 20 |
| Q13838     | Spliceosom              | 41.3551402  | 13 | 25 | 4  | 49    | 5.67  | 346 | 13 |
| P50454     | Serpin HI (             | 35.4066986  | 9  | 15 | 9  | 46.4  | 8.69  | 430 | 9  |
| P23284     | Peptidyl-pi             | 57.8703704  | 11 | 25 | 11 | 23.7  | 9.41  | 505 | 11 |
| E9KL48     | Epididymis              | 33.8709677  | 13 | 22 | 13 | 61.4  | 7.8   | 332 | 13 |
| P38919     | Eukaryotic              | 36.0097324  | 16 | 23 | 13 | 46.8  | 6.73  | 434 | 16 |
| B2RDY9     | Adenylyl c:             | 42.9473684  | 19 | 22 | 19 | 51.6  | 8.22  | 331 | 19 |
| P63241     | Eukaryotic              | 88.3116883  | 13 | 24 | 13 | 16.8  | 5.24  | 443 | 13 |
| O00299     | Chloride ir             | 65.9751037  | 14 | 22 | 14 | 26.9  | 5.17  | 490 | 14 |
| P22234     | Multifuncti             | 42.1176471  | 16 | 24 | 16 | 47    | 7.23  | 515 | 16 |
| Q13200     | 26S proteas             | 26.9823789  | 17 | 22 | 17 | 100.1 | 5.2   | 464 | 17 |
| P27824     | Calnexin O:             | 22.4662162  | 12 | 22 | 12 | 67.5  | 4.6   | 531 | 12 |
| BOZBD0     | 40S riboson             | 64.137931   | 14 | 27 | 14 | 16.1  | 10.32 | 502 | 14 |
| V9HWD6     | Epididymis              | 52.4390244  | 15 | 23 | 9  | 28.1  | 4.83  | 422 | 15 |
| P26373     | 60S riboson             | 48.8151659  | 14 | 28 | 14 | 24.2  | 11.65 | 568 | 14 |
| Q9BUF5     | Tubulin bet             | 25.1121076  | 10 | 40 | 3  | 49.8  | 4.88  | 786 | 10 |
| BOYJ88     | Radixin OS-             | 31.3893654  | 20 | 30 | 10 | 68.5  | 6.37  | 545 | 20 |
| AOA140VK56 | Transaldol:             | 44.2136499  | 16 | 23 | 16 | 37.5  | 6.81  | 461 | 16 |
| B5BUB5     | Autoantiger             | 43.872549   | 18 | 20 | 18 | 46.8  | 7.12  | 289 | 18 |
| P08758     | Annexin A5              | 52.5        | 16 | 24 | 16 | 35.9  | 5.05  | 451 | 16 |
| P08708     | 40S riboson             | 60          | 9  | 21 | 9  | 15.5  | 9.85  | 290 | 9  |
| P51991     | Heterogenec             | 39.9470899  | 15 | 23 | 2  | 39.6  | 9.01  | 300 | 15 |
| MOQZM1     | Heterogenec             | 54.5691906  | 19 | 26 | 1  | 40    | 6.73  | 404 | 19 |
| Q05639     | Elongation              | 28.9416847  | 10 | 29 | 2  | 50.4  | 9.03  | 634 | 10 |
| P15880     | 40S riboson             | 50.1706485  | 13 | 23 | 13 | 31.3  | 10.24 | 376 | 13 |
| AOA087WUT6 | Eukaryotic              | 20.3278689  | 16 | 23 | 16 | 138.6 | 5.58  | 332 | 16 |
| AOA024RBB7 | Nucleosome              | 39.1304348  | 10 | 16 | 8  | 45.3  | 4.46  | 269 | 10 |
| Q6I9V5     | SLC25A6 prc             | 46.9798658  | 17 | 28 | 4  | 32.8  | 9.74  | 549 | 17 |
| P42167     | Lamina-assc             | 51.5418502  | 15 | 20 | 7  | 50.6  | 9.38  | 280 | 15 |
| D9UB11     | MHC class               | 127.9452055 | 7  | 21 | 1  | 41.7  | 6.38  | 330 | 7  |
| AOA0U5Q331 | MHC class               | 127.9452055 | 7  | 21 | 1  | 40.8  | 6.15  | 330 | 7  |
| P55884     | Eukaryotic              | 24.0786241  | 17 | 22 | 17 | 92.4  | 5     | 402 | 17 |
| Q14103     | Heterogenec             | 35.7746479  | 14 | 23 | 12 | 38.4  | 7.81  | 386 | 14 |
| Q6FHX6     | Flap endon              | 43.9473684  | 13 | 20 | 13 | 42.6  | 8.62  | 243 | 13 |
| Q13085     | Acetyl-CoA              | 11.6794544  | 19 | 21 | 19 | 265.4 | 6.37  | 278 | 19 |
| Q08AJ9     | Histone H2/             | 35.3846154  | 5  | 30 | 1  | 14.1  | 11.05 | 669 | 5  |
| Q14566     | DNA replic:             | 25.2131547  | 19 | 23 | 19 | 92.8  | 5.41  | 404 | 19 |
| O14980     | Exportin-1              | 16.9934641  | 13 | 20 | 13 | 123.3 | 6.06  | 340 | 13 |
| P06737     | Glycogen pt             | 30.2243211  | 21 | 24 | 21 | 97.1  | 7.17  | 352 | 21 |
| AOA024R904 | Calcyclin t             | 55.2631579  | 12 | 14 | 12 | 26.2  | 8.25  | 330 | 12 |



|            |             |              |    |    |    |       |       |     |    |
|------------|-------------|--------------|----|----|----|-------|-------|-----|----|
| P15121     | Aldose red  | 45.5696203   | 14 | 27 | 13 | 35.8  | 6.98  | 268 | 14 |
| A0A024RBS2 | 60S acidic  | 47.318612    | 12 | 20 | 12 | 34.3  | 5.97  | 295 | 12 |
| B4DDB6     | Heterogene  | 37.3595506   | 14 | 22 | 1  | 37    | 8.31  | 300 | 14 |
| A0A0U5PXQ9 | MHC class   | 129.5081967  | 7  | 21 | 3  | 40.7  | 6.02  | 465 | 7  |
| P38159     | RNA-binding | 32.2250639   | 15 | 21 | 15 | 42.3  | 10.05 | 306 | 15 |
| V9HW77     | Epididymis  | 47.5065617   | 11 | 19 | 11 | 42.6  | 5.59  | 433 | 11 |
| O43776     | Asparagine  | 24.270073    | 13 | 18 | 13 | 62.9  | 6.25  | 369 | 13 |
| P54886     | Delta-1-py  | 24.1509434   | 16 | 18 | 16 | 87.2  | 7.12  | 339 | 16 |
| P62906     | 60S ribosom | 36.40553     | 9  | 20 | 9  | 24.8  | 9.94  | 340 | 9  |
| P62263     | 40S ribosom | 43.0463576   | 10 | 25 | 10 | 16.3  | 10.05 | 507 | 10 |
| A8MXP9     | Matrin-3    | 0524.2458101 | 18 | 31 | 18 | 99.9  | 6.04  | 301 | 18 |
| Q59ER5     | WD repeat   | 30.7692308   | 12 | 14 | 12 | 68.1  | 7.23  | 329 | 12 |
| P49792     | E3 SUMO-pr  | 8.62282878   | 18 | 19 | 18 | 358   | 6.2   | 426 | 18 |
| B7ZB83     | cDNA, FLJ7  | 39.6373057   | 12 | 18 | 10 | 44.1  | 4.67  | 338 | 12 |
| O75533     | Splicing fe | 24.0030675   | 21 | 23 | 21 | 145.7 | 7.09  | 234 | 21 |
| A0A140VK70 | Testis seci | 33.9491917   | 12 | 14 | 12 | 48.6  | 5.95  | 353 | 12 |
| P05198     | Eukaryotic  | 58.4126984   | 16 | 21 | 16 | 36.1  | 5.08  | 279 | 16 |
| A8K7D9     | Importin st | 32.1361059   | 12 | 22 | 12 | 57.8  | 5.4   | 540 | 12 |
| P35606     | Coatome st  | 24.5033113   | 16 | 19 | 16 | 102.4 | 5.27  | 287 | 16 |
| A0A024R4Q8 | Ribosomal r | 53.4313725   | 13 | 25 | 13 | 22.9  | 9.72  | 568 | 13 |
| A0A0U1RRH7 | Histone H2f | 27.0588235   | 6  | 32 | 2  | 18.5  | 11.52 | 522 | 6  |
| P62269     | 40S ribosom | 66.4473684   | 17 | 29 | 17 | 17.7  | 10.99 | 480 | 17 |
| Q02790     | Peptidyl-p  | 44.4444444   | 14 | 15 | 14 | 51.8  | 5.43  | 296 | 14 |
| B1AHB0     | DNA helica  | 28.4741144   | 15 | 20 | 15 | 82.2  | 8.37  | 270 | 15 |
| Q5T4S7     | E3 ubiquiti | 5.32510129   | 18 | 21 | 18 | 573.5 | 6.04  | 284 | 18 |
| P23381     | Tryptophan  | 43.0997877   | 13 | 18 | 13 | 53.1  | 6.23  | 199 | 13 |
| P08237     | ATP-depend  | 29.7435897   | 18 | 21 | 15 | 85.1  | 7.99  | 328 | 18 |
| P31689     | DnaJ homol  | 41.813602    | 13 | 17 | 13 | 44.8  | 7.08  | 350 | 13 |
| P41250     | Glycine--t  | 28.8227334   | 18 | 22 | 18 | 83.1  | 7.03  | 281 | 18 |
| B2RE46     | cDNA, FLJ9  | 20.2852615   | 7  | 11 | 7  | 69.3  | 5.78  | 202 | 7  |
| Q14240     | Eukaryotic  | 31.2039312   | 12 | 19 | 4  | 46.4  | 5.48  | 364 | 12 |
| A0A140VK27 | Leukotrienc | 28.6415712   | 13 | 18 | 13 | 69.2  | 6.18  | 460 | 13 |
| Q15424     | Scaffold at | 22.0765027   | 14 | 16 | 6  | 102.6 | 5.47  | 203 | 14 |
| J3QQ67     | 60S ribosom | 42.1052632   | 9  | 16 | 9  | 21.8  | 11.72 | 547 | 9  |
| Q8WUM4     | Programmed  | 31.9124424   | 18 | 20 | 18 | 96    | 6.52  | 293 | 18 |
| Q14683     | Structural  | 22.4655312   | 21 | 22 | 21 | 143.1 | 7.64  | 305 | 21 |
| A0A024R7B7 | CDC37 cell  | 36.5079365   | 10 | 16 | 10 | 44.4  | 5.25  | 221 | 10 |
| P40763     | Signal trar | 28.5714286   | 14 | 18 | 1  | 88    | 6.3   | 315 | 14 |
| Q9NTJ3     | Structural  | 20.3416149   | 23 | 23 | 23 | 147.1 | 6.79  | 340 | 23 |
| A8K492     | cDNA FLJ7   | 26.6666667   | 17 | 19 | 17 | 101.1 | 6.16  | 271 | 17 |
| P40925     | Malate dehy | 35.0299401   | 9  | 15 | 9  | 36.4  | 7.36  | 439 | 9  |
| A0A024R814 | Ribosomal r | 50.965251    | 17 | 25 | 17 | 30.4  | 10.71 | 396 | 17 |
| Q59ED7     | Putative ur | 21.8658892   | 13 | 17 | 13 | 77.7  | 5.64  | 257 | 13 |
| P61106     | Ras-relate  | 61.3953488   | 11 | 14 | 10 | 23.9  | 6.21  | 331 | 11 |
| P27694     | Replicatio  | 38.6363636   | 15 | 17 | 15 | 68.1  | 7.21  | 300 | 15 |
| J3QQX2     | Rho GDP-di  | 30.212766    | 5  | 13 | 5  | 25.8  | 7.44  | 159 | 5  |
| O75367     | Core histor | 43.5483871   | 13 | 22 | 13 | 39.6  | 9.79  | 361 | 13 |
| Q99623     | Prohibitin  | 51.5050167   | 12 | 14 | 12 | 33.3  | 9.83  | 409 | 12 |
| B5BTZ6     | Signal trar | 28.4785436   | 14 | 18 | 1  | 87.9  | 6.2   | 315 | 14 |
| O00148     | ATP-depend  | 35.8313817   | 13 | 21 | 4  | 49.1  | 5.68  | 209 | 13 |
| Q16576     | Histone-bir | 26.3529412   | 11 | 18 | 5  | 47.8  | 5.05  | 339 | 11 |
| P30050     | 60S ribosom | 63.6363636   | 9  | 19 | 9  | 17.8  | 9.42  | 413 | 9  |
| P27635     | 60S ribosom | 47.6635514   | 9  | 20 | 9  | 24.6  | 10.08 | 393 | 9  |
| P84098     | 60S ribosom | 29.0816327   | 11 | 22 | 11 | 23.5  | 11.47 | 493 | 11 |
| P37802     | Transgelin  | 48.7437186   | 11 | 17 | 11 | 22.4  | 8.25  | 474 | 11 |
| K7WT83     | MHC Class I | 21.369863    | 5  | 16 | 0  | 40.8  | 6.3   | 277 | 5  |
| G3V3A4     | SNW domain  | 28.3712785   | 12 | 15 | 12 | 65.4  | 9.67  | 272 | 12 |
| P13667     | Protein dis | 31.627907    | 15 | 19 | 15 | 72.9  | 5.07  | 350 | 15 |
| A0A140VJT8 | Testicular  | 32.3210412   | 9  | 13 | 9  | 49.9  | 4.82  | 364 | 9  |
| A0A0K0K1K4 | Proteasome  | 56.8548387   | 13 | 16 | 13 | 27.9  | 8.46  | 333 | 13 |
| Q562M5     | Actin-like  | 57.2815534   | 3  | 17 | 1  | 11.6  | 6.35  | 154 | 3  |
| P32004     | Neural cell | 113.9220366  | 13 | 15 | 13 | 139.9 | 6.24  | 307 | 13 |
| A8K5U9     | cDNA FLJ7   | 23.3128834   | 10 | 12 | 9  | 70.7  | 7.62  | 320 | 10 |
| Q96PK6     | RNA-binding | 30.044843    | 16 | 18 | 16 | 69.4  | 9.67  | 221 | 16 |
| A0A024R4K3 | Malate dehy | 50           | 14 | 22 | 14 | 35.5  | 8.68  | 408 | 14 |
| A0A0A6YYL6 | Protein RP  | 142.5438596  | 13 | 21 | 13 | 26.4  | 10.1  | 335 | 13 |
| Q07021     | Complement  | 33.6879433   | 6  | 20 | 6  | 31.3  | 4.84  | 418 | 6  |
| H3BVG0     | Nuclear por | 23.75        | 15 | 16 | 15 | 99.5  | 5.73  | 301 | 15 |
| Q8TEM1     | Nuclear por | 9.11499735   | 13 | 14 | 13 | 205   | 6.81  | 367 | 13 |
| A0A024RAI1 | ARP3 actin  | 39.7129187   | 13 | 16 | 13 | 47.3  | 5.88  | 241 | 13 |
| A8KAQ5     | cDNA FLJ7   | 37.0709382   | 14 | 21 | 14 | 51.5  | 10.01 | 222 | 14 |
| P29692     | Elongation  | 36.6548043   | 8  | 14 | 8  | 31.1  | 5.01  | 487 | 8  |
| A0A024R4U3 | Tubulin tyr | 23.9130435   | 10 | 15 | 10 | 74.4  | 5.53  | 243 | 10 |

|            |                                          |    |    |    |       |       |     |    |
|------------|------------------------------------------|----|----|----|-------|-------|-----|----|
| P05556     | Integrin bc21.8045113                    | 15 | 19 | 15 | 88.4  | 5.39  | 401 | 15 |
| Q5TCU8     | Tropomyosin 20.1863354                   | 7  | 16 | 2  | 36.7  | 4.78  | 210 | 7  |
| Q13283     | Ras GTPase-35.8369099                    | 12 | 21 | 11 | 52.1  | 5.52  | 244 | 12 |
| Q9UJS0     | Calcium-binding protein 23.7037037       | 12 | 14 | 8  | 74.1  | 8.62  | 294 | 12 |
| P42285     | Superkiller9.59692898                    | 9  | 12 | 9  | 117.7 | 6.52  | 266 | 9  |
| Q9P0L0     | Vesicle-associated protein 44.1767068    | 10 | 20 | 9  | 27.9  | 8.62  | 256 | 10 |
| P46087     | Probable transcription factor 22.1674877 | 15 | 17 | 15 | 89.2  | 9.23  | 369 | 15 |
| D9IAI1     | Epididymis 75.4010695                    | 10 | 13 | 10 | 21    | 7.53  | 282 | 10 |
| O43143     | Pre-mRNA-splicing factor 23.8993711      | 17 | 20 | 17 | 90.9  | 7.46  | 314 | 17 |
| A8K3H8     | cDNA FLJ77628.5229202                    | 14 | 17 | 13 | 65.3  | 5.11  | 242 | 14 |
| AOA0C4DGG9 | Chromodomain 11.1512648                  | 14 | 16 | 10 | 220.3 | 6.02  | 209 | 14 |
| AOA0A0MRM9 | Nucleolar protein epsilon 20.480226      | 12 | 20 | 12 | 74.6  | 9.47  | 467 | 12 |
| O60832     | H/ACA ribonucleoprotein 30.7392996       | 11 | 16 | 11 | 57.6  | 9.42  | 172 | 11 |
| P11387     | DNA topoisomerase 20.7843137             | 12 | 18 | 12 | 90.7  | 9.31  | 287 | 12 |
| E5KMI6     | Lon protease 22.4191867                  | 17 | 18 | 17 | 106.4 | 6.39  | 282 | 17 |
| Q86UP2     | Kinection 0513.8540899                   | 13 | 15 | 13 | 156.2 | 5.64  | 275 | 13 |
| P50579     | Methionine 34.3096234                    | 10 | 17 | 10 | 52.9  | 5.82  | 108 | 10 |
| AOA024R2Z6 | Guanine nucleotide 31.0986965            | 13 | 15 | 13 | 60.5  | 8.79  | 321 | 13 |
| P49915     | GMP synthase 25.2525253                  | 12 | 16 | 12 | 76.7  | 6.87  | 188 | 12 |
| P62888     | 60S ribosome 51.3043478                  | 5  | 17 | 5  | 12.8  | 9.63  | 408 | 5  |
| P35580     | Myosin-10 (7.74291498)                   | 14 | 17 | 2  | 228.9 | 5.54  | 348 | 14 |
| B3KY60     | cDNA FLJ16121.6957606                    | 12 | 14 | 12 | 92.2  | 8.18  | 323 | 12 |
| Q15459     | Splicing factor 22.8247163               | 16 | 18 | 16 | 88.8  | 5.22  | 203 | 16 |
| P17858     | ATP-dependent 22.5641026                 | 13 | 15 | 9  | 85    | 7.5   | 265 | 13 |
| D3DRX6     | Kinesin-like 20.4569055                  | 13 | 14 | 13 | 109.6 | 6.51  | 319 | 13 |
| P62081     | 40S ribosome 55.6701031                  | 12 | 25 | 12 | 22.1  | 10.1  | 191 | 12 |
| A8K3A8     | cDNA FLJ7532.7741935                     | 18 | 20 | 18 | 87.8  | 7.15  | 202 | 18 |
| Q12788     | Transducin 23.7623762                    | 13 | 15 | 13 | 89    | 6.9   | 336 | 13 |
| Q7Z2W4     | Zinc finger 22.2838137                   | 13 | 13 | 13 | 101.4 | 8.4   | 324 | 13 |
| B2R665     | cDNA, FLJ9230.2197802                    | 12 | 16 | 12 | 59.2  | 4.36  | 242 | 12 |
| Q9UHX1     | Poly(U)-binding protein 33.8103757       | 13 | 17 | 13 | 59.8  | 5.29  | 320 | 13 |
| AOA024RAM0 | Transporter 16.0356347                   | 10 | 12 | 10 | 102.3 | 4.98  | 237 | 10 |
| P31040     | Succinate dehydrogenase 29.2168675       | 15 | 16 | 15 | 72.6  | 7.39  | 289 | 15 |
| P17812     | CTP synthase 30.6260575                  | 16 | 18 | 16 | 66.6  | 6.46  | 185 | 16 |
| P67775     | Serine/threonine 38.8349515              | 11 | 14 | 9  | 35.6  | 5.54  | 259 | 11 |
| P35268     | 60S ribosome 48.4375                     | 8  | 16 | 8  | 14.8  | 9.19  | 385 | 8  |
| Q9BQG0     | Myb-binding protein 18.2981928           | 19 | 20 | 19 | 148.8 | 9.28  | 333 | 19 |
| P39687     | Acidic leucine 35.3413655                | 14 | 22 | 8  | 28.6  | 4.09  | 447 | 14 |
| P12004     | Proliferation 45.210728                  | 11 | 17 | 11 | 28.8  | 4.69  | 321 | 11 |
| L0R849     | Alternative splicing 14.4329897          | 9  | 19 | 1  | 42.3  | 5.92  | 362 | 9  |
| P51858     | Hepatoma-derived factor 57.0833333       | 11 | 17 | 10 | 26.8  | 4.73  | 288 | 11 |
| P36873     | Serine/threonine 32.5077399              | 9  | 13 | 2  | 37    | 6.54  | 266 | 9  |
| P62136     | Serine/threonine 32.1212121              | 9  | 13 | 2  | 37.5  | 6.33  | 236 | 9  |
| P52209     | 6-phosphogluconate 127.3291925           | 13 | 17 | 13 | 53.1  | 7.23  | 229 | 13 |
| P31947     | 14-3-3 protein 45.9677419                | 10 | 18 | 7  | 27.8  | 4.74  | 327 | 10 |
| I3L2B0     | Clustered regular interspaced 19.0938511 | 17 | 19 | 2  | 138.1 | 6.04  | 273 | 17 |
| P60228     | Eukaryotic translation 33.9325843        | 14 | 16 | 14 | 52.2  | 6.04  | 377 | 14 |
| O43242     | 26S proteasome 24.906367                 | 12 | 14 | 12 | 60.9  | 8.44  | 325 | 12 |
| P16152     | Carbonyl reductase 44.4043321            | 9  | 14 | 9  | 30.4  | 8.32  | 427 | 9  |
| P16989     | Y-box-binding protein 45.4301075         | 9  | 17 | 4  | 40.1  | 9.77  | 222 | 9  |
| Q9Y2X3     | Nucleolar protein 30.4347826             | 11 | 13 | 11 | 59.5  | 8.92  | 286 | 11 |
| V9HW04     | Serine/threonine 32.7217125              | 9  | 13 | 2  | 37.2  | 6.19  | 242 | 9  |
| B7Z596     | Tropomyosin 20.3636364                   | 6  | 13 | 2  | 31.7  | 4.89  | 265 | 6  |
| Q14444     | Caprin-1 0525.2468265                    | 12 | 13 | 12 | 78.3  | 5.25  | 236 | 12 |
| P22087     | rRNA 2'-O-methyltransferase 34.8909657   | 8  | 12 | 8  | 33.8  | 10.18 | 277 | 8  |
| P23921     | Ribonucleoside 28.4090909                | 14 | 20 | 14 | 90    | 7.15  | 243 | 14 |
| P35613     | Basigin 0523.1168831                     | 7  | 16 | 7  | 42.2  | 5.66  | 243 | 7  |
| P62633     | Cellular maturation 45.1977401           | 7  | 12 | 7  | 19.5  | 7.71  | 233 | 7  |
| S4R3H4     | Apoptotic caspase 19.79735               | 15 | 17 | 15 | 145.4 | 6     | 234 | 15 |
| P15924     | Desmoplakin 8.95158481                   | 21 | 22 | 21 | 331.6 | 6.81  | 266 | 21 |
| Q7L2H7     | Eukaryotic translation 26.4705882        | 8  | 12 | 8  | 42.5  | 5.63  | 405 | 8  |
| O15143     | Actin-related protein 40.5913978         | 11 | 15 | 11 | 40.9  | 8.35  | 167 | 11 |
| Q9Y3I0     | tRNA-splicing 34.8514851                 | 12 | 14 | 12 | 55.2  | 7.23  | 300 | 12 |
| Q9Y4L1     | Hypoxia up-regulated 20.1201201          | 14 | 15 | 14 | 111.3 | 5.22  | 307 | 14 |
| Q7L1Q6     | Basic leucine zipper 36.2768496          | 14 | 17 | 13 | 48    | 5.92  | 318 | 14 |
| O00429     | Dynamin-1-like 120.7880435               | 11 | 12 | 11 | 81.8  | 6.81  | 331 | 11 |
| Q96T67     | TOB3 05=Hon 19.3771626                   | 11 | 15 | 2  | 65.1  | 9.33  | 274 | 11 |
| B2RCM2     | cDNA, FLJ9213.1802721                    | 11 | 12 | 11 | 134.4 | 7.2   | 286 | 11 |
| P46060     | Ran GTPase-26.0647359                    | 13 | 13 | 13 | 63.5  | 4.68  | 367 | 13 |
| A8K401     | Prohibitin, 39.3382353                   | 9  | 10 | 9  | 29.8  | 5.76  | 388 | 9  |
| O75534     | Cold shock protein 19.924812             | 14 | 18 | 14 | 88.8  | 6.25  | 347 | 14 |
| P43490     | Nicotinamide 34.2158859                  | 12 | 15 | 12 | 55.5  | 7.15  | 336 | 12 |
| Q9Y617     | Phosphoserine 35.6756757                 | 10 | 15 | 10 | 40.4  | 7.66  | 351 | 10 |

|            |             |             |    |    |    |       |       |     |    |
|------------|-------------|-------------|----|----|----|-------|-------|-----|----|
| P55795     | Heterogene  | 21.6035635  | 7  | 14 | 3  | 49.2  | 6.3   | 335 | 7  |
| A0A087WW66 | 26S protea  | 19.5173137  | 13 | 16 | 13 | 105.8 | 5.41  | 151 | 13 |
| A8K5K0     | cDNA FLJ78  | 18.3411215  | 11 | 15 | 11 | 95.6  | 7.62  | 196 | 11 |
| Q15181     | Inorganic p | 34.9480969  | 6  | 13 | 6  | 32.6  | 5.86  | 202 | 6  |
| P62195     | 26S protea  | 33.4975369  | 10 | 12 | 9  | 45.6  | 7.55  | 287 | 10 |
| P62280     | 40S riboso  | 66.4556962  | 11 | 20 | 11 | 18.4  | 10.3  | 354 | 11 |
| Q53Y97     | Thymidylat  | 43.4504792  | 10 | 12 | 10 | 35.7  | 7.01  | 271 | 10 |
| Q27J81     | Inverted f  | 14.9719776  | 11 | 12 | 11 | 135.5 | 5.38  | 307 | 11 |
| B2R9S4     | cDNA, FLJ9  | 36.2068966  | 7  | 13 | 7  | 38.5  | 6.37  | 382 | 7  |
| P11498     | Pyruvate c  | 17.6570458  | 14 | 16 | 14 | 129.6 | 6.84  | 225 | 14 |
| P27105     | Erythrocyt  | 37.1527778  | 9  | 12 | 9  | 31.7  | 7.88  | 214 | 9  |
| 075822     | Eukaryotic  | 37.9844961  | 9  | 12 | 9  | 29    | 4.83  | 296 | 9  |
| P61981     | 14-3-3 pro  | 150.6072874 | 13 | 18 | 9  | 28.3  | 4.89  | 297 | 13 |
| Q00796     | Sorbitol de | 42.0168067  | 10 | 16 | 10 | 38.3  | 7.97  | 206 | 10 |
| A0A0S2Z2Z6 | Annexin (F  | 21.8424963  | 12 | 15 | 12 | 75.8  | 5.6   | 283 | 12 |
| Q4LE64     | NUMA1 vari  | 9.52380952  | 15 | 15 | 15 | 238.7 | 5.81  | 193 | 15 |
| 015067     | Phosphorib  | 11.8086697  | 12 | 13 | 12 | 144.6 | 5.76  | 315 | 12 |
| P49321     | Nuclear au  | 25.2538071  | 12 | 16 | 12 | 85.2  | 4.3   | 247 | 12 |
| 060264     | SWI/SNF-re  | 14.2585551  | 13 | 14 | 13 | 121.8 | 8.09  | 358 | 13 |
| P55036     | 26S protea  | 35.5437666  | 9  | 12 | 9  | 40.7  | 4.79  | 224 | 9  |
| Q13344     | Fus-like p  | 16.4772727  | 7  | 14 | 5  | 53.3  | 9.42  | 227 | 7  |
| A0A140VKA6 | Testis sec  | 24.9322493  | 9  | 15 | 9  | 41.3  | 5.27  | 233 | 9  |
| P25789     | Proteasome  | 43.2950192  | 8  | 11 | 8  | 29.5  | 7.72  | 389 | 8  |
| Q96HE7     | ER01-like   | 36.965812   | 11 | 14 | 11 | 54.4  | 5.68  | 295 | 11 |
| B2R704     | cDNA, FLJ9  | 22.8304406  | 12 | 18 | 12 | 83.9  | 9.54  | 198 | 12 |
| Q14157     | Ubiquitin-  | 15.5473781  | 9  | 13 | 9  | 114.5 | 7.11  | 140 | 9  |
| Q92900     | Regulator   | 12.4889283  | 10 | 12 | 10 | 124.3 | 6.61  | 221 | 10 |
| Q9NVI7     | ATPase fam  | 23.9747634  | 13 | 16 | 4  | 71.3  | 8.98  | 268 | 13 |
| 095831     | Apoptosis-  | 23.9804241  | 12 | 16 | 12 | 66.9  | 8.95  | 275 | 12 |
| P14923     | Junction p  | 21.7449664  | 12 | 13 | 12 | 81.7  | 6.14  | 251 | 12 |
| V9HW43     | Epididymis  | 53.6585366  | 8  | 13 | 8  | 22.8  | 6.4   | 381 | 8  |
| Q13423     | NAD(P) tra  | 16.7587477  | 13 | 15 | 13 | 113.8 | 8.09  | 171 | 13 |
| 000425     | Insulin-l   | 34.3696028  | 14 | 18 | 13 | 63.7  | 8.87  | 215 | 14 |
| Q9NY33     | Dipeptidyl  | 22.1166893  | 9  | 10 | 9  | 82.5  | 5.1   | 301 | 9  |
| P42166     | Lamina-ass  | 23.4870317  | 11 | 12 | 3  | 75.4  | 7.66  | 261 | 11 |
| P08779     | Keratin, t  | 26.0042283  | 11 | 15 | 4  | 51.2  | 5.05  | 383 | 11 |
| Q5T5C7     | Serine--tr  | 22.2014925  | 7  | 10 | 7  | 61.3  | 7.06  | 146 | 7  |
| A0A024R1Q8 | Ribosomal   | 47.8571429  | 8  | 13 | 8  | 14.9  | 10.51 | 269 | 8  |
| B5BUB1     | RuvB-like   | 147.1491228 | 15 | 16 | 15 | 50.2  | 6.42  | 190 | 15 |
| B2RB23     | cDNA, FLJ9  | 50.6297229  | 13 | 13 | 13 | 42    | 8.25  | 201 | 13 |
| Q8N163     | Cell cycle  | 21.6684724  | 14 | 15 | 14 | 102.8 | 5.22  | 186 | 14 |
| Q16401     | 26S protea  | 26.7857143  | 10 | 13 | 10 | 56.2  | 5.48  | 274 | 10 |
| E7EPK1     | Septin-7    | 34.0961098  | 11 | 14 | 10 | 50.7  | 8.63  | 162 | 11 |
| P30520     | Adenylosuc  | 23.6842105  | 8  | 14 | 8  | 50.1  | 6.55  | 266 | 8  |
| B4DE76     | cDNA FLJ57  | 41.6666667  | 7  | 16 | 7  | 22.9  | 5.66  | 168 | 7  |
| P42766     | 60S riboso  | 30.8943089  | 6  | 16 | 6  | 14.5  | 11.05 | 288 | 6  |
| Q1KMD3     | Heterogene  | 19.0093708  | 9  | 12 | 9  | 85.1  | 4.91  | 183 | 9  |
| Q9H0U4     | Ras-relate  | 55.721393   | 9  | 12 | 4  | 22.2  | 5.73  | 303 | 9  |
| P54819     | Adenylate   | 146.4435146 | 9  | 14 | 9  | 26.5  | 7.81  | 268 | 9  |
| A0A0S2Z3H3 | Solute car  | 27.1812081  | 10 | 18 | 1  | 33    | 9.76  | 341 | 10 |
| Q81Y81     | pre-rRNA    | 17.2373081  | 11 | 15 | 11 | 96.5  | 8.4   | 268 | 11 |
| P52701     | DNA mismat  | 15.1470588  | 14 | 15 | 14 | 152.7 | 6.9   | 264 | 14 |
| Q9UHB9     | Signal rec  | 24.0829346  | 13 | 13 | 13 | 70.7  | 8.56  | 249 | 13 |
| 075153     | Clustered   | 16.6539343  | 16 | 18 | 1  | 146.6 | 6.13  | 227 | 16 |
| B4E1U9     | cDNA FLJ54  | 34.3220339  | 6  | 14 | 5  | 26.5  | 7.59  | 394 | 6  |
| Q92621     | Nuclear po  | 6.16302187  | 11 | 12 | 11 | 227.8 | 6.19  | 253 | 11 |
| B2RD79     | cDNA, FLJ9  | 24.4939271  | 10 | 11 | 10 | 56    | 5.3   | 296 | 10 |
| A8K984     | Structural  | 15.9565581  | 15 | 16 | 15 | 135.5 | 8.43  | 268 | 15 |
| Q06210     | Glutamine-  | 15.7367668  | 7  | 9  | 7  | 78.8  | 7.11  | 231 | 7  |
| P12429     | Annexin A3  | 30.0309598  | 9  | 11 | 9  | 36.4  | 5.92  | 277 | 9  |
| Q12792     | Twinfilin-  | 123.1428571 | 7  | 11 | 7  | 40.3  | 6.96  | 249 | 7  |
| P37108     | Signal rec  | 66.1764706  | 7  | 14 | 7  | 14.6  | 10.04 | 234 | 7  |
| 095433     | Activator   | 30.1775148  | 8  | 13 | 8  | 38.3  | 5.53  | 242 | 8  |
| Q9Y2W1     | Thyroid ho  | 10.4712042  | 8  | 12 | 8  | 108.6 | 10.15 | 200 | 8  |
| Q8TEX9     | Importin-4  | 13.1359852  | 10 | 12 | 10 | 118.6 | 4.96  | 251 | 10 |
| Q14498     | RNA-bindin  | 23.7735849  | 11 | 12 | 11 | 59.3  | 10.1  | 251 | 11 |
| Q32Q12     | Nucleoside  | 29.7945205  | 4  | 14 | 2  | 32.6  | 8.48  | 237 | 4  |
| Q13151     | Heterogene  | 43.2786885  | 10 | 14 | 9  | 30.8  | 9.29  | 124 | 10 |
| X5DR09     | General tr  | 15.6312625  | 13 | 15 | 13 | 112.3 | 6.39  | 190 | 13 |
| Q15785     | Mitochondr  | 26.8608414  | 6  | 8  | 6  | 34.5  | 8.98  | 307 | 6  |
| A0A0S2Z4R1 | Tyrosine--  | 129.9242424 | 13 | 15 | 13 | 59.1  | 7.05  | 127 | 13 |
| Q9Y678     | Coatomer    | 19.4508009  | 11 | 14 | 9  | 97.7  | 5.47  | 219 | 11 |
| B2R657     | Annexin OS  | 21.3114754  | 8  | 10 | 8  | 52.6  | 5.52  | 296 | 8  |

|            |              |             |    |    |    |       |       |     |    |
|------------|--------------|-------------|----|----|----|-------|-------|-----|----|
| Q09028     | Histone-bir  | 23.7647059  | 9  | 15 | 3  | 47.6  | 4.89  | 256 | 9  |
| Q5H9N4     | Putative ur  | 43.5643564  | 10 | 14 | 8  | 34.8  | 8.95  | 185 | 10 |
| Q92522     | Histone H1   | 34.2723005  | 11 | 14 | 11 | 22.5  | 10.76 | 254 | 11 |
| AOA140VJES | AP complex   | 19.6635121  | 15 | 17 | 8  | 105.6 | 5.34  | 200 | 15 |
| Q59EA2     | Coronin (Fr  | 27.744511   | 11 | 13 | 11 | 56.3  | 8.19  | 261 | 11 |
| P50995     | Annexin A1   | 22.7722772  | 8  | 11 | 8  | 54.4  | 7.65  | 252 | 8  |
| AOA024R056 | Guanine nuc  | 37.3529412  | 9  | 14 | 6  | 37.4  | 6     | 213 | 9  |
| P26583     | High mobil   | 37.3205742  | 12 | 14 | 8  | 24    | 7.81  | 203 | 12 |
| Q53HB3     | Proteasome   | 33.4090909  | 11 | 13 | 10 | 49.2  | 6.21  | 237 | 11 |
| Q9H0A0     | RNA cytidir  | 15.2195122  | 10 | 12 | 6  | 115.7 | 8.27  | 228 | 10 |
| E9PB61     | THO comple   | 31.4393939  | 5  | 12 | 5  | 27.5  | 11.05 | 307 | 5  |
| Q15691     | Microtubul   | 47.761194   | 8  | 12 | 8  | 30    | 5.14  | 163 | 8  |
| P55265     | Double-str   | 14.1109299  | 13 | 16 | 13 | 136   | 8.65  | 122 | 13 |
| AOA024R2Q4 | Ribosomal r  | 41.1764706  | 11 | 19 | 11 | 24.1  | 11.62 | 237 | 11 |
| AOA024R1V4 | 60S ribosom  | 49.2647059  | 9  | 18 | 9  | 15.8  | 10.56 | 221 | 9  |
| Q59HE3     | Calpastatin  | 22.0663265  | 12 | 14 | 12 | 84.2  | 5.35  | 175 | 12 |
| Q5U0I6     | H. sapiens r | 54.6341463  | 9  | 11 | 4  | 22.7  | 6.21  | 317 | 9  |
| P38117     | Electron tr  | 48.627451   | 11 | 13 | 11 | 27.8  | 8.1   | 290 | 11 |
| A2A274     | Aconitate H  | 18.6335404  | 11 | 12 | 11 | 87.8  | 7.37  | 257 | 11 |
| Q9Y295     | Development  | 28.8828338  | 8  | 9  | 8  | 40.5  | 8.9   | 244 | 8  |
| M0QYS1     | 60S ribosom  | 42.8571429  | 12 | 24 | 12 | 24.2  | 10.86 | 332 | 12 |
| Q16629     | Serine/argi  | 33.6134454  | 8  | 13 | 7  | 27.4  | 11.82 | 179 | 8  |
| O43684     | Mitotic che  | 40.8536585  | 10 | 13 | 10 | 37.1  | 6.84  | 275 | 10 |
| B2RBE5     | cDNA, FLJ9   | 15.2424942  | 11 | 11 | 11 | 101.2 | 7.42  | 218 | 11 |
| E7EMB3     | Calmodulin   | 36.2244898  | 5  | 10 | 5  | 21.7  | 4.56  | 233 | 5  |
| B2R6F3     | Splicing fa  | 35.3658537  | 7  | 17 | 6  | 19.3  | 11.65 | 283 | 7  |
| Q96AG4     | Leucine-ric  | 32.247557   | 9  | 11 | 9  | 34.9  | 9.57  | 243 | 9  |
| Q9H4A4     | Aminopeptic  | 22          | 11 | 12 | 11 | 72.5  | 5.74  | 253 | 11 |
| Q9NUU7     | ATP-depend   | 29.707113   | 11 | 11 | 2  | 53.9  | 6.58  | 255 | 11 |
| P00387     | NADH-cytocl  | 26.5780731  | 6  | 10 | 6  | 34.2  | 7.59  | 170 | 6  |
| Q04828     | Aldo-keto r  | 34.6749226  | 11 | 15 | 2  | 36.8  | 7.88  | 238 | 11 |
| O14828     | Secretory c  | 27.3775216  | 6  | 9  | 6  | 38.3  | 7.64  | 188 | 6  |
| Q9Y383     | Putative R   | 28.5714286  | 9  | 12 | 5  | 46.5  | 10.01 | 178 | 9  |
| P35659     | Protein DE   | 26.1333333  | 10 | 11 | 10 | 42.6  | 8.56  | 250 | 10 |
| P62277     | 40S ribosom  | 45.0331126  | 8  | 13 | 8  | 17.2  | 10.54 | 286 | 8  |
| Q15019     | Septin-2 O   | 34.9030471  | 8  | 12 | 8  | 41.5  | 6.6   | 230 | 8  |
| P61586     | Transformir  | 38.3419689  | 8  | 11 | 3  | 21.8  | 6.1   | 242 | 8  |
| A8K690     | cDNA FLJ7    | 615.2854512 | 8  | 10 | 8  | 62.6  | 6.8   | 180 | 8  |
| P40261     | Nicotinamic  | 45.8333333  | 9  | 11 | 9  | 29.6  | 5.74  | 159 | 9  |
| Q14151     | Scaffold at  | 13.7460651  | 10 | 11 | 2  | 107.4 | 6.16  | 163 | 10 |
| P61289     | Proteasome   | 29.5275591  | 7  | 9  | 7  | 29.5  | 5.95  | 341 | 7  |
| Q96P70     | Importin-9   | 11.9116234  | 9  | 11 | 9  | 115.9 | 4.81  | 234 | 9  |
| K7ELL7     | Glucosidase  | 29.1588785  | 11 | 14 | 11 | 60.2  | 4.41  | 197 | 11 |
| AOA024R1K7 | Tyrosine 3-  | 38.2113821  | 9  | 13 | 6  | 28.2  | 4.84  | 204 | 9  |
| P00491     | Purine nucl  | 35.9861592  | 8  | 14 | 8  | 32.1  | 6.95  | 172 | 8  |
| E9PAV3     | Nascent pol  | 2.64677575  | 5  | 10 | 5  | 205.3 | 9.58  | 316 | 5  |
| O95757     | Heat shock   | 15.7330155  | 10 | 11 | 6  | 94.5  | 5.88  | 256 | 10 |
| P62879     | Guanine nuc  | 30.2941176  | 8  | 11 | 5  | 37.3  | 6     | 190 | 8  |
| P61019     | Ras-relate   | 45.754717   | 8  | 12 | 8  | 23.5  | 6.54  | 257 | 8  |
| H7BZJ3     | Protein di   | 51.2195122  | 7  | 14 | 1  | 13.5  | 7.3   | 388 | 7  |
| Q15645     | Pachytene    | 27.3148148  | 11 | 13 | 11 | 48.5  | 6.09  | 201 | 11 |
| H7BY55     | Complement   | 24.1818182  | 10 | 23 | 10 | 58.9  | 8.78  | 174 | 10 |
| Q9UHD8     | Septin-9 O   | 28.8395904  | 10 | 14 | 10 | 65.4  | 8.97  | 184 | 10 |
| Q9UIG0     | Tyrosine-p   | 8.42886042  | 10 | 12 | 10 | 170.8 | 8.48  | 141 | 10 |
| Q13247     | Serine/argi  | 25.872093   | 10 | 14 | 5  | 39.6  | 11.43 | 333 | 10 |
| Q12965     | Unconventi   | 16.3357401  | 15 | 15 | 15 | 127   | 8.92  | 179 | 15 |
| P09622     | Dihydrolip   | 20.8251473  | 8  | 12 | 8  | 54.1  | 7.85  | 203 | 8  |
| Q15293     | Reticulocal  | 28.3987915  | 5  | 12 | 5  | 38.9  | 5     | 120 | 5  |
| P16070     | CD44 antige  | 11.7250674  | 9  | 14 | 9  | 81.5  | 5.33  | 218 | 9  |
| Q15021     | Condensin    | 9.35046395  | 8  | 8  | 8  | 157.1 | 6.61  | 197 | 8  |
| O43290     | U4/U6. U5    | 15.125      | 8  | 9  | 8  | 90.2  | 6.13  | 244 | 8  |
| AOA0AOMT49 | Transcripti  | 5.71088638  | 8  | 10 | 8  | 188.7 | 8.12  | 141 | 8  |
| B2R4C0     | 60S ribosom  | 38.6363636  | 7  | 15 | 7  | 20.7  | 10.71 | 225 | 7  |
| Q7L2E3     | Putative A   | 19.12897822 | 10 | 10 | 10 | 133.9 | 8.78  | 216 | 10 |
| P25786     | Proteasome   | 34.9809886  | 9  | 15 | 9  | 29.5  | 6.61  | 208 | 9  |
| Q9NQC3     | Reticulon-   | 9.22818792  | 6  | 12 | 6  | 129.9 | 4.5   | 167 | 6  |
| P53985     | Monocarboxy  | 7.2         | 5  | 10 | 5  | 53.9  | 8.66  | 158 | 5  |
| AOA0S2Z489 | Proteasome   | 21.2719298  | 8  | 10 | 8  | 52.9  | 7.65  | 219 | 8  |
| B4DT31     | cDNA FLJ5    | 20.1503759  | 12 | 13 | 10 | 69.8  | 7.36  | 226 | 12 |
| P43246     | DNA mismat   | 13.0620985  | 9  | 10 | 9  | 104.7 | 5.77  | 248 | 9  |
| Q81VT2     | Mitotic int  | 28.5714286  | 12 | 15 | 12 | 75.3  | 6.83  | 132 | 12 |
| Q6FGH9     | DNCL1 prote  | 51.6853933  | 5  | 7  | 5  | 10.4  | 7.4   | 236 | 5  |
| AOA024R4E5 | High densit  | 10.6466877  | 9  | 9  | 9  | 141.4 | 6.87  | 237 | 9  |

|            |                                                        |    |    |    |       |       |     |    |
|------------|--------------------------------------------------------|----|----|----|-------|-------|-----|----|
| Q04446     | 1,4-alpha-galactosyl transferase 19.6581197            | 9  | 10 | 9  | 80.4  | 6.32  | 192 | 9  |
| A0A0S2Z428 | HCG2039812.22.3404255                                  | 12 | 14 | 5  | 60    | 8     | 253 | 12 |
| J3KTL2     | Serine/arginine aminotransferase 36.3636364            | 10 | 21 | 9  | 28.3  | 10.08 | 235 | 10 |
| P48047     | ATP synthase subunit epsilon 44.600939                 | 7  | 10 | 7  | 23.3  | 9.96  | 258 | 7  |
| P61204     | ADP-ribosyltransferase 159.6685083                     | 8  | 9  | 4  | 20.6  | 7.43  | 258 | 8  |
| P20618     | Proteasome subunit beta 39.8340249                     | 7  | 10 | 7  | 26.5  | 8.13  | 94  | 7  |
| Q96QK1     | Vacuolar protein sorting 14.9497487                    | 9  | 11 | 9  | 91.6  | 5.49  | 204 | 9  |
| Q549C5     | HCG2010808.66.1971831                                  | 6  | 10 | 6  | 15.5  | 4.34  | 220 | 6  |
| H7C2Q8     | EBNA1 binding protein 29.6398892                       | 9  | 13 | 9  | 40.7  | 9.98  | 207 | 9  |
| O60684     | Importin subunit alpha 15.1119403                      | 7  | 8  | 4  | 60    | 4.98  | 153 | 7  |
| Q53F64     | Heterogeneous nuclear ribonucleoprotein A2 34.3373494  | 11 | 14 | 10 | 36    | 7.42  | 237 | 11 |
| Q9BY44     | Eukaryotic translation initiation factor 4E 33.8461538 | 13 | 14 | 13 | 64.9  | 8.87  | 106 | 13 |
| V9HWH1     | Epididymis-specific protein 25.8575198                 | 9  | 10 | 9  | 42.7  | 6.28  | 234 | 9  |
| Q15366     | Poly(ADP-ribose) polymerase 1 40.8219178               | 7  | 16 | 5  | 38.6  | 6.79  | 261 | 7  |
| P20290     | Transcriptase subunit beta 46.6019417                  | 5  | 9  | 4  | 22.2  | 9.38  | 173 | 5  |
| P62249     | 40S ribosomal protein S12 53.4246575                   | 10 | 17 | 10 | 16.4  | 10.21 | 289 | 10 |
| Q01081     | Splicing factor 28.75                                  | 6  | 12 | 6  | 27.9  | 8.81  | 167 | 6  |
| P54709     | Sodium/potassium ATPase 30.8243728                     | 5  | 14 | 5  | 31.5  | 8.35  | 148 | 5  |
| P31930     | Cytochrome c 22.9166667                                | 7  | 10 | 7  | 52.6  | 6.37  | 126 | 7  |
| P49721     | Proteasome subunit beta 38.3084577                     | 7  | 10 | 7  | 22.8  | 7.02  | 115 | 7  |
| P14550     | Alcohol dehydrogenase 42.4615385                       | 10 | 12 | 9  | 36.6  | 6.79  | 182 | 10 |
| O14975     | Very long-chain fatty acid synthase 23.5483871         | 12 | 13 | 12 | 70.3  | 8.51  | 163 | 12 |
| Q5U0F4     | Eukaryotic translation initiation factor 4E 35.0769231 | 7  | 10 | 7  | 36.5  | 5.64  | 190 | 7  |
| Q9Y5M8     | Signal recognition particle 28.7822878                 | 7  | 9  | 7  | 29.7  | 9.04  | 169 | 7  |
| Q01130     | Serine/arginine aminotransferase 21.719457             | 5  | 9  | 5  | 25.5  | 11.85 | 232 | 5  |
| P12081     | Histidine kinase 19.2534381                            | 10 | 10 | 10 | 57.4  | 5.88  | 205 | 10 |
| P83731     | 60S ribosomal protein L24 33.7579618                   | 6  | 13 | 6  | 17.8  | 11.25 | 306 | 6  |
| Q12874     | Splicing factor 15.3692615                             | 6  | 9  | 6  | 58.8  | 5.38  | 151 | 6  |
| Q9UG63     | ATP-binding cassette transporter 17.3354735            | 9  | 12 | 9  | 71.2  | 7.37  | 131 | 9  |
| P62847     | 40S ribosomal protein S12 36.0902256                   | 6  | 10 | 6  | 15.4  | 10.78 | 201 | 6  |
| B2RCT6     | cDNA, FLJ9626.0521042                                  | 9  | 11 | 9  | 55.7  | 5.62  | 183 | 9  |
| Q99497     | Protein DJ-1 50.7936508                                | 8  | 11 | 8  | 19.9  | 6.79  | 196 | 8  |
| Q92499     | ATP-dependent DNA topoisomerase 18.7837838             | 11 | 12 | 11 | 82.4  | 7.23  | 140 | 11 |
| P07954     | Fumarate hydratase 28.2352941                          | 10 | 12 | 10 | 54.6  | 8.76  | 178 | 10 |
| P60866     | 40S ribosomal protein S12 31.092437                    | 5  | 12 | 5  | 13.4  | 9.94  | 211 | 5  |
| A0A024RDF6 | Heterogeneous nuclear ribonucleoprotein A2 19.2857143  | 8  | 12 | 6  | 46.4  | 9.57  | 210 | 8  |
| P45880     | Voltage-dependent calcium channel 32.9931973           | 8  | 9  | 8  | 31.5  | 7.56  | 171 | 8  |
| A0A140T9T7 | Antigen peptide 11.7574257                             | 7  | 9  | 7  | 87.1  | 8.02  | 170 | 7  |
| O00231     | 26S proteasome subunit beta 27.7251185                 | 10 | 12 | 10 | 47.4  | 6.48  | 194 | 10 |
| P28331     | NADH-ubiquinone oxidoreductase 14.0302613              | 8  | 8  | 8  | 79.4  | 6.23  | 236 | 8  |
| O75396     | Vesicle trafficking protein 43.255814                  | 10 | 13 | 10 | 24.6  | 6.92  | 283 | 10 |
| P78344     | Eukaryotic translation initiation factor 4E 16.2072767 | 13 | 14 | 13 | 102.3 | 7.14  | 144 | 13 |
| HOYKD8     | 60S ribosomal protein L24 34.1176471                   | 9  | 14 | 9  | 19.1  | 11.46 | 183 | 9  |
| P61163     | Alpha-centrin 25                                       | 5  | 9  | 5  | 42.6  | 6.64  | 154 | 5  |
| Q12904     | Aminoacyl-tRNA synthetase 140.0641026                  | 8  | 10 | 8  | 34.3  | 8.43  | 65  | 8  |
| P51149     | Ras-related protein 33.8164251                         | 6  | 12 | 6  | 23.5  | 6.7   | 254 | 6  |
| Q61BR2     | FARSLA protein 24.2125984                              | 9  | 10 | 5  | 57.5  | 7.8   | 238 | 9  |
| B2RBM7     | cDNA, FLJ9633.5106383                                  | 11 | 12 | 11 | 42.8  | 5.94  | 134 | 11 |
| D3DQRO     | Protein kinase R 27.0588235                            | 8  | 8  | 8  | 48.5  | 6.28  | 182 | 8  |
| A0A0S2Z410 | Hydroxysteroid oxidoreductase 45.5938697               | 8  | 10 | 8  | 26.9  | 7.78  | 125 | 8  |
| J3KN16     | KIAA0368 protein 7.28805156                            | 10 | 10 | 10 | 223.6 | 8.75  | 151 | 10 |
| B2R774     | cDNA, FLJ9625.8823529                                  | 8  | 10 | 8  | 57.5  | 6.77  | 149 | 8  |
| Q9BXP5     | Serrate RNase H 16.8949772                             | 12 | 12 | 12 | 100.6 | 5.96  | 133 | 12 |
| P62318     | Small nuclear ribonucleoprotein A2 37.3015873          | 4  | 7  | 4  | 13.9  | 10.32 | 154 | 4  |
| O60216     | Double-strand break repair protein 17.9080824          | 7  | 8  | 7  | 71.6  | 4.65  | 207 | 7  |
| O14776     | Transcriptase subunit beta 9.01639344                  | 10 | 10 | 10 | 123.8 | 8.65  | 183 | 10 |
| Q13185     | Chromobox protein 53.0054645                           | 7  | 10 | 7  | 20.8  | 5.33  | 180 | 7  |
| P51812     | Ribosomal protein L14 32.43243                         | 9  | 11 | 5  | 83.7  | 6.89  | 155 | 9  |
| F6QDS0     | HCG2043426.29.6450939                                  | 10 | 10 | 1  | 54    | 6.3   | 175 | 10 |
| Q15717     | ELAV-like protein 32.8220859                           | 8  | 11 | 8  | 36.1  | 9.17  | 165 | 8  |
| P50238     | Cysteine-rich protein 67.5324675                       | 4  | 11 | 4  | 8.5   | 8.75  | 129 | 4  |
| P38606     | V-type proton ATPase 24.4732577                        | 10 | 11 | 10 | 68.3  | 5.52  | 96  | 10 |
| A0A024R2W3 | Protein kinase R 22.5247525                            | 7  | 8  | 7  | 45.5  | 5.07  | 184 | 7  |
| O75390     | Citrate synthase 10.3004292                            | 6  | 10 | 6  | 51.7  | 8.32  | 213 | 6  |
| Q8TDN6     | Ribosome biogenesis protein 32.5779037                 | 7  | 10 | 7  | 41.4  | 9.92  | 56  | 7  |
| A0A087X211 | 26S proteasome subunit beta 20.0992556                 | 7  | 7  | 7  | 45.8  | 7.78  | 205 | 7  |
| H7C2I1     | Protein arginase 21.0242588                            | 7  | 8  | 4  | 42.4  | 5.35  | 192 | 7  |
| B2R5M9     | cDNA, FLJ9618.431912                                   | 11 | 13 | 11 | 83.5  | 7.02  | 108 | 11 |
| O43865     | Adenosylhomocysteinase 22.2641509                      | 9  | 12 | 8  | 58.9  | 6.89  | 168 | 9  |
| Q1HBJ4     | Mitogen-activated protein kinase 22.5                  | 6  | 9  | 4  | 41.4  | 6.98  | 207 | 6  |
| P61221     | ATP-binding cassette transporter 20.7011686            | 9  | 10 | 9  | 67.3  | 8.34  | 181 | 9  |
| Q13442     | 28 kDa heat shock protein 30.3867403                   | 7  | 8  | 7  | 20.6  | 8.87  | 168 | 7  |
| P61254     | 60S ribosomal protein L24 48.9655172                   | 12 | 18 | 12 | 17.2  | 10.55 | 261 | 12 |

|            |             |              |    |    |    |       |       |     |    |
|------------|-------------|--------------|----|----|----|-------|-------|-----|----|
| P23634     | Plasma memt | 11.2006446   | 10 | 12 | 10 | 137.8 | 6.6   | 199 | 10 |
| O14744     | Protein arg | 17.11146     | 8  | 10 | 8  | 72.6  | 6.29  | 127 | 8  |
| Q12797     | Aspartyl/a  | 13.1926121   | 8  | 11 | 8  | 85.8  | 5.01  | 239 | 8  |
| Q96AC1     | Fermitin f  | 27.9411765   | 9  | 10 | 9  | 77.8  | 6.7   | 148 | 9  |
| BOYIW6     | Archain 1,  | 17.0289855   | 9  | 9  | 9  | 61.6  | 5.85  | 245 | 9  |
| J3KNF8     | Cytochrome  | 35.3333333   | 2  | 4  | 2  | 16.7  | 4.97  | 117 | 2  |
| Q53Z07     | NPC-A-16    | 0545.8333333 | 7  | 10 | 7  | 21.9  | 9.95  | 259 | 7  |
| AOA087WTP3 | Far upstre  | 19.8312236   | 10 | 10 | 9  | 73    | 7.71  | 180 | 10 |
| P25398     | 40S ribos   | 53.7878788   | 6  | 8  | 6  | 14.5  | 7.21  | 217 | 6  |
| P26196     | Probable A  | 133.9544513  | 9  | 10 | 9  | 54.4  | 8.66  | 138 | 9  |
| Q15020     | Squamous c  | 15.7840083   | 9  | 10 | 9  | 109.9 | 5.57  | 161 | 9  |
| P61604     | 10 kDa hea  | 70.5882353   | 8  | 14 | 8  | 10.9  | 8.92  | 291 | 8  |
| A4D2P0     | Ras-relate  | 37.4407583   | 8  | 14 | 7  | 23.5  | 8.63  | 148 | 8  |
| B2RDF5     | cDNA, FLJ   | 918.4375     | 10 | 11 | 10 | 71.1  | 5.29  | 188 | 10 |
| V9HWH9     | Protein S1  | 56.1904762   | 6  | 7  | 6  | 11.7  | 7.12  | 294 | 6  |
| Q99615     | DnaJ homol  | 29.3522267   | 9  | 10 | 9  | 56.4  | 6.96  | 139 | 9  |
| P49189     | 4-trimethyl | 20.8502024   | 9  | 11 | 9  | 53.8  | 5.87  | 133 | 9  |
| AOA024R8A2 | GTPase acti | 8.74243443   | 10 | 11 | 10 | 166.1 | 5.21  | 174 | 10 |
| B3KMV5     | cDNA FLJ1   | 2710.8695652 | 8  | 8  | 8  | 122.8 | 5.85  | 196 | 8  |
| P82979     | SAP domain  | -36.6666667  | 7  | 8  | 7  | 23.7  | 6.42  | 222 | 7  |
| O75821     | Eukaryotic  | 41.5625      | 7  | 14 | 7  | 35.6  | 6.13  | 110 | 7  |
| J3KPP4     | Cisplatin r | 15.1329243   | 7  | 7  | 7  | 58.2  | 9.92  | 229 | 7  |
| Q6DD88     | Atlastin-3  | 21.4417745   | 9  | 9  | 9  | 60.5  | 5.66  | 157 | 9  |
| AOA024QZY1 | JTV1 gene,  | 27.8125      | 7  | 8  | 7  | 35.3  | 8.22  | 171 | 7  |
| D3DV26     | S100 calcic | 21.9512195   | 5  | 11 | 5  | 22.3  | 10.33 | 152 | 5  |
| P84090     | Enhancer of | 39.4230769   | 5  | 10 | 5  | 12.3  | 5.92  | 171 | 5  |
| P46776     | 60S ribos   | 25.6756757   | 4  | 9  | 4  | 16.6  | 11    | 217 | 4  |
| Q14914     | Prostaglan  | 32.218845    | 6  | 10 | 6  | 35.8  | 8.29  | 88  | 6  |
| Q15008     | 26S protea  | 21.3367609   | 8  | 11 | 8  | 45.5  | 5.62  | 120 | 8  |
| P21291     | Cysteine ar | 50.2590674   | 6  | 7  | 6  | 20.6  | 8.57  | 168 | 6  |
| P28074     | Proteasome  | 28.1368821   | 7  | 8  | 7  | 28.5  | 6.92  | 141 | 7  |
| Q13619     | Cullin-4A   | (16.9960474  | 10 | 10 | 5  | 87.6  | 8.13  | 153 | 10 |
| O00541     | Pescadillo  | 19.2176871   | 10 | 11 | 10 | 68    | 7.33  | 192 | 10 |
| P55010     | Eukaryotic  | 16.937355    | 7  | 8  | 7  | 49.2  | 5.58  | 147 | 7  |
| AOA1L7NY41 | Polypeptide | 15.5932203   | 7  | 8  | 7  | 66.4  | 8.25  | 193 | 7  |
| P62913     | 60S ribos   | 37.0786517   | 7  | 13 | 7  | 20.2  | 9.6   | 359 | 7  |
| Q16666     | Gamma-inte  | 8.78980892   | 6  | 8  | 6  | 88.2  | 9.28  | 149 | 6  |
| Q59GW6     | Acetyl-CoA  | 32.1782178   | 7  | 9  | 7  | 42.1  | 7.4   | 109 | 7  |
| V9HWJ1     | Glutathione | 21.3080169   | 8  | 9  | 8  | 52.4  | 5.92  | 125 | 8  |
| E7EUC7     | UTP-glucos  | 16.827853    | 6  | 7  | 6  | 57.8  | 8.13  | 150 | 6  |
| Q13011     | Delta(3,5)  | -22.5609756  | 5  | 6  | 5  | 35.8  | 8     | 192 | 5  |
| Q8N1G4     | Leucine-ric | 19.5540309   | 9  | 11 | 9  | 63.4  | 8.28  | 176 | 9  |
| Q14320     | Protein FAM | 16.519174    | 4  | 7  | 4  | 40.2  | 6.83  | 136 | 4  |
| P46781     | 40S ribos   | 42.2680412   | 11 | 15 | 11 | 22.6  | 10.65 | 245 | 11 |
| J3KQ32     | Obg-like A  | 123.0769231  | 6  | 10 | 6  | 46.9  | 8.06  | 162 | 6  |
| P07737     | Profilin-1  | 64.2857143   | 6  | 8  | 6  | 15    | 8.27  | 260 | 6  |
| AOA024R6I3 | Testicular  | 31.0502283   | 6  | 8  | 6  | 25    | 7.44  | 196 | 6  |
| Q9BUQ8     | Probable A  | 113.1707317  | 9  | 10 | 9  | 95.5  | 9.55  | 146 | 9  |
| P62750     | 60S ribos   | 37.8205128   | 8  | 15 | 8  | 17.7  | 10.45 | 206 | 8  |
| P51148     | Ras-relate  | 36.1111111   | 6  | 8  | 4  | 23.5  | 8.41  | 276 | 6  |
| AOA024R8P8 | Ribosomal   | 157.1428571  | 6  | 11 | 6  | 8.2   | 10.1  | 172 | 6  |
| P08559     | Pyruvate de | 29.2307692   | 8  | 8  | 8  | 43.3  | 8.06  | 188 | 8  |
| Q8NBJ5     | Procollage  | 16.7202572   | 9  | 10 | 9  | 71.6  | 7.31  | 161 | 9  |
| P52888     | Thimet oli  | 13.2075472   | 8  | 9  | 8  | 78.8  | 6.05  | 144 | 8  |
| A8KOT9     | cDNA FLJ7   | 533.5664336  | 7  | 8  | 6  | 32.9  | 5.69  | 160 | 7  |
| J3QRS3     | Myosin reg  | 44.6327684   | 7  | 8  | 7  | 20.4  | 4.75  | 127 | 7  |
| P30419     | Glycylpepti | 13.5080645   | 6  | 6  | 6  | 56.8  | 7.8   | 172 | 6  |
| Q9NSD9     | Phenylalan  | 18.8455008   | 9  | 9  | 9  | 66.1  | 6.84  | 154 | 9  |
| Q96PZ0     | Pseudourid  | 21.4826021   | 9  | 9  | 9  | 75    | 6.37  | 168 | 9  |
| A7BI36     | p180/ribos  | 9.61038961   | 9  | 10 | 9  | 165.6 | 8.97  | 140 | 9  |
| AOA140VJZ1 | Ubiquitinyl | 111.1888112  | 7  | 8  | 6  | 95.7  | 5.03  | 215 | 7  |
| Q32MZ4     | Leucine-ric | 16.5841584   | 7  | 7  | 7  | 89.2  | 4.65  | 111 | 7  |
| Q9Y6C9     | Mitochondri | 21.7821782   | 6  | 8  | 6  | 33.3  | 7.97  | 145 | 6  |
| Q53GL6     | RNA binding | 30.2931596   | 8  | 9  | 8  | 32.5  | 9.17  | 174 | 8  |
| Q9Y2T3     | Guanine de  | 31.938326    | 10 | 10 | 10 | 51    | 5.68  | 138 | 10 |
| B1AKJ5     | Nardilysin  | 6.97292863   | 7  | 10 | 7  | 139.3 | 5     | 210 | 7  |
| AOA140VK53 | Testicular  | 4.43313953   | 9  | 9  | 9  | 299.4 | 12.06 | 124 | 9  |
| Q99536     | Synaptic ve | 24.9363868   | 6  | 7  | 6  | 41.9  | 6.29  | 125 | 6  |
| R4GNH3     | 26S protea  | 26.0047281   | 7  | 9  | 7  | 47.3  | 5.22  | 141 | 7  |
| Q96HS1     | Serine/thre | 32.8719723   | 8  | 10 | 8  | 32    | 8.68  | 146 | 8  |
| Q9NSE4     | Isoleucine  | -10.4743083  | 9  | 10 | 9  | 113.7 | 7.2   | 175 | 9  |
| Q86XP3     | ATP-depend  | 14.8187633   | 8  | 9  | 8  | 102.9 | 7.02  | 147 | 8  |
| P26447     | Protein S1  | 48.5148515   | 8  | 12 | 8  | 11.7  | 6.11  | 196 | 8  |

|            |                                                  |             |    |    |    |       |       |     |    |
|------------|--------------------------------------------------|-------------|----|----|----|-------|-------|-----|----|
| Q8NF37     | Lysophosphatidylcholine                          | 14.6067416  | 7  | 8  | 7  | 59.1  | 6.02  | 205 | 7  |
| P22695     | Cytochrome c                                     | 31.1258278  | 8  | 10 | 8  | 48.4  | 8.63  | 97  | 8  |
| A8K517     | Ribosomal protein L1                             | 55.2447552  | 8  | 15 | 8  | 15.8  | 10.49 | 264 | 8  |
| P06454     | Prothymosin                                      | 27.9279279  | 4  | 12 | 4  | 12.2  | 3.78  | 414 | 4  |
| P31150     | Rab GDP dissociation inhibitor 1                 | 18.344519   | 7  | 10 | 1  | 50.6  | 5.14  | 159 | 7  |
| G3V5Z7     | Proteasome activator complex subunit 1           | 32.9365079  | 8  | 8  | 8  | 28.1  | 6.76  | 137 | 8  |
| P68431     | Histone H3                                       | 47.7941176  | 6  | 15 | 6  | 15.4  | 11.12 | 267 | 6  |
| Q15436     | Protein tyrosine phosphatase SH-PTPase           | 14.5098039  | 8  | 8  | 6  | 86.1  | 7.08  | 142 | 8  |
| B2RBEO     | cDNA, FLJ9115.4166667                            | 15.4166667  | 8  | 8  | 6  | 80.3  | 8.46  | 172 | 8  |
| Q6FGH5     | RPS21 protein                                    | 31.3253012  | 3  | 5  | 3  | 9.1   | 8.5   | 296 | 3  |
| Q71V07     | Signal receptor                                  | 14.7540984  | 8  | 10 | 8  | 74.6  | 9.19  | 166 | 8  |
| B2RAQ8     | cDNA, FLJ9111.2548512                            | 11.2548512  | 7  | 8  | 7  | 88.3  | 8.59  | 161 | 7  |
| E5RJD8     | Tubulin-specific gamma-tubulin ring complex      | 49.5798319  | 6  | 8  | 6  | 14.3  | 5.12  | 144 | 6  |
| Q01650     | Large neutral amino acid transporter             | 6.7061144   | 3  | 6  | 3  | 55    | 7.72  | 131 | 3  |
| P62316     | Small nuclear ribonucleoprotein A2               | 49.1525424  | 6  | 11 | 6  | 13.5  | 9.91  | 77  | 6  |
| Q5U5J2     | CSNK2A1 precursor                                | 28.2115869  | 7  | 7  | 7  | 45.9  | 7.96  | 95  | 7  |
| Q02880     | DNA topoisomerase II                             | 6.88806888  | 9  | 10 | 4  | 183.2 | 8     | 153 | 9  |
| Q61PH7     | RPL14 protein                                    | 24.0909091  | 5  | 10 | 1  | 23.8  | 10.93 | 301 | 5  |
| B2RD27     | cDNA, FLJ9115.4166667                            | 15.4166667  | 6  | 7  | 6  | 37    | 6.77  | 152 | 6  |
| A8K5Y7     | cDNA FLJ7869.9.6345515                           | 9.6345515   | 7  | 8  | 7  | 136.2 | 5.9   | 100 | 7  |
| Q14126     | Desmoglein-1                                     | 10.822898   | 6  | 7  | 6  | 122.2 | 5.24  | 117 | 6  |
| Q96TA1     | Niban-like protein                               | 12.8686327  | 7  | 10 | 7  | 84.1  | 6.19  | 153 | 7  |
| AOA0S2Z3Y1 | Lectin galactose oxidase                         | 26.8376068  | 10 | 11 | 10 | 65.3  | 5.27  | 63  | 10 |
| AOMNN4     | CDW3/SMU1 (14.0350877)                           | 14.0350877  | 7  | 8  | 7  | 57.5  | 7.18  | 136 | 7  |
| Q10567     | AP-1 complex subunit 1                           | 12.0126449  | 10 | 12 | 3  | 104.6 | 5.06  | 125 | 10 |
| Q969V3     | Nicalin OS                                       | 15.9857904  | 7  | 7  | 7  | 62.9  | 6.89  | 227 | 7  |
| F5H867     | 4F2 cell-surface protein                         | 54.0740741  | 5  | 7  | 1  | 14.7  | 5.96  | 240 | 5  |
| P00492     | Hypoxanthine phosphoribosyltransferase           | 35.3211009  | 7  | 8  | 7  | 24.6  | 6.68  | 218 | 7  |
| P17813     | Endoglin                                         | 15.0455927  | 7  | 8  | 7  | 70.5  | 6.61  | 161 | 7  |
| P62244     | 40S ribosomal protein S19                        | 50.7692308  | 8  | 11 | 4  | 14.8  | 10.13 | 198 | 8  |
| A8K3R2     | Ribosome biogenesis factor                       | 8.8793566   | 8  | 9  | 8  | 83.5  | 6.13  | 154 | 8  |
| AOA024R7T3 | Heterogeneous nuclear ribonucleoprotein A1       | 16.1445783  | 5  | 11 | 3  | 45.6  | 5.58  | 216 | 5  |
| P13073     | Cytochrome c                                     | 38.4615385  | 8  | 11 | 8  | 19.6  | 9.51  | 159 | 8  |
| AOA0A0MSW4 | Phosphatidylcholine transferase                  | 30.99631    | 5  | 6  | 5  | 31.6  | 6.87  | 102 | 5  |
| P52788     | Spermine synthase                                | 27.8688525  | 7  | 10 | 7  | 41.2  | 5.02  | 117 | 7  |
| AOA024R1S8 | LIM and SH3 domain protein                       | 36.7816092  | 7  | 8  | 7  | 29.7  | 7.05  | 137 | 7  |
| P08727     | Keratin, type I cytochrome 19                    | 19.25       | 9  | 11 | 4  | 44.1  | 5.14  | 251 | 9  |
| P49756     | RNA-binding protein                              | 7.94780546  | 5  | 7  | 5  | 100.1 | 6.32  | 82  | 5  |
| Q6IAX2     | RPL21 protein                                    | 43.125      | 7  | 12 | 7  | 18.6  | 10.49 | 171 | 7  |
| Q8NBS9     | Thioredoxin                                      | 14.3518519  | 4  | 7  | 4  | 47.6  | 5.97  | 136 | 4  |
| P33316     | Deoxyuridine kinase                              | 23.015873   | 5  | 8  | 3  | 26.5  | 9.36  | 191 | 5  |
| Q7Z7K6     | Centromere protein A                             | 25.0909091  | 5  | 6  | 5  | 29.9  | 9.73  | 149 | 5  |
| P51572     | B-cell receptor                                  | 28.8617886  | 6  | 9  | 6  | 28    | 8.44  | 164 | 6  |
| Q53FE8     | cDNA FLJ36117.8378378                            | 17.8378378  | 4  | 5  | 4  | 40.5  | 5.14  | 186 | 4  |
| Q00325     | Phosphate-activated kinase                       | 25.6906077  | 10 | 14 | 10 | 40.1  | 9.38  | 228 | 10 |
| AOA0S2Z5I7 | Shwachman-Bodian-Diamond syndrome protein        | 34          | 7  | 8  | 7  | 28.7  | 8.75  | 151 | 7  |
| Q92917     | G patch domain protein                           | 32.1428571  | 9  | 9  | 9  | 52.2  | 6.15  | 121 | 9  |
| O60664     | Perilipin-1                                      | 19.124424   | 5  | 6  | 5  | 47    | 5.44  | 140 | 5  |
| Q6NUK1     | Calcium-binding protein                          | 22.4318658  | 10 | 11 | 10 | 53.3  | 6.33  | 142 | 10 |
| P84085     | ADP-ribosylation factor 1                        | 14.7777778  | 6  | 7  | 2  | 20.5  | 6.79  | 238 | 6  |
| P61160     | Actin-related protein 2.3                        | 24.6192893  | 7  | 7  | 7  | 44.7  | 6.74  | 166 | 7  |
| Q9UBS4     | DnaJ homologue 1                                 | 9.21787709  | 2  | 5  | 2  | 40.5  | 6.18  | 177 | 2  |
| Q6IAW5     | CALU protein                                     | 18.0952381  | 4  | 6  | 4  | 37.1  | 4.64  | 127 | 4  |
| O15160     | DNA-directed RNA polymerase III                  | 24.2774566  | 6  | 6  | 6  | 39.2  | 5.5   | 181 | 6  |
| Q52LJ0     | Protein FAM111                                   | 11.2121212  | 3  | 4  | 3  | 37.2  | 6.29  | 217 | 3  |
| Q92688     | Acidic leucine-rich glycoprotein                 | 22.310757   | 10 | 14 | 4  | 28.8  | 4.06  | 230 | 10 |
| AOA0C4DG89 | Probable A112                                    | 12.9844961  | 11 | 12 | 11 | 117.4 | 9.29  | 127 | 11 |
| Q53GS9     | U4/U6.U5 tri-snRNP                               | 17.1681416  | 7  | 8  | 7  | 65.3  | 8.91  | 143 | 7  |
| Q9UBB4     | Ataxin-10                                        | 16.4210526  | 6  | 8  | 6  | 53.5  | 5.25  | 145 | 6  |
| O75340     | Programmed cell death 1                          | 34.0314136  | 5  | 9  | 5  | 21.9  | 5.4   | 199 | 5  |
| P42677     | 40S ribosomal protein S19                        | 40.4761905  | 4  | 9  | 2  | 9.5   | 9.45  | 138 | 4  |
| Q9BTT0     | Acidic leucine-rich glycoprotein                 | 16.0447761  | 4  | 5  | 4  | 30.7  | 3.85  | 197 | 4  |
| Q13045     | Protein fli8                                     | 18.35303388 | 7  | 10 | 7  | 144.7 | 6.05  | 187 | 7  |
| B2R791     | cDNA, FLJ9115.4166667                            | 15.4166667  | 5  | 8  | 5  | 77.5  | 9.5   | 138 | 5  |
| Q9BTE3     | Mini-chromosome maintenance protein              | 12.9283489  | 7  | 8  | 7  | 72.9  | 5.87  | 88  | 7  |
| Q01844     | RNA-binding protein                              | 7.31707317  | 3  | 6  | 3  | 68.4  | 9.33  | 115 | 3  |
| P47756     | F-actin-capping protein                          | 32.4909747  | 6  | 6  | 6  | 31.3  | 5.59  | 138 | 6  |
| B2R5M8     | Isocitrate dehydrogenase                         | 24.1545894  | 8  | 9  | 8  | 46.6  | 7.01  | 176 | 8  |
| AOA024ROM6 | Translocase                                      | 9.86842105  | 3  | 5  | 3  | 50.4  | 9.42  | 156 | 3  |
| P61011     | Signal receptor                                  | 17.4603175  | 6  | 8  | 6  | 55.7  | 8.75  | 119 | 6  |
| AOA1POAYU5 | Sideroflexin                                     | 24.3076923  | 6  | 6  | 5  | 36    | 9.09  | 120 | 6  |
| Q9P287     | BRCA2 and Fanconi anemia complementation group C | 22.2929936  | 4  | 5  | 4  | 36    | 4.61  | 191 | 4  |
| F8VVA7     | Coatomer subunit 1                               | 31.3131313  | 4  | 5  | 4  | 22.3  | 4.89  | 116 | 4  |

|            |              |              |    |    |    |       |       |     |    |
|------------|--------------|--------------|----|----|----|-------|-------|-----|----|
| A0A0C4DFL7 | Lanosterol   | 15.7170923   | 8  | 8  | 8  | 57.2  | 8.53  | 144 | 8  |
| Q8TCJ2     | Dolichyl-dj7 | 1.14285714   | 6  | 7  | 6  | 93.6  | 8.91  | 162 | 6  |
| P61326     | Protein ma   | 36.3013699   | 5  | 8  | 1  | 17.2  | 6.11  | 161 | 5  |
| B011T2     | Unconventic  | 8.54616896   | 6  | 6  | 6  | 116.4 | 8.73  | 119 | 6  |
| Q03252     | Lamin-B2     | 0510.9677419 | 7  | 8  | 4  | 69.9  | 5.59  | 194 | 7  |
| P52948     | Nuclear por  | 5.50357733   | 8  | 8  | 8  | 197.5 | 6.4   | 127 | 8  |
| P13647     | Keratin, ty  | 10           | 7  | 9  | 2  | 62.3  | 7.74  | 209 | 7  |
| A0A023T6R1 | Mago nashi   | 36.4864865   | 5  | 9  | 1  | 17.3  | 6.39  | 154 | 5  |
| P15559     | NAD(P)H del  | 21.8978102   | 5  | 7  | 5  | 30.8  | 8.88  | 90  | 5  |
| P26358     | DNA (cytosi  | 7.85891089   | 10 | 10 | 10 | 183.1 | 7.75  | 126 | 10 |
| Q14684     | Ribosomal F  | 15.0395778   | 9  | 10 | 9  | 84.4  | 9.76  | 100 | 9  |
| C9JIF9     | Acylamino-ε  | 10.7191316   | 6  | 6  | 6  | 81.6  | 5.54  | 126 | 6  |
| P46063     | ATP-depend   | 18.6440678   | 7  | 7  | 7  | 73.4  | 7.88  | 71  | 7  |
| A0A024R7M0 | Transmembr   | 18.2978723   | 3  | 6  | 2  | 27.3  | 8.02  | 128 | 3  |
| A8K964     | cDNA FLJ75   | 9.90237099   | 6  | 9  | 6  | 81.5  | 7.37  | 95  | 6  |
| Q15050     | Ribosome bi  | 23.0136986   | 7  | 8  | 7  | 41.2  | 10.7  | 161 | 7  |
| P46783     | 40S riboson  | 49.0909091   | 8  | 11 | 7  | 18.9  | 10.15 | 144 | 8  |
| Q6FII1     | Glutathione  | 26.9911504   | 5  | 6  | 5  | 25.5  | 8.41  | 140 | 5  |
| L7RXH5     | Mitogen-act  | 23.4828496   | 6  | 9  | 4  | 43.1  | 6.74  | 109 | 6  |
| Q8TC12     | Retinol del  | 22.9559748   | 6  | 6  | 6  | 35.4  | 8.82  | 196 | 6  |
| Q15067     | Peroxisomal  | 20.4545455   | 8  | 8  | 8  | 74.4  | 8.16  | 133 | 8  |
| P08240     | Signal rec   | 14.2633229   | 7  | 8  | 7  | 69.8  | 8.95  | 158 | 7  |
| Q9UN52     | COP9 signa   | 14.1843972   | 4  | 5  | 4  | 47.8  | 6.65  | 162 | 4  |
| Q5SSJ5     | Heterochron  | 12.477396    | 6  | 7  | 6  | 61.2  | 9.67  | 150 | 6  |
| P53618     | Coatomer st  | 12.8016789   | 8  | 9  | 8  | 107.1 | 6.05  | 111 | 8  |
| P08134     | Rho-relate   | 26.4248705   | 6  | 8  | 1  | 22    | 6.58  | 162 | 6  |
| Q9UHD1     | Cysteine ar  | 31.0240964   | 8  | 8  | 8  | 37.5  | 7.87  | 118 | 8  |
| Q14258     | E3 ubiquiti  | 15.5555556   | 8  | 9  | 1  | 70.9  | 8.09  | 160 | 8  |
| P08754     | Guanine nuc  | 17.2316384   | 5  | 6  | 4  | 40.5  | 5.69  | 197 | 5  |
| P09543     | 2',3'-cycli  | 19.0023753   | 5  | 5  | 5  | 47.5  | 9.07  | 152 | 5  |
| Q99567     | Nuclear poi  | 12.2807018   | 6  | 7  | 6  | 83.5  | 5.69  | 128 | 6  |
| A8K3Q9     | cDNA FLJ76   | 25.462963    | 5  | 10 | 1  | 23.4  | 10.93 | 250 | 5  |
| P31350     | Ribonucleo   | 26.9922879   | 8  | 9  | 8  | 44.8  | 5.38  | 109 | 8  |
| Q9H1E3     | Nuclear ubi  | 16.872428    | 6  | 8  | 6  | 27.3  | 5.08  | 97  | 6  |
| A0A023T787 | RNA-binding  | 33.3333333   | 4  | 6  | 4  | 19.9  | 5.72  | 121 | 4  |
| Q9NQW7     | Xaa-Pro ami  | 22.4719101   | 9  | 10 | 9  | 69.9  | 5.67  | 97  | 9  |
| Q9GZZ9     | Ubiquitin-1  | 17.5742574   | 4  | 4  | 4  | 44.8  | 4.84  | 201 | 4  |
| Q5JTV8     | Torsin-1A-i  | 17.3241852   | 7  | 7  | 7  | 66.2  | 8.18  | 130 | 7  |
| P61513     | 60S riboson  | 59.7826087   | 6  | 11 | 6  | 10.3  | 10.43 | 110 | 6  |
| Q7KZ85     | Transcript   | 9.09617613   | 9  | 10 | 9  | 198.9 | 4.91  | 119 | 9  |
| P55809     | Succinyl-C   | 18.0769231   | 8  | 8  | 8  | 56.1  | 7.46  | 144 | 8  |
| P51648     | Fatty alde   | 23.2989691   | 9  | 10 | 8  | 54.8  | 7.88  | 128 | 9  |
| A0A0S2Z4Z6 | Serine/argi  | 6.97167756   | 3  | 6  | 3  | 103.9 | 11.84 | 223 | 3  |
| P62851     | 40S riboson  | 43.2         | 7  | 13 | 7  | 13.7  | 10.11 | 255 | 7  |
| Q14690     | Protein RRF  | 7.3757349    | 10 | 10 | 10 | 208.6 | 8.87  | 119 | 10 |
| P62834     | Ras-relate   | 30.9782609   | 6  | 6  | 6  | 21    | 6.67  | 193 | 6  |
| E7ETY2     | Treacle prc  | 7.86290323   | 9  | 9  | 9  | 152.2 | 8.85  | 168 | 9  |
| Q9NZI8     | Insulin-lil  | 10.5719237   | 4  | 6  | 3  | 63.4  | 9.2   | 219 | 4  |
| A8K548     | cDNA FLJ75   | 8.5840708    | 6  | 6  | 6  | 119.6 | 4.34  | 63  | 6  |
| Q9BXY0     | Protein MA   | 19           | 4  | 4  | 4  | 35.3  | 5.38  | 165 | 4  |
| O00116     | Alkyldihyd   | 15.1975684   | 8  | 9  | 8  | 72.9  | 7.34  | 102 | 8  |
| O00764     | Pyridoxal    | 12.1794872   | 2  | 3  | 2  | 35.1  | 6.13  | 160 | 2  |
| Q92804     | TATA-bind    | 14.0202703   | 5  | 13 | 3  | 61.8  | 8.02  | 123 | 5  |
| O94826     | Mitochondri  | 17.5986842   | 7  | 7  | 7  | 67.4  | 7.12  | 66  | 7  |
| Q59GW5     | Tripartite   | 15.5279503   | 8  | 10 | 1  | 72.2  | 8.06  | 138 | 8  |
| P35221     | Catenin alp  | 8.49889625   | 5  | 5  | 5  | 100   | 6.29  | 176 | 5  |
| Q13148     | TAR DNA-bi   | 20.7729469   | 5  | 6  | 5  | 44.7  | 6.19  | 188 | 5  |
| D2CFK9     | Nucleolar    | 13.2492114   | 8  | 8  | 3  | 73.9  | 9.5   | 145 | 8  |
| B5BUD2     | Replicatio   | 24.8587571   | 6  | 7  | 6  | 39.2  | 6.44  | 107 | 6  |
| Q6FGG2     | VAMP3 prote  | 49           | 3  | 5  | 3  | 11.3  | 8.79  | 151 | 3  |
| Q8N7H5     | RNA polym    | 15.6308851   | 6  | 7  | 6  | 59.9  | 4.63  | 83  | 6  |
| Q9Y6E2     | Basic leuci  | 16.7064439   | 7  | 9  | 6  | 48.1  | 6.68  | 157 | 7  |
| O95202     | LETM1 and    | 14.0730717   | 7  | 7  | 7  | 83.3  | 6.7   | 114 | 7  |
| A0A024QZK8 | Heterogenec  | 21.9653179   | 4  | 6  | 4  | 36.9  | 6.87  | 150 | 4  |
| O75436     | Vacuolar pi  | 18.6544343   | 4  | 5  | 4  | 38.1  | 6.57  | 82  | 4  |
| P55084     | Trifunctio   | 22.5738397   | 10 | 10 | 10 | 51.3  | 9.41  | 50  | 10 |
| Q9BZZ5     | Apoptosis    | 15.8396947   | 5  | 5  | 5  | 59    | 7.34  | 105 | 5  |
| P15531     | Nucleoside   | 28.2894737   | 3  | 8  | 1  | 17.1  | 6.19  | 139 | 3  |
| O94776     | Metastasis   | -12.5748503  | 6  | 6  | 6  | 75    | 9.66  | 115 | 6  |
| Q12996     | Cleavage st  | 13.6680614   | 6  | 6  | 6  | 82.9  | 8.12  | 125 | 6  |
| Q9Y3F4     | Serine-thre  | 30.5714286   | 6  | 8  | 6  | 38.4  | 5.12  | 71  | 6  |
| Q05048     | Cleavage st  | 13.4570766   | 4  | 5  | 4  | 48.3  | 6.58  | 156 | 4  |
| Q9NT62     | Ubiquitin-1  | 15.2866242   | 5  | 5  | 5  | 35.8  | 4.74  | 173 | 5  |



|            |                       |              |   |    |   |       |       |     |   |
|------------|-----------------------|--------------|---|----|---|-------|-------|-----|---|
| P42224     | Signal tran           | 10           | 6 | 7  | 6 | 87.3  | 6.05  | 147 | 6 |
| Q96B97     | SH3 domain-12.9323308 |              | 6 | 6  | 6 | 73.1  | 6.62  | 158 | 6 |
| Q14318     | Peptidyl-p111.1650485 |              | 3 | 3  | 3 | 44.5  | 4.84  | 203 | 3 |
| Q16822     | Phosphoenol           | 19.375       | 8 | 8  | 8 | 70.7  | 7.62  | 128 | 8 |
| Q9NYU2     | UDP-glucose           | 10.096463    | 9 | 10 | 9 | 177.1 | 5.63  | 93  | 9 |
| Q9HCE1     | Putative hc           | 10.9670987   | 8 | 8  | 8 | 113.6 | 8.82  | 106 | 8 |
| B2RDQ3     | cDNA, FLJ9            | 25.6944444   | 6 | 8  | 6 | 33.7  | 11.25 | 110 | 6 |
| P09234     | U1 small nt           | 12.5786164   | 2 | 4  | 2 | 17.4  | 9.67  | 106 | 2 |
| A8K070     | COP9 signal           | 18.6311787   | 7 | 7  | 7 | 58.9  | 6.32  | 82  | 7 |
| Q9Y266     | Nuclear mi            | 18.1268882   | 7 | 8  | 7 | 38.2  | 5.38  | 153 | 7 |
| G3V5T9     | Cyclin-depe           | 21.0982659   | 7 | 8  | 5 | 39.2  | 8.62  | 186 | 7 |
| P13674     | Prolyl 4-hy           | 7.86516854   | 3 | 5  | 3 | 61    | 6.01  | 126 | 3 |
| Q7Z7H5     | Transmembr            | 18.9427313   | 3 | 5  | 2 | 25.9  | 8.28  | 127 | 3 |
| Q15758     | Neutral ami           | 13.6783734   | 6 | 8  | 6 | 56.6  | 5.48  | 125 | 6 |
| P04040     | Catalase O            | 7.77988615   | 3 | 3  | 3 | 59.7  | 7.39  | 86  | 3 |
| J3KQN4     | 60S ribosom           | 25.3521127   | 8 | 10 | 2 | 16.4  | 10.43 | 136 | 8 |
| Q59EF6     | Calpain 2,            | 11.1111111   | 6 | 7  | 6 | 83.1  | 5.06  | 68  | 6 |
| F8WAR4     | MICOS comp            | 23.2365145   | 5 | 6  | 5 | 27.7  | 6.64  | 140 | 5 |
| P56537     | Eukaryotic            | 37.1428571   | 5 | 8  | 5 | 26.6  | 4.68  | 118 | 5 |
| AOA140VJK1 | Testicular            | 21.1940299   | 4 | 5  | 4 | 37.4  | 5.39  | 150 | 4 |
| AOA0B4J2E5 | Uncharacter           | 6.42002176   | 4 | 7  | 4 | 102.4 | 6.2   | 134 | 4 |
| P21399     | Cytoplasmic           | 13.3858268   | 9 | 10 | 9 | 98.3  | 6.68  | 126 | 9 |
| Q6PKG0     | La-related            | 8.57664234   | 6 | 7  | 4 | 123.4 | 8.82  | 59  | 6 |
| O60869     | Endothelial           | 31.7567568   | 5 | 6  | 5 | 16.4  | 9.95  | 140 | 5 |
| P51571     | Translocon            | 23.699422    | 4 | 7  | 4 | 19    | 6.15  | 178 | 4 |
| Q6IAX1     | FDFT1 prot            | 14.6282974   | 6 | 7  | 6 | 48.1  | 6.54  | 98  | 6 |
| AOA024RDE5 | Ras-GTPase            | 15.3526971   | 5 | 7  | 4 | 54.1  | 5.55  | 77  | 5 |
| P60891     | Ribose-pho            | 15.408805    | 5 | 6  | 3 | 34.8  | 6.98  | 120 | 5 |
| Q9NW13     | RNA-binding           | 7.90513834   | 5 | 5  | 5 | 85.7  | 9.22  | 149 | 5 |
| Q9NP79     | Vacuolar pi           | 21.4983713   | 4 | 7  | 4 | 33.9  | 6.29  | 190 | 4 |
| AOA0S2Z404 | Regulator c           | 32.5221239   | 7 | 7  | 7 | 48.1  | 8.16  | 157 | 7 |
| Q15631     | Translin O            | 25           | 5 | 7  | 5 | 26.2  | 6.44  | 152 | 5 |
| O00193     | Small acidi           | 25.136612    | 3 | 5  | 3 | 20.3  | 4.72  | 142 | 3 |
| P40938     | Replicatio            | 16.2921348   | 5 | 6  | 5 | 40.5  | 8.34  | 113 | 5 |
| Q8TEQ6     | Gem-associ            | 7.36074271   | 6 | 6  | 6 | 168.5 | 6.62  | 105 | 6 |
| AOA087X1Z3 | Proteasome            | 28.3464567   | 6 | 6  | 6 | 29.1  | 6.71  | 175 | 6 |
| Q9NZL4     | Hsp70-bind            | 24.0331492   | 6 | 7  | 6 | 39.4  | 5.21  | 148 | 6 |
| O75306     | NADH dehyd            | 16.8466523   | 6 | 7  | 6 | 52.5  | 7.55  | 136 | 6 |
| AOA140VJJ2 | S-formylgl            | 26.2411348   | 5 | 7  | 5 | 31.4  | 7.02  | 105 | 5 |
| B2RDZ9     | cDNA, FLJ9            | 16.838488    | 3 | 4  | 3 | 31.9  | 5.27  | 153 | 3 |
| P08574     | Cytochrome            | 16.6153846   | 4 | 13 | 4 | 35.4  | 9     | 85  | 4 |
| P07741     | Adenine ph            | 47.2222222   | 6 | 10 | 6 | 19.6  | 6.02  | 156 | 6 |
| Q04837     | Single-str            | 49.3243243   | 6 | 7  | 6 | 17.2  | 9.6   | 107 | 6 |
| Q969G3     | SWI/SNF-re            | 15.5717762   | 5 | 5  | 5 | 46.6  | 4.88  | 191 | 5 |
| Q9H583     | HEAT repea            | 4.52425373   | 8 | 8  | 6 | 242.2 | 6.54  | 87  | 8 |
| Q2NL82     | Pre-rRNA-p            | 8.33333333   | 5 | 6  | 5 | 91.8  | 7.42  | 109 | 5 |
| B3KMV8     | cDNA FLJ1             | 10.9144543   | 6 | 7  | 2 | 74.7  | 8.38  | 149 | 6 |
| P62273     | 40S ribosom           | 32.1428571   | 2 | 8  | 2 | 6.7   | 10.13 | 168 | 2 |
| Q9BRP8     | Partner of            | 43.627451    | 6 | 8  | 6 | 22.6  | 9.45  | 111 | 6 |
| P18085     | ADP-ribosyl           | 40           | 5 | 7  | 2 | 20.5  | 7.14  | 184 | 5 |
| Q5TFE4     | 5'-nucleoti           | 20.2197802   | 7 | 8  | 7 | 51.8  | 6.35  | 94  | 7 |
| A6NHR9     | Structural            | 6.03491272   | 9 | 9  | 9 | 226.2 | 7.3   | 122 | 9 |
| Q6XQN6     | Nicotinate            | 14.3122677   | 5 | 6  | 5 | 57.5  | 5.68  | 89  | 5 |
| O43615     | Mitochondri           | 16.3716814   | 7 | 7  | 7 | 51.3  | 8.32  | 127 | 7 |
| A6NDG6     | Glycerol-3            | -25.5451713  | 6 | 7  | 6 | 34    | 6.14  | 143 | 6 |
| Q08ET0     | Cell prolif           | 18.359375    | 4 | 6  | 4 | 28.9  | 9.36  | 89  | 4 |
| B4E0L0     | cDNA FLJ5             | 422.8310502  | 6 | 7  | 6 | 48.1  | 9.92  | 115 | 6 |
| P28288     | ATP-binding           | 10.1669196   | 5 | 6  | 5 | 75.4  | 9.36  | 115 | 5 |
| P28070     | Proteasome            | 28.030303    | 6 | 6  | 6 | 29.2  | 5.97  | 71  | 6 |
| Q9NZ45     | CDGSH iron            | -42.5925926  | 4 | 7  | 4 | 12.2  | 9.09  | 176 | 4 |
| P50402     | Emerin OS             | =127.5590551 | 5 | 6  | 5 | 29    | 5.5   | 107 | 5 |
| Q96EN8     | Molybdenum            | 7.43243243   | 5 | 7  | 5 | 98.1  | 6.7   | 105 | 5 |
| HOYEH1     | Phosphatidy           | 17.2077922   | 2 | 3  | 1 | 32.2  | 8.31  | 149 | 2 |
| AOA024RDG1 | Vesicle doc           | 6.34095634   | 5 | 6  | 5 | 107.8 | 4.91  | 186 | 5 |
| P10586     | Receptor-ty           | 5.34871526   | 7 | 7  | 7 | 212.7 | 6.3   | 93  | 7 |
| Q92769     | Histone de            | 12.295082    | 5 | 6  | 1 | 55.3  | 5.91  | 112 | 5 |
| Q02750     | Dual specif           | 15.0127226   | 5 | 7  | 3 | 43.4  | 6.62  | 164 | 5 |
| Q8WXX5     | DnaJ homol            | c26.9230769  | 6 | 7  | 6 | 29.9  | 5.73  | 113 | 6 |
| O94973     | AP-2 compl            | c4.79233227  | 4 | 5  | 2 | 103.9 | 6.96  | 116 | 4 |
| P00403     | Cytochrome            | 23.3480176   | 4 | 5  | 4 | 25.5  | 4.82  | 123 | 4 |
| B2R4R9     | HCG26477 O            | c31.884058   | 5 | 6  | 5 | 7.8   | 10.7  | 94  | 5 |
| Q96CT7     | Coiled-coil           | 31.3901345   | 5 | 8  | 5 | 25.8  | 9.54  | 174 | 5 |
| Q01581     | Hydroxymet            | 18.2692308   | 5 | 6  | 5 | 57.3  | 5.41  | 93  | 5 |

|            |                        |   |    |   |       |       |     |   |
|------------|------------------------|---|----|---|-------|-------|-----|---|
| P51114     | Fragile X n11.7552335  | 6 | 7  | 5 | 69.7  | 6.15  | 98  | 6 |
| P09661     | U2 small nt16.8627451  | 5 | 6  | 5 | 28.4  | 8.62  | 136 | 5 |
| AOA024R571 | EH domain-c15.5109489  | 5 | 7  | 4 | 61.9  | 6.71  | 88  | 5 |
| Q00059     | Transcripti27.2357724  | 6 | 6  | 6 | 29.1  | 9.72  | 116 | 6 |
| 014929     | Histone acc12.4105012  | 5 | 5  | 5 | 49.5  | 5.69  | 148 | 5 |
| Q59HG1     | Chromosome-6.55870445  | 6 | 6  | 6 | 140.3 | 6.27  | 116 | 6 |
| Q53GG0     | Epithelial 13.8339921  | 7 | 7  | 7 | 85.2  | 6.84  | 84  | 7 |
| 014617     | AP-3 comple4.24978317  | 2 | 3  | 2 | 130.1 | 8.48  | 107 | 2 |
| B4DWA0     | cDNA FLJ5417.62195122  | 1 | 11 | 1 | 34.3  | 10.37 | 56  | 1 |
| AOA024R7I3 | RAB8A, mem1 31.884058  | 6 | 7  | 3 | 23.7  | 9.07  | 229 | 6 |
| Q13561     | Dynactin st32.1695761  | 6 | 6  | 6 | 44.2  | 5.21  | 94  | 6 |
| G1UI16     | SCC-112 prc5.98354525  | 5 | 6  | 5 | 150.7 | 7.91  | 136 | 5 |
| Q13057     | Bifunction16.1347518   | 6 | 6  | 6 | 62.3  | 6.99  | 81  | 6 |
| P25685     | DnaJ homolc14.7058824  | 4 | 4  | 3 | 38    | 8.63  | 185 | 4 |
| Q9BS26     | Endoplasmic20.6896552  | 6 | 6  | 6 | 46.9  | 5.26  | 98  | 6 |
| P01111     | GTPase NRa26.4550265   | 4 | 4  | 3 | 21.2  | 5.17  | 158 | 4 |
| B2RB47     | AMP deamin8.53242321   | 7 | 8  | 7 | 100.7 | 6.93  | 83  | 7 |
| Q9Y2L1     | Exosome con7.09812109  | 4 | 6  | 4 | 108.9 | 7.14  | 95  | 4 |
| B3KMR5     | cDNA FLJ127.40169622   | 8 | 8  | 8 | 143.6 | 8.75  | 139 | 8 |
| Q86UE4     | Protein LYF9.79381443  | 3 | 4  | 3 | 63.8  | 9.32  | 114 | 3 |
| P53992     | Protein tr9.87202925   | 8 | 8  | 8 | 118.2 | 7.06  | 133 | 8 |
| V9HW63     | Epididymis 21.0332103  | 4 | 7  | 2 | 30.5  | 6.29  | 103 | 4 |
| P40222     | Alpha-taxil22.8937729  | 7 | 10 | 7 | 61.9  | 6.52  | 50  | 7 |
| Q12769     | Nuclear por4.94428969  | 5 | 5  | 1 | 162   | 5.5   | 70  | 5 |
| Q16795     | NADH dehyd18.8328912   | 7 | 8  | 7 | 42.5  | 9.8   | 131 | 7 |
| Q59G24     | Activated F47.0149254  | 6 | 7  | 6 | 15.1  | 9.38  | 116 | 6 |
| P21964     | Catechol O-19.1881919  | 4 | 6  | 4 | 30    | 5.47  | 40  | 4 |
| P47813     | Eukaryotic 36.1111111  | 5 | 7  | 5 | 16.5  | 5.24  | 157 | 5 |
| 095782     | AP-2 comple 4.5035824  | 4 | 5  | 2 | 107.5 | 7.03  | 128 | 4 |
| Q96G03     | Phosphogluc10.4575163  | 4 | 5  | 4 | 68.2  | 6.73  | 98  | 4 |
| Q9H3U1     | Protein uncl0.8050847  | 6 | 6  | 6 | 103   | 6.07  | 54  | 6 |
| Q14694     | Ubiquitin c13.4085213  | 7 | 7  | 7 | 87.1  | 5.31  | 121 | 7 |
| H3BN98     | Uncharacter27.0042194  | 7 | 8  | 3 | 27.2  | 9.55  | 155 | 7 |
| AOA140VK69 | Aspartate 16.2227603   | 5 | 6  | 5 | 46.2  | 7.01  | 100 | 5 |
| B2R7B5     | cDNA, FLJ922.3476298   | 7 | 9  | 7 | 48.2  | 8.66  | 79  | 7 |
| AOA024R094 | Poly(A) bir23.2026144  | 4 | 5  | 4 | 35    | 4.79  | 131 | 4 |
| 075937     | DnaJ homolc29.2490119  | 6 | 7  | 6 | 29.8  | 9.06  | 132 | 6 |
| 075844     | CAAX prenyl11.1578947  | 5 | 6  | 5 | 54.8  | 7.49  | 107 | 5 |
| AOA087X1W2 | Protein ar25.9649123   | 4 | 5  | 1 | 32.7  | 5.68  | 95  | 4 |
| 075475     | PC4 and SF8.86792453   | 4 | 7  | 3 | 60.1  | 9.13  | 154 | 4 |
| 094906     | Pre-mRNA-pi10.9458023  | 8 | 8  | 8 | 106.9 | 8.25  | 109 | 8 |
| B4DP80     | NAD(P)H-hyc20.1954397  | 4 | 7  | 4 | 33.6  | 8.73  | 106 | 4 |
| Q6P2E9     | Enhancer of7.13775874  | 6 | 6  | 6 | 151.6 | 5.86  | 85  | 6 |
| 060747     | Putative G-11.5658363  | 6 | 7  | 1 | 65.4  | 9.17  | 95  | 6 |
| AOA0S2Z5M8 | ElaC homolc 8.3535109  | 6 | 6  | 6 | 92.2  | 7.9   | 75  | 6 |
| 015042     | U2 snRNP-a2 9.1350826  | 6 | 7  | 6 | 118.2 | 8.47  | 120 | 6 |
| Q13501     | Sequestoson24.3181818  | 5 | 5  | 5 | 47.7  | 5.22  | 62  | 5 |
| P61026     | Ras-relatec 20         | 4 | 6  | 2 | 22.5  | 8.38  | 219 | 4 |
| J3QLS3     | 28S riboson18.0811808  | 4 | 5  | 4 | 31.7  | 9.86  | 121 | 4 |
| Q9Y3U8     | 60S riboson33.3333333  | 5 | 7  | 5 | 12.2  | 11.59 | 166 | 5 |
| 000566     | U3 small nt17.7679883  | 7 | 8  | 7 | 78.8  | 4.86  | 52  | 7 |
| Q8NI36     | WD repeat-c9.98948475  | 6 | 10 | 6 | 105.3 | 7.53  | 148 | 6 |
| P61956     | Small ubiq33.6842105   | 3 | 6  | 3 | 10.9  | 5.5   | 179 | 3 |
| Q05CW7     | NAT10 prote11.0108303  | 5 | 6  | 1 | 62.3  | 9.26  | 111 | 5 |
| Q13895     | Bystin OS=120.8237986  | 7 | 7  | 7 | 49.6  | 8.12  | 113 | 7 |
| B2R4V2     | cDNA, FLJ9233.0188679  | 7 | 9  | 1 | 12.5  | 10.65 | 89  | 7 |
| Q53R19     | Arp2/3 com13.6666667   | 4 | 5  | 4 | 34.3  | 7.36  | 106 | 4 |
| B2R6R6     | Serine/thrc19.6392786  | 6 | 7  | 6 | 56.8  | 6.16  | 123 | 6 |
| Q00688     | Peptidyl-pr 18.75      | 5 | 7  | 5 | 25.2  | 9.28  | 43  | 5 |
| 015260     | Surfeit loc17.8438662  | 4 | 4  | 4 | 30.4  | 7.78  | 138 | 4 |
| P30048     | Thioredoxir 26.5625    | 4 | 5  | 4 | 27.7  | 7.78  | 97  | 4 |
| Q9UKY7     | Protein CD\ 30.620155  | 4 | 7  | 4 | 27.3  | 6.4   | 82  | 4 |
| Q3LXA3     | Triokinase,10.4347826  | 5 | 7  | 5 | 58.9  | 7.49  | 130 | 5 |
| Q549N0     | Cofilin 2 +42.1686747  | 6 | 7  | 2 | 18.7  | 7.88  | 151 | 6 |
| P20339     | Ras-relatec25.1162791  | 4 | 6  | 2 | 23.6  | 8.15  | 113 | 4 |
| P10644     | cAMP-dependc13.9107612 | 4 | 4  | 4 | 43    | 5.35  | 100 | 4 |
| AOA024R8E4 | Chromosome 13.4529148  | 3 | 3  | 3 | 25.4  | 5.52  | 114 | 3 |
| Q9NQ29     | Putative R14.8247978   | 5 | 7  | 1 | 43.7  | 9.92  | 99  | 5 |
| F8W727     | 60S riboson 37.254902  | 5 | 9  | 5 | 18    | 10.59 | 168 | 5 |
| AOA140VK92 | Secretory c9.72644377  | 2 | 4  | 2 | 36.6  | 6.1   | 130 | 2 |
| Q9H2G2     | STE20-like 6.47773279  | 7 | 7  | 2 | 142.6 | 5.15  | 114 | 7 |
| Q9NUQ9     | Protein FA13.8888889   | 3 | 4  | 3 | 36.7  | 6.06  | 85  | 3 |
| P05204     | Non-histone45.5555556  | 2 | 7  | 2 | 9.4   | 9.99  | 44  | 2 |

|            |                        |   |   |   |       |       |     |   |
|------------|------------------------|---|---|---|-------|-------|-----|---|
| P49720     | Proteasome 23.4146341  | 3 | 5 | 3 | 22.9  | 6.55  | 131 | 3 |
| Q14573     | Inositol 1,4.64245601  | 9 | 9 | 9 | 303.9 | 6.48  | 75  | 9 |
| Q8N684     | Cleavage ar16.7728238  | 6 | 6 | 6 | 52    | 8     | 104 | 6 |
| Q61CQ8     | ARHG protei31.9371728  | 5 | 6 | 4 | 21.3  | 8.12  | 126 | 5 |
| 000767     | Acyl-CoA d12.2562674   | 3 | 4 | 3 | 41.5  | 9     | 112 | 3 |
| HOVMV8     | 40S ribosom 34         | 4 | 8 | 2 | 11.3  | 9.32  | 114 | 4 |
| Q9NWH9     | SAFB-like 17.83365571  | 6 | 6 | 6 | 117.1 | 7.87  | 134 | 6 |
| Q9Y333     | U6 snRNA-ac21.0526316  | 2 | 3 | 2 | 10.8  | 6.52  | 100 | 2 |
| E9PCR7     | 2-oxoglutar7.41811175  | 5 | 5 | 5 | 117.6 | 6.92  | 133 | 5 |
| 000469     | Procollagen10.1763908  | 5 | 6 | 5 | 84.6  | 6.71  | 115 | 5 |
| Q59FD4     | Hexokinase 6.95468915  | 6 | 6 | 4 | 105.7 | 6.84  | 129 | 6 |
| F8VXC8     | SWI/SNF com 3.7751004  | 3 | 4 | 2 | 136.1 | 5.71  | 92  | 3 |
| F8WCF6     | Actin-relat27.6243094  | 6 | 7 | 6 | 21    | 8.76  | 152 | 6 |
| 060443     | Non-syndron14.3145161  | 4 | 5 | 4 | 54.5  | 5.17  | 67  | 4 |
| P62495     | Eukaryotic 18.5354691  | 6 | 7 | 6 | 49    | 5.71  | 81  | 6 |
| Q96GQ7     | Probable A19.54773869  | 6 | 6 | 6 | 89.8  | 9.28  | 92  | 6 |
| Q16630     | Cleavage ar 5.4446461  | 2 | 3 | 2 | 59.2  | 7.15  | 180 | 2 |
| P21266     | Glutathione 24         | 5 | 5 | 5 | 26.5  | 5.54  | 131 | 5 |
| B4DZC9     | cDNA FLJ616.29770992   | 6 | 6 | 1 | 119.8 | 4.91  | 116 | 6 |
| AOA140VK41 | Testicular 18.3800623  | 4 | 5 | 2 | 35    | 6.46  | 91  | 4 |
| AOA140VK11 | ClpB caseir11.3154173  | 5 | 5 | 5 | 78.7  | 9.01  | 106 | 5 |
| P36952     | Serpin B5 (17.0666667  | 5 | 7 | 5 | 42.1  | 6.05  | 111 | 5 |
| 060488     | Long-chain-13.0801688  | 6 | 6 | 4 | 79.1  | 8.38  | 83  | 6 |
| AOA0AOMTJ9 | Neutral chr11.6071429  | 4 | 4 | 4 | 49.9  | 7.21  | 116 | 4 |
| P55735     | Protein SEC23.9130435  | 4 | 4 | 4 | 35.5  | 5.48  | 82  | 4 |
| B7Z6Z4     | Myosin lig29.8319328   | 5 | 6 | 5 | 26.7  | 5.08  | 76  | 5 |
| G3V198     | Nuclear por5.17503805  | 5 | 5 | 1 | 148.9 | 5.57  | 82  | 5 |
| P46977     | Dolichyl-di8.36879433  | 6 | 7 | 6 | 80.5  | 8.07  | 115 | 6 |
| Q9BTD8     | RNA-binding15.4166667  | 4 | 5 | 4 | 50.4  | 9.63  | 98  | 4 |
| B2RAH7     | cDNA, FLJ9.8.45070423  | 4 | 4 | 4 | 80.7  | 5.86  | 101 | 4 |
| Q14527     | Helicase-li7.92864222  | 6 | 8 | 6 | 113.9 | 8.6   | 69  | 6 |
| AOA024R8R4 | Nuclear prc11.5131579  | 5 | 5 | 5 | 68.1  | 6.38  | 80  | 5 |
| Q8WX93     | Palladin 05.92913955   | 5 | 5 | 5 | 150.5 | 7.09  | 133 | 5 |
| P48507     | Glutamate--16.0583942  | 3 | 4 | 3 | 30.7  | 6.02  | 128 | 3 |
| Q6IB11     | PGRMC1 prot36.4102564  | 7 | 7 | 6 | 21.7  | 4.7   | 108 | 7 |
| P23193     | Transcripti 19.269103  | 4 | 5 | 4 | 33.9  | 8.38  | 110 | 4 |
| Q9BPX3     | Condensin 6.40394089   | 4 | 4 | 4 | 114.3 | 5.59  | 154 | 4 |
| G5EA30     | CUG triplet10.7003891  | 6 | 6 | 6 | 55.1  | 8.38  | 102 | 6 |
| Q96EK6     | Glucosamine 35.326087  | 3 | 4 | 3 | 20.7  | 7.99  | 101 | 3 |
| 075348     | V-type prot33.0508475  | 4 | 4 | 4 | 13.7  | 8.79  | 118 | 4 |
| Q15056     | Eukaryotic 26.2096774  | 6 | 8 | 6 | 27.4  | 7.23  | 68  | 6 |
| P07305     | Histone H1.23.1958763  | 4 | 6 | 4 | 20.9  | 10.84 | 153 | 4 |
| X5D8S6     | Adenylosucc17.5619835  | 7 | 7 | 7 | 54.9  | 7.11  | 91  | 7 |
| Q96K17     | Transcripti41.7721519  | 4 | 6 | 4 | 17.3  | 6.35  | 92  | 4 |
| P10155     | 60 kDa SS-18.0297398   | 8 | 8 | 8 | 60.6  | 8.03  | 71  | 8 |
| D3DTH7     | Myosin IC, 10.9048724  | 7 | 7 | 1 | 98.9  | 9.42  | 75  | 7 |
| P48960     | CD97 antige8.26347305  | 5 | 6 | 5 | 91.8  | 6.87  | 82  | 5 |
| Q562Z4     | Actin-like 46.6019417  | 2 | 8 | 1 | 11.5  | 7.58  | 145 | 2 |
| Q12907     | Vesicular i28.0898876  | 7 | 8 | 7 | 40.2  | 6.95  | 112 | 7 |
| Q16513     | Serine/thre9.55284553  | 5 | 5 | 5 | 112   | 6.3   | 96  | 5 |
| Q8TCS8     | Polyribonuc6.89655172  | 5 | 6 | 5 | 85.9  | 7.77  | 90  | 5 |
| Q9NZZ3     | Charged mul43.3789954  | 5 | 9 | 5 | 24.6  | 4.83  | 78  | 5 |
| P52294     | Importin st7.80669145  | 4 | 5 | 1 | 60.2  | 5.01  | 121 | 4 |
| Q6IRT1     | S-(hydroxyn17.9144385  | 7 | 7 | 7 | 39.7  | 7.49  | 38  | 7 |
| Q4VXU2     | Polyadenyl11.4006515   | 6 | 8 | 1 | 68.3  | 8.87  | 171 | 6 |
| P13804     | Electron ti25.5255255  | 6 | 7 | 6 | 35.1  | 8.38  | 98  | 6 |
| PODN79     | Cystathionil1.9782214  | 6 | 7 | 6 | 60.5  | 6.65  | 115 | 6 |
| E5KND5     | Elongation 7.45672437  | 5 | 5 | 5 | 83.4  | 7.01  | 114 | 5 |
| P36542     | ATP synthas19.1275168  | 5 | 5 | 5 | 33    | 9.22  | 127 | 5 |
| P36957     | Dihydrolipic8.60927152 | 3 | 3 | 3 | 48.7  | 8.95  | 129 | 3 |
| Q9ULW0     | Targeting i8.70147256  | 5 | 5 | 5 | 85.6  | 9.23  | 132 | 5 |
| 015347     | High mobili 24.5       | 5 | 6 | 5 | 23    | 8.37  | 58  | 5 |
| Q8IX12     | Cell divisi9.56521739  | 7 | 8 | 7 | 132.7 | 5.76  | 69  | 7 |
| Q6FI81     | Anamorsin (12.1794872  | 3 | 4 | 3 | 33.6  | 5.62  | 99  | 3 |
| Q13243     | Serine/argi19.8529412  | 6 | 7 | 5 | 31.2  | 11.59 | 137 | 6 |
| Q9H6Z4     | Ran-binding7.23104036  | 3 | 4 | 3 | 60.2  | 4.78  | 102 | 3 |
| P09669     | Cytochrome 50.6666667  | 5 | 6 | 5 | 8.8   | 10.39 | 86  | 5 |
| Q9NU22     | Midasin OS-1.80486061  | 6 | 6 | 6 | 632.4 | 5.68  | 70  | 6 |
| B3KXW5     | cDNA FLJ4615.68047337  | 4 | 4 | 4 | 94.1  | 7.05  | 120 | 4 |
| P43034     | Platelet-ac13.6585366  | 4 | 4 | 4 | 46.6  | 7.37  | 71  | 4 |
| 000159     | Unconventic8.84289746  | 7 | 7 | 1 | 121.6 | 9.41  | 75  | 7 |
| Q05519     | Serine/argi10.7438017  | 3 | 4 | 3 | 53.5  | 10.52 | 62  | 3 |
| AOA087X0W7 | Acyl-coenz9.97624703   | 3 | 5 | 3 | 46.3  | 7.02  | 107 | 3 |

|            |                         |   |    |   |       |       |     |   |
|------------|-------------------------|---|----|---|-------|-------|-----|---|
| Q9NY93     | Probable A19.32358318   | 4 | 5  | 4 | 61.6  | 9.26  | 108 | 4 |
| O00629     | Importin st24.7600768   | 7 | 7  | 5 | 57.9  | 4.96  | 85  | 7 |
| Q5TDC3     | WD repeat c12.7253446   | 7 | 7  | 7 | 106   | 6.64  | 54  | 7 |
| P62854     | 40S riboson44.3478261   | 4 | 8  | 4 | 13    | 11    | 102 | 4 |
| Q14008     | Cytoskeletonc3.54330709 | 5 | 5  | 5 | 225.4 | 7.8   | 93  | 5 |
| V9HWC9     | Superoxide 23.3766234   | 1 | 2  | 1 | 15.9  | 6.13  | 39  | 1 |
| Q8N183     | Mimitin, mi23.6686391   | 2 | 3  | 2 | 19.8  | 8.97  | 63  | 2 |
| B2R7T6     | cDNA, FLJ9f13.7777778   | 4 | 4  | 4 | 49.9  | 9.06  | 165 | 4 |
| P06703     | Protein S1c35.5555556   | 5 | 7  | 5 | 10.2  | 5.48  | 130 | 5 |
| Q59EL2     | COP9 consti10.6430155   | 4 | 5  | 4 | 52.5  | 5.54  | 52  | 4 |
| Q9UNF1     | Melanoma-as 9.9009901   | 5 | 6  | 5 | 64.9  | 9.32  | 106 | 5 |
| B2RBS8     | cDNA, FLJ9f 7.8817734   | 4 | 6  | 4 | 69.3  | 6.28  | 103 | 4 |
| Q9UBW8     | COP9 signal31.6363636   | 5 | 5  | 5 | 30.3  | 8.22  | 82  | 5 |
| Q9H6R4     | Nucleolar r 7.504363    | 5 | 7  | 5 | 127.5 | 7.64  | 72  | 5 |
| B2R6A3     | Na(+)/H(+) 17.5977654   | 4 | 4  | 4 | 38.9  | 5.77  | 111 | 4 |
| E9PR17     | CD59 glycof25.3846154   | 4 | 7  | 4 | 14.5  | 7.77  | 75  | 4 |
| AOA1BOGW77 | Alpha-aminic12.6353791  | 5 | 5  | 5 | 60    | 8.18  | 82  | 5 |
| MOR2B7     | DNA polyme7.23742277    | 6 | 6  | 6 | 126.3 | 7.21  | 75  | 6 |
| Q5QJE6     | Deoxynuclec9.65608466   | 5 | 6  | 5 | 84.4  | 6.16  | 121 | 5 |
| AOA0J9YXF2 | Paraoxonasc 10.4        | 3 | 6  | 3 | 41.5  | 5.72  | 67  | 3 |
| Q9H444     | Charged mu127.2321429   | 5 | 5  | 5 | 24.9  | 4.82  | 79  | 5 |
| AOA087WUC6 | Signal pept127.3127753  | 6 | 7  | 6 | 25.1  | 8.47  | 126 | 6 |
| Q9UNF0     | Protein kir13.7860082   | 5 | 6  | 5 | 55.7  | 5.2   | 104 | 5 |
| Q14257     | Reticulocal 7.2555205   | 1 | 3  | 1 | 36.9  | 4.4   | 154 | 1 |
| O95218     | Zinc finger 13.030303   | 4 | 5  | 4 | 37.4  | 10.01 | 176 | 4 |
| E7EX44     | Caldesmon (16.8761221   | 7 | 7  | 1 | 64.1  | 7.02  | 111 | 7 |
| AOA024R9I0 | V-type prot10.7329843   | 3 | 4  | 3 | 43.9  | 7.46  | 87  | 3 |
| AOA140VKE9 | Testis tiss11.4420063   | 5 | 6  | 5 | 71.4  | 5.2   | 75  | 5 |
| B2R627     | cDNA, FLJ9f5.81506196   | 5 | 5  | 5 | 114.4 | 5.82  | 102 | 5 |
| P04899     | Guanine nuc18.8732394   | 4 | 5  | 3 | 40.4  | 5.54  | 133 | 4 |
| O60568     | Procollager6.91056911   | 4 | 6  | 4 | 84.7  | 6.05  | 137 | 4 |
| B5BU61     | Histone de10.1659751    | 5 | 5  | 1 | 55    | 5.48  | 104 | 5 |
| P14384     | Carboxypept10.6094808   | 4 | 5  | 4 | 50.5  | 7.36  | 79  | 4 |
| O14949     | Cytochrome 39.0243902   | 4 | 6  | 4 | 9.9   | 10.08 | 107 | 4 |
| Q9NR45     | Sialic acic12.2562674   | 3 | 4  | 3 | 40.3  | 6.74  | 94  | 3 |
| A8K761     | NADH dehyd35.4651163    | 6 | 6  | 6 | 20.8  | 8.48  | 55  | 6 |
| Q9Y639     | Neuroplast10.0502513    | 3 | 5  | 3 | 44.4  | 7.99  | 67  | 3 |
| K7ELC2     | 40S riboson20.3947368   | 2 | 5  | 2 | 17.7  | 10.39 | 126 | 2 |
| U3KQ56     | Glyoxylate 10.8938547   | 2 | 2  | 2 | 38.7  | 8.02  | 91  | 2 |
| P15328     | Folate reccl4.7859922   | 2 | 4  | 2 | 29.8  | 7.97  | 56  | 2 |
| AOA024R625 | Serine/thre16.9381107   | 4 | 6  | 2 | 35.1  | 5.06  | 36  | 4 |
| Q9BR76     | Coronin-1B 12.8834356   | 4 | 4  | 4 | 54.2  | 5.88  | 120 | 4 |
| BOQZ18     | Copine-1 O8.85608856    | 4 | 4  | 4 | 59.7  | 6.04  | 119 | 4 |
| AOA0B4J1V8 | HCG2039996 8.69017632   | 3 | 4  | 3 | 87.9  | 9.51  | 60  | 3 |
| A6NFX8     | ADP-sugar r15.5172414   | 4 | 4  | 4 | 25.9  | 5.19  | 127 | 4 |
| POCOS5     | Histone H2f 23.4375     | 3 | 10 | 1 | 13.5  | 10.58 | 187 | 3 |
| A8K6D2     | cDNA FLJ76f27.0491803   | 5 | 6  | 5 | 26.7  | 9.17  | 106 | 5 |
| AOA140VJF4 | Biliverdin 17.5675676   | 5 | 6  | 5 | 33.4  | 6.44  | 94  | 5 |
| B3KML1     | cDNA FLJ11f11.9460501   | 5 | 5  | 5 | 58.4  | 5.06  | 68  | 5 |
| Q13451     | Peptidyl-p16.4113786    | 6 | 6  | 6 | 51.2  | 5.9   | 101 | 6 |
| Q8TDD1     | ATP-depende8.85357548   | 5 | 5  | 5 | 98.5  | 10.02 | 91  | 5 |
| AOA024QYX0 | Emopamil bi16.5217391   | 3 | 5  | 3 | 26.3  | 7.9   | 104 | 3 |
| O00461     | Golgi inte8.18965517    | 4 | 4  | 4 | 81.8  | 4.77  | 89  | 4 |
| Q9Y277     | Voltage-dep15.9010601   | 4 | 4  | 3 | 30.6  | 8.66  | 98  | 4 |
| Q08170     | Serine/argj 12.145749   | 6 | 8  | 1 | 56.6  | 11.52 | 117 | 6 |
| Q09161     | Nuclear cap8.10126582   | 4 | 4  | 4 | 91.8  | 6.43  | 68  | 4 |
| Q6FGZ3     | EPHX1 prote18.9010989   | 5 | 6  | 5 | 52.9  | 7.25  | 71  | 5 |
| AOA0G2JH68 | Protein di6.76100629    | 6 | 6  | 6 | 141.3 | 5.39  | 48  | 6 |
| B4DRM3     | cDNA FLJ54f15.2597403   | 8 | 8  | 8 | 69.7  | 5.67  | 76  | 8 |
| AOA087X117 | Nodal modul5.60378848   | 6 | 6  | 6 | 139.4 | 5.85  | 113 | 6 |
| V9HWA6     | Epididymis 34.5454545   | 5 | 5  | 4 | 18.5  | 7.85  | 115 | 5 |
| AOA140VKA0 | Caldesmon 118.0297398   | 7 | 7  | 1 | 62.6  | 6.37  | 97  | 7 |
| B2RAL9     | Dual specil16.1458333   | 4 | 5  | 4 | 41.8  | 6.33  | 87  | 4 |
| Q8WUM0     | Nuclear por8.30449827   | 6 | 6  | 6 | 128.9 | 5.1   | 42  | 6 |
| Q16222     | UDP-N-acety11.302682    | 4 | 4  | 4 | 58.7  | 6.33  | 87  | 4 |
| Q59GX2     | Solute cari6.76982592   | 3 | 4  | 3 | 57    | 9.47  | 86  | 3 |
| AOA024R3J1 | Tripartite 10.3741497   | 4 | 5  | 4 | 65.8  | 7.15  | 73  | 4 |
| AOA024R5F7 | 7-dehydrocl9.26315789   | 3 | 4  | 3 | 54.5  | 8.7   | 89  | 3 |
| Q9H2U1     | ATP-depende8.33333333   | 5 | 5  | 5 | 114.7 | 7.68  | 73  | 5 |
| AOA024R5J5 | H. sapiens 132.6923077  | 6 | 7  | 5 | 23.6  | 5.54  | 146 | 6 |
| Q15437     | Protein tr6.64928292    | 5 | 5  | 3 | 86.4  | 6.89  | 118 | 5 |
| P35249     | Replicatio21.2121212    | 6 | 7  | 6 | 39.7  | 8.02  | 71  | 6 |
| Q32P28     | Prolyl 3-hy8.42391304   | 5 | 5  | 5 | 83.3  | 5.14  | 102 | 5 |

|            |             |             |   |    |   |       |       |     |   |
|------------|-------------|-------------|---|----|---|-------|-------|-----|---|
| AOA0D9SGE8 | PHD finger  | 20.4918033  | 5 | 5  | 5 | 41.3  | 8.68  | 76  | 5 |
| O94905     | Erlin-2 OS- | 12.6843658  | 4 | 4  | 4 | 37.8  | 5.62  | 130 | 4 |
| O43813     | LanC-like p | 9.02255639  | 3 | 4  | 3 | 45.3  | 7.75  | 84  | 3 |
| Q15907     | Ras-related | 29.3577982  | 5 | 6  | 5 | 24.5  | 5.94  | 123 | 5 |
| B3KM21     | Family with | 22.0338983  | 2 | 3  | 2 | 13.3  | 8.76  | 128 | 2 |
| P18077     | 60S ribosom | 36.3636364  | 7 | 9  | 7 | 12.5  | 11.06 | 98  | 7 |
| Q9H3N1     | Thioredoxin | 19.2857143  | 5 | 6  | 5 | 31.8  | 4.98  | 133 | 5 |
| C9JA08     | 60S ribosom | 9.45179584  | 4 | 5  | 4 | 60.1  | 6.62  | 84  | 4 |
| P18583     | Protein S0  | 3.00906843  | 5 | 5  | 5 | 263.7 | 5.64  | 98  | 5 |
| Q6LES2     | Annexin (F  | 19.6261682  | 4 | 5  | 4 | 36.1  | 6.13  | 113 | 4 |
| A8KAE0     | cDNA FLJ78  | 7.1744907   | 5 | 5  | 5 | 125.9 | 5.62  | 89  | 5 |
| B7Z4M1     | Reticulon C | 43.902439   | 2 | 3  | 1 | 12.7  | 7.83  | 100 | 2 |
| Q8WV80     | MTAP protei | 31.8181818  | 4 | 4  | 4 | 17    | 7.68  | 91  | 4 |
| Q6PJJ2     | RRP1 protei | 19.0987124  | 6 | 7  | 6 | 53.4  | 9.48  | 113 | 6 |
| Q9Y305     | Acyl-coenz  | 15.4897494  | 5 | 5  | 5 | 49.9  | 8.6   | 104 | 5 |
| P05387     | 60S acidic  | 60          | 4 | 5  | 4 | 11.7  | 4.54  | 59  | 4 |
| P26368     | Splicing fa | 16.6315789  | 4 | 5  | 4 | 53.5  | 9.09  | 83  | 4 |
| Q5T9B7     | Adenylate l | 27.6190476  | 5 | 5  | 5 | 23.4  | 8.6   | 54  | 5 |
| AOA087WUB9 | Beta-cateni | 10.915493   | 5 | 6  | 5 | 65.7  | 5.02  | 102 | 5 |
| B7Z4C8     | 60S ribosom | 43.0769231  | 7 | 10 | 7 | 15.1  | 10.37 | 143 | 7 |
| P21796     | Voltage-dep | 20.4946996  | 5 | 6  | 4 | 30.8  | 8.54  | 119 | 5 |
| MOQXB4     | Coatomer p  | 16.3141994  | 3 | 4  | 3 | 36.9  | 5.16  | 81  | 3 |
| Q9UBU9     | Nuclear RN  | 11.1470113  | 4 | 5  | 4 | 70.1  | 8.51  | 51  | 4 |
| Q96CN7     | Isochorism  | 13.4228188  | 3 | 3  | 3 | 32.2  | 7.39  | 112 | 3 |
| Q9BYG3     | MKI67 FHA   | c29.0102389 | 5 | 6  | 5 | 34.2  | 9.88  | 72  | 5 |
| P30876     | DNA-direct  | 8.77342419  | 6 | 6  | 6 | 133.8 | 6.87  | 55  | 6 |
| O60716     | Catenin de  | 18.88429752 | 6 | 7  | 6 | 108.1 | 6.23  | 94  | 6 |
| V9GYM8     | Rho guanin  | 5.81959263  | 4 | 4  | 4 | 116   | 7.37  | 79  | 4 |
| BOUZZ8     | Chromosome  | 11.9672131  | 4 | 4  | 4 | 68    | 9.67  | 107 | 4 |
| O00273     | DNA fragme  | 16.6163142  | 4 | 4  | 4 | 36.5  | 4.79  | 92  | 4 |
| O75400     | Pre-mRNA-p  | 7.62800418  | 5 | 6  | 5 | 108.7 | 7.56  | 62  | 5 |
| AOA087X2G6 | Nucleolar p | 21.0970464  | 4 | 4  | 4 | 27.4  | 10.2  | 75  | 4 |
| P41223     | Protein BUI | 28.4722222  | 4 | 5  | 4 | 17    | 8.82  | 60  | 4 |
| P30622     | CAP-Gly don | 3.96383866  | 5 | 5  | 5 | 162.1 | 5.36  | 76  | 5 |
| Q6DN03     | Putative hi | 13.9896373  | 4 | 15 | 4 | 21.5  | 10.7  | 154 | 4 |
| Q92896     | Golgi appar | 6.4461408   | 4 | 6  | 4 | 134.5 | 6.9   | 79  | 4 |
| AOA0A0MTC1 | E3 ubiquiti | l1.31278539 | 6 | 6  | 6 | 596.1 | 6.42  | 81  | 6 |
| Q13907     | Isopentenyl | 30.3964758  | 5 | 6  | 5 | 26.3  | 6.34  | 98  | 5 |
| Q9H3K6     | BolA-like p | 61.627907   | 4 | 4  | 4 | 10.1  | 6.52  | 94  | 4 |
| B2R6E2     | cDNA, FLJ9  | 15.9914712  | 5 | 6  | 5 | 51.6  | 5.25  | 43  | 5 |
| Q7Z2Z2     | Elongation  | 5.89285714  | 5 | 5  | 5 | 125.4 | 5.91  | 98  | 5 |
| Q9H9B4     | Sideroflexi | 21.7391304  | 6 | 7  | 5 | 35.6  | 9.07  | 70  | 6 |
| P27338     | Amine oxid  | 12.6923077  | 4 | 4  | 4 | 58.7  | 7.5   | 88  | 4 |
| O15427     | Monocarbox  | 13.7634409  | 5 | 6  | 5 | 49.4  | 7.96  | 98  | 5 |
| Q15738     | Sterol-4-al | 9.38337802  | 3 | 4  | 3 | 41.9  | 8.06  | 121 | 3 |
| Q96I24     | Far upstre  | 14.8601399  | 6 | 6  | 4 | 61.6  | 8.38  | 110 | 6 |
| Q9BZJ0     | Crooked nec | 5.66037736  | 4 | 4  | 4 | 100.4 | 8     | 89  | 4 |
| B4DNB9     | cDNA FLJ53  | (16.7391304 | 7 | 7  | 7 | 52.3  | 9.5   | 132 | 7 |
| P35658     | Nuclear por | 2.67942584  | 4 | 4  | 4 | 213.5 | 7.47  | 108 | 4 |
| AOA087WZE9 | High mobil  | l11.5384615 | 1 | 3  | 1 | 13.9  | 9.91  | 45  | 1 |
| Q8WWM7     | Ataxin-2-li | 8.65116279  | 5 | 6  | 5 | 113.3 | 8.59  | 38  | 5 |
| P14735     | Insulin-de  | 7.26202159  | 6 | 6  | 6 | 117.9 | 6.61  | 86  | 6 |
| P25788     | Proteasome  | 23.5294118  | 5 | 5  | 5 | 28.4  | 5.33  | 112 | 5 |
| P56134     | ATP syntha  | 42.5531915  | 4 | 6  | 2 | 10.9  | 9.67  | 88  | 4 |
| Q96JB5     | CDK5 regul  | 8.69565217  | 4 | 6  | 4 | 56.9  | 4.75  | 122 | 4 |
| P35270     | Sepiapterir | 22.9885057  | 4 | 4  | 4 | 28    | 8.05  | 91  | 4 |
| H3BLV9     | SRSF protei | 8.19672131  | 5 | 5  | 5 | 76    | 6.28  | 119 | 5 |
| E5KS95     | Elongation  | 20.3076923  | 4 | 4  | 4 | 35.4  | 8.38  | 59  | 4 |
| AOA024R6S1 | DnaJ (Hsp4  | (16.5048544 | 5 | 10 | 5 | 45.7  | 6.48  | 69  | 5 |
| P62745     | Rho-related | 14.7959184  | 2 | 4  | 1 | 22.1  | 5.24  | 80  | 2 |
| P09382     | Galectin-1  | 31.8518519  | 3 | 5  | 3 | 14.7  | 5.5   | 58  | 3 |
| P05114     | Non-histone | 27          | 2 | 3  | 2 | 10.7  | 9.6   | 90  | 2 |
| O43324     | Eukaryotic  | 20.6896552  | 3 | 4  | 3 | 19.8  | 8.54  | 180 | 3 |
| Q6U8A4     | Ubiquitin-  | 4.31654676  | 3 | 3  | 3 | 128.9 | 5.78  | 91  | 3 |
| Q969X6     | U3 small nt | 5.83090379  | 3 | 3  | 3 | 76.8  | 8.85  | 128 | 3 |
| B2R5S3     | cDNA, FLJ9  | 6.56455142  | 2 | 3  | 2 | 50.2  | 8.31  | 94  | 2 |
| Q9NYF8     | Bcl-2-assoc | 7.93478261  | 6 | 7  | 6 | 106.1 | 9.98  | 99  | 6 |
| Q00653     | Nuclear fac | 5.66666667  | 4 | 4  | 4 | 96.7  | 6.25  | 73  | 4 |
| P34896     | Serine hyd  | 13.0434783  | 5 | 5  | 4 | 53    | 7.71  | 109 | 5 |
| P99999     | Cytochrome  | 24.7619048  | 3 | 4  | 3 | 11.7  | 9.57  | 131 | 3 |
| Q9H0D6     | 5'-3' exori | 6.84210526  | 4 | 4  | 4 | 108.5 | 7.47  | 101 | 4 |
| Q92922     | SWI/SNF con | 4.70588235  | 4 | 5  | 3 | 122.8 | 5.76  | 79  | 4 |
| E9PR30     | 40S ribosom | 12.244898   | 3 | 5  | 3 | 10.9  | 11.56 | 111 | 3 |

|            |                        |   |   |   |       |       |     |   |
|------------|------------------------|---|---|---|-------|-------|-----|---|
| A8K2T7     | Receptor p17.27272727  | 5 | 5 | 5 | 134.1 | 6.7   | 87  | 5 |
| Q7L0Y3     | Mitochondri14.8883375  | 4 | 4 | 4 | 47.3  | 9.36  | 32  | 4 |
| P62314     | Small nucle27.7310924  | 2 | 2 | 2 | 13.3  | 11.56 | 68  | 2 |
| Q2MIJ6     | Oxidase (C) 6.0483871  | 3 | 4 | 3 | 55.3  | 9.69  | 87  | 3 |
| A5YKK6     | CCR4-NOT tr2.02020202  | 4 | 4 | 4 | 266.8 | 7.11  | 139 | 4 |
| AOA024R0R4 | SUMO-1 acti18.4971098  | 4 | 4 | 4 | 38.4  | 5.3   | 89  | 4 |
| Q07812     | Apoptosis r 23.4375    | 3 | 3 | 3 | 21.2  | 5.22  | 116 | 3 |
| P30043     | Flavin red20.8737864   | 3 | 5 | 3 | 22.1  | 7.65  | 65  | 3 |
| P50570     | Dynamin-2 (8.27586207  | 5 | 5 | 5 | 98    | 7.44  | 90  | 5 |
| P50213     | Isocitrate 15.3005464  | 4 | 4 | 4 | 39.6  | 6.92  | 64  | 4 |
| P28838     | Cytosol ami10.4046243  | 4 | 5 | 4 | 56.1  | 7.93  | 80  | 4 |
| AOA140VJX1 | Testicular 13.5831382  | 4 | 4 | 4 | 45.2  | 8.85  | 106 | 4 |
| Q5VV89     | Microsomal 23.4939759  | 3 | 4 | 3 | 18.4  | 9.96  | 41  | 3 |
| B3KN49     | cDNA FLJ1321.7270195   | 4 | 4 | 4 | 40.6  | 4.89  | 82  | 4 |
| Q96HY6     | DDR GK domai14.6496815 | 3 | 3 | 3 | 35.6  | 5.12  | 112 | 3 |
| Q96GG9     | DCN1-like f11.1969112  | 2 | 2 | 2 | 30.1  | 5.34  | 117 | 2 |
| Q5TIJ5     | Putative cc27.1523179  | 2 | 2 | 2 | 15.5  | 9.89  | 69  | 2 |
| P63151     | Serine/thre13.1991051  | 4 | 4 | 4 | 51.7  | 6.2   | 58  | 4 |
| Q96IR7     | 4-hydroxypl19.6765499  | 4 | 5 | 4 | 39.4  | 7.03  | 48  | 4 |
| Q9UBQ5     | Eukaryotic 21.1009174  | 4 | 6 | 4 | 25    | 4.93  | 89  | 4 |
| Q8NEJ9     | Neuroguidir10.1587302  | 2 | 2 | 2 | 35.9  | 9.57  | 99  | 2 |
| AOA0S2Z5H3 | Clathrin ir11.6640747  | 5 | 5 | 5 | 70.3  | 6.58  | 83  | 5 |
| MOQXF9     | Branched-cl6.74157303  | 2 | 2 | 2 | 49.9  | 7.46  | 131 | 2 |
| P35251     | Replicatio4.00696864   | 3 | 3 | 3 | 128.2 | 9.36  | 103 | 3 |
| Q96CS3     | FAS-associ2.3595506    | 3 | 4 | 3 | 52.6  | 5.62  | 63  | 3 |
| E9PMS6     | LIM domain 5.7254902   | 5 | 5 | 5 | 145.3 | 7.3   | 40  | 5 |
| P56199     | Integrin a13.98642918  | 5 | 5 | 5 | 130.8 | 6.29  | 111 | 5 |
| P09132     | Signal rec28.47222222  | 3 | 3 | 3 | 16.1  | 9.85  | 103 | 3 |
| Q06124     | Tyrosine-p11.3902848   | 5 | 5 | 5 | 68.4  | 7.3   | 69  | 5 |
| Q8WUV3     | PRMT3 prote6.56934307  | 3 | 5 | 3 | 61.9  | 7.42  | 91  | 3 |
| P11177     | Pyruvate d11.9777159   | 3 | 4 | 3 | 39.2  | 6.65  | 86  | 3 |
| Q9HA77     | Probable cy 5.4964539  | 2 | 3 | 2 | 62.2  | 8.34  | 91  | 2 |
| AOA024RAD5 | Dolichyl-di9.21052632  | 4 | 6 | 4 | 50.7  | 6.4   | 116 | 4 |
| Q15182     | Small nucle17.8947368  | 5 | 5 | 5 | 29.7  | 10.07 | 137 | 5 |
| P35610     | Sterol O-ac7.09090909  | 2 | 3 | 2 | 64.7  | 8.94  | 0   | 2 |
| F8W031     | Uncharacter15.9695817  | 3 | 4 | 3 | 29.2  | 7.01  | 120 | 3 |
| Q95292     | Vesicle-as25.5144033   | 5 | 5 | 4 | 27.2  | 7.3   | 55  | 5 |
| P51398     | 28S riboson9.54773869  | 3 | 3 | 3 | 45.5  | 8.88  | 84  | 3 |
| Q9BTC8     | Metastasis-6.56565657  | 3 | 3 | 3 | 67.5  | 8.57  | 84  | 3 |
| 075521     | Enoyl-CoA c11.1675127  | 2 | 2 | 2 | 43.6  | 9     | 73  | 2 |
| AOA024RE04 | Uncharacter6.18101545  | 2 | 3 | 2 | 52.1  | 8.47  | 76  | 2 |
| Q16762     | Thiosulfate10.7744108  | 3 | 3 | 3 | 33.4  | 7.25  | 70  | 3 |
| Q9Y3C6     | Peptidyl-pr20.4819277  | 2 | 3 | 2 | 18.2  | 7.99  | 48  | 2 |
| B2R802     | cDNA, FLJ920.212766    | 3 | 4 | 2 | 31.3  | 9.86  | 42  | 3 |
| AOA0X1KG71 | Negative e18.28025478  | 4 | 6 | 4 | 70    | 6.04  | 111 | 4 |
| Q15637     | Splicing f212.8325509  | 6 | 6 | 6 | 68.3  | 8.98  | 65  | 6 |
| Q14739     | Lamin-B rec6.01626016  | 3 | 3 | 3 | 70.7  | 9.36  | 129 | 3 |
| Q96HC4     | PDZ and LIM12.9194631  | 7 | 7 | 7 | 63.9  | 8.21  | 100 | 7 |
| AOA0G2JK23 | Large proli4.50530035  | 4 | 4 | 4 | 119.3 | 5.6   | 105 | 4 |
| Q59H06     | Transporter10.3693182  | 5 | 5 | 5 | 77.7  | 7.85  | 76  | 5 |
| B2RAW0     | cDNA, FLJ927.53246753  | 4 | 4 | 4 | 82.4  | 5.53  | 85  | 4 |
| B4E0Y9     | Serine/thre7.30593607  | 2 | 2 | 2 | 49.2  | 5.68  | 92  | 2 |
| Q14651     | Plastin-1 (5.88235294  | 3 | 4 | 2 | 70.2  | 5.41  | 163 | 3 |
| Q9UNL2     | Translocon-15.1351351  | 3 | 4 | 3 | 21.1  | 9.61  | 120 | 3 |
| Q86X55     | Histone-arg 6.25       | 3 | 4 | 3 | 65.8  | 6.73  | 90  | 3 |
| P08243     | Asparagine 9.80392157  | 5 | 5 | 5 | 64.3  | 6.86  | 83  | 5 |
| Q14558     | Phosphorib14.8876404   | 4 | 5 | 3 | 39.4  | 7.2   | 93  | 4 |
| Q9P035     | Very-long-c13.8121547  | 3 | 4 | 3 | 43.1  | 8.94  | 50  | 3 |
| A1L0T0     | Acetolactat12.3417722  | 4 | 4 | 4 | 67.8  | 8.15  | 20  | 4 |
| P29083     | General tr210.4783599  | 3 | 3 | 3 | 49.4  | 4.82  | 93  | 3 |
| 060502     | Protein O-(6.65938865  | 6 | 6 | 6 | 102.8 | 4.91  | 77  | 6 |
| Q6P1J9     | Parafibromi12.0527307  | 6 | 6 | 6 | 60.5  | 9.61  | 109 | 6 |
| P16949     | Stathmin O24.8322148   | 3 | 4 | 3 | 17.3  | 5.97  | 118 | 3 |
| Q8TDB8     | Solute carri7.69230769 | 3 | 3 | 3 | 56.3  | 7.83  | 61  | 3 |
| P15529     | Membrane cc6.37755102  | 2 | 4 | 2 | 43.7  | 6.74  | 91  | 2 |
| AOA087WWF6 | DNA polymer7.73809524  | 3 | 3 | 3 | 54.7  | 5.95  | 94  | 3 |
| P57088     | Transmembr214.1700405  | 3 | 4 | 3 | 28    | 9.7   | 104 | 3 |
| Q9Y6K5     | 2'-5'-olig5.33578657   | 5 | 7 | 5 | 121.1 | 8.4   | 78  | 5 |
| B3KS98     | Eukaryotic 13.3879781  | 3 | 4 | 3 | 41.6  | 7.33  | 96  | 3 |
| E5KS60     | Succinate--11.0151188  | 4 | 4 | 4 | 50.3  | 7.42  | 88  | 4 |
| Q96CP2     | FLYWCH fami47.1428571  | 4 | 5 | 4 | 14.6  | 8.46  | 46  | 4 |
| 060783     | 28S riboson 21.875     | 2 | 3 | 2 | 15.1  | 11.41 | 114 | 2 |
| F1T0A5     | PRP31 pre-n11.4228457  | 5 | 5 | 5 | 55.4  | 5.78  | 76  | 5 |

|            |             |             |   |   |   |       |       |     |   |
|------------|-------------|-------------|---|---|---|-------|-------|-----|---|
| AOA087WWE2 | DNA-direct  | 3.03030303  | 5 | 5 | 5 | 218.1 | 7.85  | 91  | 5 |
| E9PF49     | NADH dehyd  | 19.0045249  | 3 | 5 | 3 | 26.6  | 8.87  | 112 | 3 |
| AOA024R3W7 | Eukaryotic  | 23.5555556  | 4 | 5 | 4 | 24.7  | 4.67  | 112 | 4 |
| Q10570     | Cleavage ar | 2.28690229  | 2 | 3 | 2 | 160.8 | 6.4   | 84  | 2 |
| Q14203     | Dynactin st | 4.30359937  | 5 | 5 | 5 | 141.6 | 5.81  | 110 | 5 |
| X6RAL5     | Histone de  | 24.4186047  | 4 | 4 | 4 | 19.5  | 9.8   | 105 | 4 |
| Q9BTV4     | Transmembr  | 14.75       | 4 | 5 | 4 | 44.8  | 8.13  | 43  | 4 |
| P23258     | Tubulin gan | 9.31263858  | 3 | 3 | 3 | 51.1  | 6.14  | 98  | 3 |
| Q92541     | RNA polymer | 5.63380282  | 4 | 4 | 4 | 80.3  | 8.15  | 79  | 4 |
| O75607     | Nucleoplas  | 17.4157303  | 2 | 4 | 2 | 19.3  | 4.63  | 107 | 2 |
| C9IZQ1     | Translocan  | 11.409396   | 3 | 4 | 3 | 33.9  | 4.69  | 140 | 3 |
| X5DNM4     | Lactoylglu  | 22.2826087  | 4 | 5 | 4 | 20.8  | 5.31  | 82  | 4 |
| Q96A33     | Coiled-coil | 12.0082816  | 4 | 4 | 4 | 55.8  | 4.87  | 60  | 4 |
| E7ERK9     | Translatio  | 9.92647059  | 3 | 3 | 3 | 59.7  | 9.42  | 93  | 3 |
| O43660     | Pleiotropic | 12.4513619  | 4 | 4 | 4 | 57.2  | 9.17  | 69  | 4 |
| Q9NTJ5     | Phosphatid  | 9.88074957  | 5 | 5 | 5 | 66.9  | 7.12  | 77  | 5 |
| Q15833     | Syntaxin-bi | 11.8043845  | 4 | 4 | 4 | 66.4  | 6.55  | 38  | 4 |
| Q12888     | Tumor suppl | 4.36105477  | 4 | 4 | 4 | 213.4 | 4.7   | 34  | 4 |
| A8K9U0     | cDNA FLJ78  | 12.0879121  | 2 | 2 | 2 | 40.3  | 7.08  | 82  | 2 |
| Q14014     | PR310 c-K   | 125.3333333 | 3 | 3 | 2 | 16.9  | 5.21  | 119 | 3 |
| Q9H9T3     | Elongator c | 11.3345521  | 5 | 5 | 5 | 62.2  | 8.88  | 86  | 5 |
| Q6AI02     | Putative ur | 6.09260764  | 4 | 4 | 4 | 140.9 | 5.5   | 27  | 4 |
| P49207     | 60S riboso  | 37.6068376  | 6 | 6 | 6 | 13.3  | 11.47 | 119 | 6 |
| P41743     | Protein kir | 5.03355705  | 2 | 2 | 2 | 68.2  | 5.85  | 139 | 2 |
| Q9NX55     | Huntingtin  | 28.6821705  | 2 | 3 | 2 | 14.7  | 4.93  | 62  | 2 |
| O15305     | Phosphoman  | 15.8536585  | 3 | 4 | 3 | 28.1  | 6.77  | 74  | 3 |
| Q9NX20     | 39S riboso  | 19.5219124  | 4 | 5 | 4 | 28.4  | 10.13 | 70  | 4 |
| AOA087WU03 | Heterogene  | 31.5789474  | 1 | 2 | 1 | 6.7   | 4.65  | 114 | 1 |
| Q59EK3     | Adaptor-rel | 12.0171674  | 4 | 4 | 4 | 53.2  | 8.88  | 36  | 4 |
| L7RSM2     | Mitogen-act | 18.3333333  | 4 | 5 | 4 | 41.5  | 5.88  | 41  | 4 |
| Q9BY43     | Charged mul | 18.4684685  | 3 | 3 | 3 | 25.1  | 4.7   | 109 | 3 |
| V9HW12     | Epididymis  | 16.6666667  | 3 | 6 | 2 | 21.9  | 5.97  | 117 | 3 |
| P49959     | Double-str  | 7.48587571  | 5 | 5 | 5 | 80.5  | 5.9   | 98  | 5 |
| E7EW49     | CLIP-associ | 3.36856011  | 3 | 3 | 3 | 165.6 | 8.25  | 98  | 3 |
| Q9BS40     | Latexin OS  | 16.6666667  | 3 | 3 | 3 | 25.7  | 5.78  | 113 | 3 |
| Q7Z3K3     | Pogo trans  | 5.24822695  | 5 | 5 | 5 | 155.2 | 7.4   | 63  | 5 |
| X6R4W8     | BUB3-inter  | 5.23138833  | 2 | 4 | 2 | 52.6  | 8.47  | 55  | 2 |
| O43237     | Cytoplasmic | 10.7723577  | 4 | 4 | 3 | 54.1  | 6.38  | 83  | 4 |
| A8K6X9     | cDNA FLJ76  | 3.49531117  | 3 | 3 | 3 | 133.4 | 6.77  | 96  | 3 |
| B4DJ38     | cDNA FLJ56  | 4.53938585  | 3 | 4 | 1 | 84.1  | 8.57  | 91  | 3 |
| AOA0S2Z5M1 | SEC63-like  | 7.76315789  | 5 | 6 | 5 | 87.9  | 5.31  | 51  | 5 |
| O14737     | Programmed  | 29.6        | 3 | 3 | 3 | 14.3  | 6.04  | 130 | 3 |
| O95816     | BAG family  | 10.4265403  | 3 | 3 | 3 | 23.8  | 6.7   | 118 | 3 |
| Q9BUS0     | ZYX protei  | 10.8433735  | 4 | 4 | 4 | 62.4  | 7.42  | 37  | 4 |
| Q96IX5     | Up-regulat  | 27.5862069  | 2 | 3 | 2 | 6.5   | 9.76  | 84  | 2 |
| Q59EKO     | Epsilon isc | 7.78443114  | 3 | 3 | 2 | 57.9  | 8.24  | 106 | 3 |
| Q9Y3B3     | Transmembr  | 9.82142857  | 2 | 3 | 2 | 25.2  | 6.89  | 73  | 2 |
| AOA087WZN1 | Isocitrate  | 9.56072351  | 3 | 3 | 3 | 42.4  | 8.46  | 93  | 3 |
| O75131     | Copine-3 O  | 13.9664804  | 4 | 4 | 4 | 60.1  | 5.85  | 88  | 4 |
| Q8WU90     | Zinc finger | 10.5633803  | 3 | 4 | 3 | 48.6  | 5.31  | 49  | 3 |
| Q8LZ83     | Aldehyde de | 4.98753117  | 3 | 4 | 3 | 85.1  | 6.79  | 80  | 3 |
| Q9BW60     | Elongation  | 8.96057348  | 2 | 2 | 2 | 32.6  | 9.6   | 122 | 2 |
| Q9Y512     | Sorting anc | 8.95522388  | 3 | 5 | 3 | 51.9  | 6.9   | 91  | 3 |
| Q15061     | WD repeat   | 13.4416544  | 5 | 6 | 5 | 74.8  | 5.57  | 66  | 5 |
| Q9GZZ1     | N-alpha-ac  | 14.2011834  | 3 | 4 | 3 | 19.4  | 8.81  | 81  | 3 |
| P17480     | Nucleolar t | 8.63874346  | 4 | 4 | 4 | 89.4  | 5.81  | 67  | 4 |
| Q13620     | Cullin-4B   | (7.33844469 | 6 | 6 | 1 | 103.9 | 7.37  | 70  | 6 |
| Q8TC07     | TBC1 domai  | 5.78871201  | 3 | 3 | 3 | 79.4  | 5.67  | 119 | 3 |
| Q6NUQ4     | Transmembr  | 7.25689405  | 4 | 4 | 4 | 77.1  | 9.14  | 93  | 4 |
| Q9UK76     | Hematologic | 37.6623377  | 3 | 3 | 3 | 16    | 5.6   | 42  | 3 |
| P08579     | U2 small nt | 24.8888889  | 5 | 5 | 4 | 25.5  | 9.72  | 79  | 5 |
| Q9NXH9     | tRNA (guani | 6.98027314  | 4 | 4 | 4 | 72.2  | 7.64  | 94  | 4 |
| P49711     | Transcripti | 6.74002751  | 2 | 2 | 2 | 82.7  | 6.96  | 103 | 2 |
| Q53EY9     | F-box only  | 11.91067    | 3 | 3 | 3 | 44.5  | 7.03  | 77  | 3 |
| B2R6H7     | cDNA, FLJ9  | 6.8255688   | 4 | 4 | 4 | 104.2 | 5.57  | 78  | 4 |
| E7EMK3     | Flotillin-1 | 13.0434783  | 4 | 4 | 4 | 53.1  | 5.24  | 57  | 4 |
| P82933     | 28S riboso  | 6.56565657  | 2 | 2 | 2 | 45.8  | 9.51  | 111 | 2 |
| B2RBB2     | cDNA, FLJ9  | 12.2522523  | 4 | 4 | 4 | 61.6  | 6.49  | 45  | 4 |
| AOA024R210 | Interferon  | 29.6        | 2 | 2 | 2 | 13.9  | 7.93  | 78  | 2 |
| Q86Y56     | Dynein asse | 7.13450292  | 3 | 3 | 3 | 93.5  | 6.42  | 39  | 3 |
| Q15003     | Condensin c | 8.36707152  | 5 | 5 | 5 | 82.5  | 5.06  | 51  | 5 |
| Q9NQW6     | Anillin OS  | 7.91814947  | 5 | 7 | 5 | 124.1 | 8.07  | 67  | 5 |
| Q9H936     | Mitochondri | 12.0743034  | 4 | 4 | 4 | 34.4  | 9.29  | 116 | 4 |

|            |             |               |   |   |   |       |       |     |   |
|------------|-------------|---------------|---|---|---|-------|-------|-----|---|
| Q86U42     | Polyadenyl: | 8.82352941    | 2 | 2 | 2 | 32.7  | 5.06  | 108 | 2 |
| P30084     | Enoyl-CoA   | 19.65517241   | 2 | 3 | 2 | 31.4  | 8.07  | 56  | 2 |
| Q9NX24     | H/ACA ribor | 24.8366013    | 2 | 3 | 2 | 17.2  | 8.22  | 52  | 2 |
| B3KNC3     | cDNA FLJ14  | 7.61014686    | 5 | 6 | 5 | 84.9  | 5.62  | 56  | 5 |
| AOA0B4J2C3 | Translatior | 7.10659898    | 1 | 2 | 1 | 22.6  | 5.24  | 71  | 1 |
| P61803     | Dolichyl-di | 19.4690265    | 2 | 3 | 2 | 12.5  | 7.08  | 103 | 2 |
| Q70UQ0     | Inhibitor c | 9.14285714    | 3 | 3 | 3 | 39.3  | 9.17  | 103 | 3 |
| AOA087WYR3 | Tumor prot  | 25.6756757    | 4 | 4 | 4 | 23.8  | 6.55  | 90  | 4 |
| P35269     | General tr  | 8.89748549    | 3 | 3 | 3 | 58.2  | 7.49  | 124 | 3 |
| 000151     | PDZ and LI  | 18.2370821    | 3 | 3 | 3 | 36    | 7.02  | 54  | 3 |
| P58546     | Myotrophin  | 38.9830508    | 4 | 4 | 4 | 12.9  | 5.52  | 56  | 4 |
| 000487     | 26S protea  | 20.3225806    | 3 | 3 | 3 | 34.6  | 6.52  | 76  | 3 |
| J3QK89     | Calcium hon | 5.39374326    | 3 | 4 | 3 | 104.9 | 9.19  | 67  | 3 |
| K7EPH2     | Phenylalan  | 17.7248677    | 5 | 5 | 1 | 43    | 7.46  | 71  | 5 |
| A8KA19     | cDNA FLJ75  | 6.02910603    | 4 | 4 | 4 | 109.8 | 5.39  | 65  | 4 |
| A8K3Z5     | Nucleoporin | 15.6441718    | 3 | 3 | 3 | 34.8  | 9.36  | 74  | 3 |
| AOA0AOMR66 | RNA binding | 6.4321608     | 4 | 4 | 4 | 110.3 | 6.28  | 74  | 4 |
| Q9H2J7     | Sodium-depe | 6.57534247    | 3 | 3 | 3 | 81.8  | 5.19  | 71  | 3 |
| AOA140VJK2 | Glycerol-3- | 9.0784044     | 5 | 5 | 5 | 80.8  | 7.53  | 44  | 5 |
| Q6GMV2     | SET and MY  | 7.41626794    | 3 | 3 | 3 | 47.3  | 5.05  | 81  | 3 |
| Q9Y3Y2     | Chromatin   | 116.9354839   | 3 | 3 | 3 | 26.4  | 12.23 | 57  | 3 |
| Q9H9A6     | Leucine-ric | 6.1461794     | 4 | 4 | 4 | 68.2  | 6.43  | 111 | 4 |
| P61020     | Ras-relate  | 6.2790698     | 3 | 4 | 1 | 23.7  | 8.13  | 67  | 3 |
| Q9BRJ6     | Uncharacter | 24.2268041    | 3 | 3 | 3 | 22.1  | 9.64  | 50  | 3 |
| AOA024R473 | Mitochondri | 16.8674699    | 3 | 3 | 3 | 37.5  | 8.4   | 69  | 3 |
| Q8N6H7     | ADP-ribosyl | 19.78886756   | 3 | 3 | 1 | 56.7  | 7.99  | 77  | 3 |
| P47985     | Cytochrome  | 11.3138686    | 3 | 3 | 3 | 29.6  | 8.32  | 106 | 3 |
| P13807     | Glycogen [  | 5.97014925    | 3 | 4 | 3 | 83.7  | 6.18  | 87  | 3 |
| Q96EE3     | Nucleoporin | 15.2777778    | 3 | 3 | 3 | 39.6  | 8.09  | 67  | 3 |
| B3KWW6     | cDNA FLJ43  | 3.74501992    | 4 | 4 | 4 | 145.4 | 7.61  | 43  | 4 |
| P42126     | Enoyl-CoA   | 15.2317881    | 4 | 4 | 4 | 32.8  | 8.54  | 77  | 4 |
| Q9UNK0     | Syntaxin-8  | 13.9830508    | 2 | 3 | 2 | 26.9  | 4.98  | 89  | 2 |
| Q96QD8     | Sodium-cou  | 4.15019763    | 1 | 2 | 1 | 56    | 8     | 75  | 1 |
| Q59E89     | DnaJ (Hsp4  | 8.13953488    | 2 | 2 | 1 | 38.6  | 8.66  | 108 | 2 |
| AOA087XOM4 | Kanadaplin  | 8.49056604    | 3 | 4 | 3 | 82.8  | 5.1   | 38  | 3 |
| Q99720     | Sigma non-  | 9.41704036    | 2 | 3 | 2 | 25.1  | 5.96  | 85  | 2 |
| Q5SRE5     | Nucleoporin | 2.40137221    | 3 | 3 | 3 | 195.9 | 6.73  | 83  | 3 |
| Q06265     | Exosome con | 6.15034169    | 2 | 2 | 2 | 48.9  | 5.29  | 100 | 2 |
| B2RD51     | Proteasome  | 9.72222222    | 2 | 2 | 2 | 32.9  | 7.17  | 83  | 2 |
| Q9UKD2     | mRNA turnov | 27.6150628    | 5 | 6 | 5 | 27.5  | 8.29  | 76  | 5 |
| D6RDC3     | Transcripti | 26.6055046    | 2 | 3 | 1 | 11.8  | 5.9   | 92  | 2 |
| Q9BV44     | THUMP domai | 6.11439842    | 2 | 3 | 2 | 57    | 6.37  | 45  | 2 |
| Q96N66     | Lysophosph  | 8.68644068    | 3 | 4 | 3 | 52.7  | 8.97  | 72  | 3 |
| P11172     | Uridine 5'  | -7.91666667   | 3 | 3 | 3 | 52.2  | 7.24  | 63  | 3 |
| 043653     | Prostate st | 22.7642276    | 3 | 4 | 3 | 12.9  | 5.29  | 102 | 3 |
| HOY886     | NADH dehyd  | 7.2815534     | 1 | 3 | 1 | 23.5  | 9.6   | 88  | 1 |
| Q99426     | Tubulin-fo  | 15.9836066    | 3 | 3 | 3 | 27.3  | 5.15  | 65  | 3 |
| P49790     | Nuclear poi | 4.27118644    | 5 | 5 | 5 | 153.8 | 8.73  | 39  | 5 |
| Q15257     | Serine/thre | 17.5977654    | 4 | 5 | 4 | 40.6  | 5.94  | 58  | 4 |
| A8K5S3     | cDNA FLJ78  | 5.76923077    | 3 | 4 | 3 | 39.7  | 5.35  | 78  | 3 |
| Q15054     | DNA polyme  | 12.2317597    | 4 | 4 | 4 | 51.4  | 9.35  | 89  | 4 |
| Q6YN16     | Hydroxyster | 9.80861244    | 3 | 4 | 3 | 45.4  | 7.99  | 68  | 3 |
| Q9NZB2     | Constitutiv | 6.97674419    | 5 | 5 | 5 | 121.8 | 8.88  | 56  | 5 |
| 095169     | NADH dehyd  | 27.4193548    | 3 | 3 | 3 | 21.8  | 6.8   | 56  | 3 |
| B2R739     | cDNA, FLJ9  | 12.5          | 3 | 3 | 3 | 33.4  | 10.01 | 80  | 3 |
| AOA0AOMTH3 | Integrin-l  | 10.9730849    | 5 | 5 | 5 | 54.6  | 7.97  | 97  | 5 |
| AOA087WZM5 | Peptidylpr  | 24.0310078    | 2 | 3 | 2 | 14.9  | 9.52  | 83  | 2 |
| P18858     | DNA ligase  | 5.87595212    | 4 | 4 | 4 | 101.7 | 5.62  | 80  | 4 |
| Q9H6F5     | Coiled-coil | 14.1666667    | 4 | 4 | 4 | 40.2  | 10.33 | 59  | 4 |
| Q1ED39     | Lysine-ric  | 3.71179039    | 1 | 1 | 1 | 51.6  | 9.86  | 127 | 1 |
| 000743     | Serine/thre | 9.18032787    | 2 | 3 | 2 | 35.1  | 5.69  | 50  | 2 |
| Q01469     | Fatty acid- | 17.037037     | 2 | 2 | 2 | 15.2  | 7.01  | 122 | 2 |
| Q9NVP1     | ATP-depend  | 4.7761194     | 3 | 3 | 3 | 75.4  | 9.5   | 71  | 3 |
| AOA0AOMRI2 | Sorting ne  | 12.9186603    | 4 | 4 | 4 | 47.8  | 6.43  | 74  | 4 |
| Q92665     | 28S ribosom | 8.35443038    | 2 | 2 | 2 | 45.3  | 9.29  | 62  | 2 |
| B2RNR6     | Zinc finger | 5.30726257    | 4 | 4 | 4 | 116.9 | 9.04  | 82  | 4 |
| Q6RFH5     | WD repeat-  | 6.49350649    | 2 | 2 | 2 | 42.4  | 8.32  | 101 | 2 |
| Q00765     | Receptor ex | 6.34920635    | 3 | 3 | 3 | 21.5  | 8.1   | 103 | 3 |
| Q9BQ39     | ATP-depend  | 5.15603799    | 3 | 3 | 1 | 82.5  | 9.17  | 89  | 3 |
| Q15843     | NEDD8 OS=   | Hc 23.4567901 | 1 | 2 | 1 | 9.1   | 8.43  | 65  | 1 |
| Q9UBF2     | Coatomer st | 4.24799082    | 3 | 3 | 1 | 97.6  | 5.81  | 87  | 3 |
| P07919     | Cytochrome  | 29.6703297    | 2 | 3 | 2 | 10.7  | 4.44  | 81  | 2 |
| 075116     | Rho-associ  | 4.75504323    | 5 | 5 | 5 | 160.8 | 6.02  | 43  | 5 |



|            |               |              |   |   |   |       |       |     |   |
|------------|---------------|--------------|---|---|---|-------|-------|-----|---|
| Q9UI12     | V-type prot   | 8.69565217   | 2 | 2 | 2 | 55.8  | 6.48  | 70  | 2 |
| A0A024RA52 | Proteasome    | 19.6581197   | 4 | 5 | 4 | 25.9  | 7.43  | 68  | 4 |
| P27144     | Adenylate     | 126.0089686  | 3 | 3 | 3 | 25.3  | 8.4   | 33  | 3 |
| O95168     | NADH dehyd    | 33.3333333   | 3 | 3 | 3 | 15.2  | 9.85  | 59  | 3 |
| P43686     | 26S protea    | 12.4401914   | 3 | 3 | 3 | 47.3  | 5.21  | 65  | 3 |
| Q8NFB9     | MLL/SEPTIN    | 8.22898032   | 4 | 4 | 3 | 63.1  | 8.02  | 74  | 4 |
| Q9NV31     | U3 small nt   | 15.2173913   | 2 | 3 | 2 | 21.8  | 9.5   | 118 | 2 |
| P61081     | NEDD8-conj    | 21.3114754   | 3 | 3 | 3 | 20.9  | 7.69  | 67  | 3 |
| P16083     | Ribosyl dihy  | 28.5714286   | 4 | 4 | 4 | 25.9  | 6.29  | 61  | 4 |
| Q00403     | Transcripti   | 14.2405063   | 3 | 4 | 3 | 34.8  | 8.35  | 35  | 3 |
| A0A024R9Y6 | Guanine nuc   | 12.5429553   | 5 | 5 | 5 | 65.5  | 8.44  | 58  | 5 |
| B4E074     | cDNA FLJ58    | 12.5813449   | 3 | 3 | 3 | 50.7  | 6.98  | 70  | 3 |
| Q9NQ14     | Exosome con   | 21.2765957   | 3 | 3 | 3 | 25.2  | 7.59  | 62  | 3 |
| Q9H6T3     | RNA polymer   | 4.21052632   | 2 | 2 | 2 | 75.7  | 6.84  | 79  | 2 |
| Q8NBF2     | NHL repeat    | 10.7438017   | 4 | 4 | 4 | 79.4  | 5.55  | 56  | 4 |
| A0A0K0K1K7 | 6-phosphogl   | 20.9302326   | 4 | 5 | 4 | 27.5  | 6.05  | 77  | 4 |
| B2R6U8     | cDNA, FLJ9    | 21.5859031   | 4 | 4 | 4 | 26.2  | 8.82  | 70  | 4 |
| O95861     | 3' (2'), 5'   | -18.8311688  | 4 | 5 | 4 | 33.4  | 5.69  | 80  | 4 |
| Q9BV40     | Vesicle-ass   | 41           | 4 | 4 | 4 | 11.4  | 7.34  | 60  | 4 |
| A0A024QZS4 | Peptidyl-pi   | 14.0096618   | 2 | 2 | 2 | 22    | 9.38  | 65  | 2 |
| A0A024RD11 | Protein phc   | 5.98006645   | 3 | 3 | 2 | 69.9  | 8.13  | 70  | 3 |
| P49643     | DNA primase   | 7.46561886   | 3 | 3 | 3 | 58.8  | 7.91  | 74  | 3 |
| Q9H8H0     | Nucleolar p   | 4.45062587   | 3 | 3 | 3 | 81.1  | 6.07  | 90  | 3 |
| E5RJR5     | S-phase kir   | 38.6503067   | 4 | 5 | 4 | 18.7  | 4.7   | 77  | 4 |
| Q15370     | Elongin-B     | (39.8305085  | 3 | 3 | 3 | 13.1  | 4.88  | 21  | 3 |
| Q59EL4     | PRPF4 prote   | 5.95903166   | 3 | 3 | 3 | 60    | 7.56  | 74  | 3 |
| O95758     | Polypyrimic   | 8.33333333   | 4 | 4 | 2 | 59.7  | 9.04  | 64  | 4 |
| A0A087WYT3 | Prostaglanc   | 25.6097561   | 3 | 4 | 3 | 19.1  | 4.55  | 125 | 3 |
| Q6IPI1     | 60S ribosom   | 22.3602484   | 4 | 7 | 4 | 17.9  | 11.66 | 112 | 4 |
| Q9H845     | Acyl-CoA de   | 7.08534622   | 3 | 3 | 3 | 68.7  | 7.96  | 65  | 3 |
| P78318     | Immunoglob    | 12.6843658   | 3 | 3 | 3 | 39.2  | 5.38  | 77  | 3 |
| P19525     | Interferon-   | 6.17059891   | 3 | 4 | 3 | 62.1  | 8.4   | 63  | 3 |
| Q8TCT9     | Minor histc   | 12.7320955   | 3 | 5 | 3 | 41.5  | 6.43  | 71  | 3 |
| Q59EH3     | Acid phosph   | 32.7272727   | 3 | 3 | 3 | 18.7  | 7.88  | 66  | 3 |
| P19784     | Casein kin    | 15.4285714   | 3 | 4 | 3 | 41.2  | 8.56  | 62  | 3 |
| V9HW90     | Epididymis    | 8.81226054   | 3 | 3 | 3 | 56.2  | 8.5   | 52  | 3 |
| Q86YZ3     | Hornerin      | 051.68421053 | 1 | 1 | 1 | 282.2 | 10.04 | 97  | 1 |
| P49770     | Translatior   | 17.9487179   | 5 | 5 | 5 | 39    | 6.16  | 65  | 5 |
| Q15392     | Delta (24)-   | 6.58914729   | 4 | 4 | 4 | 60.1  | 8.16  | 67  | 4 |
| Q9NP72     | Ras-relatec   | 17.4757282   | 3 | 3 | 3 | 23    | 5.24  | 67  | 3 |
| Q9Y3B4     | Splicing fe   | 20.8         | 2 | 2 | 2 | 14.6  | 9.38  | 75  | 2 |
| Q14692     | Ribosome bi   | 4.91419657   | 4 | 4 | 4 | 145.7 | 6.44  | 56  | 4 |
| A0A024R8Z9 | Aspartyl-tf   | 6.20155039   | 3 | 4 | 3 | 73.5  | 8.02  | 49  | 3 |
| B4DR61     | Protein tra   | 6.63900415   | 3 | 4 | 3 | 52.9  | 8.24  | 50  | 3 |
| Q03701     | CCAAT/enha    | 3.22580645   | 3 | 3 | 3 | 120.9 | 5.94  | 108 | 3 |
| O43719     | HIV Tat-spc   | 9.66887417   | 3 | 3 | 3 | 85.8  | 4.4   | 53  | 3 |
| Q5HYG7     | Putative ur   | 9.69162996   | 3 | 4 | 3 | 50.3  | 7.8   | 59  | 3 |
| Q13144     | Translatior   | 7.76699029   | 4 | 4 | 4 | 80.3  | 5.08  | 57  | 4 |
| Q76LA1     | CSTB protei   | 24.4897959   | 1 | 2 | 1 | 11.1  | 7.56  | 54  | 1 |
| Q16698     | 2,4-dienoyl   | 8.95522388   | 2 | 2 | 2 | 36    | 9.28  | 84  | 2 |
| F8WF69     | Clathrin lili | 11.5384615   | 3 | 4 | 3 | 27.8  | 4.91  | 76  | 3 |
| Q53GW1     | Vesicle tra   | 6.2305296    | 3 | 3 | 3 | 72.3  | 6.38  | 96  | 3 |
| B2RDP6     | cDNA, FLJ9    | 6.95067265   | 2 | 3 | 2 | 49.4  | 4.92  | 72  | 2 |
| P42229     | Signal trar   | 4.40806045   | 3 | 3 | 3 | 90.6  | 6.39  | 48  | 3 |
| Q9NYL4     | Peptidyl-pi   | 17.9104478   | 2 | 2 | 2 | 22.2  | 9.39  | 36  | 2 |
| Q9BV57     | 1,2-dihydr    | 15.6424581   | 2 | 2 | 2 | 21.5  | 5.68  | 103 | 2 |
| A0A087WXU3 | Extended s    | 3.69163952   | 3 | 3 | 3 | 102.3 | 9.26  | 74  | 3 |
| Q13177     | Serine/thre   | 15.648855    | 5 | 5 | 5 | 58    | 5.96  | 45  | 5 |
| R4GN18     | Membrane c    | 19.2307692   | 2 | 2 | 2 | 8.5   | 9.07  | 79  | 2 |
| Q15418     | Ribosomal p   | 7.21088435   | 5 | 5 | 1 | 82.7  | 7.83  | 59  | 5 |
| HOYNJ9     | Deoxyuridir   | 25.1748252   | 3 | 4 | 1 | 15.5  | 7.9   | 80  | 3 |
| Q9UBK8     | Methionine    | 6.06896552   | 3 | 3 | 3 | 80.4  | 6.49  | 84  | 3 |
| Q5TB52     | 3'-phospho    | 4.88599349   | 2 | 2 | 2 | 69.5  | 8.03  | 105 | 2 |
| Q96E11     | Ribosome-rc   | 13.3587786   | 3 | 3 | 3 | 29.3  | 9.79  | 53  | 3 |
| Q13596     | Sorting ne    | 7.85440613   | 3 | 3 | 3 | 59    | 5.15  | 63  | 3 |
| Q96KP4     | Cytosolic r   | 12.4210526   | 4 | 4 | 4 | 52.8  | 5.97  | 54  | 4 |
| A8ASI8     | BH3 interac   | 21.025641    | 2 | 2 | 2 | 22    | 5.44  | 93  | 2 |
| P78310     | Coxsackievi   | 16.1643836   | 4 | 4 | 4 | 40    | 7.56  | 44  | 4 |
| J3KQ48     | Peptidyl-tf   | 18.8888889   | 2 | 2 | 2 | 19.3  | 8.73  | 70  | 2 |
| Q15286     | Ras-relatec   | 17.9104478   | 3 | 4 | 2 | 23    | 8.29  | 133 | 3 |
| Q9NNW7     | Thioredoxir   | 8.58778626   | 4 | 4 | 4 | 56.5  | 7.5   | 71  | 4 |
| Q9Y570     | Protein phc   | 16.8393782   | 5 | 5 | 5 | 42.3  | 5.97  | 52  | 5 |
| A0A024RDV7 | Importin su   | 13.243762    | 5 | 5 | 3 | 57.8  | 4.94  | 70  | 5 |

|            |             |              |   |   |   |       |       |     |   |
|------------|-------------|--------------|---|---|---|-------|-------|-----|---|
| Q16186     | Proteasomal | 18.84520885  | 3 | 3 | 3 | 42.1  | 5.07  | 48  | 3 |
| B4E1J8     | cDNA FLJ561 | 14.2857143   | 3 | 4 | 3 | 27.2  | 9.66  | 80  | 3 |
| P18615     | Negative el | 11.3157895   | 3 | 3 | 3 | 43.2  | 9.33  | 38  | 3 |
| P49821     | NADH dehyd  | 7.75862069   | 2 | 3 | 2 | 50.8  | 8.21  | 68  | 2 |
| A8K8B0     | cDNA FLJ762 | 7.79610195   | 3 | 3 | 2 | 73.5  | 5.1   | 47  | 3 |
| Q92930     | Ras-relate  | 21.7391304   | 4 | 5 | 2 | 23.6  | 9.07  | 139 | 4 |
| Q9NZ01     | Very-long-  | c14.6103896  | 4 | 4 | 4 | 36    | 9.45  | 78  | 4 |
| Q59FR8     | Galectin (f | 6.97674419   | 2 | 3 | 2 | 27.1  | 8.41  | 95  | 2 |
| Q59GW7     | Replicatio  | 15.954416    | 4 | 4 | 4 | 39.6  | 7.81  | 63  | 4 |
| Q12873     | Chromodom   | 3.5          | 5 | 5 | 1 | 226.5 | 7.3   | 41  | 5 |
| Q9NY12     | H/ACA ribo  | 8.29493088   | 1 | 2 | 1 | 22.3  | 10.92 | 42  | 1 |
| Q5BKZ1     | DBIRD comp  | 5.8419244    | 3 | 3 | 3 | 65.6  | 5.15  | 73  | 3 |
| P14854     | Cytochrome  | 75.5813953   | 4 | 4 | 4 | 10.2  | 7.05  | 43  | 4 |
| Q9NY61     | Protein AA  | 18.39285714  | 2 | 2 | 2 | 63.1  | 4.94  | 59  | 2 |
| Q5SQP8     | C-terminal- | 5.65302144   | 2 | 2 | 2 | 56.1  | 6.96  | 54  | 2 |
| Q92542     | Nicastrin ( | 4.7954866    | 3 | 3 | 3 | 78.4  | 5.99  | 73  | 3 |
| P10620     | Microsomal  | 12.2580645   | 2 | 2 | 2 | 17.6  | 9.39  | 68  | 2 |
| O75489     | NADH dehyd  | 15.9090909   | 3 | 3 | 3 | 30.2  | 7.5   | 60  | 3 |
| A1L3A7     | Nuclear fr  | 7.76978417   | 3 | 3 | 3 | 76.1  | 8.7   | 34  | 3 |
| O94925     | Glutaminas  | 5.97907324   | 3 | 3 | 3 | 73.4  | 7.77  | 86  | 3 |
| Q5T3I0     | G patch do  | 13.9013453   | 3 | 3 | 3 | 50.4  | 9.63  | 45  | 3 |
| X6RLX0     | ELKS/Rab6-  | i4.73214286  | 3 | 3 | 3 | 128.4 | 5.97  | 68  | 3 |
| Q9NW82     | WD repeat-  | c6.42201835  | 3 | 3 | 3 | 73.2  | 6.33  | 60  | 3 |
| Q9COD9     | Ethanolam   | ir4.53400504 | 2 | 3 | 2 | 45.2  | 6.6   | 52  | 2 |
| P51116     | Fragile X n | 4.75482912   | 3 | 3 | 2 | 74.2  | 6.23  | 61  | 3 |
| AOA1BOGVF3 | Carnitine ( | 5.52238806   | 3 | 3 | 3 | 75.2  | 8.5   | 76  | 3 |
| O43252     | Bifunction- | 6.57051282   | 3 | 3 | 3 | 70.8  | 6.86  | 66  | 3 |
| AOA140VJP2 | Testicular  | 8.68263473   | 2 | 2 | 2 | 37.5  | 7.36  | 71  | 2 |
| B2RDI5     | cDNA, FLJ9  | 6.74229692   | 4 | 4 | 4 | 81.8  | 5.54  | 67  | 4 |
| P62877     | E3 ubiquiti | 17.5925926   | 2 | 3 | 2 | 12.3  | 6.96  | 81  | 2 |
| Q96L92     | Sorting ne  | 6.09981516   | 3 | 3 | 3 | 61.2  | 6.49  | 70  | 3 |
| P43003     | Excitatory  | 5.90405904   | 2 | 2 | 2 | 59.5  | 8.41  | 76  | 2 |
| Q9UJX3     | Anaphase-p  | 6.1769616    | 2 | 3 | 2 | 66.8  | 5.64  | 47  | 2 |
| Q14232     | Translatio  | 9.50819672   | 3 | 3 | 3 | 33.7  | 7.33  | 83  | 3 |
| AOA024R7J0 | Protein kir | 16.2393162   | 4 | 4 | 4 | 40.6  | 8.79  | 55  | 4 |
| B2R5Y4     | cDNA, FLJ9  | 7.8994614    | 4 | 4 | 4 | 65.6  | 6.64  | 40  | 4 |
| AOA024QYX3 | RNA bindin  | 28.6624204   | 3 | 3 | 3 | 17.2  | 8.91  | 33  | 3 |
| B2RE11     | cDNA, FLJ9  | 6.4772727    | 2 | 2 | 2 | 18.4  | 9.44  | 74  | 2 |
| Q8NEY8     | Periphilin- | 4.80349345   | 2 | 2 | 2 | 52.7  | 9.11  | 83  | 2 |
| AOA024R7E1 | Protein YIF | 9.17721519   | 1 | 1 | 1 | 35.1  | 5.73  | 60  | 1 |
| B3KV00     | cDNA FLJ41  | (14.025974   | 3 | 3 | 3 | 42.1  | 7.34  | 56  | 3 |
| Q96T37     | Putative R  | 6.44831116   | 3 | 3 | 3 | 107.1 | 10.08 | 48  | 3 |
| O00178     | GTP-binding | 5.68011958   | 3 | 3 | 3 | 72.4  | 8.34  | 83  | 3 |
| B2RAR2     | cDNA, FLJ9  | 10.4368932   | 3 | 3 | 3 | 46.6  | 7.18  | 52  | 3 |
| Q14TF0     | Glutamate-  | c8.32025118  | 4 | 4 | 4 | 72.7  | 6.09  | 42  | 4 |
| Q5LJA9     | Ubiquitin c | 15.2173913   | 5 | 5 | 5 | 41.7  | 5.53  | 49  | 5 |
| Q9BW92     | Threonine-- | 5.98885794   | 5 | 6 | 5 | 81    | 7.3   | 37  | 5 |
| AOA087WU53 | Magnesium   | 16.26702997  | 2 | 2 | 2 | 41.5  | 9.94  | 103 | 2 |
| B4E0E0     | cDNA FLJ54  | 6.52920962   | 1 | 2 | 1 | 32.5  | 9.51  | 52  | 1 |
| O95602     | DNA-direct  | 1.86046512   | 3 | 3 | 3 | 194.7 | 7.03  | 86  | 3 |
| F8VXU5     | Vacuolar p  | 4.6728972    | 1 | 2 | 1 | 24    | 8.18  | 80  | 1 |
| D3DU92     | RNA bindin  | 10.1639344   | 3 | 3 | 3 | 34.2  | 11.84 | 35  | 3 |
| P60468     | Protein tr  | 37.5         | 3 | 3 | 3 | 10    | 11.56 | 78  | 3 |
| P11233     | Ras-relate  | 12.6213592   | 2 | 3 | 1 | 23.6  | 7.11  | 72  | 2 |
| Q99590     | Protein SC  | 2.3923445    | 2 | 3 | 2 | 164.6 | 8.41  | 72  | 2 |
| O15173     | Membrane-   | a13.9013453  | 3 | 3 | 2 | 23.8  | 4.88  | 89  | 3 |
| V9HW09     | Epididymis  | 9.42857143   | 4 | 4 | 4 | 39.6  | 9.7   | 63  | 4 |
| P55263     | Adenosine   | 16.07734807  | 3 | 3 | 3 | 40.5  | 6.7   | 67  | 3 |
| P63313     | Thymosin b  | 36.3636364   | 2 | 2 | 2 | 5     | 5.36  | 66  | 2 |
| Q14165     | Malectin O  | 8.56164384   | 2 | 2 | 2 | 32.2  | 5.41  | 86  | 2 |
| Q8NI27     | THO complex | 2.19711237   | 3 | 3 | 3 | 182.7 | 8.44  | 68  | 3 |
| Q9Y2P8     | RNA 3'-ter  | n10.4557641  | 3 | 3 | 3 | 40.8  | 9.26  | 66  | 3 |
| A4LAA3     | Alpha thal  | 2.36757624   | 4 | 4 | 4 | 282.4 | 6.55  | 54  | 4 |
| Q5IRN4     | Myocyte en  | 7.59493671   | 3 | 4 | 2 | 50.4  | 7.44  | 55  | 3 |
| Q5SRQ6     | Casein kin  | 14.5299145   | 2 | 3 | 2 | 26.9  | 5.96  | 50  | 2 |
| Q9BV38     | WD repeat-  | c6.71296296  | 3 | 3 | 3 | 47.4  | 6.7   | 73  | 3 |
| Q8IYB8     | ATP-depend  | 5.34351145   | 3 | 3 | 3 | 87.9  | 7.99  | 75  | 3 |
| Q6P3X3     | Tetratric   | 4.98220641   | 3 | 4 | 3 | 96.6  | 5.59  | 36  | 3 |
| AOA024R6D1 | NIMA (Never | 2.6557712    | 2 | 2 | 2 | 107.1 | 5.73  | 65  | 2 |
| Q96BN8     | Ubiquitin   | 17.38636364  | 2 | 3 | 2 | 40.2  | 5.47  | 36  | 2 |
| Q96KB5     | Lymphokine- | 18.6335404   | 4 | 4 | 4 | 36.1  | 5.12  | 51  | 4 |
| AOA024QZY5 | PRP4 pre-m  | f5.75968222  | 4 | 4 | 4 | 116.9 | 10.26 | 33  | 4 |
| D7RF68     | AGTRAP-BRA  | F6.53266332  | 2 | 3 | 2 | 66.2  | 8.9   | 71  | 2 |

|            |                        |   |    |   |       |       |     |   |
|------------|------------------------|---|----|---|-------|-------|-----|---|
| Q4GON4     | NAD kinase 8.37104072  | 3 | 3  | 3 | 49.4  | 8.18  | 76  | 3 |
| B4DL85     | cDNA FLJ60€21.6346154  | 3 | 3  | 3 | 22.1  | 9.31  | 77  | 3 |
| Q9UPN9     | E3 ubiquiti2.83939663  | 3 | 3  | 3 | 122.5 | 6.67  | 59  | 3 |
| Q9NX47     | E3 ubiquiti15.4676259  | 3 | 3  | 3 | 31.2  | 8.7   | 34  | 3 |
| Q641Q2     | WASH comple3.65398956  | 3 | 3  | 3 | 147.1 | 4.81  | 43  | 3 |
| G3V2S9     | SRA stem-1c22.5806452  | 2 | 2  | 2 | 13.9  | 11.09 | 50  | 2 |
| Q9UKN8     | General tr€14.1119221  | 5 | 5  | 5 | 91.9  | 6.65  | 25  | 5 |
| AOA087WTWO | E3 ubiquiti4.78413069  | 3 | 3  | 3 | 96.6  | 8.34  | 93  | 3 |
| G1AUC5     | Protein phc18.0487805  | 3 | 3  | 3 | 23.1  | 4.87  | 88  | 3 |
| B2RD36     | cDNA, FLJ9€ 13.877551  | 3 | 5  | 3 | 28    | 6.79  | 79  | 3 |
| Q02978     | Mitochondri11.4649682  | 3 | 4  | 3 | 34    | 9.91  | 92  | 3 |
| 094874     | E3 UFM1-prc6.29722922  | 4 | 4  | 4 | 89.5  | 6.79  | 56  | 4 |
| B3KNS8     | cDNA FLJ30€17.1745152  | 3 | 3  | 3 | 41.5  | 10.59 | 25  | 3 |
| E7ESC6     | Exportin-7 2.94117647  | 3 | 3  | 3 | 124   | 6.48  | 63  | 3 |
| P25815     | Protein S1€13.6842105  | 1 | 1  | 1 | 10.4  | 4.88  | 94  | 1 |
| 043159     | Ribosomal F6.57894737  | 2 | 2  | 2 | 50.7  | 9.42  | 72  | 2 |
| B2R6D8     | CDC42 effec14.3258427  | 3 | 3  | 3 | 38    | 5.19  | 79  | 3 |
| P13995     | Bifunction€9.14285714  | 2 | 2  | 2 | 37.9  | 8.73  | 61  | 2 |
| P14174     | Macrophage 17.3913043  | 2 | 4  | 2 | 12.5  | 7.88  | 141 | 2 |
| Q7Z4V5     | Hepatoma-d€3.27868852  | 2 | 3  | 1 | 74.3  | 7.49  | 56  | 2 |
| Q8WVC0     | RNA polymer3.45345345  | 2 | 2  | 2 | 75.4  | 4.51  | 83  | 2 |
| Q9GZU8     | Protein FA€9.84251969  | 2 | 2  | 2 | 28.9  | 5.45  | 90  | 2 |
| P57105     | Synaptojan19.3103448   | 2 | 2  | 2 | 15.9  | 6.3   | 74  | 2 |
| Q01085     | Nucleolysir 9.6        | 3 | 3  | 3 | 41.6  | 7.74  | 79  | 3 |
| B4DPG9     | cDNA FLJ59€6.03448276  | 2 | 2  | 2 | 37.5  | 9.89  | 89  | 2 |
| Q96GM8     | Target of F11.5686275  | 3 | 3  | 3 | 56.5  | 7.18  | 31  | 3 |
| A6NEM2     | Host cell 11.39423077  | 2 | 2  | 2 | 213.3 | 7.33  | 66  | 2 |
| Q9HD20     | Manganese-t 4.9833887  | 3 | 3  | 3 | 132.9 | 8.13  | 54  | 3 |
| P46459     | Vesicle-fus4.97311828  | 3 | 3  | 3 | 82.5  | 6.95  | 24  | 3 |
| Q06203     | Amidophospl11.9922631  | 3 | 3  | 3 | 57.4  | 6.76  | 53  | 3 |
| Q9Y5J1     | U3 small nt5.57553957  | 2 | 2  | 2 | 62    | 8.76  | 82  | 2 |
| Q9Y3E8     | CGI-150 prc8.33333333  | 3 | 3  | 3 | 55    | 8.7   | 33  | 3 |
| Q9BQ69     | O-acetyl-Al10.1538462  | 2 | 2  | 2 | 35.5  | 9.51  | 65  | 2 |
| AOA024QYW3 | Proteolipic18.4210526  | 2 | 4  | 2 | 16.7  | 7.24  | 101 | 2 |
| Q9UKF6     | Cleavage ar 6.7251462  | 3 | 3  | 3 | 77.4  | 5.6   | 29  | 3 |
| Q7L9L4     | MOB kinase 11.1111111  | 2 | 2  | 2 | 25.1  | 6.73  | 79  | 2 |
| P22059     | Oxysterol-t 5.3283767  | 3 | 4  | 3 | 89.4  | 7.3   | 53  | 3 |
| Q8WW12     | PEST protec23.5955056  | 3 | 3  | 3 | 18.9  | 7.49  | 43  | 3 |
| Q8N9T8     | Protein KR16.54338549  | 3 | 3  | 3 | 82.5  | 5.14  | 66  | 3 |
| Q9H0S4     | Probable A113.6263736  | 4 | 4  | 4 | 50.6  | 9.1   | 59  | 4 |
| Q9H0L4     | Cleavage st4.70779221  | 2 | 2  | 2 | 64.4  | 7.25  | 92  | 2 |
| Q96S55     | ATPase WRN13.60902256  | 2 | 2  | 2 | 72.1  | 6.1   | 96  | 2 |
| B4DIS3     | Dpy-30-like33.3333333  | 2 | 3  | 2 | 13.9  | 7.5   | 48  | 2 |
| F5GYJ8     | Ubiquitin 119.9300699  | 3 | 11 | 3 | 32.3  | 4.96  | 43  | 3 |
| Q9NVH1     | DnaJ homolc10.3756708  | 4 | 4  | 4 | 63.2  | 8.4   | 31  | 4 |
| Q14696     | LDLR chapei22.6495726  | 3 | 3  | 3 | 26.1  | 7.78  | 24  | 3 |
| Q99442     | Translocati7.01754386  | 3 | 3  | 3 | 45.8  | 7.12  | 70  | 3 |
| Q8NBJ4     | Golgi membi5.23690773  | 2 | 2  | 2 | 45.3  | 4.97  | 67  | 2 |
| Q86XZ4     | Spermatoger 4.95412844 | 2 | 2  | 2 | 59.5  | 8.9   | 70  | 2 |
| Q9NY27     | Serine/thre8.15347722  | 2 | 2  | 2 | 46.9  | 4.54  | 91  | 2 |
| P20962     | Parathyrosi25.4901961  | 2 | 2  | 2 | 11.5  | 4.16  | 99  | 2 |
| Q6KC79     | Nipped-B-1i1.10556348  | 3 | 3  | 3 | 315.9 | 7.91  | 46  | 3 |
| Q9BVI4     | Nucleolar c12.0155039  | 3 | 3  | 3 | 58.4  | 7.49  | 43  | 3 |
| Q9UBI6     | Guanine nuc41.6666667  | 3 | 3  | 3 | 8     | 8.97  | 67  | 3 |
| Q13636     | Ras-relatec16.4948454  | 3 | 3  | 3 | 21.6  | 7.06  | 85  | 3 |
| 014732     | Inositol mc10.4166667  | 3 | 3  | 3 | 31.3  | 6.61  | 58  | 3 |
| Q13951     | Core-bindir14.2857143  | 2 | 2  | 2 | 21.5  | 6.6   | 93  | 2 |
| Q9H7E9     | UPF0488 prc17.0305677  | 2 | 2  | 2 | 25    | 9.95  | 46  | 2 |
| Q96P48     | Arf-GAP wi11.03448276  | 1 | 1  | 1 | 162.1 | 6.23  | 97  | 1 |
| P20645     | Cation-depe5.05415162  | 1 | 1  | 1 | 31    | 5.83  | 80  | 1 |
| Q6IPL9     | HMGAl prote13.0841121  | 1 | 4  | 1 | 11.6  | 11.06 | 92  | 1 |
| B3KQ21     | cDNA FLJ32€6.53266332  | 3 | 3  | 3 | 70.2  | 7.46  | 69  | 3 |
| B2R642     | cDNA, FLJ9€8.35913313  | 4 | 4  | 4 | 71.6  | 5.76  | 47  | 4 |
| AOA0S2Z4R4 | Hepatocyte 4.5045045   | 3 | 3  | 3 | 86.1  | 6.16  | 50  | 3 |
| Q9NXF1     | Testis-expi3.98277718  | 2 | 3  | 2 | 105.6 | 9.36  | 76  | 2 |
| Q9H7B2     | Ribosome pi16.3398693  | 4 | 4  | 4 | 35.6  | 9.99  | 34  | 4 |
| Q14019     | Coactosin-113.3802817  | 2 | 3  | 2 | 15.9  | 5.67  | 84  | 2 |
| Q9Y263     | Phospholip€4.27672956  | 2 | 2  | 2 | 87.1  | 6.37  | 64  | 2 |
| 075530     | Polycomb pi10.6575964  | 4 | 4  | 4 | 50.2  | 7.03  | 44  | 4 |
| P18031     | Tyrosine-pi5.74712644  | 2 | 2  | 2 | 49.9  | 6.27  | 81  | 2 |
| B2RAM6     | cDNA, FLJ9€ 3.125      | 3 | 3  | 3 | 119.1 | 5.72  | 38  | 3 |
| 043818     | U3 small nt10.9473684  | 4 | 4  | 4 | 51.8  | 7.85  | 59  | 4 |
| P50135     | Histamine 1 5.1369863  | 1 | 2  | 1 | 33.3  | 5.34  | 46  | 1 |

|            |                        |   |   |   |       |       |     |   |
|------------|------------------------|---|---|---|-------|-------|-----|---|
| Q01780     | Exosome con4.74576271  | 2 | 2 | 2 | 100.8 | 8.46  | 69  | 2 |
| Q9NT15     | Sister chr2.55701451   | 2 | 2 | 2 | 164.6 | 8.47  | 69  | 2 |
| Q9BW27     | Nuclear por7.62195122  | 4 | 4 | 4 | 75    | 5.55  | 47  | 4 |
| B2R728     | cDNA, FLJ9:5.08744038  | 3 | 3 | 3 | 67.6  | 5.43  | 61  | 3 |
| P07108     | Acyl-CoA-bi37.9310345  | 2 | 2 | 2 | 10    | 6.57  | 49  | 2 |
| AOA087WWM0 | Trafficking18.0851064  | 3 | 3 | 3 | 21.2  | 5.06  | 71  | 3 |
| AOA140VKC8 | Testis tis:13.0841121  | 3 | 3 | 3 | 35.9  | 6.6   | 27  | 3 |
| Q9NRX1     | RNA-binding10.3174603  | 2 | 2 | 2 | 27.9  | 9.73  | 67  | 2 |
| P67812     | Signal pep16.7597765   | 3 | 3 | 3 | 20.6  | 9.48  | 61  | 3 |
| P51151     | Ras-relatec 15.920398  | 2 | 2 | 2 | 22.8  | 5.47  | 33  | 2 |
| P78406     | mRNA export8.42391304  | 3 | 3 | 3 | 40.9  | 7.83  | 103 | 3 |
| Q9NPD3     | Exosome con9.79591837  | 2 | 2 | 2 | 26.4  | 6.52  | 61  | 2 |
| Q5RKKV6    | Exosome con16.1764706  | 2 | 2 | 2 | 28.2  | 6.28  | 48  | 2 |
| AOA0B4J1V9 | Helicase, 15.42986425  | 4 | 4 | 4 | 102.7 | 7.65  | 49  | 4 |
| Q969S3     | Zinc finger10.2725367  | 3 | 3 | 3 | 54.2  | 6.15  | 59  | 3 |
| P35573     | Glycogen de 2.154047   | 3 | 3 | 3 | 174.7 | 6.76  | 45  | 3 |
| O15020     | Spectrin b:1.54811715  | 3 | 3 | 2 | 271.2 | 6.11  | 55  | 3 |
| Q96JB2     | Conserved c2.17391304  | 2 | 3 | 2 | 94    | 5.57  | 68  | 2 |
| B2R9T9     | cDNA, FLJ9:9.46502058  | 2 | 2 | 2 | 26.2  | 10.67 | 80  | 2 |
| Q6PL18     | ATPase fami3.02158273  | 3 | 3 | 3 | 158.5 | 6.32  | 59  | 3 |
| AOA024RC37 | Uncharacteri10.5769231 | 3 | 3 | 3 | 35.7  | 7.55  | 104 | 3 |
| B5BU16     | Mitogen-act18.8622754  | 4 | 4 | 4 | 37.4  | 7.06  | 49  | 4 |
| Q5TH30     | NDRG family9.79381443  | 2 | 4 | 2 | 42.8  | 5.33  | 63  | 2 |
| B7ZM99     | MTHFD1L prc5.82226762  | 4 | 4 | 3 | 105.8 | 8.06  | 39  | 4 |
| Q9NQ15     | Exosome con18.9090909  | 2 | 4 | 2 | 29.6  | 8.1   | 88  | 2 |
| P61964     | WD repeat-c12.2754491  | 3 | 3 | 3 | 36.6  | 8.27  | 31  | 3 |
| Q68CQ4     | Digestive c4.23280423  | 3 | 4 | 3 | 87    | 5.88  | 64  | 3 |
| Q9GZY8     | Mitochondri11.4035088  | 2 | 2 | 2 | 38.4  | 8.95  | 64  | 2 |
| Q5SRD1     | Putative mi10.8949416  | 2 | 2 | 2 | 28    | 9.39  | 81  | 2 |
| AOA024RC67 | Protein re: 10.483871  | 5 | 5 | 4 | 71.6  | 6.57  | 50  | 5 |
| O75663     | TIP41-like 15.0735294  | 3 | 3 | 3 | 31.4  | 5.91  | 44  | 3 |
| P32320     | Cytidine de28.7671233  | 2 | 3 | 2 | 16.2  | 6.92  | 38  | 2 |
| O95197     | Reticulon-:4.84496124  | 2 | 2 | 1 | 112.5 | 4.96  | 68  | 2 |
| B2R679     | cDNA, FLJ9:15.1515152  | 3 | 4 | 3 | 22.3  | 7.03  | 70  | 3 |
| Q8NB16     | Mixed line:11.8895966  | 4 | 4 | 4 | 54.4  | 8.82  | 49  | 4 |
| Q9Y5K6     | CD2-associ:5.79029734  | 3 | 3 | 3 | 71.4  | 6.4   | 73  | 3 |
| P48735     | Isocitrate 8.84955752  | 3 | 3 | 3 | 50.9  | 8.69  | 45  | 3 |
| Q9Y2S6     | Translator 37.5        | 3 | 3 | 3 | 7.1   | 9.99  | 59  | 3 |
| Q15397     | Pumilio hon4.78395062  | 3 | 3 | 3 | 73.5  | 9.64  | 60  | 3 |
| P30040     | Endoplasmic15.3256705  | 3 | 4 | 3 | 29    | 7.31  | 68  | 3 |
| Q8NDC0     | MAPK-inter:6.93877551  | 1 | 2 | 1 | 24.3  | 5.62  | 67  | 1 |
| Q8TEM4     | FLJ00169 p11.5740741   | 3 | 3 | 3 | 46.5  | 11.55 | 39  | 3 |
| O00267     | Transcripti4.69181233  | 2 | 2 | 2 | 120.9 | 5.06  | 66  | 2 |
| AOA024R371 | PRA1 family 10.106383  | 1 | 2 | 1 | 21.6  | 9.77  | 77  | 1 |
| Q4G176     | Acyl-CoA sy6.07638889  | 2 | 3 | 2 | 64.1  | 8.37  | 54  | 2 |
| P29372     | DNA-3-methy9.06040268  | 2 | 2 | 2 | 32.8  | 9.57  | 73  | 2 |
| Q15819     | Ubiquitin-c13.7931034  | 2 | 2 | 2 | 16.4  | 8.09  | 83  | 2 |
| Q8NBU5     | ATPase fami9.41828255  | 2 | 2 | 2 | 40.7  | 6.9   | 42  | 2 |
| P41227     | N-alpha-acc25.9574468  | 3 | 3 | 3 | 26.4  | 5.64  | 45  | 3 |
| Q5JSH3     | WD repeat-c3.61445783  | 3 | 3 | 3 | 101.3 | 5.45  | 25  | 3 |
| Q9NX40     | OClA domair20.8163265  | 4 | 4 | 4 | 27.6  | 7.49  | 46  | 4 |
| Q8ND56     | Protein LSA9.93520518  | 3 | 3 | 3 | 50.5  | 9.52  | 39  | 3 |
| G5E975     | SWI/SNF rel7.36040609  | 2 | 2 | 2 | 45    | 5.76  | 60  | 2 |
| AOA087X256 | WASH comple1.78875639  | 2 | 2 | 2 | 136.4 | 7.44  | 82  | 2 |
| Q8WWQ0     | PH-interact1.70236134  | 2 | 2 | 2 | 206.6 | 8.85  | 48  | 2 |
| Q8TEA8     | D-tyrosyl-114.8325359  | 2 | 2 | 2 | 23.4  | 8.24  | 56  | 2 |
| B5ME97     | Septin 10, 6.25        | 3 | 3 | 3 | 62.9  | 6.83  | 64  | 3 |
| Q8WTT2     | Nucleolar c 4.875      | 3 | 3 | 3 | 92.5  | 9.17  | 37  | 3 |
| Q9Y5U9     | Immediate e24.3902439  | 1 | 1 | 1 | 9     | 8.22  | 84  | 1 |
| A8K4G7     | cDNA FLJ78:6.98198198  | 2 | 2 | 1 | 49.2  | 6.76  | 84  | 2 |
| B1AKJ6     | Oxysterol-t 3.2388664  | 2 | 2 | 2 | 83.7  | 6.48  | 63  | 2 |
| Q597H1     | Transforma10.4060914   | 2 | 2 | 2 | 42.8  | 5.82  | 39  | 2 |
| Q5ZPR3     | CD276 anti:6.74157303  | 2 | 2 | 2 | 57.2  | 4.91  | 34  | 2 |
| AOA024R2M7 | Oxidative-:7.02087287  | 2 | 2 | 2 | 58    | 6.43  | 74  | 2 |
| Q86TU7     | Histone-ly: 6.3973064  | 3 | 3 | 3 | 67.2  | 5.96  | 42  | 3 |
| Q9BRA2     | Thioredoxin19.5121951  | 2 | 2 | 2 | 13.9  | 5.52  | 61  | 2 |
| Q96CW5     | Gamma-tubul4.96141125  | 3 | 4 | 3 | 103.5 | 8.12  | 30  | 3 |
| Q9Y4W6     | AFG3-like p3.01129235  | 2 | 2 | 2 | 88.5  | 8.66  | 69  | 2 |
| Q6NYC1     | Bifunction:3.22580645  | 1 | 1 | 1 | 46.4  | 8.69  | 89  | 1 |
| B2R983     | cDNA, FLJ9:19.0871369  | 4 | 5 | 4 | 27.5  | 6.6   | 42  | 4 |
| HOY368     | Dolichol-pf9.15254237  | 2 | 2 | 2 | 33.3  | 9.14  | 71  | 2 |
| Q10713     | Mitochondri7.04761905  | 3 | 3 | 3 | 58.2  | 6.92  | 34  | 3 |
| AOA0S2Z5U6 | Pyrraline-: 9.6875     | 2 | 2 | 2 | 33.6  | 7.77  | 54  | 2 |

|            |                                                   |   |   |   |       |       |     |   |
|------------|---------------------------------------------------|---|---|---|-------|-------|-----|---|
| Q9UJW0     | Dynactin subunit 11                               | 4 | 4 | 4 | 52.3  | 7.34  | 48  | 4 |
| Q8WUY1     | Protein THF11                                     | 3 | 3 | 3 | 23.9  | 9.55  | 75  | 3 |
| AOA1BOGVH5 | Alpha-ketoglutarate-dependent                     | 1 | 1 | 1 | 64.1  | 5.38  | 110 | 1 |
| Q13427     | Peptidyl-prolyl isomerase 5                       | 3 | 3 | 3 | 88.6  | 10.29 | 55  | 3 |
| Q9UL25     | Ras-related protein 11                            | 2 | 2 | 2 | 24.3  | 7.94  | 80  | 2 |
| Q92614     | Unconventional protein 3                          | 3 | 4 | 3 | 233   | 6.3   | 31  | 3 |
| Q7Z4Q2     | HEAT repeat 4                                     | 2 | 2 | 2 | 74.5  | 5.11  | 55  | 2 |
| P48634     | Protein PRF2                                      | 3 | 3 | 3 | 228.7 | 9.45  | 23  | 3 |
| Q96T51     | RUN and FYV6                                      | 3 | 3 | 3 | 79.8  | 5.74  | 28  | 3 |
| Q5VZU9     | Tripeptidyl aminopeptidase 3                      | 4 | 4 | 4 | 139.7 | 6.52  | 43  | 4 |
| Q16763     | Ubiquitin C-terminal hydrolase 6                  | 1 | 2 | 1 | 23.8  | 8.38  | 54  | 1 |
| B4DU42     | cDNA FLJ5616                                      | 3 | 3 | 3 | 71.8  | 7.3   | 41  | 3 |
| AOMZ66     | Shootin-1 C-terminal domain 3                     | 2 | 2 | 2 | 71.6  | 5.33  | 63  | 2 |
| Q9H089     | Large subunit 4                                   | 3 | 3 | 3 | 75.2  | 6.38  | 56  | 3 |
| P04181     | Ornithine decarboxylase 5                         | 2 | 2 | 2 | 48.5  | 7.03  | 70  | 2 |
| Q13242     | Serine/arginine methyltransferase 13              | 2 | 2 | 1 | 25.5  | 8.65  | 0   | 2 |
| Q99805     | Transmembrane protein 5                           | 2 | 2 | 2 | 75.7  | 7.44  | 61  | 2 |
| Q14CX7     | N-alpha-acetyltransferase 2                       | 2 | 2 | 2 | 112.2 | 6.64  | 46  | 2 |
| P81605     | Dermcidin C-terminal domain 12                    | 1 | 1 | 1 | 11.3  | 6.54  | 82  | 1 |
| Q9Y2R4     | Probable A14                                      | 2 | 3 | 2 | 67.5  | 9.67  | 60  | 2 |
| Q5ST80     | FLOT1 protein 11                                  | 4 | 4 | 4 | 47.3  | 7.49  | 36  | 4 |
| Q9NRF8     | CTP synthase 4                                    | 2 | 2 | 2 | 65.6  | 6.9   | 67  | 2 |
| P53801     | Pituitary tumor transforming protein 16           | 2 | 2 | 2 | 20.3  | 8.79  | 59  | 2 |
| Q12974     | Protein tyrosine phosphatase 16                   | 2 | 2 | 2 | 19.1  | 8.37  | 65  | 2 |
| Q5JWF2     | Guanine nucleotides exchange factor 5             | 2 | 4 | 1 | 111   | 5.03  | 108 | 2 |
| Q7L5D6     | Golgi to endoplasmic reticulum retrotranslocase 5 | 2 | 2 | 2 | 36.5  | 5.41  | 75  | 2 |
| P51570     | Galactokinase 6                                   | 2 | 2 | 2 | 42.2  | 6.46  | 68  | 2 |
| B2RDJ6     | Probable cytosolic phospholipase C 12             | 3 | 3 | 3 | 37.8  | 4.97  | 57  | 3 |
| MOQYNO     | Myeloid-derived protein 7                         | 1 | 2 | 1 | 20.4  | 5.3   | 28  | 1 |
| P07686     | Beta-hexosaminidase 3                             | 1 | 1 | 1 | 63.1  | 6.76  | 42  | 1 |
| Q8NHH9     | Atlantakin-2                                      | 2 | 2 | 2 | 66.2  | 5.48  | 58  | 2 |
| Q13724     | Mannosyl-oligosaccharide 6-phosphotransferase 2   | 2 | 2 | 2 | 91.9  | 8.9   | 74  | 2 |
| Q14807     | Kinesin-like protein 6                            | 3 | 3 | 3 | 73.2  | 9.45  | 39  | 3 |
| AOA0S2Z556 | Polyglutamine 7                                   | 2 | 2 | 2 | 32.2  | 6.34  | 78  | 2 |
| E5RFR7     | Tumor protein 36                                  | 2 | 2 | 2 | 12.4  | 4.68  | 27  | 2 |
| AOA024R5X7 | ClpX casein phosphatase 7                         | 3 | 4 | 3 | 69.2  | 7.58  | 38  | 3 |
| E9PLN8     | Uncharacterized protein 7                         | 1 | 1 | 1 | 17.9  | 8.62  | 70  | 1 |
| O60343     | TBC1 domain 2                                     | 2 | 2 | 2 | 146.5 | 7.01  | 56  | 2 |
| Q8WUA2     | Peptidyl-prolyl isomerase 5                       | 2 | 2 | 2 | 57.2  | 5.92  | 41  | 2 |
| Q14247     | Src substrate 9                                   | 2 | 2 | 2 | 61.5  | 5.4   | 37  | 2 |
| F1JVV5     | EWSR1/ATF1 8                                      | 3 | 3 | 3 | 57    | 8.57  | 52  | 3 |
| Q13641     | Trophoblast protein 9                             | 3 | 3 | 3 | 46    | 6.83  | 41  | 3 |
| O43920     | NADH dehydrogenase 18                             | 2 | 2 | 2 | 12.5  | 9.14  | 79  | 2 |
| Q13131     | 5'-AMP-activated protein kinase 6                 | 2 | 2 | 2 | 64    | 8.12  | 0   | 2 |
| D3DUP1     | WNK lysine kinase 1                               | 3 | 3 | 3 | 250.6 | 6.34  | 36  | 3 |
| J3QRU1     | Tyrosine phosphatase 1                            | 2 | 3 | 1 | 61.3  | 6.57  | 88  | 2 |
| AOA0S2Z5E9 | CWF19-like protein 6                              | 2 | 2 | 2 | 60.6  | 7.24  | 50  | 2 |
| Q9Y5P6     | Mannose-1-phosphate 5-epimerase 5                 | 1 | 1 | 1 | 39.8  | 6.61  | 68  | 1 |
| B4E263     | cDNA FLJ53E3                                      | 3 | 3 | 1 | 127.5 | 6.52  | 41  | 3 |
| Q9BUL8     | Programmed cell death 20                          | 2 | 2 | 2 | 24.7  | 8.19  | 0   | 2 |
| Q9H993     | Protein-glucosyltransferase 3                     | 1 | 2 | 1 | 51.1  | 5.76  | 35  | 1 |
| Q4LE43     | Phosphoinositide 3-kinase 1                       | 2 | 2 | 2 | 161.2 | 7.18  | 84  | 2 |
| AOA0G2JPP5 | Protein sci2                                      | 3 | 3 | 3 | 177.6 | 5.1   | 41  | 3 |
| Q92615     | La-related protein 6                              | 4 | 4 | 2 | 80.5  | 6.92  | 45  | 4 |
| B4E0X1     | Beta-2-microglobulin 26                           | 2 | 3 | 2 | 13.9  | 7.44  | 50  | 2 |
| O75691     | Small subunit 1                                   | 2 | 2 | 2 | 318.2 | 7.39  | 49  | 2 |
| HOYC33     | La-related protein 18                             | 3 | 3 | 1 | 20.9  | 9.67  | 33  | 3 |
| O60826     | Coiled-coil protein 7                             | 3 | 3 | 3 | 70.7  | 6.74  | 32  | 3 |
| Q96EY7     | Pentatricopeptide repeat 4                        | 2 | 2 | 2 | 78.5  | 6.42  | 54  | 2 |
| Q6L8Q7     | 2',5'-bisphosphate-dependent protein kinase 6     | 3 | 3 | 3 | 67.3  | 6.57  | 43  | 3 |
| Q8NC56     | LEM domain protein 4                              | 2 | 2 | 2 | 56.9  | 9     | 54  | 2 |
| Q7L5L3     | Glycerophosphorylcholine transferase 4            | 1 | 1 | 1 | 36.6  | 7.97  | 85  | 1 |
| Q8N5K1     | CDGSH iron-binding protein 19                     | 2 | 2 | 2 | 15.3  | 9.61  | 72  | 2 |
| Q53G19     | Mitochondrial protein 21                          | 2 | 2 | 2 | 20.6  | 9.91  | 0   | 2 |
| AOA024QZC1 | CD2 antigen 8                                     | 2 | 2 | 2 | 37.6  | 4.61  | 59  | 2 |
| AOA024R1U2 | PHD finger 18                                     | 2 | 2 | 2 | 12.4  | 8.41  | 59  | 2 |
| A8K4B4     | cDNA FLJ78E5                                      | 2 | 2 | 2 | 49.4  | 9.89  | 76  | 2 |
| AOA024ROV4 | Vasodilator-stimulated phosphatase 9              | 3 | 3 | 3 | 39.8  | 8.94  | 54  | 3 |
| P06132     | Uroporphyrin III decarboxylase 4                  | 1 | 1 | 1 | 40.8  | 6.14  | 63  | 1 |
| Q96I25     | Splicing factor 9                                 | 3 | 3 | 2 | 44.9  | 5.97  | 34  | 3 |
| Q9BYD1     | 39S ribosomal protein 19                          | 3 | 3 | 3 | 20.7  | 9.16  | 60  | 3 |
| AOA087X2D8 | C-Jun amino-terminal kinase 4                     | 4 | 4 | 4 | 145.1 | 5.17  | 46  | 4 |
| AOA0AOMRK6 | Metaxin 1, 12                                     | 4 | 4 | 4 | 51.4  | 9.79  | 48  | 4 |

|            |                        |   |   |   |       |       |    |   |
|------------|------------------------|---|---|---|-------|-------|----|---|
| Q7Z422     | SUZ domain-13.8157895  | 1 | 2 | 1 | 17    | 8.95  | 0  | 1 |
| K7EIK7     | Echinoderm 5.17464424  | 3 | 3 | 3 | 84.7  | 6.87  | 24 | 3 |
| O60936     | Nucleolar p19.13461538 | 1 | 1 | 1 | 22.6  | 4.18  | 45 | 1 |
| V9HW91     | Epididymis 12.3188406  | 2 | 2 | 2 | 30.6  | 7.21  | 50 | 2 |
| P17535     | Transcripti4.32276657  | 1 | 1 | 1 | 35.2  | 7.37  | 75 | 1 |
| P49916     | DNA ligase 3.76610505  | 3 | 3 | 3 | 112.8 | 9.01  | 67 | 3 |
| E9PAU2     | Ribonucleoq 4.4973545  | 2 | 2 | 2 | 79.5  | 8.92  | 42 | 2 |
| J3KNL6     | Protein trz2.12134069  | 2 | 2 | 2 | 251.7 | 5.8   | 28 | 2 |
| Q9Y6M5     | Zinc transf4.53648915  | 2 | 2 | 2 | 55.3  | 6.48  | 43 | 2 |
| P45973     | Chromobox p13.0890052  | 2 | 3 | 2 | 22.2  | 5.86  | 39 | 2 |
| Q8N766     | ER membran1.30916415   | 1 | 1 | 1 | 111.7 | 7.66  | 85 | 1 |
| 075152     | Zinc finger3.82716049  | 3 | 3 | 3 | 89.1  | 8.37  | 43 | 3 |
| Q12802     | A-kinase ar1.91965873  | 3 | 3 | 3 | 307.4 | 5.24  | 30 | 3 |
| Q9Y2S7     | Polymerase 4.34782609  | 1 | 1 | 1 | 42    | 8.63  | 72 | 1 |
| Q8NHQ9     | ATP-depende2.83333333  | 1 | 1 | 1 | 68.5  | 9.25  | 72 | 1 |
| Q9Y448     | Small kinet 8.5443038  | 2 | 2 | 2 | 35.4  | 6.3   | 35 | 2 |
| Q99543     | DnaJ homolc5.15297907  | 3 | 3 | 3 | 72    | 8.7   | 53 | 3 |
| AOA024QYY3 | Phosphoribc5.96205962  | 2 | 3 | 1 | 40.9  | 7.44  | 71 | 2 |
| AOA0S2Z5J4 | Adaptor-rel3.01645338  | 3 | 3 | 3 | 121.2 | 6.04  | 48 | 3 |
| 000217     | NADH dehyd12.8571429   | 2 | 2 | 2 | 23.7  | 6.34  | 56 | 2 |
| 075909     | Cyclin-K 054.65517241  | 2 | 2 | 2 | 64.2  | 8.41  | 48 | 2 |
| J9JIE6     | Calcium loc9.20502092  | 2 | 2 | 2 | 27.1  | 10.26 | 59 | 2 |
| P49589     | Cysteine--t 5.0802139  | 3 | 3 | 3 | 85.4  | 6.76  | 62 | 3 |
| AOA024R6A3 | Presenilin 4.06852248  | 1 | 2 | 1 | 52.6  | 5.31  | 47 | 1 |
| P63218     | Guanine nuc32.3529412  | 2 | 2 | 2 | 7.3   | 9.85  | 69 | 2 |
| Q15043     | Zinc transf2.64227642  | 1 | 1 | 1 | 54.2  | 5.33  | 74 | 1 |
| J3KNQ4     | Alpha-parvi 7.2815534  | 2 | 2 | 2 | 46.6  | 8.4   | 53 | 2 |
| Q69YJ7     | Putative ur2.09643606  | 2 | 2 | 2 | 100.1 | 8.91  | 45 | 2 |
| J3KQL8     | Apolipoprot4.89977728  | 2 | 2 | 2 | 48.9  | 6     | 58 | 2 |
| 075964     | ATP synthas 27.184466  | 2 | 4 | 2 | 11.4  | 9.64  | 59 | 2 |
| AOA0S2Z3G3 | Solute carri8.10810811 | 2 | 2 | 2 | 32.1  | 9.35  | 62 | 2 |
| D6REX3     | Protein tr1.75859313   | 2 | 2 | 2 | 136.1 | 6.98  | 66 | 2 |
| Q9BWE0     | Replicatio2.64550265   | 1 | 1 | 1 | 63.5  | 9.98  | 65 | 1 |
| Q9UN37     | Vacuolar pi6.40732265  | 2 | 2 | 1 | 48.9  | 7.8   | 52 | 2 |
| B2RAH5     | Protein phc1.84466019  | 2 | 2 | 2 | 115.3 | 5.43  | 75 | 2 |
| Q9H4A6     | Golgi phosf5.03355705  | 1 | 1 | 1 | 33.8  | 6.44  | 77 | 1 |
| Q02818     | Nucleobindi5.20607375  | 2 | 2 | 2 | 53.8  | 5.25  | 57 | 2 |
| H6QX63     | Hepatocellu 6.8852459  | 2 | 2 | 2 | 34.8  | 10.78 | 65 | 2 |
| J3QR44     | Cyclin-depe 5.1572327  | 4 | 4 | 4 | 92.6  | 5.54  | 59 | 4 |
| Q8WUX1     | Sodium-couf9.95762712  | 3 | 3 | 3 | 51.4  | 8.21  | 39 | 3 |
| P16278     | Beta-galact3.24963072  | 2 | 2 | 2 | 76    | 6.57  | 46 | 2 |
| X5D299     | Aldehyde de5.10948905  | 2 | 2 | 2 | 58.6  | 8.09  | 63 | 2 |
| P32929     | Cystathioni6.66666667  | 2 | 2 | 2 | 44.5  | 6.7   | 37 | 2 |
| A8MYK1     | 39S riboson7.85340314  | 1 | 1 | 1 | 21.8  | 11.62 | 67 | 1 |
| Q9BXW7     | Cat eye syr12.0567376  | 3 | 3 | 3 | 46.3  | 8.13  | 46 | 3 |
| P13984     | General trz9.23694779  | 2 | 2 | 2 | 28.4  | 9.23  | 45 | 2 |
| Q8N5M9     | Protein jag6.55737705  | 1 | 1 | 1 | 21.1  | 9.73  | 81 | 1 |
| Q6MZT3     | Putative ur8.42824601  | 2 | 2 | 2 | 48.5  | 8.92  | 61 | 2 |
| Q8N4V1     | Membrane mc26.7175573  | 2 | 2 | 2 | 14.7  | 9.16  | 49 | 2 |
| Q5VT66     | Mitochondri4.45103858  | 1 | 1 | 1 | 37.5  | 8.88  | 65 | 1 |
| Q59GR1     | Niemann-Pic2.24980605  | 2 | 2 | 2 | 143.1 | 5.45  | 60 | 2 |
| Q92990     | Glomulin 05 3.7037037  | 2 | 2 | 2 | 68.2  | 5.33  | 48 | 2 |
| AOA0KOK1L8 | Epididymis 12.8514056  | 3 | 3 | 3 | 28.7  | 6.02  | 47 | 3 |
| 000483     | Cytochrome 22.2222222  | 2 | 2 | 2 | 9.4   | 9.38  | 69 | 2 |
| 075323     | Protein Nip6.64335664  | 2 | 2 | 2 | 33.7  | 9.36  | 79 | 2 |
| Q92878     | DNA repair 3.27743902  | 3 | 3 | 3 | 153.8 | 6.89  | 39 | 3 |
| Q71RC2     | La-related 6.62983425  | 4 | 4 | 2 | 80.5  | 6.61  | 44 | 4 |
| Q9HDC9     | Adipocyte p7.21153846  | 2 | 2 | 2 | 46.5  | 6.16  | 35 | 2 |
| P61077     | Ubiquitin-c6.80272109  | 2 | 3 | 2 | 16.7  | 7.8   | 65 | 2 |
| AOA0S2Z3D0 | Carbonic ar6.53594771  | 2 | 2 | 2 | 49.7  | 4.72  | 34 | 2 |
| F5GXJ1     | NADH dehyd7.62711864   | 2 | 2 | 2 | 25.4  | 9.89  | 67 | 2 |
| 015460     | Prolyl 4-hy4.48598131  | 2 | 2 | 2 | 60.9  | 5.71  | 71 | 2 |
| AOA140VJJ4 | Testicular 18.0327869  | 2 | 2 | 2 | 13.3  | 8.35  | 62 | 2 |
| P11234     | Ras-relatec 13.592233  | 2 | 3 | 1 | 23.4  | 6.62  | 57 | 2 |
| X5D2I6     | G protein-c5.47045952  | 2 | 2 | 2 | 53.1  | 9.28  | 60 | 2 |
| Q9BUR5     | MICOS comp123.2323232  | 3 | 3 | 3 | 22.3  | 9.13  | 40 | 3 |
| P36507     | Dual specif 8.75       | 3 | 3 | 1 | 44.4  | 6.55  | 53 | 3 |
| B2R6S5     | UMP-CMP kir16.66666667 | 3 | 4 | 3 | 25.8  | 7.97  | 66 | 3 |
| J3KR97     | Tubulin-spe3.90243902  | 3 | 3 | 3 | 136.5 | 6.34  | 32 | 3 |
| P19623     | Spermidine 7.28476821  | 2 | 2 | 2 | 33.8  | 5.49  | 50 | 2 |
| Q9Y5J9     | Mitochondri15.6626506  | 1 | 1 | 1 | 9.3   | 5.12  | 59 | 1 |
| Q9Y4C8     | Probable R1.66666667   | 1 | 1 | 1 | 107.3 | 6.54  | 70 | 1 |
| V9HWA9     | Epididymis 1.80396873  | 2 | 2 | 2 | 187   | 6.4   | 51 | 2 |

|            |                        |   |   |   |       |       |    |   |
|------------|------------------------|---|---|---|-------|-------|----|---|
| Q9Y4W2     | Ribosomal t4.49591281  | 2 | 2 | 2 | 83    | 4.73  | 39 | 2 |
| A0A075B6F9 | Nitric oxid12.8289474  | 3 | 3 | 3 | 33.4  | 8.72  | 67 | 3 |
| O43765     | Small glutε 8.9456869  | 2 | 2 | 2 | 34    | 4.87  | 58 | 2 |
| E7EQZ4     | Survival mc10.5442177  | 2 | 2 | 2 | 31.7  | 5.71  | 46 | 2 |
| Q8NCA5     | Protein FAN2.89017341  | 1 | 1 | 1 | 55.4  | 9.03  | 65 | 1 |
| Q9H223     | EH domain-c12.0147874  | 4 | 4 | 3 | 61.1  | 6.76  | 54 | 4 |
| P08651     | Nuclear fac2.75590551  | 1 | 1 | 1 | 55.6  | 8.38  | 67 | 1 |
| Q9NQG5     | Regulation 4.90797546  | 1 | 1 | 1 | 36.9  | 5.97  | 66 | 1 |
| Q9Y6G9     | Cytoplasmic7.07456979  | 3 | 3 | 2 | 56.5  | 6.42  | 26 | 3 |
| A8K3B6     | Tyrosine-pi4.88888889  | 2 | 2 | 2 | 50.7  | 7.06  | 50 | 2 |
| O00186     | Syntaxin-bi6.08108108  | 3 | 3 | 3 | 67.7  | 7.8   | 37 | 3 |
| A0A0A0MR51 | Fatty acid 3.99201597  | 2 | 2 | 2 | 57.8  | 9.48  | 45 | 2 |
| B4DNC0     | cDNA FLJ6115.10948905  | 1 | 1 | 1 | 30.6  | 8.37  | 80 | 1 |
| Q9H8Y5     | Ankyrin re1 2.0661157  | 1 | 1 | 1 | 80.9  | 8.41  | 66 | 1 |
| F8WBV6     | Small EDRK 10.1851852  | 2 | 2 | 2 | 11.9  | 10.84 | 56 | 2 |
| A0A024R5Q8 | CTD (Carbo) 2.5751073  | 1 | 1 | 1 | 53    | 6.4   | 61 | 1 |
| P83111     | Serine betε 2.01096892 | 2 | 2 | 2 | 60.7  | 8.53  | 51 | 2 |
| MOR1T5     | Charged mul7.92951542  | 1 | 1 | 1 | 24.9  | 5.27  | 67 | 1 |
| Q8IWA0     | WD repeat-c3.61445783  | 2 | 2 | 2 | 94.4  | 5.96  | 43 | 2 |
| Q53EL1     | Protein KI/2.40549828  | 2 | 2 | 2 | 134.8 | 7.06  | 43 | 2 |
| Q9H5Q4     | Dimethylade 4.7979798  | 2 | 2 | 2 | 45.3  | 9.19  | 66 | 2 |
| Q96JM3     | Chromosome 4.06403941  | 2 | 2 | 2 | 89    | 8.44  | 29 | 2 |
| A0A140VJZ4 | Ubiquitin c5.65217391  | 1 | 1 | 1 | 26.2  | 4.92  | 58 | 1 |
| HOYL70     | Transducin-4.47570332  | 3 | 3 | 3 | 84.4  | 7.27  | 41 | 3 |
| J3KNN5     | Probable A1 4.84375    | 2 | 2 | 2 | 71.6  | 7.46  | 31 | 2 |
| Q9Y4E8     | Ubiquitin c2.14067278  | 2 | 2 | 1 | 112.3 | 5.22  | 59 | 2 |
| A0A024R880 | Cyclin-depe5.91397849  | 3 | 4 | 2 | 42.8  | 8.79  | 63 | 3 |
| B7ZKQ8     | PODXL prote9.28571429  | 3 | 5 | 3 | 58.8  | 5.49  | 35 | 3 |
| DOEKE5     | Peptidylprc7.41839763  | 2 | 2 | 2 | 38.5  | 6.84  | 43 | 2 |
| Q5JRX3     | Presequence2.98939248  | 2 | 2 | 2 | 117.3 | 6.92  | 35 | 2 |
| Q96CM8     | Acyl-CoA sy4.06504065  | 2 | 2 | 2 | 68.1  | 7.55  | 43 | 2 |
| B4DTK7     | cDNA FLJ61ε3.99181167  | 2 | 2 | 2 | 108.9 | 8.44  | 0  | 2 |
| P53611     | Geranylgerε9.66767372  | 3 | 3 | 3 | 36.9  | 5.03  | 43 | 3 |
| A0A024R8D4 | Mitochondri5.95611285  | 2 | 2 | 2 | 35.5  | 8.94  | 39 | 2 |
| Q9Y3D9     | 28S riboson24.2105263  | 2 | 4 | 2 | 21.8  | 8.9   | 50 | 2 |
| Q9Y237     | Peptidyl-pi10.6870229  | 1 | 1 | 1 | 13.8  | 9.77  | 58 | 1 |
| O43491     | Band 4.1-li 3.9800995  | 2 | 2 | 2 | 112.5 | 5.44  | 0  | 2 |
| P78346     | Ribonucleaε9.32835821  | 2 | 2 | 2 | 29.3  | 8.91  | 55 | 2 |
| O43681     | ATPase ASN/8.62068966  | 2 | 2 | 2 | 38.8  | 4.91  | 47 | 2 |
| Q4G0J3     | La-related 4.98281787  | 2 | 2 | 2 | 66.9  | 9.55  | 43 | 2 |
| P52434     | DNA-directε12.66666667 | 2 | 2 | 2 | 17.1  | 4.68  | 65 | 2 |
| MOQZR4     | Rho guanine2.37603306  | 2 | 2 | 2 | 108.3 | 6.15  | 42 | 2 |
| Q8IURO     | Traffickingε9.57446809 | 2 | 2 | 2 | 20.8  | 9.66  | 54 | 2 |
| Q9UKV8     | Protein arε 3.9580908  | 3 | 3 | 3 | 97.1  | 9.19  | 32 | 3 |
| A6NDU8     | UPF0600 prc7.82312925  | 2 | 2 | 2 | 33.6  | 5.26  | 59 | 2 |
| Q4LE38     | IKBKAP vari2.45901639  | 2 | 2 | 2 | 151.4 | 6     | 52 | 2 |
| Q16831     | Uridine phc6.12903226  | 1 | 1 | 1 | 33.9  | 7.88  | 43 | 1 |
| Q9Y679     | Ancient ubi7.35294118  | 2 | 2 | 2 | 53    | 8.09  | 60 | 2 |
| Q9UI26     | Importin-112.97435897  | 2 | 2 | 2 | 112.5 | 5.25  | 56 | 2 |
| P05026     | Sodium/potε7.92079208  | 2 | 2 | 2 | 35    | 8.53  | 36 | 2 |
| A0A087WWM1 | Mucin-1 OS:0.87163233  | 1 | 1 | 1 | 122.9 | 7.56  | 67 | 1 |
| O43795     | Unconventic3.78521127  | 3 | 3 | 3 | 131.9 | 9.38  | 29 | 3 |
| Q9NX58     | Cell growt6.59630607   | 2 | 2 | 2 | 43.6  | 9.54  | 59 | 2 |
| P55210     | Caspase-7 (16.5016502  | 2 | 2 | 2 | 34.3  | 6.07  | 32 | 2 |
| Q9NYB0     | Telomeric r7.26817043  | 1 | 1 | 1 | 44.2  | 4.73  | 0  | 1 |
| Q9NRK6     | ATP-binding2.16802168  | 1 | 1 | 1 | 79.1  | 9.85  | 65 | 1 |
| Q5J TZ9    | Alanine--tf2.43654822  | 2 | 2 | 2 | 107.3 | 6.27  | 58 | 2 |
| B3KSH1     | Eukaryotic 11.5591398  | 3 | 3 | 3 | 39.1  | 5.45  | 20 | 3 |
| P06396     | Gelsolin OS5.24296675  | 3 | 3 | 3 | 85.6  | 6.28  | 53 | 3 |
| Q92481     | Transcripti6.52173913  | 2 | 2 | 2 | 50.4  | 8.24  | 45 | 2 |
| S4R369     | 39S riboson 6.6252588  | 2 | 2 | 2 | 54.9  | 9.42  | 38 | 2 |
| Q93008     | Probable ut0.97276265  | 2 | 2 | 2 | 292.1 | 5.8   | 35 | 2 |
| A8K5D4     | Myelin prot8.55018587  | 2 | 3 | 2 | 29.1  | 8.72  | 43 | 2 |
| A4D0V4     | Capping prc8.39160839  | 2 | 2 | 1 | 32.9  | 5.85  | 69 | 2 |
| Q59EN5     | Prosaposin 6.41509434  | 3 | 3 | 3 | 58.7  | 5.1   | 32 | 3 |
| Q9NPJ3     | Acyl-coenzε8.57142857  | 1 | 1 | 1 | 15    | 9.14  | 79 | 1 |
| Q9NTM9     | Copper home9.89010989  | 2 | 2 | 2 | 29.3  | 8.18  | 0  | 2 |
| B4DLM8     | cDNA FLJ5612.92056075  | 2 | 2 | 2 | 95    | 6.58  | 32 | 2 |
| B2RE40     | cDNA, FLJ9ε14.1843972  | 2 | 2 | 2 | 31.5  | 4.59  | 0  | 2 |
| Q96ER9     | Coiled-coil4.37956204  | 2 | 2 | 2 | 45.8  | 8.19  | 61 | 2 |
| Q96KA5     | Cleft lip ε 6.3197026  | 2 | 2 | 2 | 62.2  | 8.56  | 42 | 2 |
| P11717     | Cation-indε0.84303493  | 2 | 2 | 2 | 274.2 | 5.94  | 38 | 2 |
| A0A0S2Z5L1 | ATP-binding2.53878702  | 1 | 1 | 1 | 79.7  | 6.34  | 74 | 1 |

|            |                     |             |   |   |   |       |       |    |   |
|------------|---------------------|-------------|---|---|---|-------|-------|----|---|
| Q9COC2     | 182 kDa tar         | 2.7183343   | 2 | 2 | 2 | 181.7 | 4.86  | 32 | 2 |
| Q96FZ2     | Embryonic           | 6.77966102  | 2 | 2 | 2 | 40.5  | 8.15  | 69 | 2 |
| Q3SXM5     | Inactive h          | 6.06060606  | 2 | 2 | 2 | 37    | 8.72  | 54 | 2 |
| A8K7F7     | cDNA FLJ76          | 2.49042146  | 1 | 1 | 1 | 58.5  | 6.55  | 74 | 1 |
| Q86T03     | Type 1 pho          | 7.94223827  | 2 | 2 | 2 | 29.5  | 8.91  | 57 | 2 |
| Q9GZR2     | RNA exonuc          | 19.00473934 | 3 | 3 | 3 | 46.6  | 9.77  | 22 | 3 |
| X5CMJ9     | Proteasome          | 5.07246377  | 1 | 1 | 1 | 30.3  | 7.43  | 45 | 1 |
| Q5T1Z8     | Pumilio hon         | 3.83986928  | 3 | 3 | 3 | 130   | 6.9   | 47 | 3 |
| Q9H9P8     | L-2-hydroxy         | 2.59179266  | 1 | 1 | 1 | 50.3  | 8.15  | 62 | 1 |
| Q8NAV1     | Pre-mRNA-s          | 3.84615385  | 1 | 2 | 1 | 37.5  | 9.96  | 81 | 1 |
| AOA024QYZO | Sec61 gamm          | 29.4117647  | 2 | 3 | 2 | 7.7   | 9.99  | 98 | 2 |
| Q6FIC5     | Chloride ir         | 11.8577075  | 2 | 2 | 2 | 28.8  | 5.59  | 40 | 2 |
| Q15813     | Tubulin-spe         | 2.08728653  | 1 | 1 | 1 | 59.3  | 6.76  | 61 | 1 |
| Q13206     | Probable A          | 11.48571429 | 1 | 1 | 1 | 100.8 | 8.63  | 71 | 1 |
| Q9NPD8     | Ubiquitin-c         | 8.62944162  | 1 | 1 | 1 | 22.5  | 7.99  | 64 | 1 |
| Q5HYL4     | Putative ur         | 5.50314465  | 2 | 2 | 2 | 69.4  | 7.28  | 34 | 2 |
| AOA024RD36 | Ribosomal           | 11.7647059  | 2 | 2 | 2 | 29.7  | 10.52 | 65 | 2 |
| Q9BSC4     | Nucleolar           | 4.36046512  | 3 | 3 | 3 | 80.3  | 8.46  | 46 | 3 |
| F6S8M0     | N-acetylgl          | 3.59589041  | 2 | 2 | 2 | 65.7  | 7.97  | 57 | 2 |
| Q75817     | Ribonuclea          | 10.7142857  | 1 | 1 | 1 | 15.6  | 8.94  | 58 | 1 |
| Q5VV42     | Threonylca          | 4.49050086  | 2 | 2 | 2 | 65.1  | 7.46  | 37 | 2 |
| Q9BQ75     | Protein CM          | 6.4516129   | 2 | 2 | 2 | 31.9  | 9.19  | 64 | 2 |
| Q53G26     | DnaJ (Hsp4          | 5.83333333  | 2 | 2 | 2 | 52.5  | 9.26  | 41 | 2 |
| Q6FHF7     | RABGGTA pr          | 5.82010582  | 2 | 2 | 2 | 65    | 5.74  | 22 | 2 |
| P57740     | Nuclear poi         | 3.02702703  | 2 | 2 | 2 | 106.3 | 5.43  | 52 | 2 |
| P50897     | Palmitoyl- $\gamma$ | 4.90196078  | 1 | 1 | 1 | 34.2  | 6.52  | 53 | 1 |
| AOA087X2H1 | E3 ubiquiti         | 1.03289977  | 2 | 2 | 2 | 289.5 | 5.43  | 31 | 2 |
| Q9BVL2     | Nucleoporin         | 3.33889816  | 2 | 2 | 2 | 60.9  | 9.33  | 70 | 2 |
| P54105     | Methylsoma          | 18.5654008  | 2 | 2 | 2 | 26.2  | 4.11  | 20 | 2 |
| F5H619     | HEAT repeat         | 1.4173998   | 3 | 3 | 3 | 222.6 | 6.55  | 33 | 3 |
| Q00233     | 26S protea          | 13.9013453  | 3 | 3 | 3 | 24.7  | 6.95  | 45 | 3 |
| Q96LD4     | Tripartite          | 2.35109718  | 1 | 1 | 1 | 69.5  | 6.44  | 70 | 1 |
| Q9Y3B9     | RRP15-like          | 7.09219858  | 2 | 2 | 2 | 31.5  | 5.52  | 53 | 2 |
| P85037     | Forkhead b          | 3.54706685  | 3 | 3 | 3 | 75.4  | 9.32  | 48 | 3 |
| P51553     | Isocitrate          | 2.79898219  | 1 | 1 | 1 | 42.8  | 8.5   | 47 | 1 |
| Q9COC9     | (E3-indepe          | 2.3993808   | 2 | 3 | 2 | 141.2 | 5.12  | 39 | 2 |
| Q9HCU5     | Prolactin           | 3.83693046  | 1 | 2 | 1 | 45.4  | 7.88  | 0  | 1 |
| A8MUH2     | ATP syntha          | 19.3277311  | 1 | 1 | 1 | 13.9  | 9.41  | 0  | 1 |
| P48163     | NADP-depend         | 7.69230769  | 3 | 4 | 3 | 64.1  | 6.13  | 15 | 3 |
| Q9NP77     | RNA polymer         | 6.18556701  | 1 | 1 | 1 | 22.6  | 5.33  | 59 | 1 |
| H7C1E4     | AP-1 compl          | 9.94764398  | 2 | 2 | 2 | 22.2  | 9.16  | 57 | 2 |
| Q96I99     | Succinate--         | 2.31481481  | 1 | 1 | 1 | 46.5  | 6.39  | 81 | 1 |
| Q96KG9     | N-terminal          | 4.82673267  | 2 | 2 | 2 | 89.6  | 6.3   | 0  | 2 |
| Q8WUK0     | Phosphatid          | 12.4378109  | 2 | 2 | 2 | 22.8  | 9.77  | 45 | 2 |
| Q9H3S7     | Tyrosine-p          | 2.200489    | 2 | 2 | 2 | 178.9 | 6.92  | 44 | 2 |
| Q6NUM9     | All-trans- $\gamma$ | 3.44262295  | 2 | 2 | 2 | 66.8  | 8.28  | 33 | 2 |
| AOA024R6R1 | SHC SH2-dom         | 5.6547619   | 2 | 2 | 2 | 75.6  | 4.75  | 42 | 2 |
| B4E3I3     | cDNA FLJ59          | 8.25396825  | 2 | 2 | 2 | 35.4  | 5.72  | 41 | 2 |
| E7EQR8     | Protein YII         | 7.58426966  | 1 | 1 | 1 | 38.9  | 5.6   | 53 | 1 |
| Q9UDW1     | Cytochrome          | 26.984127   | 1 | 1 | 1 | 7.3   | 9.47  | 61 | 1 |
| Q9H814     | Phosphoryl          | 4.06091371  | 1 | 1 | 1 | 44.4  | 5.4   | 54 | 1 |
| F5GYQ1     | V-type prot         | 7.39795918  | 2 | 3 | 2 | 44.6  | 5.14  | 23 | 2 |
| AOA024R5S9 | Neural cell         | 13.44444444 | 2 | 2 | 2 | 104.1 | 5.92  | 39 | 2 |
| Q9H2J4     | Phosducin-          | 16.27615063 | 1 | 1 | 1 | 27.6  | 4.84  | 56 | 1 |
| X6RAY8     | 39S riboso          | 5.32212885  | 1 | 2 | 1 | 39.6  | 10.59 | 56 | 1 |
| Q07960     | Rho GTPase-         | 6.37813212  | 2 | 3 | 2 | 50.4  | 6.29  | 55 | 2 |
| B4DZK0     | Cysteine p          | 2.35294118  | 1 | 1 | 1 | 57.3  | 8.53  | 63 | 1 |
| Q60701     | UDP-glucose         | 6.68016194  | 2 | 2 | 2 | 55    | 7.12  | 35 | 2 |
| X6R5Z6     | Cytochrome          | 18.7096774  | 2 | 3 | 2 | 18    | 10.1  | 41 | 2 |
| B3KPZ2     | cDNA FLJ32          | 9.81432361  | 2 | 2 | 2 | 41.9  | 9.16  | 35 | 2 |
| HOYMD1     | Low-density         | 1.37130802  | 1 | 1 | 1 | 104.7 | 5.5   | 67 | 1 |
| Q9BRR6     | ADP-depend          | 6.23742455  | 2 | 2 | 2 | 54.1  | 6.2   | 58 | 2 |
| Q86UA3     | Chromosome          | 8.5106383   | 3 | 3 | 3 | 42.5  | 6.84  | 47 | 3 |
| AOA0S2Z569 | DAZ associ          | 8.84520885  | 2 | 2 | 1 | 43.4  | 8.56  | 19 | 2 |
| Q5JXB2     | Putative ut         | 13.7254902  | 2 | 2 | 2 | 17.4  | 5.92  | 57 | 2 |
| Q9COE8     | Protein lur         | 3.03738318  | 1 | 1 | 1 | 47.7  | 5.11  | 60 | 1 |
| Q14764     | Major vault         | 13.13549832 | 3 | 3 | 3 | 99.3  | 5.48  | 45 | 3 |
| B2R7C7     | Alkaline p          | 5.79439252  | 2 | 2 | 2 | 57.8  | 6.29  | 0  | 2 |
| AOA087X0R6 | Sorting ne          | 11.627907   | 2 | 2 | 2 | 19.8  | 7.78  | 54 | 2 |
| Q9UGJ1     | Gamma-tubu          | 1.79910045  | 1 | 2 | 1 | 76    | 6.65  | 34 | 1 |
| Q86WA8     | Lon protea          | 2.9342723   | 2 | 2 | 2 | 94.6  | 7.3   | 33 | 2 |
| Q43493     | Trans-Golgi         | 5.20833333  | 2 | 2 | 2 | 51.1  | 5.73  | 35 | 2 |
| Q60825     | 6-phosphof          | 3.96039604  | 2 | 2 | 2 | 58.4  | 8.38  | 47 | 2 |



|            |             |             |   |   |   |       |       |    |   |
|------------|-------------|-------------|---|---|---|-------|-------|----|---|
| P10606     | Cytochrome  | 15.503876   | 2 | 3 | 2 | 13.7  | 8.81  | 52 | 2 |
| Q92536     | Y+L amino   | ε5.82524272 | 1 | 4 | 1 | 56.8  | 5.88  | 0  | 1 |
| P53582     | Methionine  | 2.84974093  | 1 | 1 | 1 | 43.2  | 7.17  | 64 | 1 |
| B2R713     | cDNA, FLJ9  | 8.32196453  | 2 | 2 | 2 | 81.7  | 7.97  | 31 | 2 |
| Q9UHD2     | Serine/thre | 2.4691358   | 1 | 1 | 1 | 83.6  | 6.79  | 58 | 1 |
| Q02241     | Kinesin-III | 2.29166667  | 2 | 2 | 2 | 110   | 8.51  | 52 | 2 |
| Q68E01     | Integrator  | 3.73921381  | 2 | 2 | 2 | 118   | 5.8   | 38 | 2 |
| Q8N335     | Glycerol-3- | 4.1880342   | 1 | 1 | 1 | 38.4  | 7.02  | 56 | 1 |
| Q9H7N4     | Splicing fa | 1.2195122   | 1 | 1 | 1 | 139.2 | 9.25  | 64 | 1 |
| P86790     | Vacuolar fu | 2.90456432  | 1 | 1 | 1 | 55.8  | 6.48  | 61 | 1 |
| Q6NSW5     | Putative pi | 5.32212885  | 1 | 1 | 1 | 40.5  | 6.54  | 38 | 1 |
| Q6IAA8     | Ragulator c | 8.07453416  | 1 | 1 | 1 | 17.7  | 5.15  | 47 | 1 |
| Q9UID3     | Vacuolar pi | 1.53452685  | 1 | 1 | 1 | 86    | 6.47  | 65 | 1 |
| P29508     | Serpin B3   | (5.64102564 | 2 | 2 | 2 | 44.5  | 6.81  | 46 | 2 |
| Q9BZX2     | Uridine-cyt | 10.3448276  | 2 | 2 | 2 | 29.3  | 6.7   | 36 | 2 |
| B3KWH9     | Elongation  | 6.35451505  | 2 | 2 | 2 | 35.3  | 9.41  | 44 | 2 |
| Q8TED1     | Probable gl | 10.0478469  | 2 | 2 | 2 | 23.9  | 9.35  | 54 | 2 |
| Q9NRF9     | DNA polyme  | 10.8843537  | 1 | 2 | 1 | 16.8  | 4.74  | 22 | 1 |
| Q15018     | BRISC compl | 7.46987952  | 3 | 3 | 3 | 46.9  | 6.21  | 38 | 3 |
| AOA024R608 | Ribosomal r | 37.7192982  | 1 | 1 | 1 | 11.5  | 4.32  | 37 | 1 |
| AOA0S2Z5H0 | Mitochondri | 5.20833333  | 1 | 1 | 1 | 21.4  | 9.1   | 56 | 1 |
| AOA0A0MRM8 | Unconventi  | 2.95291301  | 2 | 2 | 2 | 144.9 | 8.56  | 32 | 2 |
| V9HW44     | Epididymis  | 12.6637555  | 1 | 4 | 1 | 25.6  | 5.92  | 0  | 1 |
| P48681     | Nestin OS=f | 0.67859346  | 1 | 1 | 1 | 177.3 | 4.36  | 69 | 1 |
| Q9UHV9     | Prefoldin ε | 9.09090909  | 1 | 1 | 1 | 16.6  | 6.58  | 55 | 1 |
| P02671     | Fibrinogen  | 1.50115473  | 1 | 1 | 1 | 94.9  | 6.01  | 54 | 1 |
| B0S7P4     | cDNA, FLJ9  | 8.52713178  | 2 | 2 | 2 | 29.4  | 9.38  | 46 | 2 |
| B2R5R5     | cDNA, FLJ9  | 4.57142857  | 1 | 1 | 1 | 39.3  | 5.53  | 48 | 1 |
| Q5F1R6     | DnaJ homol  | 3.01318267  | 1 | 1 | 1 | 62    | 5.47  | 51 | 1 |
| A8K5R6     | Golgi SNAP  | 5.2         | 1 | 1 | 1 | 28.6  | 9.42  | 67 | 1 |
| A8K6M4     | cDNA FLJ7   | 510.7758621 | 1 | 1 | 1 | 26.7  | 8.79  | 38 | 1 |
| Q5R3I4     | Tetratricor | 5.75692964  | 2 | 2 | 2 | 52.8  | 5.99  | 35 | 2 |
| P06730     | Eukaryotic  | 26.2672811  | 3 | 3 | 3 | 25.1  | 6.15  | 37 | 3 |
| P33897     | ATP-binding | 4.29530201  | 2 | 2 | 2 | 82.9  | 8.95  | 44 | 2 |
| Q6FGU2     | DTYMK prote | 8.49056604  | 2 | 2 | 2 | 23.8  | 8.27  | 45 | 2 |
| Q9Y5L4     | Mitochondri | 18.9473684  | 2 | 2 | 2 | 10.5  | 8.18  | 25 | 2 |
| O15121     | Sphingolipi | 5.57275542  | 1 | 1 | 1 | 37.8  | 7.46  | 37 | 1 |
| P61009     | Signal pept | 11.6666667  | 2 | 2 | 2 | 20.3  | 8.62  | 39 | 2 |
| P30837     | Aldehyde de | 2.70793037  | 1 | 1 | 1 | 57.2  | 6.8   | 59 | 1 |
| P30044     | Peroxi-redo | 17.2897196  | 2 | 3 | 2 | 22.1  | 8.7   | 0  | 2 |
| Q9BVQ7     | Spermatoger | 1.85922975  | 1 | 1 | 1 | 80.7  | 8.09  | 44 | 1 |
| Q6UX04     | Peptidyl-p  | 3.1779661   | 1 | 1 | 1 | 53.8  | 5.8   | 55 | 1 |
| Q14554     | Protein di  | 6.93641618  | 3 | 3 | 3 | 59.6  | 7.91  | 24 | 3 |
| P29084     | Transcripti | 9.27835052  | 3 | 3 | 3 | 33    | 9.66  | 40 | 3 |
| I3L3T0     | HCG15164,   | i 15.862069 | 1 | 1 | 1 | 15.9  | 9.92  | 65 | 1 |
| O75179     | Ankyrin re  | 1.22935075  | 2 | 2 | 2 | 274.1 | 6.52  | 25 | 2 |
| O14548     | Cytochrome  | 28.9473684  | 1 | 1 | 1 | 12.6  | 9.42  | 0  | 1 |
| Q8N357     | Solute cari | 3.23450135  | 1 | 1 | 1 | 40.2  | 6.93  | 47 | 1 |
| Q15058     | Kinesin-III | 1.39563107  | 2 | 2 | 2 | 186.4 | 7.91  | 51 | 2 |
| Q9Y2R0     | Cytochrome  | 9.43396226  | 1 | 1 | 1 | 11.7  | 9.6   | 57 | 1 |
| P51003     | Poly(A) po  | 12.55033557 | 1 | 1 | 1 | 82.8  | 7.37  | 0  | 1 |
| Q9Y2Z0     | Protein SG  | 13.28767123 | 1 | 1 | 1 | 41    | 5.16  | 44 | 1 |
| Q9NZD8     | Maspardin   | (6.16883117 | 1 | 1 | 1 | 34.9  | 6.28  | 55 | 1 |
| Q9UJU6     | Drebrin-III | 2.55813953  | 1 | 1 | 1 | 48.2  | 5.05  | 57 | 1 |
| AOA024RACO | Leucine zip | 1.76579926  | 1 | 1 | 1 | 120.2 | 8.63  | 26 | 1 |
| Q8N3C0     | Activating  | 0.54495913  | 1 | 1 | 1 | 251.3 | 7.09  | 47 | 1 |
| P28072     | Proteasome  | 9.20502092  | 2 | 2 | 2 | 25.3  | 4.92  | 40 | 2 |
| Q6ZVX7     | F-box only  | 4           | 1 | 1 | 1 | 30.8  | 6.62  | 53 | 1 |
| Q92797     | Symplekin   | (4.94505495 | 3 | 3 | 3 | 141.1 | 6.13  | 0  | 3 |
| Q562T7     | Actin-like  | 29.1262136  | 1 | 1 | 1 | 11.4  | 6.67  | 0  | 1 |
| P56937     | 3-keto-ster | 3.51906158  | 1 | 1 | 1 | 38.2  | 8.1   | 66 | 1 |
| P49593     | Protein ph  | 2.20264317  | 1 | 1 | 1 | 49.8  | 5.1   | 60 | 1 |
| Q8WXA9     | Splicing rc | 2.75590551  | 1 | 1 | 1 | 59.3  | 10.39 | 0  | 1 |
| AOA0A0MSE2 | Hydroxyacy  | 14.61538462 | 2 | 2 | 2 | 42.1  | 9.26  | 60 | 2 |
| B4DEF8     | cDNA FLJ6   | 117.325228  | 3 | 3 | 3 | 37.8  | 9.13  | 0  | 3 |
| Q9H2M9     | Rab3 GTPase | 1.29217516  | 2 | 2 | 2 | 155.9 | 5.62  | 54 | 2 |
| Q14241     | Elongin-A   | (2.00501253 | 1 | 1 | 1 | 89.9  | 9.57  | 43 | 1 |
| Q9BRX8     | Redox-regu  | 14.4104803  | 3 | 3 | 3 | 25.7  | 8.84  | 0  | 3 |
| P43353     | Aldehyde de | 4.91452991  | 2 | 2 | 1 | 51.8  | 7.62  | 35 | 2 |
| J3QQJ0     | SAP30-bind  | 4.61538462  | 1 | 1 | 1 | 35.9  | 4.98  | 44 | 1 |
| Q7GXZ5     | NADH-ubiqui | 13.0434783  | 1 | 1 | 1 | 13.2  | 4.44  | 47 | 1 |
| Q7Z2K6     | Endoplasmic | 2.65486726  | 2 | 2 | 2 | 100.2 | 7.52  | 33 | 2 |
| Q8N0U8     | Vitamin K ε | 10.2272727  | 2 | 2 | 2 | 19.8  | 9.13  | 41 | 2 |

|            |                       |   |   |   |       |      |    |   |
|------------|-----------------------|---|---|---|-------|------|----|---|
| 060341     | Lysine-spec3.16901408 | 2 | 2 | 2 | 92.8  | 6.52 | 29 | 2 |
| Q8WYP5     | Protein EL10.48543689 | 1 | 1 | 1 | 252.3 | 6.6  | 68 | 1 |
| O43772     | Mitochondri6.97674419 | 2 | 2 | 2 | 32.9  | 9.41 | 27 | 2 |
| Q55QH4     | DBP2 protei3.55427474 | 3 | 3 | 3 | 119.2 | 6.8  | 32 | 3 |
| Q96B36     | Proline-ric 11.71875  | 2 | 2 | 2 | 27.4  | 4.75 | 36 | 2 |
| Q12972     | Nuclear inf14.2450142 | 3 | 3 | 3 | 38.5  | 7.37 | 32 | 3 |
| Q08722     | Leukocyte s5.88235294 | 2 | 2 | 2 | 35.2  | 7.21 | 35 | 2 |
| Q969H6     | Ribonuclea7.36196319  | 1 | 1 | 1 | 18.8  | 7.27 | 66 | 1 |
| P61457     | Pterin-4-a13.4615385  | 1 | 1 | 1 | 12    | 6.8  | 30 | 1 |
| Q14376     | UDP-glucose8.04597701 | 1 | 1 | 1 | 38.3  | 6.73 | 41 | 1 |
| P21912     | Succinate c8.21428571 | 2 | 2 | 2 | 31.6  | 8.76 | 36 | 2 |
| B2R4D5     | Actin-relat12.9213483 | 2 | 2 | 2 | 20.5  | 8.59 | 35 | 2 |
| Q92544     | Transmembr2.64797508  | 1 | 1 | 1 | 74.5  | 6.54 | 57 | 1 |
| Q16643     | Drebrin OS-2.77349769 | 1 | 1 | 1 | 71.4  | 4.45 | 48 | 1 |
| AOA090N8E9 | Enhancer of2.39680426 | 1 | 1 | 1 | 86    | 7.21 | 0  | 1 |
| O95139     | NADH dehyd 7.8125     | 1 | 1 | 1 | 15.5  | 9.63 | 59 | 1 |
| AOA024RDJ1 | DC2 protei8.05369128  | 1 | 1 | 1 | 16.8  | 9.13 | 57 | 1 |
| Q5H9R7     | Serine/thrc1.26002291 | 1 | 1 | 1 | 97.6  | 4.6  | 47 | 1 |
| Q9BX69     | Caspase rec0.96432015 | 1 | 1 | 1 | 116.4 | 6.37 | 55 | 1 |
| MOR2C6     | Uncharacter5.78231293 | 2 | 2 | 2 | 65.7  | 6.54 | 13 | 2 |
| Q4VXZ2     | Vacuolar pi4.14937759 | 2 | 2 | 2 | 82.2  | 5.99 | 29 | 2 |
| Q7Z6E9     | E3 ubiquiti1.61830357 | 2 | 2 | 2 | 201.4 | 9.64 | 34 | 2 |
| H9ZYJ2     | Thioredoxir17.1428571 | 2 | 2 | 2 | 11.7  | 4.92 | 59 | 2 |
| A8K556     | cDNA FLJ7827.28291317 | 2 | 2 | 2 | 40.3  | 8.15 | 47 | 2 |
| Q13616     | Cullin-1 OS4.12371134 | 3 | 3 | 3 | 89.6  | 8    | 29 | 3 |
| Q9H4L4     | Sentrin-spe2.43902439 | 1 | 1 | 1 | 65    | 8.56 | 51 | 1 |
| Q53HE6     | HSPC163 prc14.3884892 | 1 | 1 | 1 | 16    | 6.98 | 30 | 1 |
| P08047     | Transcripti3.56687898 | 1 | 1 | 1 | 80.6  | 7.34 | 27 | 1 |
| Q5HYM3     | Oxysterol-t1.23595506 | 1 | 1 | 1 | 101.2 | 7.06 | 63 | 1 |
| C9JAJ9     | Histone-bir45.9459459 | 2 | 2 | 1 | 4.5   | 4.81 | 36 | 2 |
| Q16740     | ATP-depend17.3285199  | 2 | 2 | 2 | 30.2  | 8.09 | 26 | 2 |
| Q17RY6     | Lymphocyte 6.06060606 | 1 | 1 | 1 | 18.7  | 7.43 | 46 | 1 |
| Q7Z5G4     | Golgin sub10.9489051  | 1 | 1 | 1 | 15.8  | 7.05 | 38 | 1 |
| P30536     | Translocat4.73372781  | 1 | 2 | 1 | 18.8  | 9.36 | 56 | 1 |
| Q1HDL3     | HBeAg-bindi6.68896321 | 2 | 2 | 2 | 32    | 7.62 | 50 | 2 |
| AOA0U1RRB6 | Exocyst con1.34969325 | 1 | 1 | 1 | 94.6  | 6.46 | 48 | 1 |
| Q9H5V9     | UPF0428 prc6.30630631 | 1 | 1 | 1 | 25.6  | 8.73 | 0  | 1 |
| Q96A26     | Protein FAM7.14285714 | 1 | 1 | 1 | 17.3  | 9.77 | 0  | 1 |
| O75942     | Major prior4.21052632 | 1 | 1 | 1 | 30.7  | 9    | 43 | 1 |
| AOA024RBR3 | Density-reg12.6262626 | 2 | 2 | 2 | 22.1  | 5.3  | 45 | 2 |
| AOA0S2Z5U3 | Heterogenec4.36300175 | 2 | 3 | 1 | 63.6  | 7.3  | 34 | 2 |
| Q9NXV6     | CDKN2A-inte3.96551724 | 2 | 2 | 2 | 61.1  | 9.01 | 35 | 2 |
| Q5UIPO     | Telomere-a1.17313916  | 2 | 2 | 2 | 274.3 | 5.52 | 0  | 2 |
| E9PEM5     | Lipopolysac0.54368932 | 1 | 1 | 1 | 286.8 | 5.52 | 39 | 1 |
| AOA0C4DFN3 | Monoglyceri4.47284345 | 1 | 1 | 1 | 34.3  | 6.58 | 56 | 1 |
| Q6FIE5     | PHP14 prote 9.6       | 1 | 1 | 1 | 13.8  | 6.07 | 56 | 1 |
| Q6UVK1     | Chondroitir2.06718346 | 2 | 2 | 2 | 250.4 | 5.47 | 36 | 2 |
| AOA0A0MQR2 | Protein RTF9.22619048 | 2 | 2 | 2 | 37.5  | 8.44 | 17 | 2 |
| B2RB12     | cDNA, FLJ985.52272727 | 2 | 2 | 2 | 39.9  | 4.53 | 38 | 2 |
| Q14116     | Interleukir10.3626943 | 2 | 2 | 2 | 22.3  | 4.67 | 46 | 2 |
| Q96TC7     | Regulator c2.34042553 | 1 | 1 | 1 | 52.1  | 5.1  | 41 | 1 |
| Q9UNN5     | FAS-associ2.23076923  | 1 | 1 | 1 | 73.9  | 4.88 | 46 | 1 |
| Q6IAQ2     | SDHC protei12.4260355 | 2 | 2 | 2 | 18.6  | 9.69 | 38 | 2 |
| B7Z2R7     | Acyl-CoA-bi3.63288719 | 1 | 1 | 1 | 58.8  | 5.26 | 40 | 1 |
| AOA0A0MSV9 | Tapasin OS-2.18253968 | 1 | 1 | 1 | 53.9  | 7.08 | 51 | 1 |
| Q9H2U2     | Inorganic p5.68862275 | 1 | 1 | 1 | 37.9  | 7.39 | 62 | 1 |
| Q969N2     | GPI transan2.24913495 | 1 | 1 | 1 | 65.7  | 8.38 | 40 | 1 |
| B4E2A6     | cDNA FLJ551.46276596  | 1 | 1 | 1 | 83.9  | 6.84 | 50 | 1 |
| O43709     | Probable 1f7.82918149 | 1 | 1 | 1 | 31.9  | 8.73 | 0  | 1 |
| Q9HCN8     | Stromal cel9.04977376 | 1 | 1 | 1 | 23.6  | 7.03 | 0  | 1 |
| P30626     | Sorcin OS=6.06060606  | 1 | 1 | 1 | 21.7  | 5.59 | 36 | 1 |
| C9J5N1     | PTGES3L-AAF3.03030303 | 1 | 1 | 1 | 55    | 6.55 | 47 | 1 |
| Q92576     | PHD finger0.63756744  | 1 | 1 | 1 | 229.3 | 6.96 | 46 | 1 |
| B4DGG0     | cDNA FLJ589.27835052  | 1 | 1 | 1 | 22.2  | 8.43 | 42 | 1 |
| B4DN80     | Peptidyl-pt6.73758865 | 1 | 1 | 1 | 33    | 9.26 | 0  | 1 |
| Q8WVM0     | Dimethylade4.04624277 | 1 | 1 | 1 | 39.5  | 9.26 | 44 | 1 |
| AOA024RCN9 | Euchromatic2.47933884 | 1 | 1 | 1 | 132.3 | 5.45 | 0  | 1 |
| AOA0C4DG49 | Poliovirus 4.31654676 | 2 | 2 | 2 | 45.3  | 6.52 | 61 | 2 |
| Q8IV08     | Phospholipe2.44897959 | 1 | 1 | 1 | 54.7  | 6.47 | 51 | 1 |
| Q9NRX5     | Serine inc2.86975717  | 1 | 1 | 1 | 50.5  | 5.85 | 55 | 1 |
| J3KPT4     | TraB domair3.16622691 | 1 | 1 | 1 | 42.7  | 8    | 45 | 1 |
| B2RE59     | cDNA, FLJ9:6.02006689 | 1 | 1 | 1 | 33.6  | 8.03 | 27 | 1 |
| Q9GZR7     | ATP-depend5.00582072  | 3 | 3 | 3 | 96.3  | 9.06 | 30 | 3 |

|            |             |             |   |   |   |       |      |    |   |
|------------|-------------|-------------|---|---|---|-------|------|----|---|
| Q9NP71     | Carbohydrat | 1.76056338  | 1 | 1 | 1 | 93    | 8.41 | 50 | 1 |
| Q7Z4W1     | L-xylulose  | 9.01639344  | 2 | 2 | 2 | 25.9  | 8.1  | 39 | 2 |
| P17568     | NADH dehydi | 14.5985401  | 2 | 2 | 2 | 16.4  | 8.92 | 43 | 2 |
| AOMNP2     | CDW11/WDR5  | 3.08123249  | 1 | 1 | 1 | 39.3  | 8.1  | 60 | 1 |
| Q8TF05     | Serine/thre | 1.68421053  | 1 | 1 | 1 | 106.9 | 4.77 | 40 | 1 |
| B2R7C2     | cDNA, FLJ9  | 3.85109114  | 2 | 2 | 2 | 88.8  | 6.27 | 39 | 2 |
| L0R6S1     | Alternative | 10.1851852  | 1 | 1 | 1 | 11.5  | 8.48 | 42 | 1 |
| Q0D2I6     | Fasciculati | 4.81586402  | 1 | 1 | 1 | 39.5  | 4.59 | 41 | 1 |
| B2RDR4     | cDNA, FLJ9  | 5.4631829   | 2 | 2 | 2 | 47.9  | 7.68 | 39 | 2 |
| Q08379     | Golgin sub  | 3.29341317  | 2 | 2 | 2 | 113   | 5.02 | 33 | 2 |
| AOA0C4DGQ5 | Calpain sm  | 4.65838509  | 1 | 1 | 1 | 33.8  | 6.23 | 44 | 1 |
| Q4FZ45     | Chromosome  | 5.55555556  | 1 | 1 | 1 | 23.4  | 9.7  | 46 | 1 |
| Q9Y5S5     | DNA polyme  | 0.60949064  | 1 | 1 | 1 | 262.8 | 6.48 | 54 | 1 |
| Q7Z4X2     | Neuronal p  | 37.9746835  | 3 | 3 | 3 | 17.9  | 5.43 | 0  | 3 |
| Q92552     | 28S riboso  | 2.65700483  | 1 | 1 | 1 | 47.6  | 6.18 | 49 | 1 |
| B3KPC7     | Actin-rela  | 24.8366013  | 1 | 1 | 1 | 17    | 6.02 | 0  | 1 |
| J3KQJ1     | Sulfatase-  | n 8.125     | 2 | 2 | 2 | 35.9  | 9.19 | 0  | 2 |
| Q14CZ7     | FAST kinas  | 1.51057402  | 1 | 1 | 1 | 75.6  | 8.29 | 59 | 1 |
| Q53F19     | Nuclear ca  | 2.09677419  | 1 | 1 | 1 | 70.5  | 5.73 | 36 | 1 |
| Q9BSR8     | Protein YIF | 3.68852459  | 1 | 1 | 1 | 27.1  | 4.65 | 60 | 1 |
| Q9NW64     | Pre-mRNA-s  | 3.80952381  | 1 | 1 | 1 | 46.9  | 8.54 | 47 | 1 |
| AOAV96     | RNA-bindin  | 3.37268128  | 1 | 1 | 1 | 64.1  | 7.68 | 32 | 1 |
| Q9UNE7     | E3 ubiquiti | 3.96039604  | 1 | 1 | 1 | 34.8  | 5.87 | 56 | 1 |
| Q9UJZ1     | Stomatin-li | 10.6741573  | 2 | 2 | 2 | 38.5  | 7.39 | 25 | 2 |
| O60499     | Syntaxin-1  | 4.01606426  | 1 | 1 | 1 | 28.1  | 4.89 | 57 | 1 |
| Q9BSJ2     | Gamma-tubu  | 2.43902439  | 2 | 2 | 2 | 102.5 | 6.84 | 29 | 2 |
| Q9BT09     | Protein car | 6.83453237  | 1 | 1 | 1 | 30.7  | 5.49 | 37 | 1 |
| Q5SW79     | Centrosoma  | 10.69444444 | 1 | 1 | 1 | 175.2 | 7.11 | 44 | 1 |
| Q504R6     | RAB13 prote | 5.73770492  | 1 | 1 | 1 | 27.2  | 8.9  | 57 | 1 |
| B2RB52     | cDNA, FLJ9  | 4.92170022  | 2 | 3 | 2 | 49.8  | 9.44 | 31 | 2 |
| Q9BVJ8     | HEXA protei | 6.11246944  | 1 | 1 | 1 | 47.1  | 5    | 55 | 1 |
| P42858     | Huntingtin  | 0.47740293  | 1 | 1 | 1 | 347.4 | 6.2  | 0  | 1 |
| O60306     | Intron-bin  | 0.87542088  | 1 | 1 | 1 | 171.2 | 6.37 | 42 | 1 |
| Q9UQN3     | Charged mu  | 4.69483568  | 1 | 1 | 1 | 23.9  | 8.76 | 44 | 1 |
| Q6IN84     | rRNA methyl | 7.08215297  | 1 | 1 | 1 | 38.6  | 7.94 | 46 | 1 |
| Q9HC07     | Transmembr  | 14.1975309  | 2 | 2 | 2 | 34.9  | 7.02 | 0  | 2 |
| Q59FM4     | Scavenger   | 13.44234079 | 2 | 2 | 2 | 64.1  | 8.54 | 32 | 2 |
| AOA087WT44 | Heme oxyger | 3.24324324  | 1 | 1 | 1 | 41.6  | 5.44 | 53 | 1 |
| O95298     | NADH dehydi | 22.6890756  | 2 | 2 | 2 | 14.2  | 8.98 | 0  | 2 |
| Q5JRA6     | Melanoma ir | 1.78290509  | 2 | 2 | 2 | 213.6 | 4.84 | 23 | 2 |
| P11279     | Lysosome-a  | 6.23501199  | 2 | 2 | 2 | 44.9  | 8.75 | 40 | 2 |
| B3KM74     | cDNA FLJ10  | 7.2243346   | 1 | 1 | 1 | 29.6  | 6.77 | 41 | 1 |
| O75934     | Pre-mRNA-s  | 5.77777778  | 1 | 1 | 1 | 26.1  | 5.66 | 39 | 1 |
| Q9H490     | Phosphatid  | 2.29885057  | 1 | 1 | 1 | 50    | 7.72 | 65 | 1 |
| B2R694     | Terpene cyc | 1.77595628  | 1 | 1 | 1 | 83.4  | 6.61 | 0  | 1 |
| Q9UI09     | NADH dehydi | 14.4827586  | 2 | 2 | 2 | 17.1  | 9.63 | 43 | 2 |
| Q8IY37     | Probable A1 | 1.90146932  | 2 | 2 | 2 | 129.5 | 8.1  | 27 | 2 |
| Q8IWA5     | Choline tra | 2.54957507  | 2 | 2 | 1 | 80.1  | 8.57 | 36 | 2 |
| B4DT73     | Non-specifi | 2.23577236  | 1 | 1 | 1 | 55.4  | 9.19 | 48 | 1 |
| Q9NQT8     | Kinesin-li  | 0.60240964  | 1 | 1 | 1 | 202.7 | 5.88 | 35 | 1 |
| P62306     | Small nucle | 9.30232558  | 1 | 1 | 1 | 9.7   | 4.67 | 59 | 1 |
| Q13416     | Origin recc | 2.25303293  | 1 | 1 | 1 | 65.9  | 6.51 | 59 | 1 |
| Q9HCD5     | Nuclear rec | 1.72711572  | 1 | 1 | 1 | 65.5  | 9.6  | 42 | 1 |
| Q9Y5B6     | PAX3- and   | 12.07197383 | 2 | 2 | 2 | 104.7 | 5.68 | 60 | 2 |
| AOA024R726 | Protein ar  | 1.87861272  | 1 | 1 | 1 | 78.4  | 5.57 | 37 | 1 |
| A6NMQ1     | DNA polyme  | 4.15531335  | 3 | 4 | 3 | 166.4 | 5.81 | 22 | 3 |
| D3DQS4     | Formin binc | 1.179941    | 1 | 1 | 1 | 110.2 | 4.75 | 39 | 1 |
| Q5K651     | Sterile al  | 1.13278792  | 1 | 1 | 1 | 184.2 | 7.83 | 56 | 1 |
| Q02127     | Dihydroorot | 8.10126582  | 2 | 2 | 2 | 42.8  | 9.67 | 23 | 2 |
| Q8NBL1     | Protein O-  | 3.06122449  | 1 | 1 | 1 | 46.2  | 8.72 | 38 | 1 |
| P18074     | TFIIH basa  | 3.28947368  | 1 | 1 | 1 | 86.9  | 7.15 | 38 | 1 |
| Q6WKZ4     | Rab11 fami  | 10.93530787 | 1 | 1 | 1 | 137.1 | 5.43 | 50 | 1 |
| Q2TAA2     | Isoamyl acc | 9.67741935  | 1 | 1 | 1 | 27.6  | 5.3  | 23 | 1 |
| B4DMM7     | cDNA FLJ59  | 1.91972077  | 1 | 1 | 1 | 63.3  | 5.2  | 45 | 1 |
| G5E9A6     | Ubiquitin   | 7.82608696  | 3 | 4 | 2 | 105   | 5.33 | 26 | 3 |
| Q13618     | Cullin-3    | 05.69270833 | 1 | 2 | 1 | 88.9  | 8.48 | 0  | 1 |
| O43676     | NADH dehydi | 12.244898   | 1 | 2 | 1 | 11.4  | 9.2  | 0  | 1 |
| Q8WX19     | Transcripti | 2.19224283  | 1 | 1 | 1 | 65.2  | 9.7  | 43 | 1 |
| B4DKM0     | cDNA FLJ51  | 6.66666667  | 2 | 2 | 2 | 41.6  | 9.58 | 40 | 2 |
| Q7Z739     | YTH domain  | -3.24786325 | 2 | 2 | 2 | 63.8  | 9.04 | 33 | 2 |
| Q9NPF0     | CD320 anti  | 4.60992908  | 1 | 1 | 1 | 29    | 4.75 | 48 | 1 |
| Q96FQ6     | Protein S1  | (15.5339806 | 1 | 1 | 1 | 11.8  | 6.79 | 54 | 1 |
| J3KN01     | Afadin OS-  | f 0.9284544 | 1 | 1 | 1 | 207.5 | 6.37 | 35 | 1 |

|            |              |               |   |   |   |       |       |    |   |
|------------|--------------|---------------|---|---|---|-------|-------|----|---|
| Q9BVM2     | Protein DP   | 4.92610837    | 1 | 1 | 1 | 23.2  | 9.03  | 58 | 1 |
| Q5JSZ5     | Protein PR   | 0.58322118    | 1 | 1 | 1 | 242.8 | 8.34  | 37 | 1 |
| Q6PJT7     | Zinc finger  | 2.44565217    | 1 | 1 | 1 | 82.8  | 7.31  | 43 | 1 |
| Q9NP58     | ATP-binding  | 1.42517815    | 1 | 1 | 1 | 93.8  | 8.48  | 50 | 1 |
| AOA0S2Z5U7 | Diablo-like  | 9.62343096    | 2 | 2 | 2 | 27.1  | 5.9   | 26 | 2 |
| Q6IA86     | Elongator c  | 1.4527845     | 1 | 1 | 1 | 92.4  | 5.96  | 43 | 1 |
| Q6P1N0     | Coiled-coil  | 1.15667718    | 1 | 1 | 1 | 104   | 8.09  | 45 | 1 |
| Q9V5X3     | Sorting nex  | 5.94059406    | 2 | 2 | 2 | 46.8  | 6.76  | 42 | 2 |
| A8K1U9     | cDNA FLJ     | 7672.70635995 | 2 | 2 | 2 | 83    | 8.81  | 30 | 2 |
| Q59HH7     | X-ray repair | 1.54559505    | 1 | 1 | 1 | 71    | 6.04  | 32 | 1 |
| C9JEH3     | Angio-assoc  | 2.52873563    | 1 | 1 | 1 | 46.8  | 4.42  | 47 | 1 |
| Q9UBU8     | Mortality    | 17.45856354   | 2 | 2 | 2 | 41.4  | 9.28  | 0  | 2 |
| F8VYN9     | ADP-ribosyl  | 17.5257732    | 2 | 2 | 2 | 21.8  | 6.77  | 23 | 2 |
| Q99735     | Microsomal   | 9.52380952    | 1 | 1 | 1 | 16.6  | 9.55  | 50 | 1 |
| A3F768     | NF-kappaB    | 13.33333333   | 2 | 2 | 2 | 77.5  | 8.73  | 33 | 2 |
| B1AK66     | Smad nucle   | 2.02020202    | 1 | 1 | 1 | 45.8  | 9.99  | 54 | 1 |
| C9JEJ2     | Choline-ph   | 3.15789474    | 1 | 1 | 1 | 43.2  | 8.5   | 34 | 1 |
| Q6NUL6     | PITPNA prot  | 4.11392405    | 1 | 1 | 1 | 35.9  | 8.05  | 0  | 1 |
| Q9BYD6     | 39S ribosom  | 7.38461538    | 1 | 1 | 1 | 36.9  | 8.78  | 46 | 1 |
| I1E4Y6     | PERQ amino   | 0.8327025     | 1 | 1 | 1 | 152.4 | 5.6   | 34 | 1 |
| B2R4I8     | cDNA, FLJ    | 972.77202073  | 1 | 1 | 1 | 21.7  | 5.39  | 35 | 1 |
| H3BND4     | Pyridoxal-c  | 2.3573201     | 1 | 1 | 1 | 88.7  | 5.48  | 43 | 1 |
| Q9UL63     | Muskelin     | 051.76870748  | 1 | 1 | 1 | 84.7  | 6.34  | 40 | 1 |
| P55081     | Microfibril  | 7.97266515    | 2 | 2 | 2 | 51.9  | 4.98  | 35 | 2 |
| P37235     | Hippocalcir  | 8.80829016    | 2 | 2 | 2 | 22.3  | 5.35  | 0  | 2 |
| 060563     | Cyclin-T1    | (3.58126722   | 1 | 1 | 1 | 80.6  | 8.78  | 0  | 1 |
| Q9NV70     | Exocyst con  | 1.23042506    | 1 | 1 | 1 | 101.9 | 6.61  | 48 | 1 |
| AOA068F658 | Glucosylcer  | 2.6119403     | 1 | 1 | 1 | 59.7  | 7.61  | 0  | 1 |
| Q14139     | Ubiquitin c  | 1.31332083    | 1 | 1 | 1 | 122.5 | 5.24  | 32 | 1 |
| Q9NPA0     | ER membran   | 6.61157025    | 1 | 1 | 1 | 26.5  | 9.25  | 0  | 1 |
| 014684     | Prostaglan   | 6.57894737    | 1 | 2 | 1 | 17.1  | 9.5   | 78 | 1 |
| P61764     | Syntaxin-bi  | 1.68350168    | 1 | 1 | 1 | 67.5  | 6.96  | 41 | 1 |
| Q3ZAQ7     | Vacuolar A   | 111.8811881   | 1 | 1 | 1 | 11.3  | 7.24  | 43 | 1 |
| Q96A35     | 39S ribosom  | 6.01851852    | 1 | 1 | 1 | 24.9  | 9.29  | 49 | 1 |
| B2RBY4     | DNA primase  | 7.85714286    | 2 | 2 | 2 | 49.9  | 8.38  | 30 | 2 |
| Q9POM9     | 39S ribosom  | 6.75675676    | 1 | 1 | 1 | 16.1  | 10.42 | 46 | 1 |
| H3BQK9     | Microtubule  | 0.26343519    | 2 | 2 | 1 | 860.5 | 5.38  | 52 | 2 |
| Q7L2J0     | 7SK snRNA    | 13.48330914   | 1 | 1 | 1 | 74.3  | 9.57  | 29 | 1 |
| Q9Y6D9     | Mitotic spi  | 1.53203343    | 1 | 1 | 1 | 83    | 5.92  | 44 | 1 |
| Q14331     | Protein FR   | 9.68992248    | 2 | 2 | 2 | 29.2  | 9.01  | 36 | 2 |
| Q9H330     | Transmembr   | 1.42700329    | 1 | 1 | 1 | 100.9 | 8.87  | 50 | 1 |
| Q14146     | Unhealthy    | 10.78740157   | 1 | 1 | 1 | 170.4 | 7.31  | 43 | 1 |
| B2RBM8     | cDNA, FLJ    | 91.45190563   | 1 | 1 | 1 | 123.5 | 7.42  | 39 | 1 |
| Q96Q11     | CCA tRNA m   | 7.83410138    | 2 | 2 | 2 | 50.1  | 8.1   | 30 | 2 |
| Q9Y2A7     | Nck-assoc    | 2.74822695    | 2 | 2 | 2 | 128.7 | 6.62  | 0  | 2 |
| Q8IZ73     | RNA pseudot  | 3.85321101    | 1 | 1 | 1 | 61.3  | 7.17  | 0  | 1 |
| Q9H0U6     | 39S ribosom  | 5             | 1 | 1 | 1 | 20.6  | 9.54  | 49 | 1 |
| D3DPK5     | SH3 domain   | 7.39299611    | 1 | 1 | 1 | 26.8  | 8.38  | 20 | 1 |
| Q9P2B2     | Prostaglan   | 1.47895336    | 1 | 1 | 1 | 98.5  | 6.61  | 50 | 1 |
| 015162     | Phospholipi  | 4.08805031    | 1 | 1 | 1 | 35    | 4.94  | 31 | 1 |
| Q6NZY4     | Zinc finger  | 3.11173975    | 1 | 1 | 1 | 78.5  | 4.87  | 0  | 1 |
| Q9H2W6     | 39S ribosom  | 8.2437276     | 1 | 1 | 1 | 31.7  | 7.05  | 0  | 1 |
| P36551     | Oxygen-depe  | 3.74449339    | 1 | 1 | 1 | 50.1  | 8.25  | 0  | 1 |
| P21281     | V-type prot  | 4.89236791    | 2 | 2 | 2 | 56.5  | 5.81  | 0  | 2 |
| B2R8X4     | cDNA, FLJ    | 92.64317181   | 1 | 1 | 1 | 51.2  | 4.97  | 44 | 1 |
| AOA024R1T1 | Ribosomal    | 19.55882353   | 1 | 1 | 1 | 15.4  | 10.74 | 32 | 1 |
| Q8IXM3     | 39S ribosom  | 10.9489051    | 1 | 1 | 1 | 15.4  | 9.57  | 44 | 1 |
| Q96D71     | RalBP1-ass   | 2.01005025    | 1 | 1 | 1 | 86.6  | 5.69  | 45 | 1 |
| AOA087WWS1 | THO complex  | 1.82648402    | 1 | 1 | 1 | 75.6  | 4.98  | 42 | 1 |
| P17050     | Alpha-N-ac   | 2.67639903    | 1 | 1 | 1 | 46.5  | 5.19  | 42 | 1 |
| HOY8X4     | 2'-deoxynuc  | 10.2880658    | 2 | 2 | 2 | 25.9  | 5.5   | 36 | 2 |
| Q12846     | Syntaxin-4   | 3.7037037     | 1 | 1 | 1 | 34.2  | 6.28  | 39 | 1 |
| P41214     | Eukaryotic   | 2.05479452    | 1 | 1 | 1 | 64.7  | 7.65  | 34 | 1 |
| Q8NFB3     | Nucleoporin  | 3.68421053    | 1 | 1 | 1 | 42.1  | 5.63  | 34 | 1 |
| P41440     | Folate trar  | 1.69204738    | 1 | 1 | 1 | 64.8  | 8.95  | 50 | 1 |
| Q96B49     | Mitochondri  | 37.8378378    | 1 | 1 | 1 | 8     | 4.89  | 32 | 1 |
| B2R7X3     | cDNA, FLJ    | 98.58676208   | 2 | 2 | 2 | 61.5  | 7.49  | 0  | 2 |
| P42771     | Cyclin-depe  | 14.1025641    | 1 | 1 | 1 | 16.5  | 5.81  | 29 | 1 |
| 015294     | UDP-N-acety  | 1.52963671    | 1 | 1 | 1 | 116.9 | 6.7   | 37 | 1 |
| P06280     | Alpha-galac  | 2.33100233    | 1 | 1 | 1 | 48.7  | 5.6   | 41 | 1 |
| P17676     | CCAAT/enhar  | 2.89855072    | 1 | 1 | 1 | 36.1  | 8.31  | 42 | 1 |
| Q9NZQ3     | NCK-interac  | 1.66204986    | 1 | 1 | 1 | 78.9  | 6.38  | 38 | 1 |
| G3V3G9     | Uncharacter  | 2.39680426    | 1 | 1 | 1 | 84.7  | 5.12  | 54 | 1 |

|            |                 |                   |   |   |   |       |       |    |   |
|------------|-----------------|-------------------|---|---|---|-------|-------|----|---|
| A0A140VJX5 | Testicular      | 6.4171123         | 2 | 2 | 2 | 62.9  | 8.63  | 20 | 2 |
| P42696     | RNA-binding     | 4.41860465        | 2 | 2 | 2 | 48.5  | 10.11 | 38 | 2 |
| K7ERV3     | Thymidine       | 13.74531835       | 1 | 1 | 1 | 28.6  | 8.56  | 0  | 1 |
| HOYJ66     | Dehydrogenase   | 8.77192982        | 2 | 2 | 2 | 44.8  | 9.03  | 30 | 2 |
| A0A024R7N7 | Interferon,     | 4.4               | 1 | 1 | 1 | 27.9  | 4.88  | 40 | 1 |
| Q49A26     | Putative        | o2.53164557       | 1 | 1 | 1 | 60.5  | 9.17  | 0  | 1 |
| A0A024R5U5 | ADAM metallo    | 11.60427807       | 1 | 1 | 1 | 84.1  | 7.77  | 31 | 1 |
| E7ESZ7     | NADH dehydro    | 2.56410256        | 1 | 1 | 1 | 44.7  | 8.34  | 43 | 1 |
| Q99700     | Ataxin-2        | OS1.29474486      | 1 | 1 | 1 | 140.2 | 9.57  | 39 | 1 |
| Q9Y2Z4     | Tyrosine        | -14.19287212      | 1 | 2 | 1 | 53.2  | 8.98  | 22 | 1 |
| Q86WV7     | CCDC43          | prot4.84581498    | 1 | 1 | 1 | 25.5  | 4.92  | 41 | 1 |
| 075223     | Gamma-glutamyl  | 16.4893617        | 2 | 2 | 2 | 21    | 5.14  | 16 | 2 |
| P51159     | Ras-related     | 9.50226244        | 2 | 2 | 2 | 24.9  | 5.22  | 23 | 2 |
| Q8N3D4     | EH domain       | -1.31319764       | 1 | 1 | 1 | 161.8 | 4.83  | 38 | 1 |
| 095453     | Poly(A)-speci   | 4.22535211        | 2 | 2 | 2 | 73.4  | 6.2   | 37 | 2 |
| 060508     | Pre-mRNA        | -p1.89982729      | 1 | 1 | 1 | 65.5  | 7.06  | 42 | 1 |
| Q9Y3Q3     | Transmembrane   | 4.60829493        | 1 | 1 | 1 | 24.8  | 5.6   | 45 | 1 |
| 043823     | A-kinase        | anl.87861272      | 1 | 1 | 1 | 76.1  | 5.15  | 38 | 1 |
| P29353     | SHC-transferrin | 4.97427101        | 2 | 2 | 2 | 62.8  | 6.44  | 32 | 2 |
| B2R4G1     | cDNA, FLJ9      | 19.3548387        | 1 | 1 | 1 | 10.1  | 9.52  | 0  | 1 |
| D6RFN0     | COP9            | signal2.28310502  | 1 | 1 | 1 | 49.7  | 5.81  | 37 | 1 |
| Q9UBB6     | Neurochondrin   | 3.15500686        | 2 | 2 | 2 | 78.8  | 5.48  | 37 | 2 |
| 043678     | NADH dehydro    | 2.2020202         | 2 | 2 | 2 | 10.9  | 9.57  | 24 | 2 |
| HOY626     | Uncharacterized | 1.36411333        | 1 | 1 | 1 | 107.9 | 7.25  | 42 | 1 |
| 043148     | mRNA cap        | g6.09243697       | 2 | 2 | 2 | 54.8  | 6.61  | 0  | 2 |
| Q9HCN4     | GPN-loop        | G12.94117647      | 1 | 1 | 1 | 41.7  | 4.92  | 43 | 1 |
| P14635     | G2/mitotic      | -6.69745958       | 1 | 1 | 1 | 48.3  | 7.47  | 0  | 1 |
| A0A0AOMTL5 | S-phase         | kin3.67816092     | 1 | 1 | 1 | 48.9  | 6.99  | 0  | 1 |
| 014907     | Tax1-binding    | 13.7096774        | 1 | 1 | 1 | 13.7  | 8.48  | 38 | 1 |
| 075376     | Nuclear         | rec0.90163934     | 1 | 1 | 1 | 270   | 7.11  | 27 | 1 |
| P53701     | Cytochrome      | 3.73134328        | 1 | 1 | 1 | 30.6  | 6.68  | 39 | 1 |
| A0A0S2Z5D6 | Abhydrolase     | 4.58452722        | 1 | 1 | 1 | 39.1  | 6.61  | 41 | 1 |
| Q9NUQ2     | 1-acyl-sn-gly   | 3.2967033         | 1 | 1 | 1 | 42    | 9.1   | 0  | 1 |
| B2R9X3     | cDNA, FLJ9      | 5.91397849        | 2 | 2 | 2 | 41.8  | 7.12  | 34 | 2 |
| Q9HD23     | Magnesium       | 12.25733634       | 1 | 1 | 1 | 50.3  | 6.87  | 36 | 1 |
| Q9NVV0     | Trimeric        | ir4.81099656      | 1 | 1 | 1 | 32.5  | 9.06  | 0  | 1 |
| P46108     | Adapter         | mol5.59210526     | 1 | 1 | 1 | 33.8  | 5.55  | 43 | 1 |
| Q9Y3B2     | Exosome         | con8.20512821     | 1 | 1 | 1 | 21.4  | 8.24  | 58 | 1 |
| Q6NUL7     | SPTLC1          | prot6.62768031    | 2 | 2 | 2 | 57.4  | 7.46  | 0  | 2 |
| Q8NCG7     | Sn1-specific    | 1.78571429        | 1 | 1 | 1 | 73.7  | 6.55  | 42 | 1 |
| Q92520     | Protein         | FAM5.72687225     | 1 | 1 | 1 | 24.7  | 8.29  | 48 | 1 |
| Q9NWT6     | Hypoxia-induc   | 1.16905444        | 1 | 1 | 1 | 40.3  | 5.57  | 0  | 1 |
| 095684     | FGFR1           | oncog6.01503759   | 1 | 1 | 1 | 43    | 4.81  | 0  | 1 |
| A8K940     | cDNA, FLJ77     | 1.13314448        | 1 | 1 | 1 | 112.2 | 7.3   | 38 | 1 |
| P10301     | Ras-related     | 7.33944954        | 1 | 1 | 1 | 23.5  | 6.93  | 36 | 1 |
| Q96AQ6     | Pre-B-cell      | 1.36798906        | 1 | 1 | 1 | 80.6  | 5.33  | 34 | 1 |
| P07199     | Major           | centr2.0033389    | 1 | 1 | 1 | 65.1  | 4.55  | 27 | 1 |
| Q8NC42     | E3 ubiquitin    | 6.25              | 1 | 1 | 1 | 43.1  | 6.54  | 0  | 1 |
| Q9COK1     | Zinc            | transf4.7826087   | 1 | 1 | 1 | 49.6  | 6.09  | 0  | 1 |
| Q92482     | Aquaporin       | -2.73972603       | 1 | 1 | 1 | 31.5  | 7.23  | 51 | 1 |
| Q8N5C7     | DTW domain      | -8.55263158       | 1 | 1 | 1 | 35.2  | 8.38  | 33 | 1 |
| G3V0E4     | Mitochondrial   | 7.14285714        | 2 | 2 | 2 | 54.2  | 6.83  | 24 | 2 |
| 000443     | Phosphatidyl    | 0.88967972        | 1 | 1 | 1 | 190.6 | 8.02  | 36 | 1 |
| Q9UNS1     | Protein         | tin0.91059603     | 1 | 1 | 1 | 138.6 | 5.4   | 43 | 1 |
| Q9P265     | Disco-inter     | 1.9035533         | 2 | 2 | 2 | 171.4 | 8.09  | 34 | 2 |
| B2R6F5     | Protein         | XRF4              | 1 | 1 | 1 | 39.6  | 5.12  | 34 | 1 |
| P49716     | CCAAT/enhancer  | 4.46096654        | 1 | 1 | 1 | 28.4  | 8.28  | 36 | 1 |
| Q32Q14     | NDUFA7          | prot7.43801653    | 1 | 1 | 1 | 13.5  | 10.4  | 40 | 1 |
| Q6UW78     | Ubiquitin       | -c23.655914       | 1 | 1 | 1 | 10.1  | 9.41  | 0  | 1 |
| A0A0AOMQX8 | Muscle          | blinc5.5          | 2 | 2 | 2 | 43    | 8.82  | 0  | 2 |
| P60602     | Reactive        | o21.5189873       | 1 | 1 | 1 | 8.2   | 9.33  | 0  | 1 |
| K7EM18     | Eukaryotic      | 27.2727273        | 1 | 1 | 1 | 13.6  | 7.9   | 0  | 1 |
| Q549M8     | CLE7            | OS-Hon4.09836066  | 1 | 1 | 1 | 28.1  | 6.65  | 45 | 1 |
| Q13867     | Bleomycin       | 14.61538462       | 2 | 2 | 2 | 52.5  | 6.27  | 0  | 2 |
| Q15006     | ER              | membrane6.3973064 | 1 | 1 | 1 | 34.8  | 6.57  | 34 | 1 |
| Q5T6F2     | Ubiquitin       | -e1.34048257      | 1 | 1 | 1 | 117   | 7.34  | 46 | 1 |
| Q9NPQ8     | Synembryon      | -76.77966102      | 2 | 2 | 2 | 59.7  | 5.33  | 0  | 2 |
| Q9HD33     | 39S             | ribosome4.8       | 1 | 1 | 1 | 29.4  | 10.37 | 29 | 1 |
| G8JLH6     | Tetraspanin     | 4.38596491        | 1 | 1 | 1 | 25.4  | 6.52  | 51 | 1 |
| Q5SNT2     | Transmembrane   | 1.5015015         | 1 | 1 | 1 | 72.2  | 9.22  | 49 | 1 |
| Q9H0P0     | Cytosolic       | 17.44047619       | 2 | 2 | 2 | 37.9  | 7.12  | 22 | 2 |
| Q9UNN8     | Endothelial     | 15.46218487       | 1 | 1 | 1 | 26.7  | 7.18  | 0  | 1 |
| Q5HYL6     | Putative        | ur5.68181818      | 1 | 2 | 1 | 39.5  | 5.19  | 0  | 1 |

|            |              |             |   |   |   |       |       |    |   |
|------------|--------------|-------------|---|---|---|-------|-------|----|---|
| 060566     | Mitotic ch   | 3.61904762  | 2 | 2 | 2 | 119.5 | 5.27  | 27 | 2 |
| Q9NVM9     | Protein ast  | 1.41643059  | 1 | 1 | 1 | 80.2  | 6.7   | 34 | 1 |
| Q15382     | GTP-binding  | 16.8478261  | 2 | 2 | 2 | 20.5  | 5.92  | 44 | 2 |
| Q15582     | Transformir  | 1.9033675   | 1 | 1 | 1 | 74.6  | 7.71  | 0  | 1 |
| A8K818     | cDNA FLJ757  | 4.70588235  | 1 | 1 | 1 | 54.9  | 8.19  | 0  | 1 |
| Q9UHQ9     | NADH-cytocl  | 4.26229508  | 1 | 1 | 1 | 34.1  | 9.38  | 47 | 1 |
| AOA0S2Z3F2 | V-raf murir  | 3.60065466  | 2 | 2 | 2 | 68    | 9.01  | 33 | 2 |
| Q9NX18     | Succinate c  | 5.42168675  | 1 | 1 | 1 | 19.6  | 6.8   | 44 | 1 |
| P38432     | Coilin OS=I  | 2.95138889  | 2 | 2 | 2 | 62.6  | 9.07  | 41 | 2 |
| P09497     | Clathrin li  | 6.98689956  | 1 | 1 | 1 | 25.2  | 4.64  | 0  | 1 |
| P11171     | Protein 4.11 | .73611111   | 1 | 1 | 1 | 97    | 5.58  | 0  | 1 |
| P26374     | Rab proteir  | 1.67682927  | 1 | 1 | 1 | 74    | 4.93  | 35 | 1 |
| A8K2G0     | Secretory c  | 7.98816568  | 1 | 1 | 1 | 37.8  | 7.11  | 0  | 1 |
| Q96RS6     | NudC domair  | 1.20068611  | 1 | 1 | 1 | 66.7  | 5.11  | 51 | 1 |
| Q86TI2     | Dipeptidyl   | 3.47624565  | 2 | 2 | 2 | 98.2  | 6.46  | 39 | 2 |
| B2R6Z3     | cDNA, FLJ9   | 7.19602978  | 2 | 2 | 2 | 45.8  | 9.39  | 0  | 2 |
| Q9H9L3     | Interferon-3 | .39943343   | 1 | 1 | 1 | 39.1  | 9.94  | 0  | 1 |
| Q86V21     | Acetoacetyl  | 1.48809524  | 1 | 1 | 1 | 75.1  | 6.24  | 37 | 1 |
| Q9Y2T2     | AP-3 compl   | e.1.9138756 | 1 | 1 | 1 | 46.9  | 6.93  | 42 | 1 |
| Q9NX74     | tRNA-dihyd   | 2.63691684  | 1 | 1 | 1 | 55    | 7.11  | 44 | 1 |
| AOA0B4J2F0 | Protein PIC  | 22.2222222  | 1 | 1 | 1 | 6.3   | 8.5   | 48 | 1 |
| Q8WVC4     | m-AAA prot   | e3.09278351 | 1 | 1 | 1 | 32.5  | 9.17  | 39 | 1 |
| O14910     | Protein lir  | 6.86695279  | 1 | 1 | 1 | 26    | 8.72  | 35 | 1 |
| Q9UKL0     | REST corep   | 3.29896907  | 1 | 2 | 1 | 53.3  | 7.03  | 45 | 1 |
| Q53LP3     | Ankyrin rej  | 3.61904762  | 1 | 1 | 1 | 55.6  | 7.03  | 38 | 1 |
| Q8IXB1     | DnaJ homol   | c3.40479193 | 2 | 2 | 2 | 91    | 7.18  | 25 | 2 |
| Q0ZFE3     | ATP synthas  | 4.42477876  | 1 | 1 | 1 | 24.8  | 10.1  | 0  | 1 |
| Q53Y06     | ATPase, H+   | 6.19469027  | 1 | 1 | 1 | 26.1  | 8     | 51 | 1 |
| Q9HB66     | Alternative  | e.26.984127 | 1 | 1 | 1 | 7.3   | 9.61  | 0  | 1 |
| P57678     | Gem-associ   | e1.03969754 | 1 | 1 | 1 | 120   | 6.04  | 0  | 1 |
| 060524     | Nuclear exp  | 1.57992565  | 2 | 2 | 2 | 122.9 | 6.35  | 42 | 2 |
| Q8WVX3     | Uncharacter  | e16.6666667 | 1 | 1 | 1 | 7.6   | 5.29  | 0  | 1 |
| Q96AY3     | Peptidyl-p   | 1.54639175  | 1 | 1 | 1 | 64.2  | 5.62  | 41 | 1 |
| B4DV95     | cDNA FLJ53   | 2.06896552  | 1 | 1 | 1 | 49    | 9.22  | 39 | 1 |
| P56385     | ATP synthas  | 14.4927536  | 1 | 1 | 1 | 7.9   | 9.35  | 56 | 1 |
| Q9ULC5     | Long-chain   | -3.22108346 | 2 | 2 | 2 | 75.9  | 6.92  | 0  | 2 |
| Q9NWB6     | Arginine ar  | 5.49450549  | 2 | 2 | 2 | 33.2  | 10.35 | 0  | 2 |
| Q7Z5L9     | Interferon   | 1.87393526  | 1 | 1 | 1 | 61    | 8.69  | 36 | 1 |
| AOA140VKA9 | Testis sect  | 4.09836066  | 1 | 1 | 1 | 25.8  | 7.37  | 37 | 1 |
| P61165     | Transmembr   | e10.1265823 | 1 | 2 | 1 | 9.1   | 5.83  | 64 | 1 |
| Q9Y3P9     | Rab GTPase   | -1.59027128 | 1 | 1 | 1 | 121.7 | 5.25  | 0  | 1 |
| Q96ET8     | Golgi appar  | 9.7826087   | 1 | 1 | 1 | 31.1  | 9.29  | 0  | 1 |
| Q9BX40     | Protein LSA  | 2.85714286  | 1 | 1 | 1 | 42    | 9.69  | 39 | 1 |
| Q9BQC3     | 2-(3-amino   | -8.38445808 | 2 | 2 | 2 | 52.1  | 5.53  | 0  | 2 |
| D3DWY7     | von Hippel   | -4.29184549 | 1 | 1 | 1 | 26.5  | 9.01  | 32 | 1 |
| HOY8P4     | U3 small n   | t2.93577982 | 1 | 1 | 1 | 61.4  | 9.04  | 30 | 1 |
| A6NGJ0     | Dynein lig   | 11.1842105  | 1 | 1 | 1 | 17    | 5.92  | 0  | 1 |
| P53804     | E3 ubiquiti  | 0.69135802  | 1 | 2 | 1 | 229.7 | 7.52  | 0  | 1 |
| Q59GG2     | Caspase 9    | i4.16666667 | 1 | 1 | 1 | 50.1  | 6.23  | 0  | 1 |
| O15234     | Protein CA   | 0.99573257  | 1 | 1 | 1 | 76.2  | 6.48  | 47 | 1 |
| Q5VTR2     | E3 ubiquiti  | l.12820513  | 1 | 1 | 1 | 113.6 | 5.94  | 36 | 1 |
| A6NMH8     | Tetraspanir  | 7.29927007  | 1 | 1 | 1 | 29.8  | 6.92  | 0  | 1 |
| Q8NCEO     | tRNA-splici  | l.93548387  | 1 | 1 | 1 | 53.2  | 7.85  | 33 | 1 |
| Q68EM7     | Rho GTPase   | -1.0215664  | 1 | 1 | 1 | 95.4  | 7.62  | 46 | 1 |
| Q8IY71     | MRPS17 prot  | 20.4225352  | 1 | 1 | 1 | 15.7  | 9.85  | 0  | 1 |
| O60493     | Sorting ne   | 4.9382716   | 1 | 1 | 1 | 18.8  | 8.66  | 41 | 1 |
| P17301     | Integrin a   | 0.59271804  | 1 | 1 | 1 | 129.2 | 5.31  | 50 | 1 |
| AOA087WYF7 | MICOS comp   | 17.08955224 | 1 | 1 | 1 | 29.2  | 9.45  | 18 | 1 |
| P51970     | NADH dehyd   | 14.5348837  | 2 | 2 | 2 | 20.1  | 7.65  | 0  | 2 |
| O95801     | Tetratricof  | 3.61757106  | 1 | 1 | 1 | 44.7  | 5.6   | 0  | 1 |
| Q9BQA1     | Methylosome  | 5.55555556  | 2 | 2 | 2 | 36.7  | 5.17  | 19 | 2 |
| Q96G21     | U3 small n   | t4.81099656 | 1 | 2 | 1 | 33.7  | 9.47  | 0  | 1 |
| P31937     | 3-hydroxyvi  | 3.86904762  | 1 | 1 | 1 | 35.3  | 8.13  | 23 | 1 |
| Q13823     | Nucleolar    | (2.18878249 | 2 | 2 | 2 | 83.6  | 9.25  | 40 | 2 |
| Q9BZ17     | Regulator    | c1.86335404 | 1 | 1 | 1 | 57.7  | 9.48  | 34 | 1 |
| HOY362     | Zinc trans   | 17.2413793  | 1 | 1 | 1 | 9.9   | 7.28  | 40 | 1 |
| Q12894     | Interferon   | -1.77865613 | 1 | 1 | 1 | 54.8  | 7.94  | 43 | 1 |
| Q68CZ2     | Tensin-3 O   | 51.66089965 | 1 | 1 | 1 | 155.2 | 6.81  | 16 | 1 |
| Q15386     | Ubiquitin-1  | .01569714   | 1 | 1 | 1 | 123.8 | 6.71  | 31 | 1 |
| P61599     | N-alpha-ace  | 5.05617978  | 1 | 1 | 1 | 20.4  | 5.03  | 40 | 1 |
| AOA0S2Z2Z3 | ATP-binding  | 1.32802125  | 1 | 1 | 1 | 82.7  | 9.33  | 0  | 1 |
| Q99595     | Mitochondri  | 18.128655   | 2 | 2 | 2 | 18    | 7.87  | 0  | 2 |
| Q9BU61     | NADH dehyd   | 7.60869565  | 1 | 1 | 1 | 20.3  | 8.22  | 34 | 1 |

|            |                         |   |   |   |       |       |    |   |
|------------|-------------------------|---|---|---|-------|-------|----|---|
| Q9NQZ2     | Something ε6.47181628   | 1 | 1 | 1 | 54.5  | 5.62  | 0  | 1 |
| Q6UWP7     | Lysocardiol2.41545894   | 1 | 1 | 1 | 48.9  | 8.62  | 36 | 1 |
| X6R2S6     | Signal pept10.0591716   | 1 | 1 | 1 | 18.3  | 8.72  | 29 | 1 |
| Q7KZ9      | Cytochrome 4.14634146   | 1 | 1 | 1 | 46    | 9.82  | 19 | 1 |
| O95071     | E3 ubiquitin0.57163273  | 1 | 1 | 1 | 309.2 | 5.85  | 37 | 1 |
| Q5SWX8     | Protein od4.40528634    | 1 | 1 | 1 | 51.1  | 5.92  | 23 | 1 |
| Q8NDH3     | Probable an2.48565966   | 1 | 1 | 1 | 55.8  | 6.87  | 0  | 1 |
| Q9H974     | Queuine tr12.40963855   | 1 | 1 | 1 | 46.7  | 6.81  | 49 | 1 |
| B3KM47     | cDNA FLJ102 2.5         | 1 | 1 | 1 | 111   | 5.45  | 0  | 1 |
| O00154     | Cytosolic ε2.89473684   | 1 | 1 | 1 | 41.8  | 8.54  | 36 | 1 |
| Q7Z3B4     | Nucleoporin2.56410256   | 1 | 1 | 1 | 55.4  | 7.02  | 22 | 1 |
| D3VVH5     | Ataxin 3 vε7.91139241   | 2 | 6 | 2 | 36.9  | 4.81  | 0  | 2 |
| Q6P587     | Acylpyruvate7.14285714  | 1 | 1 | 1 | 24.8  | 7.39  | 27 | 1 |
| O95365     | Zinc finger4.62328767   | 1 | 1 | 1 | 61.4  | 5.19  | 0  | 1 |
| AOA024QZW2 | Nucleolar p7.00389105   | 2 | 2 | 2 | 29.4  | 9.67  | 27 | 2 |
| Q9H5X1     | MIP18 famil 8.75        | 1 | 1 | 1 | 18.3  | 4.88  | 43 | 1 |
| P49406     | 39S ribosom3.42465753   | 1 | 1 | 1 | 33.5  | 9.5   | 15 | 1 |
| Q13740     | CD166 antiq2.74442539   | 1 | 1 | 1 | 65.1  | 6.25  | 27 | 1 |
| B5BUC0     | Glycogen sy5.71428571   | 1 | 1 | 1 | 46.7  | 8.87  | 0  | 1 |
| Q9Y6V7     | Probable A12.07039337   | 1 | 1 | 1 | 54.2  | 9.06  | 0  | 1 |
| O96019     | Actin-like 3.26340326   | 1 | 1 | 1 | 47.4  | 5.6   | 24 | 1 |
| Q13610     | Periodic t11.79640719   | 1 | 1 | 1 | 55.8  | 4.77  | 39 | 1 |
| H7BY58     | Protein-L-j 13.986014   | 2 | 2 | 2 | 30.3  | 6.73  | 0  | 2 |
| Q8NBQ5     | Estradiol 1 6           | 1 | 1 | 1 | 32.9  | 9.07  | 22 | 1 |
| A8K7Z3     | cDNA FLJ7721.78359096   | 1 | 1 | 1 | 95.9  | 5.07  | 0  | 1 |
| Q9BYT8     | Neurolysin,3.40909091   | 2 | 2 | 2 | 80.6  | 6.64  | 0  | 2 |
| AOA087WT20 | DDB1- and (3.01507538   | 2 | 2 | 2 | 67.5  | 9.29  | 20 | 2 |
| P82673     | 28S ribosom8.35913313   | 1 | 1 | 1 | 36.8  | 8.24  | 0  | 1 |
| P49914     | 5-formyltet4.92610837   | 1 | 1 | 1 | 23.2  | 7.88  | 0  | 1 |
| Q9H967     | WD repeat-c2.23642173   | 1 | 1 | 1 | 69.7  | 9.25  | 36 | 1 |
| Q5HYI8     | Rab-like p18.89830508   | 1 | 1 | 1 | 26.4  | 7.11  | 0  | 1 |
| Q9HC06     | Cd002 prote2.06718346   | 1 | 1 | 1 | 43.5  | 5.77  | 32 | 1 |
| Q9UHW5     | GPN-loop G16.33802817   | 1 | 1 | 1 | 32.7  | 4.5   | 0  | 1 |
| Q86XL3     | Ankyrin rej1.81236674   | 1 | 1 | 1 | 104.1 | 7.09  | 0  | 1 |
| Q9Y3A4     | Ribosomal F12.1428571   | 2 | 2 | 2 | 32.3  | 9.58  | 23 | 2 |
| Q96B26     | Exosome con3.98550725   | 1 | 1 | 1 | 30    | 5.3   | 32 | 1 |
| Q9NVI1     | Fanconi anc0.75301205   | 1 | 1 | 1 | 149.2 | 6.74  | 42 | 1 |
| Q9NRN7     | L-aminoamidif5.50161812 | 2 | 2 | 2 | 35.8  | 6.8   | 43 | 2 |
| Q8WY22     | BRI3-bindir7.56972112   | 1 | 1 | 1 | 27.8  | 9.44  | 0  | 1 |
| AOA0G2JHC2 | Phostensin 4.4045677    | 1 | 1 | 1 | 68    | 5.45  | 0  | 1 |
| P61086     | Ubiquitin-c 5           | 1 | 1 | 1 | 22.4  | 5.44  | 31 | 1 |
| Q9H6W3     | Bifunctionε 1.5600624   | 1 | 1 | 1 | 71    | 6.46  | 0  | 1 |
| Q14790     | Caspase-8 (3.75782881   | 1 | 1 | 1 | 55.4  | 5.1   | 22 | 1 |
| P56556     | NADH dehydi7.14285714   | 1 | 1 | 1 | 17.9  | 10.14 | 32 | 1 |
| Q9GZP9     | Derlin-2 Oε12.5523013   | 1 | 1 | 1 | 27.5  | 7.28  | 0  | 1 |
| P13473     | Lysosome-a:1.95121951   | 1 | 1 | 1 | 44.9  | 5.63  | 49 | 1 |
| O75165     | DnaJ homolc0.57958092   | 1 | 1 | 1 | 254.3 | 6.74  | 0  | 1 |
| B8ZZN6     | Small ubiq8.21917808    | 1 | 1 | 1 | 16.6  | 6.2   | 0  | 1 |
| Q9H773     | dCTP pyropl18.2352941   | 1 | 1 | 1 | 18.7  | 5.03  | 14 | 1 |
| Q9UJ83     | 2-hydroxyac3.11418685   | 1 | 1 | 1 | 63.7  | 7.36  | 0  | 1 |
| Q9ULI3     | Protein HEC0.94134685   | 1 | 1 | 1 | 147.4 | 6.18  | 31 | 1 |
| P52735     | Guanine nuc1.93621868   | 1 | 2 | 1 | 101.2 | 7.08  | 22 | 1 |
| I7JB59     | ABCG2 prote1.52671756   | 1 | 1 | 1 | 72.4  | 8.76  | 45 | 1 |
| Q8N122     | Regulatory-0.97378277   | 1 | 1 | 1 | 148.9 | 6.89  | 39 | 1 |
| Q92925     | SWI/SNF-re13.20150659   | 1 | 1 | 1 | 58.9  | 9.64  | 0  | 1 |
| Q9NVH2     | Integrator 1.76715177   | 1 | 1 | 1 | 106.8 | 8.02  | 0  | 1 |
| Q96K37     | Solute carri5.85365854  | 1 | 1 | 1 | 44.7  | 9.79  | 28 | 1 |
| AOA140TA86 | MICOS comp17.85714286   | 1 | 1 | 1 | 15.4  | 9.03  | 34 | 1 |
| Q96T76     | MMS19 nuclc2.23300971   | 1 | 1 | 1 | 113.2 | 6.35  | 24 | 1 |
| D6REA1     | Nucleotide 2.56410256   | 1 | 1 | 1 | 52.7  | 5.3   | 36 | 1 |
| P52306     | Rap1 GTPase 2.1416804   | 1 | 1 | 1 | 66.3  | 5.31  | 0  | 1 |
| B2R960     | cDNA, FLJ927.61245675   | 1 | 1 | 1 | 32.2  | 4.96  | 0  | 1 |
| P23229     | Integrin al 1.0619469   | 1 | 1 | 1 | 126.5 | 6.61  | 28 | 1 |
| Q9UNQ2     | Probable di2.87539936   | 1 | 1 | 1 | 35.2  | 9.99  | 40 | 1 |
| O14647     | Chromodomai0.92997812   | 2 | 2 | 2 | 211.2 | 8.1   | 24 | 2 |
| Q8N556     | Actin filan2.19178082   | 1 | 1 | 1 | 80.7  | 8.68  | 0  | 1 |
| Q13526     | Peptidyl-p13.4969325    | 1 | 1 | 1 | 18.2  | 8.82  | 0  | 1 |
| AOA024R8V6 | Ubiquitin ε1.15761354   | 1 | 1 | 1 | 122.8 | 9.7   | 35 | 1 |
| Q8N2G8     | GH3 domain-1.50943396   | 1 | 1 | 1 | 57.5  | 7.88  | 35 | 1 |
| O95881     | Thioredoxir5.23255814   | 1 | 1 | 1 | 19.2  | 5.4   | 20 | 1 |
| Q6PJ05     | ATPase, H+ 9.71659919   | 1 | 1 | 1 | 28.2  | 9.29  | 15 | 1 |
| AOA024R074 | Synaptobrev3.46153846   | 1 | 1 | 1 | 30.2  | 8.37  | 36 | 1 |
| P49773     | Histidine t11.11111111  | 1 | 1 | 1 | 13.8  | 6.95  | 33 | 1 |

|            |             |             |   |   |   |        |       |    |   |
|------------|-------------|-------------|---|---|---|--------|-------|----|---|
| D3DU01     | Transmembr  | 7.15990453  | 1 | 1 | 1 | 47.5   | 6.65  | 0  | 1 |
| Q9H3G5     | Probable sc | 1.68067227  | 1 | 1 | 1 | 54.1   | 5.62  | 56 | 1 |
| C9JJ19     | 28S ribosom | 8.44444444  | 1 | 1 | 1 | 26.3   | 9.89  | 0  | 1 |
| Q9Y5Q9     | General tr  | 1.35440181  | 1 | 1 | 1 | 101.2  | 5.07  | 26 | 1 |
| P42695     | Condensin-2 | .67022697   | 2 | 2 | 2 | 168.8  | 7.5   | 0  | 2 |
| P23368     | NAD-depend  | 2.05479452  | 1 | 1 | 1 | 65.4   | 7.61  | 30 | 1 |
| 095394     | Phosphoacet | 2.39852399  | 1 | 1 | 1 | 59.8   | 6.25  | 19 | 1 |
| P32456     | Guanylate-t | 4.06091371  | 1 | 1 | 1 | 67.2   | 5.71  | 0  | 1 |
| Q9BT22     | Chitobiosyl | 2.15517241  | 1 | 1 | 1 | 52.5   | 7.23  | 33 | 1 |
| Q5VT52     | Regulation  | 1.30047912  | 1 | 1 | 1 | 155.9  | 7.42  | 41 | 1 |
| Q13564     | NEDD8-activ | 4.3071161   | 1 | 1 | 1 | 60.2   | 5.4   | 17 | 1 |
| Q6PJG6     | BRCA1-assoc | 1.09622412  | 1 | 1 | 1 | 88.1   | 5.27  | 46 | 1 |
| Q9BVW5     | TIMELESS-ir | 3.65448505  | 1 | 1 | 1 | 34.5   | 4.82  | 18 | 1 |
| Q5HY14     | Putative ur | 2.61324042  | 1 | 1 | 1 | 63.8   | 8.51  | 37 | 1 |
| H0Y9X1     | Translatior | 6.19834711  | 1 | 1 | 1 | 27.7   | 9.57  | 25 | 1 |
| Q9H6S3     | Epidermal   | 4.33566434  | 2 | 2 | 2 | 80.6   | 6.84  | 0  | 2 |
| Q53H10     | Postreplic  | 2.82828283  | 1 | 1 | 1 | 56.2   | 7.59  | 25 | 1 |
| E9PLP0     | Cysteine--t | 8.59375     | 1 | 1 | 1 | 14.3   | 9.13  | 0  | 1 |
| P60520     | Gamma-amin  | 10.2564103  | 1 | 1 | 1 | 13.7   | 8.1   | 28 | 1 |
| Q5BJF2     | Transmembr  | 4.54545455  | 1 | 1 | 1 | 20.8   | 9.38  | 37 | 1 |
| P49902     | Cytosolic p | 1.60427807  | 1 | 1 | 1 | 64.9   | 6.14  | 26 | 1 |
| Q9BW85     | Coiled-coil | 2.47678019  | 1 | 1 | 1 | 37.1   | 5.92  | 39 | 1 |
| Q6P1M0     | Long-chain  | 2.95489891  | 1 | 1 | 1 | 72     | 8.47  | 22 | 1 |
| Q8NDX6     | Zinc finger | 11.9170984  | 1 | 1 | 1 | 21.8   | 9.19  | 17 | 1 |
| Q96PC5     | Melanoma ir | 0.84985836  | 1 | 1 | 1 | 159.7  | 4.69  | 36 | 1 |
| Q6NXR4     | TEL02-inter | 3.1496063   | 1 | 1 | 1 | 56.9   | 7.09  | 23 | 1 |
| P49459     | Ubiquitin-c | 6.57894737  | 1 | 1 | 1 | 17.3   | 5.15  | 29 | 1 |
| Q9ULJ3     | Zinc finger | 1.12570356  | 1 | 1 | 1 | 118.8  | 8.29  | 30 | 1 |
| Q8WXI7     | Mucin-16 O  | 0.06203902  | 1 | 1 | 1 | 1518.2 | 5.26  | 33 | 1 |
| Q9UH65     | Switch-ass  | 1.53846154  | 1 | 1 | 1 | 69     | 5.87  | 35 | 1 |
| A6NMN0     | Phosphoryl  | 1.20967742  | 1 | 1 | 1 | 139    | 6.18  | 37 | 1 |
| P29992     | Guanine nuc | 3.89972145  | 1 | 1 | 1 | 42.1   | 5.69  | 0  | 1 |
| Q7Z7H8     | 39S ribosom | 3.83141762  | 1 | 1 | 1 | 29.3   | 9.58  | 28 | 1 |
| Q5U5X0     | Complex III | 17.3076923  | 1 | 1 | 1 | 11.9   | 9.66  | 0  | 1 |
| Q7Z5K2     | Wings apart | 1.51260504  | 1 | 1 | 1 | 132.9  | 5.44  | 0  | 1 |
| Q53GN7     | Mitochondri | 3.41685649  | 1 | 1 | 1 | 50.3   | 8.12  | 0  | 1 |
| Q96S66     | Chloride cl | 1.81488203  | 1 | 1 | 1 | 62     | 5.55  | 34 | 1 |
| 075394     | 39S ribosom | 16.9230769  | 1 | 1 | 1 | 7.6    | 10.8  | 0  | 1 |
| E9PL17     | Polyribonuc | 1.83486239  | 1 | 1 | 1 | 48.9   | 6.27  | 39 | 1 |
| P10515     | Dihydrolip  | 4.48222566  | 2 | 2 | 2 | 69     | 7.84  | 0  | 2 |
| B2RAQ9     | Proteasome  | 3.24909747  | 1 | 1 | 1 | 29.9   | 7.68  | 36 | 1 |
| Q3KRB4     | MRPS33 prot | 10.7142857  | 1 | 1 | 1 | 13.4   | 10.15 | 28 | 1 |
| A6P4V4     | Tyrosine-pr | 0.6870229   | 1 | 1 | 1 | 145.6  | 7.55  | 39 | 1 |
| B3KP47     | cDNA FLJ31  | 14.90797546 | 1 | 1 | 1 | 19.6   | 9.86  | 44 | 1 |
| AOA096LP25 | AP2-associ  | 3.52250489  | 1 | 1 | 1 | 54.4   | 5.12  | 0  | 1 |
| Q9NQS7     | Inner cent  | 1.85185185  | 1 | 1 | 1 | 105.4  | 9.44  | 22 | 1 |
| Q9NR33     | DNA polymer | 10.2564103  | 1 | 1 | 1 | 12.2   | 4.92  | 0  | 1 |
| 043488     | Aflatoxin F | 3.06406685  | 1 | 1 | 1 | 39.6   | 7.17  | 20 | 1 |
| Q9Y520     | Protein PRF | 1.10497238  | 1 | 1 | 1 | 316.7  | 9.13  | 0  | 1 |
| Q8NBN3     | Transmembr  | 1.98198198  | 1 | 1 | 1 | 63.4   | 6.74  | 0  | 1 |
| Q9POH9     | RER1 protei | 3.73831776  | 1 | 1 | 1 | 24.8   | 9.63  | 38 | 1 |
| AOA024R419 | KIAA0971, i | 1.83098592  | 1 | 1 | 1 | 81.4   | 8.05  | 32 | 1 |
| Q9NZ08     | Endoplasmic | 0.8501594   | 1 | 1 | 1 | 107.2  | 6.46  | 30 | 1 |
| Q9H6H4     | Receptor es | 8.94941634  | 1 | 1 | 1 | 29.4   | 9.73  | 0  | 1 |
| H3BMF4     | Protein spi | 2.44328098  | 1 | 1 | 1 | 61.1   | 7.84  | 19 | 1 |
| E7EVC7     | Autophagy-1 | 3.04487179  | 1 | 1 | 1 | 70     | 6.62  | 25 | 1 |
| Q59FZ4     | Serine/thre | 2.54403131  | 1 | 1 | 1 | 57.8   | 5.16  | 0  | 1 |
| AOA140VKF1 | Kinesin-lil | 1.79310345  | 1 | 1 | 1 | 81.3   | 7.83  | 0  | 1 |
| B2RBP3     | cDNA, FLJ9  | 3.23974082  | 1 | 1 | 1 | 51.8   | 5.45  | 28 | 1 |
| A8K8N5     | cDNA FLJ76  | 1.52057245  | 1 | 1 | 1 | 127.4  | 8.56  | 0  | 1 |
| P23511     | Nuclear tr  | 5.47550432  | 1 | 1 | 1 | 36.9   | 8.94  | 0  | 1 |
| Q6P2C8     | Mediator of | 3.53697749  | 1 | 1 | 1 | 35.4   | 9.31  | 0  | 1 |
| Q13601     | KRR1 small  | 3.67454068  | 1 | 1 | 1 | 43.6   | 9.77  | 0  | 1 |
| AOA024R9D9 | Transcripti | 16.8316832  | 1 | 1 | 1 | 11.5   | 9.33  | 0  | 1 |
| Q92620     | Pre-mRNA-s  | 0.97799511  | 1 | 1 | 1 | 140.4  | 6.54  | 39 | 1 |
| B2RBN3     | cDNA, FLJ9  | 2.68041237  | 1 | 1 | 1 | 53.6   | 9.14  | 32 | 1 |
| P68036     | Ubiquitin-c | 7.14285714  | 1 | 1 | 1 | 17.9   | 8.51  | 33 | 1 |
| B3KME2     | cDNA FLJ10  | 1.99501247  | 1 | 1 | 1 | 46.5   | 5.85  | 40 | 1 |
| Q9UKG1     | DCC-intera  | 1.97461213  | 1 | 1 | 1 | 79.6   | 5.41  | 23 | 1 |
| Q99816     | Tumor susc  | 2.56410256  | 1 | 1 | 1 | 43.9   | 6.46  | 29 | 1 |
| Q8N5N7     | 39S ribosom | 9.49367089  | 1 | 1 | 1 | 18.3   | 7.88  | 20 | 1 |
| Q9NS87     | Kinesin-lil | 1.00864553  | 1 | 1 | 1 | 160.1  | 6     | 0  | 1 |
| Q9BSE5     | Agmatinase, | 8.52272727  | 1 | 1 | 1 | 37.6   | 7.59  | 0  | 1 |



|            |             |              |   |   |   |       |       |    |   |
|------------|-------------|--------------|---|---|---|-------|-------|----|---|
| V9HWI3     | Cathepsin I | 1.94174757   | 1 | 1 | 1 | 44.5  | 6.54  | 41 | 1 |
| P11117     | Lysosomal   | 1.89125296   | 1 | 1 | 1 | 48.3  | 6.74  | 41 | 1 |
| Q9NRL2     | Bromodomain | 0.70694087   | 1 | 1 | 1 | 178.6 | 6.6   | 33 | 1 |
| V9HW00     | Epididymis  | 2.66272189   | 1 | 1 | 1 | 39    | 9.57  | 27 | 1 |
| O95707     | Ribonucleas | 4.54545455   | 1 | 1 | 1 | 25.4  | 10.07 | 23 | 1 |
| Q5MIZ7     | Serine/thre | 1.06007067   | 1 | 1 | 1 | 97.4  | 4.96  | 0  | 1 |
| Q15427     | Splicing fa | 1.88679245   | 1 | 1 | 1 | 44.4  | 8.56  | 46 | 1 |
| A0A140VJMO | Testicular  | 0.66603235   | 1 | 1 | 1 | 116.5 | 6.77  | 51 | 1 |
| P28290     | Sperm-speci | 0.95313741   | 1 | 1 | 1 | 138.3 | 5.19  | 30 | 1 |
| Q68DH5     | LMBR1 domai | 4.31654676   | 1 | 1 | 1 | 81.1  | 7.5   | 26 | 1 |
| P53384     | Cytosolic f | 5.625        | 1 | 1 | 1 | 34.5  | 5.33  | 24 | 1 |
| Q9UK22     | F-box only  | 5.06756757   | 1 | 1 | 1 | 33.3  | 4.37  | 29 | 1 |
| B0QYN7     | SUMO-conju  | 5.43478261   | 1 | 1 | 1 | 20.4  | 8.46  | 33 | 1 |
| Q08499     | cAMP-speci  | 1.85414091   | 1 | 1 | 1 | 91.1  | 5.54  | 0  | 1 |
| Q5HY81     | Ubiquitin-1 | 5.55555556   | 1 | 1 | 1 | 20.5  | 9.55  | 29 | 1 |
| B5MDU6     | Lipid dropl | 2.7027027    | 1 | 1 | 1 | 42.6  | 6.93  | 34 | 1 |
| E7ENQ6     | Uncharacter | 3.2967033    | 1 | 1 | 1 | 30.1  | 6.9   | 37 | 1 |
| Q8N5F7     | NF-kappa-B  | 3.85542169   | 1 | 1 | 1 | 47.1  | 10.11 | 25 | 1 |
| Q99496     | E3 ubiquiti | 3.27380952   | 1 | 1 | 1 | 37.6  | 6.84  | 0  | 1 |
| Q7L4I2     | Arginine/sc | 2.76497696   | 1 | 1 | 1 | 50.5  | 11.33 | 0  | 1 |
| Q9Y6M7     | Sodium bic  | 1.48270181   | 1 | 1 | 1 | 136   | 6.71  | 41 | 1 |
| B2R8U9     | Caspase OS  | 2.22772277   | 1 | 1 | 1 | 45.1  | 5.91  | 29 | 1 |
| Q6NY19     | KN motif ar | 0.83333333   | 1 | 2 | 1 | 88.4  | 5.26  | 49 | 1 |
| Q6P2I3     | Fumarylacet | 5.73248408   | 1 | 1 | 1 | 34.6  | 7.75  | 20 | 1 |
| Q5J7U2     | TGF beta-ir | 3.84615385   | 1 | 1 | 1 | 30    | 10.27 | 0  | 1 |
| Q14789     | Golgin subf | 0.46026388   | 1 | 1 | 1 | 375.8 | 5     | 0  | 1 |
| A0A0B4J291 | Chromodoma  | 1.97238659   | 1 | 1 | 1 | 56.5  | 8.79  | 27 | 1 |
| Q9HCCO     | Methylcro   | 2.48667851   | 1 | 1 | 1 | 61.3  | 7.68  | 30 | 1 |
| Q9NPF4     | Probable tF | 4.7761194    | 1 | 1 | 1 | 36.4  | 6.35  | 0  | 1 |
| Q9P2P6     | StAR-relat  | 0.14893617   | 1 | 1 | 1 | 516   | 6.32  | 36 | 1 |
| O75794     | Cell divisi | 2.08333333   | 1 | 1 | 1 | 39.1  | 4.81  | 36 | 1 |
| Q9UJX4     | Anaphase-p  | 1.45695364   | 1 | 1 | 1 | 85    | 6.87  | 24 | 1 |
| Q99622     | Protein C1  | 14.2857143   | 1 | 1 | 1 | 13.2  | 5.14  | 25 | 1 |
| P82914     | 28S riboso  | 3.50194553   | 1 | 1 | 1 | 29.8  | 10.48 | 29 | 1 |
| Q04206     | Transcript  | 2.54083485   | 1 | 1 | 1 | 60.2  | 5.68  | 0  | 1 |
| Q96DV4     | 39S riboso  | 5.78947368   | 1 | 1 | 1 | 44.6  | 7.53  | 0  | 1 |
| B2RDG1     | Fatty acyl- | 2.33009709   | 1 | 1 | 1 | 59.3  | 9.17  | 20 | 1 |
| K7ELG9     | Protein LSM | 4.7826087    | 1 | 1 | 1 | 24.9  | 7.42  | 0  | 1 |
| O15321     | Transmembr  | 1.81518152   | 1 | 1 | 1 | 68.8  | 7.17  | 0  | 1 |
| Q969U7     | Proteasome  | 4.54545455   | 1 | 1 | 1 | 29.4  | 6.98  | 0  | 1 |
| Q53H37     | Calmodulin  | -9.5890411   | 1 | 1 | 1 | 15.9  | 4.44  | 20 | 1 |
| O95487     | Protein tr  | 1.02523659   | 1 | 1 | 1 | 137.3 | 6.67  | 24 | 1 |
| B2R6A9     | cDNA, FLJ9  | 2.05755396   | 1 | 1 | 1 | 61.8  | 8.66  | 0  | 1 |
| Q53F62     | ADP-ribosy  | 18.37438424  | 1 | 1 | 1 | 44.6  | 5.44  | 0  | 1 |
| B4DN86     | cDNA FLJ56  | 1.7989418    | 1 | 1 | 1 | 101.4 | 5     | 0  | 1 |
| E7ESA6     | Focal adhe  | :0.91240876  | 1 | 1 | 1 | 124   | 6.62  | 0  | 1 |
| Q9UMX5     | Neudesin O  | 5.23255814   | 1 | 1 | 1 | 18.8  | 5.69  | 26 | 1 |
| Q8NCR1     | VPS53 prote | 9.375        | 1 | 1 | 1 | 14.3  | 9.74  | 0  | 1 |
| Q14473     | Uncharacter | 5.71428571   | 1 | 1 | 1 | 18.9  | 6.79  | 0  | 1 |
| Q5QPA5     | 39S riboso  | 4.18250951   | 1 | 1 | 1 | 29.6  | 10.7  | 34 | 1 |
| Q5VW26     | Nuclear fac | 1.92982456   | 1 | 1 | 1 | 63.4  | 8.66  | 29 | 1 |
| P78316     | Nucleolar r | 2.33372229   | 1 | 1 | 1 | 97.6  | 7.58  | 0  | 1 |
| B4DM85     | Kinesin-li  | 2.28494624   | 1 | 1 | 1 | 84    | 6.47  | 30 | 1 |
| Q9Y6K0     | Choline/et  | 1.64423077   | 1 | 1 | 1 | 46.5  | 8.21  | 29 | 1 |
| P15408     | Fos-relate  | 9.20245399   | 1 | 1 | 1 | 35.2  | 7.49  | 0  | 1 |
| Q8IYL3     | UPF0688 pr  | 5.76131687   | 1 | 1 | 1 | 26    | 6.9   | 19 | 1 |
| A0A024RCR2 | Guanine nuc | 2.80065898   | 1 | 1 | 1 | 68.6  | 5.8   | 26 | 1 |
| Q9HD45     | Transmembr  | 1.86757216   | 1 | 1 | 1 | 67.8  | 7.21  | 26 | 1 |
| Q99943     | I-acyl-sn   | -3.18021201  | 1 | 1 | 1 | 31.7  | 9.38  | 32 | 1 |
| P25490     | Transcript  | 1.69082126   | 1 | 1 | 1 | 44.7  | 6.25  | 47 | 1 |
| E7EV27     | Copine-1    | 056.52173913 | 1 | 1 | 1 | 15.2  | 6.54  | 47 | 1 |
| B8ZZ87     | Mitotic-spi | 10.0917431   | 1 | 1 | 1 | 22.3  | 10.15 | 24 | 1 |
| A0A024R3M1 | Thymocyte   | r3.11111111  | 1 | 1 | 1 | 25.7  | 9.25  | 0  | 1 |
| Q9UJA5     | tRNA (adeni | 1.4084507    | 1 | 1 | 1 | 55.8  | 7.55  | 51 | 1 |
| O75947     | ATP syntha  | :13.0434783  | 1 | 1 | 1 | 18.5  | 5.3   | 19 | 1 |
| Q59ET9     | Mevalonate  | 4.98812352   | 1 | 2 | 1 | 44.7  | 6.6   | 0  | 1 |
| B2RCM6     | cDNA, FLJ9  | 8.30039526   | 1 | 1 | 1 | 28.2  | 9.54  | 0  | 1 |
| Q86UK7     | E3 ubiquiti | 0.99557522   | 1 | 1 | 1 | 98.6  | 8.4   | 19 | 1 |
| O94888     | UBX domain  | -2.86298569  | 1 | 1 | 1 | 54.8  | 5.16  | 25 | 1 |
| Q92575     | UBX domain  | -4.13385827  | 1 | 1 | 1 | 56.7  | 6.38  | 21 | 1 |
| Q7Z7E8     | Ubiquitin-c | 1.8957346    | 1 | 1 | 1 | 46.1  | 5.1   | 41 | 1 |
| Q9P031     | Thyroid tr  | :4.56431535  | 1 | 1 | 1 | 28.7  | 9.88  | 0  | 1 |
| Q9BTY7     | Protein HGF | 2.56410256   | 1 | 1 | 1 | 42.1  | 4.81  | 39 | 1 |

|            |               |              |   |   |   |       |       |    |   |
|------------|---------------|--------------|---|---|---|-------|-------|----|---|
| AOA0S2Z5P2 | GINS complex  | 3.1372549    | 1 | 1 | 1 | 28.8  | 5.24  | 31 | 1 |
| Q53YP0     | PreS1 binding | 1.25523013   | 1 | 1 | 1 | 54.4  | 10.36 | 48 | 1 |
| AOA0S2Z5C3 | PAK1 inter    | 2.04081633   | 1 | 1 | 1 | 43.9  | 8.91  | 28 | 1 |
| O15047     | Histone-lys   | 0.7029877    | 1 | 1 | 1 | 185.9 | 5.14  | 0  | 1 |
| B4DDJ5     | Macrophage    | 5.75692964   | 1 | 2 | 1 | 51.7  | 6.14  | 0  | 1 |
| AOA024R978 | Chromosome    | 2.69396552   | 1 | 1 | 1 | 103.1 | 4.78  | 0  | 1 |
| AOA0C4DFX9 | Negative el   | 1.85528757   | 1 | 1 | 1 | 58.5  | 9.26  | 35 | 1 |
| Q9BUR4     | Telomerase    | 3.28467153   | 1 | 1 | 1 | 59.3  | 4.58  | 32 | 1 |
| Q92905     | COP9 signal   | 2.99401198   | 1 | 1 | 1 | 37.6  | 6.54  | 32 | 1 |
| Q86WQ0     | Nuclear rec   | 8.63309353   | 1 | 1 | 1 | 15.9  | 6.16  | 0  | 1 |
| Q6NX51     | Exocyst con   | 1.64271047   | 1 | 1 | 1 | 110.4 | 6.49  | 29 | 1 |
| Q9BTX1     | Nucleoporin   | 3.115727     | 1 | 1 | 1 | 76.3  | 9.09  | 30 | 1 |
| Q9NQ50     | 39S ribosom   | 9.22330097   | 1 | 1 | 1 | 24.5  | 9.63  | 17 | 1 |
| Q9NSI2     | Protein FA    | 3.47826087   | 1 | 1 | 1 | 25.4  | 11.08 | 0  | 1 |
| O75880     | Protein SC    | 5.31561462   | 1 | 1 | 1 | 33.8  | 8.88  | 0  | 1 |
| H7C1N3     | BET1 homol    | 8.27067669   | 1 | 1 | 1 | 15    | 8.28  | 0  | 1 |
| Q9NV56     | MRG/MORF4     | -6.37254902  | 1 | 1 | 1 | 22.4  | 5.83  | 31 | 1 |
| Q05DF2     | SF3A2 prote   | 2.07900208   | 1 | 1 | 1 | 51.4  | 10.11 | 0  | 1 |
| Q9BXI6     | TBC1 domai    | 5.90551181   | 1 | 2 | 1 | 57.1  | 8.44  | 0  | 1 |
| Q8TCB0     | Interferon    | -1.57657658  | 1 | 1 | 1 | 50.5  | 6.89  | 36 | 1 |
| P22830     | Ferrocyclat   | 3.54609929   | 1 | 1 | 1 | 47.8  | 8.73  | 0  | 1 |
| Q8N884     | Cyclic GMP    | -1.91570881  | 1 | 1 | 1 | 58.8  | 9.48  | 0  | 1 |
| AOA024RDG6 | Scavenger     | 13.76569038  | 1 | 1 | 1 | 54.3  | 5.14  | 25 | 1 |
| P07858     | Cathepsin F   | 2.35988201   | 1 | 1 | 1 | 37.8  | 6.3   | 31 | 1 |
| O43815     | Striatin O    | 2.56410256   | 1 | 1 | 1 | 86.1  | 5.27  | 0  | 1 |
| Q6IBS0     | Twinfilin     | -4.58452722  | 1 | 1 | 1 | 39.5  | 6.84  | 21 | 1 |
| A8K1F4     | cDNA FLJ7     | 8.4.83870968 | 1 | 1 | 1 | 28.1  | 6.9   | 17 | 1 |
| Q6DD87     | Zinc finger   | 3.13315927   | 1 | 1 | 1 | 40.5  | 7.84  | 24 | 1 |
| Q9H098     | Protein FA    | 13.740458    | 1 | 1 | 1 | 15.5  | 8.29  | 28 | 1 |
| B3KW34     | Protein YII   | 3.50194553   | 1 | 1 | 1 | 28    | 4.36  | 0  | 1 |
| Q96ST3     | Paired amp    | 0.78554595   | 1 | 1 | 1 | 145.1 | 7.25  | 20 | 1 |
| AOA0S2Z5S7 | MIF4G domai   | 8.36501901   | 1 | 1 | 1 | 30.1  | 5.27  | 0  | 1 |
| B9A6K8     | TBC1 domai    | 1.04         | 1 | 1 | 1 | 140.4 | 5.24  | 0  | 1 |
| Q24JP5     | Transmembr    | 0.97751711   | 1 | 1 | 1 | 110   | 5.62  | 0  | 1 |
| Q8N5G0     | Small inte    | 20.8955224   | 1 | 1 | 1 | 7.7   | 9.86  | 0  | 1 |
| Q96IZ6     | Methyltran    | 4.23280423   | 1 | 1 | 1 | 43.5  | 6.01  | 0  | 1 |
| Q30201     | Hereditary    | 4.02298851   | 1 | 1 | 1 | 40.1  | 6.6   | 28 | 1 |
| AOA0B4J203 | Uncharacter   | 2.23792697   | 1 | 1 | 1 | 94.6  | 4.96  | 32 | 1 |
| Q8TAE8     | Growth arr    | 4.95495495   | 1 | 1 | 1 | 25.4  | 10.02 | 0  | 1 |
| Q9P2I0     | Cleavage ar   | 2.55754476   | 1 | 1 | 1 | 88.4  | 5.11  | 15 | 1 |
| Q6P1A2     | Lysophosph    | 2.05338809   | 1 | 1 | 1 | 56    | 8.69  | 23 | 1 |
| B2RB38     | cDNA, FLJ     | 9.3.42342342 | 1 | 1 | 1 | 59.9  | 5.97  | 18 | 1 |
| H3BMD8     | cAMP-regul    | 19.8473282   | 1 | 1 | 1 | 14.5  | 8.31  | 0  | 1 |
| Q96K76     | Ubiquitin     | 1.01818182   | 1 | 1 | 1 | 157.2 | 5.08  | 0  | 1 |
| Q9Y3A6     | Transmembr    | 3.05676856   | 1 | 1 | 1 | 26    | 4.84  | 46 | 1 |
| Q6NTG0     | SLC9A3R2 p    | 3.76344086   | 1 | 1 | 1 | 40.6  | 8.13  | 0  | 1 |
| Q9NX46     | Poly(ADP-ri   | 2.47933884   | 1 | 1 | 1 | 38.9  | 5.07  | 36 | 1 |
| Q9H3H9     | Transcripti   | 3.96475771   | 1 | 1 | 1 | 25.8  | 5.94  | 0  | 1 |
| Q8NCF5     | NFATC2-int    | 4.05727924   | 1 | 1 | 1 | 45.8  | 6.6   | 0  | 1 |
| O95983     | Methyl-Cp     | -5.15463918  | 1 | 1 | 1 | 32.8  | 5.34  | 0  | 1 |
| Q8WXF1     | Paraspeckl    | 6.11854685   | 1 | 1 | 1 | 58.7  | 6.67  | 0  | 1 |
| O43299     | AP-5 comple   | 1.73482032   | 1 | 1 | 1 | 88.5  | 7.01  | 0  | 1 |
| B2R7D2     | cDNA, FLJ     | 9.2.87474333 | 1 | 1 | 1 | 55.1  | 7.97  | 0  | 1 |
| AOA0AOMT33 | Protein SC    | 0.88954781   | 1 | 1 | 1 | 148.8 | 9.06  | 0  | 1 |
| Q8TDY2     | RBI-inducit   | 0.94102886   | 1 | 2 | 1 | 183   | 5.41  | 0  | 1 |
| HOY5K5     | Endoplasmic   | 2.01511335   | 1 | 1 | 1 | 44.6  | 6.47  | 24 | 1 |
| Q9UK59     | Lariat debi   | 1.83823529   | 1 | 1 | 1 | 61.5  | 5.47  | 21 | 1 |
| Q8NFF5     | FAD synthas   | 3.57751278   | 1 | 1 | 1 | 65.2  | 6.93  | 24 | 1 |
| F8VZG9     | RNA-binding   | 2.14592275   | 1 | 1 | 1 | 50.5  | 6.1   | 30 | 1 |
| E7EQY1     | Protein FA    | 5.30612245   | 1 | 1 | 1 | 26.8  | 8.24  | 27 | 1 |
| Q9HCG8     | Pre-mRNA-s    | 1.21145374   | 1 | 1 | 1 | 105.4 | 7.03  | 0  | 1 |
| P62891     | 60S ribosom   | 19.6078431   | 1 | 1 | 1 | 6.4   | 12.56 | 23 | 1 |
| O95159     | Zinc finger   | 2.58064516   | 1 | 1 | 1 | 34.1  | 8.07  | 0  | 1 |
| O15198     | Mothers ag    | 2.78372591   | 1 | 1 | 1 | 52.5  | 7.77  | 0  | 1 |
| Q7LBR1     | Charged mul   | 4.0201005    | 1 | 1 | 1 | 22.1  | 8.1   | 26 | 1 |
| Q5T200     | Zinc finger   | 0.59952038   | 1 | 1 | 1 | 196.5 | 9.42  | 0  | 1 |
| P57772     | Selenocyst    | 2.68456376   | 1 | 1 | 1 | 65.3  | 8.35  | 26 | 1 |
| Q59HD5     | 3-mercapto    | 2.86624204   | 1 | 1 | 1 | 34.7  | 7.24  | 32 | 1 |
| AOA087WXL6 | Vacuolar p    | 0.74388948   | 1 | 1 | 1 | 107.7 | 7.05  | 33 | 1 |
| Q5JRC9     | Protein FA    | 0.7585335    | 1 | 1 | 1 | 90.5  | 9.11  | 46 | 1 |
| Q8WVG6     | MAP kinase    | -1.39647845  | 1 | 1 | 1 | 183.2 | 6.04  | 0  | 1 |
| Q9NYK5     | 39S ribosom   | 2.07100592   | 1 | 1 | 1 | 38.7  | 7.65  | 33 | 1 |
| Q86SK1     | Putative ur   | 20.8092486   | 1 | 2 | 1 | 19.7  | 8.13  | 0  | 1 |

|            |             |              |   |   |   |       |       |    |   |
|------------|-------------|--------------|---|---|---|-------|-------|----|---|
| Q9HC98     | Serine/thr  | 2.55591054   | 1 | 1 | 1 | 35.7  | 8.03  | 0  | 1 |
| Q9BSH4     | Translatior | 6.06060606   | 1 | 1 | 1 | 32.5  | 8.13  | 0  | 1 |
| Q5STK2     | Prefoldin   | :9.30232558  | 1 | 1 | 1 | 14.6  | 8.88  | 0  | 1 |
| Q9UPT8     | Zinc finger | 0.69071374   | 1 | 1 | 1 | 140.2 | 6.27  | 0  | 1 |
| O43427     | Acidic fibr | 2.74725275   | 1 | 1 | 1 | 41.9  | 6.48  | 21 | 1 |
| Q96EB6     | NAD-depend  | 2.27576975   | 1 | 1 | 1 | 81.6  | 4.67  | 25 | 1 |
| Q9HC52     | Chromobox   | r4.88431877  | 1 | 1 | 1 | 43.4  | 9.91  | 0  | 1 |
| B4DGM9     | Torsin fami | 3.57142857   | 1 | 1 | 1 | 40.8  | 7.99  | 23 | 1 |
| P48651     | Phosphatid  | 2.74841438   | 1 | 1 | 1 | 55.5  | 8.43  | 0  | 1 |
| Q5U676     | Galactosyl  | 2.34604106   | 1 | 1 | 1 | 37.8  | 8.62  | 0  | 1 |
| Q8N5R6     | Coiled-coil | 0.73068894   | 1 | 1 | 1 | 107.1 | 6.77  | 0  | 1 |
| O95630     | STAM-bindir | 3.06603774   | 1 | 1 | 1 | 48    | 6.29  | 0  | 1 |
| O14530     | Thioredoxin | 4.86725664   | 1 | 1 | 1 | 26.5  | 5.88  | 26 | 1 |
| B0QYD3     | DNA dC->dU  | -2.24489796  | 1 | 1 | 1 | 57.2  | 6.81  | 38 | 1 |
| Q9UJX6     | Anaphase-p  | 0.85158151   | 1 | 1 | 1 | 93.8  | 5.22  | 41 | 1 |
| Q7Z4X0     | MO25-like   | r2.05278592  | 1 | 1 | 1 | 39.7  | 7.47  | 36 | 1 |
| B4DMQ1     | cDNA FLJ61  | 1.48698885   | 1 | 1 | 1 | 62.5  | 5.31  | 0  | 1 |
| Q9UHG3     | Prenylcyste | 2.57425743   | 1 | 1 | 1 | 56.6  | 6.18  | 20 | 1 |
| B2RE74     | cDNA, FLJ9  | 4.43786982   | 1 | 1 | 1 | 36.8  | 6.68  | 0  | 1 |
| Q00587     | Cdc42 effec | 4.60358056   | 1 | 1 | 1 | 40.3  | 7.15  | 0  | 1 |
| AOA096LPI6 | Uncharacter | 4.65949821   | 1 | 1 | 1 | 30.5  | 7.87  | 0  | 1 |
| Q99614     | Tetratricor | 6.84931507   | 1 | 1 | 1 | 33.5  | 4.84  | 0  | 1 |
| P61927     | 60S ribosom | 6.18556701   | 1 | 1 | 1 | 11.1  | 11.74 | 41 | 1 |
| Q8NC44     | Protein FAM | 4.60405157   | 1 | 1 | 1 | 57.8  | 4.45  | 0  | 1 |
| F8VX04     | Sodium-cou  | p1.59045726  | 1 | 1 | 1 | 56.2  | 7.69  | 0  | 1 |
| O60725     | Protein-S-i | 3.16901408   | 1 | 1 | 1 | 31.9  | 7.96  | 33 | 1 |
| B1PBA3     | SKNY protei | 2.19399538   | 1 | 1 | 1 | 97.7  | 8.27  | 0  | 1 |
| Q0P5W4     | RCE1 protei | 4.25531915   | 1 | 1 | 1 | 35.3  | 9.19  | 0  | 1 |
| Q9UKR5     | Probable ei | 10.7142857   | 1 | 1 | 1 | 15.9  | 9.83  | 0  | 1 |
| Q14691     | DNA replic  | 7.14285714   | 1 | 1 | 1 | 23    | 7.39  | 0  | 1 |
| P07711     | Cathepsin I | 3.6036036    | 1 | 1 | 1 | 37.5  | 5.45  | 23 | 1 |
| B9ZVT1     | RNA-binding | 4.54029512   | 1 | 1 | 1 | 102.6 | 7.53  | 21 | 1 |
| Q9Y2W2     | WW domain   | -t1.5600624  | 1 | 1 | 1 | 70    | 8.38  | 36 | 1 |
| Q8N4Q0     | Prostaglan  | 3.97877984   | 1 | 1 | 1 | 40.1  | 8.18  | 0  | 1 |
| A2A2Q9     | Protein AAF | 4.0201005    | 1 | 1 | 1 | 45    | 7.46  | 0  | 1 |
| AOA024R6N2 | CDC42 bindi | 0.58445354   | 1 | 1 | 1 | 194.2 | 6.37  | 33 | 1 |
| AOA0S2Z3W7 | Nucleotide  | 4.12371134   | 1 | 1 | 1 | 21.4  | 5.66  | 32 | 1 |
| Q86W50     | Methyltran  | 1.42348754   | 1 | 1 | 1 | 63.6  | 7.85  | 31 | 1 |
| AOA024R7I0 | GIPC PDZ d  | c5.10510511  | 1 | 1 | 1 | 36    | 6.28  | 0  | 1 |
| Q2TAC6     | Kinesin-li  | 0.6012024    | 1 | 1 | 1 | 111.3 | 8.69  | 0  | 1 |
| K7ENL6     | Fas-binding | 0.61028771   | 1 | 1 | 1 | 126.8 | 6.7   | 36 | 1 |
| B2RDX7     | cDNA, FLJ9  | 2.96296296   | 1 | 1 | 1 | 59.7  | 7.66  | 0  | 1 |
| Q96AY2     | Crossover   | .2.10526316  | 1 | 1 | 1 | 63.2  | 7.05  | 15 | 1 |
| B1ANH3     | Guanylate   | 14.04411765  | 1 | 1 | 1 | 30.1  | 6.68  | 0  | 1 |
| B3KUL5     | Oxysterol   | -t1.30890052 | 1 | 1 | 1 | 83.9  | 8.31  | 27 | 1 |
| Q1MSJ5     | Centrosome  | 0.71656051   | 1 | 1 | 1 | 145.4 | 6.8   | 28 | 1 |
| Q15031     | Probable l  | e1.10741971  | 1 | 1 | 1 | 101.9 | 8.22  | 24 | 1 |
| Q86UY6     | N-alpha-ac  | c5.06329114  | 1 | 1 | 1 | 27.2  | 7.39  | 0  | 1 |
| O95551     | Tyrosyl-DN  | 2.48618785   | 1 | 1 | 1 | 40.9  | 5.1   | 36 | 1 |
| Q96BW9     | Phosphatid  | 4.42477876   | 1 | 1 | 1 | 51    | 7.94  | 0  | 1 |
| Q9NR50     | Translatior | 1.99115044   | 1 | 1 | 1 | 50.2  | 6.47  | 33 | 1 |
| Q9BPZ3     | Polyadenyl  | 23.6220472   | 1 | 1 | 1 | 15    | 4.12  | 0  | 1 |
| AOA024R136 | Rac GTPase  | 1.26582278   | 1 | 1 | 1 | 71    | 8.88  | 28 | 1 |
| B2R4C9     | cDNA, FLJ9  | 7.84313725   | 1 | 1 | 1 | 11.2  | 9.52  | 42 | 1 |
| B2R8N1     | cDNA, FLJ9  | 10.0478469   | 1 | 1 | 1 | 23.2  | 5.38  | 0  | 1 |
| Q69YN4     | Protein vii | 1.04856512   | 1 | 1 | 1 | 201.9 | 5.01  | 0  | 1 |
| Q9NYV6     | RNA polymer | 1.68970814   | 1 | 1 | 1 | 74.1  | 5.63  | 26 | 1 |
| Q9BUV8     | Uncharacter | 4.37956204   | 1 | 1 | 1 | 15.5  | 5.2   | 34 | 1 |
| H7BYT1     | Casein kin  | 3.27868852   | 1 | 1 | 1 | 49    | 9.94  | 0  | 1 |
| B2RDV7     | tRNA-dihyd  | 3.38461538   | 1 | 1 | 1 | 72.6  | 8.05  | 0  | 1 |
| Q53HJ8     | PKCI-1-rel  | 12.2699387   | 1 | 1 | 1 | 17.2  | 9.48  | 0  | 1 |
| Q6PGP7     | Tetratricor | 0.70332481   | 1 | 1 | 1 | 175.4 | 7.53  | 0  | 1 |
| B2R6X2     | Beta-glucou | 1.22887865   | 1 | 1 | 1 | 74.7  | 7.02  | 28 | 1 |
| B2R4Q7     | Mitochondri | 7.87401575   | 1 | 1 | 1 | 14.3  | 10.43 | 21 | 1 |
| A6NGQ3     | Obscurin    | 05.0.1681049 | 1 | 1 | 1 | 972.4 | 5.99  | 0  | 1 |
| O14657     | Torsin-1B   | (2.08333333  | 1 | 1 | 1 | 38    | 8.54  | 27 | 1 |
| Q6IBW4     | Condensin   | -1.32231405  | 1 | 1 | 1 | 68.2  | 4.74  | 0  | 1 |
| O14924     | Regulator   | c1.65860401  | 1 | 1 | 1 | 156.3 | 7.44  | 0  | 1 |
| AOA024R1M5 | Zinc finger | 0.87336245   | 1 | 1 | 1 | 74    | 8.35  | 41 | 1 |
| B2R841     | Serine/thr  | c2.81923715  | 1 | 1 | 1 | 68.2  | 8.91  | 0  | 1 |
| Q9UNZ5     | Leydig cell | 17.07070707  | 1 | 1 | 1 | 10.6  | 11.55 | 40 | 1 |
| Q9UL49     | Transcripti | 3.4          | 1 | 1 | 1 | 52.7  | 6.84  | 0  | 1 |
| Q9UBZ4     | DNA-(apurir | 3.08880309   | 1 | 1 | 1 | 57.4  | 8.29  | 21 | 1 |

|            |                  |              |   |   |   |       |       |    |   |
|------------|------------------|--------------|---|---|---|-------|-------|----|---|
| Q6LAP8     | Mitochondri      | 2.83018868   | 1 | 1 | 1 | 34.8  | 9.89  | 35 | 1 |
| A0A0U1RRH6 | PHD finger       | 2.74261603   | 1 | 1 | 1 | 106.9 | 5.34  | 0  | 1 |
| V9HW87     | Abhydrolase      | 10.4761905   | 1 | 1 | 1 | 22.3  | 6.4   | 0  | 1 |
| Q9H201     | Epsin-3 OS       | 1.89873418   | 1 | 1 | 1 | 68.2  | 5.91  | 21 | 1 |
| Q9H9Y2     | Ribosome p18     | 3.0945559    | 1 | 1 | 1 | 40.1  | 10.01 | 0  | 1 |
| Q8IUR7     | Armadillo 1      | 1.33729569   | 1 | 1 | 1 | 75.5  | 6.73  | 29 | 1 |
| Q9H8H2     | Probable A11     | 0.05757932   | 1 | 1 | 1 | 94    | 9.99  | 20 | 1 |
| P61225     | Ras-related      | 6.55737705   | 1 | 1 | 1 | 20.5  | 4.81  | 32 | 1 |
| B2R680     | Signal trar      | 1.18063754   | 1 | 1 | 1 | 94.1  | 6.23  | 0  | 1 |
| A0A024R7X0 | ADP-ribosyl      | 0.97349919   | 1 | 1 | 1 | 208.6 | 5.85  | 0  | 1 |
| O95067     | G2/mitotic       | 2.26130653   | 1 | 1 | 1 | 45.3  | 8.9   | 19 | 1 |
| V9HWG3     | Epididymis       | 1.16448326   | 1 | 1 | 1 | 77.3  | 5.22  | 0  | 1 |
| P13051     | Uracil-DNA       | 7.66773163   | 1 | 1 | 1 | 34.6  | 9.32  | 0  | 1 |
| Q53T59     | HCLS1-bind       | 4.84693878   | 1 | 1 | 1 | 42.8  | 5.01  | 34 | 1 |
| Q8N1G2     | Cap-specifi      | 0.83832335   | 1 | 1 | 1 | 95.3  | 7.05  | 0  | 1 |
| Q9NPL8     | Complex I        | 5.61403509   | 1 | 1 | 1 | 32.2  | 8.5   | 0  | 1 |
| Q13202     | Dual specifi     | 0.096        | 1 | 1 | 1 | 65.8  | 8.24  | 41 | 1 |
| A0A024QZR3 | Protein pell     | 1.55844156   | 1 | 1 | 1 | 43.4  | 6.34  | 0  | 1 |
| B2RCC8     | cDNA, FLJ9       | 2.03106332   | 1 | 1 | 1 | 94.4  | 7.97  | 0  | 1 |
| Q5TGZ0     | MICOS comp       | 18.97435897  | 1 | 1 | 1 | 8.8   | 8.5   | 39 | 1 |
| Q15906     | Vacuolar p       | 2.1978022    | 1 | 1 | 1 | 40.6  | 6.48  | 24 | 1 |
| MOR0I8     | F-box only       | 13           | 1 | 2 | 1 | 10.8  | 7.83  | 0  | 1 |
| B3KV46     | cDNA FLJ1        | 613.74331551 | 1 | 1 | 1 | 21.6  | 7.97  | 35 | 1 |
| Q96ST2     | Protein IW       | 1.46520147   | 1 | 1 | 1 | 91.9  | 4.69  | 0  | 1 |
| Q17RC7     | Exocyst con      | 1.10803324   | 1 | 1 | 1 | 79.8  | 6.32  | 0  | 1 |
| Q13421     | Mesothelin       | 2.22222222   | 1 | 1 | 1 | 68.9  | 6.38  | 0  | 1 |
| Q9Y2D0     | Carbonic ar      | 2.83911672   | 1 | 1 | 1 | 36.4  | 7.81  | 0  | 1 |
| A0A024R9E4 | Mal, T-cell      | 6.25         | 1 | 1 | 1 | 19.1  | 6.24  | 0  | 1 |
| O14681     | Etoposide-i      | 2.35294118   | 1 | 1 | 1 | 38.9  | 9.72  | 30 | 1 |
| P03891     | NADH-ubiqui      | 2.59365994   | 1 | 1 | 1 | 38.9  | 9.83  | 30 | 1 |
| P13498     | Cytochrome       | 5.12820513   | 1 | 1 | 1 | 21    | 9.54  | 0  | 1 |
| Q96C86     | m7GpppX di       | 5.6379822    | 1 | 1 | 1 | 38.6  | 6.38  | 20 | 1 |
| Q9UHW9     | Solute car       | 0.95652174   | 1 | 1 | 1 | 127.5 | 7.08  | 0  | 1 |
| P34949     | Mannose-6- $\pi$ | 4.96453901   | 1 | 1 | 1 | 46.6  | 5.95  | 0  | 1 |
| Q8IYI6     | Exocyst con      | 1.93103448   | 1 | 1 | 1 | 81.7  | 5.49  | 28 | 1 |
| Q9BRF8     | Serine/thre      | 3.50318471   | 1 | 1 | 1 | 35.5  | 6.2   | 0  | 1 |
| J3KQ47     | Protein unc      | 7.24637681   | 1 | 1 | 1 | 32.4  | 9.64  | 0  | 1 |
| J3QR07     | YTH domain       | 1.63265306   | 1 | 1 | 1 | 85.5  | 6.23  | 0  | 1 |
| Q9NVC6     | Mediator of      | 3.68663594   | 1 | 1 | 1 | 72.8  | 7.44  | 0  | 1 |
| MOR0J1     | Pleckstrin       | 9.95024876   | 1 | 1 | 1 | 21.9  | 10.52 | 0  | 1 |
| Q9BYN8     | 28S ribosom      | 3.41463415   | 1 | 1 | 1 | 24.2  | 10.39 | 0  | 1 |
| Q9H553     | Alpha-1, 3/1     | 2.88461538   | 1 | 1 | 1 | 47.1  | 7.05  | 0  | 1 |
| H3BM74     | NEDD8 ultin      | 1.87793427   | 1 | 1 | 1 | 73.3  | 6.57  | 18 | 1 |
| Q9UKE5     | TRAF2 and        | 0.51470588   | 1 | 1 | 1 | 154.8 | 7.17  | 31 | 1 |
| Q9GZS3     | WD repeat-c      | 5.57377049   | 1 | 1 | 1 | 33.6  | 5.47  | 18 | 1 |
| HOUI80     | Negative el      | 2.67111853   | 1 | 1 | 1 | 67.3  | 5.21  | 0  | 1 |
| O95070     | Protein YIF      | 5.11945392   | 1 | 1 | 1 | 32    | 8.95  | 0  | 1 |
| Q96IZ0     | PRKC apopt       | 5            | 1 | 1 | 1 | 36.5  | 5.41  | 0  | 1 |
| J3KMZ8     | Zinc finger      | 2.22222222   | 1 | 1 | 1 | 45.8  | 6.98  | 23 | 1 |
| Q5VTL8     | Pre-mRNA-s       | 7.50915751   | 1 | 1 | 1 | 64.4  | 10.54 | 0  | 1 |
| Q06136     | 3-ketodihy       | 3.31325301   | 1 | 1 | 1 | 36.2  | 7.12  | 0  | 1 |
| Q9POU1     | Mitochondri      | 30.9090909   | 1 | 1 | 1 | 6.2   | 10.29 | 21 | 1 |
| Q9Y6N1     | Cytochrome       | 3.62318841   | 1 | 1 | 1 | 31.4  | 9.06  | 0  | 1 |
| Q6ZRP7     | Sulfhydryl       | 2.29226361   | 1 | 1 | 1 | 77.5  | 7.72  | 0  | 1 |
| Q9NYL2     | Mitogen-act      | 1.75         | 1 | 1 | 1 | 91.1  | 7.87  | 0  | 1 |
| B7ZKS3     | Ubiquitin        | 0.77294686   | 1 | 1 | 1 | 118.9 | 6     | 0  | 1 |
| A0A0D9SG36 | Protein FAM      | 6.57894737   | 1 | 1 | 1 | 34.7  | 8.66  | 0  | 1 |
| Q03468     | DNA excisic      | 1.00468855   | 1 | 1 | 1 | 168.3 | 8.09  | 0  | 1 |
| Q8TB36     | Ganglioside      | 4.18994413   | 1 | 1 | 1 | 41.3  | 8.34  | 0  | 1 |
| Q9BPU6     | Dihydropyri      | 2.4822695    | 1 | 1 | 1 | 61.4  | 7.2   | 0  | 1 |
| X6R7U9     | Guanine nuc      | 0.83333333   | 1 | 1 | 1 | 74.2  | 5.05  | 26 | 1 |
| P62304     | Small nucle      | 11.9565217   | 1 | 1 | 1 | 10.8  | 9.44  | 22 | 1 |
| Q8N2F6     | Armadillo 1      | 4.66472303   | 1 | 1 | 1 | 37.5  | 6.61  | 20 | 1 |
| F2Z2W7     | tRNA (uraci      | 2.95489891   | 1 | 1 | 1 | 70.8  | 8.05  | 0  | 1 |
| Q6UVJ0     | Spindle asc      | 1.52207002   | 1 | 1 | 1 | 74.4  | 7.55  | 0  | 1 |
| P82912     | 28S ribosom      | 5.67010309   | 1 | 1 | 1 | 20.6  | 10.81 | 0  | 1 |
| P15291     | Beta-1, 4-g      | 7.28643216   | 1 | 1 | 1 | 43.9  | 8.65  | 0  | 1 |
| Q5VIR6     | Vacuolar p       | 1.7167382    | 1 | 1 | 1 | 79.6  | 6.02  | 21 | 1 |
| A0A087WYN9 | ATP-depend       | 0.65693431   | 1 | 1 | 1 | 155.2 | 8.15  | 0  | 1 |
| O15525     | Transcripti      | 6.79012346   | 1 | 1 | 1 | 17.8  | 10.04 | 27 | 1 |
| Q9HAV7     | GrpE protei      | 5.06912442   | 1 | 1 | 1 | 24.3  | 8.12  | 0  | 1 |
| HOYN01     | Talin-2 OS       | 3.93939394   | 1 | 1 | 1 | 35.3  | 5.06  | 0  | 1 |
| P09110     | 3-ketoacyl       | 3.06603774   | 1 | 1 | 1 | 44.3  | 8.44  | 0  | 1 |

|            |                       |   |   |   |       |      |    |   |
|------------|-----------------------|---|---|---|-------|------|----|---|
| Q8NA68     | cdNA FLJ3573.77358491 | 1 | 1 | 1 | 42.8  | 9.51 | 0  | 1 |
| Q9NSG2     | Uncharacter1.64126612 | 1 | 1 | 1 | 96.5  | 6    | 26 | 1 |
| O14958     | Calsequest12.75689223 | 1 | 1 | 1 | 46.4  | 4.37 | 0  | 1 |
| B3KUB6     | cdNA FLJ391.42487047  | 1 | 1 | 1 | 86.4  | 5.81 | 0  | 1 |
| Q7Z4H1     | HBeAg-bind13.8211382  | 1 | 1 | 1 | 14    | 9.36 | 0  | 1 |
| O96011     | Peroxisoma13.47490347 | 1 | 1 | 1 | 28.4  | 9.85 | 25 | 1 |
| Q8NEP3     | Dynein ass1.37931034  | 1 | 1 | 1 | 80    | 4.67 | 0  | 1 |
| A8K2Q6     | Peptidyl-p16.13207547 | 1 | 1 | 1 | 22.7  | 8.4  | 22 | 1 |
| Q9P260     | LisH domair0.90460526 | 1 | 1 | 1 | 134.5 | 5.45 | 0  | 1 |
| O75935     | Dynactin st4.30107527 | 1 | 1 | 1 | 21.1  | 5.47 | 30 | 1 |
| P23434     | Glycine cl11.5606936  | 1 | 1 | 1 | 18.9  | 4.88 | 0  | 1 |
| P41229     | Lysine-spec0.64102564 | 1 | 1 | 1 | 175.6 | 5.58 | 0  | 1 |
| Q8WZ03     | Putative ur12.3809524 | 1 | 1 | 1 | 11    | 9.44 | 20 | 1 |
| A0A140VJR2 | Testicular 1.4198783  | 1 | 1 | 1 | 54.5  | 6    | 29 | 1 |
| O75420     | GRB10-inte1.25603865  | 1 | 1 | 1 | 114.5 | 5.39 | 26 | 1 |
| A8K6Q5     | cdNA FLJ77:3.40557276 | 1 | 1 | 1 | 37.6  | 7.15 | 0  | 1 |

Table S6 (e). Identified proteins by 8M UA

| Accession  | Description           | Coverage     | # Peptides | # PSMs | # Unique | PtMW [kDa] | calc. pI | Score | Mascot# | Peptides | Mascot |
|------------|-----------------------|--------------|------------|--------|----------|------------|----------|-------|---------|----------|--------|
| P21333     | Filamin-A             | (56.5545901  | 118        | 244    | 2        | 280.6      | 6.06     | 4848  |         | 118      |        |
| Q60FE5     | Filamin A             | (56.3358779  | 117        | 244    | 1        | 278.1      | 6.06     | 4812  |         | 117      |        |
| Q15149     | Plectin OS=40.        | 8838599      | 158        | 216    | 152      | 531.5      | 5.96     | 3869  |         | 158      |        |
| P49327     | Fatty acid            | 53.8430904   | 99         | 196    | 99       | 273.3      | 6.44     | 3657  |         | 99       |        |
| P35579     | Myosin-9 OS=54.       | 1836735      | 105        | 160    | 105      | 226.4      | 5.6      | 3927  |         | 105      |        |
| O75369     | Filamin-B             | (53.3435819  | 108        | 188    | 101      | 278        | 5.73     | 3402  |         | 108      |        |
| V9HWB8     | Pyruvate ki79.        | 6610169      | 41         | 241    | 41       | 57.9       | 7.84     | 5734  |         | 41       |        |
| Q1KLZ0     | HCG15971, i81.        | 0666667      | 36         | 304    | 1        | 41.7       | 5.48     | 7112  |         | 36       |        |
| P63261     | Actin, cytc81.        | 0666667      | 36         | 303    | 1        | 41.8       | 5.48     | 7120  |         | 36       |        |
| Q14204     | Cytoplasmic31.        | 0804994      | 116        | 145    | 116      | 532.1      | 6.4      | 2151  |         | 116      |        |
| Q09666     | Neuroblast 32.        | 6485569      | 105        | 154    | 105      | 628.7      | 6.15     | 1983  |         | 105      |        |
| P78527     | DNA-depende           | 32.630814    | 113        | 151    | 113      | 468.8      | 7.12     | 2386  |         | 113      |        |
| P07437     | Tubulin bet           | 84.009009    | 33         | 218    | 5        | 49.6       | 4.89     | 4419  |         | 33       |        |
| P08238     | Heat shock            | 60.359116    | 55         | 255    | 35       | 83.2       | 5.03     | 4612  |         | 55       |        |
| P04406     | Glyceralde            | 78.8059701   | 28         | 210    | 28       | 36         | 8.46     | 3745  |         | 28       |        |
| AOA087WVQ6 | Clathrin he           | 52.7099464   | 73         | 120    | 73       | 191.9      | 5.69     | 2476  |         | 73       |        |
| P07900     | Heat shock            | 57.1038251   | 53         | 254    | 35       | 84.6       | 5.02     | 4347  |         | 53       |        |
| AOA0G2JIW1 | Heat shock            | 63.7071651   | 44         | 157    | 7        | 70.1       | 5.66     | 3021  |         | 44       |        |
| P68371     | Tubulin bet           | 83.8202247   | 33         | 214    | 1        | 49.8       | 4.89     | 4398  |         | 33       |        |
| P06733     | Alpha-enol            | 75.5760369   | 38         | 176    | 28       | 47.1       | 7.39     | 4760  |         | 38       |        |
| P31327     | Carbamoyl- $\gamma$   | 60.0666667   | 74         | 133    | 72       | 164.8      | 6.74     | 2825  |         | 74       |        |
| P10809     | 60 kDa heat           | 71.2041885   | 44         | 147    | 44       | 61         | 5.87     | 3315  |         | 44       |        |
| V9HWB4     | Epididymis            | 57.0336391   | 43         | 166    | 40       | 72.3       | 5.16     | 4215  |         | 43       |        |
| P13639     | Elongation            | 65.967366    | 59         | 157    | 58       | 95.3       | 6.83     | 3132  |         | 59       |        |
| B4DWK5     | cDNA FLJ54            | 62.7608347   | 38         | 138    | 1        | 68         | 5.5      | 2632  |         | 38       |        |
| V9HVZ7     | Epididymis            | 79.8206278   | 24         | 207    | 1        | 25         | 5.66     | 5276  |         | 24       |        |
| P00558     | Phosphoglyc           | 85.8513189   | 36         | 144    | 36       | 44.6       | 8.1      | 3113  |         | 36       |        |
| P04350     | Tubulin bet           | 77.7027027   | 30         | 193    | 2        | 49.6       | 4.88     | 3738  |         | 30       |        |
| O43707     | Alpha-actin           | 66.5203074   | 53         | 104    | 37       | 104.8      | 5.44     | 2225  |         | 53       |        |
| Q9BVA1     | Tubulin bet           | 76.4044944   | 29         | 188    | 3        | 49.9       | 4.89     | 3644  |         | 29       |        |
| P04075     | Fructose-bi           | 88.7362637   | 31         | 130    | 27       | 39.4       | 8.09     | 2396  |         | 31       |        |
| P29401     | Transketol            | 69.6629213   | 38         | 111    | 38       | 67.8       | 7.66     | 2291  |         | 38       |        |
| V9HW22     | Epididymis            | 60.6811146   | 41         | 131    | 32       | 70.9       | 5.52     | 2741  |         | 41       |        |
| P68104     | Elongation            | 69.4805195   | 27         | 186    | 17       | 50.1       | 9.01     | 2896  |         | 27       |        |
| Q13813     | Spectrin al           | 36.6100324   | 63         | 80     | 63       | 284.4      | 5.35     | 1541  |         | 63       |        |
| P02545     | Prelamin-A,           | 69.126506    | 44         | 90     | 13       | 74.1       | 7.02     | 2257  |         | 44       |        |
| P22626     | Heterogene            | 70.5382436   | 30         | 102    | 26       | 37.4       | 8.95     | 2265  |         | 30       |        |
| AOA024RAZ7 | Heterogene            | 52.9569892   | 28         | 96     | 24       | 38.7       | 9.13     | 1682  |         | 28       |        |
| V9HWE1     | Epididymis            | 76.3948498   | 44         | 101    | 43       | 53.6       | 5.12     | 2292  |         | 44       |        |
| P05787     | Keratin, $\gamma$ 63. | 7681159      | 45         | 109    | 39       | 53.7       | 5.59     | 2307  |         | 45       |        |
| P58107     | Epiplakin             | (42.6129666  | 46         | 62     | 41       | 555.3      | 5.6      | 1585  |         | 46       |        |
| P26038     | Moesin OS=            | 63.9514731   | 47         | 98     | 34       | 67.8       | 6.4      | 2125  |         | 47       |        |
| V9HW80     | Epididymis            | 62.6550868   | 45         | 84     | 45       | 89.3       | 5.26     | 1567  |         | 45       |        |
| P12814     | Alpha-actin           | 55.8295964   | 43         | 82     | 27       | 103        | 5.41     | 1777  |         | 43       |        |
| P27708     | CAD proteir           | 37.5730337   | 59         | 81     | 57       | 242.8      | 6.46     | 1093  |         | 59       |        |
| P78371     | T-complex $\gamma$    | 69.7196262   | 34         | 66     | 34       | 57.5       | 6.46     | 1792  |         | 34       |        |
| E5KNY5     | Leucine-ric           | 43.3285509   | 54         | 72     | 54       | 157.8      | 6.13     | 1275  |         | 54       |        |
| P07814     | Bifunction            | 47.0238095   | 56         | 72     | 56       | 170.5      | 7.33     | 1116  |         | 56       |        |
| A4QPBO     | IQ motif c            | 40.5552203   | 48         | 63     | 48       | 189.2      | 6.48     | 1195  |         | 48       |        |
| AOA024R1A3 | Testicular            | 48.2041588   | 39         | 86     | 39       | 117.8      | 5.76     | 1542  |         | 39       |        |
| Q00839     | Heterogene            | 45.9393939   | 36         | 82     | 36       | 90.5       | 6        | 1487  |         | 36       |        |
| P19338     | Nucleolin             | (40.7042254  | 32         | 83     | 32       | 76.6       | 4.7      | 1911  |         | 32       |        |
| AOA087WUZ3 | Spectrin b            | 28.5714286   | 48         | 62     | 44       | 274.7      | 5.57     | 1204  |         | 48       |        |
| F5H5D3     | Tubulin al            | 56.4547206   | 29         | 122    | 12       | 57.7       | 5.07     | 2827  |         | 29       |        |
| AOA024R9W5 | HECT, UBA $\epsilon$  | 19.5701875   | 59         | 67     | 56       | 481.6      | 5.22     | 1050  |         | 59       |        |
| Q13509     | Tubulin bet           | 47.5555556   | 22         | 118    | 5        | 50.4       | 4.93     | 2833  |         | 22       |        |
| P30101     | Protein dis           | 62.970297    | 33         | 69     | 28       | 56.7       | 6.35     | 1279  |         | 33       |        |
| E1NZA1     | Peroxisome            | 27.5926619   | 53         | 68     | 53       | 292.6      | 7.43     | 1500  |         | 53       |        |
| Q06830     | Peroxiros             | 79.3969849   | 25         | 79     | 21       | 22.1       | 8.13     | 1273  |         | 25       |        |
| Q08211     | ATP-depend            | 43.3858268   | 49         | 76     | 49       | 140.9      | 6.84     | 1380  |         | 49       |        |
| P14625     | Endoplasm             | ir49.9377335 | 42         | 72     | 40       | 92.4       | 4.84     | 1516  |         | 42       |        |
| P68366     | Tubulin al            | 52.6785714   | 24         | 130    | 7        | 49.9       | 5.06     | 2929  |         | 24       |        |
| P00338     | L-lactate c           | 61.4457831   | 25         | 75     | 23       | 36.7       | 8.27     | 1465  |         | 25       |        |
| Q04695     | Keratin, $\gamma$ 60. | 0166667      | 36         | 71     | 20       | 48.1       | 5.02     | 1614  |         | 36       |        |
| P50990     | T-complex $\gamma$    | 61.8613139   | 36         | 66     | 36       | 59.6       | 5.6      | 1467  |         | 36       |        |
| V9HW37     | Epididymis            | 65.4343808   | 31         | 61     | 30       | 59.6       | 5.66     | 1030  |         | 31       |        |
| Q3BDU5     | Prelamin-A,           | 64.2710472   | 32         | 65     | 1        | 55.6       | 6.65     | 1559  |         | 32       |        |
| Q9Y490     | Talin-1 OS=           | 27.7449823   | 46         | 52     | 46       | 269.6      | 6.07     | 997   |         | 46       |        |
| P49368     | T-complex $\gamma$    | 64.4036697   | 34         | 68     | 34       | 60.5       | 6.49     | 1091  |         | 34       |        |
| P67936     | Tropomyos             | ir78.2258065 | 29         | 58     | 12       | 28.5       | 4.69     | 1163  |         | 29       |        |
| B2RA03     | cDNA, FLJ9            | 70           | 29         | 67     | 27       | 48         | 5.38     | 1544  |         | 29       |        |

|            |                      |              |    |     |    |       |       |      |    |
|------------|----------------------|--------------|----|-----|----|-------|-------|------|----|
| Q9NR30     | Nucleolar            | 45.9770115   | 36 | 66  | 35 | 87.3  | 9.28  | 1137 | 36 |
| V9HW31     | ATP synthase         | 53.3081285   | 20 | 55  | 20 | 56.5  | 5.4   | 1486 | 20 |
| A8K7F6     | cDNA FLJ78           | 60.3448276   | 26 | 57  | 4  | 46.1  | 5.48  | 1582 | 26 |
| Q59HH3     | Trifunctional        | 50.1912046   | 37 | 55  | 37 | 112.1 | 7.36  | 1167 | 37 |
| P38646     | Stress-70            | 47.275405    | 31 | 78  | 30 | 73.6  | 6.16  | 2038 | 31 |
| P07355     | Annexin A2           | 78.7610619   | 32 | 78  | 32 | 38.6  | 7.75  | 2267 | 32 |
| P26639     | Threonine            | 52.0055325   | 33 | 60  | 33 | 83.4  | 6.67  | 1011 | 33 |
| E9KL35     | Epididymis           | 79.8107256   | 21 | 47  | 21 | 35.1  | 7.69  | 1232 | 21 |
| P26599     | Polypyrimidine       | 60.6403013   | 20 | 69  | 18 | 57.2  | 9.17  | 1135 | 20 |
| AOA0S2Z491 | Nucleophosmin        | 50.3401361   | 17 | 62  | 17 | 32.6  | 4.78  | 1332 | 17 |
| P36578     | 60S ribosome         | 57.1428571   | 31 | 71  | 31 | 47.7  | 11.06 | 1136 | 31 |
| P04083     | Annexin A1           | 76.5895954   | 28 | 58  | 28 | 38.7  | 7.02  | 1694 | 28 |
| O75643     | U5 small nuclear     | 28.6985019   | 44 | 53  | 44 | 244.4 | 6.06  | 901  | 44 |
| B4DH02     | cDNA FLJ50           | 41.1904762   | 29 | 48  | 27 | 94.3  | 5.19  | 1187 | 29 |
| A8K486     | Peptidyl-protein     | 74.5454545   | 13 | 64  | 12 | 18    | 6.9   | 1821 | 13 |
| B4DJ30     | cDNA FLJ61           | 48.8442211   | 37 | 59  | 37 | 112.9 | 6.06  | 881  | 37 |
| P68871     | Hemoglobin           | 89.7959184   | 13 | 208 | 8  | 16    | 7.28  | 5215 | 13 |
| Q61BN1     | HNRPK protein        | 57.3275862   | 25 | 69  | 25 | 51    | 5.33  | 1438 | 25 |
| P06744     | Glucose-6-phosphate  | 55.0179211   | 29 | 68  | 29 | 63.1  | 8.32  | 901  | 29 |
| Q9UQ80     | Proliferation        | 59.8984772   | 26 | 52  | 26 | 43.8  | 6.55  | 1046 | 26 |
| Q4LE36     | ACLY variant         | 42.4802111   | 38 | 57  | 38 | 124.5 | 8.03  | 1169 | 38 |
| P12956     | X-ray repair         | 40.5582923   | 25 | 49  | 25 | 69.8  | 6.64  | 1166 | 25 |
| P08729     | Keratin, type        | 68.869936    | 38 | 76  | 33 | 51.4  | 5.48  | 1486 | 38 |
| P02786     | Transferrin          | 40.1315789   | 29 | 51  | 29 | 84.8  | 6.61  | 940  | 29 |
| P68032     | Actin, alpha         | 55.4376658   | 23 | 124 | 6  | 42    | 5.39  | 1998 | 23 |
| Q08J23     | tRNA (cytosine)      | 54.10691     | 33 | 50  | 33 | 86.4  | 6.77  | 885  | 33 |
| V9HWK2     | Epididymis           | 43.3862434   | 39 | 46  | 39 | 123.7 | 5.66  | 998  | 39 |
| Q9BUF5     | Tubulin beta         | 58.0717489   | 19 | 86  | 7  | 49.8  | 4.88  | 1604 | 19 |
| P60174     | Triosephosphate      | 79.3706294   | 22 | 58  | 22 | 30.8  | 5.92  | 1375 | 22 |
| Q9NZM1     | Myoferlin            | 24.8423096   | 38 | 48  | 38 | 234.6 | 6.18  | 721  | 38 |
| P51991     | Heterogeneous        | 53.1746032   | 24 | 54  | 4  | 39.6  | 9.01  | 555  | 24 |
| P13797     | Plastin-3            | 50.7936508   | 27 | 49  | 23 | 70.8  | 5.6   | 873  | 27 |
| P25705     | ATP synthase         | 50.6329114   | 29 | 50  | 29 | 59.7  | 9.13  | 1077 | 29 |
| P12270     | Nucleoprotein        | 26.110876    | 47 | 50  | 47 | 267.1 | 5.02  | 676  | 47 |
| P49411     | Elongation           | 55.0884956   | 19 | 45  | 19 | 49.5  | 7.61  | 943  | 19 |
| P17987     | T-complex            | 61.6906475   | 30 | 50  | 30 | 60.3  | 6.11  | 1112 | 30 |
| P55060     | Exportin-2           | 41.1946447   | 30 | 48  | 30 | 110.3 | 5.77  | 882  | 30 |
| Q9BQG0     | Myb-binding          | 37.3493976   | 37 | 57  | 37 | 148.8 | 9.28  | 876  | 37 |
| P13010     | X-ray repair         | 44.2622951   | 32 | 51  | 31 | 82.7  | 5.81  | 812  | 32 |
| J9R021     | Eukaryotic           | 31.9826339   | 41 | 56  | 41 | 166.4 | 6.79  | 816  | 41 |
| P52272     | Heterogeneous        | 50.6849315   | 31 | 47  | 17 | 77.5  | 8.7   | 1241 | 31 |
| AOA0S2Z4G8 | Tropomyosin          | 64.516129    | 24 | 49  | 9  | 28.7  | 4.72  | 943  | 24 |
| Q1ELT0     | MHC Class 1          | 62.1917808   | 17 | 45  | 10 | 41    | 6.9   | 1111 | 17 |
| Q53HV2     | Chaperonin           | 60.4051565   | 28 | 46  | 28 | 59.3  | 7.65  | 1047 | 28 |
| B4ddb6     | Heterogeneous        | 51.1235955   | 21 | 49  | 1  | 37    | 8.31  | 560  | 21 |
| Q6FHU2     | Phosphoglycyl        | 58.6614173   | 16 | 50  | 16 | 28.8  | 7.18  | 921  | 16 |
| O95373     | Importin-7           | 30.1541426   | 26 | 46  | 26 | 119.4 | 4.82  | 948  | 26 |
| B5BUE6     | ATP-dependent        | 53.7459283   | 30 | 59  | 23 | 69.1  | 8.92  | 971  | 30 |
| AOA0D9SF53 | ATP-dependent        | 44.0654843   | 32 | 49  | 31 | 81.4  | 8.07  | 969  | 32 |
| P50454     | Serpin HI            | 51.1961722   | 18 | 34  | 18 | 46.4  | 8.69  | 728  | 18 |
| P12268     | Inosine-5'-          | 52.3346304   | 21 | 38  | 20 | 55.8  | 6.9   | 861  | 21 |
| Q02790     | Peptidyl-protein     | 61.4379085   | 21 | 41  | 21 | 51.8  | 5.43  | 812  | 21 |
| AOA024RCN6 | Valyl-tRNA           | 34.0189873   | 34 | 51  | 34 | 140.4 | 7.59  | 759  | 34 |
| Q16719     | Kynureninase         | 50.1075269   | 18 | 43  | 16 | 52.3  | 7.03  | 752  | 18 |
| I3L504     | Eukaryotic           | 60.2150538   | 16 | 49  | 16 | 20.5  | 5.25  | 855  | 16 |
| Q59EG8     | Proteasome           | 40.3066813   | 29 | 41  | 29 | 100.5 | 5.15  | 766  | 29 |
| P11940     | Polyadenylation      | 50.4716981   | 29 | 48  | 19 | 70.6  | 9.5   | 943  | 29 |
| AOA024R8S5 | Protein disulfide    | 56.496063    | 30 | 52  | 30 | 57.1  | 4.87  | 983  | 30 |
| V9HW43     | Epididymis           | 90.7317073   | 19 | 52  | 19 | 22.8  | 6.4   | 1078 | 19 |
| Q9Y4L1     | Hypoxia up-regulated | 33.033033    | 28 | 39  | 28 | 111.3 | 5.22  | 979  | 28 |
| V9HWC7     | Epididymis           | 81.6964286   | 21 | 42  | 21 | 25    | 6.38  | 994  | 21 |
| B2RBR9     | cDNA, FLJ9           | 30.8219178   | 22 | 44  | 22 | 97.1  | 4.78  | 988  | 22 |
| AOA087WUT6 | Eukaryotic           | 28.0327869   | 27 | 38  | 27 | 138.6 | 5.58  | 535  | 27 |
| V9HW88     | Calreticulin         | 53.2374101   | 17 | 54  | 17 | 48.1  | 4.44  | 1128 | 17 |
| P50991     | T-complex            | 61.038961    | 27 | 46  | 26 | 57.9  | 7.83  | 830  | 27 |
| P26641     | Elongation           | 49.6567506   | 21 | 57  | 21 | 50.1  | 6.67  | 1126 | 21 |
| A8K492     | cDNA FLJ76           | 40.5555556   | 30 | 38  | 30 | 101.1 | 6.16  | 607  | 30 |
| P39023     | 60S ribosome         | 52.6054591   | 23 | 45  | 23 | 46.1  | 10.18 | 767  | 23 |
| E7EVA0     | Microtubule          | 16.4562473   | 31 | 44  | 31 | 245.3 | 6.23  | 624  | 31 |
| O60664     | Perilipin-2          | 69.124424    | 18 | 38  | 18 | 47    | 5.44  | 864  | 18 |
| P41091     | Eukaryotic           | 48.0932203   | 20 | 38  | 20 | 51.1  | 8.4   | 778  | 20 |
| A8MXP9     | Matrin-3             | 0539.1061453 | 27 | 60  | 27 | 99.9  | 6.04  | 571  | 27 |
| Q15181     | Inorganic            | 77.5086505   | 15 | 29  | 14 | 32.6  | 5.86  | 593  | 15 |

|            |               |             |    |     |    |       |       |      |    |
|------------|---------------|-------------|----|-----|----|-------|-------|------|----|
| O43175     | D-3-phospho   | 45.0281426  | 23 | 53  | 23 | 56.6  | 6.71  | 987  | 23 |
| P49748     | Very long-c   | 48.8549618  | 27 | 42  | 27 | 70.3  | 8.75  | 814  | 27 |
| E7EUU4     | Eukaryotic    | 25.5769231  | 33 | 49  | 2  | 171.5 | 5.31  | 549  | 33 |
| B2R9K8     | cDNA, FLJ9    | 59.6986817  | 24 | 38  | 24 | 57.9  | 6.8   | 836  | 24 |
| P49915     | GMP synthase  | 51.6594517  | 26 | 38  | 26 | 76.7  | 6.87  | 493  | 26 |
| J3KSZ0     | Eukaryotic    | 66.9565217  | 19 | 42  | 2  | 26.8  | 7.88  | 937  | 19 |
| P49736     | DNA replicase | 35.7300885  | 26 | 34  | 26 | 101.8 | 5.52  | 689  | 26 |
| B4DSI9     | cDNA FLJ56    | 26.3227513  | 33 | 49  | 2  | 166.5 | 5.22  | 536  | 33 |
| P62258     | 14-3-3 prot   | 72.5490196  | 19 | 54  | 17 | 29.2  | 4.74  | 952  | 19 |
| Q86UP2     | Kinectin O    | 30.7295505  | 33 | 38  | 33 | 156.2 | 5.64  | 620  | 33 |
| P31939     | Bifunctional  | 46.4527027  | 23 | 34  | 23 | 64.6  | 6.71  | 713  | 23 |
| Q5U077     | L-lactate c   | 51.497006   | 21 | 47  | 19 | 36.6  | 6.05  | 1087 | 21 |
| Q8WUM4     | Programmed    | 41.9354839  | 26 | 38  | 26 | 96    | 6.52  | 758  | 26 |
| P62805     | Histone H4    | 62.1359223  | 18 | 68  | 18 | 11.4  | 11.36 | 1200 | 18 |
| AOA0C4DG17 | 40S ribosom   | 63          | 16 | 39  | 4  | 33.3  | 4.87  | 879  | 16 |
| Q6S8J3     | POTE ankyri   | 12.0930233  | 13 | 108 | 1  | 121.3 | 6.2   | 2390 | 13 |
| P05387     | 60S acidic    | 80.8695652  | 8  | 32  | 8  | 11.7  | 4.54  | 1046 | 8  |
| P69905     | Hemoglobin    | 91.5492958  | 11 | 116 | 11 | 15.2  | 8.68  | 2007 | 11 |
| P62701     | 40S ribosom   | 77.1863118  | 25 | 57  | 25 | 29.6  | 10.15 | 976  | 25 |
| P53621     | Coatomer s    | 29.5751634  | 27 | 36  | 27 | 138.3 | 7.66  | 500  | 27 |
| K7ENT6     | Tropomyosin   | 65.9217877  | 18 | 40  | 1  | 20.6  | 4.61  | 828  | 18 |
| P63104     | 14-3-3 prot   | 77.1428571  | 20 | 46  | 14 | 27.7  | 4.79  | 1248 | 20 |
| P22234     | Multifuncti   | 53.4117647  | 23 | 36  | 23 | 47    | 7.23  | 955  | 23 |
| P09972     | Fructose-bi   | 46.4285714  | 15 | 48  | 11 | 39.4  | 6.87  | 1002 | 15 |
| Q16891     | MICOS comp    | 139.5778364 | 25 | 32  | 25 | 83.6  | 6.48  | 623  | 25 |
| P05023     | Sodium/pot    | 34.2130987  | 33 | 49  | 33 | 112.8 | 5.49  | 1078 | 33 |
| AOA024RDY0 | RAN binding   | 31.4494075  | 27 | 36  | 27 | 123.6 | 4.94  | 821  | 27 |
| P13667     | Protein di    | 46.6666667  | 28 | 45  | 28 | 72.9  | 5.07  | 584  | 28 |
| Q53SS8     | Epididymis    | 72.1910112  | 14 | 40  | 11 | 37.5  | 7.09  | 725  | 14 |
| Q5TCU3     | Tropomyosin   | 54.2253521  | 24 | 39  | 2  | 32.8  | 4.68  | 802  | 24 |
| Q01813     | ATP-depend    | 37.8826531  | 26 | 34  | 25 | 85.5  | 7.55  | 759  | 26 |
| V9HW25     | Epididymis    | 54.2253521  | 24 | 39  | 2  | 33    | 4.67  | 802  | 24 |
| Q16881     | Thioredoxin   | 41.1402157  | 18 | 29  | 17 | 70.9  | 7.39  | 747  | 18 |
| P62081     | 40S ribosom   | 70.1030928  | 14 | 47  | 14 | 22.1  | 10.1  | 629  | 14 |
| P04264     | Keratin, t    | 38.1987578  | 22 | 37  | 19 | 66    | 8.12  | 859  | 22 |
| AOA0S2Z4Z9 | Non-POU do    | 60.2972399  | 27 | 49  | 26 | 54.2  | 8.95  | 731  | 27 |
| AOA087X1N8 | Serpin B6     | 62.7848101  | 21 | 36  | 20 | 44.8  | 5.68  | 811  | 21 |
| AOA024RBS2 | 60S acidic    | 58.044164   | 15 | 36  | 15 | 34.3  | 5.97  | 822  | 15 |
| B5MDF5     | GTP-binding   | 50.2145923  | 17 | 52  | 17 | 26.2  | 7.01  | 922  | 17 |
| V9HW77     | Epididymis    | 69.5538058  | 20 | 33  | 20 | 42.6  | 5.59  | 700  | 20 |
| Q9HBB3     | 60S ribosom   | 45.3287197  | 21 | 45  | 21 | 32.9  | 10.58 | 1033 | 21 |
| Q6P2Q9     | Pre-mRNA-p    | 22.7408994  | 39 | 46  | 39 | 273.4 | 8.84  | 498  | 39 |
| O76021     | Ribosomal     | 143.4693878 | 22 | 43  | 22 | 54.9  | 10.13 | 672  | 22 |
| AOA140VJT8 | Testicular    | 64.208243   | 20 | 27  | 20 | 49.9  | 4.82  | 760  | 20 |
| AOA0C4DFU2 | Superoxide    | 68.018018   | 12 | 35  | 12 | 24.7  | 8.25  | 514  | 12 |
| P80723     | Brain acid    | 81.938326   | 13 | 38  | 13 | 22.7  | 4.63  | 813  | 13 |
| P00966     | Argininosuc   | 51.4563107  | 23 | 41  | 23 | 46.5  | 8.02  | 544  | 23 |
| P00491     | Purine nucl   | 69.8961938  | 16 | 32  | 16 | 32.1  | 6.95  | 944  | 16 |
| Q32Q12     | Nucleoside    | 72.6027397  | 14 | 43  | 5  | 32.6  | 8.48  | 769  | 14 |
| P23381     | Tryptophan    | 70.0636943  | 22 | 35  | 22 | 53.1  | 6.23  | 624  | 22 |
| P06737     | Glycogen pl   | 42.1487603  | 30 | 38  | 26 | 97.1  | 7.17  | 598  | 30 |
| P04843     | Dolichyl-di   | 46.6227348  | 22 | 37  | 22 | 68.5  | 6.38  | 711  | 22 |
| B2RDY9     | Adenylyl c    | 47.7894737  | 25 | 35  | 24 | 51.6  | 8.22  | 733  | 25 |
| P23528     | Cofilin-1     | 82.5301205  | 15 | 41  | 10 | 18.5  | 8.09  | 907  | 15 |
| Q8NC51     | Plasminogen   | 48.2843137  | 20 | 46  | 20 | 44.9  | 8.65  | 699  | 20 |
| Q15084     | Protein di    | 51.1363636  | 17 | 32  | 17 | 48.1  | 5.08  | 787  | 17 |
| P41250     | Glycine--t    | 39.7834912  | 23 | 35  | 22 | 83.1  | 7.03  | 523  | 23 |
| P00505     | Aspartate     | 61.1627907  | 21 | 33  | 21 | 47.5  | 9.01  | 544  | 21 |
| B2R5W3     | Poly [ADP-r   | 34.2209073  | 27 | 40  | 27 | 113   | 8.88  | 543  | 27 |
| O75694     | Nuclear poi   | 23.9396118  | 24 | 32  | 24 | 155.1 | 6.16  | 758  | 24 |
| Q12906     | Interleukin   | 35.6823266  | 24 | 44  | 24 | 95.3  | 8.76  | 896  | 24 |
| P23246     | Splicing f    | 38.6138614  | 22 | 37  | 21 | 76.1  | 9.44  | 497  | 22 |
| AOA024R4K3 | Malate dehy   | 61.5384615  | 18 | 37  | 18 | 35.5  | 8.68  | 1267 | 18 |
| AOA0S2Z4J1 | Hydroxyster   | 34.375      | 18 | 28  | 18 | 79.6  | 8.84  | 699  | 18 |
| J3KN67     | Tropomyosin   | 52.9824561  | 19 | 45  | 5  | 33.2  | 4.77  | 853  | 19 |
| B5BUB5     | Autoantigen   | 49.5098039  | 23 | 37  | 23 | 46.8  | 7.12  | 557  | 23 |
| V9HW63     | Epididymis    | 64.9446494  | 15 | 40  | 12 | 30.5  | 6.29  | 577  | 15 |
| AOA024RAC5 | Regulator c   | 42.9118774  | 17 | 30  | 17 | 56    | 8.78  | 777  | 17 |
| P67809     | Nuclease-s    | 67.9012346  | 14 | 32  | 7  | 35.9  | 9.88  | 428  | 14 |
| P46013     | Proliferati   | 17.1683047  | 33 | 36  | 33 | 358.5 | 9.45  | 483  | 33 |
| B4DLV7     | Rab GDP di    | 55.233853   | 21 | 30  | 16 | 51.1  | 8.18  | 521  | 21 |
| P14866     | Heterogenec   | 49.5755518  | 22 | 43  | 21 | 64.1  | 8.22  | 491  | 22 |
| AOA140VJW5 | Testicular    | 58.4830339  | 26 | 37  | 26 | 57.1  | 6.55  | 714  | 26 |



|            |                          |               |    |    |    |       |       |      |    |
|------------|--------------------------|---------------|----|----|----|-------|-------|------|----|
| AOA0S2Z4A5 | DNA helicase             | 40.7510431    | 22 | 34 | 22 | 81.3  | 6.46  | 529  | 22 |
| AOA0S2Z410 | Hydroxysteroid           | 73.9463602    | 14 | 33 | 14 | 26.9  | 7.78  | 1015 | 14 |
| AOA140VJY2 | Testicular               | 44.3181818    | 24 | 35 | 23 | 80.1  | 8.21  | 715  | 24 |
| A3ROT8     | Histone 1,               | 35.6164384    | 14 | 50 | 4  | 21.9  | 11.03 | 1277 | 14 |
| P27824     | Calnexin                 | 0:37.8378378  | 18 | 46 | 18 | 67.5  | 4.6   | 729  | 18 |
| AOA024RBH2 | Cytoskeleton             | 48.6710963    | 24 | 31 | 23 | 66    | 5.92  | 614  | 24 |
| P16403     | Histone H1.              | 40.8450704    | 14 | 54 | 4  | 21.4  | 10.93 | 1281 | 14 |
| O60506     | Heterogeneous            | 41.5730337    | 24 | 36 | 19 | 69.6  | 8.59  | 733  | 24 |
| P55884     | Eukaryotic               | 35.3808354    | 20 | 28 | 20 | 92.4  | 5     | 574  | 20 |
| Q61Q30     | Polyadenylate            | 35            | 22 | 32 | 12 | 72.3  | 9.35  | 754  | 22 |
| Q9UMS4     | Pre-mRNA-pro             | 51.3888889    | 16 | 30 | 16 | 55.1  | 6.61  | 474  | 16 |
| P15121     | Aldose reductase         | 64.556962     | 17 | 39 | 16 | 35.8  | 6.98  | 553  | 17 |
| Q59FF0     | EBNA-2 core              | 31.7427386    | 23 | 33 | 23 | 107.4 | 7.52  | 544  | 23 |
| BOQY89     | Eukaryotic               | 39.2092257    | 22 | 34 | 22 | 70.9  | 6.65  | 691  | 22 |
| P62424     | 60S ribosome             | 60.9022556    | 20 | 53 | 20 | 30    | 10.61 | 882  | 20 |
| A8KAP3     | cDNA FLJ78               | 37.345679     | 27 | 40 | 26 | 109.4 | 5.01  | 531  | 27 |
| O00299     | Chloride channel         | 72.1991701    | 19 | 31 | 19 | 26.9  | 5.17  | 790  | 19 |
| P43490     | Nicotinamide             | 49.694501     | 19 | 32 | 19 | 55.5  | 7.15  | 665  | 19 |
| E9KL44     | Epididymis               | 41.5465269    | 24 | 32 | 24 | 82.9  | 9.04  | 569  | 24 |
| B2R8R5     | cDNA, FLJ9               | 31.6167665    | 19 | 27 | 19 | 88.5  | 5.77  | 625  | 19 |
| Q59F66     | DEAD box protein         | 41.5196744    | 26 | 37 | 19 | 81    | 7.93  | 841  | 26 |
| A8K690     | cDNA FLJ76               | 48.6187845    | 26 | 35 | 26 | 62.6  | 6.8   | 674  | 26 |
| P27348     | 14-3-3 protein           | 59.5918367    | 18 | 36 | 12 | 27.7  | 4.78  | 826  | 18 |
| O43390     | Heterogeneous            | 39.9684044    | 22 | 38 | 17 | 70.9  | 8.13  | 554  | 22 |
| P49588     | Alanine aminotransferase | 33.3677686    | 28 | 35 | 28 | 106.7 | 5.53  | 702  | 28 |
| P62917     | 60S ribosome             | 55.6420233    | 15 | 35 | 15 | 28    | 11.03 | 574  | 15 |
| AOA024R814 | Ribosomal protein        | 58.6872587    | 22 | 44 | 22 | 30.4  | 10.71 | 727  | 22 |
| P11586     | C-1-tetrahymena          | 43.1016043    | 32 | 38 | 32 | 101.5 | 7.3   | 644  | 32 |
| E9PEB5     | Far upstream element     | 40.610687     | 23 | 34 | 21 | 68.9  | 7.93  | 706  | 23 |
| P08237     | ATP-dependent            | 34.3589744    | 20 | 28 | 18 | 85.1  | 7.99  | 527  | 20 |
| P33991     | DNA replication          | 34.9942063    | 25 | 34 | 25 | 96.5  | 6.74  | 546  | 25 |
| O14980     | Exportin-1               | 32.2128852    | 28 | 36 | 28 | 123.3 | 6.06  | 517  | 28 |
| B4DI54     | cDNA FLJ56               | 30.070922     | 18 | 50 | 3  | 77.5  | 8.06  | 1161 | 18 |
| R4GNH3     | 26S proteasome           | 52.0094563    | 18 | 32 | 1  | 47.3  | 5.22  | 603  | 18 |
| Q9Y230     | RuvB-like                | 43.8444924    | 21 | 28 | 21 | 51.1  | 5.64  | 697  | 21 |
| P23396     | 40S ribosome             | 83.5390947    | 27 | 54 | 27 | 26.7  | 9.66  | 837  | 27 |
| P51858     | Hepatoma-derived         | 66.25         | 15 | 27 | 13 | 26.8  | 4.73  | 446  | 15 |
| AOA024R904 | Calcyclin                | 81.1403509    | 17 | 24 | 17 | 26.2  | 8.25  | 534  | 17 |
| B2R6J2     | cDNA, FLJ9               | 38.7372014    | 27 | 52 | 16 | 69.4  | 6.27  | 698  | 27 |
| Q13838     | Spliceosome              | 46.2616822    | 17 | 36 | 7  | 49    | 5.67  | 714  | 17 |
| B2RCM2     | cDNA, FLJ9               | 26.7006803    | 26 | 34 | 26 | 134.4 | 7.2   | 546  | 26 |
| Q13085     | Acetyl-CoA               | 17.1355499    | 26 | 28 | 26 | 265.4 | 6.37  | 451  | 26 |
| A2RUM7     | Ribosomal protein        | 52.1885522    | 19 | 38 | 19 | 34.3  | 9.72  | 780  | 19 |
| Q59G75     | Isoleucyl-tRNA           | 25.6450352    | 24 | 32 | 24 | 146.3 | 6.35  | 567  | 24 |
| Q15393     | Splicing factor          | 23.253903     | 24 | 30 | 24 | 135.5 | 5.26  | 599  | 24 |
| P34897     | Serine hydrolase         | 53.5714286    | 22 | 30 | 22 | 56    | 8.53  | 577  | 22 |
| P27695     | DNA-(apurinic)           | 67.9245283    | 16 | 24 | 16 | 35.5  | 8.12  | 408  | 16 |
| AOA024RDS1 | Heat shock               | 38.3449883    | 26 | 34 | 24 | 96.8  | 5.39  | 808  | 26 |
| P61247     | 40S ribosome             | 65.9090909    | 21 | 38 | 21 | 29.9  | 9.73  | 817  | 21 |
| P05198     | Eukaryotic               | 67.9365079    | 23 | 37 | 23 | 36.1  | 5.08  | 549  | 23 |
| V9HWD6     | Epididymis               | 67.0731707    | 17 | 36 | 8  | 28.1  | 4.83  | 707  | 17 |
| P30153     | Serine/threonine         | 39.049236     | 17 | 30 | 14 | 65.3  | 5.11  | 450  | 17 |
| BOYJ88     | Radixin                  | OS:39.9656947 | 26 | 47 | 13 | 68.5  | 6.37  | 705  | 26 |
| Q96QK1     | Vacuolar protein         | 33.2914573    | 22 | 28 | 22 | 91.6  | 5.49  | 569  | 22 |
| P20700     | Lamin-B1                 | OS:24.2491468 | 21 | 30 | 20 | 66.4  | 5.16  | 552  | 21 |
| Q16658     | Fascin                   | OS:55.7809331 | 24 | 38 | 24 | 54.5  | 7.24  | 633  | 24 |
| P21796     | Voltage-dependent        | 72.4381625    | 16 | 30 | 14 | 30.8  | 8.54  | 719  | 16 |
| Q96RS2     | 40S ribosome             | 45.7627119    | 13 | 27 | 1  | 33    | 4.93  | 633  | 13 |
| P38919     | Eukaryotic               | 41.1192214    | 21 | 33 | 17 | 46.8  | 6.73  | 654  | 21 |
| P08758     | Annexin A5               | 65.3125       | 19 | 39 | 19 | 35.9  | 5.05  | 999  | 19 |
| P17980     | 26S proteasome           | 53.0751708    | 18 | 31 | 1  | 49.2  | 5.24  | 594  | 18 |
| Q92499     | ATP-dependent            | 32.5675676    | 17 | 27 | 17 | 82.4  | 7.23  | 455  | 17 |
| P11413     | Glucose-6-phosphate      | 55.5339806    | 23 | 35 | 23 | 59.2  | 6.84  | 532  | 23 |
| B2R6D0     | cDNA, FLJ9               | 35.0472193    | 21 | 27 | 21 | 105.8 | 5.39  | 443  | 21 |
| Q16531     | DNA damage               | 22.8070175    | 21 | 30 | 21 | 126.9 | 5.26  | 400  | 21 |
| P11388     | DNA topoisomerase        | 24.3631613    | 29 | 38 | 25 | 174.3 | 8.72  | 557  | 29 |
| J3KPF3     | 4F2 cell-surface         | 37.7179081    | 18 | 34 | 18 | 68.1  | 5.05  | 518  | 18 |
| Q6NVC0     | SLC25A5 precursor        | 53.869969     | 23 | 48 | 10 | 35.3  | 9.82  | 815  | 23 |
| Q5T4S7     | E3 ubiquitin             | 7.96835809    | 26 | 29 | 26 | 573.5 | 6.04  | 392  | 26 |
| Q15046     | Lysine-tRNA              | 39.8659966    | 24 | 34 | 24 | 68    | 6.35  | 452  | 24 |
| Q99497     | Protein DJ-1             | 75.6613757    | 11 | 28 | 11 | 19.9  | 6.79  | 659  | 11 |
| Q86VP6     | Cullin-associated        | 30.9756098    | 29 | 37 | 29 | 136.3 | 5.78  | 387  | 29 |
| B5BUB1     | RuvB-like                | 58.1140351    | 20 | 35 | 20 | 50.2  | 6.42  | 600  | 20 |

|            |             |             |    |    |    |       |       |      |    |
|------------|-------------|-------------|----|----|----|-------|-------|------|----|
| Q00796     | Sorbitol d  | 67.5070028  | 15 | 27 | 1  | 38.3  | 7.97  | 521  | 15 |
| A0A0S2Z3L2 | ATPase Ca+  | 26.0076775  | 22 | 28 | 22 | 114.7 | 5.34  | 463  | 22 |
| P15170     | Eukaryotic  | 42.4849699  | 19 | 29 | 10 | 55.7  | 5.62  | 402  | 19 |
| V9HW89     | Epididymis  | 67.5070028  | 15 | 27 | 1  | 38.3  | 7.97  | 515  | 15 |
| B2RE46     | cDNA, FLJ9  | 39.9366086  | 15 | 24 | 15 | 69.3  | 5.78  | 319  | 15 |
| O43143     | Pre-mRNA-s  | 32.5786164  | 21 | 36 | 21 | 90.9  | 7.46  | 636  | 21 |
| A6NNZ2     | Tubulin bet | 25.4504505  | 11 | 87 | 1  | 49.5  | 4.86  | 1524 | 11 |
| Q14103     | Heterogene  | 37.7464789  | 18 | 30 | 15 | 38.4  | 7.81  | 514  | 18 |
| V9HWC9     | Superoxide  | 71.4285714  | 5  | 19 | 5  | 15.9  | 6.13  | 327  | 5  |
| P30048     | Thioredoxin | 41.40625    | 10 | 25 | 10 | 27.7  | 7.78  | 603  | 10 |
| Q16576     | Histone-bir | 61.1764706  | 15 | 24 | 10 | 47.8  | 5.05  | 374  | 15 |
| Q619V5     | SLC25A6 pr  | 63.7583893  | 20 | 38 | 3  | 32.8  | 9.74  | 870  | 20 |
| Q6ZNK5     | FLJ00293 p  | 30.4187192  | 18 | 24 | 2  | 92.8  | 8.95  | 509  | 18 |
| Q6FI13     | Histone H2  | 57.6923077  | 7  | 58 | 3  | 14.1  | 10.9  | 1244 | 7  |
| P23526     | Adenosylho  | 43.287037   | 20 | 40 | 18 | 47.7  | 6.34  | 865  | 20 |
| Q8NE71     | ATP-binding | 28.2840237  | 21 | 24 | 21 | 95.9  | 6.8   | 399  | 21 |
| Q08945     | FACT comple | 28.6318759  | 17 | 23 | 17 | 81    | 6.87  | 551  | 17 |
| B011T2     | Unconventi  | 23.870334   | 18 | 24 | 2  | 116.4 | 8.73  | 495  | 18 |
| S4R3H4     | Apoptotic c | 20.6547155  | 19 | 24 | 18 | 145.4 | 6     | 482  | 19 |
| A0A0D6K958 | MHC class I | 50.273224   | 12 | 29 | 2  | 40.9  | 6.46  | 687  | 12 |
| P05556     | Integrin be | 24.6867168  | 16 | 31 | 16 | 88.4  | 5.39  | 657  | 16 |
| P49792     | E3 SUMO-pr  | 12.0657568  | 26 | 27 | 26 | 358   | 6.2   | 473  | 26 |
| P31040     | Succinate c | 38.8554217  | 18 | 25 | 18 | 72.6  | 7.39  | 578  | 18 |
| Q13283     | Ras GTPase  | 47.639485   | 14 | 27 | 13 | 52.1  | 5.52  | 463  | 14 |
| B5ME19     | Eukaryotic  | 23.0853392  | 21 | 32 | 21 | 105.4 | 5.64  | 577  | 21 |
| Q9Y617     | Phosphoseri | 52.972973   | 17 | 26 | 17 | 40.4  | 7.66  | 627  | 17 |
| A2A274     | Aconitate l | 35.6521739  | 20 | 25 | 20 | 87.8  | 7.37  | 456  | 20 |
| P36952     | Serpin B5 ( | 48          | 14 | 20 | 14 | 42.1  | 6.05  | 463  | 14 |
| A0A0K0K1K4 | Proteasome  | 60.8870968  | 14 | 24 | 14 | 27.9  | 8.46  | 446  | 14 |
| Q12788     | Transducin  | 34.2821782  | 18 | 22 | 18 | 89    | 6.9   | 587  | 18 |
| A0A024R4U3 | Tubulin ty  | 36.0248447  | 16 | 23 | 16 | 74.4  | 5.53  | 395  | 16 |
| Q15691     | Microtubule | 64.9253731  | 15 | 23 | 15 | 30    | 5.14  | 367  | 15 |
| P54136     | Arginine--  | 38.7878788  | 20 | 28 | 20 | 75.3  | 6.68  | 508  | 20 |
| O75083     | WD repeat-  | 39.4389439  | 14 | 18 | 14 | 66.2  | 6.65  | 348  | 14 |
| P23284     | Peptidyl-pr | 58.3333333  | 15 | 38 | 15 | 23.7  | 9.41  | 725  | 15 |
| O75533     | Splicing fe | 26.5337423  | 22 | 30 | 22 | 145.7 | 7.09  | 331  | 22 |
| B3KSM6     | cDNA FLJ3   | 621.9284603 | 15 | 49 | 1  | 70.9  | 6.14  | 1049 | 15 |
| A0A0S2Z4R1 | Tyrosine--  | 151.1363636 | 22 | 31 | 22 | 59.1  | 7.05  | 389  | 22 |
| P15924     | Desmoplakin | 11.9818878  | 27 | 31 | 27 | 331.6 | 6.81  | 451  | 27 |
| Q9Y5B9     | FACT comple | 27.8892073  | 24 | 31 | 24 | 119.8 | 5.66  | 427  | 24 |
| P35908     | Keratin, ty | 38.028169   | 22 | 32 | 16 | 65.4  | 8     | 653  | 22 |
| A0A140VK70 | Testis sec  | 49.6535797  | 20 | 28 | 20 | 48.6  | 5.95  | 650  | 20 |
| B4DR52     | Histone H2  | 37.9518072  | 9  | 73 | 6  | 18    | 10.32 | 2073 | 9  |
| P42167     | Lamina-ass  | 50.4405286  | 15 | 23 | 6  | 50.6  | 9.38  | 520  | 15 |
| P22695     | Cytochrome  | 43.0463576  | 15 | 23 | 15 | 48.4  | 8.63  | 471  | 15 |
| B2R7C5     | DNA helica  | 31.9306931  | 21 | 28 | 21 | 91    | 5.77  | 584  | 21 |
| P09429     | High mobil  | 155.3488372 | 13 | 35 | 8  | 24.9  | 5.74  | 528  | 13 |
| G8JLB6     | Heterogene  | 38.1355932  | 14 | 33 | 6  | 51.2  | 6.8   | 897  | 14 |
| P37802     | Transgelin  | 81.4070352  | 17 | 44 | 17 | 22.4  | 8.25  | 766  | 17 |
| A0A140VK27 | Leukotrien  | 37.9705401  | 19 | 23 | 19 | 69.2  | 6.18  | 447  | 19 |
| Q15293     | Reticulocal | 151.6616314 | 12 | 21 | 12 | 38.9  | 5     | 329  | 12 |
| P20290     | Transcripti | 63.1067961  | 9  | 19 | 6  | 22.2  | 9.38  | 574  | 9  |
| D9IAI1     | Epididymis  | 82.3529412  | 12 | 23 | 12 | 21    | 7.53  | 569  | 12 |
| P16152     | Carbonyl re | 67.1480144  | 16 | 28 | 16 | 30.4  | 8.32  | 733  | 16 |
| A2A3R6     | 40S riboso  | 40.562249   | 13 | 25 | 13 | 28.7  | 10.84 | 745  | 13 |
| P62136     | Serine/thre | 48.1818182  | 14 | 25 | 3  | 37.5  | 6.33  | 581  | 14 |
| A0A0A0MSS8 | Aldo-keto   | 147.6780186 | 12 | 23 | 9  | 36.8  | 7.94  | 505  | 12 |
| P29508     | Serpin B3 ( | 42.5641026  | 20 | 25 | 8  | 44.5  | 6.81  | 509  | 20 |
| P36873     | Serine/thre | 45.8204334  | 13 | 23 | 2  | 37    | 6.54  | 573  | 13 |
| Q96TA1     | Niban-like  | 39.5442359  | 17 | 26 | 17 | 84.1  | 6.19  | 219  | 17 |
| P31153     | S-adenosyl  | 49.1139241  | 18 | 25 | 18 | 43.6  | 6.48  | 380  | 18 |
| A8K9K6     | cDNA FLJ7   | 640.4040404 | 18 | 26 | 18 | 65.9  | 9.23  | 459  | 18 |
| P12429     | Annexin A3  | 59.1331269  | 19 | 26 | 19 | 36.4  | 5.92  | 421  | 19 |
| P07954     | Fumarate hy | 41.1764706  | 16 | 25 | 16 | 54.6  | 8.76  | 399  | 16 |
| A0A0S4T3F5 | MHC class I | 40.1639344  | 10 | 26 | 3  | 40.9  | 7.2   | 593  | 10 |
| P15531     | Nucleoside  | 70.3947368  | 10 | 31 | 1  | 17.1  | 6.19  | 594  | 10 |
| Q7Z2W4     | Zinc finger | 31.7073171  | 20 | 23 | 20 | 101.4 | 8.4   | 461  | 20 |
| Q96HE7     | ERO1-like   | 47.008547   | 17 | 27 | 17 | 54.4  | 5.68  | 359  | 17 |
| P55786     | Puromycin-  | 23.9390642  | 18 | 26 | 18 | 103.2 | 5.72  | 430  | 18 |
| V9HW04     | Serine/thre | 49.8470948  | 14 | 24 | 4  | 37.2  | 6.19  | 494  | 14 |
| A0A024R7T3 | Heterogene  | 39.0361446  | 12 | 23 | 10 | 45.6  | 5.58  | 723  | 12 |
| Q5JR94     | 40S riboso  | 60.5769231  | 15 | 32 | 15 | 24.2  | 10.32 | 609  | 15 |
| P47897     | Glutamine-- | 34.1935484  | 21 | 27 | 21 | 87.7  | 7.15  | 496  | 21 |

|            |             |             |    |     |    |       |       |      |    |
|------------|-------------|-------------|----|-----|----|-------|-------|------|----|
| P35606     | Coatomer st | 33.2229581  | 22 | 25  | 22 | 102.4 | 5.27  | 412  | 22 |
| O15067     | Phosphoribc | 23.2436472  | 20 | 22  | 20 | 144.6 | 5.76  | 317  | 20 |
| AOA024RA11 | ARP3 actin- | 47.84689    | 18 | 24  | 18 | 47.3  | 5.88  | 407  | 18 |
| V9HWH1     | Epididymis  | 47.2295515  | 15 | 24  | 14 | 42.7  | 6.28  | 509  | 15 |
| P48047     | ATP syntha: | 69.0140845  | 13 | 25  | 13 | 23.3  | 9.96  | 834  | 13 |
| Q562S0     | Actin-like  | 67.961165   | 5  | 40  | 1  | 11.5  | 6.24  | 433  | 5  |
| V9HWK0     | Signal recc | 35.7675112  | 17 | 21  | 17 | 74.6  | 9.26  | 472  | 17 |
| AOA140VK94 | RAN binding | 60.6965174  | 8  | 19  | 8  | 23.3  | 5.29  | 207  | 8  |
| Q9Y3I0     | tRNA-splici | 39.8019802  | 13 | 18  | 13 | 55.2  | 7.23  | 350  | 13 |
| Q4LE64     | NUMA1 vari  | 17.3031589  | 25 | 34  | 13 | 238.7 | 5.81  | 409  | 25 |
| P54886     | Delta-1-py  | 25.2830189  | 16 | 22  | 16 | 87.2  | 7.12  | 336  | 16 |
| Q9Y3F4     | Serine-thre | 56.2857143  | 13 | 21  | 13 | 38.4  | 5.12  | 518  | 13 |
| Q59HE3     | Calpastatir | 32.3979592  | 16 | 24  | 1  | 84.2  | 5.35  | 397  | 16 |
| Q8TDN6     | Ribosome bi | 52.6912181  | 12 | 21  | 11 | 41.4  | 9.92  | 284  | 12 |
| AOAOKOK1I0 | Epididymis  | 30.6338028  | 13 | 24  | 1  | 32.8  | 4.77  | 496  | 13 |
| P55795     | Heterogenec | 37.8619154  | 14 | 26  | 7  | 49.2  | 6.3   | 657  | 14 |
| AOA024RAM0 | Transportir | 31.1804009  | 20 | 26  | 20 | 102.3 | 4.98  | 391  | 20 |
| O00231     | 26S protea  | 50.2369668  | 18 | 27  | 18 | 47.4  | 6.48  | 410  | 18 |
| P17812     | CTP syntha: | 34.6869712  | 18 | 23  | 18 | 66.6  | 6.46  | 487  | 18 |
| AOA024RA52 | Proteasome  | 46.1538462  | 10 | 20  | 10 | 25.9  | 7.43  | 469  | 10 |
| AOA191W087 | MHC class   | 140.8839779 | 12 | 29  | 7  | 40.4  | 6.15  | 502  | 12 |
| Q9UHD1     | Cysteine ar | 53.313253   | 14 | 20  | 14 | 37.5  | 7.87  | 354  | 14 |
| P46060     | Ran GTPase- | 39.1822828  | 18 | 33  | 18 | 63.5  | 4.68  | 399  | 18 |
| P40763     | Signal trar | 29.8701299  | 14 | 17  | 14 | 88    | 6.3   | 480  | 14 |
| Q8NBS9     | Thioredoxin | 46.5277778  | 18 | 24  | 18 | 47.6  | 5.97  | 347  | 18 |
| Q8TEM1     | Nuclear poi | 17.3290938  | 20 | 25  | 20 | 205   | 6.81  | 399  | 20 |
| AOA0C4DGB5 | Calpastatir | 33.0238727  | 16 | 23  | 1  | 81    | 5.1   | 356  | 16 |
| P07737     | Profilin-1  | 75.7142857  | 13 | 33  | 13 | 15    | 8.27  | 780  | 13 |
| P84077     | ADP-ribosyl | 62.9834254  | 10 | 21  | 5  | 20.7  | 6.8   | 478  | 10 |
| B5BU01     | Eukaryotic  | 34.5345345  | 14 | 22  | 14 | 38.3  | 5.94  | 493  | 14 |
| P31930     | Cytochrome  | 45.2083333  | 15 | 18  | 15 | 52.6  | 6.37  | 254  | 15 |
| D3DUZ3     | Interferon, | 27.2851296  | 16 | 23  | 16 | 82.4  | 9.32  | 312  | 16 |
| AOA0S2Z489 | Proteasome  | 44.5175439  | 18 | 22  | 17 | 52.9  | 7.65  | 422  | 18 |
| AOA024R2Z6 | Guanine nuc | 32.5884544  | 15 | 22  | 15 | 60.5  | 8.79  | 441  | 15 |
| P17858     | ATP-depende | 20.5128205  | 11 | 17  | 6  | 85    | 7.5   | 312  | 11 |
| E9KL48     | Epididymis  | 34.9462366  | 14 | 20  | 14 | 61.4  | 7.8   | 258  | 14 |
| Q14566     | DNA replic  | 30.816078   | 22 | 29  | 22 | 92.8  | 5.41  | 415  | 22 |
| P31947     | 14-3-3 prot | 62.9032258  | 14 | 26  | 10 | 27.8  | 4.74  | 502  | 14 |
| Q15717     | ELAV-like   | 52.4539877  | 14 | 20  | 14 | 36.1  | 9.17  | 320  | 14 |
| Q92900     | Regulator c | 20.4605846  | 15 | 22  | 15 | 124.3 | 6.61  | 258  | 15 |
| Q13435     | Splicing fe | 26.0335196  | 17 | 25  | 17 | 100.2 | 5.67  | 290  | 17 |
| Q53GG0     | Epithelial  | 30.3030303  | 16 | 21  | 16 | 85.2  | 6.84  | 499  | 16 |
| Q9BY44     | Eukaryotic  | 41.5384615  | 17 | 25  | 17 | 64.9  | 8.87  | 280  | 17 |
| B3KU28     | Lon protea  | 28.4023669  | 18 | 21  | 17 | 95.1  | 6.27  | 298  | 18 |
| P02042     | Hemoglobin  | 42.8571429  | 6  | 109 | 1  | 16    | 8.05  | 3090 | 6  |
| H7C2I1     | Protein ar  | 45.2830189  | 15 | 24  | 6  | 42.4  | 5.35  | 516  | 15 |
| P36871     | Phosphogluc | 40.2135231  | 18 | 23  | 18 | 61.4  | 6.76  | 344  | 18 |
| O75534     | Cold shock  | 33.5839599  | 20 | 26  | 20 | 88.8  | 6.25  | 420  | 20 |
| Q12965     | Unconventic | 23.1046931  | 21 | 24  | 21 | 127   | 8.92  | 398  | 21 |
| Q5U0F4     | Eukaryotic  | 62.7692308  | 16 | 20  | 16 | 36.5  | 5.64  | 351  | 16 |
| Q7L2H7     | Eukaryotic  | 40.3743316  | 12 | 20  | 12 | 42.5  | 5.63  | 464  | 12 |
| O15371     | Eukaryotic  | 27.7372263  | 14 | 18  | 14 | 63.9  | 6.05  | 564  | 14 |
| P50579     | Methionine  | 32.2175732  | 13 | 20  | 13 | 52.9  | 5.82  | 248  | 13 |
| O00148     | ATP-depende | 39.1100703  | 16 | 31  | 5  | 49.1  | 5.68  | 374  | 16 |
| P15880     | 40S riboson | 52.9010239  | 14 | 33  | 9  | 31.3  | 10.24 | 543  | 14 |
| HOYK48     | Tropomyosin | 42.7419355  | 13 | 23  | 2  | 28.6  | 4.77  | 462  | 13 |
| Q6IAW5     | CALU protei | 52.3809524  | 12 | 20  | 12 | 37.1  | 4.64  | 412  | 12 |
| Q08AJ9     | Histone H2/ | 35.3846154  | 6  | 49  | 2  | 14.1  | 11.05 | 1045 | 6  |
| AOA0J9YVP6 | Poly(U)-bir | 33.3333333  | 12 | 20  | 12 | 57.4  | 5.35  | 398  | 12 |
| P26583     | High mobili | 44.0191388  | 12 | 24  | 9  | 24    | 7.81  | 360  | 12 |
| P02533     | Keratin, ty | 37.5        | 21 | 34  | 3  | 51.5  | 5.16  | 599  | 21 |
| Q92621     | Nuclear poi | 12.4254473  | 20 | 21  | 20 | 227.8 | 6.19  | 406  | 20 |
| P52789     | Hexokinase- | 25.9541985  | 17 | 20  | 16 | 102.3 | 6.05  | 596  | 17 |
| Q15424     | Scaffold at | 20.1092896  | 12 | 16  | 4  | 102.6 | 5.47  | 292  | 12 |
| Q59EA2     | Coronin (F) | 30.1397206  | 16 | 24  | 16 | 56.3  | 8.19  | 396  | 16 |
| Q05639     | Elongation  | 38.4449244  | 13 | 95  | 3  | 50.4  | 9.03  | 1907 | 13 |
| P62277     | 40S riboson | 46.3576159  | 11 | 28  | 11 | 17.2  | 10.54 | 496  | 11 |
| P13804     | Electron tr | 51.0510511  | 12 | 19  | 12 | 35.1  | 8.38  | 475  | 12 |
| B2R9S4     | cDNA, FLJ9  | 57.4712644  | 13 | 23  | 13 | 38.5  | 6.37  | 499  | 13 |
| P35613     | Basigin OS- | 23.1168831  | 7  | 13  | 7  | 42.2  | 5.66  | 406  | 7  |
| P55265     | Double-str  | 19.1680261  | 17 | 19  | 17 | 136   | 8.65  | 271  | 17 |
| Q14151     | Scaffold at | 17.3137461  | 12 | 16  | 4  | 107.4 | 6.16  | 265  | 12 |
| Q14258     | E3 ubiquiti | 27.6190476  | 17 | 21  | 1  | 70.9  | 8.09  | 384  | 17 |

|            |                       |    |    |    |       |       |      |    |
|------------|-----------------------|----|----|----|-------|-------|------|----|
| P22087     | rRNA 2'-O-m42.9906542 | 11 | 19 | 11 | 33.8  | 10.18 | 396  | 11 |
| V9HW55     | Proteasome 40.8921933 | 12 | 21 | 12 | 30.2  | 6.99  | 370  | 12 |
| Q9Y678     | Coatome r s1.3501144  | 18 | 21 | 17 | 97.7  | 5.47  | 207  | 18 |
| P30050     | 60S riboson64.2424242 | 10 | 29 | 10 | 17.8  | 9.42  | 658  | 10 |
| Q59GW5     | Tripartite 27.3291925 | 17 | 21 | 1  | 72.2  | 8.06  | 365  | 17 |
| A7BI36     | p180/ribosc14.5454545 | 15 | 18 | 15 | 165.6 | 8.97  | 515  | 15 |
| Q9Y2T3     | Guanine de42.7312775  | 13 | 18 | 13 | 51    | 5.68  | 385  | 13 |
| P62979     | Ubiquitin-460.8974359 | 9  | 46 | 9  | 18    | 9.64  | 903  | 9  |
| K7EIG1     | Clustered n18.4652278 | 16 | 19 | 3  | 140.5 | 6.4   | 297  | 16 |
| P39687     | Acidic leuc35.3413655 | 14 | 25 | 8  | 28.6  | 4.09  | 543  | 14 |
| P08727     | Keratin, t51.5        | 20 | 26 | 13 | 44.1  | 5.14  | 556  | 20 |
| Q562R1     | Beta-actin-28.1914894 | 13 | 67 | 2  | 42    | 5.59  | 1240 | 13 |
| P25789     | Proteasome 52.4904215 | 11 | 18 | 11 | 29.5  | 7.72  | 546  | 11 |
| Q9Y266     | Nuclear m32.9305136   | 12 | 21 | 12 | 38.2  | 5.38  | 278  | 12 |
| A0A0A6YYL6 | Protein RPI39.4736842 | 11 | 23 | 11 | 26.4  | 10.1  | 342  | 11 |
| P53618     | Coatome r s22.455404  | 13 | 19 | 13 | 107.1 | 6.05  | 246  | 13 |
| P13645     | Keratin, t29.4520548  | 15 | 19 | 13 | 58.8  | 5.21  | 523  | 15 |
| P21291     | Cysteine a59.5854922  | 8  | 12 | 8  | 20.6  | 8.57  | 335  | 8  |
| O14744     | Protein a31.2401884   | 16 | 20 | 16 | 72.6  | 6.29  | 284  | 16 |
| Q14240     | Eukaryotic 31.4496314 | 14 | 25 | 1  | 46.4  | 5.48  | 562  | 14 |
| P12004     | Proliferati67.4329502 | 14 | 25 | 14 | 28.8  | 4.69  | 519  | 14 |
| O95433     | Activator c41.7159763 | 12 | 17 | 12 | 38.3  | 5.53  | 401  | 12 |
| Q16822     | Phosphoenol 34.84375  | 17 | 19 | 17 | 70.7  | 7.62  | 404  | 17 |
| A0A140VJZ1 | Ubiquitinyl 27.972028 | 16 | 19 | 16 | 95.7  | 5.03  | 340  | 16 |
| A0A087X2I1 | 26S protea40.1985112  | 14 | 21 | 14 | 45.8  | 7.78  | 390  | 14 |
| Q14157     | Ubiquitin-22.5390984  | 14 | 19 | 14 | 114.5 | 7.11  | 322  | 14 |
| Q9Y2X3     | Nucleolar p32.5141777 | 13 | 17 | 13 | 59.5  | 8.92  | 344  | 13 |
| A0A024RBB7 | Nucleosome 22.5063939 | 8  | 17 | 6  | 45.3  | 4.46  | 346  | 8  |
| J3QQX2     | Rho GDP-di39.1489362  | 8  | 17 | 8  | 25.8  | 7.44  | 259  | 8  |
| A0A0S2Z3H3 | Solute car154.3624161 | 17 | 29 | 3  | 33    | 9.76  | 597  | 17 |
| Q00688     | Peptidyl-p39.2857143  | 9  | 17 | 9  | 25.2  | 9.28  | 294  | 9  |
| Q92688     | Acidic leuc32.6693227 | 13 | 28 | 7  | 28.8  | 4.06  | 522  | 13 |
| Q15436     | Protein tr26.0130719  | 15 | 18 | 13 | 86.1  | 7.08  | 435  | 15 |
| P29692     | Elongation 43.0604982 | 12 | 23 | 4  | 31.1  | 5.01  | 496  | 12 |
| P84098     | 60S riboson32.6530612 | 12 | 27 | 12 | 23.5  | 11.47 | 699  | 12 |
| Q13344     | Fus-like p16.6666667  | 10 | 22 | 8  | 53.3  | 9.42  | 438  | 10 |
| A0A0S2Z2Z6 | Annexin (F)21.1233284 | 16 | 21 | 16 | 75.8  | 5.6   | 445  | 16 |
| P38117     | Electron tr51.7647059 | 14 | 20 | 14 | 27.8  | 8.1   | 493  | 14 |
| P61981     | 14-3-3 prot64.3724696 | 16 | 27 | 10 | 28.3  | 4.89  | 361  | 16 |
| P62263     | 40S riboson43.0463576 | 10 | 27 | 10 | 16.3  | 10.05 | 511  | 10 |
| P35527     | Keratin, t31.7817014  | 13 | 16 | 13 | 62    | 5.24  | 426  | 13 |
| P16989     | Y-box-bindi43.8172043 | 13 | 21 | 6  | 40.1  | 9.77  | 339  | 13 |
| A0A140VK41 | Testicular 48.2866044 | 13 | 18 | 5  | 35    | 6.46  | 297  | 13 |
| P60891     | Ribose-pho45.2830189  | 14 | 20 | 6  | 34.8  | 6.98  | 303  | 14 |
| Q99623     | Prohibitin-41.4715719 | 10 | 17 | 10 | 33.3  | 9.83  | 594  | 10 |
| B2R6F3     | Splicing f46.3414634  | 10 | 28 | 9  | 19.3  | 11.65 | 412  | 10 |
| P62879     | Guanine nuc49.7058824 | 12 | 16 | 5  | 37.3  | 6     | 458  | 12 |
| P49321     | Nuclear aut 19.035533 | 10 | 18 | 10 | 85.2  | 4.3   | 472  | 10 |
| B2RB23     | cDNA, FLJ9446.3476071 | 13 | 19 | 13 | 42    | 8.25  | 376  | 13 |
| P52209     | 6-phosphogl37.0600414 | 14 | 22 | 14 | 53.1  | 7.23  | 500  | 14 |
| Q59ET0     | Glucan, br25.066313   | 15 | 17 | 15 | 86.1  | 6.93  | 286  | 15 |
| I3L2B0     | Clustered n16.2621359 | 15 | 18 | 2  | 138.1 | 6.04  | 273  | 15 |
| P62195     | 26S protea45.5665025  | 12 | 15 | 11 | 45.6  | 7.55  | 352  | 12 |
| P62906     | 60S riboson41.0138249 | 9  | 20 | 9  | 24.8  | 9.94  | 382  | 9  |
| Q15459     | Splicing f25.5989912  | 16 | 23 | 16 | 88.8  | 5.22  | 262  | 16 |
| Q9H4A4     | Aminopeptic30.4615385 | 15 | 18 | 15 | 72.5  | 5.74  | 350  | 15 |
| A8K9A4     | cDNA FLJ75133.6601307 | 13 | 29 | 3  | 33.6  | 5.14  | 704  | 13 |
| Q9BYX7     | Putative bc20.5333333 | 7  | 52 | 1  | 42    | 6.33  | 1233 | 7  |
| E7EX90     | Dynactin s19.0286624  | 14 | 19 | 14 | 139   | 5.67  | 293  | 14 |
| A0A0S2Z404 | Regulator c38.2743363 | 11 | 15 | 11 | 48.1  | 8.16  | 386  | 11 |
| Q14914     | Prostaglan42.8571429  | 9  | 17 | 9  | 35.8  | 8.29  | 252  | 9  |
| P30084     | Enoyl-CoA 143.1034483 | 10 | 15 | 10 | 31.4  | 8.07  | 490  | 10 |
| Q14444     | Caprin-1 O52.425952   | 11 | 16 | 11 | 78.3  | 5.25  | 232  | 11 |
| A0A024R056 | Guanine nuc43.8235294 | 12 | 16 | 7  | 37.4  | 6     | 269  | 12 |
| Q9NQC3     | Reticulon-48.30536913 | 5  | 13 | 5  | 129.9 | 4.5   | 307  | 5  |
| Q5VXV3     | SET OS=Homc42.4137931 | 10 | 20 | 10 | 33.5  | 4.32  | 350  | 10 |
| A0A0U5Q331 | MHC class 127.9452055 | 7  | 20 | 1  | 40.8  | 6.15  | 416  | 7  |
| B3KRM2     | Serine/thr49.1909385  | 11 | 15 | 11 | 35.5  | 5.43  | 341  | 11 |
| B2RD79     | cDNA, FLJ9435.6275304 | 14 | 16 | 14 | 56    | 5.3   | 316  | 14 |
| P52701     | DNA mismat17.3529412  | 17 | 19 | 17 | 152.7 | 6.9   | 335  | 17 |
| Q12904     | Aminoacyl 150.6410256 | 11 | 16 | 11 | 34.3  | 8.43  | 232  | 11 |
| B0AZQ4     | Structural 19.3919474 | 19 | 20 | 19 | 141.4 | 7.18  | 312  | 19 |
| A8K401     | Prohibitin,59.9264706 | 11 | 22 | 11 | 29.8  | 5.76  | 464  | 11 |

|            |             |              |    |    |    |       |       |     |    |
|------------|-------------|--------------|----|----|----|-------|-------|-----|----|
| P27694     | Replicatio  | 36.038961    | 13 | 19 | 13 | 68.1  | 7.21  | 322 | 13 |
| Q59EL4     | PRPF4 prote | 30.1675978   | 12 | 17 | 12 | 60    | 7.56  | 242 | 12 |
| A0A087WTP3 | Far upstrec | 27.0042194   | 13 | 18 | 12 | 73    | 7.71  | 297 | 13 |
| A0A0G2JH68 | Protein di  | 15.5660377   | 17 | 20 | 17 | 141.3 | 5.39  | 242 | 17 |
| P56537     | Eukaryotic  | 42.8571429   | 6  | 13 | 6  | 26.6  | 4.68  | 423 | 6  |
| A8K7D9     | Importin st | 28.3553875   | 13 | 24 | 13 | 57.8  | 5.4   | 528 | 13 |
| P40925     | Malate dehy | 48.2035928   | 15 | 22 | 15 | 36.4  | 7.36  | 520 | 15 |
| Q13151     | Heterogene  | 48.852459    | 12 | 15 | 10 | 30.8  | 9.29  | 320 | 12 |
| A0A140VK56 | Transaldol  | 47.1810089   | 17 | 27 | 17 | 37.5  | 6.81  | 542 | 17 |
| Q53HB3     | Proteasome  | 35.4545455   | 13 | 17 | 12 | 49.2  | 6.21  | 298 | 13 |
| P49773     | Histidine   | 178.5714286  | 6  | 13 | 6  | 13.8  | 6.95  | 180 | 6  |
| MOROR2     | 40S riboso  | 41.3333333   | 13 | 26 | 13 | 25.3  | 9.76  | 622 | 13 |
| V9HW91     | Epididymis  | 61.5942029   | 12 | 14 | 12 | 30.6  | 7.21  | 302 | 12 |
| A0A024R1S8 | LIM and SH  | 69.348659    | 16 | 30 | 16 | 29.7  | 7.05  | 234 | 16 |
| B1AHB0     | DNA helica  | 32.0163488   | 17 | 22 | 17 | 82.2  | 8.37  | 269 | 17 |
| A0A024R1K7 | Tyrosine 3- | 48.7804878   | 13 | 21 | 9  | 28.2  | 4.84  | 433 | 13 |
| Q9UHD8     | Septin-9    | 036.1774744  | 13 | 17 | 13 | 65.4  | 8.97  | 163 | 13 |
| Q12797     | Aspartyl/a  | 25.3298153   | 16 | 19 | 16 | 85.8  | 5.01  | 225 | 16 |
| A0A109NGN6 | Proteasome  | 46.473029    | 8  | 15 | 8  | 26.4  | 4.79  | 584 | 8  |
| O94925     | Glutaminas  | 24.2152466   | 10 | 12 | 8  | 73.4  | 7.77  | 267 | 10 |
| P62888     | 60S riboso  | 59.1304348   | 7  | 19 | 7  | 12.8  | 9.63  | 401 | 7  |
| P26373     | 60S riboso  | 45.971564    | 13 | 27 | 13 | 24.2  | 11.65 | 513 | 13 |
| P09382     | Galectin-1  | 65.9259259   | 8  | 22 | 8  | 14.7  | 5.5   | 550 | 8  |
| Q15366     | Poly(rC)-b  | i51.2328767  | 10 | 20 | 4  | 38.6  | 6.79  | 420 | 10 |
| Q9BXP5     | Serrate RN  | 17.5799087   | 15 | 19 | 15 | 100.6 | 5.96  | 189 | 15 |
| Q15019     | Septin-2    | 048.7534626  | 11 | 16 | 11 | 41.5  | 6.6   | 408 | 11 |
| F4ZW62     | NF45 OS=H   | on32.8205128 | 10 | 23 | 10 | 43    | 5.26  | 476 | 10 |
| J3KQ32     | Obg-like A  | 138.4615385  | 10 | 23 | 10 | 46.9  | 8.06  | 176 | 10 |
| A2VCK8     | Thymosin b  | 88.6363636   | 7  | 28 | 7  | 5.1   | 5.06  | 532 | 7  |
| P25398     | 40S riboso  | 60.6060606   | 8  | 19 | 8  | 14.5  | 7.21  | 590 | 8  |
| A0A024R2Q4 | Ribosomal   | r47.0588235  | 11 | 21 | 11 | 24.1  | 11.62 | 346 | 11 |
| P28331     | NADH-ubiqu  | 24.34663     | 13 | 15 | 13 | 79.4  | 6.23  | 298 | 13 |
| Q8NBJ5     | Procollage  | 26.6881029   | 14 | 22 | 14 | 71.6  | 7.31  | 423 | 14 |
| Q549N0     | Cofilin 2   | 170.4819277  | 11 | 18 | 6  | 18.7  | 7.88  | 318 | 11 |
| P21399     | Cytoplasmic | 23.5095613   | 14 | 18 | 14 | 98.3  | 6.68  | 183 | 14 |
| A0A140VJE8 | AP complex  | 24.3953733   | 17 | 22 | 15 | 105.6 | 5.34  | 331 | 17 |
| P31689     | DnaJ homol  | 34.0050378   | 11 | 18 | 11 | 44.8  | 7.08  | 265 | 11 |
| P02794     | Ferritin he | 62.8415301   | 12 | 19 | 12 | 21.2  | 5.55  | 208 | 12 |
| Q9H583     | HEAT repea  | 10.8675373   | 18 | 20 | 9  | 242.2 | 6.54  | 326 | 18 |
| P46087     | Probable 2  | f24.2610837  | 17 | 20 | 17 | 89.2  | 9.23  | 384 | 17 |
| B2R5M8     | Isocitrate  | 33.0917874   | 12 | 17 | 10 | 46.6  | 7.01  | 478 | 12 |
| P08708     | 40S riboso  | 60           | 8  | 18 | 8  | 15.5  | 9.85  | 324 | 8  |
| B3KS98     | Eukaryotic  | 37.9781421   | 10 | 17 | 10 | 41.6  | 7.33  | 336 | 10 |
| Q59GW6     | Acetyl-CoA  | 50           | 10 | 15 | 10 | 42.1  | 7.4   | 219 | 10 |
| P18085     | ADP-ribosyl | 53.3333333   | 9  | 18 | 5  | 20.5  | 7.14  | 350 | 9  |
| B2RD27     | cDNA, FLJ9  | f27.4691358  | 7  | 14 | 7  | 37    | 6.77  | 426 | 7  |
| P11387     | DNA topois  | 19.3464052   | 13 | 17 | 13 | 90.7  | 9.31  | 313 | 13 |
| E7EUC7     | UTP--gluco  | s30.3675048  | 11 | 15 | 11 | 57.8  | 8.13  | 379 | 11 |
| B4DS05     | cDNA FLJ59  | f27.9792746  | 10 | 18 | 8  | 44.1  | 4.7   | 378 | 10 |
| A0A0C4DGG9 | Chromodom   | i12.7000516  | 18 | 22 | 18 | 220.3 | 6.02  | 261 | 18 |
| Q8N163     | Cell cycle  | 21.7768147   | 12 | 14 | 12 | 102.8 | 5.22  | 281 | 12 |
| Q9NY33     | Dipeptidyl  | 25.78019     | 13 | 14 | 13 | 82.5  | 5.1   | 314 | 13 |
| O43684     | Mitotic chr | 38.4146341   | 11 | 16 | 11 | 37.1  | 6.84  | 322 | 11 |
| G3V1V0     | Myosin lig  | 55.2795031   | 8  | 18 | 8  | 18    | 4.77  | 462 | 8  |
| O15143     | Actin-rela  | t37.3655914  | 13 | 18 | 12 | 40.9  | 8.35  | 176 | 13 |
| P46063     | ATP-depend  | e29.4298921  | 14 | 15 | 14 | 73.4  | 7.88  | 258 | 14 |
| Q59ED7     | Putative ur | 27.696793    | 14 | 18 | 14 | 77.7  | 5.64  | 297 | 14 |
| Q9Y6C9     | Mitochondr  | i35.3135314  | 10 | 17 | 2  | 33.3  | 7.97  | 253 | 10 |
| A0A024R7B7 | CDC37 cell  | 35.7142857   | 11 | 17 | 11 | 44.4  | 5.25  | 240 | 11 |
| Q5T5C7     | Serine--tr  | n28.358209   | 12 | 19 | 12 | 61.3  | 7.06  | 313 | 12 |
| HOY7A7     | Calmodulin  | 48.1283422   | 8  | 21 | 8  | 20.7  | 4.36  | 549 | 8  |
| P46776     | 60S riboso  | 33.1081081   | 8  | 16 | 8  | 16.6  | 11    | 316 | 8  |
| O43776     | Asparagine- | 26.459854    | 12 | 15 | 12 | 62.9  | 6.25  | 287 | 12 |
| A8K897     | Nuclear por | t23.3211233  | 14 | 18 | 14 | 93.3  | 5.77  | 298 | 14 |
| A0A140VJK1 | Testicular  | 41.1940299   | 12 | 16 | 12 | 37.4  | 5.39  | 297 | 12 |
| J3KN16     | KIAA0368    | 010.8577095  | 16 | 17 | 16 | 223.6 | 8.75  | 235 | 16 |
| Q5U5J2     | CSNK2A1 pr  | c35.2644836  | 10 | 12 | 9  | 45.9  | 7.96  | 279 | 10 |
| P27635     | 60S riboso  | 45.3271028   | 10 | 20 | 10 | 24.6  | 10.08 | 412 | 10 |
| P14550     | Alcohol de  | 40.6153846   | 10 | 16 | 9  | 36.6  | 6.79  | 280 | 10 |
| MOQZM1     | Heterogene  | 49.0861619   | 15 | 18 | 1  | 40    | 6.73  | 417 | 15 |
| P55084     | Trifunctio  | r38.3966245  | 11 | 14 | 11 | 51.3  | 9.41  | 218 | 11 |
| P23921     | Ribonucleo  | s25.3787879  | 14 | 19 | 14 | 90    | 7.15  | 220 | 14 |
| Q96AG4     | Leucine-ric | 45.276873    | 10 | 14 | 10 | 34.9  | 9.57  | 301 | 10 |

|            |                       |             |    |    |    |       |       |     |    |
|------------|-----------------------|-------------|----|----|----|-------|-------|-----|----|
| A0A087X1W2 | Protein arg           | 46.6666667  | 10 | 14 | 1  | 32.7  | 5.68  | 347 | 10 |
| P62269     | 40S ribosom           | 62.5        | 15 | 26 | 15 | 17.7  | 10.99 | 512 | 15 |
| P48594     | Serpin B4 (32.5641026 |             | 15 | 18 | 3  | 44.8  | 6.21  | 412 | 15 |
| Q53Y97     | Thymidylate           | 50.4792332  | 9  | 21 | 9  | 35.7  | 7.01  | 234 | 9  |
| P43686     | 26S proteas           | 41.8660287  | 12 | 19 | 12 | 47.3  | 5.21  | 215 | 12 |
| P12081     | Histidine             | 31.237721   | 14 | 15 | 14 | 57.4  | 5.88  | 382 | 14 |
| B2R5M9     | cDNA, FLJ9            | 24.34663    | 14 | 16 | 14 | 83.5  | 7.02  | 231 | 14 |
| B2R4C0     | 60S ribosom           | 42.6136364  | 12 | 28 | 12 | 20.7  | 10.71 | 441 | 12 |
| Q81YD1     | Eukaryotic            | 20.5414013  | 10 | 21 | 1  | 68.8  | 5.43  | 301 | 10 |
| P61106     | Ras-relatec           | 65.1162791  | 10 | 14 | 9  | 23.9  | 6.21  | 260 | 10 |
| Q14498     | RNA-binding           | 33.0188679  | 12 | 16 | 12 | 59.3  | 10.1  | 345 | 12 |
| P45880     | Voltage-dep           | 42.5170068  | 11 | 18 | 10 | 31.5  | 7.56  | 372 | 11 |
| A0A0B4J2C3 | Translatior           | 63.4517766  | 10 | 20 | 10 | 22.6  | 5.24  | 362 | 10 |
| A8K2T7     | Receptor pi           | 13.2231405  | 12 | 15 | 12 | 134.1 | 6.7   | 317 | 12 |
| P62316     | Small nucle           | 67.7966102  | 9  | 23 | 9  | 13.5  | 9.91  | 293 | 9  |
| P38606     | V-type prot           | 25.6077796  | 11 | 15 | 11 | 68.3  | 5.52  | 183 | 11 |
| Q9NTJ3     | Structural            | 18.2453416  | 20 | 20 | 20 | 147.1 | 6.79  | 251 | 20 |
| P84085     | ADP-ribosy            | 153.3333333 | 8  | 18 | 3  | 20.5  | 6.79  | 259 | 8  |
| A0A140VK69 | Aspartate             | 38.4987893  | 11 | 15 | 11 | 46.2  | 7.01  | 151 | 11 |
| P42224     | Signal trar           | 23.2        | 15 | 16 | 15 | 87.3  | 6.05  | 313 | 15 |
| P61586     | Transformir           | 46.6321244  | 10 | 19 | 8  | 21.8  | 6.1   | 389 | 10 |
| A0A024R1Q8 | Ribosomal r           | 53.5714286  | 10 | 18 | 10 | 14.9  | 10.51 | 367 | 10 |
| B3KX96     | cDNA FLJ45            | 33.7883959  | 11 | 25 | 1  | 32.3  | 5.14  | 678 | 11 |
| H7BY55     | Complement            | 25.6363636  | 12 | 20 | 12 | 58.9  | 8.78  | 299 | 12 |
| Q2NL82     | Pre-rRNA-p            | 18.9054726  | 13 | 16 | 13 | 91.8  | 7.42  | 274 | 13 |
| Q597H1     | Transformat           | 31.2182741  | 7  | 13 | 7  | 42.8  | 5.82  | 217 | 7  |
| Q43242     | 26S protea            | 27.340824   | 12 | 16 | 12 | 60.9  | 8.44  | 365 | 12 |
| Q549M8     | CLE7 OS=Hon           | 48.3606557  | 9  | 14 | 9  | 28.1  | 6.65  | 339 | 9  |
| Q9UHB9     | Signal rec            | 26.6347687  | 12 | 13 | 12 | 70.7  | 8.56  | 286 | 12 |
| Q9UNM6     | 26S protea            | 36.4361702  | 11 | 16 | 11 | 42.9  | 5.81  | 397 | 11 |
| A0A024QZS4 | Peptidyl-p            | 48.7922705  | 6  | 13 | 5  | 22    | 9.38  | 246 | 6  |
| Q59EF6     | Calpain 2,            | 17.1467764  | 11 | 16 | 11 | 83.1  | 5.06  | 278 | 11 |
| P54727     | UV excisior           | 29.8288509  | 11 | 17 | 10 | 43.1  | 4.84  | 310 | 11 |
| A0A0S2Z5M8 | ElaC homol            | 25.3026634  | 12 | 14 | 12 | 92.2  | 7.9   | 111 | 12 |
| Q12792     | Twinfilin-1           | 27.1428571  | 9  | 11 | 8  | 40.3  | 6.96  | 356 | 9  |
| 000425     | Insulin-li            | 28.8428325  | 13 | 17 | 12 | 63.7  | 8.87  | 425 | 13 |
| Q9Y2W1     | Thyroid hoi           | 18.2198953  | 12 | 18 | 12 | 108.6 | 10.15 | 177 | 12 |
| Q8WVX7     | Ribosomal r           | 54.1401274  | 12 | 26 | 12 | 17.3  | 10.52 | 451 | 12 |
| P38159     | RNA-binding           | 36.3171355  | 18 | 24 | 18 | 42.3  | 10.05 | 320 | 18 |
| Q53Z07     | NPC-A-16 O            | 66.6666667  | 9  | 15 | 9  | 21.9  | 9.95  | 262 | 9  |
| Q6FHX6     | Flap endon            | 34.2105263  | 8  | 12 | 8  | 42.6  | 8.62  | 248 | 8  |
| A0A024QZP7 | Cell divisi           | 52.1885522  | 13 | 19 | 11 | 34.1  | 8.4   | 287 | 13 |
| Q07021     | Complement            | 33.6879433  | 7  | 11 | 7  | 31.3  | 4.84  | 210 | 7  |
| B3KY60     | cDNA FLJ16            | 20.4488778  | 13 | 15 | 13 | 92.2  | 8.18  | 275 | 13 |
| Q9NUU7     | ATP-depend            | 33.4728033  | 13 | 16 | 2  | 53.9  | 6.58  | 283 | 13 |
| E7EPK1     | Septin-7 O            | 30.8924485  | 10 | 13 | 9  | 50.7  | 8.63  | 243 | 10 |
| P42166     | Lamina-ass            | 20.7492795  | 11 | 17 | 2  | 75.4  | 7.66  | 310 | 11 |
| E9PCR7     | 2-oxogluta            | 19.3641618  | 15 | 17 | 15 | 117.6 | 6.92  | 211 | 15 |
| Q8TEQ6     | Gem-associ            | 13.3952255  | 14 | 15 | 14 | 168.5 | 6.62  | 247 | 14 |
| V9HW35     | Epididymis            | 76.5432099  | 12 | 20 | 12 | 17    | 7.24  | 221 | 12 |
| Q9Y3E8     | CGI-150 pr            | 24.6031746  | 11 | 15 | 4  | 55    | 8.7   | 326 | 11 |
| 014745     | Na(+)/H(+)            | 53.9106145  | 13 | 17 | 13 | 38.8  | 5.77  | 229 | 13 |
| Q9H0A0     | RNA cytid             | 17.3658537  | 13 | 17 | 13 | 115.7 | 8.27  | 287 | 13 |
| P50995     | Annexin A1            | 127.1287129 | 12 | 16 | 12 | 54.4  | 7.65  | 347 | 12 |
| B4DZF2     | cDNA FLJ59            | 25.2040816  | 20 | 21 | 20 | 110.2 | 7.94  | 218 | 20 |
| P26368     | Splicing f            | 28.4210526  | 8  | 16 | 8  | 53.5  | 9.09  | 262 | 8  |
| Q9UG63     | ATP-binding           | 19.4221509  | 11 | 15 | 11 | 71.2  | 7.37  | 301 | 11 |
| Q95782     | AP-2 comple           | 17.2978506  | 12 | 15 | 8  | 107.5 | 7.03  | 296 | 12 |
| P49720     | Proteasome            | 58.0487805  | 11 | 16 | 11 | 22.9  | 6.55  | 294 | 11 |
| Q96P70     | Importin-9            | 17.7713737  | 13 | 15 | 13 | 115.9 | 4.81  | 326 | 13 |
| P55809     | Succinyl-C            | 24.2307692  | 10 | 13 | 10 | 56.1  | 7.46  | 293 | 10 |
| Q16401     | 26S protea            | 31.3492063  | 11 | 11 | 11 | 56.2  | 5.48  | 314 | 11 |
| 000429     | Dynamin-1-l           | 24.048913   | 11 | 13 | 11 | 81.8  | 6.81  | 322 | 11 |
| Q9BS26     | Endoplasmic           | 37.9310345  | 10 | 15 | 9  | 46.9  | 5.26  | 245 | 10 |
| P54819     | Adenylate             | 152.3012552 | 10 | 18 | 10 | 26.5  | 7.81  | 409 | 10 |
| A0A1C7CYX9 | Dihydropyr            | 27.9172821  | 13 | 14 | 13 | 73.5  | 6.35  | 266 | 13 |
| P55010     | Eukaryotic            | 26.6821346  | 10 | 18 | 10 | 49.2  | 5.58  | 309 | 10 |
| P61019     | Ras-relatec           | 56.6037736  | 9  | 12 | 9  | 23.5  | 6.54  | 312 | 9  |
| G3V5Z7     | Proteasome            | 39.6825397  | 14 | 17 | 14 | 28.1  | 6.76  | 356 | 14 |
| P30520     | Adenylosucc           | 29.6052632  | 11 | 14 | 11 | 50.1  | 6.55  | 300 | 11 |
| 060832     | H/ACA ribor           | 28.5992218  | 11 | 15 | 11 | 57.6  | 9.42  | 140 | 11 |
| B2R665     | cDNA, FLJ9            | 28.021978   | 13 | 18 | 13 | 59.2  | 4.36  | 254 | 13 |
| Q9P287     | BRCA2 and             | (34.3949045 | 7  | 10 | 7  | 36    | 4.61  | 328 | 7  |

|            |               |              |    |    |    |       |       |     |    |
|------------|---------------|--------------|----|----|----|-------|-------|-----|----|
| Q9Y2B0     | Protein car   | 63.7362637   | 9  | 13 | 9  | 20.6  | 4.92  | 221 | 9  |
| Q99615     | DnaJ homolc   | 23.8866397   | 9  | 12 | 9  | 56.4  | 6.96  | 254 | 9  |
| P20618     | Proteasome    | 46.0580913   | 10 | 13 | 10 | 26.5  | 8.13  | 156 | 10 |
| P00387     | NADH-cytocl   | 44.8504983   | 10 | 13 | 10 | 34.2  | 7.59  | 206 | 10 |
| Q14573     | Inositol 1,8. | 16173718     | 14 | 15 | 14 | 303.9 | 6.48  | 205 | 14 |
| D3DTH7     | Myosin IC,    | 20.4176334   | 13 | 15 | 1  | 98.9  | 9.42  | 230 | 13 |
| P49721     | Proteasome    | 45.2736318   | 12 | 19 | 12 | 22.8  | 7.02  | 238 | 12 |
| Q81Y81     | pre-rRNA p1   | 7.2373081    | 11 | 14 | 11 | 96.5  | 8.4   | 239 | 11 |
| V9HW12     | Epididymis    | 58.5858586   | 13 | 23 | 12 | 21.9  | 5.97  | 360 | 13 |
| AOA140VJJ2 | S-formylgl    | 47.5177305   | 9  | 11 | 9  | 31.4  | 7.02  | 242 | 9  |
| Q13619     | Cullin-4A     | (28.1949934  | 17 | 20 | 11 | 87.6  | 8.13  | 272 | 17 |
| Q15050     | Ribosome bi   | 39.4520548   | 13 | 16 | 13 | 41.2  | 10.7  | 321 | 13 |
| BOYIW6     | Archain 1,    | 29.1666667   | 14 | 16 | 14 | 61.6  | 5.85  | 291 | 14 |
| AOA024QZK8 | Heterogene    | 39.8843931   | 12 | 17 | 10 | 36.9  | 6.87  | 329 | 12 |
| H3BQK0     | ATP-depend    | 31.4049587   | 12 | 15 | 1  | 54.5  | 7.87  | 267 | 12 |
| Q6FGH5     | RPS21 prote   | 65.060241    | 6  | 9  | 6  | 9.1   | 8.5   | 393 | 6  |
| J3QQ67     | 60S ribosom   | 50           | 12 | 21 | 12 | 21.8  | 11.72 | 487 | 12 |
| H7C2Q8     | EBNA1 bindi   | 31.8559557   | 13 | 21 | 13 | 40.7  | 9.98  | 412 | 13 |
| AOA024R3W7 | Eukaryotic    | 45.3333333   | 9  | 12 | 9  | 24.7  | 4.67  | 323 | 9  |
| O60568     | Procollager   | 21.00271     | 12 | 14 | 12 | 84.7  | 6.05  | 339 | 12 |
| Q16629     | Serine/argi   | 38.2352941   | 10 | 18 | 9  | 27.4  | 11.82 | 261 | 10 |
| Q13057     | Bifunctione   | 26.0638298   | 11 | 15 | 11 | 62.3  | 6.99  | 201 | 11 |
| A8KAQ5     | cDNA FLJ77    | 40.9610984   | 15 | 25 | 15 | 51.5  | 10.01 | 205 | 15 |
| Q13247     | Serine/argi   | 22.3837209   | 8  | 14 | 5  | 39.6  | 11.43 | 328 | 8  |
| V9GYM8     | Rho guaninc   | 18.0407371   | 12 | 16 | 12 | 116   | 7.37  | 203 | 12 |
| O60488     | Long-chain    | 23.0661041   | 10 | 15 | 8  | 79.1  | 8.38  | 194 | 10 |
| P62633     | Cellular nu   | 44.6327684   | 7  | 11 | 7  | 19.5  | 7.71  | 322 | 7  |
| O00629     | Importin st   | 29.1746641   | 9  | 14 | 6  | 57.9  | 4.96  | 148 | 9  |
| Q6FIG4     | RAB1B prote   | 51.7412935   | 9  | 17 | 4  | 22.2  | 5.73  | 428 | 9  |
| P32004     | Neural cell   | 111.2967383  | 11 | 14 | 11 | 139.9 | 6.24  | 275 | 11 |
| Q27J81     | Inverted fc   | 13.9311449   | 12 | 14 | 12 | 135.5 | 5.38  | 309 | 12 |
| Q13185     | Chromobox     | 37.1584699   | 7  | 14 | 6  | 20.8  | 5.33  | 376 | 7  |
| P62244     | 40S ribosom   | 73.8461538   | 10 | 18 | 10 | 14.8  | 10.13 | 339 | 10 |
| P30043     | Flavin red    | 49.5145631   | 8  | 12 | 8  | 22.1  | 7.65  | 339 | 8  |
| B2R774     | cDNA, FLJ9    | 28.627451    | 11 | 13 | 10 | 57.5  | 6.77  | 139 | 11 |
| P25788     | Proteasome    | 46.2745098   | 11 | 15 | 11 | 28.4  | 5.33  | 390 | 11 |
| Q9NSD9     | Phenylalani   | 26.3157895   | 14 | 16 | 14 | 66.1  | 6.84  | 153 | 14 |
| Q5T9B7     | Adenylate     | 30.952381    | 6  | 9  | 6  | 23.4  | 8.6   | 224 | 6  |
| V9HWH9     | Protein S1    | (56.1904762  | 7  | 26 | 7  | 11.7  | 7.12  | 648 | 7  |
| O00159     | Unconventic   | 16.5569144   | 13 | 14 | 1  | 121.6 | 9.41  | 223 | 13 |
| AOA0KOK1L8 | Epididymis    | 54.6184739   | 11 | 16 | 11 | 28.7  | 6.02  | 255 | 11 |
| Q13423     | NAD(P) trar   | 17.3112339   | 13 | 14 | 13 | 113.8 | 8.09  | 244 | 13 |
| Q53FE8     | cDNA FLJ36    | 35.6756757   | 10 | 13 | 10 | 40.5  | 5.14  | 298 | 10 |
| Q12874     | Splicing fe   | 28.5429142   | 10 | 14 | 10 | 58.8  | 5.38  | 234 | 10 |
| B3KMR5     | cDNA FLJ12    | 11.8735544   | 12 | 14 | 12 | 143.6 | 8.75  | 276 | 12 |
| Q14315     | Filamin-C     | (4.55045872  | 11 | 17 | 1  | 290.8 | 5.97  | 419 | 11 |
| Q5U016     | H. sapiens    | 154.1463415  | 11 | 17 | 6  | 22.7  | 6.21  | 498 | 11 |
| P08754     | Guanine nuc   | 29.6610169   | 9  | 11 | 5  | 40.5  | 5.69  | 340 | 9  |
| AOA140VKA6 | Testis sect   | 25.4742547   | 8  | 15 | 8  | 41.3  | 5.27  | 279 | 8  |
| Q15008     | 26S protea    | 38.3033419   | 13 | 15 | 13 | 45.5  | 5.62  | 225 | 13 |
| P51149     | Ras-relate    | 60.8695652   | 10 | 16 | 10 | 23.5  | 6.7   | 313 | 10 |
| P58546     | Myotrophin    | 66.9491525   | 5  | 8  | 5  | 12.9  | 5.52  | 248 | 5  |
| A8K5Y7     | cDNA FLJ78    | 15.6976744   | 15 | 17 | 15 | 136.2 | 5.9   | 191 | 15 |
| P61160     | Actin-relat   | 26.3959391   | 10 | 17 | 9  | 44.7  | 6.74  | 323 | 10 |
| K7EJV9     | 60S ribosom   | 42.3529412   | 13 | 26 | 3  | 19.4  | 10.48 | 353 | 13 |
| Q8WX93     | Palladin      | 0510.1952278 | 10 | 12 | 10 | 150.5 | 7.09  | 206 | 10 |
| O75340     | Programmed    | 65.9685864   | 10 | 13 | 10 | 21.9  | 5.4   | 360 | 10 |
| AOA024R608 | Ribosomal     | 357.0175439  | 3  | 9  | 1  | 11.5  | 4.32  | 205 | 3  |
| V9HW58     | Epididymis    | 29.3103448   | 9  | 14 | 9  | 44.8  | 5.17  | 214 | 9  |
| P08243     | Asparagine    | 26.3814617   | 12 | 16 | 12 | 64.3  | 6.86  | 227 | 12 |
| Q9Y383     | Putative R    | 28.5714286   | 10 | 14 | 6  | 46.5  | 10.01 | 293 | 10 |
| P14324     | Farnesyl p    | 20.7637232   | 7  | 11 | 7  | 48.2  | 6.15  | 257 | 7  |
| P30419     | Glycylpepti   | 25.4032258   | 10 | 13 | 10 | 56.8  | 7.8   | 253 | 10 |
| Q9P0L0     | Vesicle-as    | 36.9477912   | 8  | 17 | 8  | 27.9  | 8.62  | 311 | 8  |
| Q13501     | Sequestoson   | 34.7727273   | 9  | 9  | 9  | 47.7  | 5.22  | 144 | 9  |
| O95831     | Apoptosis-i   | 27.7324633   | 12 | 12 | 12 | 66.9  | 8.95  | 258 | 12 |
| E9PL71     | Elongation    | 45.9893048   | 9  | 18 | 1  | 20.8  | 5.01  | 369 | 9  |
| P43246     | DNA mismat    | 17.3447537   | 13 | 13 | 13 | 104.7 | 5.77  | 254 | 13 |
| Q14764     | Major vault   | 22.5083987   | 13 | 14 | 13 | 99.3  | 5.48  | 205 | 13 |
| B2RBE5     | cDNA, FLJ9    | 22.6327945   | 17 | 20 | 17 | 101.2 | 7.42  | 206 | 17 |
| P33316     | Deoxyuridir   | 39.2857143   | 8  | 12 | 8  | 26.5  | 9.36  | 307 | 8  |
| AOA0S2Z3Y1 | Lectin gal    | 21.7094017   | 10 | 13 | 10 | 65.3  | 5.27  | 260 | 10 |
| O75367     | Core histor   | 36.0215054   | 9  | 13 | 9  | 39.6  | 9.79  | 294 | 9  |

|            |               |             |    |    |    |       |       |     |    |
|------------|---------------|-------------|----|----|----|-------|-------|-----|----|
| Q9NZL4     | Hsp70-binding | 39.5027624  | 10 | 13 | 10 | 39.4  | 5.21  | 253 | 10 |
| Q12769     | Nuclear por   | 11.7688022  | 11 | 11 | 11 | 162   | 5.5   | 176 | 11 |
| Q93009     | Ubiquitin c   | 16.061706   | 13 | 14 | 13 | 128.2 | 5.55  | 195 | 13 |
| P63313     | Thymosin be   | 81.8181818  | 5  | 19 | 5  | 5     | 5.36  | 380 | 5  |
| X5DNM4     | Lactoylglut   | 46.7391304  | 8  | 17 | 8  | 20.8  | 5.31  | 232 | 8  |
| Q53F64     | Heterogene    | 31.3253012  | 11 | 17 | 10 | 36    | 7.42  | 346 | 11 |
| P49189     | 4-trimethyl   | 29.1497976  | 12 | 15 | 12 | 53.8  | 5.87  | 193 | 12 |
| Q96DG6     | Carboxymet    | 47.755102   | 10 | 16 | 10 | 28    | 7.18  | 339 | 10 |
| O00116     | Alkyldihyd    | 27.5075988  | 11 | 13 | 11 | 72.9  | 7.34  | 164 | 11 |
| B2R7T6     | cDNA, FLJ9    | 36.4444444  | 11 | 11 | 11 | 49.9  | 9.06  | 166 | 11 |
| Q01469     | Fatty acid    | 72.5925926  | 10 | 12 | 10 | 15.2  | 7.01  | 98  | 10 |
| P62847     | 40S ribosom   | 36.0902256  | 6  | 16 | 6  | 15.4  | 10.78 | 294 | 6  |
| D2CFK9     | Nucleolar (   | 24.6056782  | 13 | 14 | 13 | 73.9  | 9.5   | 204 | 13 |
| Q01081     | Splicing fe   | 27.9166667  | 5  | 13 | 5  | 27.9  | 8.81  | 256 | 5  |
| E9PMS6     | LIM domain    | 13.5686275  | 12 | 13 | 12 | 145.3 | 7.3   | 274 | 12 |
| P61221     | ATP-binding   | 27.8797997  | 13 | 14 | 13 | 67.3  | 8.34  | 250 | 13 |
| P20674     | Cytochrome    | 33.3333333  | 6  | 11 | 5  | 16.8  | 6.79  | 258 | 6  |
| Q09161     | Nuclear cap   | 16.3291139  | 9  | 12 | 9  | 91.8  | 6.43  | 230 | 9  |
| P31150     | Rab GDP di    | 25.5033557  | 9  | 11 | 4  | 50.6  | 5.14  | 240 | 9  |
| AOA0A0MRM9 | Nucleolar ε   | 19.0677966  | 15 | 26 | 15 | 74.6  | 9.47  | 321 | 15 |
| P62280     | 40S ribosom   | 59.4936709  | 12 | 23 | 12 | 18.4  | 10.3  | 357 | 12 |
| Q6FHV6     | ENO2 protei   | 32.0276498  | 8  | 28 | 6  | 47.2  | 5.03  | 714 | 8  |
| AOA024QZQ2 | Prosaposin    | 28.0534351  | 14 | 17 | 14 | 58.1  | 5.17  | 183 | 14 |
| O75531     | Barrier-to-   | 68.5393258  | 8  | 13 | 8  | 10.1  | 6.09  | 218 | 8  |
| P08559     | Pyruvate de   | 35.3846154  | 10 | 13 | 10 | 43.3  | 8.06  | 299 | 10 |
| E9PIE4     | Mitochondri   | 34.7328244  | 9  | 14 | 1  | 28.5  | 7.61  | 216 | 9  |
| Q92804     | TATA-bindin   | 15.8783784  | 7  | 13 | 5  | 61.8  | 8.02  | 239 | 7  |
| A8K984     | Structural    | 12.2807018  | 12 | 13 | 12 | 135.5 | 8.43  | 266 | 12 |
| O95757     | Heat shock    | 15.2562574  | 10 | 13 | 7  | 94.5  | 5.88  | 427 | 10 |
| P35268     | 60S ribosom   | 57.03125    | 8  | 14 | 1  | 14.8  | 9.19  | 335 | 8  |
| P32322     | Pyrroline-ε   | 38.5579937  | 9  | 11 | 8  | 33.3  | 7.61  | 195 | 9  |
| P52907     | F-actin-cap   | 42.6573427  | 7  | 13 | 6  | 32.9  | 5.69  | 312 | 7  |
| AOA087X1Z3 | Proteasome    | 36.2204724  | 8  | 13 | 8  | 29.1  | 6.71  | 192 | 8  |
| AOA024R1V4 | 60S ribosom   | 54.4117647  | 9  | 19 | 9  | 15.8  | 10.56 | 201 | 9  |
| V9HW29     | Kinesin-li    | 17.0301142  | 12 | 13 | 12 | 109.6 | 6.51  | 309 | 12 |
| Q99536     | Synaptic ve   | 33.8422392  | 10 | 12 | 10 | 41.9  | 6.29  | 176 | 10 |
| AOA0S2Z5I7 | Shwachman-f   | 38.4        | 8  | 12 | 8  | 28.7  | 8.75  | 153 | 8  |
| AOA140VJZ4 | Ubiquitin c   | 47.3913043  | 7  | 11 | 7  | 26.2  | 4.92  | 174 | 7  |
| Q8WWM7     | Ataxin-2-li   | 17.5813953  | 13 | 14 | 13 | 113.3 | 8.59  | 177 | 13 |
| P31350     | Ribonucleos   | 37.0179949  | 11 | 13 | 11 | 44.8  | 5.38  | 211 | 11 |
| F8W727     | 60S ribosom   | 47.7124183  | 9  | 17 | 9  | 18    | 10.59 | 194 | 9  |
| Q9Y295     | Development   | 38.9645777  | 12 | 15 | 12 | 40.5  | 8.9   | 268 | 12 |
| B3KQ33     | cDNA FLJ32    | 15.8186864  | 12 | 17 | 12 | 118.7 | 4.96  | 278 | 12 |
| Q08ET0     | Cell prolif   | 28.515625   | 7  | 9  | 7  | 28.9  | 9.36  | 292 | 7  |
| Q9NR45     | Sialic acic   | 31.1977716  | 8  | 13 | 8  | 40.3  | 6.74  | 267 | 8  |
| P19623     | Spermidine    | 41.3907285  | 8  | 13 | 8  | 33.8  | 5.49  | 257 | 8  |
| A8K548     | cDNA FLJ75    | 9.38053097  | 6  | 9  | 6  | 119.6 | 4.34  | 294 | 6  |
| B2R7T8     | cDNA, FLJ9    | 51.1029412  | 10 | 12 | 10 | 30.6  | 6     | 158 | 10 |
| K7ELL7     | Glucosidase   | 21.4953271  | 12 | 16 | 12 | 60.2  | 4.41  | 399 | 12 |
| P46783     | 40S ribosom   | 40          | 8  | 27 | 8  | 18.9  | 10.15 | 521 | 8  |
| AOA087WYT3 | Prostagland   | 32.9268293  | 5  | 12 | 5  | 19.1  | 4.55  | 367 | 5  |
| P49790     | Nuclear por   | 10.3050847  | 10 | 11 | 10 | 153.8 | 8.73  | 236 | 10 |
| Q16630     | Cleavage ar   | 13.0671506  | 5  | 9  | 5  | 59.2  | 7.15  | 259 | 5  |
| O60701     | UDP-glucose   | 30.9716599  | 12 | 13 | 12 | 55    | 7.12  | 235 | 12 |
| J3KTL2     | Serine/argi   | 57.312253   | 13 | 32 | 12 | 28.3  | 10.08 | 336 | 13 |
| P16104     | Histone H2/   | 32.1678322  | 5  | 23 | 2  | 15.1  | 10.74 | 461 | 5  |
| Q9UJZ1     | Stomatin-li   | 37.3595506  | 8  | 12 | 8  | 38.5  | 7.39  | 231 | 8  |
| P16070     | CD44 antige   | 9.43396226  | 8  | 16 | 8  | 81.5  | 5.33  | 530 | 8  |
| P68036     | Ubiquitin-c   | 55.1948052  | 7  | 12 | 7  | 17.9  | 8.51  | 176 | 7  |
| B2R983     | cDNA, FLJ9    | 49.7925311  | 12 | 17 | 12 | 27.5  | 6.6   | 216 | 12 |
| B4E163     | Serine/thre   | 46.3687151  | 7  | 13 | 1  | 20.9  | 8.22  | 356 | 7  |
| B2RAH7     | cDNA, FLJ9    | 22.1126761  | 11 | 14 | 11 | 80.7  | 5.86  | 181 | 11 |
| P43034     | Platelet-ac   | 26.5853659  | 9  | 10 | 8  | 46.6  | 7.37  | 149 | 9  |
| B2RBS8     | cDNA, FLJ9    | 24.7947455  | 15 | 56 | 15 | 69.3  | 6.28  | 617 | 15 |
| B2R627     | cDNA, FLJ9    | 12.392755   | 8  | 9  | 8  | 114.4 | 5.82  | 177 | 8  |
| Q53GL6     | RNA binding   | 49.1856678  | 11 | 17 | 11 | 32.5  | 9.17  | 176 | 11 |
| AOMNN4     | CDW3/SMU1     | (22.8070175 | 9  | 11 | 9  | 57.5  | 7.18  | 188 | 9  |
| P14923     | Junction pl   | 19.4630872  | 9  | 13 | 9  | 81.7  | 6.14  | 311 | 9  |
| Q8NI36     | WD repeat-c   | 14.3007361  | 9  | 12 | 9  | 105.3 | 7.53  | 283 | 9  |
| AOA1L7NY41 | Polypeptide   | 25.2542373  | 11 | 14 | 11 | 66.4  | 8.25  | 249 | 11 |
| P04040     | Catalase Oε   | 20.4933586  | 9  | 11 | 9  | 59.7  | 7.39  | 116 | 9  |
| AOA024RDF6 | Heterogene    | 24.7619048  | 11 | 15 | 8  | 46.4  | 9.57  | 242 | 11 |
| Q7L1Q6     | Basic leuci   | 30.3102625  | 17 | 26 | 14 | 48    | 5.92  | 388 | 17 |



|             |                        |    |    |    |       |       |      |    |
|-------------|------------------------|----|----|----|-------|-------|------|----|
| P60903      | Protein S1(45.3608247  | 3  | 21 | 3  | 11.2  | 7.37  | 569  | 3  |
| P53985      | Monocarboxy 7.2        | 5  | 11 | 5  | 53.9  | 8.66  | 227  | 5  |
| Q55T80      | FLOT1 protc33.7236534  | 10 | 11 | 10 | 47.3  | 7.49  | 187  | 10 |
| Q14683      | Structural 15.8150852  | 16 | 17 | 16 | 143.1 | 7.64  | 123  | 16 |
| L0R849      | Alternative12.1134021  | 9  | 16 | 1  | 42.3  | 5.92  | 383  | 9  |
| P23634      | Plasma memt11.8452861  | 10 | 12 | 4  | 137.8 | 6.6   | 254  | 10 |
| P09622      | Dihydrolipc27.3084479  | 12 | 17 | 12 | 54.1  | 7.85  | 227  | 12 |
| B4E263      | cDNA FLJ53f12.3445826  | 10 | 12 | 1  | 127.5 | 6.52  | 199  | 10 |
| O14975      | Very long-c24.1935484  | 11 | 14 | 11 | 70.3  | 8.51  | 88   | 11 |
| P55036      | 26S proteas35.0132626  | 8  | 9  | 8  | 40.7  | 4.79  | 276  | 8  |
| O75832      | 26S proteas37.6106195  | 8  | 11 | 8  | 24.4  | 6.1   | 151  | 8  |
| J3QRS3      | Myosin regt49.1525424  | 8  | 10 | 8  | 20.4  | 4.75  | 292  | 8  |
| Q9UMX0      | Ubiquilin-114.4312394  | 6  | 11 | 3  | 62.5  | 5.11  | 236  | 6  |
| Q6FGS1      | TPD52L2 prc66.5048544  | 8  | 9  | 8  | 22.2  | 5.36  | 190  | 8  |
| A8K6U7      | cDNA FLJ78f13.0841121  | 9  | 10 | 9  | 95.6  | 6.92  | 220  | 9  |
| Q9UJS0      | Calcium-bir 25.037037  | 12 | 15 | 7  | 74.1  | 8.62  | 219  | 12 |
| Q14690      | Protein RRI10.3153394  | 16 | 18 | 16 | 208.6 | 8.87  | 136  | 16 |
| Q6DD88      | Atlastin-3 26.8022181  | 9  | 11 | 9  | 60.5  | 5.66  | 168  | 9  |
| Q8TCS8      | Polyribonuc16.9859515  | 10 | 13 | 10 | 85.9  | 7.77  | 224  | 10 |
| Q9H3K6      | Bola-like p72.0930233  | 5  | 8  | 5  | 10.1  | 6.52  | 230  | 5  |
| P13647      | Keratin, tjl3.8983051  | 11 | 20 | 3  | 62.3  | 7.74  | 314  | 11 |
| Q96I24      | Far upstre 33.041958   | 12 | 15 | 11 | 61.6  | 8.38  | 162  | 12 |
| P40222      | Alpha-taxil 30.03663   | 10 | 13 | 9  | 61.9  | 6.52  | 292  | 10 |
| H7BY10      | 60S riboson48.1012658  | 12 | 19 | 2  | 17.8  | 10.45 | 353  | 12 |
| Q02818      | Nucleobindi28.6334056  | 12 | 13 | 11 | 53.8  | 5.25  | 170  | 12 |
| P07741      | Adenine phc51.6666667  | 7  | 13 | 7  | 19.6  | 6.02  | 406  | 7  |
| Q9NYF8      | Bcl-2-assoc14.8913043  | 10 | 11 | 1  | 106.1 | 9.98  | 164  | 10 |
| Q59FD4      | Hexokinase 16.7544784  | 13 | 14 | 12 | 105.7 | 6.84  | 300  | 13 |
| A6NEM2      | Host cell f 6.875      | 11 | 15 | 11 | 213.3 | 7.33  | 214  | 11 |
| P61163      | Alpha-centi28.7234043  | 8  | 16 | 5  | 42.6  | 6.64  | 194  | 8  |
| Q13724      | Mannosyl-ol14.4563919  | 9  | 14 | 9  | 91.9  | 8.9   | 204  | 9  |
| O75390      | Citrate syr28.3261803  | 10 | 20 | 10 | 51.7  | 8.32  | 357  | 10 |
| P06396      | Gelsolin O10.6138107   | 5  | 10 | 5  | 85.6  | 6.28  | 153  | 5  |
| Q93008      | Probable ut5.40856031  | 11 | 13 | 11 | 292.1 | 5.8   | 216  | 11 |
| Q12996      | Cleavage st18.4100418  | 8  | 9  | 8  | 82.9  | 8.12  | 212  | 8  |
| Q5LJA5      | Ubiquitin c47.3239437  | 10 | 13 | 10 | 40.4  | 5.34  | 193  | 10 |
| P49589      | Cysteine-114.7058824   | 9  | 14 | 9  | 85.4  | 6.76  | 135  | 9  |
| P25815      | Protein S1(38.9473684  | 5  | 9  | 5  | 10.4  | 4.88  | 338  | 5  |
| J3KN66      | Torsin-1A-i22.0367279  | 9  | 11 | 8  | 67.8  | 7.9   | 244  | 9  |
| P35659      | Protein DEF30.9333333  | 11 | 15 | 11 | 42.6  | 8.56  | 211  | 11 |
| O95816      | BAG family 54.9763033  | 8  | 10 | 8  | 23.8  | 6.7   | 197  | 8  |
| Q9NZB2      | Constitutiv14.8479428  | 11 | 11 | 11 | 121.8 | 8.88  | 197  | 11 |
| X5DR09      | General tr 12.5250501  | 10 | 16 | 10 | 112.3 | 6.39  | 147  | 10 |
| P02760      | Protein AME26.1363636  | 7  | 51 | 7  | 39    | 6.25  | 608  | 7  |
| X6RBG4      | Uromodulin 19.4484761  | 14 | 82 | 14 | 75.6  | 5.87  | 1336 | 14 |
| AOA1BOGW77  | Alpha-aminc 24.368231  | 10 | 10 | 10 | 60    | 8.18  | 271  | 10 |
| B2RBEO      | cDNA, FLJ9f20.8333333  | 9  | 14 | 7  | 80.3  | 8.46  | 175  | 9  |
| P55735      | Protein SEC31.9875776  | 6  | 7  | 6  | 35.5  | 5.48  | 207  | 6  |
| O60502      | Protein O-( 17.139738  | 12 | 16 | 12 | 102.8 | 4.91  | 155  | 12 |
| Q6IRT1      | S-(hydroxyn22.9946524  | 7  | 10 | 7  | 39.7  | 7.49  | 152  | 7  |
| P11177      | Pyruvate dc35.6545961  | 9  | 13 | 9  | 39.2  | 6.65  | 288  | 9  |
| E9PAV3      | Nascent pol 2.1174206  | 4  | 12 | 4  | 205.3 | 9.58  | 398  | 4  |
| H9ZYJ2      | Thioredoxir56.1904762  | 6  | 17 | 6  | 11.7  | 4.92  | 273  | 6  |
| A8K394      | cDNA FLJ76f26.5258216  | 13 | 20 | 1  | 97    | 5.05  | 79   | 13 |
| O15031      | Plexin-B2 (7.18171926  | 9  | 11 | 7  | 205   | 6.24  | 98   | 9  |
| B4E1U9      | cDNA FLJ54f46.1864407  | 7  | 14 | 6  | 26.5  | 7.59  | 376  | 7  |
| Q6IBSO      | Twinfilin-221.4899713  | 5  | 8  | 4  | 39.5  | 6.84  | 187  | 5  |
| H7BY58      | Protein-L-i30.0699301  | 7  | 11 | 7  | 30.3  | 6.73  | 232  | 7  |
| B3KRV5      | cDNA FLJ12f12.0471014  | 10 | 11 | 10 | 122.8 | 5.85  | 211  | 10 |
| Q9UKS6      | Protein kir19.3396226  | 6  | 8  | 6  | 48.5  | 6.18  | 202  | 6  |
| Q9BTTO      | Acidic leuc25.3731343  | 6  | 9  | 6  | 30.7  | 3.85  | 323  | 6  |
| Q9BZZ5      | Apoptosis i21.3740458  | 9  | 12 | 9  | 59    | 7.34  | 322  | 9  |
| A1L0T0      | Acetolactat16.7721519  | 6  | 9  | 6  | 67.8  | 8.15  | 164  | 6  |
| AOA024RBEB8 | Solute carri33.5180055 | 12 | 17 | 12 | 39.9  | 9.36  | 319  | 12 |
| P26358      | DNA (cytosi8.41584158  | 11 | 11 | 11 | 183.1 | 7.75  | 139  | 11 |
| O14929      | Histone acc23.8663484  | 7  | 8  | 7  | 49.5  | 5.69  | 259  | 7  |
| P28074      | Proteasome 30.7984791  | 8  | 11 | 8  | 28.5  | 6.92  | 299  | 8  |
| P52948      | Nuclear por6.82443588  | 11 | 13 | 11 | 197.5 | 6.4   | 279  | 11 |
| Q59G24      | Activated f47.0149254  | 9  | 12 | 9  | 15.1  | 9.38  | 304  | 9  |
| AOA14OVJF4  | Biliverdin 31.7567568  | 9  | 12 | 9  | 33.4  | 6.44  | 230  | 9  |
| Q99471      | Prefoldin f64.9350649  | 8  | 10 | 8  | 17.3  | 6.33  | 224  | 8  |
| HOYKD8      | 60S riboson34.1176471  | 9  | 20 | 9  | 19.1  | 11.46 | 390  | 9  |
| P11172      | Uridine 5' - 20        | 7  | 11 | 7  | 52.2  | 7.24  | 191  | 7  |

|            |                       |    |    |    |       |       |     |    |
|------------|-----------------------|----|----|----|-------|-------|-----|----|
| B2R791     | cdNA, FLJ917.5695461  | 9  | 10 | 9  | 77.5  | 9.5   | 180 | 9  |
| A4D105     | Replicatio            | 4  | 7  | 4  | 13.6  | 5.08  | 153 | 4  |
| A8K5U9     | cdNA FLJ75(13.3435583 | 7  | 9  | 6  | 70.7  | 7.62  | 266 | 7  |
| O00764     | Pyridoxal 122.1153846 | 6  | 10 | 6  | 35.1  | 6.13  | 242 | 6  |
| AOMNP2     | CDW11/WDR5737.8151261 | 8  | 9  | 8  | 39.3  | 8.1   | 86  | 8  |
| Q14247     | Src substr            | 13 | 13 | 13 | 61.5  | 5.4   | 170 | 13 |
| P20020     | Plasma mem            | 9  | 11 | 3  | 138.7 | 6.04  | 268 | 9  |
| P30046     | D-dopachro            | 7  | 12 | 7  | 12.7  | 7.3   | 261 | 7  |
| B4DWX3     | Importin st           | 10 | 11 | 3  | 60.5  | 5.02  | 236 | 10 |
| V9HW41     | Epididymis            | 8  | 13 | 8  | 17.1  | 6.57  | 178 | 8  |
| P42766     | 60S riboso            | 6  | 13 | 6  | 14.5  | 11.05 | 296 | 6  |
| O43681     | ATPase ASN/           | 11 | 15 | 11 | 38.8  | 4.91  | 166 | 11 |
| P61254     | 60S riboso            | 12 | 26 | 3  | 17.2  | 10.55 | 365 | 12 |
| P46781     | 40S riboso            | 15 | 28 | 15 | 22.6  | 10.65 | 358 | 15 |
| A8K9U0     | cdNA FLJ78235.1648352 | 8  | 9  | 8  | 40.3  | 7.08  | 156 | 8  |
| K7ER17     | 60S riboso            | 8  | 14 | 1  | 11.2  | 6.8   | 307 | 8  |
| Q96EE3     | Nucleoporin           | 5  | 8  | 5  | 39.6  | 8.09  | 112 | 5  |
| Q15645     | Pachytene c           | 7  | 9  | 7  | 48.5  | 6.09  | 233 | 7  |
| Q86V81     | THO comple            | 5  | 12 | 5  | 26.9  | 11.15 | 149 | 5  |
| Q9BTE3     | Mini-chrom            | 12 | 14 | 12 | 72.9  | 5.87  | 101 | 12 |
| B2R960     | cdNA, FLJ9243.9446367 | 9  | 10 | 9  | 32.2  | 4.96  | 134 | 9  |
| P62249     | 40S riboso            | 9  | 21 | 9  | 16.4  | 10.21 | 499 | 9  |
| Q9BQA1     | Methylosom            | 7  | 9  | 7  | 36.7  | 5.17  | 124 | 7  |
| P62495     | Eukaryotic            | 10 | 12 | 10 | 49    | 5.71  | 229 | 10 |
| Q09028     | Histone-bir           | 9  | 11 | 4  | 47.6  | 4.89  | 198 | 9  |
| P51148     | Ras-relate            | 9  | 12 | 5  | 23.5  | 8.41  | 378 | 9  |
| Q9UKY7     | Protein CD            | 5  | 8  | 5  | 27.3  | 6.4   | 147 | 5  |
| Q14019     | Coactosin-1           | 7  | 9  | 7  | 15.9  | 5.67  | 202 | 7  |
| P17301     | Integrin al           | 9  | 12 | 3  | 129.2 | 5.31  | 250 | 9  |
| E9PK91     | Bcl-2-assoc           | 10 | 11 | 1  | 100.3 | 9.95  | 164 | 10 |
| Q96PZ0     | Pseudourid            | 8  | 9  | 8  | 75    | 6.37  | 129 | 8  |
| O94776     | Metastasis-           | 12 | 13 | 11 | 75    | 9.66  | 162 | 12 |
| Q15785     | Mitochondri           | 7  | 9  | 7  | 34.5  | 8.98  | 191 | 7  |
| Q15942     | Zyxin OS=Hc           | 8  | 13 | 8  | 61.2  | 6.67  | 82  | 8  |
| Q14684     | Ribosomal F           | 9  | 13 | 9  | 84.4  | 9.76  | 83  | 9  |
| P42285     | Superkiller           | 10 | 12 | 10 | 117.7 | 6.52  | 172 | 10 |
| P52888     | Thimet olig           | 11 | 12 | 11 | 78.8  | 6.05  | 237 | 11 |
| B1AKJ5     | Nardilysin            | 11 | 14 | 11 | 139.3 | 5     | 214 | 11 |
| Q6NUK1     | Calcium-bir           | 12 | 14 | 12 | 53.3  | 6.33  | 211 | 12 |
| B3KSH1     | Eukaryotic            | 9  | 10 | 9  | 39.1  | 5.45  | 247 | 9  |
| P36542     | ATP synthas           | 7  | 11 | 7  | 33    | 9.22  | 257 | 7  |
| AOA024R4E5 | High densiti          | 10 | 10 | 10 | 141.4 | 6.87  | 201 | 10 |
| J3KPP4     | Cisplatin r           | 8  | 9  | 8  | 58.2  | 9.92  | 209 | 8  |
| AOA140VJX1 | Testicular            | 8  | 14 | 8  | 45.2  | 8.85  | 248 | 8  |
| A6NHL2     | Tubulin al            | 7  | 14 | 1  | 49.9  | 6.05  | 323 | 7  |
| P35270     | Sepiapterin           | 6  | 7  | 6  | 28    | 8.05  | 312 | 6  |
| E7ETY2     | Treacle prc           | 11 | 13 | 11 | 152.2 | 8.85  | 188 | 11 |
| B4DUC8     | S-methyl-5'           | 6  | 8  | 4  | 33.2  | 7.46  | 127 | 6  |
| AOA140VK53 | Testicular            | 12 | 13 | 12 | 299.4 | 12.06 | 154 | 12 |
| V9HWA6     | Epididymis            | 8  | 10 | 7  | 18.5  | 7.85  | 271 | 8  |
| V9HW44     | Epididymis            | 6  | 9  | 6  | 25.6  | 5.92  | 160 | 6  |
| Q02750     | Dual specif           | 10 | 11 | 5  | 43.4  | 6.62  | 225 | 10 |
| O75475     | PC4 and SF            | 10 | 14 | 8  | 60.1  | 9.13  | 129 | 10 |
| Q96PK6     | RNA-binding           | 9  | 9  | 9  | 69.4  | 9.67  | 157 | 9  |
| P51812     | Ribosomal p           | 11 | 13 | 7  | 83.7  | 6.89  | 213 | 11 |
| P53992     | Protein tr            | 12 | 13 | 12 | 118.2 | 7.06  | 177 | 12 |
| P52895     | Aldo-keto r           | 8  | 14 | 5  | 36.7  | 7.49  | 148 | 8  |
| AOA024QZY1 | JTV1 gene,            | 9  | 11 | 9  | 35.3  | 8.22  | 195 | 9  |
| B4DUT8     | Calponin O            | 7  | 10 | 7  | 35.9  | 7.3   | 206 | 7  |
| H7BZJ3     | Protein di            | 6  | 13 | 1  | 13.5  | 7.3   | 382 | 6  |
| Q8NFB4     | Nucleoporin           | 6  | 9  | 6  | 36.7  | 5.92  | 210 | 6  |
| Q92522     | Histone H1            | 7  | 10 | 7  | 22.5  | 10.76 | 166 | 7  |
| Q5TB52     | 3'-phospho            | 8  | 10 | 7  | 69.5  | 8.03  | 220 | 8  |
| Q59GW7     | Replicatio            | 8  | 12 | 8  | 39.6  | 7.81  | 149 | 8  |
| Q96KP4     | Cytosolic r           | 12 | 15 | 12 | 52.8  | 5.97  | 146 | 12 |
| P60866     | 40S riboso            | 8  | 16 | 7  | 13.4  | 9.94  | 274 | 8  |
| Q14008     | Cytoskelet            | 11 | 11 | 11 | 225.4 | 7.8   | 90  | 11 |
| AOA0KOK1K7 | 6-phosphog            | 8  | 12 | 8  | 27.5  | 6.05  | 97  | 8  |
| Q6FHG5     | Gamma-synu            | 5  | 8  | 5  | 13.3  | 4.86  | 213 | 5  |
| Q96IR7     | 4-hydroxyp            | 9  | 9  | 9  | 39.4  | 7.03  | 229 | 9  |
| P61289     | Proteasome            | 8  | 12 | 8  | 29.5  | 5.95  | 309 | 8  |
| Q9NYU2     | UDP-glucos            | 9  | 10 | 9  | 177.1 | 5.63  | 75  | 9  |
| Q6PKG0     | La-related            | 7  | 9  | 7  | 123.4 | 8.82  | 170 | 7  |

|            |             |             |    |    |    |       |       |     |    |
|------------|-------------|-------------|----|----|----|-------|-------|-----|----|
| P09661     | U2 small nu | 34.1176471  | 9  | 10 | 9  | 28.4  | 8.62  | 195 | 9  |
| Q96B97     | SH3 domain  | 15.1879699  | 7  | 8  | 7  | 73.1  | 6.62  | 204 | 7  |
| A0A0F7NGI8 | Leucine ric | 15.8244681  | 9  | 10 | 9  | 82.6  | 4.61  | 143 | 9  |
| O60264     | SWI/SNF-re  | 112.7376426 | 13 | 14 | 13 | 121.8 | 8.09  | 176 | 13 |
| B2RDP6     | cDNA, FLJ9  | 23.3183857  | 6  | 8  | 6  | 49.4  | 4.92  | 151 | 6  |
| Q9GZT3     | SRA stem-lc | 77.9816514  | 7  | 10 | 7  | 12.3  | 10.24 | 222 | 7  |
| Q15369     | Elongin-C   | (58.9285714 | 5  | 8  | 5  | 12.5  | 4.78  | 268 | 5  |
| A0A024RDG1 | Vesicle doc | 11.6424116  | 9  | 10 | 9  | 107.8 | 4.91  | 188 | 9  |
| Q05519     | Serine/argi | 15.2892562  | 5  | 8  | 5  | 53.5  | 10.52 | 175 | 5  |
| P99999     | Cytochrome  | 57.1428571  | 7  | 13 | 7  | 11.7  | 9.57  | 218 | 7  |
| P51571     | Translocon  | 37.5722543  | 5  | 13 | 5  | 19    | 6.15  | 284 | 5  |
| O14776     | Transcripti | 2.8415301   | 12 | 15 | 12 | 123.8 | 8.65  | 156 | 12 |
| P26196     | Probable A1 | 22.3602484  | 8  | 10 | 7  | 54.4  | 8.66  | 254 | 8  |
| Q61BR2     | FARSLA prot | 30.511811   | 9  | 14 | 9  | 57.5  | 7.8   | 239 | 9  |
| P08779     | Keratin, t  | 18.1818182  | 12 | 17 | 2  | 51.2  | 5.05  | 269 | 12 |
| P30040     | Endoplasmic | 38.3141762  | 11 | 16 | 11 | 29    | 7.31  | 251 | 11 |
| O43615     | Mitochondri | 17.2566372  | 7  | 9  | 7  | 51.3  | 8.32  | 243 | 7  |
| A0A0A0MSW4 | Phosphatidy | 40.9594096  | 9  | 12 | 7  | 31.6  | 6.87  | 138 | 9  |
| K7EM18     | Eukaryotic  | 75.2066116  | 7  | 8  | 4  | 13.6  | 7.9   | 95  | 7  |
| Q66MV3     | Putative pe | 37.1428571  | 3  | 7  | 3  | 15.8  | 9.1   | 79  | 3  |
| Q99584     | Protein S1  | (57.1428571 | 5  | 10 | 5  | 11.5  | 6.16  | 277 | 5  |
| B4DP80     | NAD(P)H-hy  | 26.7100977  | 7  | 10 | 7  | 33.6  | 8.73  | 136 | 7  |
| P16083     | Ribosylidih | 46.3203463  | 7  | 9  | 7  | 25.9  | 6.29  | 203 | 7  |
| P63151     | Serine/thre | 22.8187919  | 8  | 9  | 8  | 51.7  | 6.2   | 192 | 8  |
| O76071     | Probable cy | 31.8584071  | 7  | 8  | 7  | 37.8  | 4.97  | 200 | 7  |
| Q00059     | Transcripti | 22.3577236  | 6  | 9  | 6  | 29.1  | 9.72  | 168 | 6  |
| Q01650     | Large neut  | 18.48126233 | 4  | 8  | 4  | 55    | 7.72  | 272 | 4  |
| Q1KMD3     | Heterogene  | 38.5756359  | 7  | 8  | 7  | 85.1  | 4.91  | 226 | 7  |
| A0A024R6I3 | Testicular  | 29.2237443  | 7  | 9  | 7  | 25    | 7.44  | 177 | 7  |
| A0A0A0MRI2 | Sorting ne  | 21.0526316  | 6  | 7  | 6  | 47.8  | 6.43  | 185 | 6  |
| Q9NZ45     | CDGSH iron  | 59.2592593  | 7  | 10 | 7  | 12.2  | 9.09  | 197 | 7  |
| O75821     | Eukaryotic  | 37.1875     | 9  | 12 | 9  | 35.6  | 6.13  | 173 | 9  |
| V9HWJ1     | Glutathione | 27.8481013  | 10 | 11 | 10 | 52.4  | 5.92  | 188 | 10 |
| Q96CT7     | Coiled-coil | 31.3901345  | 6  | 10 | 6  | 25.8  | 9.54  | 202 | 6  |
| I3L3Q4     | Glyoxalase  | 40.0881057  | 8  | 10 | 1  | 25.5  | 7.01  | 212 | 8  |
| Q68D38     | Putative ur | 28.968254   | 4  | 6  | 2  | 28    | 5.8   | 200 | 4  |
| E7ESP4     | Integrin al | 10.9341826  | 7  | 10 | 1  | 102.8 | 5.15  | 225 | 7  |
| A0A0B4J2E5 | Uncharacter | 15.2339499  | 9  | 13 | 8  | 102.4 | 6.2   | 169 | 9  |
| B4DEE8     | cDNA FLJ56  | (25.210084  | 4  | 7  | 4  | 25    | 8.66  | 226 | 4  |
| Q96CW1     | AP-2 comple | 22.7586207  | 8  | 9  | 8  | 49.6  | 9.54  | 143 | 8  |
| O75396     | Vesicle-tr  | 37.2093023  | 7  | 9  | 7  | 24.6  | 6.92  | 237 | 7  |
| Q96EN8     | Molybdenum  | 13.5135135  | 9  | 12 | 9  | 98.1  | 6.7   | 107 | 9  |
| Q5TDG3     | WD repeat   | 11.2407211  | 8  | 9  | 8  | 106   | 6.64  | 197 | 8  |
| BOLPF3     | Growth fact | 43.7788018  | 8  | 10 | 8  | 25.2  | 6.32  | 206 | 8  |
| A8KA19     | cDNA FLJ75  | (10.2910603 | 7  | 9  | 7  | 109.8 | 5.39  | 206 | 7  |
| Q9H8H0     | Nucleolar p | 15.0208623  | 7  | 10 | 7  | 81.1  | 6.07  | 117 | 7  |
| P28070     | Proteasome  | 28.030303   | 6  | 11 | 6  | 29.2  | 5.97  | 231 | 6  |
| J3KNF8     | Cytochrome  | 52          | 5  | 9  | 5  | 16.7  | 4.97  | 132 | 5  |
| A6NHR9     | Structural  | 7.680798    | 12 | 12 | 12 | 226.2 | 7.3   | 114 | 12 |
| P37108     | Signal rece | 64.7058824  | 6  | 9  | 6  | 14.6  | 10.04 | 178 | 6  |
| P36507     | Dual specif | 19          | 8  | 11 | 3  | 44.4  | 6.55  | 224 | 8  |
| Q6IA86     | Elongator c | 17.433414   | 10 | 11 | 10 | 92.4  | 5.96  | 205 | 10 |
| A0A0S2Z4Z6 | Serine/argi | 7.73420479  | 5  | 8  | 5  | 103.9 | 11.84 | 311 | 5  |
| B2RDF5     | cDNA, FLJ9  | (15.15625   | 9  | 10 | 9  | 71.1  | 5.29  | 197 | 9  |
| P34896     | Serine hyd  | 18.2194617  | 8  | 10 | 8  | 53    | 7.71  | 221 | 8  |
| Q06210     | Glutamine   | 14.4492132  | 7  | 8  | 7  | 78.8  | 7.11  | 200 | 7  |
| P47813     | Eukaryotic  | 45.1388889  | 7  | 13 | 7  | 16.5  | 5.24  | 281 | 7  |
| Q9UK76     | Hematologic | 37.6623377  | 3  | 8  | 3  | 16    | 5.6   | 149 | 3  |
| Q96FQ6     | Protein S1  | (58.2524272 | 8  | 10 | 8  | 11.8  | 6.79  | 141 | 8  |
| Q16222     | UDP-N-acet  | 22.0306513  | 9  | 10 | 9  | 58.7  | 6.33  | 191 | 9  |
| A0A140VJP2 | Testicular  | 34.4311377  | 7  | 8  | 7  | 37.5  | 7.36  | 261 | 7  |
| A4D2P0     | Ras-relate  | 37.9146919  | 9  | 15 | 8  | 23.5  | 8.63  | 217 | 9  |
| Q9UNX3     | 60S riboso  | 45.5172414  | 10 | 21 | 1  | 17.2  | 10.55 | 284 | 10 |
| K7ELC2     | 40S riboso  | 38.1578947  | 3  | 12 | 3  | 17.7  | 10.39 | 119 | 3  |
| Q9NXH9     | tRNA (guan  | 19.8786039  | 11 | 13 | 11 | 72.2  | 7.64  | 175 | 11 |
| P25685     | DnaJ homol  | 33.2352941  | 10 | 11 | 9  | 38    | 8.63  | 253 | 10 |
| A0A024R0R4 | SUMO-1 acti | 26.8786127  | 8  | 11 | 8  | 38.4  | 5.3   | 155 | 8  |
| E9PGZ1     | Caldesmon   | (20.3358209 | 8  | 8  | 8  | 61.7  | 6.11  | 164 | 8  |
| Q15418     | Ribosomal p | 18.5034014  | 10 | 12 | 6  | 82.7  | 7.83  | 193 | 10 |
| B2R806     | Eukaryotic  | 31.011236   | 14 | 16 | 14 | 52.2  | 6.04  | 189 | 14 |
| Q5HYL6     | Putative ur | 36.6477273  | 8  | 10 | 8  | 39.5  | 5.19  | 103 | 8  |
| A0A140VJMO | Testicular  | 9.80019029  | 8  | 10 | 8  | 116.5 | 6.77  | 166 | 8  |
| Q59GI2     | Liver phos  | 19          | 5  | 10 | 1  | 44.2  | 8.76  | 131 | 5  |

|            |              |              |    |    |    |       |       |     |    |
|------------|--------------|--------------|----|----|----|-------|-------|-----|----|
| Q16795     | NADH dehyd   | 29.1777188   | 9  | 10 | 9  | 42.5  | 9.8   | 162 | 9  |
| P10620     | Microsomal   | 12.2580645   | 4  | 6  | 4  | 17.6  | 9.39  | 114 | 4  |
| P04899     | Guanine nuc  | 25.3521127   | 7  | 8  | 2  | 40.4  | 5.54  | 184 | 7  |
| P00492     | Hypoxanthir  | 37.1559633   | 8  | 11 | 8  | 24.6  | 6.68  | 244 | 8  |
| MQQXB4     | Coatomer p   | 32.9305136   | 6  | 7  | 6  | 36.9  | 5.16  | 184 | 6  |
| Q9NX58     | Cell growt   | 25.5936675   | 9  | 10 | 9  | 43.6  | 9.54  | 100 | 9  |
| Q8NI27     | THO comple   | 8.09792844   | 11 | 11 | 11 | 182.7 | 8.44  | 142 | 11 |
| G1UI16     | SCC-112 pr   | 10.0224383   | 11 | 12 | 10 | 150.7 | 7.91  | 284 | 11 |
| Q15370     | Elongin-B    | (52.5423729  | 6  | 12 | 6  | 13.1  | 4.88  | 131 | 6  |
| MOR2B7     | DNA polyme   | 12.7978817   | 12 | 12 | 12 | 126.3 | 7.21  | 247 | 12 |
| Q9NW13     | RNA-binding  | 15.4150198   | 10 | 12 | 10 | 85.7  | 9.22  | 165 | 10 |
| B1AHD1     | NHP2-like    | r39.3939394  | 6  | 9  | 6  | 14.6  | 8.46  | 186 | 6  |
| Q9Y5M8     | Signal recc  | 32.8413284   | 7  | 8  | 7  | 29.7  | 9.04  | 192 | 7  |
| Q9UKD2     | mRNA turno   | v33.0543933  | 8  | 10 | 8  | 27.5  | 8.29  | 122 | 8  |
| P82979     | SAP domain   | -37.6190476  | 8  | 10 | 8  | 23.7  | 6.42  | 283 | 8  |
| Q6FGZ3     | EPHX1 prote  | 27.4725275   | 7  | 10 | 7  | 52.9  | 7.25  | 76  | 7  |
| P21964     | Catechol O   | -24.3542435  | 4  | 7  | 4  | 30    | 5.47  | 115 | 4  |
| Q59FR8     | Galectin (f  | 27.5193798   | 6  | 10 | 6  | 27.1  | 8.41  | 200 | 6  |
| Q08257     | Quinone oxi  | 27.9635258   | 5  | 6  | 5  | 35.2  | 8.44  | 177 | 5  |
| Q13045     | Protein flil | 11.1111111   | 11 | 11 | 11 | 144.7 | 6.05  | 182 | 11 |
| A8K6D2     | cDNA FLJ7    | 640.5737705  | 7  | 10 | 7  | 26.7  | 9.17  | 189 | 7  |
| P84090     | Enhancer o   | f60.5769231  | 7  | 11 | 7  | 12.3  | 5.92  | 177 | 7  |
| Q13596     | Sorting ne   | v20.3065134  | 9  | 10 | 7  | 59    | 5.15  | 193 | 9  |
| V5YQL4     | Adenosylho   | n7.61334474  | 8  | 12 | 5  | 130.8 | 6.77  | 199 | 8  |
| O75400     | Pre-mRNA-p   | i10.553814   | 7  | 9  | 7  | 108.7 | 7.56  | 170 | 7  |
| Q9Y6E2     | Basic leuci  | 21.9570406   | 9  | 13 | 6  | 48.1  | 6.68  | 283 | 9  |
| Q9NY61     | Protein AA   | 113.2142857  | 5  | 7  | 5  | 63.1  | 4.94  | 213 | 5  |
| Q8WU90     | Zinc finger  | 18.5446009   | 7  | 8  | 7  | 48.6  | 5.31  | 186 | 7  |
| O94973     | AP-2 comple  | 10.543131    | 6  | 9  | 2  | 103.9 | 6.96  | 212 | 6  |
| Q8WTT2     | Nucleolar    | c12.125      | 7  | 8  | 7  | 92.5  | 9.17  | 126 | 7  |
| Q9H7B2     | Ribosome p   | 21.5686275   | 6  | 9  | 6  | 35.6  | 9.99  | 144 | 6  |
| O60869     | Endothelial  | 48.6486486   | 7  | 11 | 7  | 16.4  | 9.95  | 214 | 7  |
| E9PAU2     | Ribonucleo   | p14.9470899  | 6  | 9  | 6  | 79.5  | 8.92  | 159 | 6  |
| Q14651     | Plastin-1    | (13.8314785  | 7  | 11 | 3  | 70.2  | 5.41  | 272 | 7  |
| A8K878     | Mesencepha   | l35.1351351  | 6  | 9  | 6  | 21.1  | 8.92  | 98  | 6  |
| Q8WUM0     | Nuclear por  | 7.95847751   | 5  | 7  | 5  | 128.9 | 5.1   | 163 | 5  |
| P50402     | Emerin OS    | =37.4015748  | 7  | 7  | 7  | 29    | 5.5   | 232 | 7  |
| Q6FGH9     | DNCL1 prote  | 51.6853933   | 5  | 8  | 5  | 10.4  | 7.4   | 218 | 5  |
| A8K964     | cDNA FLJ7    | 5(15.2022315 | 8  | 12 | 8  | 81.5  | 7.37  | 146 | 8  |
| A0A0C4DGG5 | Calpain sme  | 53.7267081   | 10 | 13 | 10 | 33.8  | 6.23  | 120 | 10 |
| A0A140T9T7 | Antigen pe   | p11.1386139  | 5  | 7  | 5  | 87.1  | 8.02  | 143 | 5  |
| D6RDG3     | Transcript   | i54.1284404  | 4  | 11 | 1  | 11.8  | 5.9   | 353 | 4  |
| P61604     | 10 kDa heat  | 75.4901961   | 9  | 19 | 5  | 10.9  | 8.92  | 374 | 9  |
| A0A0A6GYL2 | Sulfotrans   | f35.2159468  | 6  | 8  | 4  | 34.8  | 5.83  | 127 | 6  |
| Q6FG99     | RPLP1 prote  | 57.0175439   | 3  | 7  | 1  | 11.6  | 4.37  | 149 | 3  |
| P48507     | Glutamate    | --21.1678832 | 4  | 7  | 4  | 30.7  | 6.02  | 245 | 4  |
| P10515     | Dihydrolip   | c20.0927357  | 7  | 9  | 7  | 69    | 7.84  | 126 | 7  |
| B2RDQ3     | cDNA, FLJ9   | c37.5        | 9  | 10 | 9  | 33.7  | 11.25 | 174 | 9  |
| Q03701     | CCAAT/enh    | 9.58254269   | 8  | 11 | 8  | 120.9 | 5.94  | 105 | 8  |
| Q13148     | TAR DNA-b    | ir25.8454106 | 7  | 8  | 7  | 44.7  | 6.19  | 181 | 7  |
| Q16643     | Drebrin OS   | =15.2542373  | 6  | 6  | 6  | 71.4  | 4.45  | 133 | 6  |
| P55327     | Tumor prote  | c31.25       | 4  | 5  | 3  | 24.3  | 4.83  | 135 | 4  |
| A8K517     | Ribosomal    | r54.5454545  | 8  | 14 | 8  | 15.8  | 10.49 | 263 | 8  |
| P51572     | B-cell recc  | 26.0162602   | 6  | 9  | 6  | 28    | 8.44  | 218 | 6  |
| Q14527     | Helicase-l   | i10.3072349  | 6  | 8  | 6  | 113.9 | 8.6   | 144 | 6  |
| P48735     | Isocitrate   | 23.2300885   | 10 | 11 | 8  | 50.9  | 8.69  | 139 | 10 |
| Q7L5N1     | COP9 signa   | l39.1437309  | 8  | 9  | 8  | 36.1  | 5.73  | 47  | 8  |
| Q99961     | Endophilin   | -22.0108696  | 6  | 6  | 6  | 41.5  | 5.43  | 171 | 6  |
| P40261     | Nicotinami   | c50.3787879  | 8  | 11 | 8  | 29.6  | 5.74  | 162 | 8  |
| P48960     | CD97 antige  | l13.5329341  | 7  | 8  | 6  | 91.8  | 6.87  | 128 | 7  |
| P61326     | Protein mag  | 44.5205479   | 6  | 9  | 1  | 17.2  | 6.11  | 104 | 6  |
| P30876     | DNA-direct   | c9.54003407  | 9  | 9  | 9  | 133.8 | 6.87  | 101 | 9  |
| P28838     | Cytosol ami  | 21.194605    | 7  | 7  | 7  | 56.1  | 7.93  | 166 | 7  |
| O43324     | Eukaryotic   | 46.5517241   | 6  | 12 | 6  | 19.8  | 8.54  | 188 | 6  |
| O00469     | Procollage   | r13.568521   | 8  | 8  | 8  | 84.6  | 6.71  | 147 | 8  |
| B4E0Y9     | Serine/thre  | 30.1369863   | 8  | 11 | 7  | 49.2  | 5.68  | 133 | 8  |
| P62834     | Ras-relate   | c41.3043478  | 7  | 10 | 2  | 21    | 6.67  | 258 | 7  |
| D6RAX7     | COP9 const   | i23.0952381  | 7  | 8  | 7  | 47.7  | 6.43  | 147 | 7  |
| B4E0X1     | Beta-2-mic   | r36.8852459  | 4  | 10 | 4  | 13.9  | 7.44  | 199 | 4  |
| Q9UN52     | COP9 signa   | l15.3664303  | 4  | 7  | 4  | 47.8  | 6.65  | 140 | 4  |
| Q9NXF1     | Testis-expr  | i7.85791173  | 5  | 7  | 5  | 105.6 | 9.36  | 274 | 5  |
| Q06124     | Tyrosine-p   | i20.7705193  | 9  | 9  | 9  | 68.4  | 7.3   | 131 | 9  |
| Q6P2E9     | Enhancer o   | f7.49464668  | 7  | 8  | 7  | 151.6 | 5.86  | 90  | 7  |

|            |                       |    |    |    |       |       |     |    |
|------------|-----------------------|----|----|----|-------|-------|-----|----|
| 014828     | Secretory c28.2420749 | 6  | 8  | 6  | 38.3  | 7.64  | 131 | 6  |
| P14384     | Carboxypept14.8984199 | 5  | 8  | 5  | 50.5  | 7.36  | 148 | 5  |
| Q8NG23     | GTP binding34.8484848 | 8  | 10 | 5  | 22.3  | 7.03  | 105 | 8  |
| V9HW90     | Epididymis 19.348659  | 6  | 7  | 6  | 56.2  | 8.5   | 94  | 6  |
| F8VRHO     | Poly(rC)-bi30.9677419 | 4  | 9  | 1  | 32    | 8.07  | 140 | 4  |
| Q9H6R4     | Nucleolar p9.07504363 | 7  | 8  | 7  | 127.5 | 7.64  | 146 | 7  |
| Q53GW1     | Vesicle tra21.4953271 | 9  | 9  | 9  | 72.3  | 6.38  | 93  | 9  |
| 095817     | BAG family 22.2608696 | 9  | 10 | 9  | 61.6  | 6.95  | 117 | 9  |
| 075607     | Nucleoplas 45.505618  | 5  | 7  | 5  | 19.3  | 4.63  | 232 | 5  |
| Q13867     | Bleomycin 128.5714286 | 9  | 13 | 9  | 52.5  | 6.27  | 120 | 9  |
| Q86UE4     | Protein LYF15.8075601 | 6  | 7  | 6  | 63.8  | 9.32  | 132 | 6  |
| Q5QJE6     | Deoxynuclec16.6666667 | 8  | 9  | 8  | 84.4  | 6.16  | 160 | 8  |
| Q9BZK7     | F-box-like/17.3151751 | 6  | 7  | 4  | 55.6  | 5.55  | 175 | 6  |
| Q7L0Y3     | Mitochondri18.8585608 | 7  | 9  | 7  | 47.3  | 9.36  | 137 | 7  |
| P21266     | Glutathione39.5555556 | 8  | 10 | 8  | 26.5  | 5.54  | 172 | 8  |
| Q15021     | Condensin c8.06566738 | 9  | 9  | 9  | 157.1 | 6.61  | 143 | 9  |
| PODN79     | Cystathionil6.1524501 | 8  | 9  | 8  | 60.5  | 6.65  | 98  | 8  |
| 075822     | Eukaryotic 16.6666667 | 5  | 7  | 5  | 29    | 4.83  | 201 | 5  |
| Q9BXS5     | AP-1 comple17.7304965 | 6  | 10 | 6  | 48.6  | 7.3   | 168 | 6  |
| P50213     | Isocitrate 30.6010929 | 10 | 11 | 10 | 39.6  | 6.92  | 111 | 10 |
| Q14558     | Phosphoric30.0561798  | 7  | 9  | 5  | 39.4  | 7.2   | 129 | 7  |
| Q02880     | DNA topois6.45756458  | 9  | 11 | 4  | 183.2 | 8     | 147 | 9  |
| Q13895     | Bystin OS=124.9427918 | 8  | 9  | 8  | 49.6  | 8.12  | 155 | 8  |
| Q9NWH9     | SAFB-like 16.76982592 | 7  | 9  | 7  | 117.1 | 7.87  | 129 | 7  |
| Q8TDD1     | ATP-dependc14.7559591 | 10 | 10 | 10 | 98.5  | 10.02 | 130 | 10 |
| C9JRZ6     | MICOS compl23.7068966 | 6  | 7  | 6  | 26.7  | 8.47  | 176 | 6  |
| Q13242     | Serine/argi32.1266968 | 8  | 14 | 7  | 25.5  | 8.65  | 184 | 8  |
| 060678     | Protein arg17.1374765 | 8  | 10 | 8  | 59.8  | 5.35  | 182 | 8  |
| P53582     | Methionine 30.3108808 | 6  | 7  | 6  | 43.2  | 7.17  | 103 | 6  |
| Q9COC9     | (E3-indeper7.58513932 | 7  | 7  | 7  | 141.2 | 5.12  | 177 | 7  |
| P52294     | Importin su16.1710037 | 9  | 10 | 2  | 60.2  | 5.01  | 183 | 9  |
| Q8N1G4     | Leucine-ric 19.897084 | 10 | 12 | 10 | 63.4  | 8.28  | 59  | 10 |
| Q53GS9     | U4/U6.U5 tr 23.539823 | 10 | 11 | 9  | 65.3  | 8.91  | 86  | 10 |
| Q9Y316     | Protein MEA26.9360269 | 5  | 7  | 5  | 33.7  | 7.14  | 113 | 5  |
| P30085     | UMP-CMP kir44.3877551 | 6  | 9  | 6  | 22.2  | 5.57  | 175 | 6  |
| AOA024R8P8 | Ribosomal p52.8571429 | 4  | 16 | 4  | 8.2   | 10.1  | 207 | 4  |
| P61224     | Ras-relatec34.2391304 | 6  | 10 | 1  | 20.8  | 5.78  | 263 | 6  |
| Q9BRK5     | 45 kDa calc19.6132597 | 5  | 6  | 5  | 41.8  | 4.86  | 199 | 5  |
| MOQYS1     | 60S riboson38.0952381 | 10 | 16 | 10 | 24.2  | 10.86 | 206 | 10 |
| Q96GQ7     | Probable A115.5778894 | 11 | 11 | 11 | 89.8  | 9.28  | 91  | 11 |
| E5RJD8     | Tubulin-spe42.8571429 | 4  | 9  | 4  | 14.3  | 5.12  | 179 | 4  |
| Q9P2B2     | Prostaglanc 14.334471 | 9  | 9  | 2  | 98.5  | 6.61  | 69  | 9  |
| 075947     | ATP syntha:68.3229814 | 9  | 12 | 9  | 18.5  | 5.3   | 126 | 9  |
| Q86UA3     | Chromosome 21.8085106 | 7  | 8  | 7  | 42.5  | 6.84  | 189 | 7  |
| Q03252     | Lamin-B2 O519.1935484 | 10 | 10 | 9  | 69.9  | 5.59  | 124 | 10 |
| AOA024R094 | Poly(A) bir25.4901961 | 5  | 6  | 5  | 35    | 4.79  | 130 | 5  |
| V9HWI3     | Cathepsin I24.7572816 | 8  | 10 | 8  | 44.5  | 6.54  | 138 | 8  |
| B3KXW5     | cDNA FLJ461 10.887574 | 7  | 9  | 7  | 94.1  | 7.05  | 120 | 7  |
| Q5HYG7     | Putative ur21.5859031 | 7  | 8  | 7  | 50.3  | 7.8   | 131 | 7  |
| Q9Y3U8     | 60S riboson33.3333333 | 6  | 11 | 6  | 12.2  | 11.59 | 208 | 6  |
| P50416     | Carnitine (15.2652005 | 10 | 10 | 10 | 88.3  | 8.65  | 168 | 10 |
| AOA023T6R1 | Mago nashi 44.5945946 | 6  | 9  | 1  | 17.3  | 6.39  | 107 | 6  |
| Q9P035     | Very-long-c22.9281768 | 7  | 9  | 7  | 43.1  | 8.94  | 150 | 7  |
| Q9NV17     | ATPase fami17.5078864 | 9  | 10 | 4  | 71.3  | 8.98  | 192 | 9  |
| B2R7B5     | cDNA, FLJ9:18.9616253 | 9  | 12 | 9  | 48.2  | 8.66  | 160 | 9  |
| P10155     | 60 kDa SS-/21.5613383 | 9  | 10 | 9  | 60.6  | 8.03  | 161 | 9  |
| P31937     | 3-hydroxyi:20.5357143 | 4  | 5  | 4  | 35.3  | 8.13  | 149 | 4  |
| 043813     | LanC-like p26.8170426 | 6  | 7  | 6  | 45.3  | 7.75  | 122 | 6  |
| AOA140VJK2 | Glycerol-3-16.0935351 | 9  | 9  | 9  | 80.8  | 7.53  | 126 | 9  |
| Q5SSJ5     | Heterochron15.1898734 | 8  | 9  | 8  | 61.2  | 9.67  | 150 | 8  |
| Q9HAV0     | Guanine nuc20.5882353 | 6  | 8  | 1  | 37.5  | 6     | 155 | 6  |
| B7Z4C8     | 60S riboson43.8461538 | 9  | 12 | 9  | 15.1  | 10.37 | 154 | 9  |
| Q8IVT2     | Mitotic int16.2002946 | 7  | 10 | 7  | 75.3  | 6.83  | 115 | 7  |
| Q92734     | Protein TF 23.5       | 6  | 7  | 6  | 43.4  | 5.1   | 80  | 6  |
| C9JIF9     | Acylamino-c16.0108548 | 8  | 8  | 8  | 81.6  | 5.54  | 161 | 8  |
| 094826     | Mitochondri19.9013158 | 10 | 10 | 10 | 67.4  | 7.12  | 131 | 10 |
| Q9NZI8     | Insulin-li15.5979203  | 7  | 9  | 6  | 63.4  | 9.2   | 194 | 7  |
| Q96C19     | EF-hand don37.9166667 | 8  | 9  | 8  | 26.7  | 5.2   | 197 | 8  |
| Q549C5     | HCG2010808,48.5915493 | 4  | 8  | 4  | 15.5  | 4.34  | 174 | 4  |
| B4DR61     | Protein tra19.5020747 | 8  | 13 | 8  | 52.9  | 8.24  | 153 | 8  |
| Q6IAX2     | RPL21 prote 43.125    | 7  | 13 | 7  | 18.6  | 10.49 | 167 | 7  |
| Q96HC4     | PDZ and LIM18.1208054 | 8  | 9  | 8  | 63.9  | 8.21  | 82  | 8  |
| P63096     | Guanine nuc28.2485876 | 8  | 10 | 3  | 40.3  | 5.97  | 170 | 8  |

|            |                   |              |    |    |    |       |       |     |    |
|------------|-------------------|--------------|----|----|----|-------|-------|-----|----|
| P51398     | 28S ribosom       | 15.5778894   | 4  | 6  | 4  | 45.5  | 8.88  | 103 | 4  |
| O75964     | ATP synthas       | 47.5728155   | 5  | 9  | 5  | 11.4  | 9.64  | 290 | 5  |
| P15328     | Folate rec        | 36.5758755   | 6  | 7  | 6  | 29.8  | 7.97  | 128 | 6  |
| Q9UKX7     | Nuclear poi       | 27.3504274   | 8  | 10 | 8  | 50.1  | 7.06  | 116 | 8  |
| Q3LXA3     | Triokinase/       | 18.4347826   | 5  | 5  | 5  | 58.9  | 7.49  | 138 | 5  |
| P61956     | Small ubiq        | 33.6842105   | 4  | 9  | 4  | 10.9  | 5.5   | 173 | 4  |
| J3KQJ1     | Sulfatase- $\eta$ | 26.5625      | 6  | 7  | 6  | 35.9  | 9.19  | 171 | 6  |
| O96008     | Mitochondri       | 27.1468144   | 7  | 11 | 7  | 37.9  | 7.25  | 143 | 7  |
| P62318     | Small nucle       | 29.3650794   | 3  | 6  | 3  | 13.9  | 10.32 | 99  | 3  |
| Q01085     | Nucleolysir       | 15.4666667   | 4  | 6  | 4  | 41.6  | 7.74  | 133 | 4  |
| Q8NF37     | Lysophosph        | 13.670412    | 6  | 7  | 6  | 59.1  | 6.02  | 161 | 6  |
| Q4QQP8     | PTGFRN prot       | 15.4822335   | 8  | 8  | 1  | 88.2  | 6.65  | 112 | 8  |
| Q92922     | SWI/SNF con       | 7.51131222   | 6  | 7  | 5  | 122.8 | 5.76  | 71  | 6  |
| Q15056     | Eukaryotic        | 35.483871    | 7  | 12 | 7  | 27.4  | 7.23  | 94  | 7  |
| P40938     | Replicatio        | 28.0898876   | 7  | 7  | 7  | 40.5  | 8.34  | 134 | 7  |
| AOA0C4DG89 | Probable A1       | 9.68992248   | 9  | 9  | 9  | 117.4 | 9.29  | 161 | 9  |
| Q92917     | G patch don       | 17.6470588   | 5  | 6  | 5  | 52.2  | 6.15  | 138 | 5  |
| Q9UBK8     | Methionine        | 13.9310345   | 7  | 7  | 7  | 80.4  | 6.49  | 193 | 7  |
| A8K607     | cDNA FLJ76        | 6.80772769   | 5  | 6  | 5  | 123.8 | 6.34  | 142 | 5  |
| O75131     | Copine-3 O        | 18.6219739   | 9  | 10 | 9  | 60.1  | 5.85  | 178 | 9  |
| Q9UJU6     | Drebrin-li        | 20.9302326   | 6  | 6  | 6  | 48.2  | 5.05  | 185 | 6  |
| F8VXU5     | Vacuolar p        | 36.9158879   | 6  | 8  | 6  | 24    | 8.18  | 140 | 6  |
| O43252     | Bifunction        | 14.5833333   | 6  | 7  | 5  | 70.8  | 6.86  | 94  | 6  |
| O43237     | Cytoplasmic       | 22.7642276   | 8  | 11 | 7  | 54.1  | 6.38  | 161 | 8  |
| O15347     | High mobili       | 20           | 5  | 8  | 5  | 23    | 8.37  | 103 | 5  |
| Q53F37     | SAR1a gene        | 33.8383838   | 7  | 9  | 4  | 22.4  | 6.11  | 108 | 7  |
| Q68D08     | Putative ur       | 19.7530864   | 4  | 5  | 4  | 36.7  | 6.06  | 197 | 4  |
| Q9NRF9     | DNA polymer       | 53.0612245   | 6  | 9  | 6  | 16.8  | 4.74  | 248 | 6  |
| Q5VZU9     | Tripeptidy        | 19.74643423  | 9  | 9  | 9  | 139.7 | 6.52  | 103 | 9  |
| O95861     | 3' (2'), 5'       | -l30.1948052 | 7  | 7  | 7  | 33.4  | 5.69  | 146 | 7  |
| Q9GZZ9     | Ubiquitin-l       | 22.029703    | 6  | 8  | 6  | 44.8  | 4.84  | 96  | 6  |
| Q9GZZ1     | N-alpha-acc       | 47.3372781   | 7  | 9  | 7  | 19.4  | 8.81  | 153 | 7  |
| Q59GR1     | Niemann-Pi        | 9.61986036   | 10 | 11 | 10 | 143.1 | 5.45  | 98  | 10 |
| P57088     | Transmembr        | 29.5546559   | 7  | 9  | 7  | 28    | 9.7   | 118 | 7  |
| Q9BYG3     | MKI67 FHA         | c35.4948805  | 6  | 8  | 6  | 34.2  | 9.88  | 78  | 6  |
| Q5R3I4     | Tetratricol       | 17.6972281   | 6  | 8  | 6  | 52.8  | 5.99  | 148 | 6  |
| Q00653     | Nuclear fac       | 13.5555556   | 8  | 9  | 8  | 96.7  | 6.25  | 93  | 8  |
| AOA0S2Z569 | DAZ associ        | 20.6388206   | 5  | 7  | 5  | 43.4  | 8.56  | 215 | 5  |
| Q15631     | Translin O        | 26.3157895   | 4  | 5  | 4  | 26.2  | 6.44  | 176 | 4  |
| AOA087WZN1 | Isocitrate        | 19.8966408   | 6  | 8  | 6  | 42.4  | 8.46  | 192 | 6  |
| AOA0A6YY92 | Adenylosuc        | 25.9036145   | 10 | 10 | 10 | 56.2  | 7.43  | 156 | 10 |
| Q5M7Z5     | GRHPR prote       | 22.28739     | 5  | 7  | 5  | 36.8  | 6.35  | 109 | 5  |
| Q92769     | Histone de        | 25.6147541   | 9  | 10 | 5  | 55.3  | 5.91  | 109 | 9  |
| B2R4R9     | HCG26477          | O544.9275362 | 5  | 10 | 5  | 7.8   | 10.7  | 165 | 5  |
| AOA0A0MTJ9 | Neutral chc       | 18.3035714   | 5  | 10 | 5  | 49.9  | 7.21  | 116 | 5  |
| O75521     | Enoyl-CoA         | c17.2588832  | 6  | 7  | 6  | 43.6  | 9     | 146 | 6  |
| Q9GZL7     | Ribosome b        | 23.6406619   | 7  | 8  | 7  | 47.7  | 5.9   | 74  | 7  |
| Q01130     | Serine/arg        | 21.719457    | 4  | 8  | 4  | 25.5  | 11.85 | 297 | 4  |
| Q8WYP5     | Protein EL        | 5.33980583   | 9  | 9  | 9  | 252.3 | 6.6   | 112 | 9  |
| Q15182     | Small nucle       | 23.1578947   | 7  | 10 | 7  | 29.7  | 10.07 | 196 | 7  |
| P11279     | Lysosome-a        | 7.67386091   | 3  | 5  | 3  | 44.9  | 8.75  | 190 | 3  |
| Q8TC12     | Retinol de        | 23.5849057   | 6  | 7  | 6  | 35.4  | 8.82  | 214 | 6  |
| Q969S3     | Zinc finger       | 16.9811321   | 6  | 7  | 6  | 54.2  | 6.15  | 123 | 6  |
| Q15637     | Splicing f        | 15.9624413   | 8  | 12 | 8  | 68.3  | 8.98  | 154 | 8  |
| Q969V3     | Nicalin OS        | =12.9662522  | 5  | 6  | 5  | 62.9  | 6.89  | 127 | 5  |
| P51648     | Fatty alde        | 15.257732    | 6  | 8  | 6  | 54.8  | 7.88  | 152 | 6  |
| Q9NQ29     | Putative R        | 21.2938005   | 7  | 10 | 3  | 43.7  | 9.92  | 92  | 7  |
| Q13011     | Delta(3,5)-       | 20.7317073   | 6  | 7  | 6  | 35.8  | 8     | 195 | 6  |
| B4DU42     | cDNA FLJ56        | 113.0841121  | 6  | 7  | 6  | 71.8  | 7.3   | 83  | 6  |
| Q96G03     | Phosphogluc       | 18.4640523   | 7  | 9  | 7  | 68.2  | 6.73  | 123 | 7  |
| Q15738     | Sterol-4-a        | l21.4477212  | 5  | 6  | 5  | 41.9  | 8.06  | 154 | 5  |
| Q86XP3     | ATP-depend        | 12.793177    | 8  | 8  | 8  | 102.9 | 7.02  | 77  | 8  |
| B3KML1     | cDNA FLJ11        | :14.2581888  | 6  | 7  | 5  | 58.4  | 5.06  | 134 | 6  |
| Q9UI30     | Multifuncti       | 42.4         | 4  | 5  | 4  | 14.2  | 5.26  | 195 | 4  |
| P00403     | Cytochrome        | 23.3480176   | 4  | 7  | 4  | 25.5  | 4.82  | 107 | 4  |
| Q13641     | Trophoblast       | 18.0952381   | 6  | 8  | 6  | 46    | 6.83  | 237 | 6  |
| A6NFX8     | ADP-sugar         | p32.3275862  | 7  | 10 | 7  | 25.9  | 5.19  | 102 | 7  |
| O43290     | U4/U6.U5          | tr10.25      | 6  | 7  | 6  | 90.2  | 6.13  | 157 | 6  |
| P54709     | Sodium/pot        | :37.2759857  | 7  | 10 | 7  | 31.5  | 8.35  | 98  | 7  |
| O75116     | Rho-associ        | 6.62824207   | 7  | 7  | 7  | 160.8 | 6.02  | 200 | 7  |
| Q9H2U1     | ATP-depend        | 10.3174603   | 6  | 7  | 6  | 114.7 | 7.68  | 104 | 6  |
| J3KQ48     | Peptidyl-t        | f42.7777778  | 4  | 5  | 4  | 19.3  | 8.73  | 153 | 4  |
| P42771     | Cyclin-dep        | 43.5897436   | 5  | 5  | 2  | 16.5  | 5.81  | 164 | 5  |

|            |             |              |    |    |    |       |       |     |    |
|------------|-------------|--------------|----|----|----|-------|-------|-----|----|
| 000487     | 26S proteas | 29.6774194   | 6  | 7  | 6  | 34.6  | 6.52  | 138 | 6  |
| P08240     | Signal rec  | 11.1285266   | 5  | 6  | 5  | 69.8  | 8.95  | 195 | 5  |
| B2R9H3     | cDNA, FLJ9  | 20.855615    | 6  | 7  | 4  | 42.7  | 5.47  | 130 | 6  |
| Q6YN16     | Hydroxyste  | 27.7511962   | 7  | 7  | 7  | 45.4  | 7.99  | 138 | 7  |
| Q14694     | Ubiquitin c | 11.0275689   | 6  | 7  | 6  | 87.1  | 5.31  | 99  | 6  |
| P62851     | 40S riboso  | 32           | 7  | 16 | 7  | 13.7  | 10.11 | 298 | 7  |
| P26447     | Protein S1  | 48.5148515   | 7  | 17 | 7  | 11.7  | 6.11  | 254 | 7  |
| Q13564     | NEDD8-acti  | 12.5468165   | 5  | 7  | 5  | 60.2  | 5.4   | 152 | 5  |
| A8K8B0     | cDNA FLJ7   | 610.7946027  | 5  | 6  | 2  | 73.5  | 5.1   | 141 | 5  |
| Q76LA1     | CSTB protei | 45.9183673   | 3  | 8  | 3  | 11.1  | 7.56  | 101 | 3  |
| Q99567     | Nuclear poi | 12.145749    | 6  | 6  | 6  | 83.5  | 5.69  | 178 | 6  |
| B2R704     | cDNA, FLJ9  | 13.2176235   | 9  | 9  | 7  | 83.9  | 9.54  | 150 | 9  |
| Q14320     | Protein FA  | 19.7640118   | 5  | 6  | 5  | 40.2  | 6.83  | 164 | 5  |
| 000273     | DNA fragme  | 21.4501511   | 6  | 8  | 6  | 36.5  | 4.79  | 112 | 6  |
| Q9NQT4     | Exosome con | 24.2553191   | 4  | 6  | 4  | 25.2  | 7.59  | 131 | 4  |
| Q53H82     | Endoribonuc | 30.9027778   | 6  | 7  | 6  | 32.8  | 6.8   | 88  | 6  |
| Q96AY3     | Peptidyl-p  | 17.5257732   | 8  | 10 | 8  | 64.2  | 5.62  | 182 | 8  |
| AOA024R8E4 | Chromosome  | 34.0807175   | 6  | 8  | 6  | 25.4  | 5.52  | 253 | 6  |
| Q04837     | Single-str  | 59.4594595   | 8  | 8  | 8  | 17.2  | 9.6   | 109 | 8  |
| A8K5M4     | cDNA FLJ7   | 516.9847328  | 6  | 8  | 6  | 58    | 5.85  | 142 | 6  |
| P83731     | 60S riboso  | 34.3949045   | 6  | 10 | 6  | 17.8  | 11.25 | 221 | 6  |
| P45973     | Chromobox   | 136.1256545  | 5  | 6  | 5  | 22.2  | 5.86  | 158 | 5  |
| O14773     | Tripeptidy  | 111.9005329  | 5  | 6  | 5  | 61.2  | 6.48  | 205 | 5  |
| Q6FGG2     | VAMP3 prote | 40           | 3  | 4  | 3  | 11.3  | 8.79  | 162 | 3  |
| Q9H0S4     | Probable A  | 125.0549451  | 8  | 8  | 8  | 50.6  | 9.1   | 92  | 8  |
| O94906     | Pre-mRNA-p  | 11.6896918   | 8  | 8  | 8  | 106.9 | 8.25  | 183 | 8  |
| Q9ULC4     | Malignant   | 129.8342541  | 3  | 6  | 3  | 20.5  | 8.82  | 186 | 3  |
| P35658     | Nuclear poi | 5.215311     | 8  | 10 | 8  | 213.5 | 7.47  | 146 | 8  |
| B2R7E8     | cDNA, FLJ9  | 22.962963    | 6  | 7  | 6  | 29.2  | 6.15  | 93  | 6  |
| AOA087WWF6 | DNA polyme  | 18.2539683   | 6  | 6  | 6  | 54.7  | 5.95  | 102 | 6  |
| Q562Z4     | Actin-like  | 52.4271845   | 3  | 22 | 1  | 11.5  | 7.58  | 247 | 3  |
| Q9H3N1     | Thioredoxin | 21.0714286   | 6  | 10 | 6  | 31.8  | 4.98  | 185 | 6  |
| P19784     | Casein kin  | 24.8571429   | 6  | 7  | 5  | 41.2  | 8.56  | 65  | 6  |
| Q9BRR6     | ADP-depend  | 20.5231388   | 6  | 6  | 6  | 54.1  | 6.2   | 131 | 6  |
| P27105     | Erythrocyt  | 23.6111111   | 6  | 8  | 6  | 31.7  | 7.88  | 185 | 6  |
| Q8IVF2     | Protein AHP | 8.35202761   | 6  | 8  | 6  | 616.2 | 5.36  | 181 | 6  |
| 000267     | Transcript  | 17.63569457  | 6  | 7  | 6  | 120.9 | 5.06  | 89  | 6  |
| Q9BRP8     | Partner of  | 35.7843137   | 5  | 6  | 5  | 22.6  | 9.45  | 119 | 5  |
| Q9UBB4     | Ataxin-10   | (21.8947368  | 7  | 7  | 7  | 53.5  | 5.25  | 161 | 7  |
| Q7Z7K6     | Centromere  | 21.4545455   | 4  | 7  | 4  | 29.9  | 9.73  | 189 | 4  |
| P30622     | CAP-Gly don | 5.07649513   | 7  | 8  | 7  | 162.1 | 5.36  | 119 | 7  |
| E9PR17     | CD59 glyco  | 25.3846154   | 4  | 12 | 4  | 14.5  | 7.77  | 199 | 4  |
| Q9UBF2     | Coatome     | st7.23306544 | 4  | 5  | 3  | 97.6  | 5.81  | 110 | 4  |
| Q96T37     | Putative R  | 9.31422723   | 5  | 6  | 5  | 107.1 | 10.08 | 65  | 5  |
| B4DPD5     | Ubiquitin   | 125          | 6  | 6  | 6  | 35.2  | 5.59  | 126 | 6  |
| AOA024RDE5 | Ras-GTPase  | 18.2572614   | 7  | 9  | 6  | 54.1  | 5.55  | 102 | 7  |
| Q01844     | RNA-bindin  | 9.60365854   | 4  | 6  | 4  | 68.4  | 9.33  | 102 | 4  |
| A8K7Z3     | cDNA FLJ7   | 12.0095125   | 6  | 6  | 6  | 95.9  | 5.07  | 110 | 6  |
| P15559     | NAD(P)H del | 25.9124088   | 5  | 10 | 5  | 30.8  | 8.88  | 136 | 5  |
| P62913     | 60S riboso  | 57.3033708   | 8  | 12 | 8  | 20.2  | 9.6   | 286 | 8  |
| Q15437     | Protein tr  | 8.34419817   | 5  | 7  | 3  | 86.4  | 6.89  | 187 | 5  |
| Q9H2U2     | Inorganic   | 129.9401198  | 7  | 8  | 6  | 37.9  | 7.39  | 150 | 7  |
| Q96AC1     | Fermitin f  | 15.5882353   | 8  | 9  | 8  | 77.8  | 6.7   | 111 | 8  |
| Q9BUP3     | Oxidoreduct | 37.1900826   | 9  | 9  | 9  | 27    | 8.38  | 92  | 9  |
| Q32P28     | Prolyl 3-h  | 12.2282609   | 8  | 8  | 8  | 83.3  | 5.14  | 149 | 8  |
| Q9BUQ8     | Probable A  | 111.3414634  | 7  | 8  | 7  | 95.5  | 9.55  | 97  | 7  |
| Q9NZ01     | Very-long   | 12.987013    | 5  | 6  | 5  | 36    | 9.45  | 110 | 5  |
| J3KN36     | Nodal modul | 8.36621942   | 8  | 8  | 8  | 139.3 | 5.67  | 98  | 8  |
| P51114     | Fragile X   | 114.6537842  | 6  | 7  | 5  | 69.7  | 6.15  | 126 | 6  |
| Q9H444     | Charged mu  | 129.9107143  | 6  | 8  | 6  | 24.9  | 4.82  | 212 | 6  |
| Q9HDC9     | Adipocyte   | 128.3653846  | 7  | 11 | 7  | 46.5  | 6.16  | 42  | 7  |
| Q6IPH7     | RPL14 prote | 24.0909091   | 5  | 12 | 1  | 23.8  | 10.93 | 266 | 5  |
| AOA0AOMTC1 | E3 ubiquiti | 2.85388128   | 10 | 12 | 10 | 596.1 | 6.42  | 68  | 10 |
| Q9UBQ5     | Eukaryotic  | 29.8165138   | 5  | 6  | 5  | 25    | 4.93  | 84  | 5  |
| P11216     | Glycogen pl | 10.7947805   | 7  | 7  | 3  | 96.6  | 6.86  | 108 | 7  |
| P07858     | Cathepsin   | 116.8141593  | 5  | 7  | 5  | 37.8  | 6.3   | 133 | 5  |
| O75436     | Vacuolar pi | 25.382263    | 7  | 7  | 7  | 38.1  | 6.57  | 136 | 7  |
| Q14696     | LDLR chape  | 22.6495726   | 4  | 6  | 4  | 26.1  | 7.78  | 66  | 4  |
| P07919     | Cytochrome  | 29.6703297   | 2  | 4  | 2  | 10.7  | 4.44  | 137 | 2  |
| O75489     | NADH dehyd  | 27.2727273   | 5  | 7  | 5  | 30.2  | 7.5   | 160 | 5  |
| P78406     | mRNA expor  | 120.1086957  | 6  | 7  | 6  | 40.9  | 7.83  | 165 | 6  |
| Q15061     | WD repeat   | 18.4638109   | 8  | 8  | 8  | 74.8  | 5.57  | 69  | 8  |
| P36957     | Dihydrolip  | 14.1280353   | 7  | 10 | 7  | 48.7  | 8.95  | 204 | 7  |

|            |                                                    |   |    |   |       |       |     |   |
|------------|----------------------------------------------------|---|----|---|-------|-------|-----|---|
| B2R6U8     | cDNA, FLJ931.7180617                               | 5 | 8  | 5 | 26.2  | 8.82  | 176 | 5 |
| A0A1POAYU5 | Sideroflexin26.1538462                             | 5 | 5  | 4 | 36    | 9.09  | 105 | 5 |
| A0A140VJX3 | Sulfurtransferase28.956229                         | 5 | 7  | 5 | 33.2  | 6.6   | 103 | 5 |
| Q9Y3C6     | Peptidyl-peptidase27.1084337                       | 3 | 5  | 3 | 18.2  | 7.99  | 148 | 3 |
| Q12907     | Vesicular trafficking protein6.5730337             | 6 | 8  | 6 | 40.2  | 6.95  | 112 | 6 |
| P61081     | NEDD8-conjugase37.704918                           | 8 | 9  | 8 | 20.9  | 7.69  | 91  | 8 |
| A0A024R8R4 | Nuclear pore complex protein15.9539474             | 8 | 8  | 8 | 68.1  | 6.38  | 79  | 8 |
| Q13442     | 28 kDa heat shock protein27.0718232                | 5 | 7  | 5 | 20.6  | 8.87  | 213 | 5 |
| O43818     | U3 small nuclear RNA16.2105263                     | 7 | 9  | 7 | 51.8  | 7.85  | 137 | 7 |
| Q53R19     | Arp2/3 complex29                                   | 8 | 9  | 8 | 34.3  | 7.36  | 55  | 8 |
| Q15758     | Neutral amino acid oxidase10.9057301               | 4 | 7  | 4 | 56.6  | 5.48  | 135 | 4 |
| Q16698     | 2,4-dienoyl-CoA synthetase22.0895522               | 5 | 5  | 5 | 36    | 9.28  | 199 | 5 |
| P13073     | Cytochrome b5.0532544                              | 7 | 11 | 7 | 19.6  | 9.51  | 141 | 7 |
| P42126     | Enoyl-CoA hydratase23.1788079                      | 6 | 7  | 6 | 32.8  | 8.54  | 152 | 6 |
| Q86X55     | Histone arginase12.3355263                         | 5 | 6  | 5 | 65.8  | 6.73  | 80  | 5 |
| B2R761     | cDNA, FLJ931.4424132                               | 8 | 10 | 8 | 59    | 7.05  | 74  | 8 |
| P52815     | 39S ribosomal protein41.4141414                    | 5 | 8  | 5 | 21.3  | 8.87  | 140 | 5 |
| A8K3Q9     | cDNA FLJ76625.462963                               | 5 | 11 | 1 | 23.4  | 10.93 | 246 | 5 |
| Q92882     | Osteoclast-stimulating factor31.7757009            | 5 | 6  | 5 | 23.8  | 5.68  | 142 | 5 |
| P11498     | Pyruvate carboxylase7.38539898                     | 7 | 7  | 7 | 129.6 | 6.84  | 123 | 7 |
| Q9HCE1     | Putative hexamer27.218345                          | 7 | 7  | 7 | 113.6 | 8.82  | 111 | 7 |
| Q9BPX3     | Condensin complex7.29064039                        | 6 | 7  | 6 | 114.3 | 5.59  | 156 | 6 |
| Q6PJJ2     | RRP1 protein16.0944206                             | 7 | 8  | 7 | 53.4  | 9.48  | 145 | 7 |
| P23193     | Transcriptin27.2425249                             | 7 | 7  | 7 | 33.9  | 8.38  | 129 | 7 |
| A0A140VKE9 | Testis tissue11.5987461                            | 5 | 7  | 5 | 71.4  | 5.2   | 115 | 5 |
| H3BRT0     | Sulfotransferase82                                 | 3 | 5  | 1 | 5.4   | 5.87  | 77  | 3 |
| Q59EL2     | COP9 complex15.2993348                             | 5 | 6  | 5 | 52.5  | 5.54  | 100 | 5 |
| A0A024RC37 | Uncharacterized protein25.3205128                  | 6 | 7  | 4 | 35.7  | 7.55  | 57  | 6 |
| Q9Y5J1     | U3 small nuclear RNA17.8057554                     | 6 | 7  | 6 | 62    | 8.76  | 137 | 6 |
| A0A0AOMSE2 | Hydroxyacyl-CoA lyase13.8461538                    | 5 | 8  | 5 | 42.1  | 9.26  | 198 | 5 |
| P35221     | Catenin alpha9.05077263                            | 5 | 5  | 5 | 100   | 6.29  | 110 | 5 |
| Q9NVP1     | ATP-dependent protein6.7462687                     | 6 | 6  | 6 | 75.4  | 9.5   | 119 | 6 |
| A0A0AOMSV9 | Tapasin OS11.7063492                               | 4 | 6  | 4 | 53.9  | 7.08  | 111 | 4 |
| P32320     | Cytidine deaminase48.630137                        | 4 | 4  | 4 | 16.2  | 6.92  | 118 | 4 |
| Q9UL25     | Ras-related protein24                              | 4 | 4  | 4 | 24.3  | 7.94  | 186 | 4 |
| P68431     | Histone H3.50.7352941                              | 8 | 18 | 4 | 15.4  | 11.12 | 326 | 8 |
| B2RB12     | cDNA, FLJ931.9204545                               | 4 | 4  | 4 | 39.9  | 4.53  | 162 | 4 |
| A8KAE0     | cDNA FLJ7827.52878654                              | 7 | 7  | 7 | 125.9 | 5.62  | 123 | 7 |
| P53701     | Cytochrome b27.9850746                             | 7 | 7  | 7 | 30.6  | 6.68  | 96  | 7 |
| O60271     | C-Jun-aminotransferase6.20741862                   | 5 | 6  | 5 | 146.1 | 5.15  | 102 | 5 |
| P50238     | Cysteine reductase159.7402597                      | 4 | 7  | 4 | 8.5   | 8.75  | 101 | 4 |
| Q96T67     | TOB3 OS=Homo13.8408304                             | 7 | 7  | 2 | 65.1  | 9.33  | 160 | 7 |
| A0A024RDV7 | Importin subunit19.9616123                         | 7 | 12 | 4 | 57.8  | 4.94  | 75  | 7 |
| P08574     | Cytochrome b26.1538462                             | 6 | 8  | 6 | 35.4  | 9     | 135 | 6 |
| Q96A08     | Histone H2F29.9212598                              | 4 | 17 | 1 | 14.2  | 10.32 | 290 | 4 |
| Q9UHY1     | Nuclear receptor15.1401869                         | 5 | 7  | 5 | 59.8  | 5.08  | 82  | 5 |
| P01111     | GTPase NRas44.973545                               | 6 | 7  | 6 | 21.2  | 5.17  | 171 | 6 |
| O43660     | Pleiotropic protein14.5914397                      | 5 | 6  | 5 | 57.2  | 9.17  | 130 | 5 |
| Q9Y305     | Acyl-coenzyme A oxidase18.4510251                  | 7 | 7  | 7 | 49.9  | 8.6   | 83  | 7 |
| Q9UHD9     | Ubiquitin-like protein8.33333333                   | 3 | 5  | 2 | 65.7  | 5.22  | 138 | 3 |
| P20073     | Annexin A718.2377049                               | 8 | 9  | 8 | 52.7  | 5.68  | 136 | 8 |
| Q9H3P7     | Golgi resident protein15.719697                    | 5 | 6  | 5 | 60.6  | 5.06  | 73  | 5 |
| O60739     | Eukaryotic translation initiation factor51.3274336 | 4 | 5  | 1 | 12.8  | 7.37  | 74  | 4 |
| J3KR97     | Tubulin-specific GTPase7.15447154                  | 6 | 7  | 6 | 136.5 | 6.34  | 96  | 6 |
| P20839     | Inosine 5'-phosphatase17.5097276                   | 6 | 6  | 5 | 55.4  | 6.9   | 133 | 6 |
| O75844     | CAAX prenyltransferase15.5789474                   | 7 | 10 | 7 | 54.8  | 7.49  | 48  | 7 |
| P06703     | Protein S10035.5555556                             | 7 | 11 | 7 | 10.2  | 5.48  | 194 | 7 |
| O00151     | PDZ and LIM domain protein33.4346505               | 5 | 5  | 5 | 36    | 7.02  | 154 | 5 |
| Q8WUX1     | Sodium-coupled protein10.8050847                   | 4 | 6  | 4 | 51.4  | 8.21  | 74  | 4 |
| Q9BTV4     | Transmembrane protein18.75                         | 5 | 6  | 5 | 44.8  | 8.13  | 103 | 5 |
| Q10713     | Mitochondrial protein13.1428571                    | 5 | 5  | 5 | 58.2  | 6.92  | 86  | 5 |
| Q01780     | Exosome complex10.3954802                          | 7 | 8  | 7 | 100.8 | 8.46  | 70  | 7 |
| Q96CP2     | FLYWCH family protein66.4285714                    | 6 | 8  | 6 | 14.6  | 8.46  | 70  | 6 |
| Q96E11     | Ribosome-associated protein35.1145038              | 7 | 7  | 7 | 29.3  | 9.79  | 90  | 7 |
| P61970     | Nuclear transcription factor44.8818898             | 3 | 4  | 3 | 14.5  | 5.38  | 100 | 3 |
| P82650     | 28S ribosomal protein27.7777778                    | 6 | 6  | 6 | 41.3  | 7.9   | 134 | 6 |
| Q9BWJ5     | Splicing factor46.5116279                          | 4 | 6  | 4 | 10.1  | 6.35  | 106 | 4 |
| P62854     | 40S ribosomal protein44.3478261                    | 4 | 10 | 4 | 13    | 11    | 155 | 4 |
| Q14CX7     | N-alpha-acetyltransferase8.53909465                | 6 | 6  | 6 | 112.2 | 6.64  | 102 | 6 |
| O15173     | Membrane-associated protein22.8699552              | 5 | 5  | 4 | 23.8  | 4.88  | 153 | 5 |
| B2R802     | cDNA, FLJ931.5602837                               | 6 | 6  | 4 | 31.3  | 9.86  | 101 | 6 |
| Q7L5Y1     | Mitochondrial protein16.2528217                    | 4 | 5  | 4 | 49.8  | 6.48  | 50  | 4 |
| P20339     | Ras-related protein30.6976744                      | 6 | 7  | 2 | 23.6  | 8.15  | 187 | 6 |



|            |             |             |   |    |   |       |       |     |   |
|------------|-------------|-------------|---|----|---|-------|-------|-----|---|
| Q969H8     | Myeloid-dei | 27.1676301  | 4 | 6  | 4 | 18.8  | 6.68  | 142 | 4 |
| Q6RFH5     | WD repeat-c | 18.1818182  | 5 | 5  | 5 | 42.4  | 8.32  | 140 | 5 |
| V9HW87     | Abhydrolase | 32.8571429  | 5 | 7  | 5 | 22.3  | 6.4   | 149 | 5 |
| AOA0S2Z497 | Peroxisomal | 27.090301   | 5 | 5  | 4 | 32.8  | 4.34  | 103 | 5 |
| Q9Y277     | Voltage-dep | 17.3144876  | 7 | 8  | 5 | 30.6  | 8.66  | 158 | 7 |
| B2RCZ4     | Protein kir | 8.51788756  | 3 | 4  | 3 | 67.2  | 5.9   | 148 | 3 |
| P48163     | NADP-depend | 20.979021   | 7 | 8  | 7 | 64.1  | 6.13  | 83  | 7 |
| Q9COC2     | 182 kDa tar | 6.18854829  | 7 | 7  | 7 | 181.7 | 4.86  | 166 | 7 |
| P61513     | 60S ribosom | 52.173913   | 6 | 11 | 6 | 10.3  | 10.43 | 264 | 6 |
| AOA024ROM6 | Translocase | 15.1315789  | 6 | 7  | 6 | 50.4  | 9.42  | 152 | 6 |
| O14737     | Programmed  | 37.6        | 4 | 6  | 4 | 14.3  | 6.04  | 172 | 4 |
| AOA024ROV4 | Vasodilator | 22.1052632  | 7 | 7  | 7 | 39.8  | 8.94  | 146 | 7 |
| B4DRM3     | cDNA FLJ54  | 17.5324675  | 8 | 8  | 8 | 69.7  | 5.67  | 132 | 8 |
| J3KNL6     | Protein tr  | 5.30335172  | 7 | 7  | 7 | 251.7 | 5.8   | 51  | 7 |
| Q8NI62     | Ribosomal p | 75.9493671  | 6 | 12 | 1 | 8.8   | 8     | 196 | 6 |
| A8KAQ6     | cDNA FLJ76  | 25.8536585  | 7 | 8  | 7 | 45.8  | 8.79  | 71  | 7 |
| Q96Q11     | CCA tRNA nt | 18.202765   | 6 | 8  | 6 | 50.1  | 8.1   | 72  | 6 |
| O00743     | Serine/thre | 16.7213115  | 4 | 5  | 4 | 35.1  | 5.69  | 129 | 4 |
| E7ESZ7     | NADH dehydr | 17.6923077  | 5 | 6  | 5 | 44.7  | 8.34  | 122 | 5 |
| Q96HY6     | DDRKG domai | 16.2420382  | 3 | 5  | 3 | 35.6  | 5.12  | 170 | 3 |
| Q9GZS3     | WD repeat-c | 23.2786885  | 4 | 6  | 4 | 33.6  | 5.47  | 97  | 4 |
| Q9H7Z7     | Prostaglan  | 21.7506631  | 4 | 4  | 4 | 41.9  | 9.16  | 135 | 4 |
| Q05DF2     | SF3A2 prot  | 14.3451143  | 5 | 6  | 5 | 51.4  | 10.11 | 120 | 5 |
| Q10570     | Cleavage ar | 5.89050589  | 6 | 7  | 6 | 160.8 | 6.4   | 165 | 6 |
| O94905     | Erlin-2 OS  | 23.3038348  | 6 | 6  | 3 | 37.8  | 5.62  | 115 | 6 |
| O75306     | NADH dehydr | 15.5507559  | 6 | 7  | 6 | 52.5  | 7.55  | 86  | 6 |
| X5CMJ9     | Proteasome  | 15.942029   | 4 | 5  | 4 | 30.3  | 7.43  | 145 | 4 |
| Q02978     | Mitochondri | 19.7452229  | 5 | 6  | 5 | 34    | 9.91  | 255 | 5 |
| Q969X6     | U3 small nt | 16.180758   | 8 | 8  | 8 | 76.8  | 8.85  | 110 | 8 |
| AOA0AOMRR7 | U1 small nt | 22.7777778  | 3 | 4  | 3 | 19.7  | 9.58  | 157 | 3 |
| G3VOE4     | Mitochondri | 19.1836735  | 7 | 7  | 7 | 54.2  | 6.83  | 67  | 7 |
| O95372     | Acyl-protei | 19.047619   | 2 | 4  | 2 | 24.7  | 7.23  | 58  | 2 |
| AOA024R7M0 | Transmembr  | 25.9574468  | 6 | 6  | 6 | 27.3  | 8.02  | 106 | 6 |
| Q05048     | Cleavage st | 18.7935035  | 5 | 6  | 5 | 48.3  | 6.58  | 44  | 5 |
| AOA087WZK0 | Deoxyhypusi | 13.5135135  | 3 | 4  | 3 | 41.1  | 5.47  | 101 | 3 |
| P62942     | Peptidyl-p  | 41.6666667  | 3 | 6  | 3 | 11.9  | 8.16  | 179 | 3 |
| B4DWA0     | cDNA FLJ54  | 17.62195122 | 2 | 11 | 2 | 34.3  | 10.37 | 106 | 2 |
| Q13620     | Cullin-4B   | (8.54326396 | 7 | 8  | 1 | 103.9 | 7.37  | 106 | 7 |
| P82933     | 28S ribosom | 16.6666667  | 6 | 6  | 6 | 45.8  | 9.51  | 182 | 6 |
| Q86Y56     | Dynein asse | 6.9005848   | 5 | 6  | 5 | 93.5  | 6.42  | 104 | 5 |
| Q9Y6K5     | 2'-5'-olig  | 9.75160994  | 8 | 8  | 8 | 121.1 | 8.4   | 64  | 8 |
| G3V5T9     | Cyclin-depe | 25.433526   | 7 | 7  | 5 | 39.2  | 8.62  | 187 | 7 |
| Q9NQG5     | Regulation  | 22.6993865  | 5 | 6  | 3 | 36.9  | 5.97  | 60  | 5 |
| Q6UN15     | Pre-mRNA 3' | 14.8148148  | 5 | 5  | 5 | 66.5  | 5.59  | 54  | 5 |
| Q7L2E3     | Putative A1 | 9.12897822  | 9 | 9  | 9 | 133.9 | 8.78  | 89  | 9 |
| AOA0G2JPP5 | Protein sci | 5.0755287   | 6 | 6  | 4 | 177.6 | 5.1   | 117 | 6 |
| Q9H9B4     | Sideroflexi | 25.1552795  | 6 | 7  | 5 | 35.6  | 9.07  | 131 | 6 |
| Q6IB54     | ATP synthas | 44.4444444  | 3 | 4  | 3 | 12.6  | 9.52  | 163 | 3 |
| AOA024QZF1 | HCG19665, i | 10.5363985  | 3 | 4  | 3 | 53.2  | 5.31  | 79  | 3 |
| P07305     | Histone H1. | 23.7113402  | 5 | 7  | 5 | 20.9  | 10.84 | 189 | 5 |
| A8K8B2     | cDNA FLJ78  | 113.2824427 | 8 | 9  | 7 | 74.2  | 6.1   | 106 | 8 |
| O75937     | DnaJ homol  | 32.8063241  | 6 | 10 | 6 | 29.8  | 9.06  | 93  | 6 |
| AOA024R8A2 | GTPase acti | 4.70746469  | 5 | 5  | 5 | 166.1 | 5.21  | 151 | 5 |
| AOA0S2Z3W7 | Nucleotide  | 36.0824742  | 5 | 7  | 5 | 21.4  | 5.66  | 115 | 5 |
| P41227     | N-alpha-acc | 21.7021277  | 5 | 6  | 5 | 26.4  | 5.64  | 111 | 5 |
| P49756     | RNA-binding | 13.1672598  | 9 | 9  | 9 | 100.1 | 6.32  | 76  | 9 |
| AOA0S2Z5U6 | Pyrroline-ε | 21.875      | 4 | 4  | 3 | 33.6  | 7.77  | 138 | 4 |
| B8ZZN6     | Small ubiq  | 34.9315068  | 5 | 7  | 5 | 16.6  | 6.2   | 99  | 5 |
| POC0S5     | Histone H2' | 31.25       | 4 | 19 | 2 | 13.5  | 10.58 | 330 | 4 |
| O15042     | U2 snRNP-a  | 8.06608358  | 7 | 10 | 7 | 118.2 | 8.47  | 121 | 7 |
| Q8IX12     | Cell divisi | 8.60869565  | 6 | 6  | 6 | 132.7 | 5.76  | 106 | 6 |
| C9JA08     | 60S ribosom | 12.2873346  | 5 | 6  | 5 | 60.1  | 6.62  | 158 | 5 |
| O43488     | Aflatoxin E | 17.5487465  | 5 | 6  | 5 | 39.6  | 7.17  | 116 | 5 |
| Q92797     | Symplekin   | (8.55572998 | 6 | 6  | 6 | 141.1 | 6.13  | 124 | 6 |
| P51570     | Galactokin  | 24.744898   | 6 | 6  | 6 | 42.2  | 6.46  | 117 | 6 |
| Q86U42     | Polyadenyl  | 22.2222222  | 4 | 5  | 4 | 32.7  | 5.06  | 167 | 4 |
| Q59H06     | Transporter | 9.80113636  | 6 | 7  | 6 | 77.7  | 7.85  | 97  | 6 |
| P50570     | Dynamins-2  | (9.42528736 | 7 | 7  | 7 | 98    | 7.44  | 143 | 7 |
| Q6FH36     | Peptidyl-p  | 42.3728814  | 4 | 5  | 4 | 19.2  | 8.07  | 144 | 4 |
| Q9BXY0     | Protein MA  | 17          | 3 | 4  | 3 | 35.3  | 5.38  | 150 | 3 |
| Q6FII1     | Glutathione | 28.3185841  | 5 | 5  | 5 | 25.5  | 8.41  | 124 | 5 |
| Q9Y2Z0     | Protein SG  | 18.3561644  | 5 | 6  | 5 | 41    | 5.16  | 62  | 5 |
| Q52LJ0     | Protein FA  | 18.1818182  | 5 | 5  | 5 | 37.2  | 6.29  | 154 | 5 |

|            |              |             |   |    |   |       |       |     |   |
|------------|--------------|-------------|---|----|---|-------|-------|-----|---|
| Q9UIG0     | Tyrosine-pi  | 3.70869858  | 5 | 6  | 4 | 170.8 | 8.48  | 95  | 5 |
| Q5SRE5     | Nucleoporin  | 5.60320183  | 7 | 8  | 7 | 195.9 | 6.73  | 53  | 7 |
| P17813     | Endoglin     | 05.3343465  | 5 | 5  | 5 | 70.5  | 6.61  | 200 | 5 |
| Q9NX24     | H/ACA ribos  | 37.9084967  | 3 | 4  | 3 | 17.2  | 8.22  | 84  | 3 |
| Q4G0N4     | NAD kinase   | 20.8144796  | 6 | 6  | 6 | 49.4  | 8.18  | 55  | 6 |
| Q8NFH3     | Nucleoporin  | 15.5263158  | 3 | 5  | 3 | 42.1  | 5.63  | 128 | 3 |
| P13807     | Glycogen [s  | 11.6689281  | 5 | 5  | 5 | 83.7  | 6.18  | 80  | 5 |
| V9HWA0     | Aminoacyl-a  | 20.3431373  | 6 | 6  | 6 | 45.9  | 6.18  | 38  | 6 |
| Q6FGU2     | DTYMK prote  | 29.245283   | 6 | 7  | 6 | 23.8  | 8.27  | 129 | 6 |
| AOA0D9SGE8 | PHD finger   | 13.9344262  | 4 | 5  | 4 | 41.3  | 8.68  | 61  | 4 |
| P63172     | Dynein lig   | 30.0884956  | 2 | 4  | 2 | 12.4  | 5.08  | 158 | 2 |
| B2RDK6     | cDNA, FLJ9   | 15.0289017  | 5 | 5  | 2 | 38.9  | 7.87  | 117 | 5 |
| Q4VC31     | Coiled-coil  | 25.6944444  | 2 | 4  | 2 | 16.6  | 7.81  | 128 | 2 |
| Q6ICQ8     | ARHG protei  | 36.6492147  | 5 | 7  | 4 | 21.3  | 8.12  | 115 | 5 |
| BOQZ18     | Copine-1     | 05.9926199  | 6 | 8  | 6 | 59.7  | 6.04  | 161 | 6 |
| Q9NRG9     | Aladin OS=   | 12.2710623  | 5 | 5  | 5 | 59.5  | 7.5   | 130 | 5 |
| Q6IPI1     | 60S ribosom  | 22.9813665  | 6 | 11 | 6 | 17.9  | 11.66 | 149 | 6 |
| Q9UHG3     | Prenylcyste  | 7.92079208  | 3 | 5  | 3 | 56.6  | 6.18  | 136 | 3 |
| O95292     | Vesicle-as   | 23.4567901  | 4 | 5  | 4 | 27.2  | 7.3   | 125 | 4 |
| B7ZM99     | MTHFD1L pr   | 12.9724208  | 9 | 10 | 8 | 105.8 | 8.06  | 86  | 9 |
| Q9Y3D9     | 28S ribosom  | 41.5789474  | 6 | 7  | 6 | 21.8  | 8.9   | 95  | 6 |
| Q1HBJ4     | Mitogen-act  | 19.1666667  | 6 | 8  | 4 | 41.4  | 6.98  | 57  | 6 |
| Q00765     | Receptor ex  | 20.6349206  | 5 | 8  | 5 | 21.5  | 8.1   | 169 | 5 |
| E7EVH7     | Uncharacter  | 13.6612022  | 6 | 7  | 3 | 83.6  | 7.31  | 90  | 6 |
| AOA024QYY3 | Phosphorib   | 21.6802168  | 5 | 6  | 3 | 40.9  | 7.44  | 61  | 5 |
| O75494     | Serine/argi  | 18.3206107  | 4 | 6  | 4 | 31.3  | 11.27 | 21  | 4 |
| Q9H2G2     | STE20-like   | 6.15384615  | 6 | 6  | 6 | 142.6 | 5.15  | 156 | 6 |
| AOA0S2Z5H3 | Clathrin ir  | 7.46500778  | 4 | 5  | 4 | 70.3  | 6.58  | 126 | 4 |
| Q9Y570     | Protein ph   | 23.8341969  | 6 | 6  | 6 | 42.3  | 5.97  | 101 | 6 |
| Q92878     | DNA repair   | 5.10670732  | 5 | 6  | 5 | 153.8 | 6.89  | 113 | 5 |
| Q15907     | Ras-relate   | 37.6146789  | 7 | 7  | 7 | 24.5  | 5.94  | 124 | 7 |
| E5KLJ5     | Dynamin-li   | 8.57142857  | 7 | 7  | 7 | 117.7 | 7.77  | 81  | 7 |
| P05204     | Non-histone  | 45.5555556  | 2 | 9  | 2 | 9.4   | 9.99  | 48  | 2 |
| H3BND4     | Pyridoxal-   | 9.05707196  | 5 | 5  | 5 | 88.7  | 5.48  | 112 | 5 |
| Q8TCJ2     | Dolichyl-di  | 7.74818402  | 6 | 8  | 6 | 93.6  | 8.91  | 71  | 6 |
| B2R6E2     | cDNA, FLJ9   | 19.6162047  | 5 | 5  | 5 | 51.6  | 5.25  | 56  | 5 |
| O00566     | U3 small n   | 12.1879589  | 6 | 6  | 6 | 78.8  | 4.86  | 48  | 6 |
| Q9NY93     | Probable A   | 113.7111517 | 6 | 6  | 6 | 61.6  | 9.26  | 100 | 6 |
| Q9H0D6     | 5' -3' exor  | 9.36842105  | 6 | 8  | 6 | 108.5 | 7.47  | 61  | 6 |
| Q8WV80     | MTAP protei  | 29.8701299  | 3 | 4  | 1 | 17    | 7.68  | 110 | 3 |
| Q96EY7     | Pentatricoy  | 7.11175617  | 4 | 5  | 4 | 78.5  | 6.42  | 115 | 4 |
| Q13243     | Serine/argi  | 15.4411765  | 5 | 6  | 4 | 31.2  | 11.59 | 108 | 5 |
| Q9H6F5     | Coiled-coil  | 20.2777778  | 6 | 8  | 6 | 40.2  | 10.33 | 96  | 6 |
| Q8N684     | Cleavage ar  | 14.0127389  | 5 | 5  | 5 | 52    | 8     | 119 | 5 |
| Q8IZ83     | Aldehyde de  | 8.35411471  | 4 | 4  | 4 | 85.1  | 6.79  | 110 | 4 |
| AOA024R3J1 | Tripartite   | 11.7346939  | 5 | 7  | 5 | 65.8  | 7.15  | 62  | 5 |
| Q9NZZ3     | Charged mu   | 126.4840183 | 3 | 5  | 3 | 24.6  | 4.83  | 136 | 3 |
| AOA087WT44 | Heme oxygen  | 15.9459459  | 4 | 5  | 4 | 41.6  | 5.44  | 115 | 4 |
| Q9BXW7     | Cat eye syr  | 21.9858156  | 5 | 5  | 5 | 46.3  | 8.13  | 72  | 5 |
| J9JIE6     | Calcium lo   | 15.4811715  | 3 | 4  | 3 | 27.1  | 10.26 | 157 | 3 |
| Q92620     | Pre-mRNA-s   | 6.11246944  | 5 | 6  | 5 | 140.4 | 6.54  | 76  | 5 |
| Q9NTM9     | Copper hom   | 12.4542125  | 3 | 4  | 3 | 29.3  | 8.18  | 86  | 3 |
| Q9NRV9     | Heme-bindin  | 16.4021164  | 2 | 3  | 2 | 21.1  | 5.8   | 135 | 2 |
| O15160     | DNA-direct   | 16.1849711  | 4 | 4  | 4 | 39.2  | 5.5   | 132 | 4 |
| AOA024R563 | Protein ph   | 23.6180905  | 3 | 4  | 3 | 21    | 5.22  | 81  | 3 |
| Q92896     | Golgi appar  | 6.36132316  | 5 | 5  | 5 | 134.5 | 6.9   | 86  | 5 |
| Q9BRX8     | Redox-regul  | 18.3406114  | 4 | 5  | 4 | 25.7  | 8.84  | 131 | 4 |
| Q7Z2K6     | Endoplasmic  | 9.07079646  | 6 | 6  | 6 | 100.2 | 7.52  | 105 | 6 |
| O43491     | Band 4.1-l   | 19.95024876 | 6 | 8  | 6 | 112.5 | 5.44  | 130 | 6 |
| AOA140VJR2 | Testicular   | 16.0243408  | 5 | 5  | 5 | 54.5  | 6     | 103 | 5 |
| Q9Y2V2     | Calcium-reg  | 27.2108844  | 2 | 6  | 2 | 15.9  | 8.21  | 132 | 2 |
| Q5HYL4     | Putative ur  | 18.8679245  | 6 | 7  | 6 | 69.4  | 7.28  | 82  | 6 |
| P35269     | General tre  | 11.9922631  | 5 | 6  | 5 | 58.2  | 7.49  | 151 | 5 |
| Q96GK7     | Fumarylacet  | 21.9745223  | 5 | 5  | 5 | 34.6  | 8.24  | 91  | 5 |
| Q9NP79     | Vacuolar pi  | 18.8925081  | 3 | 6  | 3 | 33.9  | 6.29  | 130 | 3 |
| Q8N183     | Mimitin, m   | 30.7692308  | 4 | 5  | 4 | 19.8  | 8.97  | 109 | 4 |
| O14561     | Acyl carrier | 27.5641026  | 6 | 7  | 6 | 17.4  | 4.93  | 77  | 6 |
| Q8WXX5     | DnaJ homol   | 24.2307692  | 5 | 6  | 5 | 29.9  | 5.73  | 86  | 5 |
| Q96HS1     | Serine/thre  | 10.7266436  | 3 | 5  | 3 | 32    | 8.68  | 99  | 3 |
| AOA024R5X7 | ClpX casein  | 11.6903633  | 5 | 5  | 5 | 69.2  | 7.58  | 72  | 5 |
| H3BMV3     | Hematologic  | 32.1052632  | 4 | 5  | 4 | 20.7  | 8.13  | 66  | 4 |
| Q9Y3D0     | Mitotic spi  | 26.3803681  | 2 | 2  | 2 | 17.7  | 5.19  | 128 | 2 |
| Q5BKZ1     | DBIRD comp   | 18.59106529 | 4 | 5  | 4 | 65.6  | 5.15  | 149 | 4 |

|            |             |               |   |    |   |       |       |     |   |
|------------|-------------|---------------|---|----|---|-------|-------|-----|---|
| F8WCF6     | Actin-relat | 35.9116022    | 6 | 7  | 6 | 21    | 8.76  | 115 | 6 |
| Q5T1J5     | Putative cc | 27.1523179    | 2 | 4  | 2 | 15.5  | 9.89  | 87  | 2 |
| Q53HJ8     | PKCI-1-rel  | 12.2699387    | 1 | 2  | 1 | 17.2  | 9.48  | 192 | 1 |
| AOA024RE04 | Uncharacter | 12.5827815    | 4 | 5  | 4 | 52.1  | 8.47  | 144 | 4 |
| AOA087WTW0 | E3 ubiquiti | 8.51808635    | 7 | 7  | 7 | 96.6  | 8.34  | 100 | 7 |
| P35249     | Replicatio  | 20.9366391    | 6 | 6  | 6 | 39.7  | 8.02  | 125 | 6 |
| P48634     | Protein PR  | 4.26518312    | 5 | 5  | 5 | 228.7 | 9.45  | 36  | 5 |
| Q9BV38     | WD repeat-  | 18.5185185    | 5 | 5  | 5 | 47.4  | 6.7   | 40  | 5 |
| Q99805     | Transmembr  | 6.18401207    | 3 | 5  | 3 | 75.7  | 7.44  | 47  | 3 |
| O95202     | LETM1 and   | 12.1786198    | 6 | 6  | 6 | 83.3  | 6.7   | 74  | 6 |
| AOA024RAD5 | Dolichyl-d  | 12.9385965    | 6 | 8  | 6 | 50.7  | 6.4   | 185 | 6 |
| P16278     | Beta-galac  | 19.74889217   | 5 | 6  | 5 | 76    | 6.57  | 121 | 5 |
| B2RE40     | cDNA, FLJ   | 914.1843972   | 2 | 3  | 2 | 31.5  | 4.59  | 44  | 2 |
| D6REX3     | Protein tr  | 4.55635492    | 5 | 6  | 5 | 136.1 | 6.98  | 121 | 5 |
| Q13573     | SNW domain  | 15.858209     | 5 | 6  | 5 | 61.5  | 9.52  | 104 | 5 |
| B5MBZ0     | Echinoderm  | 5.74596774    | 4 | 4  | 4 | 110.1 | 6.49  | 106 | 4 |
| P62314     | Small nucle | 28.5714286    | 2 | 5  | 2 | 13.3  | 11.56 | 100 | 2 |
| Q9NYK5     | 39S riboso  | 13.0177515    | 4 | 5  | 4 | 38.7  | 7.65  | 129 | 4 |
| P28072     | Proteasome  | 20.9205021    | 6 | 10 | 6 | 25.3  | 4.92  | 126 | 6 |
| Q8N5N7     | 39S riboso  | 34.1772152    | 3 | 4  | 3 | 18.3  | 7.88  | 140 | 3 |
| P61020     | Ras-relate  | 24.1860465    | 5 | 6  | 1 | 23.7  | 8.13  | 174 | 5 |
| Q59EH3     | Acid phosp  | 24.2424242    | 4 | 4  | 4 | 18.7  | 7.88  | 172 | 4 |
| AOA1BOGUA3 | KIF1-bindir | 6.81114551    | 3 | 5  | 3 | 74.7  | 5.76  | 138 | 3 |
| F8VVA7     | Coatomer s  | 19.1919192    | 2 | 4  | 2 | 22.3  | 4.89  | 98  | 2 |
| Q96EK6     | Glucosamin  | 22.826087     | 3 | 4  | 3 | 20.7  | 7.99  | 163 | 3 |
| P34949     | Mannose-6-  | 19.858156     | 5 | 6  | 5 | 46.6  | 5.95  | 86  | 5 |
| Q9UHV9     | Prefoldin   | 31.8181818    | 4 | 5  | 4 | 16.6  | 6.58  | 156 | 4 |
| O75569     | Interferon  | -19.8083067   | 3 | 3  | 3 | 34.4  | 8.41  | 110 | 3 |
| Q96CS3     | FAS-associ  | 15.7303371    | 5 | 5  | 5 | 52.6  | 5.62  | 110 | 5 |
| B4DS79     | cDNA FLJ    | 5619.0380762  | 6 | 7  | 4 | 53.8  | 4.69  | 62  | 6 |
| Q14376     | UDP-glucos  | 20.1149425    | 6 | 6  | 6 | 38.3  | 6.73  | 111 | 6 |
| Q53EL1     | Protein KI  | 5.49828179    | 5 | 5  | 5 | 134.8 | 7.06  | 110 | 5 |
| AOA140VJW2 | Stathmin    | 0521.2643678  | 3 | 9  | 3 | 19.8  | 7.02  | 158 | 3 |
| AOA024QYX3 | RNA bindin  | 25.477707     | 3 | 5  | 3 | 17.2  | 8.91  | 114 | 3 |
| O00233     | 26S protea  | 29.1479821    | 5 | 6  | 5 | 24.7  | 6.95  | 78  | 5 |
| A8K6X9     | cDNA FLJ    | 7625.62659847 | 4 | 5  | 4 | 133.4 | 6.77  | 77  | 4 |
| Q9NUQ3     | Gamma-taxi  | 12.1212121    | 5 | 7  | 4 | 60.5  | 7.52  | 61  | 5 |
| B2RNR6     | Zinc finger | 7.54189944    | 5 | 5  | 5 | 116.9 | 9.04  | 155 | 5 |
| P61026     | Ras-relate  | 38            | 8 | 11 | 5 | 22.5  | 8.38  | 192 | 8 |
| B2RBB2     | cDNA, FLJ   | 910.990991    | 4 | 5  | 4 | 61.6  | 6.49  | 66  | 4 |
| P55263     | Adenosine   | 119.8895028   | 8 | 8  | 8 | 40.5  | 6.7   | 101 | 8 |
| Q13451     | Peptidyl-p  | 10.2844639    | 4 | 5  | 4 | 51.2  | 5.9   | 109 | 4 |
| Q99622     | Protein C1  | 28.5714286    | 2 | 3  | 2 | 13.2  | 5.14  | 132 | 2 |
| Q15286     | Ras-relate  | 23.880597     | 4 | 8  | 2 | 23    | 8.29  | 172 | 4 |
| AOA024R2W3 | Protein kir | 9.40594059    | 3 | 4  | 3 | 45.5  | 5.07  | 121 | 3 |
| Q96A33     | Coiled-coil | 13.0434783    | 5 | 6  | 5 | 55.8  | 4.87  | 74  | 5 |
| P18583     | Protein S0  | 3.91591096    | 7 | 7  | 5 | 263.7 | 5.64  | 89  | 7 |
| Q86UK7     | E3 ubiquiti | 6.4159292     | 4 | 4  | 4 | 98.6  | 8.4   | 127 | 4 |
| P56556     | NADH dehyd  | 29.2207792    | 4 | 6  | 4 | 17.9  | 10.14 | 67  | 4 |
| Q9NPD3     | Exosome con | 17.5510204    | 3 | 4  | 3 | 26.4  | 6.52  | 90  | 3 |
| O94874     | E3 UFM1-pr  | 11.0831234    | 7 | 7  | 7 | 89.5  | 6.79  | 21  | 7 |
| O15294     | UDP-N-acety | 6.02294455    | 4 | 4  | 4 | 116.9 | 6.7   | 93  | 4 |
| P80217     | Interferon  | -12.5874126   | 2 | 3  | 2 | 31.5  | 6.09  | 124 | 2 |
| E7ERK9     | Translatio  | 17.2794118    | 5 | 6  | 5 | 59.7  | 9.42  | 89  | 5 |
| Q15833     | Syntaxin-b  | 10.455312     | 4 | 4  | 4 | 66.4  | 6.55  | 59  | 4 |
| Q9BY43     | Charged mul | 25.2252252    | 4 | 4  | 4 | 25.1  | 4.7   | 151 | 4 |
| Q71RC2     | La-related  | 10.4972376    | 4 | 5  | 4 | 80.5  | 6.61  | 142 | 4 |
| Q6LES2     | Annexin (F  | 16.8224299    | 4 | 5  | 4 | 36.1  | 6.13  | 112 | 4 |
| O95881     | Thioredoxin | 31.9767442    | 5 | 9  | 5 | 19.2  | 5.4   | 66  | 5 |
| AOA024R1U2 | PHD finger  | 41.8181818    | 4 | 4  | 4 | 12.4  | 8.41  | 147 | 4 |
| Q9H4A6     | Golgi phos  | 19.7986577    | 4 | 4  | 4 | 33.8  | 6.44  | 105 | 4 |
| AOA087WUB9 | Beta-cateni | 12.3239437    | 7 | 8  | 7 | 65.7  | 5.02  | 110 | 7 |
| Q9BW72     | HIG1 domai  | 30.1886792    | 3 | 3  | 3 | 11.5  | 10.2  | 75  | 3 |
| AOA0B4J1V8 | HCG203999   | 6.7.30478589  | 4 | 4  | 4 | 87.9  | 9.51  | 156 | 4 |
| Q6NUL6     | PITPNA pro  | 16.1392405    | 4 | 7  | 2 | 35.9  | 8.05  | 96  | 4 |
| C9J5N1     | PTGES3L-AA  | 8.48484848    | 2 | 3  | 2 | 55    | 6.55  | 67  | 2 |
| B2RDN4     | Ribosome bi | 8.1769437     | 4 | 5  | 4 | 83.5  | 6.19  | 132 | 4 |
| Q9HAV7     | GrpE protei | 30.4147465    | 4 | 6  | 4 | 24.3  | 8.12  | 55  | 4 |
| B4DZF8     | Serine/thre | 14.973262     | 5 | 5  | 5 | 42.1  | 5.8   | 101 | 5 |
| Q16718     | NADH dehyd  | 57.7586207    | 4 | 4  | 4 | 13.5  | 5.99  | 65  | 4 |
| Q01581     | Hydroxymet  | 14.4230769    | 5 | 5  | 5 | 57.3  | 5.41  | 101 | 5 |
| AOA087XOR6 | Sorting ne  | 23.255814     | 4 | 6  | 3 | 19.8  | 7.78  | 79  | 4 |
| P57740     | Nuclear poi | 7.67567568    | 6 | 7  | 6 | 106.3 | 5.43  | 113 | 6 |

|            |             |             |   |   |   |       |       |     |   |
|------------|-------------|-------------|---|---|---|-------|-------|-----|---|
| HOY8X4     | 2'-deoxynuc | 10.6995885  | 3 | 4 | 3 | 25.9  | 5.5   | 131 | 3 |
| E5KS95     | Elongation  | 20.3076923  | 5 | 5 | 5 | 35.4  | 8.38  | 88  | 5 |
| Q9Y6M9     | NADH dehydr | 32.4022346  | 4 | 5 | 4 | 21.8  | 8.38  | 100 | 4 |
| Q9NTJ5     | Phosphatidy | 10.5621806  | 6 | 7 | 6 | 66.9  | 7.12  | 129 | 6 |
| Q8NB16     | Mixed line  | 14.4373673  | 5 | 6 | 5 | 54.4  | 8.82  | 70  | 5 |
| O75691     | Small subu  | 3.26750449  | 8 | 8 | 8 | 318.2 | 7.39  | 56  | 8 |
| I3L3T0     | HCG15164,   | i30.3448276 | 3 | 3 | 3 | 15.9  | 9.92  | 155 | 3 |
| AOA024R8Z9 | Aspartyl-tf | 10.8527132  | 5 | 5 | 5 | 73.5  | 8.02  | 108 | 5 |
| Q9UI26     | Importin-1  | 18.82051282 | 5 | 5 | 5 | 112.5 | 5.25  | 114 | 5 |
| Q06265     | Exosome con | 11.3895216  | 4 | 4 | 4 | 48.9  | 5.29  | 134 | 4 |
| AOA0AOMT49 | Transcripti | 3.68828079  | 5 | 5 | 5 | 188.7 | 8.12  | 72  | 5 |
| Q92747     | Actin-relat | 10.8108108  | 2 | 2 | 1 | 41.5  | 8.18  | 81  | 2 |
| Q9Y520     | Protein PRF | 3.03867403  | 6 | 7 | 6 | 316.7 | 9.13  | 88  | 6 |
| O75934     | Pre-mRNA-s  | 22.6666667  | 3 | 4 | 3 | 26.1  | 5.66  | 87  | 3 |
| Q9H773     | dCTP pyrop  | 42.9411765  | 6 | 6 | 6 | 18.7  | 5.03  | 63  | 6 |
| Q9Y3C1     | Nucleolar p | 30.8988764  | 5 | 5 | 5 | 21.2  | 9.94  | 82  | 5 |
| P14174     | Macrophage  | 20.8695652  | 3 | 9 | 3 | 12.5  | 7.88  | 214 | 3 |
| P61011     | Signal rec  | 11.7063492  | 5 | 5 | 5 | 55.7  | 8.75  | 90  | 5 |
| Q9Y2Z4     | Tyrosine--  | 14.4654088  | 4 | 5 | 4 | 53.2  | 8.98  | 118 | 4 |
| AOA024R7I3 | RAB8A, mem  | 26.0869565  | 5 | 8 | 2 | 23.7  | 9.07  | 227 | 5 |
| Q99720     | Sigma non-c | 17.0403587  | 3 | 4 | 3 | 25.1  | 5.96  | 98  | 3 |
| AOA024RBV9 | Transducin  | 9.70537262  | 3 | 6 | 1 | 62.5  | 6.55  | 83  | 3 |
| B4DJV9     | cDNA FLJ60  | 14.4486692  | 3 | 5 | 3 | 28.3  | 7.64  | 166 | 3 |
| Q9Y3B4     | Splicing f  | 20.8        | 2 | 3 | 2 | 14.6  | 9.38  | 99  | 2 |
| Q6IB11     | PGRMC1 prot | 24.6153846  | 6 | 7 | 5 | 21.7  | 4.7   | 146 | 6 |
| Q8WXI9     | Transcripti | 10.455312   | 5 | 5 | 4 | 65.2  | 9.7   | 112 | 5 |
| AOA068F658 | Glucosylce  | 11.7537313  | 5 | 5 | 5 | 59.7  | 7.61  | 71  | 5 |
| O60306     | Intron-binc | 3.5016835   | 4 | 5 | 4 | 171.2 | 6.37  | 56  | 4 |
| MOQXF9     | Branched-cl | 9.43820225  | 2 | 3 | 2 | 49.9  | 7.46  | 119 | 2 |
| Q5RKV6     | Exosome con | 24.6323529  | 4 | 4 | 4 | 28.2  | 6.28  | 77  | 4 |
| Q6PL18     | ATPase fami | 5.32374101  | 4 | 4 | 4 | 158.5 | 6.32  | 55  | 4 |
| AOA024R6S1 | DnaJ (Hsp4  | 16.9902913  | 5 | 8 | 5 | 45.7  | 6.48  | 93  | 5 |
| P11717     | Cation-inde | 4.13488559  | 8 | 8 | 8 | 274.2 | 5.94  | 47  | 8 |
| Q7Z2Z2     | Elongation  | 6.96428571  | 6 | 6 | 6 | 125.4 | 5.91  | 113 | 6 |
| P62306     | Small nucl  | 43.0232558  | 3 | 8 | 3 | 9.7   | 4.67  | 88  | 3 |
| P23258     | Tubulin gan | 17.2949002  | 4 | 4 | 4 | 51.1  | 6.14  | 88  | 4 |
| Q9H0B6     | Kinesin li  | 11.2540193  | 4 | 5 | 1 | 68.9  | 7.15  | 61  | 4 |
| Q9Y512     | Sorting anc | 12.3667377  | 6 | 8 | 6 | 51.9  | 6.9   | 97  | 6 |
| AOA0AOMR66 | RNA bindin  | 5.42713568  | 3 | 3 | 3 | 110.3 | 6.28  | 130 | 3 |
| Q9HC06     | Cd002 prot  | 19.6382429  | 5 | 5 | 5 | 43.5  | 5.77  | 81  | 5 |
| A6NDU8     | UPF0600 pr  | 20.7482993  | 4 | 4 | 4 | 33.6  | 5.26  | 82  | 4 |
| Q13572     | Inositol-t  | 12.5603865  | 3 | 6 | 3 | 45.6  | 6.16  | 60  | 3 |
| AOA0S2Z3G3 | Solute carr | 22.972973   | 5 | 6 | 5 | 32.1  | 9.35  | 65  | 5 |
| P53634     | Dipeptidyl  | 13.8228942  | 5 | 6 | 5 | 51.8  | 6.99  | 88  | 5 |
| Q5VW32     | BRO1 domai  | 12.1654501  | 3 | 3 | 3 | 46.4  | 7.65  | 149 | 3 |
| Q6IBN6     | CBX1 protei | 18.3783784  | 2 | 4 | 1 | 21.4  | 4.93  | 143 | 2 |
| AOA0X1KG71 | Negative e  | 12.4203822  | 6 | 6 | 6 | 70    | 6.04  | 95  | 6 |
| D6RFF8     | Glucosamin  | 24.4827586  | 4 | 4 | 4 | 32.4  | 6.46  | 62  | 4 |
| AOA024R957 | Torsin A ir | 19.5744681  | 5 | 6 | 4 | 51.2  | 4.96  | 52  | 5 |
| Q9UBS4     | DnaJ homol  | 15.6424581  | 5 | 5 | 5 | 40.5  | 6.18  | 89  | 5 |
| Q9NP72     | Ras-relate  | 25.2427184  | 4 | 4 | 4 | 23    | 5.24  | 80  | 4 |
| Q6PIJ9     | Parafibromi | 10.3578154  | 5 | 5 | 5 | 60.5  | 9.61  | 67  | 5 |
| Q86W42     | THO comple  | 8.50439883  | 3 | 4 | 3 | 37.5  | 7.43  | 114 | 3 |
| O60341     | Lysine-spec | 7.62910798  | 5 | 6 | 5 | 92.8  | 6.52  | 76  | 5 |
| AOA0S2Z4R4 | Hepatocyte  | 8.49420849  | 5 | 5 | 5 | 86.1  | 6.16  | 99  | 5 |
| P28799     | Granulins   | (12.6475548 | 4 | 4 | 4 | 63.5  | 6.83  | 65  | 4 |
| Q8NCG7     | Sn1-specifi | 11.3095238  | 5 | 5 | 5 | 73.7  | 6.55  | 85  | 5 |
| Q5M775     | Cytospin-B  | 3.08988764  | 2 | 3 | 2 | 118.5 | 6.7   | 0   | 2 |
| Q6FI81     | Anamorsin   | (22.4358974 | 4 | 4 | 4 | 33.6  | 5.62  | 82  | 4 |
| P14735     | Insulin-de  | 8.43964671  | 5 | 6 | 5 | 117.9 | 6.61  | 0   | 5 |
| Q15067     | Peroxisoma  | 18.03030303 | 3 | 4 | 3 | 74.4  | 8.16  | 38  | 3 |
| Q7Z4V5     | Hepatoma-d  | 6.40834575  | 5 | 6 | 3 | 74.3  | 7.49  | 92  | 5 |
| L7RXH5     | Mitogen-act | 11.6094987  | 3 | 5 | 1 | 43.1  | 6.74  | 61  | 3 |
| Q14257     | Reticulocal | 16.0883281  | 3 | 3 | 3 | 36.9  | 4.4   | 62  | 3 |
| Q9Y333     | U6 snRNA-a  | 28.4210526  | 2 | 3 | 2 | 10.8  | 6.52  | 126 | 2 |
| P52788     | Spermine s  | 15.8469945  | 4 | 5 | 4 | 41.2  | 5.02  | 77  | 4 |
| P46459     | Vesicle-fu  | 7.79569892  | 5 | 5 | 5 | 82.5  | 6.95  | 100 | 5 |
| R9S3C3     | p14ARF/p16  | 121.7647059 | 4 | 4 | 1 | 18.5  | 11.68 | 119 | 4 |
| B4DJ38     | cDNA FLJ56  | (4.53938585 | 3 | 6 | 3 | 84.1  | 8.57  | 164 | 3 |
| P13674     | Prolyl 4-h  | 12.9213483  | 5 | 5 | 5 | 61    | 6.01  | 81  | 5 |
| Q92538     | Golgi-speci | 4.24959656  | 6 | 6 | 5 | 206.3 | 5.73  | 97  | 6 |
| B4DT57     | cDNA FLJ61  | (10.6666667 | 3 | 4 | 2 | 50    | 5.6   | 151 | 3 |
| Q69YJ7     | Putative ur | 6.39412998  | 7 | 7 | 7 | 100.1 | 8.91  | 33  | 7 |

|            |               |              |   |    |   |       |       |     |   |
|------------|---------------|--------------|---|----|---|-------|-------|-----|---|
| P06454     | Prothymosin   | 25.2252252   | 2 | 24 | 2 | 12.2  | 3.78  | 533 | 2 |
| P62304     | Small nucleol | 56.5217391   | 4 | 5  | 4 | 10.8  | 9.44  | 131 | 4 |
| O75431     | Metaxin-2     | (19.391635   | 3 | 4  | 3 | 29.7  | 6.29  | 71  | 3 |
| P42345     | Serine/thr    | 2.15770891   | 3 | 3  | 3 | 288.7 | 7.17  | 147 | 3 |
| Q9Y3Y2     | Chromatin     | 116.1290323  | 4 | 4  | 4 | 26.4  | 12.23 | 106 | 4 |
| P21912     | Succinate     | c21.0714286  | 4 | 4  | 4 | 31.6  | 8.76  | 100 | 4 |
| B0QYN7     | SUMO-conjug   | 33.6956522   | 6 | 6  | 6 | 20.4  | 8.46  | 111 | 6 |
| Q96AT9     | Ribulose-p    | 12.7192982   | 2 | 3  | 2 | 24.9  | 5.58  | 111 | 2 |
| O95071     | E3 ubiquiti   | 3.21543408   | 5 | 6  | 5 | 309.2 | 5.85  | 89  | 5 |
| Q9H8Y5     | Ankyrin re    | 11.2947658   | 6 | 6  | 6 | 80.9  | 8.41  | 55  | 6 |
| O60216     | Double-str    | 8.08240887   | 4 | 4  | 4 | 71.6  | 4.65  | 69  | 4 |
| O43159     | Ribosomal     | F8.11403509  | 3 | 4  | 3 | 50.7  | 9.42  | 164 | 3 |
| B5BU61     | Histone de    | 16.3900415   | 7 | 8  | 3 | 55    | 5.48  | 60  | 7 |
| C9JJ19     | 28S ribos     | 31.1111111   | 6 | 8  | 6 | 26.3  | 9.89  | 87  | 6 |
| Q9UNE7     | E3 ubiquiti   | 21.7821782   | 6 | 6  | 6 | 34.8  | 5.87  | 76  | 6 |
| P06132     | Uroporphyr    | 17.4386921   | 6 | 6  | 6 | 40.8  | 6.14  | 34  | 6 |
| P17480     | Nucleolar     | 17.72251309  | 4 | 4  | 4 | 89.4  | 5.81  | 71  | 4 |
| E5RFR7     | Tumor prote   | 26.1261261   | 2 | 3  | 1 | 12.4  | 4.68  | 101 | 2 |
| J3QLS3     | 28S ribos     | 19.1881919   | 4 | 4  | 4 | 31.7  | 9.86  | 75  | 4 |
| Q92665     | 28S ribos     | 12.1518987   | 3 | 8  | 3 | 45.3  | 9.29  | 124 | 3 |
| P28288     | ATP-binding   | 13.6570561   | 7 | 7  | 6 | 75.4  | 9.36  | 64  | 7 |
| Q9GZR7     | ATP-depend    | 10.9429569   | 8 | 8  | 8 | 96.3  | 9.06  | 32  | 8 |
| Q9BYD6     | 39S ribos     | 15.3846154   | 5 | 5  | 5 | 36.9  | 8.78  | 106 | 5 |
| A1L3A7     | Nuclear fr    | 8.48920863   | 4 | 4  | 4 | 76.1  | 8.7   | 66  | 4 |
| P09543     | 2',3'-cycli   | 13.3016627   | 4 | 6  | 3 | 47.5  | 9.07  | 68  | 4 |
| Q8N766     | ER membran    | 8.1570997    | 5 | 5  | 5 | 111.7 | 7.66  | 83  | 5 |
| Q9UDW1     | Cytochrome    | 38.0952381   | 2 | 3  | 2 | 7.3   | 9.47  | 105 | 2 |
| S4R3N1     | HSPE1-MOB     | 4.19.1570881 | 5 | 9  | 1 | 29.7  | 6.16  | 141 | 5 |
| A8K3B6     | Tyrosine-p    | 14.6666667   | 5 | 6  | 5 | 50.7  | 7.06  | 76  | 5 |
| B5ME97     | Septin 10,    | 10.6617647   | 5 | 5  | 5 | 62.9  | 6.83  | 61  | 5 |
| B3KMV8     | cDNA FLJ1     | 27.2743363   | 7 | 7  | 2 | 74.7  | 8.38  | 81  | 7 |
| Q13228     | Selenium-bi   | 13.3474576   | 3 | 3  | 3 | 52.4  | 6.37  | 68  | 3 |
| Q99543     | DnaJ homol    | 11.2721417   | 5 | 5  | 5 | 72    | 8.7   | 92  | 5 |
| B4E303     | cDNA FLJ5     | 7.14.6726862 | 5 | 5  | 5 | 48.6  | 6.61  | 61  | 5 |
| P53597     | Succinate     | --15.0289017 | 4 | 4  | 4 | 36.2  | 8.79  | 91  | 4 |
| O95394     | Phosphoace    | 13.8376384   | 7 | 8  | 7 | 59.8  | 6.25  | 93  | 7 |
| Q9UNF0     | Protein kir   | 9.87654321   | 4 | 4  | 4 | 55.7  | 5.2   | 78  | 4 |
| Q96TA2     | ATP-depend    | 6.59767141   | 4 | 4  | 4 | 86.4  | 8.76  | 94  | 4 |
| P49821     | NADH dehyd    | 17.887931    | 5 | 5  | 5 | 50.8  | 8.21  | 0   | 5 |
| HOY368     | Dolichol-p    | 20.3389831   | 4 | 4  | 4 | 33.3  | 9.14  | 110 | 4 |
| Q92552     | 28S ribos     | 17.8743961   | 5 | 6  | 5 | 47.6  | 6.18  | 64  | 5 |
| P52306     | Rap1 GPase    | 9.88467875   | 3 | 5  | 3 | 66.3  | 5.31  | 80  | 3 |
| B4E0L0     | cDNA FLJ5     | 4.16.4383562 | 4 | 4  | 4 | 48.1  | 9.92  | 77  | 4 |
| Q96N66     | Lysophosph    | 13.3474576   | 4 | 5  | 4 | 52.7  | 8.97  | 132 | 4 |
| Q9UKV8     | Protein arg   | 7.33410943   | 4 | 4  | 4 | 97.1  | 9.19  | 90  | 4 |
| Q07812     | Apoptosis     | 117.7083333  | 3 | 3  | 3 | 21.2  | 5.22  | 131 | 3 |
| Q14318     | Peptidyl-p    | 9.70873786   | 3 | 3  | 3 | 44.5  | 4.84  | 114 | 3 |
| Q9Y237     | Peptidyl-p    | 41.9847328   | 3 | 3  | 3 | 13.8  | 9.77  | 96  | 3 |
| F8VXC8     | SWI/SNF con   | 2.40963855   | 2 | 3  | 1 | 136.1 | 5.71  | 95  | 2 |
| AOA024RBL4 | RNA binding   | 6.82110682   | 4 | 4  | 4 | 86.8  | 6.27  | 110 | 4 |
| Q4LE38     | IKBKAP vari   | 4.02384501   | 4 | 5  | 4 | 151.4 | 6     | 45  | 4 |
| AOA024R7J0 | Protein kir   | 17.0940171   | 4 | 4  | 4 | 40.6  | 8.79  | 69  | 4 |
| P14854     | Cytochrome    | 44.1860465   | 3 | 4  | 3 | 10.2  | 7.05  | 56  | 3 |
| AOA075B6F9 | Nitric oxid   | 13.4868421   | 3 | 4  | 3 | 33.4  | 8.72  | 97  | 3 |
| P35251     | Replicatio    | 5.22648084   | 4 | 4  | 4 | 128.2 | 9.36  | 145 | 4 |
| P41214     | Eukaryotic    | 11.6438356   | 4 | 4  | 4 | 64.7  | 7.65  | 90  | 4 |
| P54920     | Alpha-solut   | 24.4067797   | 4 | 4  | 4 | 33.2  | 5.36  | 95  | 4 |
| X6RLX0     | ELKS/Rab6     | -i4.28571429 | 3 | 3  | 3 | 128.4 | 5.97  | 92  | 3 |
| MOQWZ7     | Serine--tr    | 10.4247104   | 4 | 4  | 4 | 58.1  | 8.28  | 82  | 4 |
| AOA024R880 | Cyclin-dep    | 13.4408602   | 5 | 5  | 3 | 42.8  | 8.79  | 149 | 5 |
| A0MZ66     | Shootin-1     | (14.7385103  | 6 | 6  | 6 | 71.6  | 5.33  | 0   | 6 |
| Q6NZI2     | Polymerase    | 11.7948718   | 3 | 3  | 3 | 43.5  | 5.6   | 85  | 3 |
| B2R5Y4     | cDNA, FLJ9    | 2.10.951526  | 6 | 7  | 6 | 65.6  | 6.64  | 64  | 6 |
| AOA024R8G3 | Prostaglan    | 21.0526316   | 3 | 6  | 3 | 21    | 7.8   | 209 | 3 |
| AOA024R333 | Transmembr    | 13.4185304   | 5 | 6  | 5 | 35.1  | 7.69  | 82  | 5 |
| Q13636     | Ras-relate    | 12.8865979   | 2 | 4  | 1 | 21.6  | 7.06  | 194 | 2 |
| AOA024R8J2 | Protein tyr   | 25.433526    | 4 | 4  | 4 | 19.8  | 8.97  | 78  | 4 |
| Q9Y6A9     | Signal pept   | 31.372549    | 2 | 3  | 2 | 11.8  | 9.31  | 103 | 2 |
| Q9NXG2     | THUMP dom     | 11.6147309   | 4 | 4  | 4 | 39.3  | 7.88  | 93  | 4 |
| Q9Y2L1     | Exosome con   | 4.69728601   | 4 | 4  | 4 | 108.9 | 7.14  | 103 | 4 |
| Q9Y2R4     | Probable A    | 17.17863105  | 3 | 4  | 3 | 67.5  | 9.67  | 115 | 3 |
| O95801     | Tetratric     | 18.3462532   | 5 | 5  | 5 | 44.7  | 5.6   | 39  | 5 |
| P05026     | Sodium/pot    | 19.1419142   | 5 | 5  | 5 | 35    | 8.53  | 89  | 5 |

|            |              |              |   |    |   |       |       |     |   |
|------------|--------------|--------------|---|----|---|-------|-------|-----|---|
| Q15843     | NEDD8 OS=Hc  | 34.5679012   | 2 | 3  | 2 | 9.1   | 8.43  | 131 | 2 |
| P09669     | Cytochrome   | 40           | 3 | 5  | 3 | 8.8   | 10.39 | 48  | 3 |
| Q9UBU9     | Nuclear RN   | 9.20840065   | 4 | 4  | 4 | 70.1  | 8.51  | 123 | 4 |
| Q9UBI6     | Guanine nuc  | 61.1111111   | 4 | 4  | 4 | 8     | 8.97  | 89  | 4 |
| B2R5S3     | cDNA, FLJ9   | 15.536105    | 4 | 6  | 4 | 50.2  | 8.31  | 69  | 4 |
| O94888     | UBX domain   | 6.3394683    | 2 | 4  | 2 | 54.8  | 5.16  | 96  | 2 |
| AOA096LPI6 | Uncharacteri | 18.9964158   | 4 | 5  | 3 | 30.5  | 7.87  | 66  | 4 |
| AOA087WV05 | Uncharacteri | 51.8181818   | 4 | 4  | 4 | 12.7  | 6.02  | 60  | 4 |
| Q9Y4W6     | AFG3-like    | 7.02634881   | 4 | 4  | 4 | 88.5  | 8.66  | 89  | 4 |
| Q9H845     | Acyl-CoA de  | 7.08534622   | 3 | 3  | 3 | 68.7  | 7.96  | 108 | 3 |
| P78318     | Immunoglobl  | 18.879056    | 5 | 5  | 5 | 39.2  | 5.38  | 46  | 5 |
| Q9Y2S7     | Polymerase   | 16.3043478   | 5 | 5  | 5 | 42    | 8.63  | 67  | 5 |
| P62273     | 40S ribosom  | 48.2142857   | 3 | 6  | 3 | 6.7   | 10.13 | 84  | 3 |
| Q9NYL4     | Peptidyl-pi  | 23.880597    | 3 | 5  | 3 | 22.2  | 9.39  | 105 | 3 |
| Q15003     | Condensin c  | 5.12820513   | 4 | 5  | 4 | 82.5  | 5.06  | 86  | 4 |
| P53041     | Serine/thre  | 11.4228457   | 5 | 5  | 5 | 56.8  | 6.28  | 82  | 5 |
| AOA087WYQ7 | Kynurenina   | 15.9235669   | 3 | 6  | 1 | 17.4  | 6.28  | 66  | 3 |
| Q16762     | Thiosulfate  | 16.8350168   | 4 | 5  | 4 | 33.4  | 7.25  | 78  | 4 |
| Q9Y6M5     | Zinc trans   | 9.0729783    | 2 | 3  | 2 | 55.3  | 6.48  | 23  | 2 |
| AOPK02     | PLXNB2 prot  | 11.302682    | 3 | 4  | 1 | 56.2  | 6.58  | 0   | 3 |
| Q5T1Z8     | Pumilio hom  | 5.96405229   | 5 | 5  | 5 | 130   | 6.9   | 78  | 5 |
| Q8TCT9     | Minor hist   | 14.5888594   | 4 | 5  | 4 | 41.5  | 6.43  | 77  | 4 |
| Q8NE86     | Calcium uni  | 15.954416    | 4 | 4  | 4 | 39.8  | 8.65  | 40  | 4 |
| Q9Y3B8     | Oligoribom   | 24.4725738   | 4 | 4  | 4 | 26.8  | 6.87  | 46  | 4 |
| Q9BW27     | Nuclear por  | 9.60365854   | 4 | 4  | 4 | 75    | 5.55  | 59  | 4 |
| P61086     | Ubiquitin-c  | 23.5         | 4 | 5  | 4 | 22.4  | 5.44  | 98  | 4 |
| Q6NVY1     | 3-hydroxy    | 15.0259067   | 5 | 5  | 5 | 43.5  | 8.19  | 101 | 5 |
| Q5T653     | 39S ribosom  | 15.4098361   | 2 | 2  | 2 | 33.3  | 11.3  | 44  | 2 |
| AOA087WZE9 | High mobil   | 11.5384615   | 1 | 5  | 1 | 13.9  | 9.91  | 46  | 1 |
| Q9HCD5     | Nuclear rec  | 10.7081174   | 4 | 6  | 4 | 65.5  | 9.6   | 120 | 4 |
| AOA0AOMST8 | Anion exche  | 2.91423813   | 3 | 4  | 2 | 134.5 | 6.81  | 157 | 3 |
| B5BUD2     | Replicatio   | 16.1016949   | 4 | 4  | 4 | 39.2  | 6.44  | 66  | 4 |
| Q9H0W9     | Ester hydr   | 13.968254    | 4 | 5  | 4 | 35.1  | 6.7   | 78  | 4 |
| AOA0AOMQX8 | Muscleblin   | 14.5         | 4 | 4  | 4 | 43    | 8.82  | 34  | 4 |
| Q08379     | Golgin sub   | 15.38922156  | 4 | 4  | 4 | 113   | 5.02  | 100 | 4 |
| A8K2G0     | Secretory c  | 18.6390533   | 3 | 3  | 3 | 37.8  | 7.11  | 69  | 3 |
| Q8NBU5     | ATPase fami  | 21.0526316   | 4 | 4  | 4 | 40.7  | 6.9   | 17  | 4 |
| Q5TEC6     | Histone H3   | 48.5294118   | 6 | 14 | 2 | 15.4  | 11.27 | 184 | 6 |
| AOA0AOMT64 | NADPH:adre   | 13.4831461   | 4 | 4  | 4 | 58.2  | 7.87  | 95  | 4 |
| Q96IX5     | Up-regulat   | 44.8275862   | 3 | 3  | 3 | 6.5   | 9.76  | 105 | 3 |
| E5KND5     | Elongation   | 9.45406125   | 6 | 6  | 6 | 83.4  | 7.01  | 88  | 6 |
| Q92541     | RNA polymer  | 3.52112676   | 3 | 4  | 3 | 80.3  | 8.15  | 72  | 3 |
| I1E4Y6     | PERQ amino   | 3.86071158   | 3 | 3  | 3 | 152.4 | 5.6   | 104 | 3 |
| AOA140VKC8 | Testis tis   | 16.1993769   | 3 | 3  | 3 | 35.9  | 6.6   | 68  | 3 |
| Q9BQ87     | F-box-like   | 6.32183908   | 3 | 4  | 1 | 56.7  | 5.62  | 97  | 3 |
| B7Z4M1     | Reticulon    | 12.195122    | 1 | 2  | 1 | 12.7  | 7.83  | 142 | 1 |
| A8K8F6     | cDNA FLJ7    | 17.3669468   | 5 | 5  | 5 | 41.4  | 9.06  | 42  | 5 |
| P05362     | Intercellu   | 9.58646617   | 4 | 4  | 4 | 57.8  | 7.99  | 76  | 4 |
| B3KNS8     | cDNA FLJ3    | 13.2963989   | 4 | 4  | 4 | 41.5  | 10.59 | 74  | 4 |
| Q9UJX3     | Anaphase-p   | 9.84974958   | 5 | 5  | 5 | 66.8  | 5.64  | 90  | 5 |
| AOA0J9YWLO | Absent in    | 2.53402159   | 5 | 6  | 5 | 231.6 | 5.81  | 47  | 5 |
| POC7P4     | Putative cy  | 28.975265    | 5 | 5  | 2 | 30.8  | 8.87  | 34  | 5 |
| Q86SX6     | Glutaredoxi  | 24.8407643   | 3 | 4  | 3 | 16.6  | 6.79  | 97  | 3 |
| P49207     | 60S ribosom  | 38.4615385   | 8 | 8  | 8 | 13.3  | 11.47 | 105 | 8 |
| Q9NQW7     | Xaa-Pro ami  | 8.8282504    | 5 | 5  | 5 | 69.9  | 5.67  | 105 | 5 |
| Q6NUM9     | All-trans    | 9.50819672   | 5 | 6  | 5 | 66.8  | 8.28  | 67  | 5 |
| Q96KA5     | Cleft lip    | 6.50557621   | 3 | 4  | 3 | 62.2  | 8.56  | 94  | 3 |
| Q13823     | Nucleolar    | 6.56634747   | 4 | 4  | 4 | 83.6  | 9.25  | 67  | 4 |
| B5BU16     | Mitogen-act  | 10.4790419   | 3 | 4  | 3 | 37.4  | 7.06  | 85  | 3 |
| Q9NRR5     | Ubiquilin    | 6.82196339   | 3 | 5  | 1 | 63.8  | 5.22  | 55  | 3 |
| Q9NRW7     | Vacuolar pi  | 9.12280702   | 4 | 4  | 4 | 65    | 8.24  | 117 | 4 |
| Q9UNF1     | Melanoma     | 6.76567657   | 4 | 5  | 4 | 64.9  | 9.32  | 106 | 4 |
| O14617     | AP-3 compl   | 4.59670425   | 4 | 4  | 4 | 130.1 | 8.48  | 88  | 4 |
| B8ZWD9     | Diazepam     | bi20.8333333 | 2 | 3  | 2 | 16.1  | 5.05  | 97  | 2 |
| AOA024R9M9 | Calcium bir  | 33.8461538   | 5 | 5  | 5 | 22.4  | 5.1   | 59  | 5 |
| Q5SW79     | Centrosoma   | 14.35606061  | 5 | 7  | 5 | 175.2 | 7.11  | 95  | 5 |
| Q9HC07     | Transmembr   | 8.64197531   | 2 | 3  | 2 | 34.9  | 7.02  | 49  | 2 |
| B2RD51     | Proteasome   | 13.8888889   | 3 | 3  | 3 | 32.9  | 7.17  | 95  | 3 |
| Q541A5     | Ubiquitin    | 118.8925081  | 5 | 5  | 5 | 34.5  | 6.7   | 75  | 5 |
| Q9H8S9     | MOB kinase   | 20.8333333   | 4 | 5  | 4 | 25.1  | 6.95  | 68  | 4 |
| Q5VT52     | Regulation   | 4.58590007   | 4 | 4  | 4 | 155.9 | 7.42  | 57  | 4 |
| Q8WXA9     | Splicing r   | 10.0393701   | 3 | 3  | 3 | 59.3  | 10.39 | 111 | 3 |
| B2R7D2     | cDNA, FLJ9   | 5.33880903   | 2 | 3  | 2 | 55.1  | 7.97  | 54  | 2 |

|            |              |             |   |   |   |       |       |     |   |
|------------|--------------|-------------|---|---|---|-------|-------|-----|---|
| Q6P6C2     | RNA demethy  | 9.64467005  | 2 | 3 | 2 | 44.2  | 9.09  | 37  | 2 |
| B2RD15     | cDNA, FLJ9   | 8.1232493   | 5 | 5 | 5 | 81.8  | 5.54  | 84  | 5 |
| Q9NRX2     | 39S ribosom  | 9.14285714  | 2 | 3 | 2 | 20    | 10.11 | 90  | 2 |
| A8K5S3     | cDNA FLJ78   | 13.7362637  | 4 | 5 | 4 | 39.7  | 5.35  | 98  | 4 |
| Q06203     | Amidophosp   | 9.09090909  | 4 | 5 | 4 | 57.4  | 6.76  | 40  | 4 |
| P42696     | RNA-binding  | 9.76744186  | 3 | 4 | 3 | 48.5  | 10.11 | 114 | 3 |
| Q92614     | Unconventic  | 2.19084713  | 3 | 3 | 3 | 233   | 6.3   | 83  | 3 |
| AOA024QZY5 | PRP4 pre-mi  | 2.97914598  | 3 | 4 | 3 | 116.9 | 10.26 | 122 | 3 |
| C9IZQ1     | Translocon   | 11.409396   | 3 | 5 | 3 | 33.9  | 4.69  | 127 | 3 |
| O15020     | Spectrin be  | 2.42677824  | 6 | 7 | 1 | 271.2 | 6.11  | 70  | 6 |
| E7EMK3     | Flotillin-1  | 11.5942029  | 4 | 5 | 4 | 53.1  | 5.24  | 55  | 4 |
| Q96ER9     | Coiled-coil  | 14.5985401  | 4 | 4 | 4 | 45.8  | 8.19  | 72  | 4 |
| X6R5Z6     | Cytochrome   | 18.7096774  | 3 | 5 | 3 | 18    | 10.1  | 111 | 3 |
| Q15819     | Ubiquitin-c  | 31.7241379  | 4 | 4 | 2 | 16.4  | 8.09  | 151 | 4 |
| O00541     | Pescadillo   | 10.3741497  | 5 | 5 | 5 | 68    | 7.33  | 50  | 5 |
| Q9UKL0     | REST corepr  | 8.65979381  | 3 | 3 | 3 | 53.3  | 7.03  | 73  | 3 |
| Q59GX2     | Solute carr  | 6.96324952  | 4 | 5 | 4 | 57    | 9.47  | 136 | 4 |
| B2RAH5     | Protein phc  | 2.81553398  | 2 | 2 | 2 | 115.3 | 5.43  | 167 | 2 |
| B2RAL9     | Dual speci   | 12.2395833  | 3 | 4 | 3 | 41.8  | 6.33  | 67  | 3 |
| Q9BVJ6     | U3 small nt  | 7.00389105  | 3 | 3 | 3 | 87.9  | 7.87  | 59  | 3 |
| O95758     | Polypyrimic  | 10.6884058  | 5 | 5 | 3 | 59.7  | 9.04  | 77  | 5 |
| Q5T6F2     | Ubiquitin-ε  | 4.46827525  | 3 | 3 | 3 | 117   | 7.34  | 58  | 3 |
| HOYV8      | 40S ribosom  | 34          | 3 | 6 | 1 | 11.3  | 9.32  | 121 | 3 |
| P05114     | Non-histone  | 27          | 2 | 4 | 2 | 10.7  | 9.6   | 60  | 2 |
| Q96KB5     | Lymphokine   | 21.4285714  | 4 | 4 | 4 | 36.1  | 5.12  | 54  | 4 |
| P13995     | Bifunction   | 12.5714286  | 2 | 3 | 2 | 37.9  | 8.73  | 28  | 2 |
| Q92905     | COP9 signal  | 13.7724551  | 5 | 5 | 5 | 37.6  | 6.54  | 58  | 5 |
| Q5JRX3     | Presequence  | 5.11089682  | 4 | 4 | 4 | 117.3 | 6.92  | 49  | 4 |
| P07203     | Glutathione  | 31.0344828  | 3 | 3 | 3 | 22.1  | 6.55  | 0   | 3 |
| Q9Y3B2     | Exosome con  | 29.7435897  | 4 | 4 | 4 | 21.4  | 8.24  | 61  | 4 |
| Q9BUL8     | Programmed   | 27.8301887  | 4 | 4 | 4 | 24.7  | 8.19  | 71  | 4 |
| O00217     | NADH dehyd   | 17.1428571  | 5 | 5 | 5 | 23.7  | 6.34  | 608 | 5 |
| A8K070     | COP9 signal  | 12.1673004  | 5 | 5 | 5 | 58.9  | 6.32  | 48  | 5 |
| Q8WW12     | PEST protec  | 22.4719101  | 3 | 4 | 3 | 18.9  | 7.49  | 112 | 3 |
| P42677     | 40S ribosom  | 40.4761905  | 3 | 6 | 1 | 9.5   | 9.45  | 143 | 3 |
| Q9Y221     | 60S ribosom  | 28.8888889  | 3 | 3 | 3 | 20.4  | 8.51  | 67  | 3 |
| Q9BV57     | 1,2-dihydr   | 37.4301676  | 5 | 5 | 5 | 21.5  | 5.68  | 48  | 5 |
| Q08170     | Serine/argi  | 9.51417004  | 5 | 5 | 2 | 56.6  | 11.52 | 108 | 5 |
| P55039     | Development  | 11.2637363  | 3 | 4 | 3 | 40.7  | 8.88  | 85  | 3 |
| Q9P032     | NADH dehyd   | 18.8571429  | 3 | 4 | 3 | 20.3  | 8.82  | 89  | 3 |
| P08579     | U2 small nt  | 19.5555556  | 4 | 4 | 2 | 25.5  | 9.72  | 85  | 4 |
| O60783     | 28S ribosom  | 21.875      | 2 | 3 | 2 | 15.1  | 11.41 | 102 | 2 |
| O43929     | Origin recc  | 5.04587156  | 3 | 3 | 3 | 50.3  | 8     | 102 | 3 |
| A8K761     | NADH dehyd   | 29.0697674  | 4 | 4 | 4 | 20.8  | 8.48  | 101 | 4 |
| Q9H2M9     | Rab3 GTPase  | 2.87150036  | 4 | 5 | 4 | 155.9 | 5.62  | 97  | 4 |
| Q15020     | Squamous c   | 3.94600208  | 2 | 4 | 2 | 109.9 | 5.57  | 91  | 2 |
| AOA023T787 | RNA-binding  | 22.4137931  | 4 | 5 | 4 | 19.9  | 5.72  | 96  | 4 |
| AOA087WWM0 | Trafficking  | 28.7234043  | 4 | 5 | 4 | 21.2  | 5.06  | 97  | 4 |
| Q6NUQ4     | Transmembr   | 10.0145138  | 4 | 4 | 4 | 77.1  | 9.14  | 40  | 4 |
| B4DTK7     | cDNA FLJ61   | 4.19651996  | 2 | 4 | 2 | 108.9 | 8.44  | 99  | 2 |
| Q9BR76     | Coronin-1B   | 10.6339468  | 2 | 3 | 2 | 54.2  | 5.88  | 41  | 2 |
| Q15075     | Early endoc  | 3.68532955  | 4 | 4 | 4 | 162.4 | 5.68  | 80  | 4 |
| O60716     | Catenin del  | 5.5785124   | 3 | 3 | 3 | 108.1 | 6.23  | 23  | 3 |
| Q504R6     | RAB13 protec | 17.6229508  | 4 | 5 | 3 | 27.2  | 8.9   | 131 | 4 |
| O15260     | Surfeit loc  | 11.1524164  | 3 | 5 | 3 | 30.4  | 7.78  | 126 | 3 |
| O75663     | TIP41-like   | 11.3970588  | 3 | 4 | 3 | 31.4  | 5.91  | 96  | 3 |
| Q92930     | Ras-relate   | 23.1884058  | 4 | 7 | 2 | 23.6  | 9.07  | 198 | 4 |
| O15427     | Monocarboxy  | 12.0430108  | 4 | 5 | 4 | 49.4  | 7.96  | 71  | 4 |
| P11233     | Ras-relate   | 17.961165   | 3 | 3 | 1 | 23.6  | 7.11  | 97  | 3 |
| Q15054     | DNA polymer  | 6.00858369  | 2 | 3 | 2 | 51.4  | 9.35  | 113 | 2 |
| AOA024ROH2 | Mitochondri  | 33.3333333  | 3 | 4 | 3 | 15.2  | 10.29 | 0   | 3 |
| Q5F1R6     | DnaJ homol   | 6.21468927  | 3 | 3 | 3 | 62    | 5.47  | 93  | 3 |
| Q9Y4W2     | Ribosomal    | 18.85558583 | 5 | 5 | 5 | 83    | 4.73  | 52  | 5 |
| G1AUC5     | Protein phc  | 18.0487805  | 3 | 3 | 3 | 23.1  | 4.87  | 157 | 3 |
| AOA140VJL8 | Testicular   | 16.3690476  | 4 | 4 | 4 | 36.7  | 7.91  | 63  | 4 |
| O95298     | NADH dehyd   | 26.0504202  | 4 | 5 | 4 | 14.2  | 8.98  | 48  | 4 |
| E7EQZ4     | Survival mc  | 15.3061224  | 3 | 4 | 3 | 31.7  | 5.71  | 69  | 3 |
| Q16513     | Serine/thre  | 5.28455285  | 4 | 4 | 4 | 112   | 6.3   | 57  | 4 |
| E9PR30     | 40S ribosom  | 12.244898   | 4 | 8 | 4 | 10.9  | 11.56 | 105 | 4 |
| Q5JSH3     | WD repeat-c  | 7.55750274  | 4 | 4 | 4 | 101.3 | 5.45  | 94  | 4 |
| B2R9X3     | cDNA, FLJ9   | 12.9032258  | 4 | 4 | 4 | 41.8  | 7.12  | 80  | 4 |
| P09496     | Clathrin li  | 17.7419355  | 6 | 6 | 6 | 27.1  | 4.51  | 148 | 6 |
| Q9NX40     | OClA domair  | 16.7346939  | 3 | 5 | 3 | 27.6  | 7.49  | 133 | 3 |

|            |               |             |   |    |   |       |       |     |   |
|------------|---------------|-------------|---|----|---|-------|-------|-----|---|
| Q96BN8     | Ubiquitin     | 115.3409091 | 3 | 6  | 3 | 40.2  | 5.47  | 50  | 3 |
| P09110     | 3-ketoacyl-   | 15.0943396  | 4 | 4  | 4 | 44.3  | 8.44  | 102 | 4 |
| A8K410     | cDNA FLJ7829. | 27419355    | 3 | 3  | 3 | 54.6  | 5.08  | 72  | 3 |
| P41223     | Protein BUI   | 34.0277778  | 4 | 4  | 4 | 17    | 8.82  | 62  | 4 |
| Q96GG9     | DCN1-like     | 16.2162162  | 3 | 4  | 3 | 30.1  | 5.34  | 146 | 3 |
| AOA0S2Z5L1 | ATP-binding   | 6.77009873  | 3 | 3  | 3 | 79.7  | 6.34  | 85  | 3 |
| Q05CP8     | CCDC6 prot    | 10.7784431  | 3 | 3  | 2 | 38.1  | 9.39  | 117 | 3 |
| D3DU92     | RNA binding   | 14.0983607  | 3 | 4  | 3 | 34.2  | 11.84 | 91  | 3 |
| P47985     | Cytochrome    | 27.0072993  | 4 | 4  | 1 | 29.6  | 8.32  | 41  | 4 |
| Q13065     | G antigen     | 131.6546763 | 2 | 7  | 2 | 15.6  | 4.44  | 40  | 2 |
| Q9BRA2     | Thioredoxin   | 30.0813008  | 3 | 4  | 3 | 13.9  | 5.52  | 128 | 3 |
| Q9UKN8     | General tra   | 7.42092457  | 5 | 5  | 5 | 91.9  | 6.65  | 38  | 5 |
| P21281     | V-type prot   | 9.00195695  | 3 | 3  | 3 | 56.5  | 5.81  | 80  | 3 |
| P11047     | Laminin su    | 2.98321939  | 3 | 3  | 3 | 177.5 | 5.12  | 120 | 3 |
| O43920     | NADH dehyd    | 36.7924528  | 3 | 3  | 3 | 12.5  | 9.14  | 72  | 3 |
| Q96RN5     | Mediator of   | 3.8071066   | 2 | 3  | 2 | 86.7  | 9.42  | 75  | 2 |
| Q13951     | Core-bindin   | 19.7802198  | 3 | 3  | 3 | 21.5  | 6.6   | 101 | 3 |
| Q96QR8     | Transcripti   | 15.3846154  | 3 | 3  | 2 | 33.2  | 5.43  | 57  | 3 |
| AOA024R571 | EH domain-    | 12.4087591  | 3 | 4  | 3 | 61.9  | 6.71  | 0   | 3 |
| K7ELG9     | Protein LSM   | 4.7826087   | 2 | 4  | 2 | 24.9  | 7.42  | 149 | 2 |
| B3KVV6     | cDNA FLJ435   | 5.57768924  | 6 | 6  | 4 | 145.4 | 7.61  | 78  | 6 |
| B7ZLW0     | LPP protei    | 6.20915033  | 2 | 3  | 2 | 65.7  | 7.37  | 0   | 2 |
| B2R680     | Signal tra    | 6.02125148  | 5 | 5  | 5 | 94.1  | 6.23  | 50  | 5 |
| B2R739     | cDNA, FLJ91   | 14.8648649  | 4 | 4  | 4 | 33.4  | 10.01 | 63  | 4 |
| Q15650     | Activating    | 8.60585198  | 3 | 3  | 3 | 66.1  | 7.85  | 42  | 3 |
| O43795     | Unconventi    | 4.75352113  | 4 | 4  | 4 | 131.9 | 9.38  | 48  | 4 |
| Q8TBB5     | Kelch domai   | 8.65384615  | 3 | 3  | 3 | 57.9  | 5.72  | 49  | 3 |
| Q8NFB9     | MLL/SEPTIN    | 10.3756708  | 4 | 5  | 2 | 63.1  | 8.02  | 60  | 4 |
| Q9GZY8     | Mitochondri   | 20.7602339  | 4 | 5  | 4 | 38.4  | 8.95  | 0   | 4 |
| Q9NPE3     | H/ACA ribo    | 59.375      | 3 | 4  | 3 | 7.7   | 9.99  | 134 | 3 |
| HOY886     | NADH dehyd    | 10.6796117  | 2 | 3  | 2 | 23.5  | 9.6   | 96  | 2 |
| P57678     | Gem-associ    | 3.68620038  | 3 | 3  | 3 | 120   | 6.04  | 99  | 3 |
| P27144     | Adenylate     | 122.8699552 | 4 | 4  | 4 | 25.3  | 8.4   | 51  | 4 |
| F6S8M0     | N-acetylgl    | 10.4452055  | 4 | 4  | 4 | 65.7  | 7.97  | 107 | 4 |
| Q7Z4Q2     | HEAT repeat   | 5.44117647  | 3 | 3  | 3 | 74.5  | 5.11  | 113 | 3 |
| B4E1J8     | cDNA FLJ561   | 30.2521008  | 5 | 5  | 5 | 27.2  | 9.66  | 47  | 5 |
| P18615     | Negative e    | 11.8421053  | 3 | 3  | 3 | 43.2  | 9.33  | 61  | 3 |
| Q9UPN9     | E3 ubiquiti   | 4.43655723  | 4 | 4  | 4 | 122.5 | 6.67  | 59  | 4 |
| A8ASI8     | BH3 interac   | 28.7179487  | 3 | 3  | 3 | 22    | 5.44  | 64  | 3 |
| Q8IWA0     | WD repeat-    | 5.18072289  | 4 | 4  | 4 | 94.4  | 5.96  | 113 | 4 |
| Q9BW92     | Threonine--   | 4.45682451  | 3 | 3  | 3 | 81    | 7.3   | 100 | 3 |
| Q13405     | 39S riboso    | 16.2650602  | 2 | 2  | 2 | 19.2  | 9.45  | 93  | 2 |
| Q04206     | Transcripti   | 9.43738657  | 4 | 7  | 4 | 60.2  | 5.68  | 41  | 4 |
| E5KS60     | Succinate--   | 13.3909287  | 4 | 4  | 4 | 50.3  | 7.42  | 62  | 4 |
| V9HW45     | Epididymis    | 17.2413793  | 3 | 3  | 3 | 30    | 7.06  | 37  | 3 |
| Q9NUI1     | Peroxisomal   | 16.0958904  | 3 | 3  | 3 | 30.8  | 9.22  | 82  | 3 |
| Q9Y5P6     | Mannose-1-    | 10.8333333  | 3 | 4  | 3 | 39.8  | 6.61  | 73  | 3 |
| Q8NBJ4     | Golgi mem     | 8.47880299  | 3 | 4  | 3 | 45.3  | 4.97  | 79  | 3 |
| Q9UNN5     | FAS-associ    | 8.76923077  | 5 | 5  | 5 | 73.9  | 4.88  | 79  | 5 |
| Q8N4Q1     | Mitochondri   | 33.0985915  | 2 | 2  | 2 | 16    | 4.31  | 55  | 2 |
| Q8TCD0     | Uncharacter   | 7.53138075  | 1 | 10 | 1 | 26.2  | 8.06  | 244 | 1 |
| P51970     | NADH dehyd    | 22.6744186  | 3 | 4  | 3 | 20.1  | 7.65  | 66  | 3 |
| P51116     | Fragile X     | 11.1441308  | 5 | 7  | 3 | 74.2  | 6.23  | 42  | 5 |
| Q9H488     | GDP-fucose    | 13.1443299  | 3 | 3  | 3 | 43.9  | 8.53  | 65  | 3 |
| Q96B26     | Exosome con   | 21.3768116  | 3 | 3  | 3 | 30    | 5.3   | 76  | 3 |
| D7RF68     | AGTRAP-BRA    | 3.68509213  | 1 | 2  | 1 | 66.2  | 8.9   | 56  | 1 |
| Q6LAP8     | Mitochondri   | 11.0062893  | 3 | 3  | 3 | 34.8  | 9.89  | 104 | 3 |
| O75348     | V-type prot   | 21.1864407  | 3 | 3  | 3 | 13.7  | 8.79  | 85  | 3 |
| P13928     | Annexin A8    | 16.2079511  | 4 | 4  | 4 | 36.9  | 5.78  | 61  | 4 |
| Q96BR5     | Cytochrome    | 12.987013   | 2 | 3  | 2 | 25.7  | 6.02  | 111 | 2 |
| P18077     | 60S riboso    | 23.6363636  | 4 | 5  | 4 | 12.5  | 11.06 | 94  | 4 |
| AOA024R5S9 | Neural cell   | 15.88888889 | 5 | 5  | 5 | 104.1 | 5.92  | 36  | 5 |
| Q9UBC2     | Epidermal     | 5.78703704  | 3 | 3  | 3 | 94.2  | 5.11  | 60  | 3 |
| Q14739     | Lamin-B rec   | 4.3902439   | 2 | 3  | 2 | 70.7  | 9.36  | 100 | 2 |
| Q9UNP9     | Peptidyl-p    | 24.9169435  | 5 | 5  | 4 | 33.4  | 5.6   | 52  | 5 |
| Q92481     | Transcripti   | 6.30434783  | 2 | 2  | 2 | 50.4  | 8.24  | 100 | 2 |
| P20645     | Cation-dep    | 12.6353791  | 3 | 3  | 3 | 31    | 5.83  | 102 | 3 |
| AOA0AOMQR2 | Protein RTF   | 8.63095238  | 2 | 3  | 2 | 37.5  | 8.44  | 67  | 2 |
| Q7Z4H3     | HD domain-    | 18.627451   | 3 | 4  | 3 | 23.4  | 5.49  | 88  | 3 |
| P54105     | Methylsom     | 10.5485232  | 2 | 3  | 2 | 26.2  | 4.11  | 122 | 2 |
| P55081     | Microfibril   | 6.83371298  | 3 | 3  | 3 | 51.9  | 4.98  | 41  | 3 |
| MOQXB5     | Persulfide    | 20.7692308  | 4 | 4  | 4 | 28.4  | 6.52  | 52  | 4 |
| Q9Y263     | Phospholip    | 8.93081761  | 4 | 4  | 4 | 87.1  | 6.37  | 59  | 4 |



|            |             |              |   |   |   |       |       |     |   |
|------------|-------------|--------------|---|---|---|-------|-------|-----|---|
| AOA024R806 | Uncharacter | 31.147541    | 3 | 3 | 3 | 13.1  | 7.88  | 110 | 3 |
| Q32Q14     | NDUFA7 prot | 14.8760331   | 1 | 2 | 1 | 13.5  | 10.4  | 106 | 1 |
| O95602     | DNA-directe | 2.79069767   | 4 | 4 | 4 | 194.7 | 7.03  | 29  | 4 |
| D3DUP1     | WNK lysine  | 1.67926113   | 3 | 3 | 3 | 250.6 | 6.34  | 59  | 3 |
| Q6P3X3     | Tetratricof | 5.33807829   | 3 | 3 | 3 | 96.6  | 5.59  | 50  | 3 |
| P22059     | Oxysterol-t | 5.20446097   | 4 | 4 | 4 | 89.4  | 7.3   | 43  | 4 |
| Q9NY12     | H/ACA ribor | 17.5115207   | 4 | 4 | 4 | 22.3  | 10.92 | 44  | 4 |
| B1AKR6     | Dynein lig  | 22.2972973   | 2 | 2 | 2 | 16.2  | 7.02  | 69  | 2 |
| B2R8N1     | cDNA, FLJ9  | 17.2248804   | 2 | 3 | 2 | 23.2  | 5.38  | 96  | 2 |
| Q14165     | Malectin O  | 14.0410959   | 3 | 3 | 3 | 32.2  | 5.41  | 69  | 3 |
| Q9UIJ7     | GTP:AMP ph  | 17.1806167   | 3 | 4 | 3 | 25.6  | 9.16  | 66  | 3 |
| O75312     | Zinc finger | 8.06100218   | 3 | 3 | 3 | 50.9  | 4.73  | 109 | 3 |
| P82673     | 28S riboso  | 15.4798762   | 3 | 3 | 3 | 36.8  | 8.24  | 43  | 3 |
| O75880     | Protein SC  | 11.9601329   | 2 | 3 | 2 | 33.8  | 8.88  | 57  | 2 |
| Q7Z4W1     | L-xylulose  | 12.704918    | 3 | 3 | 3 | 25.9  | 8.1   | 102 | 3 |
| AOA024R3A2 | DCN1-like   | 19.4092827   | 4 | 4 | 4 | 27.5  | 5.58  | 117 | 4 |
| C9J7E5     | Transportir | 6.5830721    | 5 | 5 | 5 | 108   | 5.71  | 59  | 5 |
| Q969Q0     | 60S riboso  | 39.6226415   | 5 | 7 | 1 | 12.5  | 10.65 | 76  | 5 |
| Q96K76     | Ubiquitin   | 3.70909091   | 4 | 4 | 4 | 157.2 | 5.08  | 79  | 4 |
| Q96JM3     | Chromosome  | 5.78817734   | 4 | 5 | 4 | 89    | 8.44  | 56  | 4 |
| E7EPT4     | NADH dehyd  | 15.8730159   | 3 | 4 | 3 | 27.9  | 8     | 41  | 3 |
| Q15654     | Thyroid rec | 12.394958    | 4 | 4 | 4 | 50.3  | 7.37  | 33  | 4 |
| O14548     | Cytochrome  | 49.122807    | 3 | 3 | 3 | 12.6  | 9.42  | 107 | 3 |
| Q8IY71     | MRPS17 prot | 26.7605634   | 2 | 2 | 2 | 15.7  | 9.85  | 68  | 2 |
| Q13158     | FAS-assoc   | 8.65384615   | 1 | 2 | 1 | 23.3  | 5.69  | 127 | 1 |
| Q9UHY7     | Enolase-ph  | 12.6436782   | 2 | 3 | 2 | 28.9  | 4.78  | 42  | 2 |
| B2RBP3     | cDNA, FLJ9  | 13.174946    | 3 | 3 | 3 | 51.8  | 5.45  | 42  | 3 |
| P10606     | Cytochrome  | 35.6589147   | 5 | 8 | 5 | 13.7  | 8.81  | 77  | 5 |
| X6RAL5     | Histone de  | 16.8604651   | 2 | 3 | 2 | 19.5  | 9.8   | 103 | 2 |
| Q9NT15     | Sister chr  | 2.90255701   | 4 | 4 | 3 | 164.6 | 8.47  | 99  | 4 |
| B2R5R5     | cDNA, FLJ9  | 8.28571429   | 2 | 2 | 2 | 39.3  | 5.53  | 47  | 2 |
| AOA0U1RQMO | Uncharacter | 27.5862069   | 2 | 2 | 2 | 12.7  | 10.24 | 89  | 2 |
| Q6XQN6     | Nicotinate  | 7.62081784   | 3 | 3 | 3 | 57.5  | 5.68  | 67  | 3 |
| B2RAWO     | cDNA, FLJ9  | 9.48051948   | 5 | 5 | 5 | 82.4  | 5.53  | 39  | 5 |
| Q00403     | Transcript  | 11.3924051   | 2 | 2 | 2 | 34.8  | 8.35  | 67  | 2 |
| Q55QP8     | C-terminal  | -9.74658869  | 4 | 4 | 2 | 56.1  | 6.96  | 28  | 4 |
| Q9Y4Y9     | U6 snRNA-a  | 20.8791209   | 1 | 3 | 1 | 9.9   | 4.54  | 64  | 1 |
| P28065     | Proteasome  | 18.7214612   | 4 | 4 | 4 | 23.3  | 5.03  | 96  | 4 |
| Q5TFE4     | 5'-nucleot  | 10.1098901   | 5 | 5 | 5 | 51.8  | 6.35  | 97  | 5 |
| Q9BYT8     | Neurolysin  | ,8.52272727  | 4 | 4 | 4 | 80.6  | 6.64  | 91  | 4 |
| B2R713     | cDNA, FLJ9  | 3.27421555   | 2 | 3 | 2 | 81.7  | 7.97  | 107 | 2 |
| Q14116     | Interleukir | 23.3160622   | 4 | 4 | 4 | 22.3  | 4.67  | 74  | 4 |
| P49458     | Signal rec  | 34.8837209   | 3 | 4 | 3 | 10.1  | 7.97  | 126 | 3 |
| K7ERV3     | Thymidine   | 120.5992509  | 3 | 5 | 3 | 28.6  | 8.56  | 78  | 3 |
| Q14692     | Ribosome b  | 2.80811232   | 3 | 3 | 3 | 145.7 | 6.44  | 71  | 3 |
| P62745     | Rho-relate  | 20.9183673   | 3 | 4 | 1 | 22.1  | 5.24  | 122 | 3 |
| B2R823     | cDNA, FLJ9  | 16.2698413   | 3 | 3 | 3 | 27.9  | 9.73  | 38  | 3 |
| AOA0S2Z5E9 | CWF19-like  | 3.90334572   | 2 | 3 | 2 | 60.6  | 7.24  | 97  | 2 |
| Q9NZT2     | Opioid gro  | 6.64697194   | 3 | 3 | 3 | 73.3  | 4.84  | 68  | 3 |
| AOA0J9YXF2 | Paraoxonase | 14.4         | 4 | 4 | 4 | 41.5  | 5.72  | 58  | 4 |
| Q8N4V1     | Membrane m  | 34.351145    | 2 | 2 | 2 | 14.7  | 9.16  | 77  | 2 |
| Q8WW59     | SPRY domai  | 23.1884058   | 4 | 4 | 4 | 23.1  | 6.93  | 41  | 4 |
| Q96T51     | RUN and FY  | 7.62711864   | 3 | 3 | 3 | 79.8  | 5.74  | 42  | 3 |
| A8K5W7     | cDNA FLJ7   | 514.89361702 | 4 | 4 | 4 | 105.9 | 6.42  | 56  | 4 |
| E9KL30     | Proteasome  | 30.3249097   | 6 | 6 | 6 | 29.9  | 7.68  | 64  | 6 |
| Q68CZ2     | Tensin-3 O  | 3.25259516   | 3 | 3 | 3 | 155.2 | 6.81  | 50  | 3 |
| Q9BRJ6     | Uncharacter | 24.2268041   | 3 | 4 | 3 | 22.1  | 9.64  | 104 | 3 |
| Q9BTC0     | Death-induc | 2.05357143   | 4 | 4 | 4 | 243.7 | 7.88  | 95  | 4 |
| K7EIK7     | Echinoderm  | 6.4683053    | 4 | 4 | 4 | 84.7  | 6.87  | 46  | 4 |
| Q9Y3C8     | Ubiquitin-f | 113.1736527  | 2 | 3 | 2 | 19.4  | 7.4   | 52  | 2 |
| P62072     | Mitochondri | 23.3333333   | 2 | 3 | 2 | 10.3  | 6.29  | 83  | 2 |
| O75223     | Gamma-glut  | 28.7234043   | 4 | 4 | 4 | 21    | 5.14  | 106 | 4 |
| P43003     | Excitatory  | 5.90405904   | 2 | 3 | 2 | 59.5  | 8.41  | 83  | 2 |
| Q92575     | UBX domain  | -10.0393701  | 3 | 4 | 3 | 56.7  | 6.38  | 61  | 3 |
| O95453     | Poly(A)-spe | 7.19874804   | 3 | 3 | 3 | 73.4  | 6.2   | 62  | 3 |
| B2RAR2     | cDNA, FLJ9  | 12.3786408   | 4 | 5 | 4 | 46.6  | 7.18  | 37  | 4 |
| B2RB52     | cDNA, FLJ9  | 7.38255034   | 3 | 3 | 3 | 49.8  | 9.44  | 87  | 3 |
| AOA0AOMTH3 | Integrin-li | 9.10973085   | 4 | 4 | 4 | 54.6  | 7.97  | 46  | 4 |
| O14949     | Cytochrome  | 45.1219512   | 4 | 5 | 4 | 9.9   | 10.08 | 74  | 4 |
| AOA024QYXO | Emopamil b  | 12.173913    | 2 | 5 | 2 | 26.3  | 7.9   | 93  | 2 |
| B3KNC3     | cDNA FLJ1   | 46.14152203  | 4 | 4 | 4 | 84.9  | 5.62  | 75  | 4 |
| MOQZR4     | Rho guanin  | 4.8553719    | 3 | 3 | 3 | 108.3 | 6.15  | 44  | 3 |
| P62877     | E3 ubiquiti | 29.6296296   | 3 | 3 | 3 | 12.3  | 6.96  | 66  | 3 |

|            |                      |             |   |   |   |       |       |     |   |
|------------|----------------------|-------------|---|---|---|-------|-------|-----|---|
| A0A0G2JK23 | Large proli          | 3.26855124  | 3 | 3 | 3 | 119.3 | 5.6   | 44  | 3 |
| A5YKK6     | CCR4-NOT t1          | 4.47306397  | 3 | 3 | 3 | 266.8 | 7.11  | 55  | 3 |
| HOYNJ6     | GMP reduct           | 9.13348946  | 3 | 3 | 3 | 46.9  | 8.51  | 91  | 3 |
| B7ZKQ8     | PODXL prote          | 5.17857143  | 3 | 5 | 3 | 58.8  | 5.49  | 94  | 3 |
| DOEKE5     | Peptidylpr           | 11.2759644  | 3 | 3 | 3 | 38.5  | 6.84  | 69  | 3 |
| Q5TDH0     | Protein DD           | 19.52380952 | 3 | 3 | 3 | 44.5  | 5.05  | 80  | 3 |
| Q5T765     | Interferon           | -6.12244898 | 2 | 2 | 2 | 56    | 5.2   | 70  | 2 |
| Q14126     | Desmoglein           | -4.38282648 | 3 | 3 | 3 | 122.2 | 5.24  | 85  | 3 |
| P37235     | Hippocalcir          | 15.5440415  | 3 | 4 | 3 | 22.3  | 5.35  | 85  | 3 |
| Q9H9A6     | Leucine-ric          | 5.31561462  | 2 | 2 | 2 | 68.2  | 6.43  | 66  | 2 |
| HOYGM0     | Caseinolyti          | 7.30337079  | 4 | 4 | 4 | 80.1  | 8.85  | 44  | 4 |
| Q6ZRP7     | Sulfhydryl           | 7.02005731  | 4 | 5 | 4 | 77.5  | 7.72  | 65  | 4 |
| Q96GC5     | 39S ribosom          | 16.9811321  | 3 | 3 | 3 | 23.9  | 8.98  | 85  | 3 |
| Q9H8Y8     | Golgi reas           | 12.6106195  | 3 | 3 | 3 | 47.1  | 4.82  | 93  | 3 |
| O00625     | Pirin OS=H           | 24.4827586  | 4 | 4 | 4 | 32.1  | 6.92  | 31  | 4 |
| A6XMV9     | Protease sc          | 7.66283525  | 1 | 2 | 1 | 28    | 5.14  | 60  | 1 |
| Q13643     | Four and a           | 16.7857143  | 3 | 3 | 3 | 31.2  | 6.2   | 46  | 3 |
| Q9NX47     | E3 ubiquiti          | 9.71223022  | 2 | 2 | 2 | 31.2  | 8.7   | 91  | 2 |
| Q96IJ6     | Mannose-1- $\pi$     | 13.8095238  | 4 | 4 | 4 | 46.3  | 7.21  | 51  | 4 |
| P33897     | ATP-binding          | 6.84563758  | 3 | 3 | 3 | 82.9  | 8.95  | 77  | 3 |
| Q9UNI6     | Dual specii          | 12.3529412  | 3 | 3 | 3 | 37.7  | 6.84  | 60  | 3 |
| Q13427     | Peptidyl-p           | 6.49867374  | 4 | 4 | 4 | 88.6  | 10.29 | 51  | 4 |
| Q5JWF2     | Guanine nuc          | 4.72516876  | 4 | 4 | 3 | 111   | 5.03  | 51  | 4 |
| A0A0S2Z5U3 | Heterogene           | 8.55148342  | 4 | 4 | 3 | 63.6  | 7.3   | 80  | 4 |
| O00479     | High mobil           | 16.6666667  | 1 | 5 | 1 | 9.5   | 10.48 | 46  | 1 |
| Q9P265     | Disco-inter          | 3.29949239  | 3 | 3 | 3 | 171.4 | 8.09  | 53  | 3 |
| Q9H501     | ESF1 homol           | 5.75793184  | 4 | 5 | 4 | 98.7  | 5.11  | 40  | 4 |
| O75165     | DnaJ homol           | 4.8724922   | 3 | 4 | 3 | 254.3 | 6.74  | 83  | 3 |
| A2A2Q9     | Protein AAF          | 7.78894472  | 2 | 2 | 2 | 45    | 7.46  | 104 | 2 |
| Q9NNW7     | Thioredoxir          | 5.53435115  | 2 | 2 | 1 | 56.5  | 7.5   | 75  | 2 |
| Q9BQ39     | ATP-depend           | 5.02035278  | 2 | 3 | 1 | 82.5  | 9.17  | 127 | 2 |
| A0A087WUC6 | Signal pept          | 18.5022026  | 5 | 6 | 5 | 25.1  | 8.47  | 67  | 5 |
| Q6FIC5     | Chloride ir          | 15.0197628  | 2 | 2 | 2 | 28.8  | 5.59  | 73  | 2 |
| O00483     | Cytochrome           | 46.9135802  | 4 | 5 | 4 | 9.4   | 9.38  | 56  | 4 |
| P30837     | Aldehyde de          | 7.73694391  | 2 | 3 | 2 | 57.2  | 6.8   | 74  | 2 |
| P51553     | Isocitrate           | 11.9592875  | 4 | 4 | 4 | 42.8  | 8.5   | 51  | 4 |
| Q9Y223     | Bifunction           | 4.84764543  | 2 | 2 | 2 | 79.2  | 6.8   | 84  | 2 |
| Q96QD8     | Sodium-cou           | 6.71936759  | 3 | 4 | 3 | 56    | 8     | 41  | 3 |
| Q86X76     | Nitrilase            | 13.1498471  | 4 | 4 | 4 | 35.9  | 7.74  | 90  | 4 |
| A0A068F7M9 | FH1/FH2 don          | 3.44537815  | 4 | 4 | 4 | 129.2 | 6.37  | 54  | 4 |
| Q8N5K1     | CDGSH iron           | -25.9259259 | 3 | 3 | 3 | 15.3  | 9.61  | 101 | 3 |
| Q59H39     | Signal trar          | 5.45685279  | 4 | 4 | 4 | 89.9  | 6.2   | 73  | 4 |
| Q59HG1     | Chromosome           | -2.99595142 | 4 | 4 | 4 | 140.3 | 6.27  | 104 | 4 |
| Q5T8P6     | RNA-binding          | 3.57497517  | 3 | 3 | 3 | 113.5 | 9.16  | 62  | 3 |
| Q969G3     | SWI/SNF-rel          | 6.81265207  | 2 | 2 | 2 | 46.6  | 4.88  | 102 | 2 |
| A0A024RAF7 | Endothelin           | 6.23376623  | 4 | 4 | 4 | 87.1  | 5.88  | 54  | 4 |
| Q6MZP3     | Putative ur          | 2.91798107  | 3 | 3 | 3 | 145.6 | 5.52  | 61  | 3 |
| HOYJ66     | Dehydrogen           | 5.51378446  | 2 | 2 | 2 | 44.8  | 9.03  | 45  | 2 |
| HOYL70     | Transducin           | -9.20716113 | 4 | 4 | 4 | 84.4  | 7.27  | 29  | 4 |
| P10253     | Lysosomal $\epsilon$ | 3.99159664  | 3 | 3 | 3 | 105.3 | 6     | 53  | 3 |
| O15121     | Sphingolipi          | 5.57275542  | 1 | 2 | 1 | 37.8  | 7.46  | 0   | 1 |
| Q16831     | Uridine ph           | 11.9354839  | 3 | 3 | 3 | 33.9  | 7.88  | 48  | 3 |
| E9PN81     | Ribonuclea           | 15.7894737  | 2 | 2 | 2 | 26.3  | 6.37  | 80  | 2 |
| Q96J01     | THO comple           | 13.1054131  | 3 | 3 | 3 | 38.7  | 6.09  | 52  | 3 |
| P63218     | Guanine nuc          | 55.8823529  | 3 | 5 | 3 | 7.3   | 9.85  | 51  | 3 |
| O75381     | Peroxisoma           | 19.81432361 | 2 | 2 | 2 | 41.2  | 4.94  | 57  | 2 |
| Q9Y5L4     | Mitochondri          | 27.3684211  | 3 | 3 | 3 | 10.5  | 8.18  | 58  | 3 |
| P56199     | Integrin al          | 3.30788804  | 3 | 3 | 3 | 130.8 | 6.29  | 75  | 3 |
| P23497     | Nuclear aut          | 3.9817975   | 4 | 6 | 2 | 100.4 | 8.22  | 106 | 4 |
| A0A024RB62 | tRNA (guani          | 4.9833887   | 1 | 2 | 1 | 34.1  | 7.9   | 142 | 1 |
| A8K5D4     | Myelin prot          | 9.2936803   | 2 | 3 | 2 | 29.1  | 8.72  | 67  | 2 |
| P11234     | Ras-relate           | 15.5339806  | 3 | 3 | 1 | 23.4  | 6.62  | 76  | 3 |
| Q9NR09     | Baculoviral          | 1.17356393  | 4 | 4 | 4 | 529.9 | 6.05  | 61  | 4 |
| A0A087WWE2 | DNA-direct           | 1.76767677  | 3 | 3 | 3 | 218.1 | 7.85  | 71  | 3 |
| P06730     | Eukaryotic           | 32.2580645  | 5 | 7 | 5 | 25.1  | 6.15  | 42  | 5 |
| Q96BW9     | Phosphatid           | 10.1769912  | 2 | 2 | 2 | 51    | 7.94  | 44  | 2 |
| A0A024RD11 | Protein ph           | 7.64119601  | 4 | 4 | 4 | 69.9  | 8.13  | 42  | 4 |
| H3BMF4     | Protein spi          | 5.41012216  | 2 | 3 | 2 | 61.1  | 7.84  | 71  | 2 |
| P30626     | Sorcin OS=f          | 19.1919192  | 3 | 3 | 3 | 21.7  | 5.59  | 52  | 3 |
| Q9BSC4     | Nucleolar p          | 6.97674419  | 3 | 3 | 3 | 80.3  | 8.46  | 18  | 3 |
| Q5SRQ6     | Casein kin           | 21.7948718  | 4 | 5 | 4 | 26.9  | 5.96  | 46  | 4 |
| Q8WUK0     | Phosphatid           | 12.4378109  | 2 | 2 | 2 | 22.8  | 9.77  | 87  | 2 |
| Q53G19     | Mitochondri          | 25          | 4 | 4 | 4 | 20.6  | 9.91  | 36  | 4 |

|            |              |              |   |   |   |       |       |     |   |
|------------|--------------|--------------|---|---|---|-------|-------|-----|---|
| AOA024R371 | PRA1 family  | 24.4680851   | 4 | 4 | 4 | 21.6  | 9.77  | 70  | 4 |
| Q13404     | Ubiquitin-c  | 18.3673469   | 3 | 3 | 1 | 16.5  | 7.93  | 126 | 3 |
| Q7Z4X2     | Neuronal p21 | 5.189873     | 2 | 2 | 2 | 17.9  | 5.43  | 49  | 2 |
| S4R369     | 39S ribosom  | 10.9730849   | 3 | 3 | 3 | 54.9  | 9.42  | 48  | 3 |
| Q9NR50     | Translatior  | 15.0442478   | 4 | 4 | 4 | 50.2  | 6.47  | 52  | 4 |
| B2RDZ9     | cDNA, FLJ9   | 12.371134    | 2 | 2 | 2 | 31.9  | 5.27  | 47  | 2 |
| Q6FIE5     | PHP14 prote  | 20.8         | 2 | 2 | 2 | 13.8  | 6.07  | 56  | 2 |
| Q8NCA5     | Protein FA   | 2.89017341   | 2 | 2 | 2 | 55.4  | 9.03  | 86  | 2 |
| Q6NX51     | Exocyst con  | 3.79876797   | 3 | 3 | 3 | 110.4 | 6.49  | 76  | 3 |
| Q3KQU3     | MAP7 domai   | 2.97265161   | 3 | 3 | 1 | 92.8  | 10.11 | 71  | 3 |
| Q9Y2W2     | WW domain    | -16.08424337 | 3 | 5 | 3 | 70    | 8.38  | 84  | 3 |
| Q8NC56     | LEM domain   | -7.95228628  | 3 | 3 | 3 | 56.9  | 9     | 74  | 3 |
| Q13616     | Cullin-1 O   | 6.18556701   | 3 | 4 | 3 | 89.6  | 8     | 45  | 3 |
| Q14155     | Rho guaninc  | 5.47945205   | 2 | 2 | 2 | 90    | 7.09  | 0   | 2 |
| A8K7F7     | cDNA FLJ7    | 69.00383142  | 3 | 3 | 3 | 58.5  | 6.55  | 49  | 3 |
| P29083     | General tra  | 7.06150342   | 2 | 2 | 2 | 49.4  | 4.82  | 54  | 2 |
| Q5GLZ8     | Probable E   | 4.63576159   | 3 | 3 | 3 | 118.5 | 6.19  | 37  | 3 |
| AOA146IHPO | SUN domain   | -5.29279279  | 3 | 3 | 3 | 98.7  | 7.39  | 40  | 3 |
| Q9Y639     | Neuroplast   | 11.3065327   | 3 | 4 | 3 | 44.4  | 7.99  | 50  | 3 |
| O60493     | Sorting ne   | 27.7777778   | 4 | 5 | 3 | 18.8  | 8.66  | 74  | 4 |
| AOA0S2Z5M1 | SEC63-like   | 5            | 3 | 3 | 3 | 87.9  | 5.31  | 34  | 3 |
| Q9Y2S0     | DNA-direct   | 24.0601504   | 2 | 2 | 2 | 15.2  | 5.8   | 55  | 2 |
| Q7OUQO     | Inhibitor    | 9.71428571   | 3 | 3 | 3 | 39.3  | 9.17  | 80  | 3 |
| Q658N3     | Down-regul   | 15.3409091   | 2 | 2 | 2 | 19.4  | 4.75  | 75  | 2 |
| J3KQN4     | 60S ribosom  | 29.5774648   | 5 | 6 | 1 | 16.4  | 10.43 | 42  | 5 |
| Q96M27     | Protein PR   | 8.08988764   | 3 | 3 | 3 | 46.7  | 5.83  | 81  | 3 |
| Q9BTT6     | Leucine-ric  | 6.87022901   | 3 | 3 | 1 | 59.2  | 5.02  | 100 | 3 |
| O77960     | HLA-B*40 p   | 17.2222222   | 2 | 5 | 1 | 21.1  | 6.57  | 128 | 2 |
| AOA087X2H1 | E3 ubiquiti  | 2.10405509   | 3 | 4 | 3 | 289.5 | 5.43  | 22  | 3 |
| AOA0S2Z6V5 | EF-hand don  | 3.91705069   | 1 | 1 | 1 | 49.6  | 9.09  | 114 | 1 |
| Q96T76     | MMS19 nucl   | 3.59223301   | 2 | 2 | 2 | 113.2 | 6.35  | 41  | 2 |
| Q9NQ88     | Fructose-2,  | 19.6296296   | 3 | 5 | 3 | 30    | 7.69  | 79  | 3 |
| AOA087X0M4 | Kanadaptin   | 8.49056604   | 4 | 4 | 4 | 82.8  | 5.1   | 46  | 4 |
| AOA087X1E4 | Arfaptin-2   | 9.62566845   | 3 | 3 | 2 | 41.6  | 6.38  | 0   | 3 |
| Q9Y6I3     | Epsin-1 OS   | -11.4583333  | 3 | 3 | 3 | 60.3  | 4.83  | 36  | 3 |
| X6RAY8     | 39S ribosom  | 9.24369748   | 3 | 3 | 3 | 39.6  | 10.59 | 49  | 3 |
| Q96EL3     | 39S ribosom  | 16.0714286   | 1 | 2 | 1 | 12.1  | 8.76  | 66  | 1 |
| B4DIS3     | Dpy-30-like  | 18.3333333   | 2 | 3 | 2 | 13.9  | 7.5   | 107 | 2 |
| Q59GY0     | Apolipoprot  | 26.4150943   | 4 | 4 | 4 | 25.2  | 8.57  | 0   | 4 |
| O75179     | Ankyrin re   | 2.68920476   | 3 | 3 | 3 | 274.1 | 6.52  | 74  | 3 |
| Q5D1D5     | Guanylate    | 16.58783784  | 3 | 3 | 3 | 67.9  | 6.32  | 36  | 3 |
| Q9Y5U9     | Immediate    | 24.3902439   | 1 | 2 | 1 | 9     | 8.22  | 104 | 1 |
| B2RDR4     | cDNA, FLJ9   | 15.6769596   | 4 | 4 | 4 | 47.9  | 7.68  | 41  | 4 |
| P18858     | DNA ligase   | 3.26441785   | 2 | 2 | 2 | 101.7 | 5.62  | 39  | 2 |
| Q96FX7     | tRNA (adeni  | 15.2249135   | 3 | 3 | 3 | 31.4  | 7.36  | 0   | 3 |
| Q68E01     | Integrator   | 3.83509108   | 2 | 2 | 2 | 118   | 5.8   | 87  | 2 |
| Q9H6Z4     | Ran-binding  | 5.99647266   | 2 | 3 | 2 | 60.2  | 4.78  | 45  | 2 |
| B4DN80     | Peptidyl-p   | 9.57446809   | 2 | 2 | 2 | 33    | 9.26  | 51  | 2 |
| AOA024RD36 | Ribosomal    | 16.0784314   | 4 | 5 | 4 | 29.7  | 10.52 | 81  | 4 |
| Q16539     | Mitogen-act  | 10.2777778   | 3 | 4 | 3 | 41.3  | 5.78  | 44  | 3 |
| Q6FGX3     | RAB6A prote  | 18.75        | 3 | 5 | 2 | 23.5  | 5.38  | 100 | 3 |
| B2RBL3     | Thymidine    | 15.80912863  | 2 | 2 | 2 | 49.9  | 5.53  | 76  | 2 |
| P15291     | Beta-1,4-g   | 3.01507538   | 1 | 2 | 1 | 43.9  | 8.65  | 48  | 1 |
| Q16775     | Hydroxyacyl  | 14.6103896   | 3 | 3 | 3 | 33.8  | 8.12  | 59  | 3 |
| Q5H9R7     | Serine/thre  | 2.63459336   | 2 | 2 | 2 | 97.6  | 4.6   | 79  | 2 |
| P46734     | Dual specifi | 14.9855908   | 4 | 4 | 4 | 39.3  | 7.43  | 59  | 4 |
| Q6P587     | Acylpyruva   | 16.9642857   | 3 | 3 | 3 | 24.8  | 7.39  | 77  | 3 |
| Q4G176     | Acyl-CoA sy  | 7.8125       | 3 | 4 | 3 | 64.1  | 8.37  | 71  | 3 |
| Q6P1N0     | Coiled-coil  | 3.15457413   | 3 | 3 | 3 | 104   | 8.09  | 55  | 3 |
| Q13084     | 39S ribosom  | 20.703125    | 4 | 8 | 4 | 30.1  | 8.29  | 30  | 4 |
| Q9Y3D5     | 28S ribosom  | 13.3802817   | 1 | 2 | 1 | 15.8  | 9.55  | 70  | 1 |
| O95059     | Ribonucleas  | 12.9032258   | 1 | 2 | 1 | 13.7  | 7.75  | 101 | 1 |
| P49959     | Double-str   | 8.61581921   | 4 | 5 | 4 | 80.5  | 5.9   | 42  | 4 |
| O60343     | TBC1 domai   | 1.92604006   | 2 | 2 | 2 | 146.5 | 7.01  | 73  | 2 |
| Q96B36     | Proline-ric  | 11.71875     | 2 | 2 | 2 | 27.4  | 4.75  | 89  | 2 |
| C9JEJ2     | Choline-ph   | 7.36842105   | 2 | 2 | 2 | 43.2  | 8.5   | 88  | 2 |
| Q9H2J7     | Sodium-dep   | 2.60273973   | 1 | 2 | 1 | 81.8  | 5.19  | 48  | 1 |
| Q96A35     | 39S ribosom  | 17.1296296   | 2 | 2 | 2 | 24.9  | 9.29  | 41  | 2 |
| Q9UI12     | V-type prot  | 6.6252588    | 2 | 2 | 2 | 55.8  | 6.48  | 72  | 2 |
| A8K4G7     | cDNA FLJ7    | 8.55855856   | 3 | 4 | 2 | 49.2  | 6.76  | 73  | 3 |
| C9J8T6     | Cytochrome   | 16.3265306   | 1 | 1 | 1 | 10.8  | 7.77  | 84  | 1 |
| Q9Y5A9     | YTH domain   | -6.21761658  | 3 | 3 | 3 | 62.3  | 8.79  | 74  | 3 |
| AOA140VJI4 | Testicular   | 18.0327869   | 2 | 3 | 2 | 13.3  | 8.35  | 76  | 2 |

|            |                        |   |   |   |       |       |     |   |
|------------|------------------------|---|---|---|-------|-------|-----|---|
| P23434     | Glycine cle17.3410405  | 2 | 2 | 2 | 18.9  | 4.88  | 75  | 2 |
| Q8N2U0     | Transmembr24.7787611   | 1 | 1 | 1 | 11.7  | 8.94  | 50  | 1 |
| Q9NXV6     | CDKN2A-int5.86206897   | 2 | 2 | 2 | 61.1  | 9.01  | 128 | 2 |
| Q92599     | Septin-8 OS7.86749482  | 3 | 4 | 1 | 55.7  | 6.28  | 60  | 3 |
| Q9NT62     | Ubiquitin-18.28025478  | 2 | 2 | 2 | 35.8  | 4.74  | 112 | 2 |
| Q96L92     | Sorting ne5.17560074   | 2 | 2 | 2 | 61.2  | 6.49  | 70  | 2 |
| Q9Y6G9     | Cytoplasmic12.0458891  | 4 | 4 | 3 | 56.5  | 6.42  | 55  | 4 |
| Q53GQ0     | Very-long-9.61538462   | 2 | 2 | 2 | 34.3  | 9.32  | 66  | 2 |
| Q55QH4     | DBP2 protei4.32276657  | 3 | 4 | 3 | 119.2 | 6.8   | 34  | 3 |
| Q96C86     | m7GpppX di10.9792285   | 3 | 3 | 3 | 38.6  | 6.38  | 71  | 3 |
| O14545     | TRAF-type 3.95189003   | 2 | 2 | 2 | 64.8  | 5.29  | 89  | 2 |
| Q9BQ75     | Protein CM8.2437276    | 2 | 3 | 2 | 31.9  | 9.19  | 56  | 2 |
| Q9UL26     | Ras-relatec16.4948454  | 2 | 3 | 1 | 21.8  | 8.15  | 98  | 2 |
| P61964     | WD repeat-12.8742515   | 3 | 4 | 3 | 36.6  | 8.27  | 22  | 3 |
| P60468     | Protein trc 37.5       | 3 | 3 | 3 | 10    | 11.56 | 54  | 3 |
| Q9BV40     | Vesicle-ass 23         | 2 | 3 | 2 | 11.4  | 7.34  | 52  | 2 |
| P57737     | Coronin-7 (3.89189189  | 2 | 2 | 2 | 100.5 | 5.8   | 37  | 2 |
| Q9H3U1     | Protein unc6.46186441  | 5 | 6 | 5 | 103   | 6.07  | 40  | 5 |
| Q9HCS7     | Pre-mRNA-sf2.69005848  | 2 | 2 | 2 | 99.9  | 6.23  | 93  | 2 |
| P61764     | Syntaxin-bi7.40740741  | 3 | 3 | 3 | 67.5  | 6.96  | 59  | 3 |
| V9HWG3     | Epididymis 5.38573508  | 2 | 4 | 2 | 77.3  | 5.22  | 26  | 2 |
| B2R6P4     | cDNA, FLJ916.8181818   | 3 | 3 | 3 | 25    | 8.6   | 58  | 3 |
| O43719     | HIV Tat-spe4.10596026  | 3 | 4 | 3 | 85.8  | 4.4   | 58  | 3 |
| P41208     | Centrin-2 (14.5348837  | 2 | 2 | 2 | 19.7  | 5     | 106 | 2 |
| Q8NBN3     | Transmembr7.56756757   | 2 | 2 | 2 | 63.4  | 6.74  | 32  | 2 |
| Q1ED39     | Lysine-ric5.89519651   | 2 | 3 | 2 | 51.6  | 9.86  | 58  | 2 |
| V9GZ56     | U6 snRNA-a9.66386555   | 2 | 2 | 2 | 25.7  | 10.15 | 46  | 2 |
| Q6FHF7     | RABGGTA prc7.93650794  | 3 | 3 | 3 | 65    | 5.74  | 67  | 3 |
| Q9H223     | EH domain-c6.09981516  | 3 | 3 | 3 | 61.1  | 6.76  | 60  | 3 |
| P10909     | Clusterin (4.45434298  | 2 | 2 | 2 | 52.5  | 6.27  | 65  | 2 |
| E9PQY2     | Prefoldin 16.9117647   | 2 | 3 | 2 | 15.6  | 4.58  | 85  | 2 |
| P46937     | Transcripti6.94444444  | 4 | 4 | 3 | 54.4  | 5.17  | 46  | 4 |
| Q9GZU8     | Protein FA8.66141732   | 2 | 2 | 2 | 28.9  | 5.45  | 104 | 2 |
| Q53FR9     | COMM domai37.3737374   | 4 | 4 | 4 | 21.8  | 5.88  | 34  | 4 |
| Q14344     | Guanine nuc9.28381963  | 3 | 3 | 2 | 44    | 8     | 84  | 3 |
| Q9NUJ1     | Mycophenoli 9.1503268  | 2 | 2 | 2 | 33.9  | 8.57  | 42  | 2 |
| O75940     | Survival of8.82352941  | 1 | 1 | 1 | 26.7  | 7.24  | 42  | 1 |
| Q8WXF1     | Paraspeckle7.64818356  | 2 | 2 | 2 | 58.7  | 6.67  | 62  | 2 |
| Q9UPQ0     | LIM and cal4.89381348  | 3 | 4 | 3 | 121.8 | 6.47  | 45  | 3 |
| O14530     | Thioredoxir7.96460177  | 2 | 3 | 2 | 26.5  | 5.88  | 56  | 2 |
| Q59G94     | Zinc finger7.45967742  | 3 | 3 | 3 | 52.8  | 9.01  | 40  | 3 |
| Q8WUY1     | Protein THE19.2307692  | 4 | 4 | 4 | 23.9  | 9.55  | 44  | 4 |
| Q9NQZ2     | Something 8.97703549   | 2 | 3 | 2 | 54.5  | 5.62  | 35  | 2 |
| P29317     | Ephrin type2.86885246  | 2 | 2 | 2 | 108.2 | 6.23  | 72  | 2 |
| Q9GZR2     | RNA exonucl4.73933649  | 2 | 3 | 2 | 46.6  | 9.77  | 63  | 2 |
| Q96CN7     | Isochorism12.4161074   | 2 | 3 | 2 | 32.2  | 7.39  | 29  | 2 |
| Q6PJG6     | BRCA1-assoc3.53227771  | 3 | 3 | 3 | 88.1  | 5.27  | 82  | 3 |
| Q96JB5     | CDK5 regul7.11462451   | 4 | 5 | 3 | 56.9  | 4.75  | 90  | 4 |
| B3KN49     | cDNA FLJ134.73537604   | 1 | 1 | 1 | 40.6  | 4.89  | 86  | 1 |
| Q96TC7     | Regulator c5.95744681  | 2 | 2 | 2 | 52.1  | 5.1   | 62  | 2 |
| Q8NFW8     | N-acylneur8.06451613   | 3 | 3 | 3 | 48.3  | 7.93  | 52  | 3 |
| P56270     | Myc-associ6.70859539   | 3 | 4 | 2 | 48.6  | 8.95  | 0   | 3 |
| Q496I0     | COX7A2 prot37.3493976  | 3 | 3 | 3 | 9.4   | 9.57  | 101 | 3 |
| Q9Y2T2     | AP-3 compl12.4401914   | 3 | 3 | 3 | 46.9  | 6.93  | 45  | 3 |
| A4DOV4     | Capping prc8.39160839  | 2 | 2 | 1 | 32.9  | 5.85  | 95  | 2 |
| O95487     | Protein trc2.12933754  | 2 | 2 | 2 | 137.3 | 6.67  | 86  | 2 |
| P30049     | ATP syntha13.6904762   | 2 | 2 | 2 | 17.5  | 5.49  | 97  | 2 |
| AOA0G2JR96 | Cytoplasmic4.29234339  | 3 | 3 | 1 | 100.2 | 6.44  | 73  | 3 |
| Q9UK59     | Lariat debri8.63970588 | 3 | 3 | 3 | 61.5  | 5.47  | 58  | 3 |
| Q9BZX2     | Uridine-cyt11.8773946  | 2 | 2 | 2 | 29.3  | 6.7   | 44  | 2 |
| Q96KGG9    | N-terminal 3.71287129  | 2 | 2 | 2 | 89.6  | 6.3   | 83  | 2 |
| Q13217     | DnaJ homolc9.12698413  | 3 | 3 | 3 | 57.5  | 6.15  | 91  | 3 |
| G5EA09     | Syndecan bi21.3836478  | 3 | 5 | 3 | 34.8  | 8.51  | 0   | 3 |
| AOA087WU53 | Magnesium t6.53950954  | 2 | 3 | 2 | 41.5  | 9.94  | 57  | 2 |
| Q9Y5X3     | Sorting ne7.67326733   | 2 | 2 | 2 | 46.8  | 6.76  | 94  | 2 |
| P51151     | Ras-relatec12.9353234  | 2 | 2 | 2 | 22.8  | 5.47  | 89  | 2 |
| J3KQL8     | Apolipoprot6.45879733  | 3 | 3 | 3 | 48.9  | 6     | 62  | 3 |
| Q53EY9     | F-box only 5.95533499  | 2 | 2 | 2 | 44.5  | 7.03  | 101 | 2 |
| G3V3D1     | Epididymal 17.6470588  | 2 | 2 | 2 | 23.7  | 6.73  | 48  | 2 |
| AOA024R7I0 | GIPC PDZ dc8.40840841  | 2 | 2 | 2 | 36    | 6.28  | 69  | 2 |
| Q8NDC0     | MAPK-interc6.93877551  | 1 | 2 | 1 | 24.3  | 5.62  | 114 | 1 |
| O15116     | U6 snRNA-a9.075188     | 3 | 3 | 3 | 15.2  | 5.22  | 51  | 3 |
| Q9NU22     | Midasin OS0.96497498   | 4 | 5 | 4 | 632.4 | 5.68  | 65  | 4 |

|            |             |               |   |    |   |       |       |     |   |
|------------|-------------|---------------|---|----|---|-------|-------|-----|---|
| Q8TF05     | Serine/thr  | 3.78947368    | 3 | 3  | 3 | 106.9 | 4.77  | 72  | 3 |
| B3KM47     | cDNA FLJ10  | 4.7           | 3 | 3  | 2 | 111   | 5.45  | 28  | 3 |
| A0AV96     | RNA-binding | 6.5767285     | 2 | 2  | 2 | 64.1  | 7.68  | 54  | 2 |
| G3V4P8     | Glia matur  | 16.6666667    | 2 | 2  | 2 | 17.5  | 5.31  | 83  | 2 |
| F8VX04     | Sodium-cou  | 9.34393638    | 3 | 4  | 3 | 56.2  | 7.69  | 0   | 3 |
| P23368     | NAD-depend  | 4.10958904    | 2 | 2  | 2 | 65.4  | 7.61  | 132 | 2 |
| P35610     | Sterol O-ac | 2.90909091    | 1 | 2  | 1 | 64.7  | 8.94  | 46  | 1 |
| Q9HCU5     | Prolactin r | 8.63309353    | 2 | 2  | 2 | 45.4  | 7.88  | 30  | 2 |
| Q2TAA2     | Isoamyl ac  | 14.516129     | 2 | 2  | 2 | 27.6  | 5.3   | 52  | 2 |
| BOUZZ8     | Chromosome  | 5.40983607    | 3 | 3  | 3 | 68    | 9.67  | 59  | 3 |
| Q9UHQ9     | NADH-cyto   | 13.442623     | 3 | 4  | 3 | 34.1  | 9.38  | 37  | 3 |
| AOA0S2Z5H0 | Mitochondr  | 10.9375       | 2 | 2  | 2 | 21.4  | 9.1   | 103 | 2 |
| AOA087WT20 | DDB1- and   | (5.02512563   | 2 | 2  | 2 | 67.5  | 9.29  | 68  | 2 |
| B3KRA1     | cDNA FLJ33  | 8.63557858    | 3 | 3  | 1 | 63.5  | 8.07  | 39  | 3 |
| Q05932     | Folylpolyg  | 18.17717206   | 3 | 3  | 3 | 64.6  | 7.94  | 34  | 3 |
| E7ETB3     | Aspartyl an | 11.5618661    | 3 | 4  | 3 | 54.5  | 7.74  | 37  | 3 |
| AOA024RBR3 | Density-reg | 21.2121212    | 3 | 3  | 3 | 22.1  | 5.3   | 41  | 3 |
| AOA087WSV8 | Nucleobindi | 6.9047619     | 3 | 3  | 2 | 50.2  | 5.12  | 60  | 3 |
| O15357     | Phosphatid  | 5.80286169    | 4 | 5  | 4 | 138.5 | 6.54  | 42  | 4 |
| AOA024RCR2 | Guanine nuc | 4.11861614    | 2 | 2  | 2 | 68.6  | 5.8   | 73  | 2 |
| Q9H814     | Phosphoryl  | 6.59898477    | 2 | 2  | 2 | 44.4  | 5.4   | 0   | 2 |
| Q86TB9     | Protein PA  | 12.46753247   | 1 | 2  | 1 | 86.8  | 6.67  | 67  | 1 |
| P10586     | Receptor-t  | 2.30728894    | 3 | 3  | 3 | 212.7 | 6.3   | 43  | 3 |
| O43765     | Small glut  | 7.98722045    | 2 | 2  | 2 | 34    | 4.87  | 74  | 2 |
| AOA024R1T1 | Ribosomal   | 1.25          | 2 | 2  | 2 | 15.4  | 10.74 | 38  | 2 |
| Q15527     | Surfeit loc | 11.71875      | 3 | 4  | 3 | 29.6  | 9.22  | 0   | 3 |
| Q6P1L8     | 39S ribos   | 9.65517241    | 1 | 2  | 1 | 15.9  | 10.24 | 44  | 1 |
| O15269     | Serine pal  | 5.91966173    | 2 | 2  | 2 | 52.7  | 6.01  | 52  | 2 |
| B4DLM8     | cDNA FLJ5   | 615.95794393  | 3 | 3  | 3 | 95    | 6.58  | 35  | 3 |
| AOA024R601 | Ceroid-lip  | 10.9324759    | 2 | 2  | 2 | 35.9  | 8.87  | 38  | 2 |
| BOAZS5     | Kinesin-li  | 6.96969697    | 4 | 4  | 4 | 75    | 6.4   | 77  | 4 |
| Q14232     | Translatio  | 6.2295082     | 3 | 3  | 3 | 33.7  | 7.33  | 78  | 3 |
| O60936     | Nucleolar   | 17.3076923    | 2 | 2  | 2 | 22.6  | 4.18  | 39  | 2 |
| P05161     | Ubiquitin-  | 123.6363636   | 2 | 3  | 2 | 17.9  | 7.44  | 54  | 2 |
| G3V4T6     | Maleylacet  | 15.6682028    | 2 | 2  | 2 | 24.2  | 7.18  | 46  | 2 |
| Q5J TZ9    | Alanine--   | tf2.53807107  | 2 | 3  | 2 | 107.3 | 6.27  | 77  | 2 |
| F5H619     | HEAT repeat | 1.4173998     | 2 | 2  | 2 | 222.6 | 6.55  | 75  | 2 |
| O95169     | NADH dehyd  | 9.13978495    | 2 | 3  | 2 | 21.8  | 6.8   | 0   | 2 |
| P10301     | Ras-relate  | 10.5504587    | 2 | 2  | 1 | 23.5  | 6.93  | 72  | 2 |
| Q9UKF6     | Cleavage ar | 4.38596491    | 3 | 3  | 3 | 77.4  | 5.6   | 51  | 3 |
| Q96I59     | Probable a  | 5.87002096    | 2 | 2  | 2 | 54.1  | 7.24  | 48  | 2 |
| Q7Z3B4     | Nucleopor   | ir5.32544379  | 2 | 2  | 2 | 55.4  | 7.02  | 67  | 2 |
| Q06787     | Synaptic ft | 7.91139241    | 4 | 6  | 2 | 71.1  | 7.42  | 55  | 4 |
| Q96I99     | Succinate-- | 10.1851852    | 4 | 4  | 4 | 46.5  | 6.39  | 76  | 4 |
| Q06136     | 3-ketodihy  | c4.81927711   | 1 | 2  | 1 | 36.2  | 7.12  | 63  | 1 |
| Q9Y2P8     | RNA 3'-ter  | n9.65147453   | 3 | 3  | 3 | 40.8  | 9.26  | 67  | 3 |
| P36405     | ADP-ribosy  | l18.1318681   | 2 | 2  | 2 | 20.4  | 7.24  | 45  | 2 |
| Q5JS54     | Proteasome  | 30.0813008    | 2 | 3  | 2 | 13.8  | 6.52  | 28  | 2 |
| Q9NXE4     | Sphingomye  | l3.74848851   | 2 | 2  | 2 | 93.3  | 7.97  | 56  | 2 |
| Q9NRN7     | L-aminoadi  | p11.0032362   | 3 | 3  | 3 | 35.8  | 6.8   | 63  | 3 |
| Q99700     | Ataxin-2    | O5.2.43716679 | 2 | 2  | 2 | 140.2 | 9.57  | 53  | 2 |
| P08397     | Porphobilir | 15.7894737    | 4 | 4  | 4 | 39.3  | 7.18  | 46  | 4 |
| Q9BUR5     | MICOS compl | 15.6565657    | 2 | 2  | 2 | 22.3  | 9.13  | 69  | 2 |
| Q9P2R3     | Rabankyrin  | -2.82292558   | 3 | 3  | 3 | 128.3 | 6.1   | 67  | 3 |
| Q5HY81     | Ubiquitin-  | l19.4444444   | 3 | 3  | 3 | 20.5  | 9.55  | 46  | 3 |
| P49593     | Protein ph  | c10.3524229   | 2 | 4  | 2 | 49.8  | 5.1   | 0   | 2 |
| Q14997     | Proteasome  | 2.76722735    | 3 | 3  | 3 | 211.2 | 6.9   | 25  | 3 |
| Q13188     | Serine/thr  | c6.92464358   | 3 | 3  | 3 | 56.3  | 5.24  | 24  | 3 |
| D3DWY7     | von Hippel  | -9.44206009   | 2 | 2  | 2 | 26.5  | 9.01  | 82  | 2 |
| AOA024RDV9 | Spastic pai | 4.05405405    | 2 | 2  | 2 | 72.8  | 5.91  | 94  | 2 |
| Q96IZ0     | PRKC apopt  | c8.23529412   | 2 | 2  | 2 | 36.5  | 5.41  | 75  | 2 |
| Q6ZSJ8     | Uncharacter | 33.6363636    | 2 | 2  | 2 | 11.5  | 6.73  | 55  | 2 |
| P53384     | Cytosolic   | 1.15.3125     | 3 | 3  | 3 | 34.5  | 5.33  | 43  | 3 |
| Q6UW78     | Ubiquinol-  | c23.655914    | 1 | 1  | 1 | 10.1  | 9.41  | 109 | 1 |
| H7C1E4     | AP-1 comple | c8.37696335   | 1 | 1  | 1 | 22.2  | 9.16  | 93  | 1 |
| Q07960     | Rho GTPase  | -9.33940774   | 2 | 3  | 2 | 50.4  | 6.29  | 46  | 2 |
| P35573     | Glycogen d  | c3.19843342   | 4 | 4  | 4 | 174.7 | 6.76  | 0   | 4 |
| O00461     | Golgi integ | 3.59195402    | 2 | 2  | 2 | 81.8  | 4.77  | 59  | 2 |
| Q6DN03     | Putative hi | l2.4352332    | 2 | 16 | 2 | 21.5  | 10.7  | 103 | 2 |
| Q96A26     | Protein FA  | l12.3376623   | 2 | 3  | 2 | 17.3  | 9.77  | 73  | 2 |
| P38432     | Coilin OS=  | f6.07638889   | 3 | 3  | 3 | 62.6  | 9.07  | 66  | 3 |
| P61803     | Dolichyl-di | l19.4690265   | 2 | 2  | 2 | 12.5  | 7.08  | 90  | 2 |
| Q9Y5K8     | V-type prot | 6.47773279    | 1 | 1  | 1 | 28.2  | 9.36  | 97  | 1 |

|            |                       |   |   |   |       |       |     |   |
|------------|-----------------------|---|---|---|-------|-------|-----|---|
| Q12802     | A-kinase ar0.92428013 | 2 | 2 | 2 | 307.4 | 5.24  | 74  | 2 |
| B2R8U9     | Caspase OS-8.16831683 | 3 | 3 | 3 | 45.1  | 5.91  | 55  | 3 |
| Q96EI5     | Transcripti10.6976744 | 2 | 2 | 2 | 24.6  | 5.2   | 85  | 2 |
| Q9H9P8     | L-2-hydroxy5.18358531 | 2 | 2 | 2 | 50.3  | 8.15  | 85  | 2 |
| P19525     | Interferon-6.17059891 | 4 | 4 | 4 | 62.1  | 8.4   | 53  | 4 |
| B2RB57     | cDNA, FLJ9:3.12944523 | 2 | 2 | 2 | 77.9  | 6.24  | 44  | 2 |
| Q8TAE8     | Growth arrc18.9189189 | 3 | 3 | 3 | 25.4  | 10.02 | 40  | 3 |
| Q14669     | E3 ubiquiti2.25903614 | 3 | 4 | 3 | 220.3 | 8.48  | 49  | 3 |
| Q9UBI1     | COMM domair11.2820513 | 1 | 1 | 1 | 22.1  | 5.99  | 76  | 1 |
| Q9Y2A7     | Nck-associ2.30496454  | 2 | 2 | 2 | 128.7 | 6.62  | 57  | 2 |
| AOA0S2Z3R6 | Laminin bei2.21843003 | 2 | 2 | 2 | 129.5 | 7.21  | 106 | 2 |
| Q9UNQ2     | Probable di16.6134185 | 3 | 4 | 3 | 35.2  | 9.99  | 66  | 3 |
| AOA024R5U5 | ADAM metal13.60962567 | 2 | 2 | 2 | 84.1  | 7.77  | 52  | 2 |
| P49841     | Glycogen sy6.19047619 | 2 | 3 | 2 | 46.7  | 8.78  | 58  | 2 |
| Q969N2     | GPI transan7.95847751 | 4 | 4 | 4 | 65.7  | 8.38  | 42  | 4 |
| O95218     | Zinc finger 13.030303 | 4 | 4 | 4 | 37.4  | 10.01 | 35  | 4 |
| B2RDN3     | Cytosolic F16.6051661 | 3 | 3 | 3 | 28.9  | 5.83  | 44  | 3 |
| O43752     | Syntaxin-6 13.7254902 | 2 | 2 | 2 | 29.2  | 4.93  | 51  | 2 |
| AOA0D9SF50 | Lys-63-spec8.83280757 | 2 | 2 | 2 | 36.1  | 6.2   | 61  | 2 |
| H7BYT1     | Casein kin2.57611241  | 1 | 2 | 1 | 49    | 9.94  | 57  | 1 |
| Q99808     | Equilibrati5.26315789 | 2 | 2 | 2 | 50.2  | 8.29  | 55  | 2 |
| Q9P013     | Spliceosom10.4803493  | 1 | 1 | 1 | 26.6  | 5.71  | 73  | 1 |
| AOA024QZW2 | Nucleolar p12.8404669 | 2 | 2 | 2 | 29.4  | 9.67  | 0   | 2 |
| P04181     | Ornithine t7.97266515 | 3 | 3 | 2 | 48.5  | 7.03  | 56  | 3 |
| HOY8P4     | U3 small nt8.25688073 | 4 | 4 | 4 | 61.4  | 9.04  | 43  | 4 |
| O60888     | Protein Cut22.9050279 | 2 | 4 | 2 | 19.1  | 5.5   | 54  | 2 |
| Q53Y06     | ATPase, H+ 6.19469027 | 1 | 1 | 1 | 26.1  | 8     | 60  | 1 |
| B4E2A6     | cDNA FLJ55:6.11702128 | 2 | 2 | 2 | 83.9  | 6.84  | 0   | 2 |
| AOA024R7N7 | Interferon, 4.4       | 1 | 2 | 1 | 27.9  | 4.88  | 67  | 1 |
| B2R7C2     | cDNA, FLJ9:4.10783055 | 2 | 2 | 2 | 88.8  | 6.27  | 73  | 2 |
| P16930     | Fumarylacet8.11455847 | 2 | 2 | 2 | 46.3  | 6.95  | 0   | 2 |
| Q9H4L7     | SWI/SNF-re12.63157895 | 2 | 2 | 2 | 117.3 | 5.55  | 49  | 2 |
| AOA024R7L2 | HSPC142 prc9.72644377 | 2 | 2 | 2 | 36.5  | 4.64  | 85  | 2 |
| Q00535     | Cyclin-depe10.6164384 | 3 | 3 | 2 | 33.3  | 7.66  | 60  | 3 |
| AOA075B746 | 28S ribosom29.8850575 | 2 | 2 | 2 | 10.7  | 9.92  | 85  | 2 |
| Q9NZ63     | Uncharacter10.3806228 | 2 | 2 | 2 | 33.7  | 6.74  | 33  | 2 |
| Q9H3S7     | Tyrosine-p12.81173594 | 3 | 3 | 3 | 178.9 | 6.92  | 0   | 3 |
| AOA024R978 | Chromosome 4.20258621 | 2 | 2 | 2 | 103.1 | 4.78  | 0   | 2 |
| B1AKJ6     | Oxysterol-t5.93792173 | 3 | 3 | 3 | 83.7  | 6.48  | 0   | 3 |
| Q03468     | DNA excisic1.27260549 | 1 | 1 | 1 | 168.3 | 8.09  | 98  | 1 |
| Q96B49     | Mitochondri37.8378378 | 1 | 1 | 1 | 8     | 4.89  | 46  | 1 |
| Q06587     | E3 ubiquiti6.89655172 | 2 | 2 | 2 | 42.4  | 5.62  | 62  | 2 |
| Q13526     | Peptidyl-pr9.20245399 | 1 | 2 | 1 | 18.2  | 8.82  | 43  | 1 |
| O60826     | Coiled-coil6.69856459 | 2 | 2 | 2 | 70.7  | 6.74  | 39  | 2 |
| Q5SRD1     | Putative mi12.0622568 | 2 | 3 | 2 | 28    | 9.39  | 68  | 2 |
| Q68CQ4     | Digestive c4.89417989 | 2 | 2 | 2 | 87    | 5.88  | 41  | 2 |
| Q53GS7     | Nucleoporin5.15759312 | 2 | 2 | 2 | 79.8  | 7.43  | 65  | 2 |
| Q8IYB8     | ATP-depend2.79898219  | 2 | 2 | 2 | 87.9  | 7.99  | 50  | 2 |
| P11802     | Cyclin-depe11.8811881 | 3 | 3 | 2 | 33.7  | 7.01  | 72  | 3 |
| Q14554     | Protein di:8.28516378 | 4 | 4 | 4 | 59.6  | 7.91  | 39  | 4 |
| Q6IPL9     | HMGAl protc13.0841121 | 1 | 9 | 1 | 11.6  | 11.06 | 144 | 1 |
| Q13601     | KRR1 small 6.03674541 | 2 | 2 | 2 | 43.6  | 9.77  | 57  | 2 |
| P60602     | Reactive o:21.5189873 | 1 | 1 | 1 | 8.2   | 9.33  | 79  | 1 |
| Q5T310     | G patch dom 6.7264574 | 2 | 2 | 2 | 50.4  | 9.63  | 88  | 2 |
| AOA0AOMRK6 | Metaxin 1, 7.93991416 | 2 | 2 | 2 | 51.4  | 9.79  | 49  | 2 |
| O94822     | E3 ubiquiti3.51075878 | 4 | 4 | 4 | 200.4 | 6.25  | 33  | 4 |
| V9HW00     | Epididymis 7.69230769 | 2 | 2 | 2 | 39    | 9.57  | 43  | 2 |
| AOA024R2M7 | Oxidative-:4.17457306 | 2 | 2 | 2 | 58    | 6.43  | 95  | 2 |
| Q8NHH9     | Atlantin-2 5.31732419 | 3 | 4 | 3 | 66.2  | 5.48  | 22  | 3 |
| AOA087WY85 | Ubiquitin-c16.2162162 | 2 | 2 | 2 | 16.8  | 8.44  | 65  | 2 |
| Q5STK2     | Prefoldin s 15.503876 | 2 | 3 | 2 | 14.6  | 8.88  | 47  | 2 |
| Q9Y3D6     | Mitochondri15.7894737 | 2 | 3 | 2 | 16.9  | 8.79  | 52  | 2 |
| Q9NRG0     | Chromatin t 13.740458 | 1 | 1 | 1 | 14.7  | 5.1   | 87  | 1 |
| Q9NYJ1     | Cytochrome 34.4827586 | 2 | 3 | 2 | 10.1  | 6.04  | 81  | 2 |
| O00193     | Small acid12.568306   | 1 | 1 | 1 | 20.3  | 4.72  | 41  | 1 |
| Q15648     | Mediator o11.45477546 | 2 | 2 | 2 | 168.4 | 8.73  | 79  | 2 |
| Q14966     | Zinc finger1.51668352 | 3 | 3 | 3 | 220.5 | 6.38  | 74  | 3 |
| Q59HH7     | X-ray repai4.48222566 | 2 | 2 | 2 | 71    | 6.04  | 44  | 2 |
| Q9GZN8     | UPF0687 prc18.9655172 | 2 | 2 | 2 | 19.3  | 6.84  | 38  | 2 |
| P23229     | Integrin all.85840708 | 2 | 2 | 2 | 126.5 | 6.61  | 55  | 2 |
| AOA024R473 | Mitochondri12.0481928 | 3 | 3 | 3 | 37.5  | 8.4   | 0   | 3 |
| AOA140VKA9 | Testis secl16.8032787 | 3 | 3 | 3 | 25.8  | 7.37  | 46  | 3 |
| Q8WVJ2     | NudC domair17.1974522 | 2 | 2 | 2 | 17.7  | 5.07  | 76  | 2 |

|            |             |             |   |   |   |       |       |    |   |
|------------|-------------|-------------|---|---|---|-------|-------|----|---|
| J3QK89     | Calcium hon | 3.45199569  | 2 | 3 | 2 | 104.9 | 9.19  | 32 | 2 |
| AOA024R6N2 | CDC42 bindi | 1.81180596  | 2 | 2 | 2 | 194.2 | 6.37  | 67 | 2 |
| P06280     | Alpha-galac | 6.75990676  | 2 | 2 | 2 | 48.7  | 5.6   | 28 | 2 |
| Q86WV7     | CCDC43 prot | 11.8942731  | 2 | 2 | 2 | 25.5  | 4.92  | 67 | 2 |
| Q9UK22     | F-box only  | 9.7972973   | 2 | 2 | 2 | 33.3  | 4.37  | 36 | 2 |
| Q53RG0     | Eukaryotic  | 8.57142857  | 2 | 2 | 2 | 28.3  | 8.88  | 64 | 2 |
| Q9Y4E8     | Ubiquitin c | 2.54841998  | 2 | 2 | 2 | 112.3 | 5.22  | 71 | 2 |
| Q9POH9     | RER1 protei | 12.6168224  | 2 | 3 | 2 | 24.8  | 9.63  | 0  | 2 |
| AOA0B4J1S4 | Selenoprote | 9.6969697   | 1 | 1 | 1 | 18    | 5.03  | 82 | 1 |
| Q6UW68     | Transmembr  | 16.9312169  | 2 | 2 | 2 | 21.2  | 8.62  | 54 | 2 |
| Q9BVQ7     | Spermatoger | 3.45285525  | 2 | 2 | 2 | 80.7  | 8.09  | 70 | 2 |
| Q15642     | Cdc42-inter | 6.65557404  | 3 | 3 | 3 | 68.3  | 5.73  | 49 | 3 |
| Q02241     | Kinesin-li  | 3.125       | 2 | 2 | 2 | 110   | 8.51  | 72 | 2 |
| G3V3G9     | Uncharacter | 3.4620506   | 2 | 2 | 1 | 84.7  | 5.12  | 52 | 2 |
| P29372     | DNA-3-meth  | 9.06040268  | 2 | 2 | 2 | 32.8  | 9.57  | 43 | 2 |
| Q8WVCO     | RNA polyme  | 4.05405405  | 2 | 2 | 2 | 75.4  | 4.51  | 63 | 2 |
| Q9H2W6     | 39S riboso  | 10.7526882  | 2 | 2 | 2 | 31.7  | 7.05  | 77 | 2 |
| AOJP11     | Phosphoino  | 2.28276878  | 2 | 2 | 2 | 153.1 | 7.23  | 73 | 2 |
| Q9COD9     | Ethanolamir | 4.53400504  | 1 | 1 | 1 | 45.2  | 6.6   | 60 | 1 |
| AOA0S2Z5D6 | Abhydrolas  | 10.3151862  | 2 | 2 | 2 | 39.1  | 6.61  | 55 | 2 |
| HOYJ75     | Serine/thre | 4.52079566  | 2 | 2 | 2 | 64    | 6.74  | 58 | 2 |
| B2R7U4     | cDNA, FLJ9  | 12.8472222  | 2 | 2 | 2 | 32.8  | 8.25  | 44 | 2 |
| Q9BTO9     | Protein car | 5.03597122  | 1 | 1 | 1 | 30.7  | 5.49  | 75 | 1 |
| E5RIM7     | Copper trar | 19.1780822  | 2 | 2 | 2 | 7.9   | 7.24  | 0  | 2 |
| P49902     | Cytosolic p | 7.48663102  | 3 | 3 | 3 | 64.9  | 6.14  | 20 | 3 |
| Q15555     | Microtubul  | 9.17431193  | 2 | 2 | 2 | 37    | 5.57  | 0  | 2 |
| Q8N3C0     | Activating  | 1.45322434  | 2 | 2 | 2 | 251.3 | 7.09  | 22 | 2 |
| Q9NPJ6     | Mediator of | 6.2962963   | 1 | 1 | 1 | 29.7  | 5.1   | 79 | 1 |
| AOA087X295 | WD repeat-  | 3.90964379  | 3 | 3 | 3 | 124.9 | 6.92  | 47 | 3 |
| Q96I15     | ARAF protei | 9.1954023   | 4 | 4 | 4 | 67.9  | 9.09  | 0  | 4 |
| AOA024R9Y6 | Guanine nuc | 5.8419244   | 2 | 2 | 2 | 65.5  | 8.44  | 24 | 2 |
| Q6NUK7     | Tyrosine-p  | 6.18556701  | 3 | 3 | 1 | 65.8  | 9.09  | 67 | 3 |
| Q92643     | GPI-anchor  | 10.8860759  | 4 | 4 | 4 | 45.2  | 6.16  | 42 | 4 |
| F1JVV5     | EWSR1/ATF1  | 3.72439479  | 2 | 3 | 2 | 57    | 8.57  | 55 | 2 |
| Q9Y2S6     | Translatior | 21.875      | 2 | 4 | 2 | 7.1   | 9.99  | 30 | 2 |
| V9HW09     | Epididymis  | 9.42857143  | 4 | 4 | 4 | 39.6  | 9.7   | 63 | 4 |
| C9JCC6     | Drl-associ  | 10.8490566  | 2 | 2 | 2 | 23.2  | 5.27  | 49 | 2 |
| Q9NY27     | Serine/thre | 6.47482014  | 2 | 2 | 2 | 46.9  | 4.54  | 35 | 2 |
| Q7L2J0     | 7SK snRNA   | n5.51523948 | 3 | 3 | 3 | 74.3  | 9.57  | 0  | 3 |
| Q16186     | Proteasomal | 10.8108108  | 3 | 3 | 3 | 42.1  | 5.07  | 0  | 3 |
| 000499     | Myc box-de  | 7.08263069  | 3 | 3 | 3 | 64.7  | 5.06  | 0  | 3 |
| P82912     | 28S riboso  | 14.9484536  | 1 | 2 | 1 | 20.6  | 10.81 | 57 | 1 |
| P09132     | Signal recc | 10.4166667  | 1 | 1 | 1 | 16.1  | 9.85  | 81 | 1 |
| A8MUM1     | Tumor-suppr | 9.42028986  | 2 | 2 | 2 | 46.3  | 5.07  | 37 | 2 |
| 095197     | Reticulon-  | 1.06589147  | 1 | 2 | 1 | 112.5 | 4.96  | 73 | 1 |
| Q96G21     | U3 small nt | 7.21649485  | 2 | 2 | 2 | 33.7  | 9.47  | 94 | 2 |
| Q00577     | Transcripti | 9.9378882   | 2 | 2 | 1 | 34.9  | 6.44  | 51 | 2 |
| P46109     | Crk-like p  | 13.2013201  | 3 | 3 | 3 | 33.8  | 6.74  | 0  | 3 |
| Q7Z739     | YTH domain  | -6.32478632 | 3 | 3 | 3 | 63.8  | 9.04  | 33 | 3 |
| 000194     | Ras-relate  | 5.50458716  | 2 | 2 | 2 | 24.6  | 5.52  | 72 | 2 |
| Q8NBT2     | Kinetochor  | 10.6598985  | 1 | 1 | 1 | 22.5  | 4.7   | 46 | 1 |
| Q8NHQ9     | ATP-depend  | 4.16666667  | 2 | 2 | 2 | 68.5  | 9.25  | 78 | 2 |
| E5RG17     | Putative de | 6.83229814  | 2 | 2 | 2 | 36.4  | 7.65  | 49 | 2 |
| B2RAM6     | cDNA, FLJ9  | 2.27272727  | 2 | 2 | 2 | 119.1 | 5.72  | 49 | 2 |
| H3BMD8     | cAMP-regul  | 28.2442748  | 2 | 2 | 1 | 14.5  | 8.31  | 39 | 2 |
| Q96AB3     | Isochorism  | 11.2195122  | 1 | 1 | 1 | 22.3  | 7.77  | 72 | 1 |
| Q15363     | Transmembr  | 10.4477612  | 2 | 2 | 2 | 22.7  | 5.17  | 48 | 2 |
| C9JYA1     | Nucleoporin | 5.05747126  | 2 | 2 | 2 | 46.4  | 9.25  | 55 | 2 |
| Q9P2I0     | Cleavage ar | 3.58056266  | 2 | 2 | 2 | 88.4  | 5.11  | 0  | 2 |
| Q9BVJ8     | HEXA protei | 10.5134474  | 3 | 3 | 3 | 47.1  | 5     | 66 | 3 |
| F5GYQ1     | V-type prot | 7.65306122  | 2 | 2 | 2 | 44.6  | 5.14  | 44 | 2 |
| Q9P1F3     | Costars fan | 16.0493827  | 1 | 2 | 1 | 9.1   | 6.29  | 79 | 1 |
| Q15382     | GTP-binding | 12.5        | 2 | 2 | 2 | 20.5  | 5.92  | 63 | 2 |
| P13640     | Metallothio | 20.9677419  | 1 | 2 | 1 | 6.1   | 7.96  | 63 | 1 |
| AOA1BOGTW1 | Tight junc  | 2.16172938  | 2 | 2 | 2 | 140.6 | 8.19  | 72 | 2 |
| Q15796     | Mothers ag  | 5.3531906   | 2 | 3 | 2 | 52.3  | 6.58  | 31 | 2 |
| AOA0S2Z5U7 | Diablo-like | 4.60251046  | 1 | 2 | 1 | 27.1  | 5.9   | 34 | 1 |
| Q9NV31     | U3 small nt | 13.5869565  | 2 | 3 | 2 | 21.8  | 9.5   | 49 | 2 |
| Q9UBU8     | Mortality   | 13.59116022 | 1 | 2 | 1 | 41.4  | 9.28  | 0  | 1 |
| Q96ST2     | Protein IW  | 2.56410256  | 1 | 1 | 1 | 91.9  | 4.69  | 69 | 1 |
| X6R8A1     | Carboxypept | 4.81927711  | 2 | 2 | 2 | 56.2  | 6.61  | 60 | 2 |
| Q969X5     | Endoplasmic | 11.0344828  | 2 | 2 | 2 | 32.6  | 7.06  | 37 | 2 |
| G5E9A6     | Ubiquitin c | 5.54347826  | 2 | 2 | 2 | 105   | 5.33  | 37 | 2 |

|            |                        |   |   |   |       |      |    |   |
|------------|------------------------|---|---|---|-------|------|----|---|
| Q9BUR4     | Telomerase 3.28467153  | 1 | 1 | 1 | 59.3  | 4.58 | 75 | 1 |
| Q5HYL3     | Putative ur33.3333333  | 1 | 2 | 1 | 8     | 7.44 | 21 | 1 |
| Q9UJW0     | Dynactin st7.17391304  | 3 | 3 | 3 | 52.3  | 7.34 | 39 | 3 |
| Q86YP4     | Transcripti3.63349131  | 2 | 2 | 1 | 68    | 9.94 | 67 | 2 |
| O60437     | Periplakin 1.65148064  | 2 | 2 | 2 | 204.6 | 5.6  | 54 | 2 |
| AOA024RDG6 | Scavenger 16.27615063  | 2 | 2 | 2 | 54.3  | 5.14 | 41 | 2 |
| O94903     | Proline syr10.9090909  | 2 | 2 | 2 | 30.3  | 7.5  | 62 | 2 |
| Q8ND56     | Protein LSI7.12742981  | 2 | 2 | 2 | 50.5  | 9.52 | 0  | 2 |
| Q86U90     | YrdC domair9.31899642  | 1 | 1 | 1 | 29.3  | 8.57 | 75 | 1 |
| Q6IAX1     | FDFT1 prote7.43405276  | 2 | 2 | 2 | 48.1  | 6.54 | 65 | 2 |
| Q86XZ4     | Spermatoger2.20183486  | 1 | 2 | 1 | 59.5  | 8.9  | 43 | 1 |
| AOA0C4DFL7 | Lanosterol 6.09037328  | 2 | 2 | 2 | 57.2  | 8.53 | 53 | 2 |
| AOA024RDJ1 | DC2 proteir8.05369128  | 1 | 1 | 1 | 16.8  | 9.13 | 69 | 1 |
| Q9Y3B3     | Transmembr4.46428571   | 1 | 2 | 1 | 25.2  | 6.89 | 63 | 1 |
| P50336     | Protoporph6.07966457   | 2 | 2 | 2 | 50.7  | 8.16 | 33 | 2 |
| P30536     | Translocatc18.3431953  | 2 | 2 | 2 | 18.8  | 9.36 | 39 | 2 |
| AOA140VJQ6 | Oxysterol-t5.75635877  | 3 | 3 | 3 | 83.6  | 7.06 | 36 | 3 |
| Q96D31     | Calcium re14.31893688  | 1 | 2 | 1 | 32.6  | 8.32 | 53 | 1 |
| B4DY17     | Methylthior8.49420849  | 2 | 2 | 2 | 29.2  | 8.15 | 37 | 2 |
| Q969U7     | Proteasome 4.54545455  | 1 | 2 | 1 | 29.4  | 6.98 | 48 | 1 |
| Q99442     | Translocat7.76942356   | 3 | 3 | 3 | 45.8  | 7.12 | 50 | 3 |
| Q96ST3     | Paired ampli2.12097408 | 2 | 2 | 2 | 145.1 | 7.25 | 58 | 2 |
| P46108     | Adapter mol12.1710526  | 3 | 3 | 3 | 33.8  | 5.55 | 65 | 3 |
| Q15397     | Pumilio hon 2.4691358  | 1 | 1 | 1 | 73.5  | 9.64 | 72 | 1 |
| A6NDG6     | Glycerol-3- 4.6728972  | 1 | 2 | 1 | 34    | 6.14 | 59 | 1 |
| O14907     | Tax1-bindir13.7096774  | 1 | 2 | 1 | 13.7  | 8.48 | 85 | 1 |
| P49643     | DNA primasc2.75049116  | 1 | 1 | 1 | 58.8  | 7.91 | 86 | 1 |
| Q13769     | THO complex6.00292826  | 3 | 3 | 3 | 78.5  | 6.87 | 35 | 3 |
| P82675     | 28S ribosom8.13953488  | 3 | 3 | 3 | 48    | 9.92 | 47 | 3 |
| Q9H936     | Mitochondri4.64396285  | 1 | 1 | 1 | 34.4  | 9.29 | 74 | 1 |
| AOA0U1RRH6 | PHD finger 2.10970464  | 2 | 2 | 2 | 106.9 | 5.34 | 70 | 2 |
| AOA0S2Z5J4 | Adaptor-re12.65082267  | 3 | 3 | 3 | 121.2 | 6.04 | 37 | 3 |
| Q9NWW4     | UPF0587 prc 25         | 2 | 2 | 2 | 18    | 5.01 | 0  | 2 |
| Q9H2J4     | Phosducin-17.53138075  | 1 | 2 | 1 | 27.6  | 4.84 | 34 | 1 |
| Q9BRP1     | Programmed 6.1452514   | 2 | 2 | 2 | 39.4  | 4.86 | 44 | 2 |
| Q96G23     | Ceramide sy12.1052632  | 3 | 4 | 3 | 44.8  | 8.98 | 0  | 3 |
| Q6GMX3     | IGL@ protei8.05084746  | 1 | 1 | 1 | 24.7  | 6.89 | 38 | 1 |
| AOA087X1S3 | E3 ubiquiti11.3043478  | 4 | 4 | 1 | 24    | 5.58 | 49 | 4 |
| Q59E89     | DnaJ (Hsp4(6.39534884  | 2 | 2 | 1 | 38.6  | 8.66 | 69 | 2 |
| Q9BXV9     | Uncharacter 43         | 3 | 3 | 3 | 10.9  | 4.27 | 0  | 3 |
| Q9ULW0     | Targeting r5.22088353  | 4 | 4 | 4 | 85.6  | 9.23 | 35 | 4 |
| Q9BV14     | Nucleolar c7.75193798  | 2 | 2 | 2 | 58.4  | 7.49 | 34 | 2 |
| O15397     | Importin-8 3.66441659  | 3 | 3 | 3 | 119.9 | 5.16 | 77 | 3 |
| P53611     | Geranylgerc6.64652568  | 2 | 2 | 2 | 36.9  | 5.03 | 29 | 2 |
| O00154     | Cytosolic z8.68421053  | 3 | 3 | 3 | 41.8  | 8.54 | 35 | 3 |
| Q0VDF9     | Heat shock 7.46561886  | 2 | 2 | 2 | 54.8  | 5.59 | 37 | 2 |
| Q13144     | Translatior 2.7739251  | 2 | 2 | 2 | 80.3  | 5.08 | 63 | 2 |
| Q14676     | Mediator o11.77118238  | 3 | 3 | 3 | 226.5 | 5.47 | 31 | 3 |
| B4DX69     | cdNA FLJ55110.6598985  | 1 | 1 | 1 | 21.8  | 8.57 | 0  | 1 |
| P67812     | Signal pept16.7597765  | 3 | 3 | 3 | 20.6  | 9.48 | 33 | 3 |
| F5H039     | Gephyrin O3.06905371   | 2 | 2 | 2 | 84.7  | 5.73 | 48 | 2 |
| B4E2Q0     | Calcium-trc2.62329486  | 2 | 2 | 2 | 104.6 | 7.2  | 44 | 2 |
| Q6WKZ4     | Rab11 fam11.94855807   | 2 | 2 | 2 | 137.1 | 5.43 | 54 | 2 |
| Q13363     | C-terminal-6.81818182  | 3 | 3 | 1 | 47.5  | 6.77 | 30 | 3 |
| Q92544     | Transmembrc3.27102804  | 1 | 1 | 1 | 74.5  | 6.54 | 44 | 1 |
| B1AKZ4     | Phosphoprot22.3076923  | 2 | 2 | 2 | 15    | 5.02 | 39 | 2 |
| P40306     | Proteasome 7.32600733  | 1 | 1 | 1 | 28.9  | 7.81 | 58 | 1 |
| C9JF46     | LIM and ser13.6363636  | 1 | 1 | 1 | 19.9  | 6.96 | 54 | 1 |
| Q8WWW3     | Reticulon-z5.80808081  | 1 | 1 | 1 | 43.6  | 9.11 | 53 | 1 |
| P40123     | Adenylyl cy7.33752621  | 3 | 3 | 2 | 52.8  | 6.37 | 44 | 3 |
| Q9BZF9     | Uveal autoz0.84745763  | 1 | 1 | 1 | 162.4 | 7.03 | 87 | 1 |
| Q8WY22     | BRI3-bindir14.3426295  | 2 | 2 | 2 | 27.8  | 9.44 | 42 | 2 |
| P32929     | Cystathioni 10.617284  | 3 | 3 | 3 | 44.5  | 6.7  | 43 | 3 |
| Q9BQC3     | 2-(3-amino-5.11247444  | 1 | 2 | 1 | 52.1  | 5.53 | 26 | 1 |
| P51003     | Poly(A) pol2.55033557  | 1 | 1 | 1 | 82.8  | 7.37 | 38 | 1 |
| AOA087X0W9 | OTU domain 4.0247678   | 1 | 1 | 1 | 37.3  | 6.74 | 79 | 1 |
| Q9NX55     | Huntingtin-20.1550388  | 1 | 1 | 1 | 14.7  | 4.93 | 49 | 1 |
| P62070     | Ras-relatec11.2745098  | 2 | 2 | 1 | 23.4  | 6.01 | 64 | 2 |
| B3KQ21     | cdNA FLJ32c5.19262982  | 3 | 3 | 3 | 70.2  | 7.46 | 31 | 3 |
| Q59G98     | TIA1 protei6.46551724  | 2 | 2 | 2 | 51.3  | 7.83 | 94 | 2 |
| O43148     | mRNA cap gt8.40336134  | 3 | 3 | 3 | 54.8  | 6.61 | 40 | 3 |
| Q8N543     | Prolyl 3-h34.98154982  | 3 | 3 | 3 | 63.2  | 5.11 | 54 | 3 |
| AOA024R5F7 | 7-dehydroct 4          | 2 | 2 | 2 | 54.5  | 8.7  | 85 | 2 |



|            |                                |   |   |   |       |       |     |   |
|------------|--------------------------------|---|---|---|-------|-------|-----|---|
| Q9Y6K9     | NF-kappa-B 10.2625298          | 3 | 3 | 3 | 48.2  | 5.71  | 21  | 3 |
| Q9BQ95     | Evolutionar 6.26450116         | 2 | 2 | 2 | 49.1  | 6.29  | 33  | 2 |
| O75629     | Protein CRF 9.54545455         | 1 | 1 | 1 | 24.1  | 7.59  | 0   | 1 |
| LOR6S1     | Alternative 10.1851852         | 1 | 3 | 1 | 11.5  | 8.48  | 22  | 1 |
| S4R3E2     | DnaJ homolog 14.4736842        | 3 | 3 | 3 | 26.6  | 5.73  | 61  | 3 |
| C9JA93     | TBC1 domain 10.0719424         | 2 | 2 | 1 | 32.1  | 8.84  | 39  | 2 |
| O00178     | GTP-binding 4.03587444         | 2 | 2 | 2 | 72.4  | 8.34  | 40  | 2 |
| Q9NX20     | 39S ribosome 10.3585657        | 2 | 2 | 2 | 28.4  | 10.13 | 37  | 2 |
| P49406     | 39S ribosome 7.87671233        | 2 | 2 | 2 | 33.5  | 9.5   | 51  | 2 |
| Q12972     | Nuclear import 9.4017094       | 2 | 2 | 2 | 38.5  | 7.37  | 0   | 2 |
| E9PMD0     | Uncharacterized 7.44047619     | 2 | 2 | 2 | 38.2  | 7.03  | 0   | 2 |
| Q03169     | Tumor necrosis 6.57492355      | 3 | 3 | 3 | 72.6  | 6.46  | 44  | 3 |
| Q6IAA8     | Regulator of 14.9068323        | 2 | 2 | 2 | 17.7  | 5.15  | 48  | 2 |
| O95139     | NADH dehydrogenase 7.8125      | 1 | 2 | 1 | 15.5  | 9.63  | 33  | 1 |
| Q7Z4H8     | KDEL motif 3.3530572           | 1 | 1 | 1 | 58.5  | 8.24  | 76  | 1 |
| Q8N7H5     | RNA polymerase 7.53295669      | 2 | 2 | 2 | 59.9  | 4.63  | 41  | 2 |
| Q9UGN5     | Poly [ADP-ribose] 5.83190395   | 2 | 2 | 2 | 66.2  | 8.88  | 58  | 2 |
| P61962     | DBP1 and 7.01754386            | 2 | 2 | 2 | 38.9  | 5.52  | 63  | 2 |
| P49770     | Translocator 3.41880342        | 1 | 1 | 1 | 39    | 6.16  | 100 | 1 |
| P78346     | Ribonuclease 17.5373134        | 3 | 3 | 3 | 29.3  | 8.91  | 32  | 3 |
| P17676     | CCAAT/enhancer 6.66666667      | 2 | 2 | 2 | 36.1  | 8.31  | 66  | 2 |
| Q9H446     | RWD domain 11.9341564          | 2 | 2 | 2 | 27.9  | 4.2   | 49  | 2 |
| Q9NP58     | ATP-binding 2.6128266          | 1 | 1 | 1 | 93.8  | 8.48  | 68  | 1 |
| Q7Z5K2     | Wings apart 3.44537815         | 2 | 2 | 2 | 132.9 | 5.44  | 24  | 2 |
| Q8IYL3     | UPF0688 protein 5.76131687     | 1 | 1 | 1 | 26    | 6.9   | 60  | 1 |
| A0A0C4DGV4 | Hepatitis F11.5606936          | 1 | 1 | 1 | 18.1  | 5.5   | 38  | 1 |
| B2RE11     | cDNA, FLJ9625                  | 3 | 3 | 3 | 18.4  | 9.44  | 16  | 3 |
| Q9BTX1     | Nucleoporin 7.12166172         | 3 | 3 | 3 | 76.3  | 9.09  | 0   | 3 |
| Q9UN37     | Vacuolar protein 6.40732265    | 2 | 3 | 1 | 48.9  | 7.8   | 39  | 2 |
| Q9Y3Q3     | Transmembrane 4.60829493       | 1 | 2 | 1 | 24.8  | 5.6   | 55  | 1 |
| Q8WTS6     | Histone-lysine 7.65027322      | 3 | 3 | 3 | 40.7  | 4.63  | 35  | 3 |
| B4DPG9     | cDNA FLJ5966.6091954           | 2 | 2 | 2 | 37.5  | 9.89  | 69  | 2 |
| Q9BVC5     | Ashwin OSF 7.32758621          | 1 | 1 | 1 | 25.8  | 9.74  | 40  | 1 |
| P36954     | DNA-directed 18.4              | 1 | 1 | 1 | 14.5  | 5.14  | 48  | 1 |
| Q53ET9     | Ariadne homolog 5.67951318     | 2 | 3 | 2 | 57.8  | 5.63  | 47  | 2 |
| O95070     | Protein YIF4.09556314          | 1 | 2 | 1 | 32    | 8.95  | 41  | 1 |
| P12074     | Cytochrome 43.1192661          | 2 | 2 | 2 | 12.1  | 9.32  | 0   | 2 |
| Q15126     | Phosphomevalonate 14.0625      | 2 | 2 | 2 | 22    | 5.73  | 54  | 2 |
| O60925     | Prefoldin subunit 17.2131148   | 2 | 2 | 2 | 14.2  | 6.81  | 40  | 2 |
| G8JLH6     | Tetraspanin 15.3508772         | 2 | 4 | 2 | 25.4  | 6.52  | 104 | 2 |
| Q15392     | Delta (24)-like 8.52713178     | 2 | 6 | 2 | 60.1  | 8.16  | 29  | 2 |
| Q2T9J0     | Peroxisomal 3.00353357         | 1 | 1 | 1 | 59.3  | 6.2   | 51  | 1 |
| Q9HCC0     | Methylcrotonyl 5.68383659      | 3 | 3 | 3 | 61.3  | 7.68  | 44  | 3 |
| Q96S66     | Chloride channel 10.3448276    | 3 | 4 | 3 | 62    | 5.55  | 59  | 3 |
| LOR6Q1     | SLC35A4 upstream 25.2427184    | 3 | 3 | 3 | 11.1  | 8.1   | 43  | 3 |
| A0A087WU03 | Heterogeneous 31.5789474       | 1 | 1 | 1 | 6.7   | 4.65  | 54  | 1 |
| Q9HD33     | 39S ribosome 7.2               | 2 | 2 | 2 | 29.4  | 10.37 | 60  | 2 |
| Q9HOX4     | Protein FA2.35507246           | 1 | 1 | 1 | 59.6  | 6.28  | 79  | 1 |
| Q6NTF9     | Rhomboid domain 4.3956044      | 1 | 1 | 1 | 39.2  | 9.32  | 44  | 1 |
| V9GYS0     | Mitochondrial 11.4583333       | 1 | 1 | 1 | 20.4  | 9.72  | 0   | 1 |
| O75794     | Cell division 7.73809524       | 3 | 3 | 3 | 39.1  | 4.81  | 52  | 3 |
| B2RE59     | cDNA, FLJ9627.02341137         | 2 | 2 | 2 | 33.6  | 8.03  | 81  | 2 |
| P18031     | Tyrosine-phosphatase 7.5862069 | 2 | 2 | 2 | 49.9  | 6.27  | 0   | 2 |
| Q9BV20     | Methylthio 6.23306233          | 2 | 2 | 2 | 39.1  | 6.3   | 44  | 2 |
| P32321     | Deoxycytidylyl 16.2921348      | 2 | 2 | 2 | 20    | 7.56  | 55  | 2 |
| BOS7P4     | cDNA, FLJ9628.52713178         | 1 | 1 | 1 | 29.4  | 9.38  | 0   | 1 |
| P78316     | Nucleolar protein 2.4504084    | 2 | 2 | 2 | 97.6  | 7.58  | 27  | 2 |
| Q9UMX5     | Neudesin O 19.1860465          | 2 | 2 | 2 | 18.8  | 5.69  | 0   | 2 |
| P49753     | Acyl-coenzyme 6.41821946       | 3 | 3 | 3 | 53.2  | 8.47  | 0   | 3 |
| Q6NXE6     | Armadillo protein 6.18762475   | 2 | 2 | 2 | 54.1  | 6.24  | 0   | 2 |
| P30047     | GTP cyclohydrolysis 30.952381  | 2 | 2 | 2 | 9.7   | 6.54  | 46  | 2 |
| Q14657     | EKC/KEOPS complex 16.0839161   | 1 | 1 | 1 | 14.8  | 8.63  | 0   | 1 |
| Q9H1E3     | Nuclear ubiquitin 4.52674897   | 2 | 3 | 2 | 27.3  | 5.08  | 58  | 2 |
| Q9BTE1     | Dynactin subunit 10.989011     | 2 | 2 | 2 | 20.1  | 8.02  | 48  | 2 |
| O60232     | Sjoegren syndrome 8.54271357   | 1 | 1 | 1 | 21.5  | 5.24  | 64  | 1 |
| Q8IXM3     | 39S ribosome 18.2481752        | 2 | 2 | 2 | 15.4  | 9.57  | 57  | 2 |
| Q8N3D4     | EH domain 10.98489823          | 1 | 1 | 1 | 161.8 | 4.83  | 76  | 1 |
| Q5VZK9     | F-actin-uncapped 1.75054705    | 2 | 2 | 2 | 151.5 | 7.85  | 42  | 2 |
| Q13445     | Transmembrane 9.25110132       | 2 | 2 | 2 | 25.2  | 4.48  | 54  | 2 |
| Q96C23     | Aldose 1-epimerase 9.35672515  | 2 | 2 | 2 | 37.7  | 6.65  | 37  | 2 |
| Q9H1A6     | RPB11a protein 30.7086614      | 2 | 2 | 2 | 14.1  | 5.87  | 0   | 2 |
| Q8N6H7     | ADP-ribosylation 12.68714012   | 1 | 1 | 1 | 56.7  | 7.99  | 75  | 1 |
| Q13136     | Liprin-alpha 2.49584027        | 3 | 3 | 2 | 135.7 | 6.29  | 33  | 3 |

|            |                        |   |   |   |       |       |    |   |
|------------|------------------------|---|---|---|-------|-------|----|---|
| Q5J7U2     | TGF beta-ir11.1538462  | 3 | 3 | 3 | 30    | 10.27 | 39 | 3 |
| Q7Z460     | CLIP-associ1.95058518  | 2 | 2 | 2 | 169.3 | 9.03  | 37 | 2 |
| AOA140VK83 | Protein phc5.27777778  | 1 | 1 | 1 | 41.5  | 4.91  | 50 | 1 |
| Q9ULR0     | Pre-mRNA-sf4.56140351  | 1 | 1 | 1 | 33    | 5.17  | 63 | 1 |
| B2R4D5     | Actin-relat16.2921348  | 3 | 3 | 3 | 20.5  | 8.59  | 54 | 3 |
| B2R4G1     | cDNA, FLJ9119.3548387  | 1 | 1 | 1 | 10.1  | 9.52  | 41 | 1 |
| Q9UNK0     | Syntaxin-8 10.5932203  | 2 | 2 | 2 | 26.9  | 4.98  | 53 | 2 |
| Q9H993     | Protein-glu11.5646259  | 3 | 3 | 3 | 51.1  | 5.76  | 0  | 3 |
| A4D0W0     | LSM8 homolc16.6666667  | 1 | 1 | 1 | 10.4  | 4.48  | 45 | 1 |
| Q15102     | Platelet-ac12.5541126  | 2 | 2 | 2 | 25.7  | 6.84  | 50 | 2 |
| O75787     | Renin recej12.5714286  | 3 | 3 | 3 | 39    | 6.1   | 28 | 3 |
| Q9P0J7     | E3 ubiquiti2.88713911  | 1 | 1 | 1 | 41.9  | 5.66  | 69 | 1 |
| Q15427     | Splicing fe3.30188679  | 1 | 1 | 1 | 44.4  | 8.56  | 75 | 1 |
| AOA0A0MTNO | Cullin-2 054.08970976  | 3 | 3 | 2 | 88.4  | 6.93  | 0  | 3 |
| O60499     | Syntaxin-1(8.43373494  | 2 | 2 | 2 | 28.1  | 4.89  | 63 | 2 |
| Q9P0J0     | NADH dehyd1 25         | 3 | 3 | 3 | 16.7  | 8.43  | 0  | 3 |
| Q9Y3P9     | Rab GTPase- 1.2160898  | 1 | 1 | 1 | 121.7 | 5.25  | 70 | 1 |
| A0JNV7     | Egf-like mc 3.5236938  | 2 | 2 | 1 | 90.4  | 6.8   | 42 | 2 |
| Q9Y3A6     | Transmembr2.17030568   | 2 | 2 | 2 | 26    | 4.84  | 79 | 2 |
| Q9BV68     | E3 ubiquiti9.81595092  | 1 | 1 | 1 | 35.6  | 5.72  | 0  | 1 |
| P42025     | Beta-centre9.57446809  | 3 | 3 | 1 | 42.3  | 6.4   | 26 | 3 |
| AOA087X256 | WASH complc2.04429302  | 2 | 2 | 2 | 136.4 | 7.44  | 34 | 2 |
| Q9H5Q4     | Dimethylad6.06060606   | 2 | 2 | 2 | 45.3  | 9.19  | 20 | 2 |
| Q99426     | Tubulin-fo19.01639344  | 2 | 2 | 2 | 27.3  | 5.15  | 64 | 2 |
| AOA075B6G3 | Dystrophin 0.5156038   | 2 | 2 | 1 | 426.5 | 5.9   | 54 | 2 |
| Q9BUL9     | Ribonuclea10.0502513   | 2 | 3 | 2 | 20.6  | 9.61  | 28 | 2 |
| Q5UIP0     | Telomere-a1.53721683   | 2 | 2 | 2 | 274.3 | 5.52  | 33 | 2 |
| Q9H0L4     | Cleavage st3.57142857  | 2 | 2 | 2 | 64.4  | 7.25  | 73 | 2 |
| Q9Y3E0     | Vesicle tra10.8695652  | 1 | 1 | 1 | 15.4  | 10.36 | 39 | 1 |
| Q8IY17     | Neuropathy 1.17130307  | 1 | 1 | 1 | 149.9 | 7.81  | 33 | 1 |
| HOYEH1     | Phosphatid12.6623377   | 2 | 2 | 1 | 32.2  | 8.31  | 47 | 2 |
| Q13206     | Probable A12.51428571  | 2 | 2 | 2 | 100.8 | 8.63  | 27 | 2 |
| Q9NQ50     | 39S ribosom7.76699029  | 1 | 1 | 1 | 24.5  | 9.63  | 36 | 1 |
| Q8TC07     | TBC1 domair3.32850941  | 2 | 2 | 1 | 79.4  | 5.67  | 34 | 2 |
| AOA0G2JHC2 | Phostensin 3.75203915  | 1 | 1 | 1 | 68    | 5.45  | 43 | 1 |
| R4GN18     | Membrane cc16.6666667  | 1 | 1 | 1 | 8.5   | 9.07  | 53 | 1 |
| Q9BSJ2     | Gamma-tubul2.66075388  | 2 | 2 | 2 | 102.5 | 6.84  | 0  | 2 |
| P19387     | DNA-directc14.1818182  | 2 | 2 | 2 | 31.4  | 4.92  | 0  | 2 |
| Q9H0U6     | 39S ribosom18.8888889  | 3 | 3 | 3 | 20.6  | 9.54  | 40 | 3 |
| O60220     | Mitochondri29.8969072  | 1 | 1 | 1 | 11    | 5.16  | 0  | 1 |
| Q9BW83     | Intraflagel18.60215054 | 1 | 1 | 1 | 20.5  | 5.41  | 89 | 1 |
| Q9H1C4     | Protein unc2.17755444  | 1 | 1 | 1 | 66.6  | 6.96  | 85 | 1 |
| H3BQK9     | Microtubulc0.30295047  | 2 | 2 | 2 | 860.5 | 5.38  | 47 | 2 |
| Q8IXT5     | RNA-bindin1 2.0979021  | 2 | 2 | 2 | 118   | 6.81  | 65 | 2 |
| Q9UHI6     | Probable A14.24757282  | 2 | 3 | 2 | 92.2  | 6.95  | 44 | 2 |
| Q13541     | Eukaryotic 10.1694915  | 1 | 1 | 1 | 12.6  | 5.48  | 72 | 1 |
| Q53HE6     | HSPC163 prc14.3884892  | 1 | 1 | 1 | 16    | 6.98  | 48 | 1 |
| B3KM43     | cDNA FLJ1013.7037037   | 1 | 1 | 1 | 68.8  | 6.13  | 60 | 1 |
| P30260     | Cell divisi4.36893204  | 2 | 2 | 2 | 91.8  | 7.02  | 32 | 2 |
| Q6KC79     | Nipped-B-1i0.96291013  | 2 | 2 | 2 | 315.9 | 7.91  | 52 | 2 |
| Q8WUX2     | Putative gl 12.5       | 2 | 2 | 2 | 20.9  | 5.43  | 51 | 2 |
| Q13887     | Kruppel-1i6.56455142   | 1 | 1 | 1 | 50.8  | 8.6   | 0  | 1 |
| Q1HDL3     | HBeAg-bindi6.68896321  | 2 | 3 | 2 | 32    | 7.62  | 91 | 2 |
| Q9Y606     | tRNA pseudc9.13348946  | 2 | 2 | 2 | 47.4  | 8.41  | 0  | 2 |
| D3DPK5     | SH3 domain 11.2840467  | 2 | 2 | 2 | 26.8  | 8.38  | 48 | 2 |
| AOA087WW40 | Endophilin-5.32994924  | 1 | 1 | 1 | 44.2  | 6.44  | 46 | 1 |
| B3KMT5     | cDNA FLJ1215.4.9689441 | 2 | 2 | 2 | 72.8  | 4.87  | 53 | 2 |
| O95295     | SNARE-assoc10.2941176  | 1 | 1 | 1 | 14.9  | 9.31  | 47 | 1 |
| O43709     | Probable 1f7.82918149  | 1 | 1 | 1 | 31.9  | 8.73  | 0  | 1 |
| Q92542     | Nicastrin (2.82087447  | 2 | 2 | 2 | 78.4  | 5.99  | 61 | 2 |
| Q9BWE0     | Replicatio2.82186949   | 1 | 1 | 1 | 63.5  | 9.98  | 84 | 1 |
| Q86TP1     | Protein prt4.63576159  | 1 | 1 | 1 | 50.2  | 5.5   | 43 | 1 |
| AOA024R9I0 | V-type prot4.97382199  | 2 | 2 | 2 | 43.9  | 7.46  | 36 | 2 |
| Q6Y1H2     | Very-long-c8.66141732  | 2 | 2 | 2 | 28.4  | 9.55  | 34 | 2 |
| Q5VTL8     | Pre-mRNA-sf4.57875458  | 2 | 2 | 2 | 64.4  | 10.54 | 19 | 2 |
| Q96CU9     | FAD-dependc8.23045267  | 2 | 2 | 2 | 53.8  | 7.78  | 56 | 2 |
| Q7L5L3     | Glycerophos4.40251572  | 1 | 1 | 1 | 36.6  | 7.97  | 38 | 1 |
| Q8WUA2     | Peptidyl-pr6.09756098  | 2 | 2 | 2 | 57.2  | 5.92  | 43 | 2 |
| Q9H900     | Protein zwia4.56852792 | 2 | 2 | 2 | 67.2  | 6.27  | 48 | 2 |
| Q9BW60     | Elongation 4.30107527  | 1 | 2 | 1 | 32.6  | 9.6   | 43 | 1 |
| AOA024R648 | Translocasc17.9775281  | 1 | 1 | 1 | 10.4  | 7.21  | 41 | 1 |
| Q13868     | Exosome con4.09556314  | 1 | 1 | 1 | 32.8  | 7.5   | 55 | 1 |
| D6RER5     | Septin-11 (6.94444444  | 3 | 4 | 1 | 49.8  | 6.68  | 69 | 3 |

|            |              |              |   |   |   |       |       |    |   |
|------------|--------------|--------------|---|---|---|-------|-------|----|---|
| P19388     | DNA-direct   | 13.8095238   | 3 | 3 | 3 | 24.5  | 5.95  | 20 | 3 |
| Q9HA77     | Probable c   | 3.19148936   | 1 | 1 | 1 | 62.2  | 8.34  | 55 | 1 |
| Q9HD45     | Transmembr   | 3.9049236    | 2 | 3 | 2 | 67.8  | 7.21  | 38 | 2 |
| AOA024R9D9 | Transcripti  | 25.7425743   | 2 | 2 | 2 | 11.5  | 9.33  | 0  | 2 |
| Q9NV88     | Integrator   | 5.16717325   | 2 | 2 | 2 | 73.8  | 6.33  | 20 | 2 |
| P14635     | G2/mitotic-  | 7.62124711   | 2 | 2 | 2 | 48.3  | 7.47  | 26 | 2 |
| Q9UNL2     | Translocon-  | 7.56756757   | 1 | 1 | 1 | 21.1  | 9.61  | 69 | 1 |
| Q9BRT6     | Protein LLI  | 17.0542636   | 1 | 3 | 1 | 15.2  | 10.37 | 60 | 1 |
| E5RFV3     | Splicing re  | 15.9090909   | 1 | 1 | 1 | 14.3  | 7.21  | 0  | 1 |
| Q12800     | Alpha-globi  | 3.58565737   | 1 | 1 | 1 | 57.2  | 5.8   | 49 | 1 |
| AOA024QYW3 | Proteolipic  | 9.86842105   | 1 | 2 | 1 | 16.7  | 7.24  | 97 | 1 |
| Q5QPA5     | 39S riboso   | 4.18250951   | 1 | 1 | 1 | 29.6  | 10.7  | 62 | 1 |
| Q8N335     | Glycerol-3-  | 9.4017094    | 3 | 3 | 3 | 38.4  | 7.02  | 72 | 3 |
| B3KN79     | cDNA FLJ13   | 6.80933852   | 2 | 2 | 2 | 59.2  | 7.87  | 66 | 2 |
| Q8NIG2     | Cap-specifi  | 3.47305389   | 3 | 3 | 3 | 95.3  | 7.05  | 30 | 3 |
| A8K489     | cDNA FLJ7    | 15.05050505  | 1 | 2 | 1 | 44.2  | 5.25  | 68 | 1 |
| Q9GZT8     | NIF3-like    | 4.77453581   | 1 | 1 | 1 | 41.9  | 6.65  | 0  | 1 |
| Q9BPW8     | Protein Nip  | 13.7323944   | 2 | 2 | 2 | 33.3  | 9.31  | 0  | 2 |
| P50135     | Histamine    | 17.87671233  | 2 | 2 | 2 | 33.3  | 5.34  | 51 | 2 |
| Q9Y315     | Deoxyribos   | 6.60377358   | 2 | 2 | 2 | 35.2  | 8.94  | 34 | 2 |
| A8K245     | cDNA FLJ7    | 5.82828283   | 3 | 3 | 3 | 45.4  | 8.91  | 37 | 3 |
| Q96DA6     | Mitochondri  | 12.0689655   | 1 | 1 | 1 | 12.5  | 10.1  | 35 | 1 |
| Q96GM8     | Target of    | 18.43137255  | 2 | 2 | 2 | 56.5  | 7.18  | 42 | 2 |
| Q8IYS1     | Peptidase    | 12.98165138  | 1 | 1 | 1 | 47.7  | 5.85  | 55 | 1 |
| Q13907     | Isopentenyl  | 7.92951542   | 2 | 2 | 2 | 26.3  | 6.34  | 41 | 2 |
| H0UI80     | Negative el  | 5.00834725   | 2 | 2 | 2 | 67.3  | 5.21  | 48 | 2 |
| Q9UJK0     | Ribosome b   | 3.52564103   | 1 | 1 | 1 | 33.6  | 6.87  | 55 | 1 |
| Q96JJ7     | Protein di   | 5.50660793   | 2 | 2 | 2 | 51.8  | 4.91  | 49 | 2 |
| P15408     | Fos-relate   | 5.21472393   | 1 | 1 | 1 | 35.2  | 7.49  | 0  | 1 |
| B4DX14     | cDNA FLJ5    | 2.6.78571429 | 1 | 1 | 1 | 30.6  | 10.46 | 54 | 1 |
| HOY5K5     | Endoplasmic  | 5.54156171   | 2 | 2 | 2 | 44.6  | 6.47  | 50 | 2 |
| Q5TDF0     | Cancer-rel   | 12.7192982   | 2 | 2 | 2 | 25.1  | 9.42  | 37 | 2 |
| Q96JP5     | E3 ubiquiti  | 5.96491228   | 2 | 2 | 2 | 63.4  | 7.36  | 0  | 2 |
| AOA0C4DFX9 | Negative el  | 1.85528757   | 1 | 1 | 1 | 58.5  | 9.26  | 64 | 1 |
| Q9UBW8     | COP9 signa   | 5.09090909   | 1 | 1 | 1 | 30.3  | 8.22  | 72 | 1 |
| Q5EBM2     | Uncharacter  | 4.04624277   | 2 | 6 | 2 | 56.8  | 6.86  | 43 | 2 |
| P61024     | Cyclin-depe  | 53.164557    | 2 | 2 | 2 | 9.7   | 8.94  | 0  | 2 |
| B4DZK0     | Cysteine p   | 5.68627451   | 2 | 2 | 2 | 57.3  | 8.53  | 0  | 2 |
| Q9NP77     | RNA polyme   | 4.63917526   | 1 | 2 | 1 | 22.6  | 5.33  | 0  | 1 |
| Q5TH30     | NDRG famil   | 3.86597938   | 1 | 1 | 1 | 42.8  | 5.33  | 50 | 1 |
| P07686     | Beta-hexos   | 3.77697842   | 1 | 1 | 1 | 63.1  | 6.76  | 0  | 1 |
| J3KNN3     | Phosphoryl   | 4.14634146   | 1 | 1 | 1 | 46.9  | 6.38  | 34 | 1 |
| Q92520     | Protein FA   | 5.28634361   | 1 | 1 | 1 | 24.7  | 8.29  | 86 | 1 |
| O00186     | Syntaxin-b   | 3.20945946   | 2 | 2 | 2 | 67.7  | 7.8   | 29 | 2 |
| P78362     | SRSF prote   | 3.05232558   | 2 | 2 | 1 | 77.5  | 4.97  | 39 | 2 |
| AOA0S2Z5P2 | GINS compl   | 6.66666667   | 2 | 2 | 2 | 28.8  | 5.24  | 36 | 2 |
| Q9BUN8     | Derlin-1     | 0.7.56972112 | 2 | 2 | 2 | 28.8  | 9.51  | 44 | 2 |
| Q9NW82     | WD repeat-   | 3.51681957   | 2 | 2 | 2 | 73.2  | 6.33  | 59 | 2 |
| Q9NPJ3     | Acyl-coenz   | 14.2857143   | 2 | 2 | 2 | 15    | 9.14  | 51 | 2 |
| Q9NVI1     | Fanconi an   | 2.10843373   | 2 | 2 | 2 | 149.2 | 6.74  | 50 | 2 |
| Q7Z7A3     | Cytoplasmic  | 3.44827586   | 1 | 1 | 1 | 36.4  | 9.2   | 36 | 1 |
| P78310     | Coxsackiev   | 7.12328767   | 2 | 2 | 2 | 40    | 7.56  | 0  | 2 |
| Q8NBL1     | Protein O-   | 3.57142857   | 1 | 1 | 1 | 46.2  | 8.72  | 67 | 1 |
| Q9H7D7     | WD repeat-   | 2.57186082   | 2 | 2 | 2 | 72.1  | 6.16  | 51 | 2 |
| Q9H9T3     | Elongator    | 3.29067642   | 2 | 2 | 2 | 62.2  | 8.88  | 46 | 2 |
| Q9UI09     | NADH dehyd   | 14.4827586   | 2 | 2 | 2 | 17.1  | 9.63  | 55 | 2 |
| Q13330     | Metastasis   | -6.15384615  | 3 | 3 | 1 | 80.7  | 9.26  | 58 | 3 |
| Q9NVM6     | DnaJ homol   | 4.60526316   | 1 | 2 | 1 | 34.7  | 8.53  | 0  | 1 |
| Q969G6     | Riboflavin   | 7.09677419   | 1 | 1 | 1 | 17.6  | 8.13  | 91 | 1 |
| Q95989     | Diphosphoi   | 9.88372093   | 1 | 1 | 1 | 19.5  | 6.34  | 0  | 1 |
| Q96DV4     | 39S riboso   | 4.73684211   | 2 | 3 | 2 | 44.6  | 7.53  | 79 | 2 |
| Q95785     | Protein Wiz  | 1.21138704   | 1 | 1 | 1 | 178.6 | 6.86  | 0  | 1 |
| Q5SNT2     | Transmembr   | 1.5015015    | 1 | 1 | 1 | 72.2  | 9.22  | 86 | 1 |
| Q99707     | Methionine   | 2.45059289   | 2 | 2 | 2 | 140.4 | 5.58  | 0  | 2 |
| Q9Y5Q9     | General tr   | 1.58013544   | 1 | 1 | 1 | 101.2 | 5.07  | 63 | 1 |
| Q5T5H1     | Alpha-end    | 11.7647059   | 2 | 2 | 1 | 21    | 7.87  | 46 | 2 |
| AOA024QZE9 | Uncharacter  | 4.82758621   | 1 | 1 | 1 | 32.4  | 5.07  | 49 | 1 |
| O00165     | HCLS1-ass    | 9.67741935   | 2 | 3 | 2 | 31.6  | 4.92  | 35 | 2 |
| P11117     | Lysosomal    | 4.96453901   | 2 | 2 | 2 | 48.3  | 6.74  | 29 | 2 |
| Q8NEF9     | Serum resp   | 6.75990676   | 2 | 2 | 2 | 48.6  | 9.58  | 0  | 2 |
| B5BU18     | Dual specifi | 16.7567568   | 2 | 2 | 2 | 20.6  | 8.15  | 42 | 2 |
| B2R6D8     | CDC42 effec  | 7.02247191   | 3 | 3 | 3 | 38    | 5.19  | 31 | 3 |
| E9PJ55     | T-complex    | 1.01680672   | 1 | 1 | 1 | 67.2  | 6.44  | 39 | 1 |

|            |                       |   |   |   |       |       |    |   |
|------------|-----------------------|---|---|---|-------|-------|----|---|
| Q9H7E9     | UPF0488 prc6.98689956 | 1 | 2 | 1 | 25    | 9.95  | 57 | 1 |
| O60885     | Bromodomair1.24816446 | 2 | 2 | 2 | 152.1 | 9.19  | 35 | 2 |
| Q59EB2     | Putative ur3.92967942 | 2 | 2 | 2 | 109.5 | 7.33  | 0  | 2 |
| AOA0U4CQG9 | Putative v-3.32640333 | 1 | 1 | 1 | 55.7  | 6.37  | 57 | 1 |
| Q53FA7     | Quinone oxi6.62650602 | 1 | 2 | 1 | 35.5  | 7.17  | 31 | 1 |
| Q9BS40     | Latexin OS-8.10810811 | 1 | 1 | 1 | 25.7  | 5.78  | 57 | 1 |
| AOA0AOMS52 | Calcium/cal7.97773655 | 2 | 2 | 2 | 60.2  | 7.3   | 0  | 2 |
| A8MWD9     | Putative su17.1052632 | 1 | 1 | 1 | 8.5   | 8.84  | 68 | 1 |
| B2R4A2     | Cytochrome 11.7117117 | 1 | 1 | 1 | 13.5  | 8.27  | 51 | 1 |
| Q9H9Y6     | DNA-directe2.90748899 | 2 | 2 | 2 | 128.1 | 7.83  | 0  | 2 |
| Q5T160     | Probable ai2.07612457 | 1 | 1 | 1 | 65.5  | 8.21  | 58 | 1 |
| Q9Y3C0     | WASH comple9.27835052 | 1 | 1 | 1 | 21.2  | 4.46  | 50 | 1 |
| B2RB47     | AMP deamin2.3890785   | 2 | 2 | 2 | 100.7 | 6.93  | 32 | 2 |
| P50583     | Bis(5'-nucl16.3265306 | 1 | 1 | 1 | 16.8  | 5.35  | 0  | 1 |
| P61960     | Ubiquitin-117.6470588 | 1 | 1 | 1 | 9.1   | 9.31  | 33 | 1 |
| Q9H9L3     | Interferon-7.08215297 | 2 | 3 | 2 | 39.1  | 9.94  | 0  | 2 |
| Q9NXR7     | BRCA1-A con7.31070496 | 2 | 2 | 2 | 43.5  | 5.81  | 48 | 2 |
| Q6UVK1     | Chondroitir0.94745909 | 2 | 2 | 2 | 250.4 | 5.47  | 52 | 2 |
| Q86X83     | COMM domair13.0653266 | 2 | 2 | 2 | 22.7  | 6.73  | 43 | 2 |
| Q9P2N5     | RNA-binding1.98113208 | 2 | 2 | 2 | 118.6 | 9.19  | 37 | 2 |
| AOA024R8V6 | Ubiquitin :3.47284061 | 2 | 2 | 2 | 122.8 | 9.7   | 0  | 2 |
| Q32Q10     | RSU1 protei11.7857143 | 3 | 3 | 3 | 31.3  | 9.09  | 0  | 3 |
| Q9BT22     | Chitobiosyl3.87931034 | 2 | 2 | 2 | 52.5  | 7.23  | 50 | 2 |
| Q8WZA0     | Protein LZ110.5263158 | 2 | 2 | 2 | 21.5  | 4.94  | 0  | 2 |
| Q59GG2     | Caspase 9 i4.16666667 | 1 | 2 | 1 | 50.1  | 6.23  | 0  | 1 |
| Q96JH7     | Deubiquitir1.96399345 | 2 | 2 | 2 | 134.2 | 7.2   | 44 | 2 |
| O43493     | Trans-Golgi7.08333333 | 2 | 2 | 2 | 51.1  | 5.73  | 31 | 2 |
| O75152     | Zinc finger2.22222222 | 2 | 2 | 2 | 89.1  | 8.37  | 52 | 2 |
| Q16740     | ATP-depend12.2743682  | 1 | 1 | 1 | 30.2  | 8.09  | 0  | 1 |
| P82914     | 28S riboson7.39299611 | 2 | 2 | 2 | 29.8  | 10.48 | 0  | 2 |
| AOA0S2Z577 | Vacuolar pi5.34846029 | 2 | 2 | 2 | 70.5  | 6.71  | 32 | 2 |
| Q13618     | Cullin-3 O2.47395833  | 2 | 2 | 2 | 88.9  | 8.48  | 59 | 2 |
| Q61N84     | rRNA methyl11.0481586 | 3 | 3 | 3 | 38.6  | 7.94  | 0  | 3 |
| Q10589     | Bone marrow 10        | 2 | 2 | 2 | 19.8  | 5.6   | 31 | 2 |
| Q05655     | Protein kir1.77514793 | 1 | 1 | 1 | 77.5  | 7.75  | 45 | 1 |
| H7C3C4     | Anion exche2.62172285 | 2 | 2 | 1 | 89.8  | 7.69  | 64 | 2 |
| P10644     | cAMP-depend3.1496063  | 1 | 1 | 1 | 43    | 5.35  | 74 | 1 |
| AOA024R6R1 | SHC SH2-don3.57142857 | 1 | 1 | 1 | 75.6  | 4.75  | 0  | 1 |
| Q81Y37     | Probable A11.03716508 | 1 | 1 | 1 | 129.5 | 8.1   | 0  | 1 |
| Q12765     | Secernin-1 3.14009662 | 1 | 1 | 1 | 46.4  | 4.75  | 59 | 1 |
| P15529     | Membrane cc6.37755102 | 2 | 2 | 2 | 43.7  | 6.74  | 0  | 2 |
| Q92733     | Proline-ric3.46232179 | 2 | 2 | 2 | 52.4  | 5.1   | 24 | 2 |
| A8K8N5     | cDNA FLJ7661.52057245 | 1 | 1 | 1 | 127.4 | 8.56  | 53 | 1 |
| AOA024R419 | KIAA0971, i 2.3943662 | 1 | 1 | 1 | 81.4  | 8.05  | 43 | 1 |
| Q6PJT7     | Zinc finger5.02717391 | 3 | 3 | 3 | 82.8  | 7.31  | 56 | 3 |
| O43715     | TP53-regul17.1052632  | 1 | 1 | 1 | 8.8   | 5.48  | 42 | 1 |
| B3KNB9     | cDNA FLJ1412.92397661 | 1 | 1 | 1 | 75.4  | 6.61  | 0  | 1 |
| AOA0S2Z570 | Retinoid X 4.283054   | 2 | 2 | 2 | 57.3  | 8.27  | 35 | 2 |
| D6RAT4     | Cellular nt 14.159292 | 1 | 1 | 1 | 12.2  | 8.21  | 40 | 1 |
| Q53H37     | Calmodulin- 9.5890411 | 1 | 1 | 1 | 15.9  | 4.44  | 37 | 1 |
| Q2MIJ6     | Oxidase (C)4.03225806 | 2 | 2 | 2 | 55.3  | 9.69  | 0  | 2 |
| I3L1X0     | L-fucose ki13.4615385 | 1 | 1 | 1 | 17.1  | 4.88  | 0  | 1 |
| Q59FM4     | Scavenger r3.44234079 | 2 | 2 | 2 | 64.1  | 8.54  | 34 | 2 |
| Q53XC6     | Full-length 3.926097  | 1 | 1 | 1 | 49.4  | 6.55  | 50 | 1 |
| Q8TDB6     | E3 ubiquiti2.16216216 | 1 | 1 | 1 | 83.5  | 8.06  | 42 | 1 |
| Q08AF3     | Schlafen fe3.36700337 | 2 | 2 | 2 | 101   | 8.22  | 40 | 2 |
| O14910     | Protein lir6.86695279 | 1 | 1 | 1 | 26    | 8.72  | 63 | 1 |
| O75446     | Histone de2.18181818  | 1 | 1 | 1 | 23.3  | 9.17  | 53 | 1 |
| AOA0J9YXC7 | LIM and ser3.01507538 | 1 | 1 | 1 | 45.7  | 7.88  | 39 | 1 |
| P17544     | Cyclic AMP-7.89473684 | 2 | 2 | 2 | 52.9  | 8.65  | 0  | 2 |
| Q9UPN7     | Serine/thre2.83768445 | 1 | 1 | 1 | 96.7  | 4.55  | 0  | 1 |
| Q9ULC3     | Ras-relate8.01687764  | 1 | 1 | 1 | 26.6  | 6.6   | 48 | 1 |
| B7ZB52     | cDNA, FLJ76.94444444  | 1 | 1 | 1 | 17    | 5.19  | 44 | 1 |
| AOA024RAM2 | Glutaredoxi22.6415094 | 2 | 2 | 2 | 11.8  | 8.09  | 37 | 2 |
| E5RJR5     | S-phase kir12.2699387 | 2 | 2 | 2 | 18.7  | 4.7   | 41 | 2 |
| O15514     | DNA-directe 14.084507 | 1 | 1 | 1 | 16.3  | 4.79  | 40 | 1 |
| AOA0AOMT33 | Protein SC/1.03780578 | 1 | 1 | 1 | 148.8 | 9.06  | 54 | 1 |
| J3KNQ4     | Alpha-parvi6.55339806 | 2 | 2 | 2 | 46.6  | 8.4   | 44 | 2 |
| Q5JSZ5     | Protein PR1.03185285  | 2 | 2 | 2 | 242.8 | 8.34  | 18 | 2 |
| B2RD09     | cDNA, FLJ96.43776824  | 2 | 2 | 2 | 50.4  | 9.03  | 0  | 2 |
| AOA024RACO | Leucine zip1.76579926 | 1 | 1 | 1 | 120.2 | 8.63  | 0  | 1 |
| A8K3Z5     | Nucleoporin 3.6809816 | 1 | 1 | 1 | 34.8  | 9.36  | 73 | 1 |
| Q9NW64     | Pre-mRNA-sr3.80952381 | 1 | 1 | 1 | 46.9  | 8.54  | 61 | 1 |

|            |                        |   |   |   |       |       |    |   |
|------------|------------------------|---|---|---|-------|-------|----|---|
| A8K6M4     | cdNA FLJ7579.48275862  | 2 | 2 | 2 | 26.7  | 8.79  | 43 | 2 |
| Q69YN4     | Protein vi0.66225166   | 1 | 1 | 1 | 201.9 | 5.01  | 43 | 1 |
| Q8IX18     | Probable A11.66880616  | 1 | 1 | 1 | 88.5  | 8.65  | 38 | 1 |
| J3QRU1     | Tyrosine-pt5.10948905  | 3 | 3 | 1 | 61.3  | 6.57  | 59 | 3 |
| Q9H6T3     | RNA polymer 2.2556391  | 1 | 1 | 1 | 75.7  | 6.84  | 51 | 1 |
| Q14790     | Caspase-8 (6.47181628  | 2 | 2 | 2 | 55.4  | 5.1   | 40 | 2 |
| A4LAA3     | Alpha thal0.48154093   | 1 | 1 | 1 | 282.4 | 6.55  | 65 | 1 |
| Q95155     | Ubiquitin c2.91858679  | 2 | 2 | 2 | 146.1 | 6.55  | 35 | 2 |
| A3F768     | NF-kappaB r3.91304348  | 2 | 2 | 2 | 77.5  | 8.73  | 29 | 2 |
| AOA087WZV9 | D-tyrosyl-15.38116592  | 1 | 1 | 1 | 25.3  | 9.04  | 56 | 1 |
| Q92506     | Estradiol 14.98084291  | 1 | 1 | 1 | 27    | 6.54  | 55 | 1 |
| Q95168     | NADH dehyd17.0542636   | 2 | 2 | 2 | 15.2  | 9.85  | 31 | 2 |
| V9HWD3     | Epididymis 4.76190476  | 1 | 1 | 1 | 54.8  | 6.28  | 0  | 1 |
| AOA024R6A5 | Protein phc2.87958115  | 1 | 1 | 1 | 42.4  | 5.36  | 0  | 1 |
| P05109     | Protein S1C 11.827957  | 1 | 1 | 1 | 10.8  | 7.03  | 58 | 1 |
| Q7KZ85     | Transcripti1.56431054  | 2 | 2 | 2 | 198.9 | 4.91  | 0  | 2 |
| Q9NV56     | MRG/MORF4L-6.37254902  | 1 | 1 | 1 | 22.4  | 5.83  | 60 | 1 |
| O00220     | Tumor necrc2.77777778  | 1 | 1 | 1 | 50.1  | 7.03  | 54 | 1 |
| Q16763     | Ubiquitin-c6.75675676  | 1 | 1 | 1 | 23.8  | 8.38  | 22 | 1 |
| Q9UBB6     | Neurochondi2.19478738  | 1 | 1 | 1 | 78.8  | 5.48  | 0  | 1 |
| Q9UJA5     | tRNA (adeni2.81690141  | 1 | 1 | 1 | 55.8  | 7.55  | 63 | 1 |
| Q8WVMO     | Dimethylad0.4624277    | 1 | 1 | 1 | 39.5  | 9.26  | 47 | 1 |
| AOA0B4J1V9 | Helicase, 12.26244344  | 2 | 2 | 2 | 102.7 | 7.65  | 41 | 2 |
| B4DMM7     | cdNA FLJ597 3.4904014  | 2 | 2 | 2 | 63.3  | 5.2   | 26 | 2 |
| A8K5R6     | Golgi SNAP 5.2         | 1 | 1 | 1 | 28.6  | 9.42  | 44 | 1 |
| LOR588     | Alternative10.0628931  | 2 | 2 | 2 | 18.4  | 11.3  | 40 | 2 |
| Q8N5M9     | Protein jac6.55737705  | 1 | 1 | 1 | 21.1  | 9.73  | 39 | 1 |
| Q96I25     | Splicing fe4.98753117  | 2 | 2 | 2 | 44.9  | 5.97  | 39 | 2 |
| Q9HAF1     | Chromatin n7.32984293  | 1 | 1 | 1 | 21.6  | 9.32  | 0  | 1 |
| Q92504     | Zinc trans2.98507463   | 1 | 1 | 1 | 50.1  | 6.87  | 0  | 1 |
| Q75208     | Ubiquinone 9.43396226  | 2 | 2 | 2 | 35.5  | 5.94  | 30 | 2 |
| Q14562     | Ubiquitin c5.82524272  | 1 | 1 | 1 | 33.4  | 5.77  | 54 | 1 |
| Q12846     | Syntaxin-4 3.7037037   | 1 | 2 | 1 | 34.2  | 6.28  | 0  | 1 |
| P60604     | Ubiquitin-c 9.6969697  | 2 | 2 | 2 | 18.6  | 4.7   | 55 | 2 |
| Q14TF0     | Glutamate-c2.51177394  | 1 | 1 | 1 | 72.7  | 6.09  | 0  | 1 |
| Q2M2I5     | Keratin, t3.04761905   | 2 | 2 | 1 | 55.1  | 4.96  | 76 | 2 |
| Q8WZ82     | Esterase O19.25110132  | 2 | 2 | 2 | 24.4  | 6.89  | 39 | 2 |
| A8K727     | Pleckstrin 2.58823529  | 1 | 1 | 1 | 47.2  | 8.66  | 46 | 1 |
| Q9UJ70     | N-acetyl-D-6.39534884  | 2 | 2 | 2 | 37.4  | 6.24  | 40 | 2 |
| P52655     | Transcripti2.92553191  | 1 | 1 | 1 | 41.5  | 4.55  | 64 | 1 |
| Q9H3G5     | Probable sc3.36134454  | 1 | 1 | 1 | 54.1  | 5.62  | 34 | 1 |
| AOA0AOMSG2 | Four and a 3.29113924  | 1 | 1 | 1 | 44.8  | 8.06  | 0  | 1 |
| Q7Z3T8     | Zinc finger0.90968161  | 1 | 1 | 1 | 168.8 | 4.82  | 52 | 1 |
| Q59G13     | Syntaxin 1c2.61096606  | 2 | 2 | 2 | 43.3  | 7.11  | 48 | 2 |
| X5D2I6     | G protein-c2.62582057  | 1 | 1 | 1 | 53.1  | 9.28  | 45 | 1 |
| B8ZZ87     | Mitotic-spi5.96330275  | 1 | 1 | 1 | 22.3  | 10.15 | 63 | 1 |
| Q9BTZ2     | Dehydrogen7.55395683   | 2 | 2 | 2 | 29.5  | 8.56  | 28 | 2 |
| AOA0C4DGZ1 | Zinc finger5.72390572  | 1 | 1 | 1 | 34.3  | 8.37  | 50 | 1 |
| P22830     | Ferrochelate3.54609929 | 1 | 1 | 1 | 47.8  | 8.73  | 0  | 1 |
| C9JF17     | Apolipoprot9.30232558  | 2 | 5 | 2 | 24.1  | 5.6   | 72 | 2 |
| Q9BSH4     | Translatior4.04040404  | 1 | 1 | 1 | 32.5  | 8.13  | 0  | 1 |
| Q13425     | Beta-2-synt1.66666667  | 1 | 1 | 1 | 57.9  | 8.82  | 75 | 1 |
| AOA087WYF7 | MICOS compl4.47761194  | 1 | 1 | 1 | 29.2  | 9.45  | 46 | 1 |
| Q96KP1     | Exocyst con2.92207792  | 2 | 2 | 2 | 104   | 6.9   | 28 | 2 |
| Q9Y6M0     | Testisin O4.14012739   | 1 | 1 | 1 | 34.9  | 7.62  | 45 | 1 |
| AOA1BOGTU4 | Paxillin O1.20259019   | 1 | 1 | 1 | 115.8 | 5.64  | 45 | 1 |
| Q9UH65     | Switch-assc2.73504274  | 1 | 1 | 1 | 69    | 5.87  | 0  | 1 |
| D6RBT3     | NADH dehyd8.72093023   | 1 | 1 | 1 | 18.7  | 8.72  | 63 | 1 |
| Q8NC42     | E3 ubiquiti 6.25       | 1 | 1 | 1 | 43.1  | 6.54  | 42 | 1 |
| Q92615     | La-related 2.98102981  | 1 | 1 | 1 | 80.5  | 6.92  | 0  | 1 |
| Q14789     | Golgin sub10.58300092  | 1 | 1 | 1 | 375.8 | 5     | 0  | 1 |
| P29084     | Transcripti5.15463918  | 2 | 2 | 2 | 33    | 9.66  | 40 | 2 |
| AOA087WWS1 | THO complex3.34855403  | 2 | 2 | 2 | 75.6  | 4.98  | 28 | 2 |
| Q43823     | A-kinase ar3.46820809  | 2 | 2 | 2 | 76.1  | 5.15  | 25 | 2 |
| Q9HOR4     | Haloacid de5.01930502  | 1 | 1 | 1 | 28.5  | 6.24  | 44 | 1 |
| Q8N556     | Actin filan2.46575342  | 2 | 2 | 2 | 80.7  | 8.68  | 40 | 2 |
| P53367     | Arfaptin-1 7.77479893  | 2 | 2 | 1 | 41.7  | 6.7   | 0  | 2 |
| Q8NCR1     | VPS53 prote 9.375      | 1 | 1 | 1 | 14.3  | 9.74  | 59 | 1 |
| Q7Z7F7     | 39S ribosom 12.5       | 1 | 1 | 1 | 15.1  | 11.15 | 43 | 1 |
| Q13131     | 5'-AMP-acti 3.0411449  | 1 | 1 | 1 | 64    | 8.12  | 46 | 1 |
| Q9NX18     | Succinate c8.43373494  | 1 | 1 | 1 | 19.6  | 6.8   | 32 | 1 |
| Q9ULX6     | A-kinase ar 2.0123839  | 1 | 1 | 1 | 71.6  | 5.07  | 0  | 1 |
| J3KPZ4     | Nuclear nuc5.55555556  | 1 | 2 | 1 | 20.1  | 8.06  | 42 | 1 |

|            |                        |   |   |   |       |       |    |   |
|------------|------------------------|---|---|---|-------|-------|----|---|
| Q9NWM8     | Peptidyl-p10.4265403   | 2 | 2 | 2 | 24.2  | 6.07  | 20 | 2 |
| A0A0C4DG49 | Poliovirus 5.99520384  | 2 | 2 | 2 | 45.3  | 6.52  | 50 | 2 |
| Q9UBD5     | Origin recc1.68776371  | 1 | 1 | 1 | 82.2  | 7.61  | 57 | 1 |
| Q9UFC0     | Leucine-ric4.01854714  | 2 | 2 | 2 | 70.8  | 7.21  | 35 | 2 |
| Q59FU8     | Tumor necrc 4.4198895  | 1 | 1 | 1 | 40.5  | 8.1   | 0  | 1 |
| B2RBX8     | cDNA, FLJ9f5.34979424  | 1 | 1 | 1 | 28.7  | 8.28  | 40 | 1 |
| A0A024R1X3 | Vacuolar pi10.2272727  | 2 | 2 | 2 | 20.7  | 6.34  | 0  | 2 |
| P17568     | NADH dehydi13.8686131  | 2 | 2 | 2 | 16.4  | 8.92  | 0  | 2 |
| Q9NYV4     | Cyclin-depe1.20805369  | 2 | 2 | 1 | 164.1 | 9.44  | 55 | 2 |
| Q86TU7     | Histone-lys6.22895623  | 3 | 3 | 2 | 67.2  | 5.96  | 36 | 3 |
| B4DNC0     | cDNA FLJ6114.74452555  | 1 | 1 | 1 | 30.6  | 8.37  | 35 | 1 |
| Q9NQW6     | Anillin OS-2.84697509  | 3 | 3 | 3 | 124.1 | 8.07  | 39 | 3 |
| A0A096LP25 | AP2-associ3.52250489   | 1 | 1 | 1 | 54.4  | 5.12  | 34 | 1 |
| Q4KMP7     | TBC1 domair 2.5990099  | 1 | 1 | 1 | 87.1  | 9.19  | 17 | 1 |
| B3KRQ2     | cDNA FLJ34f1.57480315  | 2 | 2 | 2 | 130.9 | 6.87  | 41 | 2 |
| A0A0S2Z5C9 | Putative tf5.34124629  | 1 | 1 | 1 | 36.9  | 6.3   | 49 | 1 |
| Q8N9T8     | Protein KR11.99146515  | 1 | 1 | 1 | 82.5  | 5.14  | 61 | 1 |
| Q8LZ73     | RNA pseudot3.85321101  | 1 | 1 | 1 | 61.3  | 7.17  | 0  | 1 |
| Q96T23     | Remodeling 0.90215128  | 1 | 1 | 1 | 163.7 | 5.01  | 36 | 1 |
| Q9C0J8     | pre-mRNA 3'1.27245509  | 2 | 2 | 1 | 145.8 | 9.17  | 43 | 2 |
| Q8TDB8     | Solute carri3.07692308 | 2 | 2 | 2 | 56.3  | 7.83  | 37 | 2 |
| Q8TBQ9     | Protein kis 25         | 2 | 2 | 2 | 8.1   | 8.95  | 45 | 2 |
| B4DKM0     | cDNA FLJ51f4.26666667  | 2 | 2 | 2 | 41.6  | 9.58  | 56 | 2 |
| Q9Y508     | E3 ubiquiti5.26315789  | 1 | 1 | 1 | 25.7  | 7.25  | 46 | 1 |
| P29353     | SHC-transfc4.80274443  | 2 | 2 | 2 | 62.8  | 6.44  | 44 | 2 |
| Q96GA3     | Protein LTV 4          | 1 | 1 | 1 | 54.8  | 4.91  | 45 | 1 |
| G9FP35     | Guanine nuc8.63509749  | 2 | 2 | 2 | 42.1  | 5.68  | 49 | 2 |
| Q8N4H5     | Mitochondri43.1372549  | 3 | 3 | 3 | 6     | 9.7   | 44 | 3 |
| P53801     | Pituitary t6.66666667  | 1 | 1 | 1 | 20.3  | 8.79  | 19 | 1 |
| Q5U5X0     | Complex III14.4230769  | 1 | 1 | 1 | 11.9  | 9.66  | 0  | 1 |
| Q8WW01     | tRNA-splici13.4502924  | 1 | 1 | 1 | 18.6  | 4.58  | 0  | 1 |
| Q9BRZ2     | E3 ubiquiti2.38410596  | 1 | 1 | 1 | 81.4  | 7.74  | 0  | 1 |
| Q5K651     | Sterile al1.57331655   | 2 | 2 | 2 | 184.2 | 7.83  | 37 | 2 |
| A4D1E9     | GTP-binding6.71834625  | 2 | 2 | 2 | 42.9  | 9.03  | 0  | 2 |
| Q14118     | Dystroglyce1.34078212  | 1 | 1 | 1 | 97.4  | 8.56  | 35 | 1 |
| Q14119     | Vascular er3.64683301  | 2 | 2 | 1 | 56.9  | 9.52  | 0  | 2 |
| J3KN01     | Afadin OS=0.70999454   | 1 | 1 | 1 | 207.5 | 6.37  | 37 | 1 |
| Q9UPU5     | Ubiquitin c0.64885496  | 1 | 1 | 1 | 294.2 | 6.14  | 80 | 1 |
| Q96ME1     | F-box/LRR-12.36024845  | 1 | 1 | 1 | 88.3  | 8.32  | 64 | 1 |
| Q96HW7     | Integrator 2.18068536  | 2 | 2 | 2 | 108.1 | 6.44  | 51 | 2 |
| Q8WWQ0     | PH-interact1.92202087  | 2 | 2 | 2 | 206.6 | 8.85  | 38 | 2 |
| P09914     | Interferon-4.81171548  | 2 | 2 | 2 | 55.3  | 7.2   | 19 | 2 |
| A4D0P7     | Origin recc 3.2183908  | 1 | 1 | 1 | 50.3  | 7.74  | 49 | 1 |
| Q9BZJ0     | Crooked nec 1.6509434  | 1 | 1 | 1 | 100.4 | 8     | 44 | 1 |
| Q08209     | Serine/thre3.83877159  | 2 | 3 | 1 | 58.7  | 5.86  | 51 | 2 |
| B2R4I8     | cDNA, FLJ9f9.32642487  | 2 | 2 | 2 | 21.7  | 5.39  | 40 | 2 |
| Q9UKZ1     | CCR4-NOT tr7.05882353  | 2 | 2 | 2 | 55.2  | 6.4   | 36 | 2 |
| Q8NE91     | TM4SF1 prot3.87931034  | 1 | 1 | 1 | 25    | 6.37  | 52 | 1 |
| 014936     | Peripheral 2.4838013   | 2 | 2 | 2 | 105.1 | 6.43  | 0  | 2 |
| J3KQ41     | COP9 signal6.83453237  | 1 | 1 | 1 | 31.5  | 8     | 0  | 1 |
| 043760     | Synaptogyri4.46428571  | 1 | 1 | 1 | 24.8  | 4.94  | 51 | 1 |
| 094842     | TOX high mc1.61030596  | 1 | 1 | 1 | 66.2  | 5.06  | 38 | 1 |
| P62891     | 60S riboson23.5294118  | 2 | 3 | 2 | 6.4   | 12.56 | 54 | 2 |
| Q7LBC6     | Lysine-spec1.59000568  | 2 | 2 | 2 | 191.5 | 7.18  | 33 | 2 |
| Q9H9A5     | CCR4-NOT tr1.34408602  | 1 | 1 | 1 | 82.3  | 7.78  | 54 | 1 |
| H3BM91     | COMM domair9.00473934  | 1 | 1 | 1 | 22.7  | 7.9   | 0  | 1 |
| Q96DH6     | RNA-binding4.57317073  | 1 | 1 | 1 | 35.2  | 8.48  | 0  | 1 |
| Q6PCE3     | Glucose 1,6f1.76848875 | 1 | 1 | 1 | 70.4  | 7.15  | 0  | 1 |
| Q8IV08     | Phospholipe4.28571429  | 2 | 2 | 2 | 54.7  | 6.47  | 41 | 2 |
| Q14432     | cGMP-inhibi1.66520596  | 1 | 1 | 1 | 124.9 | 6     | 18 | 1 |
| Q01970     | l-phosphati2.43111831  | 2 | 2 | 2 | 138.7 | 5.9   | 0  | 2 |
| Q81WT6     | Volume-regt 1.2345679  | 1 | 1 | 1 | 94.1  | 7.94  | 54 | 1 |
| Q9Y3B9     | RRP15-like 3.90070922  | 1 | 1 | 1 | 31.5  | 5.52  | 63 | 1 |
| B2RCM6     | cDNA, FLJ9f7.11462451  | 1 | 1 | 1 | 28.2  | 9.54  | 0  | 1 |
| Q15006     | ER membran6.4040404    | 1 | 1 | 1 | 34.8  | 6.57  | 56 | 1 |
| P49459     | Ubiquitin-c6.57894737  | 1 | 1 | 1 | 17.3  | 5.15  | 59 | 1 |
| F5GXR3     | Parathymosi10.5769231  | 1 | 2 | 1 | 12.1  | 11    | 76 | 1 |
| Q6AI08     | HEAT repeat1.35478408  | 1 | 1 | 1 | 128.7 | 7.03  | 57 | 1 |
| Q6UXH1     | Cysteine-rj 4.5325779  | 1 | 1 | 1 | 38.2  | 4.59  | 50 | 1 |
| Q9HCY8     | Protein S1(10.5769231  | 1 | 1 | 1 | 11.7  | 5.24  | 49 | 1 |
| A8K4B4     | cDNA FLJ78f5.66893424  | 2 | 2 | 2 | 49.4  | 9.89  | 37 | 2 |
| Q6FHY4     | N-ethylmalc3.20512821  | 1 | 1 | 1 | 34.7  | 5.41  | 44 | 1 |
| Q4G0J3     | La-related 2.57731959  | 1 | 1 | 1 | 66.9  | 9.55  | 0  | 1 |

|            |             |              |   |   |   |       |       |    |   |
|------------|-------------|--------------|---|---|---|-------|-------|----|---|
| H3BTB6     | COX assembl | 10.7526882   | 1 | 1 | 1 | 10.6  | 8.27  | 34 | 1 |
| Q06547     | GA-binding  | 2.53164557   | 1 | 1 | 1 | 42.5  | 4.86  | 61 | 1 |
| Q9BSH5     | Haloacid de | 7.56972112   | 1 | 1 | 1 | 28    | 6.71  | 0  | 1 |
| A8K5G2     | cDNA FLJ76  | 4.51010886   | 2 | 2 | 2 | 73.3  | 7.4   | 0  | 2 |
| E7EQB3     | tRNA-splici | 4.12698413   | 1 | 1 | 1 | 34.3  | 8.84  | 52 | 1 |
| A8K6Q5     | cDNA FLJ77  | 3.40557276   | 1 | 1 | 1 | 37.6  | 7.15  | 36 | 1 |
| AOA024R4S0 | Chromatin n | 6.30630631   | 2 | 2 | 2 | 25.1  | 5.97  | 38 | 2 |
| B2R892     | cDNA, FLJ9  | 8.39895013   | 1 | 1 | 1 | 43    | 7.44  | 0  | 1 |
| Q00613     | Heat shock  | 3.96975425   | 1 | 1 | 1 | 57.2  | 5.19  | 0  | 1 |
| P86790     | Vacuolar fu | 2.90456432   | 1 | 1 | 1 | 55.8  | 6.48  | 0  | 1 |
| B2RE29     | cDNA, FLJ9  | 8.28729282   | 1 | 1 | 1 | 20.5  | 6.35  | 0  | 1 |
| Q9NX05     | Constitutiv | 2.00729927   | 2 | 2 | 2 | 120.5 | 9.03  | 0  | 2 |
| Q49A26     | Putative o  | 3.07414105   | 1 | 1 | 1 | 60.5  | 9.17  | 24 | 1 |
| P62312     | U6 snRNA-as | 13.75        | 1 | 1 | 1 | 9.1   | 9.58  | 0  | 1 |
| Q9P260     | LisH domain | 2.38486842   | 2 | 2 | 2 | 134.5 | 5.45  | 0  | 2 |
| Q8N983     | 39S ribosom | 5.58139535   | 1 | 1 | 1 | 23.4  | 8.65  | 34 | 1 |
| Q8NEJ9     | Neuroguidir | 4.76190476   | 1 | 1 | 1 | 35.9  | 9.57  | 0  | 1 |
| B2RBH2     | cDNA, FLJ9  | 2.09059233   | 1 | 1 | 1 | 63.4  | 7.03  | 27 | 1 |
| Q9Y6N1     | Cytochrome  | 3.62318841   | 1 | 1 | 1 | 31.4  | 9.06  | 47 | 1 |
| Q96BP3     | Peptidylpr  | 3.86996904   | 2 | 2 | 2 | 73.5  | 7.15  | 0  | 2 |
| Q8WVK2     | U4/U6. U5   | sn10.3225806 | 1 | 1 | 1 | 18.8  | 11.62 | 0  | 1 |
| Q7Z3K3     | Pogo trans  | 1.41843972   | 1 | 1 | 1 | 155.2 | 7.4   | 0  | 1 |
| V9HW48     | SH3 domain  | 11.4035088   | 1 | 1 | 1 | 12.8  | 5.25  | 55 | 1 |
| Q9H3H1     | tRNA dimet  | 3.21199143   | 1 | 1 | 1 | 52.7  | 8.21  | 38 | 1 |
| Q8IVS2     | Malonyl-Co  | 2.30769231   | 1 | 1 | 1 | 42.9  | 8.72  | 54 | 1 |
| P85037     | Forkhead bc | 1.50068213   | 1 | 1 | 1 | 75.4  | 9.32  | 48 | 1 |
| Q9BPZ7     | Target of   | 12.68199234  | 1 | 1 | 1 | 59.1  | 7.55  | 51 | 1 |
| AOA075B767 | Peptidyl-p  | 20.7317073   | 2 | 5 | 1 | 18.2  | 9.06  | 38 | 2 |
| E5KN59     | Peptidyl-p  | 4.32432432   | 1 | 1 | 1 | 40.7  | 7.21  | 37 | 1 |
| AOA024R539 | Uncharacter | 5.76923077   | 2 | 2 | 2 | 35.1  | 5.35  | 37 | 2 |
| AOA1BOGVH5 | Alpha-keto  | 1.96779964   | 1 | 1 | 1 | 64.1  | 5.38  | 38 | 1 |
| O75976     | Carboxypep  | 10.86956522  | 1 | 1 | 1 | 152.8 | 6.05  | 0  | 1 |
| P53794     | Sodium/myo  | 3.06406685   | 1 | 1 | 1 | 79.6  | 7.27  | 0  | 1 |
| B3KPC7     | Actin-rela  | 7.84313725   | 1 | 2 | 1 | 17    | 6.02  | 75 | 1 |
| Q3LIB4     | Putative ur | 2.06185567   | 1 | 1 | 1 | 63.2  | 6.34  | 32 | 1 |
| AOA0AGYY96 | Iron-respor | 1.97300104   | 1 | 1 | 1 | 105   | 7.05  | 18 | 1 |
| Q8WWC4     | m-AAA prote | 4.81099656   | 1 | 1 | 1 | 32.5  | 9.17  | 0  | 1 |
| Q93100     | Phosphoryl  | 1.55535224   | 1 | 1 | 1 | 124.8 | 6.95  | 44 | 1 |
| Q8NBF2     | NHL repeat  | 4.68319559   | 3 | 3 | 3 | 79.4  | 5.55  | 41 | 3 |
| P56381     | ATP syntha  | 29.4117647   | 2 | 2 | 2 | 5.8   | 9.92  | 51 | 2 |
| P52434     | DNA-direct  | 10.66666667  | 1 | 1 | 1 | 17.1  | 4.68  | 0  | 1 |
| G5EA30     | CUG triplet | 3.307393     | 2 | 2 | 2 | 55.1  | 8.38  | 41 | 2 |
| B2RB94     | cDNA, FLJ9  | 1.40515222   | 1 | 1 | 1 | 98.5  | 5.9   | 53 | 1 |
| Q9Y6X1     | Stress-ass  | 42.4242424   | 1 | 1 | 1 | 7.4   | 11    | 37 | 1 |
| P57105     | Synaptojan  | 11.0344828   | 1 | 1 | 1 | 15.9  | 6.3   | 36 | 1 |
| Q8NCF5     | NFATC2-int  | 4.05727924   | 1 | 1 | 1 | 45.8  | 6.6   | 42 | 1 |
| P56385     | ATP syntha  | 30.4347826   | 2 | 2 | 2 | 7.9   | 9.35  | 35 | 2 |
| O75391     | Sperm-assoc | 4.40528634   | 1 | 1 | 1 | 26    | 7.91  | 46 | 1 |
| Q147X3     | N-alpha-ace | 5.24861878   | 1 | 2 | 1 | 39.3  | 5.52  | 0  | 1 |
| Q86Y79     | Probable pe | 11.682243    | 1 | 1 | 1 | 22.9  | 10.56 | 0  | 1 |
| B3KW34     | Protein YIF | 4.6692607    | 1 | 1 | 1 | 28    | 4.36  | 48 | 1 |
| Q5VV89     | Microsomal  | 9.03614458   | 1 | 1 | 1 | 18.4  | 9.96  | 0  | 1 |
| Q5VX20     | 6-phosphof  | 1.71102662   | 1 | 1 | 1 | 60.3  | 8.05  | 39 | 1 |
| Q8NAV1     | Pre-mRNA-s  | 5.12820513   | 1 | 1 | 1 | 37.5  | 9.96  | 0  | 1 |
| O96019     | Actin-like  | 2.33100233   | 1 | 1 | 1 | 47.4  | 5.6   | 42 | 1 |
| AOA024QZU8 | Ras respon  | 0.71132187   | 1 | 1 | 1 | 181.3 | 6.98  | 44 | 1 |
| Q14181     | DNA polymer | 5.35117057   | 2 | 2 | 2 | 65.9  | 5.24  | 0  | 2 |
| Q9Y6D9     | Mitotic spi | 2.22841226   | 1 | 1 | 1 | 83    | 5.92  | 0  | 1 |
| P53609     | Geranylger  | 2.3872679    | 1 | 1 | 1 | 42.3  | 6.83  | 0  | 1 |
| P54725     | UV excisor  | 5.23415978   | 2 | 2 | 1 | 39.6  | 4.58  | 29 | 2 |
| Q13287     | N-myc-inte  | 4.23452769   | 1 | 1 | 1 | 35    | 5.34  | 39 | 1 |
| E7EV07     | Rho guanin  | 0.49559471   | 1 | 1 | 1 | 198.1 | 6.57  | 39 | 1 |
| Q14241     | Elongin-A   | (2.13032581  | 1 | 1 | 1 | 89.9  | 9.57  | 0  | 1 |
| J3QR44     | Cyclin-dep  | 1.63522013   | 1 | 1 | 1 | 92.6  | 5.54  | 24 | 1 |
| Q9H0C8     | Integrin-li | 3.06122449   | 1 | 1 | 1 | 42.9  | 7.09  | 0  | 1 |
| Q9H6Y2     | WD repeat   | -c2.61096606 | 1 | 1 | 1 | 42    | 4.92  | 41 | 1 |
| F1TOA5     | PRP31 pre   | -n3.00601202 | 1 | 1 | 1 | 55.4  | 5.78  | 0  | 1 |
| AOA096LPC5 | WASH compl  | 1.49142431   | 1 | 1 | 1 | 147.1 | 4.81  | 0  | 1 |
| Q9NQA3     | WAS protei  | 3.80313199   | 1 | 1 | 1 | 48    | 5.67  | 58 | 1 |
| P81605     | Dermcidin   | (12.7272727  | 1 | 1 | 1 | 11.3  | 6.54  | 49 | 1 |
| Q6IBW4     | Condensin   | -1.65289256  | 1 | 1 | 1 | 68.2  | 4.74  | 0  | 1 |
| AOA024QZR3 | Protein pe  | 15.19480519  | 2 | 2 | 2 | 43.4  | 6.34  | 42 | 2 |
| Q13610     | Periodic tr | 2.99401198   | 1 | 1 | 1 | 55.8  | 4.77  | 19 | 1 |

|            |                        |     |   |   |   |       |       |    |   |
|------------|------------------------|-----|---|---|---|-------|-------|----|---|
| J3KNN5     | Probable A1            | 2.5 | 1 | 1 | 1 | 71.6  | 7.46  | 0  | 1 |
| P57081     | tRNA (guani5.09708738  |     | 1 | 1 | 1 | 45.5  | 7.11  | 39 | 1 |
| H3BM74     | NEDD8 ultin2.81690141  |     | 2 | 2 | 1 | 73.3  | 6.57  | 47 | 2 |
| Q4J6C6     | Prolyl endc 3.0261348  |     | 2 | 2 | 2 | 83.9  | 6.38  | 27 | 2 |
| Q9Y5K6     | CD2-associ2.03442879   |     | 1 | 1 | 1 | 71.4  | 6.4   | 53 | 1 |
| Q9UKM7     | Endoplasmic1.57367668  |     | 1 | 1 | 1 | 79.5  | 7.72  | 41 | 1 |
| Q92466     | DNA damage-7.25995316  |     | 2 | 2 | 2 | 47.8  | 9.47  | 0  | 2 |
| AOA0J9YWM6 | Alpha-amin36.5853659   |     | 1 | 1 | 1 | 4.6   | 4.72  | 0  | 1 |
| B7Z4W5     | Cysteine cc3.29457364  |     | 1 | 1 | 1 | 57.6  | 7.43  | 0  | 1 |
| Q56P03     | E2F-associ3.50877193   |     | 1 | 1 | 1 | 32.7  | 5.12  | 22 | 1 |
| P36551     | Oxygen-depe3.74449339  |     | 1 | 1 | 1 | 50.1  | 8.25  | 0  | 1 |
| Q9Y2Z2     | Protein MTC 1.9525802  |     | 1 | 1 | 1 | 79.9  | 8.31  | 39 | 1 |
| Q6P1N1     | PPM2C prote1.65016502  |     | 1 | 1 | 1 | 68.4  | 7.9   | 38 | 1 |
| D3DSY9     | Farnesyltr3.28227571   |     | 2 | 2 | 2 | 52.6  | 5.57  | 37 | 2 |
| Q7Z5L9     | Interferon 6.81431005  |     | 1 | 2 | 1 | 61    | 8.69  | 0  | 1 |
| Q9BRS2     | Serine/thrc2.28873239  |     | 1 | 1 | 1 | 65.5  | 6.19  | 0  | 1 |
| B4DEF8     | cDNA FLJ6116.99088146  |     | 2 | 2 | 2 | 37.8  | 9.13  | 30 | 2 |
| B4DNK0     | cDNA FLJ552.42825607   |     | 1 | 1 | 1 | 50.2  | 8.31  | 38 | 1 |
| G3V1L9     | Tight junct1.75339367  |     | 2 | 2 | 2 | 197.3 | 6.67  | 30 | 2 |
| Q96GM5     | SWI/SNF-re12.52427184  |     | 1 | 1 | 1 | 58.2  | 9.25  | 52 | 1 |
| Q9UK41     | Vacuolar pi11.3122172  |     | 1 | 1 | 1 | 25.4  | 5.54  | 0  | 1 |
| AOA024RA85 | Cell divisi1.25661376  |     | 2 | 2 | 1 | 164.8 | 9.69  | 55 | 2 |
| AOA024R001 | Transmembrc8.92857143  |     | 1 | 1 | 1 | 11.6  | 9.88  | 32 | 1 |
| Q96GQ5     | RUS1 famili1.92307692  |     | 1 | 1 | 1 | 51    | 6.93  | 27 | 1 |
| Q5JRA6     | Melanoma ir0.62926062  |     | 1 | 1 | 1 | 213.6 | 4.84  | 41 | 1 |
| Q9NR19     | Acetyl-coer1.85449358  |     | 1 | 1 | 1 | 78.5  | 6.46  | 0  | 1 |
| E9PRZ1     | Protein SA/2.10084034  |     | 1 | 1 | 1 | 53.8  | 4.54  | 40 | 1 |
| P28290     | Sperm-speci0.71485306  |     | 1 | 1 | 1 | 138.3 | 5.19  | 28 | 1 |
| Q13416     | Origin recc3.11958406  |     | 1 | 1 | 1 | 65.9  | 6.51  | 0  | 1 |
| P16144     | Integrin bc2.03073546  |     | 2 | 2 | 2 | 202   | 6.09  | 0  | 2 |
| AOA087WY96 | Transporter2.35783634  |     | 1 | 1 | 1 | 81.3  | 8.78  | 0  | 1 |
| Q8IXI1     | Mitochondri1.61812298  |     | 1 | 1 | 1 | 68.1  | 5.86  | 53 | 1 |
| P49750     | YLP motif-1.23013839   |     | 2 | 2 | 2 | 219.8 | 6.57  | 0  | 2 |
| F2Z2W7     | tRNA (uracil.55520995  |     | 1 | 1 | 1 | 70.8  | 8.05  | 39 | 1 |
| G0XQ39     | STIM1L OS=1.39064475   |     | 1 | 1 | 1 | 88.6  | 6.64  | 0  | 1 |
| Q86YV9     | Hermansky-I1.29032258  |     | 1 | 1 | 1 | 82.9  | 6.28  | 0  | 1 |
| AOA024R250 | Nucleolar p1.19352089  |     | 2 | 2 | 2 | 132.2 | 6.95  | 45 | 2 |
| AOA0S2Z2Z3 | ATP-binding1.32802125  |     | 1 | 1 | 1 | 82.7  | 9.33  | 43 | 1 |
| B4DY64     | cDNA FLJ5219.05923345  |     | 1 | 1 | 1 | 30.8  | 11.31 | 26 | 1 |
| Q8N5M4     | Tetratricor 8.1871345  |     | 1 | 1 | 1 | 20    | 8.92  | 0  | 1 |
| O15511     | Actin-relat11.9205298  |     | 2 | 2 | 2 | 16.3  | 5.67  | 67 | 2 |
| Q9BW19     | Kinesin-lil1.93164933  |     | 1 | 1 | 1 | 73.7  | 8.98  | 60 | 1 |
| Q53T59     | HCLS1-bindid4.33673469 |     | 1 | 1 | 1 | 42.8  | 5.01  | 33 | 1 |
| P78330     | Phosphoseri 4          |     | 1 | 2 | 1 | 25    | 5.69  | 42 | 1 |
| Q7Z4Z2     | SUZ domain-13.8157895  |     | 1 | 1 | 1 | 17    | 8.95  | 0  | 1 |
| P51159     | Ras-relatec4.97737557  |     | 1 | 1 | 1 | 24.9  | 5.22  | 25 | 1 |
| Q9HC36     | rRNA methyl6.42857143  |     | 1 | 1 | 1 | 47    | 8.73  | 0  | 1 |
| Q96HV5     | Transmembrc4.54545455  |     | 1 | 1 | 1 | 29.6  | 9.03  | 38 | 1 |
| Q9UBV2     | Protein sel2.14105793  |     | 1 | 1 | 1 | 88.7  | 5.39  | 0  | 1 |
| Q9H7D0     | Dedicator c1.06951872  |     | 1 | 1 | 1 | 215.2 | 7.96  | 26 | 1 |
| P07711     | Cathepsin l 4.2042042  |     | 1 | 1 | 1 | 37.5  | 5.45  | 0  | 1 |
| Q68CQ7     | Glycosyltr4.31266846   |     | 1 | 1 | 1 | 41.9  | 9.35  | 0  | 1 |
| Q2L6I0     | FB19 protei1.06382979  |     | 1 | 1 | 1 | 99    | 9.17  | 56 | 1 |
| P49247     | Ribose-5-pl5.78778135  |     | 1 | 1 | 1 | 33.2  | 8.54  | 0  | 1 |
| B2R5N4     | cDNA, FLJ92 6.6091954  |     | 1 | 1 | 1 | 39.7  | 8.38  | 0  | 1 |
| P52569     | Cationic an1.97568389  |     | 1 | 1 | 1 | 71.6  | 7.28  | 0  | 1 |
| K7ELP0     | Tropomyosir 15.942029  |     | 1 | 1 | 1 | 8     | 5.01  | 0  | 1 |
| Q92508     | Piezo-type 0.55533518  |     | 1 | 1 | 1 | 286.6 | 7.47  | 37 | 1 |
| Q5T280     | Putative me5.31914894  |     | 1 | 1 | 1 | 42    | 7.43  | 0  | 1 |
| A8K7G2     | cDNA FLJ7575.24017467  |     | 1 | 1 | 1 | 48.8  | 9.96  | 45 | 1 |
| Q9NVE7     | Pantothenat1.81112549  |     | 1 | 1 | 1 | 85.9  | 6.28  | 55 | 1 |
| P13473     | Lysosome-as1.95121951  |     | 1 | 2 | 1 | 44.9  | 5.63  | 75 | 1 |
| P48509     | CD151 anti3.95256917   |     | 1 | 1 | 1 | 28.3  | 7.47  | 24 | 1 |
| Q9UKJ3     | G patch don1.19840213  |     | 1 | 1 | 1 | 164.1 | 8.66  | 0  | 1 |
| Q94915     | Protein fun0.59741122  |     | 1 | 1 | 1 | 339.4 | 5.58  | 0  | 1 |
| Q99735     | Microsomal 9.52380952  |     | 1 | 1 | 1 | 16.6  | 9.55  | 36 | 1 |
| Q68D58     | Putative ur8.27586207  |     | 2 | 2 | 2 | 33    | 8.98  | 42 | 2 |
| Q9H000     | Probable E1.92307692   |     | 1 | 1 | 1 | 46.9  | 7.61  | 40 | 1 |
| P13984     | General tr4.41767068   |     | 1 | 1 | 1 | 28.4  | 9.23  | 0  | 1 |
| O75323     | Protein Nif5.24475524  |     | 2 | 2 | 2 | 33.7  | 9.36  | 30 | 2 |
| B3KNI0     | cDNA FLJ141.85979971   |     | 1 | 1 | 1 | 78.6  | 6.51  | 30 | 1 |
| AOA024R7X0 | ADP-ribosy10.97349919  |     | 1 | 1 | 1 | 208.6 | 5.85  | 39 | 1 |
| E5KRX5     | SURF1-like 5.33333333  |     | 1 | 1 | 1 | 33.3  | 9.6   | 0  | 1 |



|            |                        |   |   |   |       |       |    |   |
|------------|------------------------|---|---|---|-------|-------|----|---|
| Q9Y6X9     | MORC family0.96899225  | 1 | 1 | 1 | 117.8 | 8.38  | 0  | 1 |
| A8MYK1     | 39S ribosom7.85340314  | 1 | 1 | 1 | 21.8  | 11.62 | 30 | 1 |
| Q9ULC5     | Long-chain-3.07467057  | 1 | 1 | 1 | 75.9  | 6.92  | 0  | 1 |
| Q9BU14     | DNA-directe 3.1835206  | 1 | 1 | 1 | 60.6  | 7.31  | 22 | 1 |
| AOA024R136 | Rac GTPase 3.48101266  | 2 | 2 | 2 | 71    | 8.88  | 0  | 2 |
| B4DJL6     | Integrator 2.3465704   | 1 | 1 | 1 | 61.3  | 5.15  | 38 | 1 |
| Q5VWZ2     | Lysosphosphc8.01687764 | 1 | 1 | 1 | 26.3  | 7.84  | 0  | 1 |
| O95825     | Quinone oxi5.73065903  | 1 | 1 | 1 | 38.7  | 5.78  | 0  | 1 |
| P46977     | Dolichyl-di2.41134752  | 2 | 2 | 2 | 80.5  | 8.07  | 57 | 2 |
| Q96GL3     | IRF3 protei1.99115044  | 1 | 1 | 1 | 49.1  | 6.52  | 43 | 1 |
| P61457     | Pterin-4-all3.4615385  | 1 | 1 | 1 | 12    | 6.8   | 24 | 1 |
| P41247     | Patatin-li1 4.743083   | 1 | 1 | 1 | 28    | 9.11  | 34 | 1 |
| Q96RE7     | Nucleus acc3.79506641  | 2 | 2 | 2 | 57.2  | 5.74  | 33 | 2 |
| J3KQY1     | 39S ribosom5.17241379  | 1 | 1 | 1 | 26.5  | 9.74  | 35 | 1 |
| H7BYZ3     | Uncharacter3.62537764  | 1 | 1 | 1 | 36.9  | 8.34  | 51 | 1 |
| Q9Y5V0     | Zinc finger14.4736842  | 1 | 1 | 1 | 8.5   | 10.01 | 0  | 1 |
| Q17RY6     | Lymphocyte 6.06060606  | 1 | 1 | 1 | 18.7  | 7.43  | 36 | 1 |
| Q9UBL3     | Set1/Ash2 1.27388535   | 1 | 1 | 1 | 68.7  | 5.69  | 0  | 1 |
| B2RC06     | cDNA, FLJ9f4.36046512  | 1 | 1 | 1 | 39.3  | 9.36  | 0  | 1 |
| AOA1BOGVF3 | Carnitine (1.64179104  | 1 | 1 | 1 | 75.2  | 8.5   | 44 | 1 |
| Q9NVU7     | Protein SD/ 1.8922853  | 2 | 2 | 2 | 79.8  | 9.25  | 58 | 2 |
| Q9BVL4     | Selenoprotc2.98953662  | 1 | 1 | 1 | 73.4  | 5.97  | 32 | 1 |
| P78345     | Ribonuclea11.3074205   | 1 | 1 | 1 | 31.8  | 9.92  | 0  | 1 |
| Q658J6     | Microtubule 11.2       | 1 | 1 | 1 | 14.7  | 8.94  | 24 | 1 |
| Q96RU2     | Ubiquitin c1.11420613  | 1 | 1 | 1 | 122.4 | 5.2   | 0  | 1 |
| Q86WA8     | Lon proteas2.11267606  | 2 | 2 | 2 | 94.6  | 7.3   | 32 | 2 |
| Q6P158     | Putative A11.15440115  | 2 | 2 | 1 | 155.5 | 7.71  | 38 | 2 |
| Q4G148     | Glucoside >1.81818182  | 1 | 1 | 1 | 50.5  | 8.65  | 44 | 1 |
| AOA024R2K4 | Leucine ric2.02156334  | 1 | 1 | 1 | 84.1  | 6.98  | 48 | 1 |
| Q9BU61     | NADH dehyd5.43478261   | 1 | 1 | 1 | 20.3  | 8.22  | 52 | 1 |
| H6QX63     | Hepatocell5.57377049   | 1 | 1 | 1 | 34.8  | 10.78 | 0  | 1 |
| Q9H4G0     | Band 4.1-lil1.70261067 | 1 | 1 | 1 | 98.4  | 5.62  | 0  | 1 |
| A5YM53     | ITGAV prote1.04961832  | 1 | 1 | 1 | 116   | 5.74  | 0  | 1 |
| AOA169TED2 | Protein kir2.08333333  | 1 | 1 | 1 | 76.6  | 7.47  | 0  | 1 |
| AOA024RBI7 | Glycolipid 7.17703349  | 1 | 1 | 1 | 23.8  | 7.39  | 20 | 1 |
| Q96HR9     | Receptor e3.79146919   | 1 | 1 | 1 | 23.4  | 8.56  | 29 | 1 |
| Q5VV42     | Threonylca2.07253886   | 1 | 1 | 1 | 65.1  | 7.46  | 0  | 1 |
| Q15477     | Helicase S1 1.8459069  | 1 | 1 | 1 | 137.7 | 6.06  | 0  | 1 |
| P48651     | Phosphatidy 2.1141649  | 1 | 1 | 1 | 55.5  | 8.43  | 44 | 1 |
| Q6PHR2     | Serine/thre3.38983051  | 1 | 1 | 1 | 53.4  | 7.36  | 0  | 1 |
| Q12888     | Tumor suppl0.65922921  | 1 | 1 | 1 | 213.4 | 4.7   | 41 | 1 |
| Q9Y2X9     | Zinc finger1.89944134  | 1 | 1 | 1 | 96.9  | 8.48  | 46 | 1 |
| P56557     | Transmembr5.06329114   | 1 | 1 | 1 | 17.9  | 5.39  | 43 | 1 |
| Q9HAA9     | cDNA FLJ11f4.49438202  | 1 | 1 | 1 | 40.9  | 9.42  | 0  | 1 |
| Q02127     | Dihydroorot4.81012658  | 2 | 2 | 2 | 42.8  | 9.67  | 0  | 2 |
| Q9Y6G5     | COMM domair4.45544554  | 1 | 1 | 1 | 23    | 6.54  | 53 | 1 |
| B7ZC38     | Endophilin- 3.75       | 1 | 1 | 1 | 44.3  | 5.82  | 27 | 1 |
| P62253     | Ubiquitin-c5.88235294  | 1 | 1 | 1 | 19.5  | 5.3   | 38 | 1 |
| Q9UPT9     | Ubiquitin c4.38095238  | 1 | 1 | 1 | 59.9  | 8.05  | 0  | 1 |
| Q8IXI2     | Mitochondri1.45631068  | 1 | 1 | 1 | 70.7  | 6.27  | 25 | 1 |
| Q5TA45     | Integrator 1.66666667  | 1 | 1 | 1 | 67.6  | 8.06  | 42 | 1 |
| Q8WXG6     | MAP kinase- 0.7893139  | 1 | 1 | 1 | 183.2 | 6.04  | 45 | 1 |
| Q96EL2     | 28S ribosom11.9760479  | 1 | 1 | 1 | 19    | 9.38  | 0  | 1 |
| P17050     | Alpha-N-acc2.67639903  | 1 | 1 | 1 | 46.5  | 5.19  | 39 | 1 |
| Q6UX04     | Peptidyl-pi3.60169492  | 1 | 1 | 1 | 53.8  | 5.8   | 0  | 1 |
| Q9BX40     | Protein LSA6.75324675  | 1 | 1 | 1 | 42    | 9.69  | 0  | 1 |
| Q13444     | Disintegrir1.39049826  | 1 | 1 | 1 | 92.9  | 6.73  | 37 | 1 |
| E9LUH4     | Methyl-CpG-2.73972603  | 1 | 1 | 1 | 55.1  | 9.96  | 0  | 1 |
| Q8IXM2     | Chromatin c7.55813953  | 1 | 1 | 1 | 17.9  | 7.33  | 0  | 1 |
| Q59GF1     | Anion exche0.80385852  | 1 | 1 | 1 | 137.2 | 6.25  | 29 | 1 |
| AOA087WWM1 | Mucin-1 OS-0.87163233  | 1 | 1 | 1 | 122.9 | 7.56  | 20 | 1 |
| J3KTI2     | Migration e9.48275862  | 1 | 1 | 1 | 12.4  | 4.41  | 0  | 1 |
| I7JB59     | ABCG2 prote1.52671756  | 1 | 1 | 1 | 72.4  | 8.76  | 26 | 1 |
| O75616     | GTPase Era,2.28832952  | 1 | 1 | 1 | 48.3  | 8.84  | 40 | 1 |
| Q8IV48     | 3' -5' exori2.86532951 | 1 | 1 | 1 | 40    | 6.7   | 28 | 1 |
| Q15562     | Transcripti2.68456376  | 1 | 1 | 1 | 49.2  | 6.47  | 0  | 1 |
| Q8NEY8     | Periphilin-2.18340611  | 1 | 1 | 1 | 52.7  | 9.11  | 19 | 1 |
| Q8NOU8     | Vitamin K c10.2272727  | 2 | 2 | 2 | 19.8  | 9.13  | 43 | 2 |
| B2RDX7     | cDNA, FLJ9f2.96296296  | 1 | 1 | 1 | 59.7  | 7.66  | 0  | 1 |
| Q9ULH0     | Kinase D-ir0.56465274  | 1 | 1 | 1 | 196.4 | 6.62  | 54 | 1 |
| B2R5I8     | cDNA, FLJ9f6.22222222  | 1 | 1 | 1 | 24.9  | 6.68  | 0  | 1 |
| P62875     | DNA-directc16.4179104  | 1 | 1 | 1 | 7.6   | 7.77  | 0  | 1 |
| Q96P48     | Arf-GAP wit0.89655172  | 1 | 1 | 1 | 162.1 | 6.23  | 30 | 1 |

|            |                        |   |   |   |       |      |    |   |
|------------|------------------------|---|---|---|-------|------|----|---|
| Q9H1A4     | Anaphase-p1.02880658   | 1 | 1 | 1 | 216.4 | 6.3  | 0  | 1 |
| A0A0S2Z4W2 | Giant axone2.34505863  | 1 | 1 | 1 | 67.6  | 5.85 | 44 | 1 |
| Q8NI60     | Atypical kil.54559505  | 1 | 1 | 1 | 71.9  | 6.99 | 35 | 1 |
| Q14807     | Kinesin-li12.70676692  | 1 | 1 | 1 | 73.2  | 9.45 | 0  | 1 |
| Q9NYB0     | Telomeric r7.26817043  | 1 | 1 | 1 | 44.2  | 4.73 | 0  | 1 |
| P11182     | Lipoamide e4.77178423  | 2 | 2 | 2 | 53.5  | 8.51 | 33 | 2 |
| P09497     | Clathrin li7.42358079  | 2 | 2 | 2 | 25.2  | 4.64 | 43 | 2 |
| Q15582     | Transformir 1.9033675  | 1 | 2 | 1 | 74.6  | 7.71 | 29 | 1 |
| Q96PU8     | Protein quc4.98533724  | 1 | 1 | 1 | 37.6  | 8.56 | 0  | 1 |
| P49757     | Protein nun1.68970814  | 1 | 1 | 1 | 70.8  | 8.51 | 0  | 1 |
| Q9NV35     | Nucleotide 6.70731707  | 1 | 1 | 1 | 18.6  | 6.14 | 0  | 1 |
| Q3MHU6     | NDUFB1 prot12.3595506  | 1 | 1 | 1 | 10    | 8.92 | 34 | 1 |
| Q9BX69     | Caspase rec1.35004822  | 1 | 1 | 1 | 116.4 | 6.37 | 0  | 1 |
| Q8WW22     | DnaJ homolc2.26700252  | 1 | 1 | 1 | 44.8  | 7.59 | 39 | 1 |
| Q9H1E5     | Thioredoxir3.72492837  | 1 | 1 | 1 | 38.9  | 4.37 | 39 | 1 |
| Q05707     | Collagen a10.66815145  | 1 | 1 | 1 | 193.4 | 5.3  | 0  | 1 |
| Q9Y3A4     | Ribosomal f2.85714286  | 1 | 1 | 1 | 32.3  | 9.58 | 39 | 1 |
| Q96ES7     | SAGA-associ4.43686007  | 1 | 1 | 1 | 33.2  | 8.1  | 31 | 1 |
| Q7GIM7     | Cytochrome 5.36398467  | 1 | 2 | 1 | 29.9  | 7.31 | 0  | 1 |
| F8VZG9     | RNA-binding1.93133047  | 1 | 1 | 1 | 50.5  | 6.1  | 17 | 1 |
| P61165     | Transmembr10.1265823   | 1 | 1 | 1 | 9.1   | 5.83 | 40 | 1 |
| Q9BVM2     | Protein DP4.92610837   | 1 | 1 | 1 | 23.2  | 9.03 | 43 | 1 |
| Q9H330     | Transmembr1.42700329   | 1 | 1 | 1 | 100.9 | 8.87 | 28 | 1 |
| Q8N4Q0     | Prostaglanc 2.3872679  | 1 | 1 | 1 | 40.1  | 8.18 | 53 | 1 |
| D6W5Y5     | Cold induci 3.7037037  | 1 | 1 | 1 | 31.9  | 9.61 | 0  | 1 |
| P01042     | Kininogen-11.70807453  | 1 | 1 | 1 | 71.9  | 6.81 | 0  | 1 |
| A0A087X266 | Transmembr2.98102981   | 1 | 1 | 1 | 42.9  | 8.43 | 0  | 1 |
| Q9NWX9     | Uncharacter8.57142857  | 1 | 1 | 1 | 16    | 4.94 | 35 | 1 |
| J3KQ42     | Tetraspanir9.72762646  | 1 | 1 | 1 | 28    | 7.42 | 37 | 1 |
| A0A0U1RRM6 | Protein en1.49625935   | 1 | 1 | 1 | 87.3  | 7.77 | 28 | 1 |
| O60669     | Monocarboxy3.13807531  | 1 | 1 | 1 | 52.2  | 9.31 | 0  | 1 |
| Q9H788     | SH2 domain-3.30396476  | 1 | 1 | 1 | 52.7  | 8.06 | 0  | 1 |
| Q9COD5     | Protein TA1.12842558   | 1 | 1 | 1 | 202.1 | 8.32 | 0  | 1 |
| B3KVH4     | cDNA FLJ16f3.54166667  | 1 | 1 | 1 | 55.6  | 6.07 | 0  | 1 |
| Q8WUB8     | PHD finger 2.20883534  | 1 | 1 | 1 | 56    | 6.62 | 38 | 1 |
| B5BTZ7     | Serine/thrc3.85438972  | 1 | 1 | 1 | 54.6  | 7.17 | 33 | 1 |
| B2R8X4     | cDNA, FLJ9f2.64317181  | 1 | 1 | 1 | 51.2  | 4.97 | 0  | 1 |
| Q14186     | Transcripti3.65853659  | 1 | 1 | 1 | 45    | 6.05 | 35 | 1 |
| Q96K17     | Transcripti18.9873418  | 1 | 1 | 1 | 17.3  | 6.35 | 0  | 1 |
| Q86WQ0     | Nuclear rec17.2661871  | 1 | 1 | 1 | 15.9  | 6.16 | 0  | 1 |
| O75818     | Ribonucleaε 4.4077135  | 1 | 1 | 1 | 41.8  | 6.67 | 0  | 1 |
| Q9GZQ3     | COMM domair8.92857143  | 1 | 1 | 1 | 24.7  | 7.02 | 0  | 1 |
| A0A0A0MTL5 | S-phase kir3.44827586  | 1 | 1 | 1 | 48.9  | 6.99 | 37 | 1 |
| O76095     | Protein JTE8.90410959  | 1 | 1 | 1 | 16.3  | 8.28 | 44 | 1 |
| O95159     | Zinc finger3.22580645  | 1 | 1 | 1 | 34.1  | 8.07 | 0  | 1 |
| O15162     | Phospholipi3.14465409  | 1 | 1 | 1 | 35    | 4.94 | 0  | 1 |
| P35869     | Aryl hydroc2.00471698  | 1 | 1 | 1 | 96.1  | 6.38 | 0  | 1 |
| E7ESA6     | Focal adhe0.91240876   | 1 | 1 | 1 | 124   | 6.62 | 33 | 1 |
| O15013     | Rho guanin1.38787436   | 1 | 1 | 1 | 151.5 | 5.68 | 0  | 1 |
| B2R5H5     | cDNA, FLJ9f13.7254902  | 2 | 2 | 2 | 11.8  | 4.7  | 42 | 2 |
| Q9Y6W5     | Wiskott-Alc 1.6064257  | 1 | 1 | 1 | 54.3  | 5.53 | 43 | 1 |
| Q9Y3Z3     | Deoxynuclec3.35463259  | 1 | 1 | 1 | 72.2  | 7.14 | 0  | 1 |
| A0A087WX97 | Bcl-2-like 1.76817289  | 1 | 1 | 1 | 54.4  | 4.54 | 46 | 1 |
| B4DRL5     | cDNA FLJ60f 3.1420765  | 1 | 1 | 1 | 83.9  | 5.88 | 0  | 1 |
| Q8WWB7     | Glycosylatε6.40394089  | 1 | 1 | 1 | 43.8  | 6.58 | 0  | 1 |
| A0A024RAZ8 | Single-strε4.44444444  | 1 | 1 | 1 | 29.8  | 6.62 | 30 | 1 |
| Q3ZAQ7     | Vacuolar A111.8811881  | 1 | 2 | 1 | 11.3  | 7.24 | 43 | 1 |
| Q99549     | M-phase phc1.62790698  | 1 | 1 | 1 | 97.1  | 6.06 | 0  | 1 |
| Q9UII4     | E3 ISG15-r1.85546875   | 1 | 1 | 1 | 116.8 | 7.65 | 19 | 1 |
| Q86X10     | Ral GTPase-1.07095047  | 1 | 1 | 1 | 166.7 | 6.79 | 0  | 1 |
| Q7Z7K0     | COX assemb19.43396226  | 1 | 1 | 1 | 12.5  | 8.63 | 41 | 1 |
| Q96HR8     | H/ACA ribor 2.0242915  | 1 | 1 | 1 | 53.7  | 4.87 | 0  | 1 |
| Q7Z7L1     | Schlafen fε 1.2208657  | 1 | 1 | 1 | 102.8 | 7.77 | 37 | 1 |
| A9UEZ6     | BCR/ABL fuε1.28597673  | 1 | 1 | 1 | 178.5 | 8.31 | 0  | 1 |
| Q8NBP7     | Proprotein 3.32369942  | 1 | 1 | 1 | 74.2  | 6.61 | 0  | 1 |
| Q99575     | Ribonucleaε 1.46484375 | 1 | 1 | 1 | 114.6 | 9.22 | 27 | 1 |
| O00442     | RNA 3'-tern5.46448087  | 1 | 1 | 1 | 39.3  | 7.85 | 33 | 1 |
| O75146     | Huntingtin-1.12359551  | 1 | 1 | 1 | 119.3 | 6.67 | 0  | 1 |
| Q9NZJ0     | Denticleleε2.46575342  | 2 | 2 | 2 | 79.4  | 8.87 | 36 | 2 |
| Q9NX74     | tRNA-dihyd3.65111562   | 2 | 2 | 1 | 55    | 7.11 | 0  | 2 |
| Q5JPC1     | Putative ur 3.125      | 1 | 1 | 1 | 35.5  | 9.55 | 0  | 1 |
| P35914     | Hydroxymetf4.61538462  | 1 | 1 | 1 | 34.3  | 8.54 | 0  | 1 |
| A0A024R370 | TATA elemer 1.0978957  | 1 | 1 | 1 | 122.8 | 4.92 | 0  | 1 |

|            |                        |   |   |   |       |       |    |   |
|------------|------------------------|---|---|---|-------|-------|----|---|
| Q9BTC8     | Metastasis-2.69360269  | 2 | 2 | 1 | 67.5  | 8.57  | 41 | 2 |
| A0A0S2Z556 | Polyglutami3.20284698  | 1 | 1 | 1 | 32.2  | 6.34  | 29 | 1 |
| Q5T447     | E3 ubiquitin1.62601626 | 1 | 1 | 1 | 97.1  | 5.64  | 34 | 1 |
| A0A140T8X7 | Lysosomal 14.54545455  | 1 | 1 | 1 | 34.9  | 6.33  | 0  | 1 |
| P56945     | Breast cancl.37931034  | 1 | 1 | 1 | 93.3  | 5.67  | 0  | 1 |
| Q92990     | Glomulin OS-1.68350168 | 1 | 1 | 1 | 68.2  | 5.33  | 44 | 1 |
| Q8N884     | Cyclic GMP-3.25670498  | 1 | 1 | 1 | 58.8  | 9.48  | 0  | 1 |
| E5KRP5     | Spastin OS-1.94805195  | 1 | 1 | 1 | 67.2  | 9.64  | 32 | 1 |
| Q96D71     | RalBP1-assc2.01005025  | 1 | 1 | 1 | 86.6  | 5.69  | 32 | 1 |
| Q12849     | G-rich seq2.29166667   | 1 | 1 | 1 | 53.1  | 6.19  | 36 | 1 |
| Q9Y487     | V-type prot1.40186916  | 1 | 1 | 1 | 98    | 6.61  | 38 | 1 |
| A0A024R0Q5 | Protein phc1.57004831  | 1 | 1 | 1 | 89    | 6.81  | 26 | 1 |
| Q99590     | Protein SC1.367054     | 2 | 2 | 2 | 164.6 | 8.41  | 0  | 2 |
| P49711     | Transcripti2.47592847  | 1 | 1 | 1 | 82.7  | 6.96  | 0  | 1 |
| P50748     | Kinetochore0.49796288  | 1 | 1 | 1 | 250.6 | 5.97  | 0  | 1 |
| A0A024QZW3 | RAN binding1.2345679   | 1 | 1 | 1 | 77.8  | 6.79  | 36 | 1 |
| A0A0S2Z4U0 | Ras and Raf1.40485313  | 1 | 1 | 1 | 84    | 8.02  | 28 | 1 |
| Q9Y2H6     | Fibronectin1.0851419   | 1 | 1 | 1 | 131.8 | 6.71  | 0  | 1 |
| Q8N9N8     | Probable R1.9.6969697  | 1 | 1 | 1 | 19    | 5.21  | 46 | 1 |
| B2R623     | mRNA-cappir1.67504188  | 1 | 1 | 1 | 68.4  | 8.22  | 40 | 1 |
| Q9UL15     | BAG family 3.3557047   | 1 | 1 | 1 | 51.2  | 6.05  | 0  | 1 |
| B2RBM8     | cDNA, FLJ912.35934664  | 1 | 1 | 1 | 123.5 | 7.42  | 0  | 1 |
| A0A024R9V7 | Uncharacter3.55239787  | 1 | 2 | 1 | 60.7  | 4.68  | 0  | 1 |
| 000418     | Eukaryotic 2.06896552  | 1 | 1 | 1 | 82.1  | 5.33  | 0  | 1 |
| 075582     | Ribosomal p1.99750623  | 1 | 1 | 1 | 89.8  | 7.11  | 31 | 1 |
| Q9Y2R0     | Cytochrome 8.49056604  | 1 | 1 | 1 | 11.7  | 9.6   | 38 | 1 |
| A0A0C4DFN1 | Mitofusin-11.34952767  | 1 | 1 | 1 | 84.1  | 6.33  | 32 | 1 |
| B2RDK3     | Oxysterol-13.54166667  | 1 | 1 | 1 | 55.1  | 6.44  | 0  | 1 |
| B2RDG9     | cDNA, FLJ912.15827338  | 1 | 1 | 1 | 46.2  | 7.62  | 32 | 1 |
| Q9H3R5     | Centromere 6.88259109  | 1 | 1 | 1 | 28.5  | 5.29  | 32 | 1 |
| Q8TCT8     | Signal pept2.69230769  | 1 | 1 | 1 | 58.1  | 8.32  | 0  | 1 |
| Q9H2X9     | Solute car1.22914838   | 1 | 1 | 1 | 126.1 | 6.73  | 0  | 1 |
| 060287     | Nucleolar p1.92470277  | 2 | 2 | 2 | 254.2 | 6.47  | 0  | 2 |
| A4D1L5     | Ubiquitin-c5.46448087  | 1 | 1 | 1 | 20.6  | 4.67  | 0  | 1 |
| Q9NWB6     | Arginine ar5.49450549  | 2 | 2 | 2 | 33.2  | 10.35 | 40 | 2 |
| Q99583     | Max-binding1.71821306  | 1 | 1 | 1 | 62.3  | 8.78  | 41 | 1 |
| B2R4M6     | Protein S1(11.4035088  | 1 | 1 | 1 | 13.2  | 6.13  | 0  | 1 |
| Q5T1C6     | Acyl-coenz3.33333333   | 1 | 1 | 1 | 27.1  | 8.28  | 38 | 1 |
| F8WBV6     | Small EDRK-10.1851852  | 1 | 1 | 1 | 11.9  | 10.84 | 42 | 1 |
| Q9HCG8     | Pre-mRNA-s1.98237885   | 2 | 2 | 2 | 105.4 | 7.03  | 31 | 2 |
| Q8N1G0     | Zinc finger1.21261116  | 1 | 1 | 1 | 129.4 | 8.19  | 38 | 1 |
| Q9BVT8     | Transmembr4.87804878   | 1 | 1 | 1 | 26.2  | 5.72  | 18 | 1 |
| Q86TI2     | Dipeptidyl 3.93974508  | 2 | 2 | 2 | 98.2  | 6.46  | 0  | 2 |
| B4DKA9     | cDNA FLJ611.06007067   | 1 | 1 | 1 | 97.4  | 4.94  | 40 | 1 |
| Q9UNN8     | Endothelial4.20168067  | 1 | 1 | 1 | 26.7  | 7.18  | 35 | 1 |
| U6FSN9     | Tyrosine-p1.95341848   | 1 | 1 | 1 | 150.4 | 6.29  | 0  | 1 |
| B4DX46     | cDNA FLJ521.15311005   | 1 | 1 | 1 | 47.3  | 5.05  | 35 | 1 |
| Q70CQ2     | Ubiquitin c0.33840948  | 1 | 1 | 1 | 404   | 5.82  | 36 | 1 |
| 014618     | Copper char2.91970803  | 1 | 1 | 1 | 29    | 5.58  | 26 | 1 |
| Q9UGM6     | Tryptophan-4.44444444  | 1 | 1 | 1 | 40.1  | 9.28  | 0  | 1 |
| U3KQK5     | Uncharacter5.48780488  | 1 | 2 | 1 | 17    | 10.8  | 0  | 1 |
| Q53Y03     | COX4 neigh5.71428571   | 1 | 2 | 1 | 23.8  | 6.4   | 36 | 1 |
| Q96LJ7     | Dehydrogen6.07028754   | 1 | 1 | 1 | 33.9  | 7.83  | 0  | 1 |
| Q9NVT9     | Armadillo r1.44680851  | 1 | 1 | 1 | 31.3  | 5.74  | 0  | 1 |
| 043653     | Prostate st 1.81300813 | 1 | 1 | 1 | 12.9  | 5.29  | 26 | 1 |
| Q14149     | MORC family1.81043663  | 1 | 1 | 1 | 107   | 5.6   | 17 | 1 |
| A0A140VK92 | Secretory c4.25531915  | 1 | 1 | 1 | 36.6  | 6.1   | 0  | 1 |
| Q9BUH6     | Protein PA14.41176471  | 1 | 1 | 1 | 21.6  | 5.48  | 0  | 1 |
| 095983     | Methyl-CpG-6.87285223  | 2 | 2 | 2 | 32.8  | 5.34  | 0  | 2 |
| B2R932     | cDNA, FLJ915.40540541  | 1 | 1 | 1 | 18.9  | 4.82  | 35 | 1 |
| Q4LE43     | Phosphoino1.41643059   | 1 | 1 | 1 | 161.2 | 7.18  | 0  | 1 |
| A0A0A0MQW3 | Serpin B13 1.75        | 1 | 1 | 1 | 45.3  | 5.82  | 45 | 1 |
| 075530     | Polycomb p14.08163265  | 2 | 2 | 2 | 50.2  | 7.03  | 0  | 2 |
| A8K1U9     | cDNA FLJ7611.35317997  | 1 | 1 | 1 | 83    | 8.81  | 29 | 1 |
| Q9BWS9     | Chitinase c2.79898219  | 1 | 1 | 1 | 44.9  | 8.63  | 42 | 1 |
| Q9UHA2     | SS18-like r12.987013   | 1 | 1 | 1 | 8.8   | 5.83  | 30 | 1 |
| Q9BV44     | THUMP domai4.14201183  | 2 | 2 | 2 | 57    | 6.37  | 25 | 2 |
| Q8N523     | Tuftelin-ir1.43369176  | 1 | 1 | 1 | 96.7  | 5.67  | 0  | 1 |
| A0A024R8D4 | Mitochondri3.44827586  | 1 | 1 | 1 | 35.5  | 8.94  | 0  | 1 |
| Q5VSL9     | Striatin-ir1.19474313  | 1 | 1 | 1 | 95.5  | 6.29  | 0  | 1 |
| Q8IUX1     | Complex I z6.08695652  | 1 | 1 | 1 | 25.9  | 8.81  | 0  | 1 |
| Q12899     | Tripartite 1.48423006  | 1 | 1 | 1 | 62.1  | 5.03  | 34 | 1 |
| Q9H5X1     | MIP18 famil 5.625      | 1 | 1 | 1 | 18.3  | 4.88  | 0  | 1 |

|            |                        |   |   |   |       |       |    |   |
|------------|------------------------|---|---|---|-------|-------|----|---|
| 095551     | Tyrosyl-DN/2.48618785  | 1 | 1 | 1 | 40.9  | 5.1   | 42 | 1 |
| Q99614     | Tetratricop3.76712329  | 1 | 1 | 1 | 33.5  | 4.84  | 0  | 1 |
| B7ZKJ3     | EPH receptcl.54142582  | 1 | 1 | 1 | 114.8 | 6.93  | 0  | 1 |
| B4DUA7     | Intersex-li6.33484163  | 1 | 1 | 1 | 23.5  | 8.16  | 0  | 1 |
| P07998     | Ribonucleas4.48717949  | 1 | 1 | 1 | 17.6  | 8.79  | 0  | 1 |
| Q15361     | Transcriptil.43646409  | 1 | 1 | 1 | 103   | 9.38  | 0  | 1 |
| Q9NVU0     | DNA-directe2.40112994  | 1 | 1 | 1 | 79.8  | 6.47  | 23 | 1 |
| P58557     | Putative ri9.58083832  | 1 | 1 | 1 | 19.3  | 7.55  | 0  | 1 |
| F5GXA0     | Sulfatase-n3.99061033  | 1 | 1 | 1 | 46.8  | 6.89  | 0  | 1 |
| A8K2Q6     | Peptidyl-pr6.13207547  | 1 | 1 | 1 | 22.7  | 8.4   | 0  | 1 |
| O43815     | Striatin O5.41025641   | 1 | 1 | 1 | 86.1  | 5.27  | 31 | 1 |
| Q9BU23     | Lipase matt2.97029703  | 1 | 1 | 1 | 79.6  | 10.1  | 39 | 1 |
| Q99598     | Translin-a5.2.4137931  | 1 | 1 | 1 | 33.1  | 6.55  | 23 | 1 |
| PODJ93     | Small integ13.1868132  | 1 | 1 | 1 | 10.3  | 6.67  | 21 | 1 |
| O60566     | Mitotic chc0.66666667  | 1 | 1 | 1 | 119.5 | 5.27  | 35 | 1 |
| Q6P1M0     | Long-chain 1.39968896  | 1 | 1 | 1 | 72    | 8.47  | 30 | 1 |
| Q9NQT5     | Exosome con 8          | 2 | 2 | 2 | 29.6  | 8.1   | 0  | 2 |
| Q9Y4B6     | Protein VPf0.72992701  | 1 | 1 | 1 | 168.9 | 5.06  | 0  | 1 |
| B5BU81     | YKT6 v-SNAF4.04040404  | 1 | 1 | 1 | 22.4  | 6.92  | 36 | 1 |
| Q7Z6E9     | E3 ubiquitil.67410714  | 1 | 2 | 1 | 201.4 | 9.64  | 0  | 1 |
| Q8TE02     | Elongator c4.11392405  | 1 | 1 | 1 | 34.8  | 4.97  | 0  | 1 |
| Q9BZI7     | Regulator c1.86335404  | 1 | 1 | 1 | 57.7  | 9.48  | 0  | 1 |
| AOA024R6D1 | NIMA (Never 1.3278856  | 1 | 1 | 1 | 107.1 | 5.73  | 0  | 1 |
| Q8IZ03     | Interferon- 2.0661157  | 1 | 1 | 1 | 56.2  | 6.76  | 0  | 1 |
| Q96EX1     | Small integ10.8695652  | 1 | 1 | 1 | 10.8  | 8.44  | 29 | 1 |
| Q08722     | Leukocyte s2.47678019  | 1 | 1 | 1 | 35.2  | 7.21  | 0  | 1 |
| Q9UQR0     | Sex comb or1.57142857  | 1 | 1 | 1 | 77.2  | 8.54  | 0  | 1 |
| Q86Y39     | NADH dehyd7.80141844   | 1 | 1 | 1 | 14.8  | 8.72  | 0  | 1 |
| Q6ZNW5     | GDP-D-glucc 3.8961039  | 1 | 1 | 1 | 42.3  | 6.47  | 0  | 1 |
| Q9H8V3     | Protein EC11.42231947  | 1 | 1 | 1 | 103.4 | 7.71  | 37 | 1 |
| Q9UHL4     | Dipeptidyl 2.43902439  | 1 | 1 | 1 | 54.3  | 6.32  | 0  | 1 |
| Q14BN4     | Sarcolemma12.17391304  | 1 | 1 | 1 | 95.1  | 5.47  | 0  | 1 |
| Q4KMQ2     | Anoctamin-f2.41758242  | 1 | 1 | 1 | 106.1 | 7.77  | 0  | 1 |
| P08473     | Neprilysin 1.2         | 1 | 1 | 1 | 85.5  | 5.73  | 27 | 1 |
| O75376     | Nuclear rec0.53278689  | 1 | 1 | 1 | 270   | 7.11  | 36 | 1 |
| AOA024R9E4 | Mal, T-cell 6.25       | 1 | 1 | 1 | 19.1  | 6.24  | 35 | 1 |
| Q9BUE0     | Mediator of3.84615385  | 1 | 1 | 1 | 23.6  | 6.54  | 30 | 1 |
| AOA024R7V7 | Chromodomai0.29890402  | 1 | 1 | 1 | 337.4 | 6.42  | 24 | 1 |
| Q969E8     | Pre-rRNA-p14.71204188  | 1 | 1 | 1 | 20.9  | 4.39  | 40 | 1 |
| Q13595     | Transformer3.54609929  | 2 | 2 | 2 | 32.7  | 11.27 | 0  | 2 |
| B2RBC8     | cDNA, FLJ9f0.66730219  | 1 | 1 | 1 | 115.5 | 6.11  | 39 | 1 |
| Q9NVG8     | TBC1 domair 2.5        | 1 | 1 | 1 | 46.5  | 5.24  | 41 | 1 |
| Q5SWX8     | Protein odr2.86343612  | 1 | 1 | 1 | 51.1  | 5.92  | 36 | 1 |
| Q9BWH6     | RNA polymer 0.78966626 | 1 | 1 | 1 | 152.7 | 6.38  | 0  | 1 |
| P15954     | Cytochrome 14.2857143  | 1 | 1 | 1 | 7.2   | 10.27 | 31 | 1 |
| Q9BSE5     | Agmatinase.2.84090909  | 1 | 1 | 1 | 37.6  | 7.59  | 37 | 1 |
| B3KME2     | cDNA FLJ1072.74314214  | 1 | 1 | 1 | 46.5  | 5.85  | 0  | 1 |
| Q8IYI6     | Exocyst con1.51724138  | 1 | 1 | 1 | 81.7  | 5.49  | 0  | 1 |
| Q9HAU5     | Regulator c0.70754717  | 1 | 1 | 1 | 147.7 | 5.69  | 33 | 1 |
| Q9UKG1     | DCC-interac0.98730606  | 1 | 1 | 1 | 79.6  | 5.41  | 37 | 1 |
| B2R6X2     | Beta-glucul1.38248848  | 1 | 1 | 1 | 74.7  | 7.02  | 40 | 1 |
| Q15773     | Myeloid let7.25806452  | 1 | 1 | 1 | 28.1  | 6.9   | 0  | 1 |
| Q9BQG2     | Peroxisomal1.94805195  | 1 | 1 | 1 | 52    | 6.83  | 29 | 1 |
| Q92968     | Peroxisomal2.48138958  | 1 | 1 | 1 | 44.1  | 8.05  | 0  | 1 |
| Q9BTU6     | Phosphatidyl.67014614  | 1 | 1 | 1 | 54    | 8.29  | 28 | 1 |
| Q9GZT9     | Egl nine hc2.11267606  | 1 | 1 | 1 | 46    | 8.53  | 0  | 1 |
| P10451     | Osteopontir5.41401274  | 1 | 1 | 1 | 35.4  | 4.58  | 33 | 1 |
| Q9NPF4     | Probable tf 7.1641791  | 1 | 1 | 1 | 36.4  | 6.35  | 0  | 1 |
| J3KMZ8     | Zinc finger2.22222222  | 1 | 1 | 1 | 45.8  | 6.98  | 28 | 1 |
| Q7Z7F0     | UPF0469 prc2.11726384  | 1 | 1 | 1 | 64.8  | 8.73  | 0  | 1 |
| Q96HA1     | Nuclear env0.88070456  | 1 | 1 | 1 | 127.6 | 10.56 | 27 | 1 |
| B2R4N3     | cDNA, FLJ9f12.3287671  | 1 | 1 | 1 | 8.5   | 7.28  | 0  | 1 |
| Q5VW36     | Focadhesin 1.05496946  | 2 | 2 | 2 | 199.9 | 6.62  | 30 | 2 |
| F5H0C4     | Proteasomal3.30788804  | 1 | 1 | 1 | 42.7  | 6.16  | 0  | 1 |
| O95470     | Sphingosinc3.52112676  | 1 | 1 | 1 | 63.5  | 9.16  | 0  | 1 |
| B2RC94     | cDNA, FLJ9f3.96475771  | 1 | 1 | 1 | 25.5  | 8.66  | 18 | 1 |
| I3L4J6     | Zinc finger2.29885057  | 1 | 4 | 1 | 49.5  | 6.64  | 0  | 1 |
| Q86VS8     | Protein Hoc1.81058496  | 1 | 1 | 1 | 83.1  | 5.17  | 0  | 1 |
| AOA087WXF6 | NADH dehyd8.87850467   | 2 | 2 | 2 | 23.7  | 11.66 | 0  | 2 |
| Q9ULF5     | Zinc trans1.20336943   | 1 | 1 | 1 | 94.1  | 6.76  | 0  | 1 |
| B3KNT3     | Steroid rec3.79746835  | 1 | 1 | 1 | 25.8  | 7.46  | 0  | 1 |
| B7Z4Q0     | cDNA FLJ55f2.02702703  | 1 | 1 | 1 | 48.9  | 7.59  | 0  | 1 |
| Q5T9L3     | Protein wnt1.29390018  | 1 | 1 | 1 | 62.2  | 7.36  | 35 | 1 |

|            |              |              |   |   |   |       |       |    |   |
|------------|--------------|--------------|---|---|---|-------|-------|----|---|
| H7C426     | E3 ubiquitin | 4.70588235   | 1 | 1 | 1 | 19.4  | 5.15  | 24 | 1 |
| O60508     | Pre-mRNA-pr  | 1.208981     | 1 | 1 | 1 | 65.5  | 7.06  | 41 | 1 |
| K7ENL6     | Fas-binding  | 0.61028771   | 1 | 1 | 1 | 126.8 | 6.7   | 42 | 1 |
| AOA087WXU3 | Extended sy  | 1.3029316    | 1 | 1 | 1 | 102.3 | 9.26  | 0  | 1 |
| Q8WXD5     | Gem-associat | 7.78443114   | 1 | 1 | 1 | 18.8  | 5.12  | 40 | 1 |
| B2R6X8     | cDNA, FLJ9   | 1.77133655   | 1 | 1 | 1 | 67.6  | 8.06  | 0  | 1 |
| O43294     | Transformin  | 1.95227766   | 1 | 1 | 1 | 49.8  | 7.03  | 39 | 1 |
| Q9P253     | Vacuolar pi  | 0.71942446   | 1 | 1 | 1 | 110.1 | 6.07  | 34 | 1 |
| Q9HBL8     | NmrA-like    | 13.01003344  | 1 | 1 | 1 | 33.3  | 7.52  | 34 | 1 |
| Q9H089     | Large subu   | 2.58358663   | 2 | 2 | 2 | 75.2  | 6.38  | 29 | 2 |
| P53804     | E3 ubiquiti  | 0.98765432   | 2 | 3 | 1 | 229.7 | 7.52  | 0  | 2 |
| HOY362     | Zinc trans   | 11.4942529   | 1 | 1 | 1 | 9.9   | 7.28  | 36 | 1 |
| Q6NXXR4    | TELO2-inter  | 1.96850394   | 1 | 1 | 1 | 56.9  | 7.09  | 29 | 1 |
| J3QR07     | YTH domain   | -0.95238095  | 1 | 1 | 1 | 85.5  | 6.23  | 28 | 1 |
| P49137     | MAP kinase-  | 2            | 1 | 1 | 1 | 45.5  | 8.68  | 0  | 1 |
| O00411     | DNA-direct   | 0.89430894   | 1 | 1 | 1 | 138.5 | 8.98  | 0  | 1 |
| B2RAM2     | cDNA, FLJ9   | 1.72201722   | 1 | 1 | 1 | 92.6  | 7.65  | 0  | 1 |
| AOA1BOGUD6 | GRAM domai   | 1.93842645   | 1 | 1 | 1 | 101.1 | 6.48  | 0  | 1 |
| Q9NZD8     | Maspardin    | ( 3.8961039  | 1 | 1 | 1 | 34.9  | 6.28  | 0  | 1 |
| Q9H1I8     | Activating   | 1.05680317   | 1 | 1 | 1 | 86.3  | 5.16  | 31 | 1 |
| Q9UHW9     | Solute car   | 0.69565217   | 1 | 1 | 1 | 127.5 | 7.08  | 35 | 1 |
| Q9Y2I1     | Nischarin    | (1.13031915  | 1 | 1 | 1 | 166.5 | 5.14  | 0  | 1 |
| A6NED2     | RCC1 domai   | 5.05319149   | 1 | 1 | 1 | 40.1  | 5.27  | 19 | 1 |
| AOA024R5W0 | Hect (Homo)  | 1.16457519   | 1 | 1 | 1 | 531.9 | 6.04  | 44 | 1 |
| L8EC67     | Alternative  | 17.8571429   | 1 | 2 | 1 | 6.5   | 8.88  | 29 | 1 |
| A8K4V6     | cDNA FLJ7    | 6.4          | 1 | 1 | 1 | 19.7  | 6.79  | 35 | 1 |
| B4DZD7     | cDNA FLJ5    | 8.4.43037975 | 1 | 1 | 1 | 17.4  | 7.24  | 0  | 1 |
| Q643R3     | Lysophosph   | 5.15267176   | 1 | 1 | 1 | 57.2  | 8.97  | 0  | 1 |
| HOY5P0     | Forkhead-a   | 1.58730159   | 1 | 1 | 1 | 81    | 6.6   | 0  | 1 |
| Q9UII2     | ATPase inh   | 7.54716981   | 1 | 2 | 1 | 12.2  | 9.35  | 0  | 1 |
| Q9NX46     | Poly(ADP-ri  | 2.47933884   | 1 | 1 | 1 | 38.9  | 5.07  | 33 | 1 |
| AOA024R3M1 | Thymocyte    | r3.11111111  | 1 | 1 | 1 | 25.7  | 9.25  | 34 | 1 |
| O15360     | Fanconi ane  | 0.6185567    | 1 | 1 | 1 | 162.7 | 6.6   | 42 | 1 |
| O60524     | Nuclear exp  | 0.65055762   | 1 | 1 | 1 | 122.9 | 6.35  | 48 | 1 |
| B1AP22     | Presenilin   | 1.87110187   | 1 | 1 | 1 | 53.7  | 4.82  | 0  | 1 |
| AOA0AOMT60 | Peptidylpr   | 1.20578778   | 1 | 1 | 1 | 136.2 | 5.21  | 0  | 1 |
| J3KR35     | Coiled-coil  | 3.91061453   | 1 | 1 | 1 | 20.5  | 8.47  | 43 | 1 |
| F1LJ00     | TBC1 domai   | 1.10429448   | 1 | 1 | 1 | 92.5  | 5.31  | 0  | 1 |
| Q8WUW1     | Protein BR   | 122.6666667  | 2 | 2 | 2 | 8.7   | 5.45  | 22 | 2 |
| O43819     | Protein SC   | 6.76691729   | 1 | 1 | 1 | 29.8  | 8.85  | 0  | 1 |
| Q15047     | Histone-lys  | 1.08443067   | 1 | 1 | 1 | 143.1 | 6.02  | 31 | 1 |
| Q9NUQ7     | Ufm1-speci   | 3.19829424   | 1 | 1 | 1 | 53.2  | 7.01  | 0  | 1 |
| O95972     | Bone morph   | 1.78571429   | 1 | 1 | 1 | 45    | 9.11  | 48 | 1 |
| B2R694     | Terpene cycl | 1.36612022   | 1 | 1 | 1 | 83.4  | 6.61  | 0  | 1 |
| Q9UPT8     | Zinc finger  | 1.61166539   | 1 | 1 | 1 | 140.2 | 6.27  | 0  | 1 |
| O95302     | Peptidyl-p   | 1.40350877   | 1 | 1 | 1 | 63    | 5.08  | 0  | 1 |
| P20248     | Cyclin-A2    | (1.62037037  | 1 | 1 | 1 | 48.5  | 6.54  | 0  | 1 |
| Q8WWH5     | Probable tf  | 6.01719198   | 1 | 1 | 1 | 37.2  | 8.25  | 23 | 1 |
| Q9BW85     | Coiled-coi   | 4.95356037   | 1 | 1 | 1 | 37.1  | 5.92  | 0  | 1 |
| Q8NCEO     | tRNA-splici  | 2.3655914    | 1 | 1 | 1 | 53.2  | 7.85  | 0  | 1 |
| O14657     | Torsin-1B    | (4.16666667  | 1 | 1 | 1 | 38    | 8.54  | 0  | 1 |
| AOA0S2Z3D0 | Carbonic ar  | 3.26797386   | 1 | 1 | 1 | 49.7  | 4.72  | 0  | 1 |
| Q59FY1     | Synapse-as   | 1.74482007   | 1 | 1 | 1 | 99.7  | 6.86  | 0  | 1 |
| Q96GY3     | Protein lir  | 5.28455285   | 1 | 1 | 1 | 28.4  | 8.7   | 37 | 1 |
| Q13257     | Mitotic spi  | 3.90243902   | 1 | 1 | 1 | 23.5  | 5.08  | 0  | 1 |
| Q6P1Q9     | Methyltran   | 3.43915344   | 1 | 1 | 1 | 43.4  | 5.86  | 0  | 1 |
| Q9NPQ8     | Synembryn-   | 3.38983051   | 1 | 1 | 1 | 59.7  | 5.33  | 0  | 1 |
| Q8N139     | ATP-binding  | 0.74211503   | 1 | 1 | 1 | 184.2 | 7.36  | 0  | 1 |
| AOA0G2JK44 | Bromodomai   | r 0.9569378  | 1 | 1 | 1 | 92    | 9.16  | 24 | 1 |
| Q9NQL2     | Ras-relate   | c 1.75       | 1 | 1 | 1 | 45.6  | 4.92  | 34 | 1 |
| AOA0C4DFN3 | Monoglyceri  | 4.47284345   | 1 | 1 | 1 | 34.3  | 6.58  | 20 | 1 |
| G3V556     | Chromosome   | 7.07070707   | 1 | 1 | 1 | 11.3  | 9.16  | 24 | 1 |
| Q9H9Y2     | Ribosome pi  | 3.43839542   | 1 | 1 | 1 | 40.1  | 10.01 | 0  | 1 |
| Q8WU79     | Stromal men  | 5.36130536   | 1 | 1 | 1 | 46.8  | 8.87  | 16 | 1 |
| Q96QE5     | Transcripti  | 2.5          | 1 | 1 | 1 | 41.7  | 9.32  | 31 | 1 |
| B5BU36     | Tumor necr   | 3.40909091   | 1 | 1 | 1 | 47.9  | 5.47  | 0  | 1 |
| O15120     | 1-acyl-sn-   | 2.87769784   | 1 | 1 | 1 | 30.9  | 9.01  | 0  | 1 |
| Q9NSV4     | Protein di   | 1.08968986   | 1 | 1 | 1 | 136.8 | 7.03  | 0  | 1 |
| B4E0D0     | cDNA FLJ6    | 1(1.23647604 | 1 | 1 | 1 | 75    | 9.1   | 0  | 1 |
| B4E0E0     | cDNA FLJ5    | 4(2.40549828 | 1 | 1 | 1 | 32.5  | 9.51  | 27 | 1 |
| Q9UNZ5     | Leydig cell  | 17.07070707  | 1 | 1 | 1 | 10.6  | 11.55 | 36 | 1 |
| B4E1N4     | cDNA FLJ6    | 1(2.93159609 | 1 | 1 | 1 | 70    | 10.37 | 33 | 1 |
| Q9BSB4     | Autophagy-r  | 7.79816514   | 1 | 1 | 1 | 25    | 6.15  | 0  | 1 |

|            |                                         |   |   |   |       |       |    |   |
|------------|-----------------------------------------|---|---|---|-------|-------|----|---|
| B2RDH6     | cDNA, FLJ961.17449664                   | 1 | 1 | 1 | 67.6  | 7.08  | 0  | 1 |
| Q14146     | Unhealthy 10.91863517                   | 1 | 1 | 1 | 170.4 | 7.31  | 0  | 1 |
| G3V2U7     | Acylphosphatase 10.0775194              | 1 | 1 | 1 | 14.1  | 9.7   | 0  | 1 |
| 000161     | Synaptosome 6.63507109                  | 1 | 1 | 1 | 23.3  | 5.01  | 0  | 1 |
| A6NHJ4     | Zinc finger1.10759494                   | 1 | 1 | 1 | 73.7  | 9.33  | 0  | 1 |
| Q9H832     | Ubiquitin-c2.82485876                   | 1 | 1 | 1 | 38.2  | 5.62  | 36 | 1 |
| MOR039     | Symplekin 30                            | 1 | 1 | 1 | 5.2   | 4.32  | 0  | 1 |
| D6RCM8     | Tumor necrosis factor 4                 | 1 | 1 | 1 | 23.2  | 9.1   | 0  | 1 |
| A0A0S2Z4J3 | Succinate dehydrogenase 4.40251572      | 1 | 1 | 1 | 17    | 8.63  | 32 | 1 |
| P98161     | Polycystin-0.65070881                   | 1 | 1 | 1 | 462.2 | 6.73  | 0  | 1 |
| Q8NHP6     | Motile sperm 3.66795367                 | 1 | 1 | 1 | 59.7  | 5.96  | 0  | 1 |
| Q96CW5     | Gamma-tubulin 2.20507166                | 1 | 1 | 1 | 103.5 | 8.12  | 0  | 1 |
| Q9HD42     | Charged multimer 4.59183673             | 1 | 1 | 1 | 21.7  | 8.06  | 30 | 1 |
| A0AVT1     | Ubiquitin-10.85551331                   | 1 | 1 | 1 | 117.9 | 6.14  | 22 | 1 |
| O95630     | STAM-binding 4.71698113                 | 1 | 1 | 1 | 48    | 6.29  | 0  | 1 |
| B2RCA1     | cDNA, FLJ961.20724346                   | 1 | 2 | 1 | 113.3 | 5.8   | 0  | 1 |
| A0A024R0Y9 | Limb region 5.72597137                  | 1 | 1 | 1 | 55.2  | 8.07  | 0  | 1 |
| Q13946     | High affinity 2.69709544                | 1 | 1 | 1 | 55.5  | 7.5   | 0  | 1 |
| B7ZKS3     | Ubiquitin 1.64251208                    | 1 | 1 | 1 | 118.9 | 6     | 0  | 1 |
| B2R9T9     | cDNA, FLJ961.11522634                   | 1 | 1 | 1 | 26.2  | 10.67 | 0  | 1 |
| P51580     | Thiopurine 2.85714286                   | 1 | 1 | 1 | 28.2  | 6.23  | 0  | 1 |
| A4D1I0     | HCG1741805,1.21028744                   | 1 | 1 | 1 | 148.1 | 5.41  | 43 | 1 |
| E7EQR8     | Protein YII2.80898876                   | 1 | 4 | 1 | 38.9  | 5.6   | 31 | 1 |
| Q9Y5Q8     | General transcription factor 1.92678227 | 1 | 1 | 1 | 59.5  | 6.9   | 0  | 1 |
| A8K6V0     | cDNA FLJ786 0.7751938                   | 1 | 1 | 1 | 112.9 | 7.25  | 0  | 1 |
| A0A087X1N7 | Nebulin OS=0.14018692                   | 1 | 1 | 1 | 990.2 | 9.01  | 0  | 1 |
| Q15058     | Kinesin-like 1.33495146                 | 1 | 1 | 1 | 186.4 | 7.91  | 0  | 1 |
| Q9UID3     | Vacuolar protein 1.79028133             | 1 | 1 | 1 | 86    | 6.47  | 25 | 1 |
| MOR3A8     | PIH1 domain 5.2173913                   | 1 | 1 | 1 | 12.6  | 5.05  | 42 | 1 |
| P58004     | Sestrin-2 (2.08333333                   | 1 | 1 | 1 | 54.5  | 5.9   | 0  | 1 |
| P49903     | Selenide, v3.82653061                   | 1 | 1 | 1 | 42.9  | 5.97  | 0  | 1 |
| Q8NEZ4     | Histone-lysine 0.30543677               | 1 | 1 | 1 | 541   | 6.49  | 0  | 1 |
| A0A0B4J291 | Chromodomain 1.97238659                 | 1 | 1 | 1 | 56.5  | 8.79  | 0  | 1 |
| Q9UPZ3     | Hermansky-Bulldog 1.06288751            | 1 | 1 | 1 | 127.4 | 5.54  | 18 | 1 |
| B2RBY4     | DNA primase 2.61904762                  | 1 | 1 | 1 | 49.9  | 8.38  | 0  | 1 |
| F8VS42     | Neuronal P/2.86975717                   | 1 | 3 | 1 | 97.2  | 6.65  | 0  | 1 |
| Q96RT1     | Erbin OS=Hc 0.49575071                  | 1 | 1 | 1 | 158.2 | 5.5   | 0  | 1 |
| Q8N2G8     | GH3 domain-1.50943396                   | 1 | 1 | 1 | 57.5  | 7.88  | 35 | 1 |
| A6NMQ1     | DNA polymerase 0.61307902               | 1 | 1 | 1 | 166.4 | 5.81  | 0  | 1 |
| Q96LD4     | Tripartite 2.35109718                   | 1 | 1 | 1 | 69.5  | 6.44  | 0  | 1 |
| O95684     | FGFR1 oncogene 2.00501253               | 1 | 1 | 1 | 43    | 4.81  | 24 | 1 |
| Q93050     | V-type protein 1.07526882               | 1 | 1 | 1 | 96.4  | 6.43  | 29 | 1 |
| Q53GN7     | Mitochondrial 2.50569476                | 1 | 1 | 1 | 50.3  | 8.12  | 0  | 1 |
| A4D1V4     | Mitochondrial 6.91489362                | 1 | 1 | 1 | 21.4  | 9.73  | 0  | 1 |
| B4DVM5     | cDNA FLJ606 1.36986301                  | 1 | 1 | 1 | 57.5  | 8.87  | 0  | 1 |
| Q9BYD1     | 39S ribosome 5.61797753                 | 1 | 1 | 1 | 20.7  | 9.16  | 0  | 1 |
| A8MXB7     | Sorting nexin 4.45544554                | 1 | 1 | 1 | 23.7  | 7.28  | 29 | 1 |
| Q86YR7     | Probable glutathione 1.16696589         | 1 | 1 | 1 | 126.9 | 6.42  | 0  | 1 |
| Q59GI3     | I-kappa-B-1.00334448                    | 1 | 1 | 1 | 97    | 6.18  | 0  | 1 |
| Q658Y4     | Protein FAM 0.8353222                   | 1 | 1 | 1 | 93.9  | 6.39  | 0  | 1 |
| Q9H7N4     | Splicing factor 0.83841463              | 1 | 1 | 1 | 139.2 | 9.25  | 0  | 1 |
| A0A140VKG4 | Testis tissue 4.55445545                | 1 | 1 | 1 | 55.4  | 4.88  | 0  | 1 |
| Q8NEB9     | Phosphatidyl 1.35287486                 | 1 | 1 | 1 | 101.5 | 6.81  | 0  | 1 |
| B2R615     | cDNA, FLJ961.5.0955414                  | 1 | 1 | 1 | 17.4  | 5.12  | 38 | 1 |
| Q08499     | cAMP-specific 0.86526576                | 1 | 1 | 1 | 91.1  | 5.54  | 28 | 1 |
| Q9BT17     | Mitochondrial 6.28742515                | 1 | 1 | 1 | 37.2  | 9.47  | 0  | 1 |
| O15230     | Laminin subunit 0.2165088               | 1 | 1 | 1 | 399.5 | 7.02  | 0  | 1 |
| Q969Z3     | Mitochondrial 2.08955224                | 1 | 1 | 1 | 38    | 9.16  | 0  | 1 |
| Q9NZE8     | 39S ribosome 3.72340426                 | 1 | 1 | 1 | 21.5  | 11.3  | 0  | 1 |
| Q7Z6G3     | N-terminal 1.8134715                    | 1 | 1 | 1 | 43.2  | 5.5   | 0  | 1 |
| K7ESB7     | Dedicator of cytokinesis 0.89820359     | 1 | 1 | 1 | 148.7 | 6.9   | 0  | 1 |
| Q13488     | V-type protein 0.96385542               | 1 | 1 | 1 | 92.9  | 7.12  | 20 | 1 |
| Q5SNV9     | Uncharacterized 1.15803815              | 1 | 1 | 1 | 162.3 | 10.7  | 0  | 1 |
| A0A024R688 | Menage a trois 7.1197411                | 1 | 1 | 1 | 35.8  | 6.09  | 0  | 1 |
| Q96DE5     | Anaphase-promoting complex 13.6363636   | 1 | 1 | 1 | 11.7  | 4.97  | 18 | 1 |
| Q6ZSU8     | cDNA FLJ452 4.23280423                  | 1 | 1 | 1 | 20.8  | 5.3   | 0  | 1 |
| Q9BYD2     | 39S ribosome 3.74531835                 | 1 | 1 | 1 | 30.2  | 10.08 | 0  | 1 |
| B4DYL2     | cDNA FLJ521 1.02803738                  | 1 | 1 | 1 | 123.8 | 5.88  | 0  | 1 |
| Q7L4I2     | Arginine-specific 2.53456221            | 1 | 1 | 1 | 50.5  | 11.33 | 28 | 1 |
| O14681     | Etoposide-inhibitor 2.35294118          | 1 | 1 | 1 | 38.9  | 9.72  | 31 | 1 |
| P61927     | 60S ribosome 7.21649485                 | 1 | 1 | 1 | 11.1  | 11.74 | 39 | 1 |
| Q2M1P5     | Kinesin-like 1.04244229                 | 1 | 1 | 1 | 150.5 | 6.79  | 0  | 1 |
| Q5TCZ1     | SH3 and PX 0.70609003                   | 1 | 1 | 1 | 125.2 | 8.9   | 0  | 1 |

|            |                        |   |   |   |       |       |    |   |
|------------|------------------------|---|---|---|-------|-------|----|---|
| Q6P9B9     | Integrator 0.88321884  | 1 | 1 | 1 | 107.9 | 7.05  | 0  | 1 |
| Q14901     | Myc protei3.72340426   | 1 | 1 | 1 | 21    | 11.96 | 0  | 1 |
| Q9NW08     | DNA-direct0.61782877   | 1 | 1 | 1 | 127.7 | 8.5   | 32 | 1 |
| Q9HAT2     | Sialate 0=2.10325048   | 1 | 1 | 1 | 58.3  | 7.33  | 0  | 1 |
| P54278     | Mismatch re0.81206497  | 1 | 1 | 1 | 95.7  | 6.86  | 0  | 1 |
| E5KT15     | Endonuclea2.88461538   | 1 | 1 | 1 | 34.4  | 9.67  | 26 | 1 |
| Q6PJ73     | DPF1 protei5.07246377  | 1 | 1 | 1 | 47.5  | 8.1   | 0  | 1 |
| O43149     | Zinc fingei0.43904086  | 1 | 1 | 1 | 330.9 | 5.95  | 0  | 1 |
| Q7L590     | Protein MCA1.14285714  | 1 | 1 | 1 | 98.1  | 8.75  | 0  | 1 |
| Q6FIB4     | F11 recept3.34448161   | 1 | 1 | 1 | 32.6  | 7.9   | 41 | 1 |
| Q7OJ99     | Protein uncl.65137615  | 1 | 1 | 1 | 123.2 | 6.65  | 0  | 1 |
| P41229     | Lysine-spec1.21794872  | 1 | 1 | 1 | 175.6 | 5.58  | 17 | 1 |
| AOA0G2JLJ4 | NACHT, LRR 66.6666667  | 1 | 2 | 1 | 1.1   | 6.18  | 0  | 1 |
| O15530     | 3-phosphoir2.87769784  | 1 | 1 | 1 | 63.1  | 7.36  | 0  | 1 |
| P54284     | Voltage-dep1.44628099  | 1 | 1 | 1 | 54.5  | 6.35  | 0  | 1 |
| Q8N137     | Centrobini (2.21483942 | 1 | 1 | 1 | 101.2 | 5.54  | 0  | 1 |
| O00401     | Neural Wis14.75247525  | 1 | 1 | 1 | 54.8  | 7.93  | 0  | 1 |
| Q92947     | Glutaryl-Cc1.36986301  | 1 | 1 | 1 | 48.1  | 8.06  | 40 | 1 |
| Q2M2I8     | AP2-associ0.93652445   | 1 | 1 | 1 | 103.8 | 6.6   | 0  | 1 |
| Q9UMW8     | Ubl carboxy5.37634409  | 1 | 1 | 1 | 43    | 7.8   | 0  | 1 |
| Q59FT7     | Mitogen-act1.85185185  | 1 | 1 | 1 | 70.2  | 5.34  | 0  | 1 |
| Q8NBX0     | Saccharopir6.75990676  | 1 | 1 | 1 | 47.1  | 9.14  | 0  | 1 |
| MOR0I8     | F-box only 13          | 1 | 2 | 1 | 10.8  | 7.83  | 0  | 1 |
| Q8NDI1     | EH domain-t1.21852153  | 1 | 1 | 1 | 139.9 | 5.35  | 0  | 1 |
| Q8WXH2     | Junctophilil.06951872  | 1 | 1 | 1 | 81.4  | 9.39  | 0  | 1 |
| P51161     | Gastrotropi 9.375      | 1 | 1 | 1 | 14.4  | 6.8   | 0  | 1 |
| P33121     | Long-chain-1.14613181  | 1 | 1 | 1 | 77.9  | 7.15  | 0  | 1 |
| Q9UPT5     | Exocyst con 1.9047619  | 1 | 1 | 1 | 83.3  | 6.79  | 21 | 1 |
| Q68DH5     | LMBR1 domai1.29496403  | 1 | 1 | 1 | 81.1  | 7.5   | 0  | 1 |
| AOA0AOMR8  | Unconventic0.71827614  | 1 | 1 | 1 | 144.9 | 8.56  | 0  | 1 |
| Q99996     | A-kinase ar0.38353362  | 1 | 1 | 1 | 453.4 | 4.98  | 0  | 1 |
| Q96EX3     | WD repeat-c2.42537313  | 1 | 1 | 1 | 57.8  | 6.64  | 0  | 1 |
| Q01415     | N-acetylgall1.74672489 | 1 | 1 | 1 | 50.3  | 6.61  | 30 | 1 |
| O96033     | Molybdoptei6.81818182  | 1 | 1 | 1 | 9.7   | 4.72  | 38 | 1 |
| O60741     | Potassium/1.34831461   | 1 | 1 | 1 | 98.7  | 8.4   | 0  | 1 |
| L8E7K0     | Alternative6.41025641  | 1 | 1 | 1 | 19    | 12.06 | 0  | 1 |
| Q53EL5     | Zinc fingei5.55555556  | 1 | 1 | 1 | 25.1  | 8.31  | 0  | 1 |
| Q5SY16     | Polynucleot2.27920228  | 1 | 1 | 1 | 79.3  | 9.13  | 0  | 1 |
| B4DI41     | cDNA FLJ552.13414634   | 1 | 1 | 1 | 72.4  | 9.38  | 0  | 1 |
| Q9H8M5     | Metal tran1.14285714   | 1 | 1 | 1 | 96.6  | 6.38  | 0  | 1 |
| Q5XKP0     | MICOS comp15.08474576  | 1 | 1 | 1 | 13.1  | 9.42  | 0  | 1 |
| Q9H0P0     | Cytosolic f4.76190476  | 1 | 1 | 1 | 37.9  | 7.12  | 0  | 1 |
| Q5TH69     | Brefeldin /0.27560864  | 1 | 1 | 1 | 240.5 | 5.82  | 0  | 1 |
| R4GMX1     | Tensin-2 (f3.04568528  | 1 | 2 | 1 | 21.5  | 5.76  | 43 | 1 |
| Q13443     | Disintegrir2.93040293  | 1 | 1 | 1 | 90.5  | 7.52  | 0  | 1 |
| B3KW44     | Methyltran1.71990172   | 1 | 1 | 1 | 47    | 8.91  | 0  | 1 |
| X5DNK3     | Receptor pl1.03585657  | 1 | 3 | 1 | 137.8 | 5.91  | 0  | 1 |
| Q09327     | Beta-1,4-me1.31332083  | 1 | 1 | 1 | 61.3  | 8.28  | 37 | 1 |
| P19801     | Amiloride=3.32889481   | 1 | 3 | 1 | 85.3  | 7.09  | 0  | 1 |
| P22670     | MHC class 1l.12359551  | 1 | 1 | 1 | 104.7 | 6.29  | 0  | 1 |
| B3KWH9     | Elongation 2.00668896  | 1 | 1 | 1 | 35.3  | 9.41  | 30 | 1 |
| Q6IBT5     | NEU1 protei2.65060241  | 1 | 1 | 1 | 45.5  | 5.88  | 0  | 1 |
| F5GXV7     | Neurobeachi0.61079063  | 1 | 1 | 1 | 327.8 | 6.18  | 0  | 1 |
| AOA024QYR6 | Mitochondri1.38888889  | 1 | 1 | 1 | 64.8  | 8     | 0  | 1 |
| B2R829     | cDNA, FLJ91.47420147   | 1 | 1 | 1 | 45.8  | 9.76  | 40 | 1 |
| B2RBF3     | cDNA, FLJ913.18181818  | 1 | 1 | 1 | 50.1  | 7.58  | 0  | 1 |
| Q9UKX5     | Integrin all.17845118  | 1 | 1 | 1 | 133.4 | 6.7   | 0  | 1 |
| Q8ND61     | Uncharacter1.32743363  | 1 | 1 | 1 | 101.2 | 9.13  | 24 | 1 |
| Q9H944     | Mediator of5.18867925  | 1 | 2 | 1 | 23.2  | 6.87  | 0  | 1 |
| Q6ZMIO     | Protein ph1.02564103   | 1 | 1 | 1 | 88.3  | 6.84  | 0  | 1 |
| Q9UL49     | Transcripti 3.4        | 1 | 2 | 1 | 52.7  | 6.84  | 0  | 1 |
| A6NDA2     | cDNA, FLJ916.71936759  | 1 | 1 | 1 | 27.8  | 9.82  | 0  | 1 |
| O60333     | Kinesin-li10.60572687  | 1 | 1 | 1 | 204.3 | 5.6   | 0  | 1 |
| B2R673     | Dihydrolip2.79441118   | 1 | 1 | 1 | 54    | 8.76  | 0  | 1 |
| Q59GX7     | Stearoyl-Cc1.63934426  | 1 | 1 | 1 | 42.3  | 9.25  | 58 | 1 |
| HOYKMO     | RAS guanyl- 0.8254717  | 1 | 1 | 1 | 95.9  | 8.15  | 0  | 1 |
| C9JQI7     | Transmembr1.36986301   | 1 | 1 | 1 | 76.4  | 8.06  | 0  | 1 |
| Q8WWW15    | Choline tre2.13089802  | 1 | 1 | 1 | 73.3  | 8.6   | 0  | 1 |
| Q9BVS4     | Serine/thre2.53623188  | 1 | 1 | 1 | 63.2  | 5.94  | 0  | 1 |
| Q96NE9     | FERM domair1.60771704  | 1 | 1 | 1 | 72    | 7.46  | 0  | 1 |
| D3DNE5     | DAZ interac0.78226858  | 1 | 1 | 1 | 86.8  | 7.05  | 31 | 1 |
| P61009     | Signal pept8.88888889  | 1 | 1 | 1 | 20.3  | 8.62  | 0  | 1 |
| Q96J17     | Spatascin (0.98239869  | 1 | 1 | 1 | 278.7 | 5.97  | 0  | 1 |

|            |                         |             |   |   |   |       |      |    |   |
|------------|-------------------------|-------------|---|---|---|-------|------|----|---|
| Q8IYM9     | E3 ubiquitin            | 2.40963855  | 1 | 1 | 1 | 56.9  | 7.72 | 0  | 1 |
| Q8NBZ7     | UDP-glucuronidase       | 5.95238095  | 1 | 1 | 1 | 47.5  | 8.94 | 0  | 1 |
| B2RA50     | cdNA, FLJ945            | 5.51724138  | 1 | 1 | 1 | 16.8  | 9.14 | 0  | 1 |
| Q86WA6     | Valacyclovir            | 3.09278351  | 1 | 1 | 1 | 32.5  | 9.14 | 0  | 1 |
| AOA1BOGTY7 | Transmembrane protein   | 12.3966942  | 1 | 2 | 1 | 14.6  | 9.88 | 18 | 1 |
| Q96EB6     | NAD-dependent protein   | 1.07095047  | 1 | 1 | 1 | 81.6  | 4.67 | 0  | 1 |
| AOA024R8V2 | Transmembrane protein   | 1.98757764  | 1 | 1 | 1 | 90    | 8.66 | 0  | 1 |
| Q9Y6N7     | Roundabout protein      | 1.93821926  | 1 | 2 | 1 | 180.8 | 6.04 | 0  | 1 |
| P49006     | MARCKS-related protein  | 6.66666667  | 1 | 1 | 1 | 19.5  | 4.67 | 21 | 1 |
| AOA024QZ61 | Myomesin (A)            | 0.81911263  | 1 | 1 | 1 | 164.8 | 6.19 | 0  | 1 |
| HOYJ12     | Serine/threonine kinase | 22.22222222 | 1 | 1 | 1 | 5.2   | 8.5  | 0  | 1 |
| Q8NE01     | Metalloproteinase       | 1.27298444  | 1 | 1 | 1 | 76.1  | 6.09 | 32 | 1 |
| Q9H7N8     | FLJ00030 protein        | 11.2449799  | 1 | 1 | 1 | 27.4  | 8.31 | 0  | 1 |
| Q13535     | Serine/threonine kinase | 0.30257186  | 1 | 1 | 1 | 301.2 | 7.43 | 0  | 1 |
| PODJD7     | Pepsin A-4              | 2.06185567  | 1 | 1 | 1 | 42    | 4.34 | 24 | 1 |
| Q9P0I2     | ER membrane protein     | 5.36398467  | 1 | 1 | 1 | 29.9  | 6.81 | 0  | 1 |
| B4DUE4     | cdNA FLJ614             | 1.08527132  | 1 | 1 | 1 | 71    | 5.58 | 0  | 1 |
| Q8NG48     | Protein Lir             | 0.79260238  | 1 | 2 | 1 | 85.8  | 6.52 | 52 | 1 |
| AOA0A7KU15 | TSC1-PDGFR              | 0.8683068   | 1 | 1 | 1 | 154.5 | 6.04 | 29 | 1 |
| Q6IAN0     | Dehydrogenase           | 3.38461538  | 1 | 1 | 1 | 35.1  | 9.55 | 0  | 1 |
| Q03001     | Dystonin                | 0.27741083  | 1 | 3 | 1 | 860.1 | 5.25 | 0  | 1 |
| H3BM00     | Protein-glucosylase     | 16.5803109  | 1 | 3 | 1 | 20.9  | 5.96 | 0  | 1 |
| Q8WVD5     | RING finger             | 6.52173913  | 1 | 1 | 1 | 25.5  | 5.2  | 0  | 1 |
